# Supplementary material for: A modular approach to catalytic stereoselective synthesis of chiral 1,2-diols and 1,3-diols
Source: PubMed Central journal article supplement — Nat Commun. 2025 Jan 3;16:364. doi: 10.1038/s41467-024-55744-3 (PMC11699147; doi:10.1038/s41467-024-55744-3), 2025-01-03
Supplement: 41467_2024_55744_MOESM1_ESM.pdf [file 41467_2024_55744_MOESM1_ESM.pdf]

## Supplementary Information

# A Modular Approach to Catalytic Stereoselective Synthesis of Chiral 1,2-Diols and 1,3-Diols

Sheng Xu<sup>1†</sup>, Yuanyuan Ping<sup>1†</sup>, Yinyan Su<sup>1†</sup>, Haoyun Guo<sup>1</sup>, Aowei Luo<sup>1</sup>, Wangqing Kong<sup>1,2\*</sup>

<sup>1</sup>The Institute for Advanced Studies and Hongyi Honor College, Wuhan University, 299 Bayi Road, Wuhan 430072, China

<sup>2</sup>Wuhan Institute of Photochemistry and Technology, 7 North Bingang Road, Wuhan 430083, China

†These authors contributed equally: Sheng Xu, Yuanyuan Ping and Yinyan Su

Email: wqkong@whu.edu.cn

# Contents

|                                        |      |
|----------------------------------------|------|
| 1. General Information                 | S3   |
| 2. General Procedures                  | S4   |
| 3. Optimization of Reaction Conditions | S10  |
| 4. Characterization Data of Products   | S12  |
| 5. Mechanistic Studies                 | S127 |
| 6. Synthetic Applications              | S142 |
| 7. X-Ray Crystallographic Data         | S154 |
| 8. NMR Spectra                         | S182 |
| 9. Supplementary References            | S301 |

## 1. General Information

$^1\text{H}$  NMR,  $^{13}\text{C}$  NMR and  $^{19}\text{F}$  NMR data were recorded with Bruker ADVANCE III (600 MHz) or JNM-ECZ400S/L1 (400 MHz) spectrometers. Chemical shifts are given in ppm. The spectra are calibrated to the residual  $^1\text{H}$  and  $^{13}\text{C}$  signals of the solvents. Multiplicities are abbreviated as follows: singlet (s), doublet (d), triplet (t), quartet (q), doublet-doublet (dd), quintet (quint), septet (sept), multiplet (m), and broad (b).  $^{19}\text{F}$  NMR spectra were recorded using  $\text{CFCl}_3$  as internal standard. Gas chromatography were determined with a SHIMADZU Nexis GC 2030 gas chromatography instrument with a FID detector. High-resolution mass spectra (HRMS) were recorded on Thermo Fisher Orbitrap Elite mass spectrometer. The photoreaction instrument (WPTEC-1020LC) was purchased from WATTCAS, China.

Unless otherwise stated, starting materials were purchased from commercial suppliers (Stream, Leyan.com, Energy Chemical and so on). All reactions dealing with air- or moisture-sensitive compounds were performed in the argon-filled glove box or by standard Schlenk techniques in oven-dried reaction vessels under argon atmosphere. Solvents were purchased in HPLC quality, degassed by purging thoroughly with argon and dried over activated molecular sieves of appropriate size. More sensitive compounds were stored in a desiccator or in a glove-box if required. Reactions were monitored by thin layer chromatography (TLC) using glass 0.25 mm silica gel plates. Compounds were visualized by UV-light at 254 nm and by dipping the plates in an aqueous potassium permanganate solution followed by heating. Flash column chromatography was performed over silica gel (200-400 mesh).

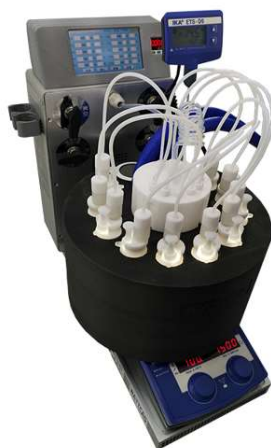

**Supplementary Figure 1.** The photoreaction instrument: WATTCAS\_WP-TEC-1020LC

## 2. General Procedures

### 2.1 General procedure for the synthesis of 1-aryl-1,2-diols

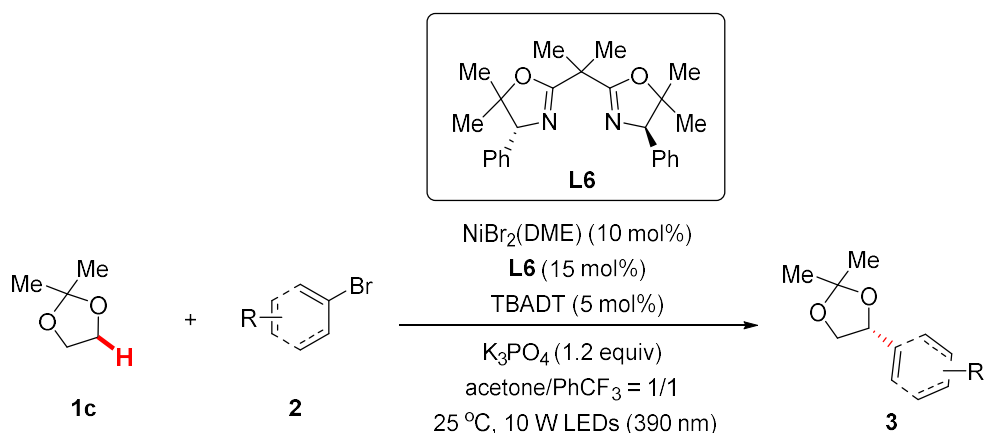

An oven-dried 10-mL vial equipped with a PTFE-coated stir bar was charged with NiBr<sub>2</sub>(dme) (6.1 mg, 0.02 mmol, 10 mol%), **L6** (11.7 mg, 0.03 mmol, 15 mol%) and anhydrous acetone (0.5 mL). This reaction mixture was stirred at room temperature for 1 hour in an argon-filled glovebox. TBADT (33.5 mg, 0.02 mmol, 5 mol%), aryl or alkenyl bromide **2** (0.2 mmol, 1 equiv), 2,2-dimethyl-1,3-dioxolane **1c** (102.1 mg, 1.0 mmol, 5 equiv), K<sub>3</sub>PO<sub>4</sub> (50.9 mg, 0.24 mmol, 1.2 equiv) and PhCF<sub>3</sub> (0.5 mL) was then added. The reaction mixture was stirred and irradiated with a 10 W 390 nm LED lamp at 25 °C for 60 hours. The resulting mixture was removed from light, diluted with ethyl acetate and passed through a pad of celite. The celite plug was further washed with ethyl acetate. The combined solvent was then evaporated under reduced pressure, and the residue was purified by column chromatography on silica gel, eluting with hexane/EA (20/1~1/1) to afford the corresponding products **3**.

## 2.2 General procedure for the synthesis of 1-aryl-1,3-diols

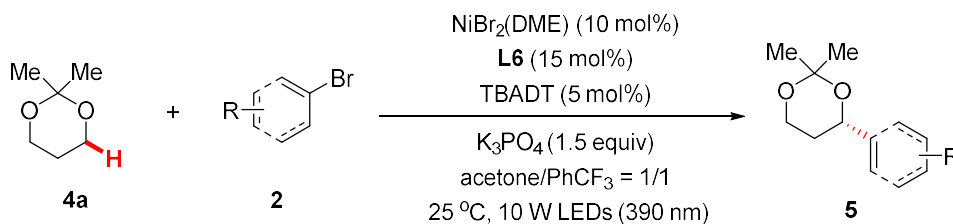

An oven-dried 10-mL vial equipped with a PTFE-coated stir bar was charged with NiBr<sub>2</sub>(dme) (6.1 mg, 0.02 mmol, 10 mol%), **L6** (11.7 mg, 0.03 mmol, 15 mol%) and anhydrous acetone (0.5 mL). This reaction mixture was stirred at room temperature for 1 hour in an argon-filled glovebox. TBADT (33.5 mg, 0.02 mmol, 5 mol%), aryl or alkenyl bromide **2** (0.2 mmol, 1 equiv), 2,2-dimethyl-1,3-dioxane **4a** (232.0 mg, 2.0 mmol, 10 equiv), K<sub>3</sub>PO<sub>4</sub> (63.6 mg, 0.3 mmol, 1.5 equiv) and PhCF<sub>3</sub> (0.5 mL) was then added. The reaction mixture was stirred and irradiated with a 10 W 390 nm LED lamp at 25 °C for 60 hours. The resulting mixture was removed from light, diluted with ethyl acetate and passed through a pad of celite. The celite plug was further washed with ethyl acetate. The combined solvent was then evaporated under reduced pressure, and the residue was purified by column chromatography on silica gel, eluting with hexane/EA (20/1~1/1) to afford the corresponding products **5**.

### 2.3 General procedure for the synthesis of 1,2-syn-diols bearing vicinal stereocenters

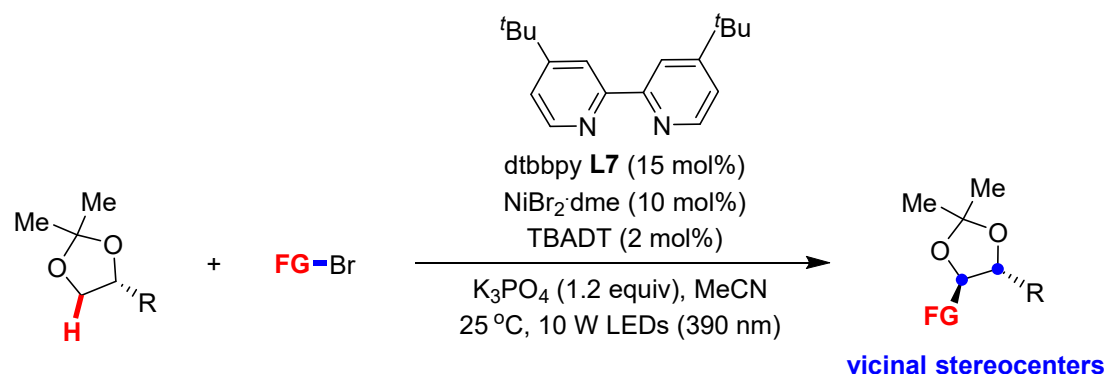

An oven-dried 10-mL vial equipped with a PTFE-coated stir bar was charged with NiBr<sub>2</sub>(dme) (6.2 mg, 0.02 mmol, 10 mol%), dtbbpy (8.1 mg, 0.03 mmol, 15 mol%), TBADT (13.4 mg, 0.004 mmol, 2 mol%), electrophilic reagent (aryl bromide, alkenyl bromide, *gem*-difluoroalkene, or alkynyl bromide) (0.2 mmol, 1 equiv), acetone-protected 1,2-diol (1.0 mmol, 5 equiv), K<sub>3</sub>PO<sub>4</sub> (50.9 mg, 0.24 mmol, 1.2 equiv) and anhydrous MeCN (2 mL). The reaction mixture was stirred and irradiated with a 10 W 390 nm LED lamp at 25 °C for 60 hours. The resulting mixture was removed from light, diluted with ethyl acetate and passed through a pad of celite. The celite plug was further washed with ethyl acetate. The combined solvent was then evaporated under reduced pressure, and the residue was purified by column chromatography on silica gel, eluting with hexane/EA (20/1~1/1) to afford the corresponding products.

## 2.4 General procedure for the synthesis of 1,3-*syn*-diols bearing 1,3-nonadjacent stereocenters

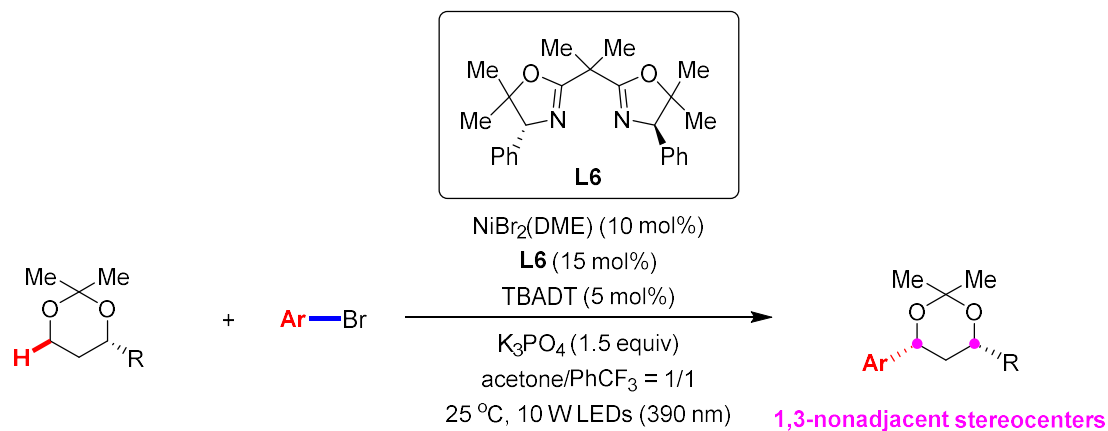

An oven-dried 10-mL vial equipped with a PTFE-coated stir bar was charged with NiBr<sub>2</sub>(dme) (6.2 mg, 0.02 mmol, 10 mol%), L6 (11.7 mg, 0.03 mmol, 15 mol%), TBADT (33.5 mg, 0.02 mmol, 5 mol%), aryl bromides (0.2 mmol, 1 equiv), acetonide-protected 1,3-diol (0.6 mmol, 3 equiv), K<sub>3</sub>PO<sub>4</sub> (42.4 mg, 0.2 mmol, 1.0 equiv) and anhydrous MeCN (1 mL) and anhydrous acetone (1 mL). The reaction mixture was stirred and irradiated with a 10 W 390 nm LED lamp at 25 °C for 60 hours. The resulting mixture was removed from light, diluted with ethyl acetate and passed through a pad of celite. The celite plug was further washed with ethyl acetate. The combined solvent was then evaporated under reduced pressure, and the residue was purified by column chromatography on silica gel, eluting with hexane/EA (20/1~1/1) to afford the corresponding products.

## 2.5 General procedure for the gram-scale batch synthesis of product **3co**.

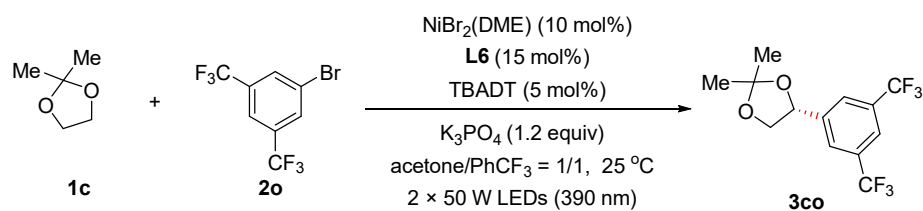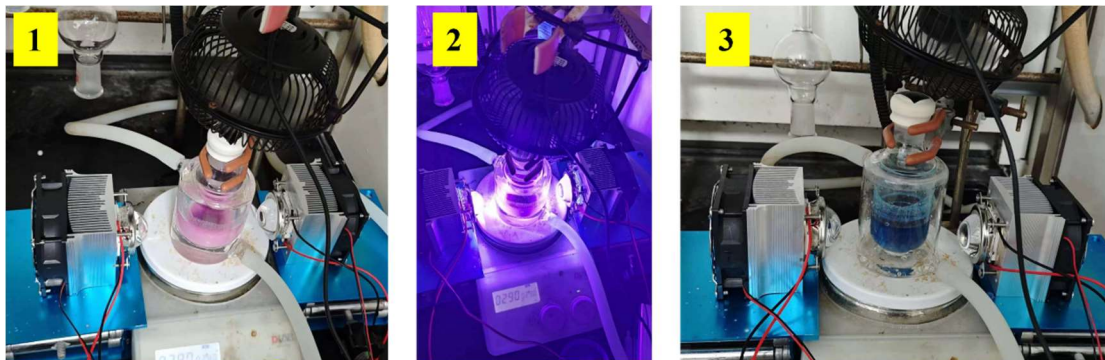

Supplementary Figure 2. Reaction process diagram

An oven-dried 100-mL vial equipped with a PTFE-coated stir bar was charged with  $\text{NiBr}_2(\text{dme})$  (184.8 mg, 0.6 mmol, 10 mol%), **L6** (350.1 mg, 0.9 mmol, 15 mol%) and anhydrous acetone (15 mL). This reaction mixture was stirred at room temperature for 1 hour in an argon-filled glovebox. TBADT (777.6 mg, 0.3 mmol, 5 mol%), 1-bromo-3,5-bis(trifluoromethyl)benzene **2o** (1.75 g, 6.0 mmol, 1 equiv), 2,2-dimethyl-1,3-dioxolane **1c** (3.06 g, 30.0 mmol, 5 equiv),  $\text{K}_3\text{PO}_4$  (1.52 g, 7.2 mmol, 1.2 equiv) and  $\text{PhCF}_3$  (15 mL) was then added. The reaction mixture was stirred and irradiated with a 2×50 W 390 nm LED lamp at 25 °C. The resulting mixture was removed from light, diluted with ethyl acetate and passed through a pad of celite. The celite plug was further washed with ethyl acetate. The combined solvent was then evaporated under reduced pressure, and the residue was purified by column chromatography on silica gel, eluting with hexane/EA (100/1~50/1) to afford the corresponding products **3co** (1.18 g, 63% yield, 90% ee).



## 2.6 General procedure for the gram-scale batch synthesis of product **5aa**

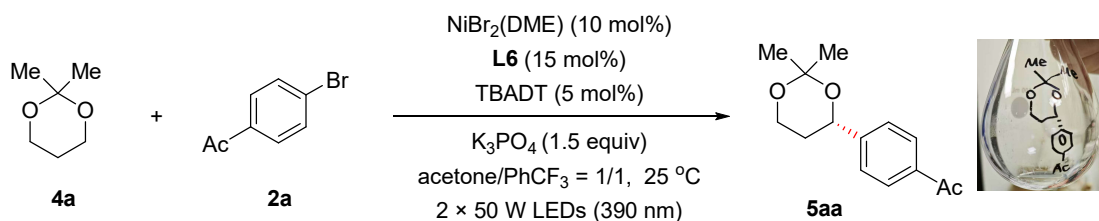

An oven-dried 100-mL vial equipped with a PTFE-coated stir bar was charged with  $\text{NiBr}_2(\text{dme})$  (307.9 mg, 1.0 mmol, 10 mol%), **L6** (583.5 mg, 1.5 mmol, 15 mol%) and anhydrous acetone (25 mL). This reaction mixture was stirred at room temperature for 1 hour in an argon-filled glovebox. TBADT (1.29 g, 0.5 mmol, 5 mol%), 1-(4-bromophenyl)ethan-1-one **2a** (1.98 g, 10.0 mmol, 1 equiv), 2,2-dimethyl-1,3-dioxane **4a** (5.81 g, 50.0 mmol, 5 equiv),  $\text{K}_3\text{PO}_4$  (3.18 g, 15.0 mmol, 1.5 equiv) and  $\text{PhCF}_3$  (25 mL) was then added. The reaction mixture was stirred and irradiated with a 2x50 W 390 nm LED lamp at 25 °C. The resulting mixture was removed from light, diluted with ethyl acetate and passed through a pad of celite. The celite plug was further washed with ethyl acetate. The combined solvent was then evaporated under reduced pressure, and the residue was purified by column chromatography on silica gel, eluting with hexane/EA (20/1~3/1) to afford the corresponding products **5aa** (1.49 g, 64% yield, 91% ee).

### 3. Optimization of Reaction Conditions

**Table S1: Screening of chiral ligands**

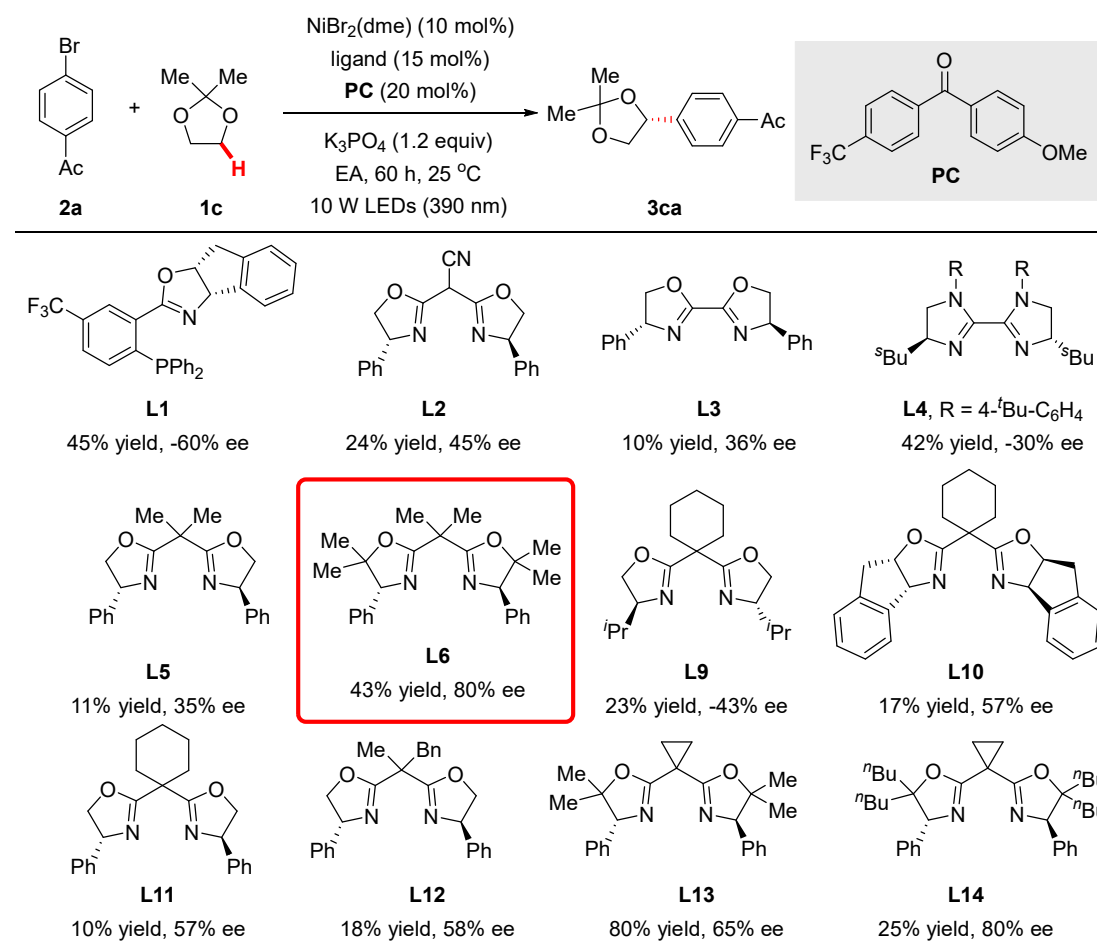

**Table S2: Optimization of reaction conditions for the diastereoselective C(sp<sup>3</sup>)-H arylation for the synthesis of 1,3-diaryl-1,3-syn-diols**

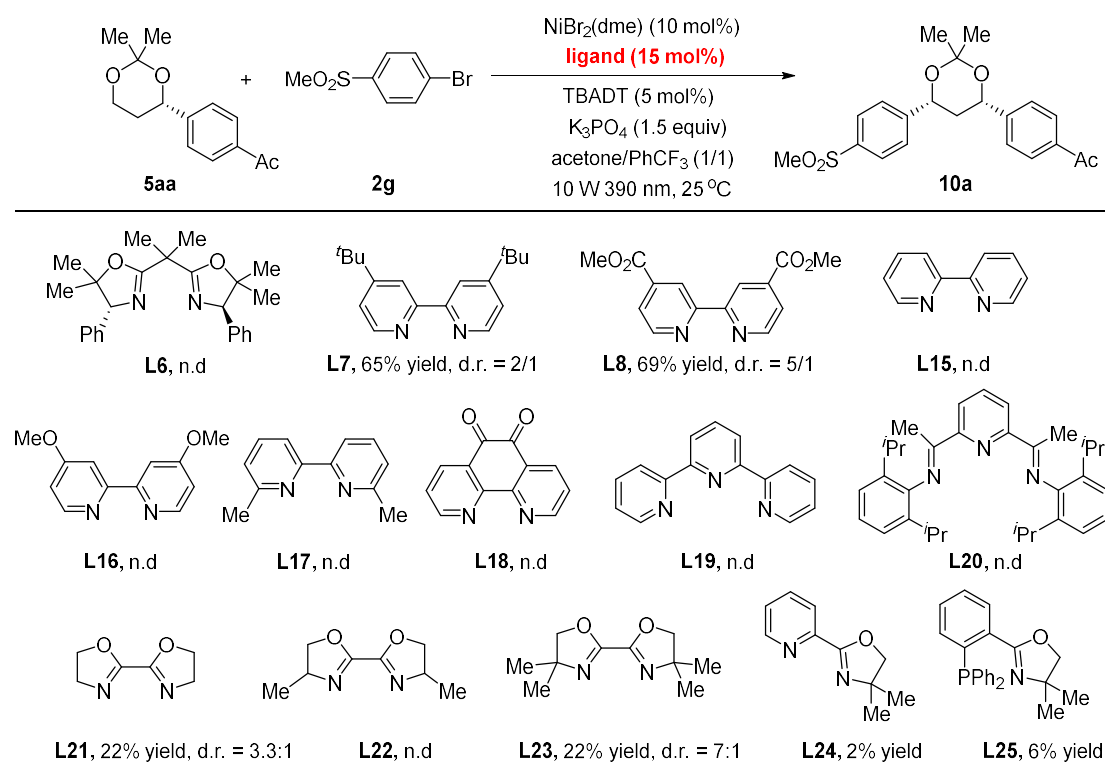

Reaction conditions: **5aa** (2 mmol, 10 equiv), **2g** (0.2 mmol, 1 equiv), NiBr<sub>2</sub>(dme) (10 mol%), ligand (15 mol%), TBADT (5 mol%), K<sub>3</sub>PO<sub>4</sub> (1.5 equiv) in acetone/PhCF<sub>3</sub> (0.5/0.5 mL) at 25 °C under irradiation of LEDs (10 W, 390 nm) for 60 h.

## 4. Characterization data of products

### (*R*)-1-(4-(2,2-dimethyl-1,3-dioxolan-4-yl)phenyl)ethan-1-one (**3ca**)

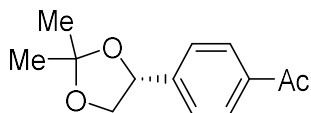

Chemical Formula: C<sub>13</sub>H<sub>16</sub>O<sub>3</sub>

Exact Mass: 220.1099

**3ca** was prepared according to general procedure **2.1** using NiBr<sub>2</sub>•dme (6.6 mg, 0.02 mmol, 10 mol%), **L6** (11.7 mg, 0.03 mmol, 15 mol%), 1-(4-bromophenyl)ethan-1-one (40.0 mg, 0.20 mmol, 1 equiv), 2,2-dimethyl-1,3-dioxolane (102.1 mg, 1.0 mmol, 5 equiv), TBADT (33.5 mg, 0.02 mmol, 5 mol%), K<sub>3</sub>PO<sub>4</sub> (51.2 mg, 0.24 mmol, 1.2 equiv) and anhydrous acetone/PhCF<sub>3</sub> (0.5 mL/0.5 mL) and was purified by silica gel column chromatography (PE/EA = 10/1) to obtain **3ca** as colorless oil (34.8 mg, 71% yield, 90% ee). R<sub>f</sub> = 0.4 (PE/EA = 10/1).

<sup>1</sup>H NMR (600 MHz, CDCl<sub>3</sub>) δ 8.07 – 7.89 (m, 2H), 7.63 – 7.36 (m, 2H), 5.14 (t, *J* = 7.1 Hz, 1H), 4.35 (dd, *J* = 8.2, 6.4 Hz, 1H), 3.69 (t, *J* = 8.0 Hz, 1H), 2.60 (s, 3H), 1.56 (s, 3H), 1.50 (s, 3H);

<sup>13</sup>C NMR (151 MHz, CDCl<sub>3</sub>) δ 197.7, 144.8, 136.8, 128.6, 126.2, 110.2, 77.4, 71.4, 26.6, 26.5, 25.9;

The enantiomeric purity was established by HPLC analysis using a chiral column: AD-H column, 30 °C, <sup>n</sup>Hexane/<sup>i</sup>Propanol = 80/20 as eluent, 224 nm, 1 mL/min. t<sub>R</sub> = 5.5 min (major), 5.2 min (minor).

HRMS: (APCI) calcd for C<sub>13</sub>H<sub>17</sub>O<sub>3</sub><sup>+</sup>[M+H]<sup>+</sup> 221.1172; found 221.1168.

Optical Rotation: [α]<sub>D</sub><sup>21</sup> -77.0 (c 0.2, <sup>i</sup>PrOH) for 90% ee.

Absolute stereochemistry was determined through analogy with **3cg**.

<Chromatogram>

mAU

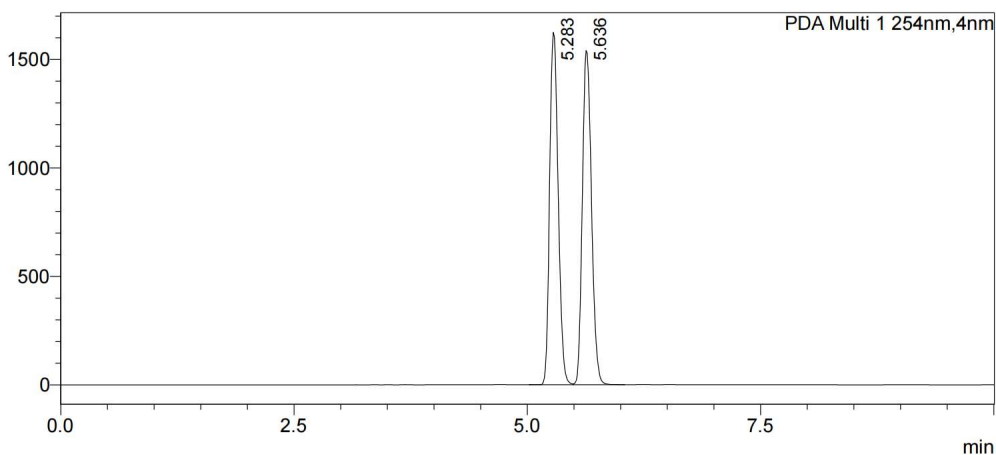

<Peak Table>

PDA Ch1 254nm

| Peak# | Ret. Time | Area     | Height  | Conc. | Unit | Mark | Name |
|-------|-----------|----------|---------|-------|------|------|------|
| 1     | 5.283     | 10347060 | 1623451 | 0.000 |      | M    |      |
| 2     | 5.636     | 10516954 | 1539909 | 0.000 |      | V M  |      |
| Total |           | 20864014 | 3163360 |       |      |      |      |

Supplementary Figure 3. HPLC spectrum of racemic-3ca

<Chromatogram>

mAU

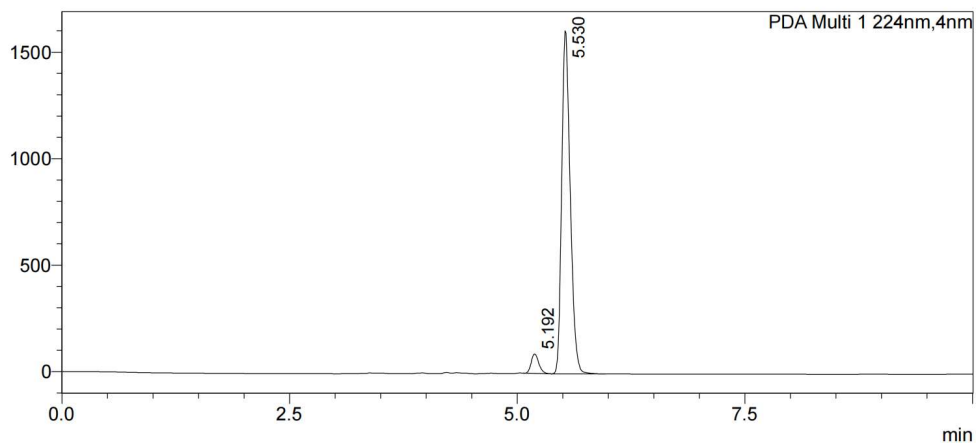

<Peak Table>

PDA Ch1 224nm

| Peak# | Ret. Time | Area     | Height  | Conc.  | Unit | Mark | Name |
|-------|-----------|----------|---------|--------|------|------|------|
| 1     | 5.192     | 531445   | 91556   | 4.817  |      | M    |      |
| 2     | 5.530     | 10502285 | 1609999 | 95.183 |      | M    |      |
| Total |           | 11033730 | 1701555 |        |      |      |      |

Supplementary Figure 4. HPLC spectrum of (R)-3ca

**(R)-4-(2,2-dimethyl-1,3-dioxolan-4-yl)benzotrile (3cb)**

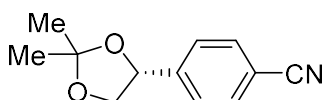

Chemical Formula: C<sub>12</sub>H<sub>13</sub>NO<sub>2</sub>

Exact Mass: 203.0946

**3cb** was prepared according to general procedure **2.1** using NiBr<sub>2</sub>•dme (6.6 mg, 0.02 mmol, 10 mol%), **L6** (11.7 mg, 0.03 mmol, 15 mol%), 4-bromobenzotrile (36.4 mg, 0.20 mmol, 1 equiv), 2,2-dimethyl-1,3-dioxolane (102.1 mg, 1.0 mmol, 5 equiv), TBADT (33.5 mg, 0.02 mmol, 5 mol%), K<sub>3</sub>PO<sub>4</sub> (51.2 mg, 0.24 mmol, 1.2 equiv) and anhydrous acetone/PhCF<sub>3</sub> (0.5 mL/0.5 mL) and was purified by silica gel column chromatography (PE/EA = 10/1) to obtain **3cb** as colorless oil (25.2 mg, 62% yield, 93% ee). R<sub>f</sub> = 0.5 (PE/EA = 10/1).

The NMR data matched those reported in the literature.<sup>1</sup>

<sup>1</sup>H NMR (400 MHz, CDCl<sub>3</sub>) δ 7.68 – 7.60 (m, 2H), 7.51 – 7.43 (m, 2H), 5.11 (t, *J* = 7.0 Hz, 1H), 4.35 (dd, *J* = 8.3, 6.4 Hz, 1H), 3.66 (t, *J* = 7.9 Hz, 1H), 1.54 (s, 3H), 1.48 (s, 3H);

<sup>13</sup>C NMR (101 MHz, CDCl<sub>3</sub>) δ 145.1, 132.5, 126.8, 118.8, 111.9, 110.5, 71.4, 26.5, 25.8;

The enantiomeric purity was established by HPLC analysis using a chiral column: AD-H column, 30 °C, <sup>n</sup>Hexane/<sup>i</sup>Propanol = 95/5 as eluent, 204 nm, 1 mL/min. t<sub>R</sub> = 7.5 min (major), 7.1 min (minor).

HRMS: (APCI) calcd for C<sub>12</sub>H<sub>14</sub>NO<sub>2</sub><sup>+</sup>[M+H]<sup>+</sup> 204.1019; found 204.1014.

Optical Rotation: [α]<sub>D</sub><sup>21</sup> -69.6 (c 0.1, <sup>i</sup>PrOH) for 93% ee.

Absolute stereochemistry was determined through analogy with **3cg**.

<Chromatogram>

mAU

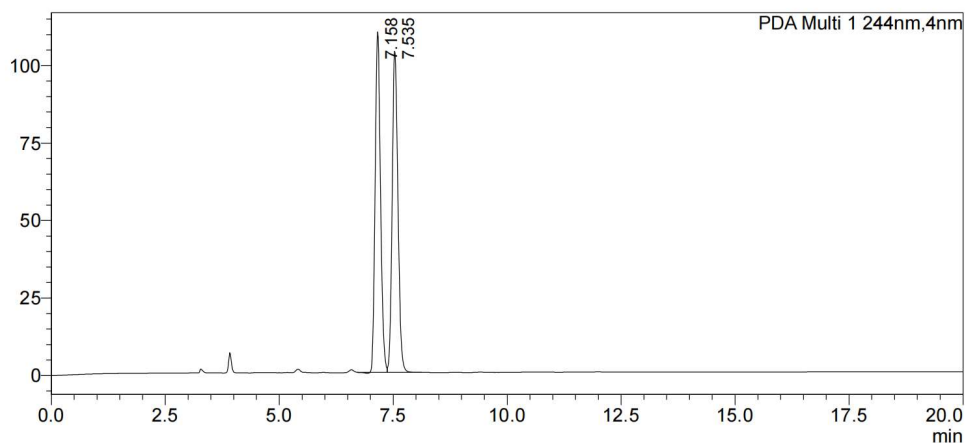

<Peak Table>

PDA Ch1 244nm

| Peak# | Ret. Time | Area    | Height | Conc. | Unit | Mark | Name |
|-------|-----------|---------|--------|-------|------|------|------|
| 1     | 7.158     | 903717  | 109829 | 0.000 |      | M    |      |
| 2     | 7.535     | 912413  | 103609 | 0.000 |      | V M  |      |
| Total |           | 1816130 | 213438 |       |      |      |      |

Supplementary Figure 5. HPLC spectrum of racemic-3cb

<Chromatogram>

mAU

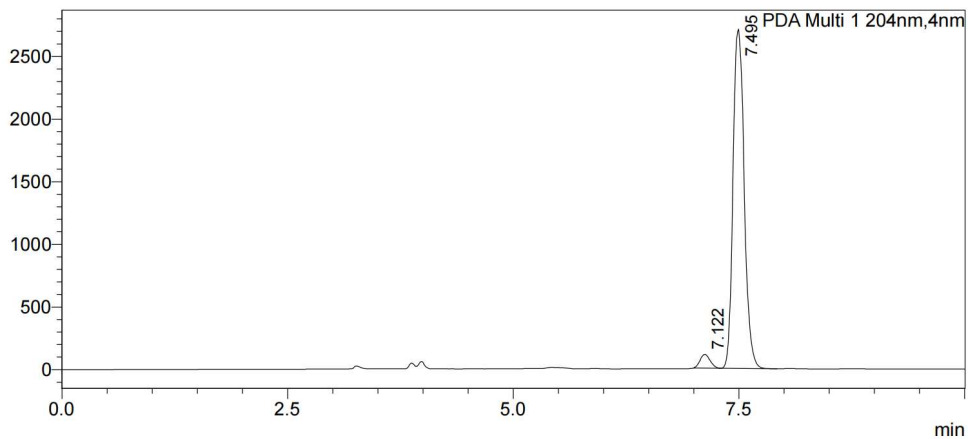

<Peak Table>

PDA Ch1 204nm

| Peak# | Ret. Time | Area     | Height  | Conc. | Unit | Mark | Name |
|-------|-----------|----------|---------|-------|------|------|------|
| 1     | 7.122     | 842626   | 109790  | 0.000 |      | M    |      |
| 2     | 7.495     | 23266140 | 2707824 | 0.000 |      | M    |      |
| Total |           | 24108767 | 2817614 |       |      |      |      |

Supplementary Figure 6. HPLC spectrum of (R)-3cb

**(R)-2,2-dimethyl-4-(4-(trifluoromethyl)phenyl)-1,3-dioxolane (3cc)**

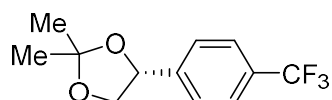

Chemical Formula: C<sub>12</sub>H<sub>13</sub>F<sub>3</sub>O<sub>2</sub>

Exact Mass: 246.0868

**3cc** was prepared according to general procedure **2.1** using NiBr<sub>2</sub>•dme (6.6 mg, 0.02 mmol, 10 mol%), **L6** (11.7 mg, 0.03 mmol, 15 mol%), 1-bromo-4-(trifluoromethyl)benzene (45.0 mg, 0.20 mmol, 1 equiv), 2,2-dimethyl-1,3-dioxolane (102.1 mg, 1.0 mmol, 5 equiv), TBADT (33.5 mg, 0.02 mmol, 5 mol%), K<sub>3</sub>PO<sub>4</sub> (51.2 mg, 0.24 mmol, 1.2 equiv) and anhydrous acetone/PhCF<sub>3</sub> (0.5 mL/0.5 mL) and was purified by silica gel column chromatography (PE/EA = 50/1) to obtain **3cb** as colorless oil (29.5 mg, 60% yield, 90% ee). R<sub>f</sub> = 0.5 (PE/EA = 50/1).

The NMR data matched those reported in the literature.<sup>2</sup>

<sup>1</sup>H NMR (600 MHz, CDCl<sub>3</sub>) δ 7.62 (d, *J* = 8.1 Hz, 2H), 7.48 (d, *J* = 8.0 Hz, 2H), 5.13 (t, *J* = 7.0 Hz, 1H), 4.36 (dd, *J* = 8.3, 6.3 Hz, 1H), 3.69 (t, *J* = 8.0 Hz, 1H), 1.56 (s, 3H), 1.50 (s, 3H);

<sup>13</sup>C NMR (151 MHz, CDCl<sub>3</sub>) δ 143.5, 130.2 (q, *J* = 32.5 Hz), 126.3, 125.5 (q, *J* = 3.8 Hz), 124.1 (q, *J* = 272.0 Hz), 110.2, 77.2, 71.5, 26.5, 25.8;

<sup>19</sup>F NMR (565 MHz, CDCl<sub>3</sub>) δ -62.55.

The enantiomeric purity was established by HPLC analysis using a chiral column: OJ-H column, 30 °C, <sup>n</sup>Hexane/<sup>i</sup>Propanol = 97/3 as eluent, 254 nm, 1 mL/min. t<sub>R</sub> = 6.4 min (major), 6.1 min (minor).

Optical Rotation: [α]<sub>D</sub><sup>22</sup> -13.8 (c 0.2, <sup>i</sup>PrOH) for 90% ee.

Absolute stereochemistry was determined through analogy with **3cg**.



<Chromatogram>

mAU

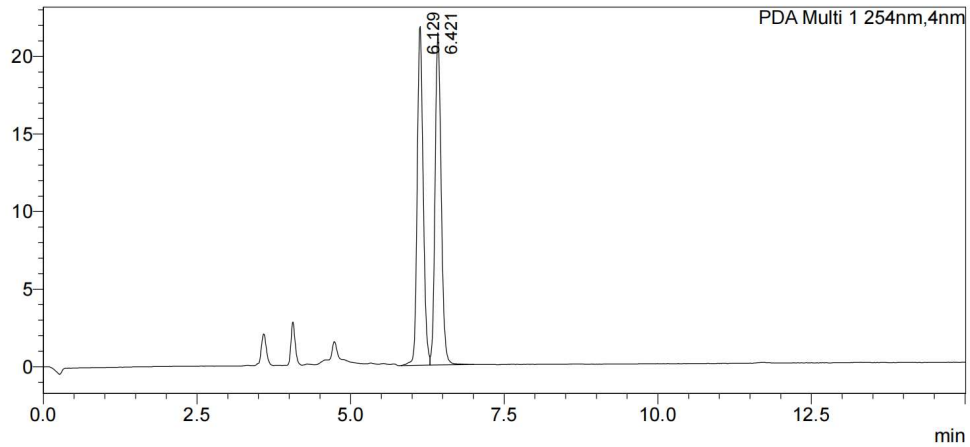

<Peak Table>

PDA Ch1 254nm

| Peak# | Ret. Time | Area   | Height | Conc.  | Unit | Mark | Name |
|-------|-----------|--------|--------|--------|------|------|------|
| 1     | 6.129     | 148004 | 21832  | 50.063 |      | M    |      |
| 2     | 6.421     | 147629 | 21404  | 49.937 |      | V M  |      |
| Total |           | 295633 | 43236  |        |      |      |      |

Supplementary Figure 7. HPLC spectrum of racemic-3cc

<Chromatogram>

mAU

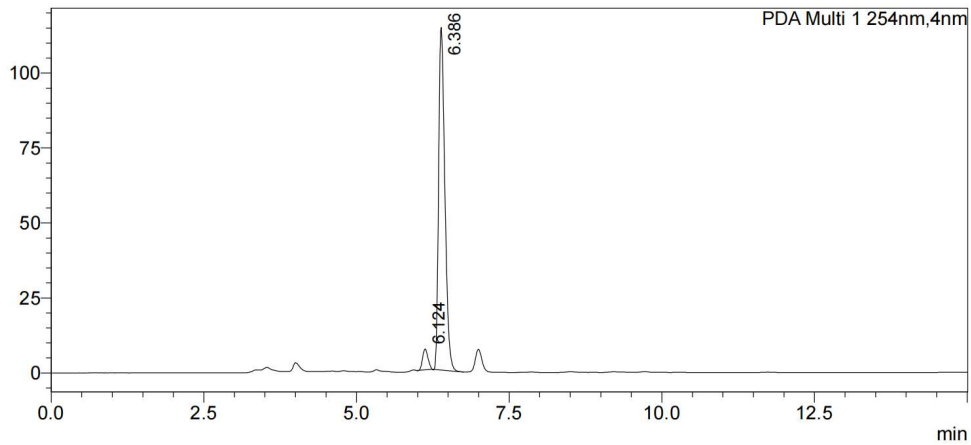

<Peak Table>

PDA Ch1 254nm

| Peak# | Ret. Time | Area   | Height | Conc.  | Unit | Mark | Name |
|-------|-----------|--------|--------|--------|------|------|------|
| 1     | 6.124     | 42694  | 6987   | 4.986  |      | M    |      |
| 2     | 6.386     | 813608 | 114233 | 95.014 |      | M    |      |
| Total |           | 856302 | 121220 |        |      |      |      |

Supplementary Figure 8. HPLC spectrum of (R)-3cc

**ethyl (*R*)-4-(2,2-dimethyl-1,3-dioxolan-4-yl)benzoate (**3cd**)**

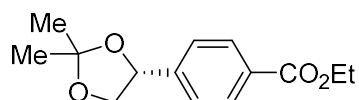

Chemical Formula: C<sub>14</sub>H<sub>18</sub>O<sub>4</sub>

Exact Mass: 250.1205

**3cd** was prepared according to general procedure **2.1** using NiBr<sub>2</sub>•dme (6.6 mg, 0.02 mmol, 10 mol%), **L6** (11.7 mg, 0.03 mmol, 15 mol%), ethyl 4-bromobenzoate (45.8 mg, 0.20 mmol, 1 equiv), 2,2-dimethyl-1,3-dioxolane (102.1 mg, 1.0 mmol, 5 equiv), TBADT (33.5 mg, 0.02 mmol, 5 mol%), K<sub>3</sub>PO<sub>4</sub> (51.2 mg, 0.24 mmol, 1.2 equiv) and anhydrous acetone/PhCF<sub>3</sub> (0.5 mL/0.5 mL) and was purified by silica gel column chromatography (PE/EA = 20/1) to obtain **3cd** as colorless oil (33.1 mg, 66% yield, 91% ee). R<sub>f</sub> = 0.5 (PE/EA = 20/1).

<sup>1</sup>H NMR (600 MHz, CDCl<sub>3</sub>) δ 8.06 – 8.01 (m, 2H), 7.45 – 7.41 (m, 2H), 5.13 (dd, *J* = 7.8, 6.3 Hz, 1H), 4.39 (q, *J* = 7.1 Hz, 2H), 4.39 – 4.32 (m, 1H), 3.69 (t, *J* = 8.0 Hz, 1H), 1.56 (s, 3H), 1.50 (s, 3H), 1.40 (t, *J* = 7.1 Hz, 3H);

<sup>13</sup>C NMR (151 MHz, CDCl<sub>3</sub>) δ 166.4, 144.4, 129.8, 125.9, 110.1, 77.4, 71.5, 61.0, 26.5, 25.9, 14.3;

HRMS: (APCI) calcd for C<sub>14</sub>H<sub>19</sub>O<sub>4</sub><sup>+</sup>[M+H]<sup>+</sup> 251.1278; found 251.1284.

The enantiomeric purity was established by HPLC analysis using a chiral column: AD-H column, 30 °C, <sup>n</sup>Hexane/<sup>i</sup>Propanol = 85/15 as eluent, 218 nm, 1 mL/min. t<sub>R</sub> = 5.2 min (major), 4.7 min (minor).

Optical Rotation: [α]<sub>D</sub><sup>21</sup> -85.3 (c 0.2, <sup>i</sup>PrOH) for 91% ee.

Absolute stereochemistry was determined through analogy with **3cg**.

<Chromatogram>

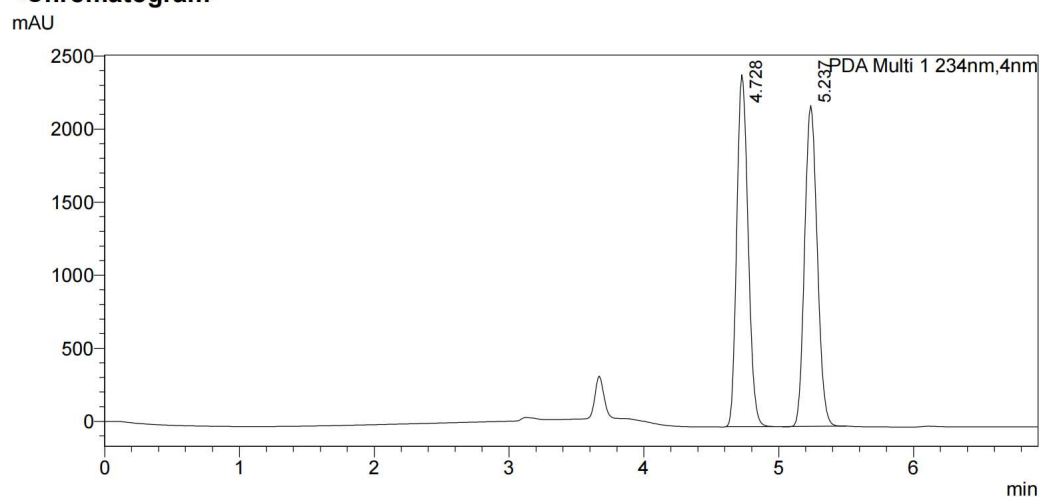

<Peak Table>

PDA Ch1 234nm

| Peak# | Ret. Time | Area     | Height  | Conc. | Unit | Mark | Name |
|-------|-----------|----------|---------|-------|------|------|------|
| 1     | 4.728     | 14113093 | 2408052 | 0.000 |      | M    |      |
| 2     | 5.237     | 14315249 | 2196427 | 0.000 |      | M    |      |
| Total |           | 28428342 | 4604479 |       |      |      |      |

Supplementary Figure 9. HPLC spectrum of racemic-3cd

<Chromatogram>

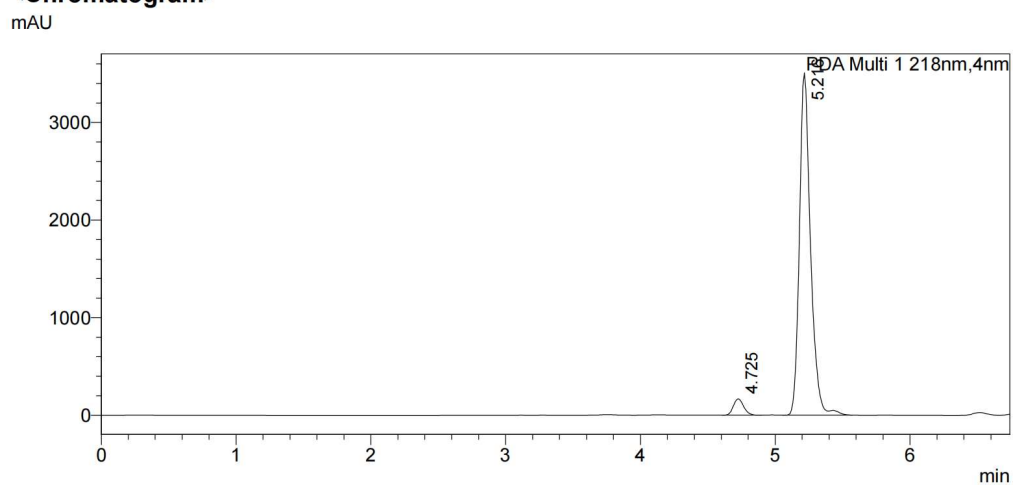

<Peak Table>

PDA Ch1 218nm

| Peak# | Ret. Time | Area     | Height  | Conc.  | Unit | Mark | Name |
|-------|-----------|----------|---------|--------|------|------|------|
| 1     | 4.725     | 890254   | 168493  | 4.236  |      | M    |      |
| 2     | 5.216     | 20126213 | 3506257 | 95.764 |      | M    |      |
| Total |           | 21016467 | 3674750 |        |      |      |      |

Supplementary Figure 10. HPLC spectrum of (R)-3cd

**(R)-4-(4-fluorophenyl)-2,2-dimethyl-1,3-dioxolane (3ce)**

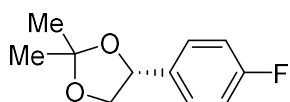

Chemical Formula: C<sub>11</sub>H<sub>13</sub>FO<sub>2</sub>

Exact Mass: 196.0900

**3ce** was prepared according to general procedure **2.1** using NiBr<sub>2</sub>•dme (6.6 mg, 0.02 mmol, 10 mol%), **L6** (11.7 mg, 0.03 mmol, 15 mol%), 1-bromo-4-fluorobenzene (35.0 mg, 0.20 mmol, 1 equiv), 2,2-dimethyl-1,3-dioxolane (102.1 mg, 1.0 mmol, 5 equiv), TBADT (33.5 mg, 0.02 mmol, 5 mol%), K<sub>3</sub>PO<sub>4</sub> (51.2 mg, 0.24 mmol, 1.2 equiv) and anhydrous acetone/PhCF<sub>3</sub> (0.5 mL/0.5 mL) and was purified by silica gel column chromatography (PE/EA = 50/1) to obtain **3ce** as colorless oil (17.9 mg, 47% yield, 84% ee). R<sub>f</sub> = 0.6 (PE/EA = 50/1).

<sup>1</sup>H NMR (600 MHz, CDCl<sub>3</sub>) δ 7.38 – 7.31 (m, 2H), 7.08 – 6.99 (m, 2H), 5.05 (dd, *J* = 8.0, 6.2 Hz, 1H), 4.29 (dd, *J* = 8.2, 6.2 Hz, 1H), 3.67 (t, *J* = 8.1 Hz, 1H), 1.55 (s, 3H), 1.48 (s, 3H);

<sup>13</sup>C NMR (151 MHz, CDCl<sub>3</sub>) δ 162.6 (d, *J* = 246.2 Hz), 134.8 (d, *J* = 3.2 Hz), 128.0 (d, *J* = 8.2 Hz), 115.5 (d, *J* = 21.5 Hz), 109.8, 77.4, 71.7, 26.6, 25.9;

<sup>19</sup>F NMR (565 MHz, CDCl<sub>3</sub>) δ -114.3.

HRMS: (ESI) calcd for C<sub>11</sub>H<sub>13</sub>FO<sub>2</sub>Na<sup>+</sup>[M+Na]<sup>+</sup> 219.0792; found 219.0790.

The enantiomeric purity was established by HPLC analysis using a chiral column: IA-H column, 30 °C, <sup>n</sup>Hexane/<sup>i</sup>Propanol = 99/1 as eluent, 264 nm, 0.5 mL/min. t<sub>R</sub> = 9.6 min (major), 9.1 min (minor).

Optical Rotation: [α]<sub>D</sub><sup>26</sup> 3.1 (c 0.1, <sup>i</sup>PrOH) for 84% ee.

Absolute stereochemistry was determined through analogy with **3cg**.

<Chromatogram>

mAU

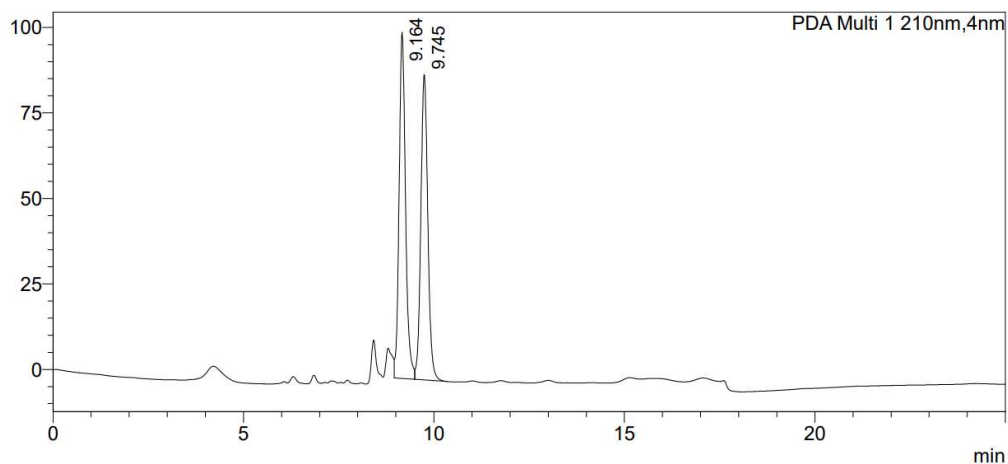

<Peak Table>

PDA Ch1 210nm

| Peak# | Ret. Time | Area    | Height | Conc. | Unit | Mark | Name |
|-------|-----------|---------|--------|-------|------|------|------|
| 1     | 9.164     | 1186724 | 101221 | 0.000 |      | M    |      |
| 2     | 9.745     | 1138413 | 89266  | 0.000 |      | V M  |      |
| Total |           | 2325137 | 190486 |       |      |      |      |

Supplementary Figure 11. HPLC spectrum of racemic-3ce

<Chromatogram>

mAU

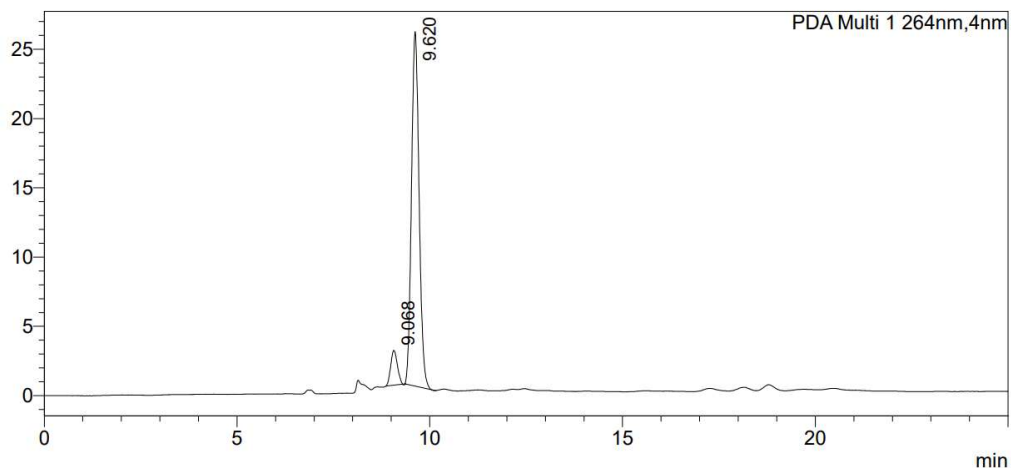

<Peak Table>

PDA Ch1 264nm

| Peak# | Ret. Time | Area   | Height | Conc.  | Unit | Mark | Name |
|-------|-----------|--------|--------|--------|------|------|------|
| 1     | 9.068     | 30009  | 2512   | 7.891  |      | M    |      |
| 2     | 9.620     | 350268 | 25584  | 92.109 |      | M    |      |
| Total |           | 380277 | 28096  |        |      |      |      |

Supplementary Figure 12. HPLC spectrum of (R)-3ce

**(R)-4-(4-chlorophenyl)-2,2-dimethyl-1,3-dioxolane (3cf)**

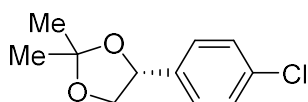

Chemical Formula: C<sub>11</sub>H<sub>13</sub>ClO<sub>2</sub>

Exact Mass: 212.0604

**3cf** was prepared according to general procedure **2.1** using NiBr<sub>2</sub>•dme (6.6 mg, 0.02 mmol, 10 mol%), **L6** (11.7 mg, 0.03 mmol, 15 mol%), 1-bromo-4-chlorobenzene (38.2 mg, 0.20 mmol, 1 equiv), 2,2-dimethyl-1,3-dioxolane (102.1 mg, 1.0 mmol, 5 equiv), TBADT (33.5 mg, 0.02 mmol, 5 mol%), K<sub>3</sub>PO<sub>4</sub> (51.2 mg, 0.24 mmol, 1.2 equiv) and anhydrous acetone/PhCF<sub>3</sub> (0.5 mL/0.5 mL) and was purified by silica gel column chromatography (PE/EA = 50/1) to obtain **3cf** as colorless oil (27.5 mg, 65% yield, 91% ee). R<sub>f</sub> = 0.6 (PE/EA = 50/1).

The NMR data matched those reported in the literature.<sup>3</sup>

<sup>1</sup>H NMR (600 MHz, CDCl<sub>3</sub>) δ 7.35 – 7.28 (m, 4H), 5.05 (dd, *J* = 7.9, 6.2 Hz, 1H), 4.30 (dd, *J* = 8.2, 6.2 Hz, 1H), 3.66 (t, *J* = 8.1 Hz, 1H), 1.56 (s, 3H), 1.48 (s, 3H);

<sup>13</sup>C NMR (151 MHz, CDCl<sub>3</sub>) δ 137.8, 133.8, 128.7, 127.5, 109.9, 77.3, 71.6, 26.6, 25.9;

The enantiomeric purity was established by HPLC analysis using a chiral column: IA-H column, 30 °C, <sup>n</sup>Hexane/<sup>i</sup>Propanol = 99/1 as eluent, 202 nm, 0.5 mL/min. t<sub>R</sub> = 10.9 min (major), 9.8 min (minor).

Optical Rotation: [α]<sub>D</sub><sup>21</sup> -42.6 (c 0.2, <sup>i</sup>PrOH) for 91% ee.

Absolute stereochemistry was determined through analogy with **3cg**.

<Chromatogram>

mAU

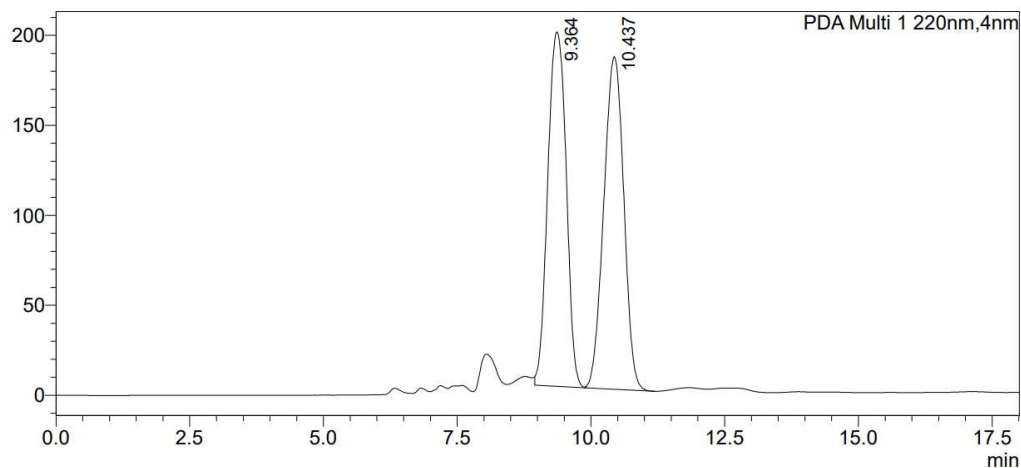

<Peak Table>

PDA Ch1 220nm

| Peak# | Ret. Time | Area    | Height | Conc. | Unit | Mark | Name |
|-------|-----------|---------|--------|-------|------|------|------|
| 1     | 9.364     | 4720241 | 196939 | 0.000 |      | M    |      |
| 2     | 10.437    | 4807814 | 184770 | 0.000 |      | V M  |      |
| Total |           | 9528054 | 381710 |       |      |      |      |

Supplementary Figure 13. HPLC spectrum of racemic-3cf

<Chromatogram>

mAU

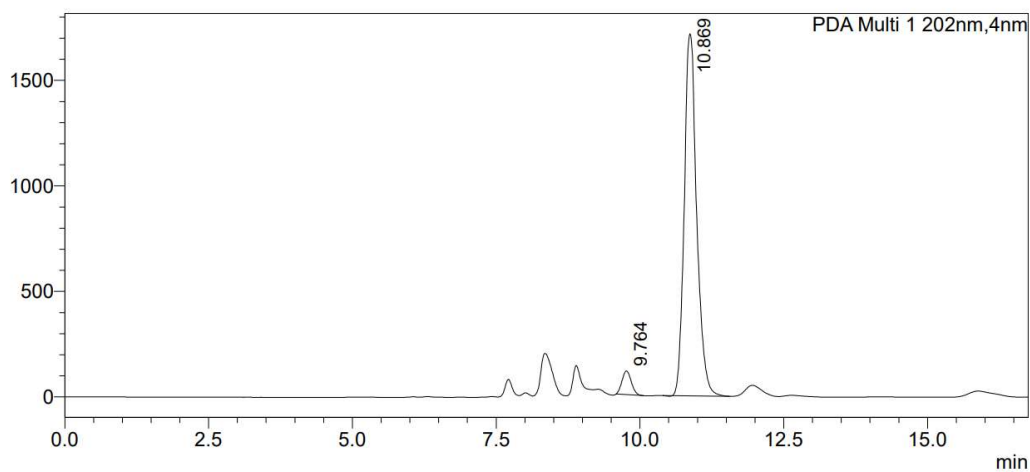

<Peak Table>

PDA Ch1 202nm

| Peak# | Ret. Time | Area     | Height  | Conc.  | Unit | Mark | Name |
|-------|-----------|----------|---------|--------|------|------|------|
| 1     | 9.764     | 1246022  | 111660  | 4.613  |      | M    |      |
| 2     | 10.869    | 25764463 | 1715899 | 95.387 |      | M    |      |
| Total |           | 27010485 | 1827560 |        |      |      |      |

Supplementary Figure 14. HPLC spectrum of (R)-3cf

**(R)-2,2-dimethyl-4-(4-(methylsulfonyl)phenyl)-1,3-dioxolane (3cg)**

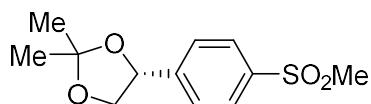

Chemical Formula: C<sub>12</sub>H<sub>16</sub>O<sub>4</sub>S

Exact Mass: 256.0769

**3cg** was prepared according to general procedure **2.1** using NiBr<sub>2</sub>•dme (6.6 mg, 0.02 mmol, 10 mol%), **L6** (11.7 mg, 0.03 mmol, 15 mol%), 1-bromo-4-(methylsulfonyl)benzene (47.2 mg, 0.20 mmol, 1 equiv), 2,2-dimethyl-1,3-dioxolane (102.1 mg, 1.0 mmol, 5 equiv), TBADT (33.5 mg, 0.02 mmol, 5 mol%), K<sub>3</sub>PO<sub>4</sub> (51.2 mg, 0.24 mmol, 1.2 equiv) and anhydrous acetone/PhCF<sub>3</sub> (0.5 mL/0.5 mL) and was purified by silica gel column chromatography (PE/EA = 4/1) to obtain **3cg** as white solid (35.8 mg, 70% yield, 93% ee). R<sub>f</sub> = 0.3 (PE/EA = 5/1).

<sup>1</sup>H NMR (600 MHz, CDCl<sub>3</sub>) δ 7.97 – 7.92 (m, 2H), 7.59 – 7.55 (m, 2H), 5.16 (t, *J* = 7.0 Hz, 1H), 4.39 (dd, *J* = 8.3, 6.4 Hz, 1H), 3.70 (t, *J* = 7.9 Hz, 1H), 3.05 (s, 3H), 1.56 (s, 3H), 1.50 (s, 3H);

<sup>13</sup>C NMR (151 MHz, CDCl<sub>3</sub>) δ 146.1, 140.1, 127.7, 126.9, 110.5, 77.0, 71.4, 44.6, 26.5, 25.8;

HRMS: (APCI) calcd for C<sub>12</sub>H<sub>17</sub>O<sub>4</sub>S<sup>+</sup>[M+H]<sup>+</sup> 257.0842; found 257.0849.

The enantiomeric purity was established by HPLC analysis using a chiral column: AD-H column, 30 °C, <sup>n</sup>Hexane/<sup>i</sup>Propanol = 70/30 as eluent, 204 nm, 1 mL/min. t<sub>R</sub> = 6.8 min (major), 7.5 min (minor).

Optical Rotation: [α]<sub>D</sub><sup>21</sup> -23.0 (c 0.2, <sup>i</sup>PrOH) for 93% ee.

Absolute stereochemistry was determined by X-ray crystallography analysis.



<Chromatogram>

mAU

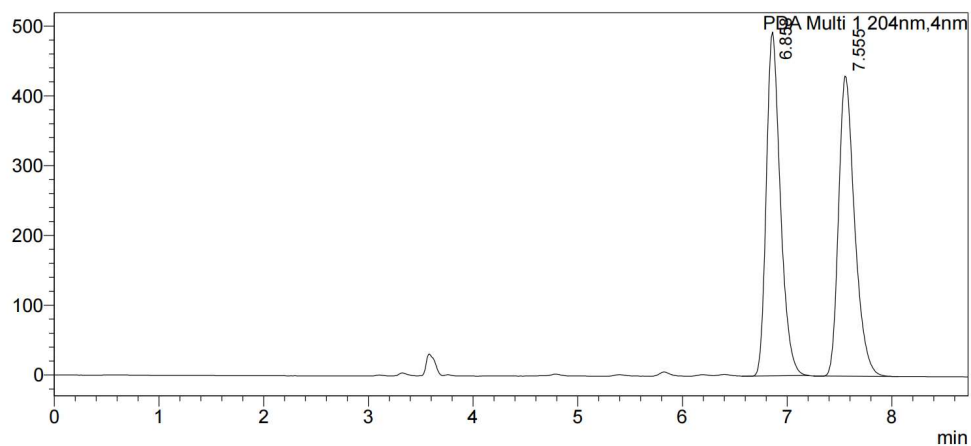

<Peak Table>

PDA Ch1 204nm

| Peak# | Ret. Time | Area    | Height | Conc. | Unit | Mark | Name |
|-------|-----------|---------|--------|-------|------|------|------|
| 1     | 6.858     | 4581672 | 492564 | 0.000 |      | M    |      |
| 2     | 7.555     | 4579468 | 430296 | 0.000 |      | M    |      |
| Total |           | 9161140 | 922860 |       |      |      |      |

Supplementary Figure 15. HPLC spectrum of racemic-3cg

<Chromatogram>

mAU

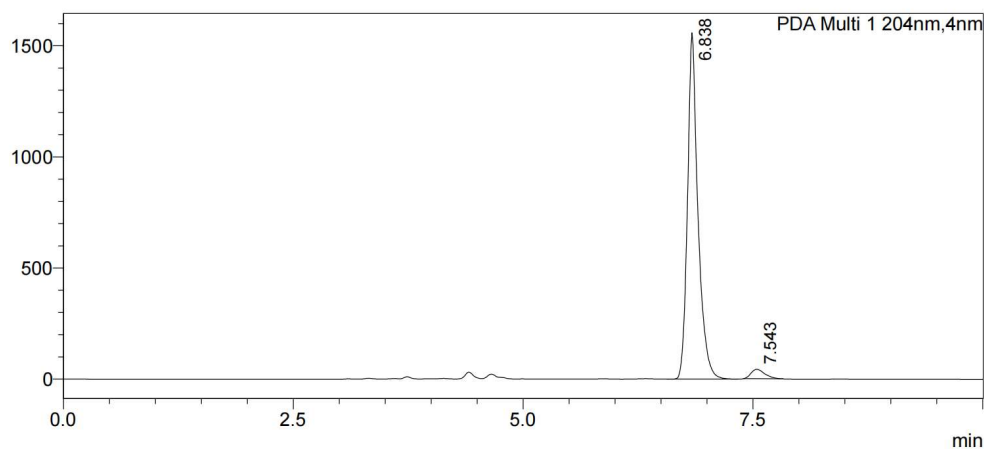

<Peak Table>

PDA Ch1 204nm

| Peak# | Ret. Time | Area     | Height  | Conc. | Unit | Mark | Name |
|-------|-----------|----------|---------|-------|------|------|------|
| 1     | 6.838     | 12316719 | 1558353 | 0.000 |      | M    |      |
| 2     | 7.543     | 442298   | 42609   | 0.000 |      | M    |      |
| Total |           | 12759016 | 1600962 |       |      |      |      |

Supplementary Figure 16. HPLC spectrum of (R)-3cg

**(R)-2-(4-(2,2-dimethyl-1,3-dioxolan-4-yl)phenyl)-4,4,5,5-tetramethyl-1,3,2-dioxaborolane**

**(3ch)**

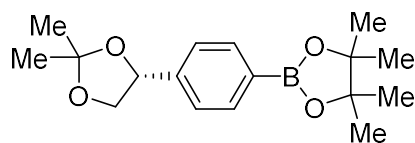

Chemical Formula:  $C_{17}H_{25}BO_4$

Exact Mass: 304.1846

**3ch** was prepared according to general procedure **2.1** using  $NiBr_2 \cdot dme$  (6.6 mg, 0.02 mmol, 10 mol%), **L6** (11.7 mg, 0.03 mmol, 15 mol%), 2-(4-bromophenyl)-4,4,5,5-tetramethyl-1,3,2-dioxaborolane (56.6 mg, 0.20 mmol, 1 equiv), 2,2-dimethyl-1,3-dioxolane (102.1 mg, 1.0 mmol, 5 equiv), TBADT (33.5 mg, 0.02 mmol, 5 mol%),  $K_3PO_4$  (51.2 mg, 0.24 mmol, 1.2 equiv) and anhydrous acetone/ $PhCF_3$  (0.5 mL/0.5 mL) and was purified by silica gel column chromatography (PE/EA = 10/1) to obtain **3ch** as colorless oil (34.0 mg, 58% yield, 88% ee).  $R_f = 0.6$  (PE/EA = 10/1).

The NMR data matched those reported in the patent.<sup>4</sup>

$^1H$  NMR (600 MHz,  $CDCl_3$ )  $\delta$  7.83 – 7.77 (m, 2H), 7.39 – 7.34 (m, 2H), 5.09 (dd,  $J = 8.0, 6.3$  Hz, 1H), 4.31 (dd,  $J = 8.2, 6.3$  Hz, 1H), 3.68 (t,  $J = 8.1$  Hz, 1H), 1.55 (s, 3H), 1.49 (s, 3H), 1.34 (s, 12H);

$^{13}C$  NMR (151 MHz,  $CDCl_3$ )  $\delta$  142.3, 135.0, 125.4, 109.9, 83.8, 77.9, 71.6, 26.6, 26.0, 24.89, 24.87;

The enantiomeric purity was established by HPLC analysis using a chiral column: OJ-H column, 30 °C,  $^n$ Hexane/ $^i$ Propanol = 90/10 as eluent, 201 nm, 1 mL/min.  $t_R = 5.5$  min (major),  $t_R = 4.5$  min (minor).

Optical Rotation:  $[\alpha]_D^{21} -74.6$  (c 0.1,  $^i$ PrOH) for 88% ee.

Absolute stereochemistry was determined through analogy with **3cg**.

<Chromatogram>

mAU

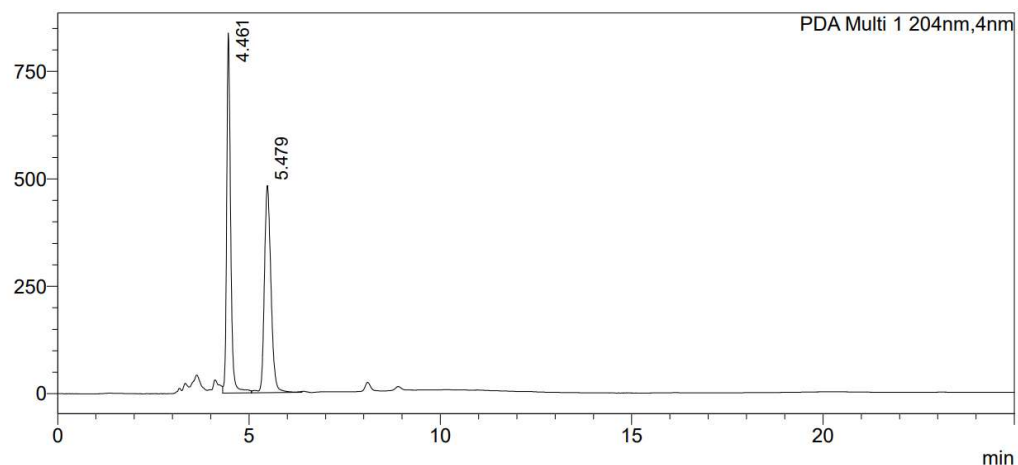

<Peak Table>

PDA Ch1 204nm

| Peak# | Ret. Time | Area     | Height  | Conc. | Unit | Mark | Name |
|-------|-----------|----------|---------|-------|------|------|------|
| 1     | 4.461     | 5992477  | 837671  | 0.000 |      | M    |      |
| 2     | 5.479     | 5768843  | 481910  | 0.000 |      | V M  |      |
| Total |           | 11761320 | 1319580 |       |      |      |      |

Supplementary Figure 17. HPLC spectrum of racemic-3ch

<Chromatogram>

mAU

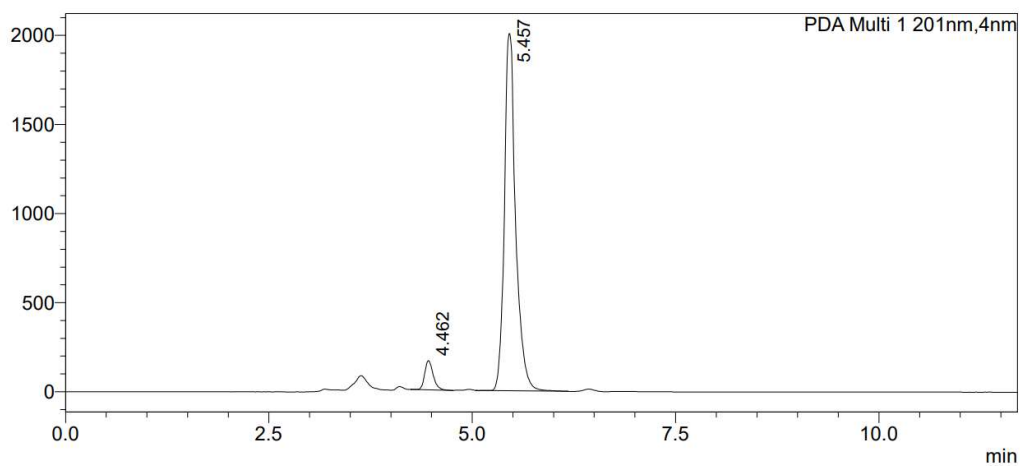

<Peak Table>

PDA Ch1 201nm

| Peak# | Ret. Time | Area     | Height  | Conc. | Unit | Mark | Name |
|-------|-----------|----------|---------|-------|------|------|------|
| 1     | 4.462     | 1186247  | 163986  | 0.000 |      | M    |      |
| 2     | 5.457     | 19348925 | 2005110 | 0.000 |      | M    |      |
| Total |           | 20535172 | 2169096 |       |      |      |      |

Supplementary Figure 18. HPLC spectrum of (R)-3ch

**(R)-2,2-dimethyl-4-(4-(trifluoromethoxy)phenyl)-1,3-dioxolane (3ci)**

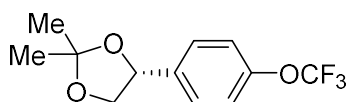

Chemical Formula: C<sub>12</sub>H<sub>13</sub>F<sub>3</sub>O<sub>3</sub>

Exact Mass: 262.0817

**3ci** was prepared according to general procedure **2.1** using NiBr<sub>2</sub>•dme (6.6 mg, 0.02 mmol, 10 mol%), **L6** (11.7 mg, 0.03 mmol, 15 mol%), 1-bromo-4-(trifluoromethoxy)benzene (48.2 mg, 0.20 mmol, 1 equiv), 2,2-dimethyl-1,3-dioxolane (102.1 mg, 1.0 mmol, 5 equiv), TBADT (33.5 mg, 0.02 mmol, 5 mol%), K<sub>3</sub>PO<sub>4</sub> (51.2 mg, 0.24 mmol, 1.2 equiv) and anhydrous acetone/PhCF<sub>3</sub> (0.5 mL/0.5 mL) and was purified by silica gel column chromatography (PE/EA = 50/1) to obtain **3ci** as colorless oil (28.8 mg, 55% yield, 88% ee). R<sub>f</sub> = 0.6 (PE/EA = 50/1).

<sup>1</sup>H NMR (600 MHz, CDCl<sub>3</sub>) δ 7.42 – 7.37 (m, 2H), 7.23 – 7.18 (m, 2H), 5.07 (dd, *J* = 7.8, 6.2 Hz, 1H), 4.31 (dd, *J* = 8.3, 6.3 Hz, 1H), 3.69 (t, *J* = 8.1 Hz, 1H), 1.55 (s, 3H), 1.48 (s, 3H);

<sup>13</sup>C NMR (151 MHz, CDCl<sub>3</sub>) δ 148.9 (q, *J* = 2.1 Hz), 138.0, 127.6, 121.1, 120.5 (q, *J* = 257.1 Hz), 110.0, 77.2, 71.6, 26.6, 25.8;

<sup>19</sup>F NMR (565 MHz, CDCl<sub>3</sub>) δ -57.92.

HRMS: (ESI) calcd for C<sub>12</sub>H<sub>13</sub>F<sub>3</sub>O<sub>3</sub>Na<sup>+</sup>[M+Na]<sup>+</sup> 285.0709; found 285.0703.

The enantiomeric purity was established by HPLC analysis using a chiral column: OJ-H column, 30 °C, <sup>n</sup>Hexane/<sup>i</sup>Propanol = 99/1 as eluent, 204 nm, 0.5 mL/min. t<sub>R</sub> = 16.9 min (major), 14.4 min (minor).

Optical Rotation: [α]<sub>D</sub><sup>21</sup> -66.5 (c 0.1, <sup>i</sup>PrOH) for 88% ee.

Absolute stereochemistry was determined through analogy with **3cg**.

<Chromatogram>

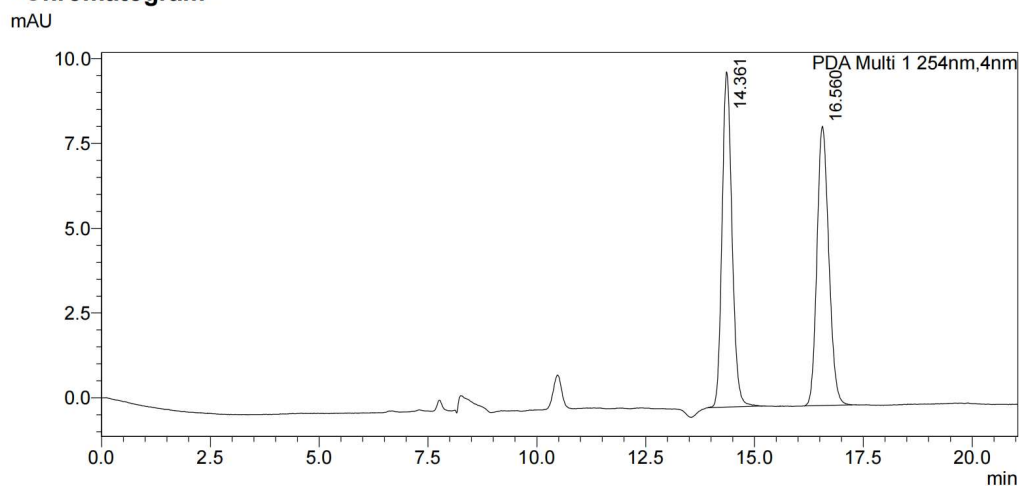

<Peak Table>

PDA Ch1 254nm

| Peak# | Ret. Time | Area   | Height | Conc. | Unit | Mark | Name |
|-------|-----------|--------|--------|-------|------|------|------|
| 1     | 14.361    | 156999 | 9884   | 0.000 |      | M    |      |
| 2     | 16.560    | 155577 | 8229   | 0.000 |      |      |      |
| Total |           | 312577 | 18112  |       |      |      |      |

Supplementary Figure 19. HPLC spectrum of racemic-3ci

<Chromatogram>

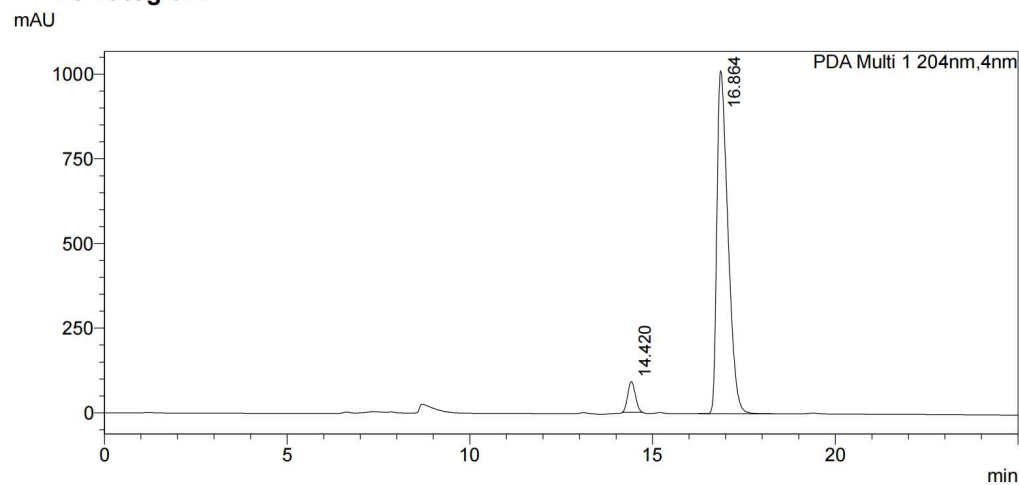

<Peak Table>

PDA Ch1 204nm

| Peak# | Ret. Time | Area     | Height  | Conc. | Unit | Mark | Name |
|-------|-----------|----------|---------|-------|------|------|------|
| 1     | 14.420    | 1310220  | 90681   | 0.000 |      | M    |      |
| 2     | 16.864    | 21358591 | 1013041 | 0.000 |      | M    |      |
| Total |           | 22668811 | 1103722 |       |      |      |      |

Supplementary Figure 20. HPLC spectrum of (R)-3ci

**(R)-3-(4-(2,2-dimethyl-1,3-dioxolan-4-yl)phenoxy)propanenitrile (3cj)**

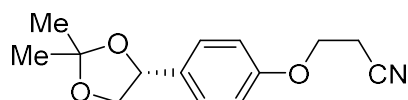

Chemical Formula: C<sub>14</sub>H<sub>17</sub>NO<sub>3</sub>

Exact Mass: 247.1208

**3cj** was prepared according to general procedure **2.1** using NiBr<sub>2</sub>•dme (6.6 mg, 0.02 mmol, 10 mol%), **L6** (11.7 mg, 0.03 mmol, 15 mol%), 3-(4-bromophenoxy)propanenitrile (45.2 mg, 0.20 mmol, 1 equiv), 2,2-dimethyl-1,3-dioxolane (102.1 mg, 1.0 mmol, 5 equiv), TBADT (33.5 mg, 0.02 mmol, 5 mol%), K<sub>3</sub>PO<sub>4</sub> (51.2 mg, 0.24 mmol, 1.2 equiv) and anhydrous acetone/PhCF<sub>3</sub> (0.5 mL/0.5 mL) and was purified by silica gel column chromatography (PE/EA = 5/1) to obtain **3cj** as colorless oil (28.2 mg, 57% yield, 88% ee). R<sub>f</sub> = 0.5 (PE/EA = 4/1).

<sup>1</sup>H NMR (600 MHz, CDCl<sub>3</sub>) δ 7.35 – 7.28 (m, 2H), 6.92 – 6.87 (m, 2H), 5.02 (dd, *J* = 8.1, 6.1 Hz, 1H), 4.26 (dd, *J* = 8.2, 6.1 Hz, 1H), 4.19 (t, *J* = 6.4 Hz, 2H), 3.68 (t, *J* = 8.2 Hz, 1H), 2.82 (t, *J* = 6.4 Hz, 2H), 1.54 (s, 3H), 1.47 (s, 3H);

<sup>13</sup>C NMR (151 MHz, CDCl<sub>3</sub>) δ 157.6, 132.3, 127.8, 117.1, 114.8, 109.6, 77.6, 71.7, 62.7, 26.7, 26.0, 18.6;

HRMS: (ESI) calcd for C<sub>14</sub>H<sub>17</sub>O<sub>3</sub>Na<sup>+</sup>[M+Na]<sup>+</sup> 270.1101; found 270.1102.

The enantiomeric purity was established by HPLC analysis using a chiral column: AD-H column, 30 °C, <sup>n</sup>Hexane/<sup>i</sup>Propanol = 85/15 as eluent, 194 nm, 1 mL/min. t<sub>R</sub> = 9.6 min (major), 8.4 min (minor).

Optical Rotation: [α]<sub>D</sub><sup>21</sup> -34.2 (c 0.1, <sup>i</sup>PrOH) for 88% ee.

Absolute stereochemistry was determined through analogy with **3cg**.

<Chromatogram>

mAU

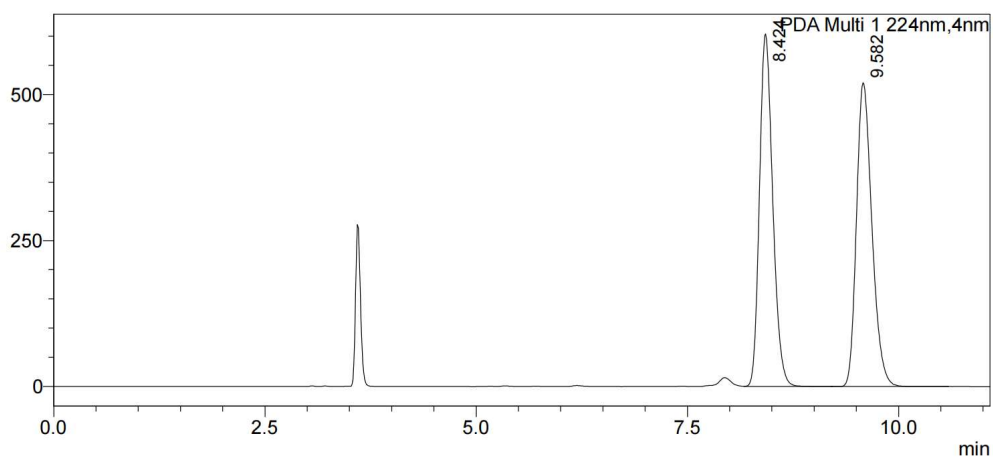

<Peak Table>

PDA Ch1 224nm

| Peak# | Ret. Time | Area     | Height  | Conc. | Unit | Mark | Name |
|-------|-----------|----------|---------|-------|------|------|------|
| 1     | 8.424     | 6632110  | 604114  | 0.000 |      |      |      |
| 2     | 9.582     | 6646896  | 520481  | 0.000 |      | V    |      |
| Total |           | 13279007 | 1124595 |       |      |      |      |

Supplementary Figure 21. HPLC spectrum of racemic-3cj

<Chromatogram>

mAU

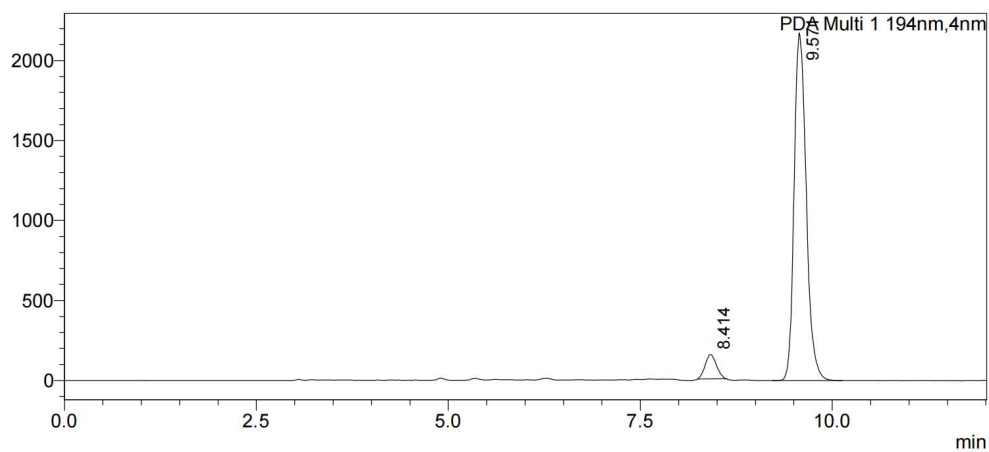

<Peak Table>

PDA Ch1 194nm

| Peak# | Ret. Time | Area     | Height  | Conc.  | Unit | Mark | Name |
|-------|-----------|----------|---------|--------|------|------|------|
| 1     | 8.414     | 1556851  | 152582  | 6.133  |      | M    |      |
| 2     | 9.571     | 23829928 | 2173228 | 93.867 |      | M    |      |
| Total |           | 25386779 | 2325810 |        |      |      |      |

Supplementary Figure 22. HPLC spectrum of (R)-3cj

**(R)-4-([1,1'-biphenyl]-4-yl)-2,2-dimethyl-1,3-dioxolane (3ck)**

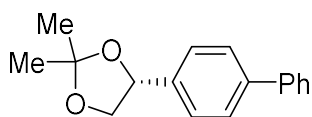

Chemical Formula: C<sub>17</sub>H<sub>18</sub>O<sub>2</sub>

Exact Mass: 254.1307

**3ck** was prepared according to general procedure **2.1** using NiBr<sub>2</sub>•dme (6.6 mg, 0.02 mmol, 10 mol%), **L6** (11.7 mg, 0.03 mmol, 15 mol%), 4-bromo-1,1'-biphenyl (46.6 mg, 0.20 mmol, 1 equiv), 2,2-dimethyl-1,3-dioxolane (102.1 mg, 1.0 mmol, 5 equiv), TBADT (33.5 mg, 0.02 mmol, 5 mol%), K<sub>3</sub>PO<sub>4</sub> (51.2 mg, 0.24 mmol, 1.2 equiv) and anhydrous acetone/PhCF<sub>3</sub> (0.5 mL/0.5 mL) and was purified by silica gel column chromatography (PE/EA = 50/1) to obtain **3ck** as colorless oil (25.9 mg, 51% yield, 87% ee). R<sub>f</sub> = 0.6 (PE/EA = 50/1).

<sup>1</sup>H NMR (400 MHz, CDCl<sub>3</sub>) δ 7.65 – 7.54 (m, 4H), 7.44 (dd, *J* = 7.9, 5.8 Hz, 4H), 7.39 – 7.32 (m, 1H), 5.13 (dd, *J* = 8.1, 6.2 Hz, 1H), 4.34 (dd, *J* = 8.2, 6.2 Hz, 1H), 3.77 (t, *J* = 8.1 Hz, 1H), 1.58 (s, 3H), 1.51 (s, 3H);

<sup>13</sup>C NMR (101 MHz, CDCl<sub>3</sub>) δ 141.0, 140.8, 138.0, 128.8, 127.34, 127.30, 127.1, 126.7, 109.8, 77.7, 71.6, 26.6, 26.0;

HRMS: (ESI) calcd for C<sub>17</sub>H<sub>18</sub>O<sub>2</sub>Na<sup>+</sup>[M+Na]<sup>+</sup> 277.1199; found 277.1201.

The enantiomeric purity was established by HPLC analysis using a chiral column: OD-H column, 30 °C, <sup>n</sup>Hexane/<sup>i</sup>Propanol = 95/5 as eluent, 224 nm, 1 mL/min. t<sub>R</sub> = 5.7 min (major), 5.1 min (minor).

Optical Rotation: [α]<sub>D</sub><sup>21</sup> -9.3 (c 0.1, <sup>i</sup>PrOH) for 87% ee.

Absolute stereochemistry was determined through analogy with **3cg**.



<Chromatogram>

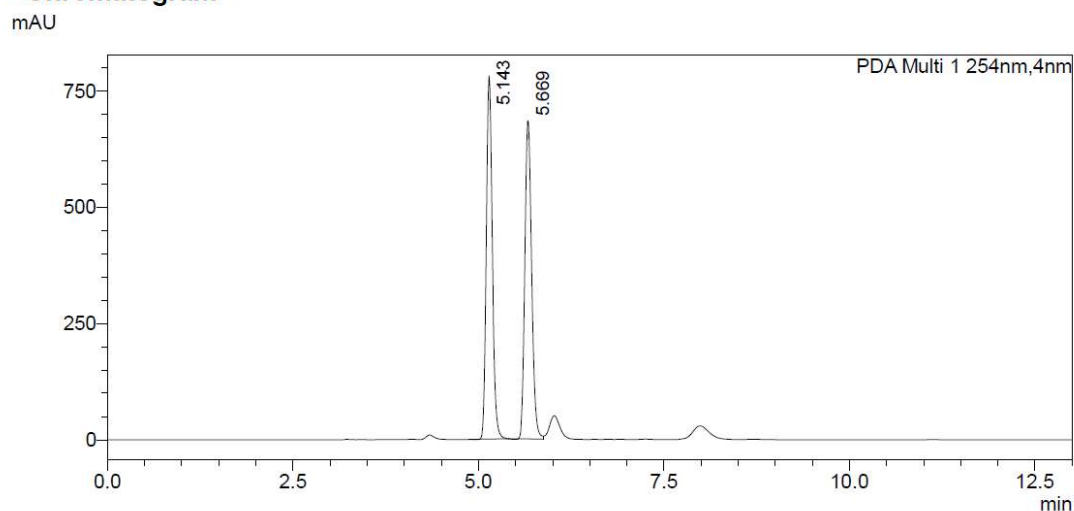

<Peak Table>

PDA Ch1 254nm

| Peak# | Ret. Time | Area    | Height  | Conc. | Unit | Mark | Name |
|-------|-----------|---------|---------|-------|------|------|------|
| 1     | 5.143     | 4421879 | 781757  | 0.000 |      | M    |      |
| 2     | 5.669     | 4336987 | 684667  | 0.000 |      | M    |      |
| Total |           | 8758866 | 1466423 |       |      |      |      |

Supplementary Figure 23. HPLC spectrum of racemic-3ck

<Chromatogram>

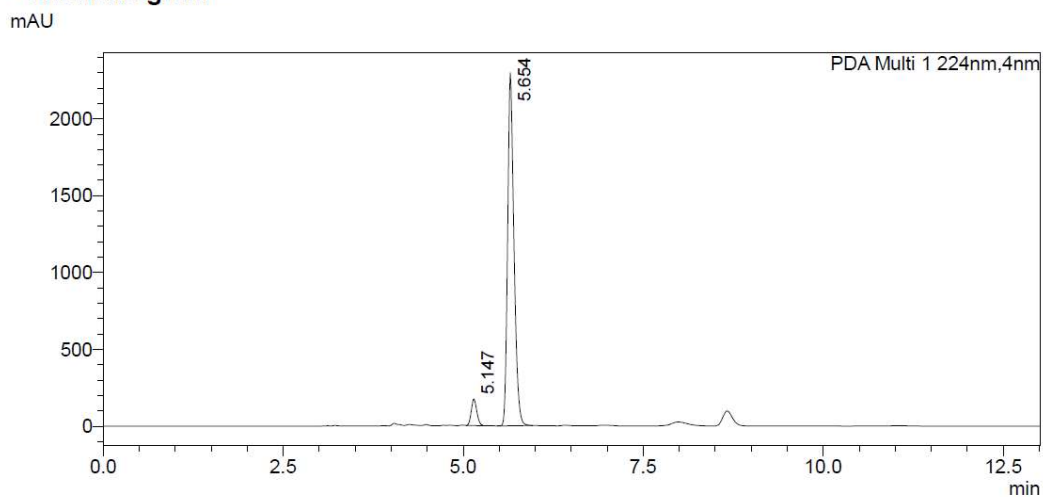

<Peak Table>

PDA Ch1 224nm

| Peak# | Ret. Time | Area     | Height  | Conc. | Unit | Mark | Name |
|-------|-----------|----------|---------|-------|------|------|------|
| 1     | 5.147     | 943643   | 171998  | 0.000 |      | M    |      |
| 2     | 5.654     | 13839170 | 2296924 | 0.000 |      | M    |      |
| Total |           | 14782813 | 2468921 |       |      |      |      |

Supplementary Figure 24. HPLC spectrum of (R)-3ck

**(R)-4-(3-chlorophenyl)-2,2-dimethyl-1,3-dioxolane (3cl)**

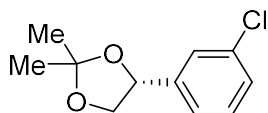

Chemical Formula: C<sub>11</sub>H<sub>13</sub>ClO<sub>2</sub>

Exact Mass: 212.0604

**3cl** was prepared according to general procedure **2.1** using NiBr<sub>2</sub>•dme (6.6 mg, 0.02 mmol, 10 mol%), **L6** (11.7 mg, 0.03 mmol, 15 mol%), 1-bromo-3-chlorobenzene (38.2 mg, 0.20 mmol, 1 equiv), 2,2-dimethyl-1,3-dioxolane (102.1 mg, 1.0 mmol, 5 equiv), TBADT (33.5 mg, 0.02 mmol, 5 mol%), K<sub>3</sub>PO<sub>4</sub> (51.2 mg, 0.24 mmol, 1.2 equiv) and anhydrous acetone/PhCF<sub>3</sub> (0.5 mL/0.5 mL) and was purified by silica gel column chromatography (PE/EA = 50/1) to obtain **3cl** as colorless oil (27.1 mg, 64% yield, 89% ee). R<sub>f</sub> = 0.6 (PE/EA = 50/1).

The NMR data matched those reported in the patent.<sup>5</sup>

<sup>1</sup>H NMR (600 MHz, CDCl<sub>3</sub>) δ 7.37 (d, *J* = 2.1 Hz, 1H), 7.30 – 7.25 (m, 2H), 7.25 – 7.21 (m, 1H), 5.04 (dd, *J* = 7.8, 6.3 Hz, 1H), 4.31 (dd, *J* = 8.3, 6.3 Hz, 1H), 3.68 (t, *J* = 8.0 Hz, 1H), 1.55 (s, 3H), 1.48 (s, 3H);

<sup>13</sup>C NMR (151 MHz, CDCl<sub>3</sub>) δ 141.4, 134.5, 129.8, 128.2, 126.3, 124.3, 110.1, 77.2, 71.5, 26.5, 25.9;

The enantiomeric purity was established by HPLC analysis using a chiral column: OJ-H column, 30 °C, <sup>n</sup>Hexane/<sup>i</sup>Propanol = 97/3 as eluent, 204 nm, 1 mL/min. t<sub>R</sub> = 8.3 min (major), 10.5 min (minor).

Optical Rotation: [α]<sub>D</sub><sup>21</sup> -87.3 (c 0.1, <sup>i</sup>PrOH) for 89% ee.

Absolute stereochemistry was determined through analogy with **3cg**.

<Chromatogram>

mAU

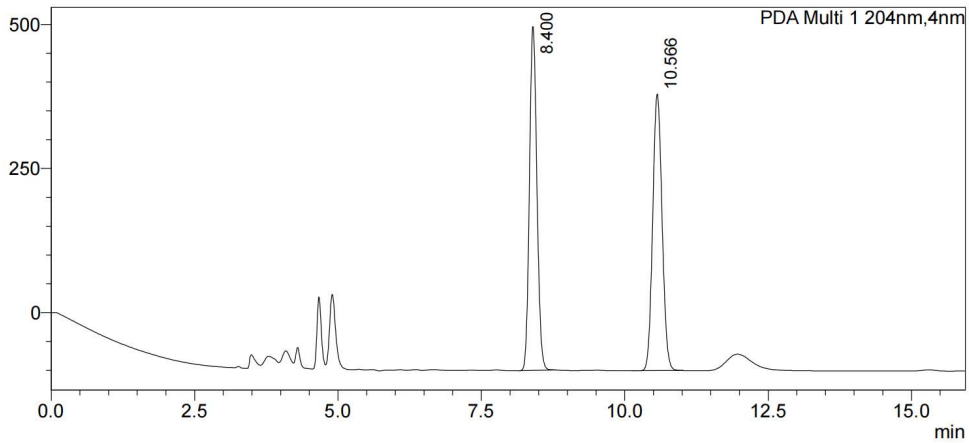

<Peak Table>

PDA Ch1 204nm

| Peak# | Ret. Time | Area     | Height  | Conc. | Unit | Mark | Name |
|-------|-----------|----------|---------|-------|------|------|------|
| 1     | 8.400     | 5411880  | 596292  | 0.000 |      | M    |      |
| 2     | 10.566    | 5464186  | 479835  | 0.000 |      | M    |      |
| Total |           | 10876066 | 1076127 |       |      |      |      |

Supplementary Figure 25. HPLC spectrum of racemic-3cl

<Chromatogram>

mAU

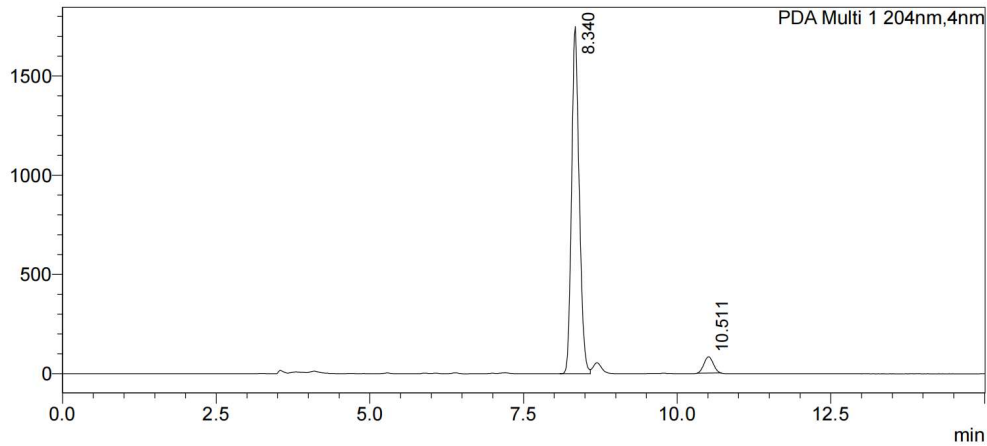

<Peak Table>

PDA Ch1 204nm

| Peak# | Ret. Time | Area     | Height  | Conc.  | Unit | Mark | Name |
|-------|-----------|----------|---------|--------|------|------|------|
| 1     | 8.340     | 15108454 | 1747968 | 94.614 |      | M    |      |
| 2     | 10.511    | 860128   | 81625   | 5.386  |      | M    |      |
| Total |           | 15968582 | 1829592 |        |      |      |      |

Supplementary Figure 26. HPLC spectrum of (R)-3cl

**(R)-3-(2,2-dimethyl-1,3-dioxolan-4-yl)phenyl acetate (3cm)**

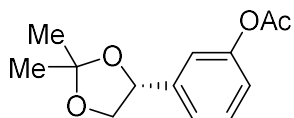

Chemical Formula: C<sub>13</sub>H<sub>16</sub>O<sub>4</sub>

Exact Mass: 236.1049

**3cm** was prepared according to general procedure **2.1** using NiBr<sub>2</sub>•dme (6.6 mg, 0.02 mmol, 10 mol%), **L6** (11.7 mg, 0.03 mmol, 15 mol%), 3-bromophenyl acetate (43.0 mg, 0.20 mmol, 1 equiv), 2,2-dimethyl-1,3-dioxolane (102.1 mg, 1.0 mmol, 5 equiv), TBADT (33.5 mg, 0.02 mmol, 5 mol%), K<sub>3</sub>PO<sub>4</sub> (51.2 mg, 0.24 mmol, 1.2 equiv) and anhydrous acetone/PhCF<sub>3</sub> (0.5 mL/0.5 mL) and was purified by silica gel column chromatography (PE/EA = 10/1) to obtain **3cm** as colorless oil (24.5 mg, 52% yield, 85% ee). R<sub>f</sub> = 0.5 (PE/EA = 10/1).

<sup>1</sup>H NMR (600 MHz, CDCl<sub>3</sub>) δ 7.36 (t, *J* = 7.9 Hz, 1H), 7.22 (ddt, *J* = 7.7, 1.6, 0.8 Hz, 1H), 7.11 (t, *J* = 2.0 Hz, 1H), 7.03 (ddd, *J* = 8.1, 2.4, 1.0 Hz, 1H), 5.07 (dd, *J* = 7.9, 6.2 Hz, 1H), 4.31 (dd, *J* = 8.2, 6.2 Hz, 1H), 3.71 (t, *J* = 8.1 Hz, 1H), 2.30 (s, 3H), 1.54 (s, 3H), 1.48 (s, 3H);

<sup>13</sup>C NMR (151 MHz, CDCl<sub>3</sub>) δ 169.4, 150.9, 141.1, 129.6, 123.5, 121.2, 119.3, 109.9, 77.3, 71.5, 26.5, 25.9, 21.1;

HRMS: (ESI) calcd for C<sub>13</sub>H<sub>17</sub>O<sub>4</sub><sup>+</sup>[M+H]<sup>+</sup> 237.1121; found 237.1126.

The enantiomeric purity was established by HPLC analysis using a chiral column: OJ-H column, 30 °C, <sup>n</sup>Hexane/<sup>i</sup>Propanol = 90/10 as eluent, 204 nm, 1 mL/min. t<sub>R</sub> = 22.9 min (major), 13.8 min (minor).

Optical Rotation: [α]<sub>D</sub><sup>21</sup> -39.1 (c 0.1, <sup>i</sup>PrOH) for 85% ee.

Absolute stereochemistry was determined through analogy with **3cg**.

<Chromatogram>

mAU

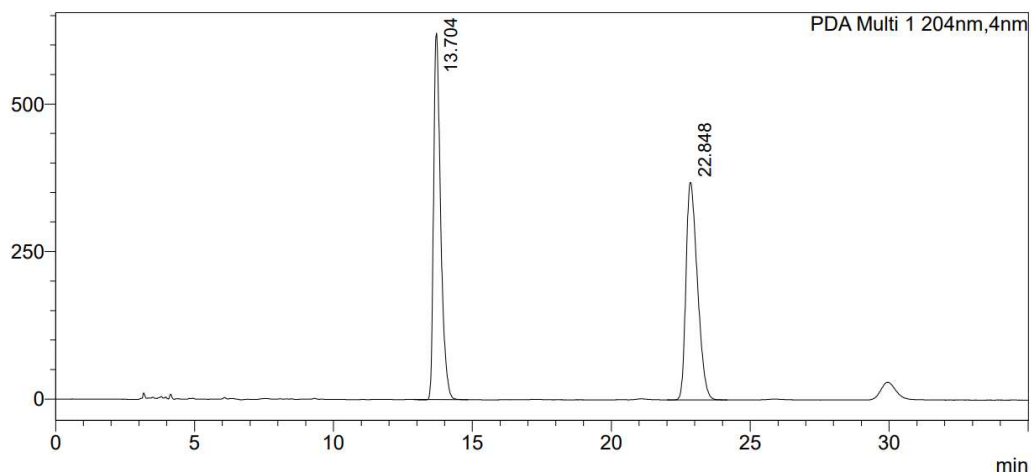

<Peak Table>

PDA Ch1 204nm

| Peak# | Ret. Time | Area     | Height | Conc. | Unit | Mark | Name |
|-------|-----------|----------|--------|-------|------|------|------|
| 1     | 13.704    | 10944673 | 620832 | 0.000 |      | M    |      |
| 2     | 22.848    | 10555364 | 368577 | 0.000 |      | M    |      |
| Total |           | 21500037 | 989409 |       |      |      |      |

Supplementary Figure 27. HPLC spectrum of racemic-3cm

<Chromatogram>

mAU

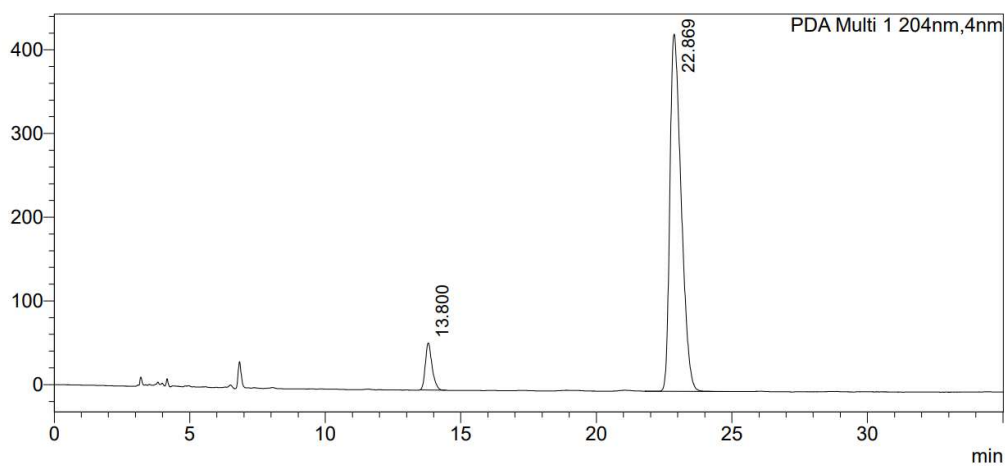

<Peak Table>

PDA Ch1 204nm

| Peak# | Ret. Time | Area     | Height | Conc. | Unit | Mark | Name |
|-------|-----------|----------|--------|-------|------|------|------|
| 1     | 13.800    | 973178   | 56228  | 0.000 |      | M    |      |
| 2     | 22.869    | 12332642 | 426823 | 0.000 |      | M    |      |
| Total |           | 13305819 | 483051 |       |      |      |      |

Supplementary Figure 28. HPLC spectrum of (R)-3cm

**(R)-4-(2-chlorophenyl)-2,2-dimethyl-1,3-dioxolane (3cn)**

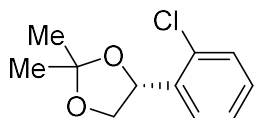

Chemical Formula: C<sub>11</sub>H<sub>13</sub>ClO<sub>2</sub>

Exact Mass: 212.0604

**3cn** was prepared according to general procedure **2.1** using NiBr<sub>2</sub>•dme (6.6 mg, 0.02 mmol, 10 mol%), **L6** (11.7 mg, 0.03 mmol, 15 mol%), 1-bromo-2-chlorobenzene (38.2 mg, 0.20 mmol, 1 equiv), 2,2-dimethyl-1,3-dioxolane (102.1 mg, 1.0 mmol, 5 equiv), TBADT (33.5 mg, 0.02 mmol, 5 mol%), K<sub>3</sub>PO<sub>4</sub> (51.2 mg, 0.24 mmol, 1.2 equiv) and anhydrous acetone/PhCF<sub>3</sub> (0.5 mL/0.5 mL) and was purified by silica gel column chromatography (PE/EA = 50/1) to obtain **3cn** as colorless oil (25.9 mg, 61% yield, 85% ee). R<sub>f</sub> = 0.6 (PE/EA = 50/1).

The NMR data matched those reported in the patent.<sup>6</sup>

<sup>1</sup>H NMR (600 MHz, CDCl<sub>3</sub>) δ 7.63 (dd, *J* = 7.9, 1.7 Hz, 1H), 7.33 (dd, *J* = 7.9, 1.3 Hz, 1H), 7.29 (td, *J* = 7.5, 1.3 Hz, 1H), 7.22 (td, *J* = 7.6, 1.8 Hz, 1H), 5.42 (t, *J* = 6.9 Hz, 1H), 4.54 (dd, *J* = 8.3, 6.6 Hz, 1H), 3.64 (dd, *J* = 8.3, 7.3 Hz, 1H), 1.57 (s, 3H), 1.51 (s, 3H);

<sup>13</sup>C NMR (151 MHz, CDCl<sub>3</sub>) δ 138.0, 131.7, 129.2, 128.7, 127.0, 126.7, 109.7, 74.9, 70.4, 26.4, 25.7;

The enantiomeric purity was established by HPLC analysis using a chiral column: OJ-H column, 30 °C, <sup>n</sup>Hexane/<sup>n</sup>Propanol = 97/3 as eluent, 254 nm, 1 mL/min. t<sub>R</sub> = 4.4 min (major), 5.0 min (minor).

Absolute stereochemistry was determined through analogy with **3cg**.

### <Chromatogram>

mAU

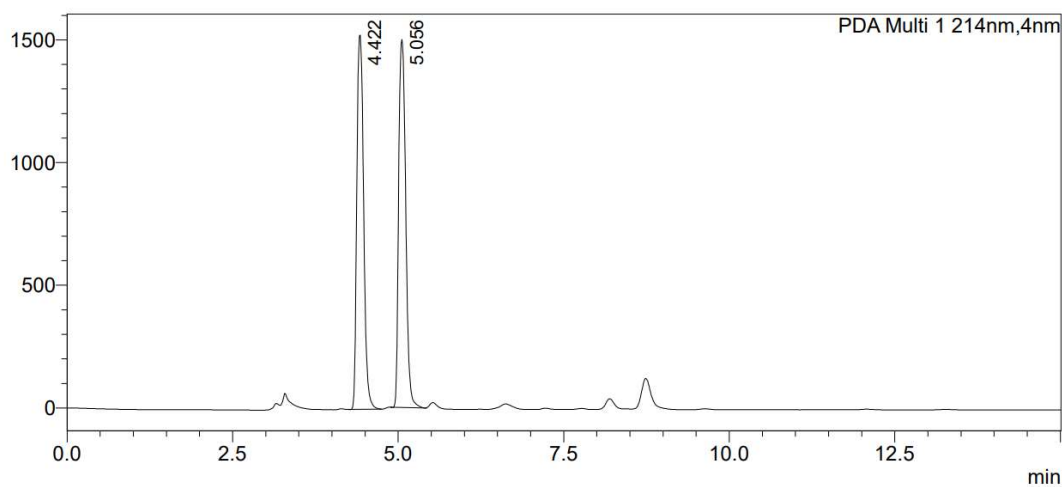

### <Peak Table>

PDA Ch1 214nm

| Peak# | Ret. Time | Area     | Height  | Conc.  | Unit | Mark | Name |
|-------|-----------|----------|---------|--------|------|------|------|
| 1     | 4.422     | 10913055 | 1525021 | 49.639 |      | M    |      |
| 2     | 5.056     | 11071977 | 1500461 | 50.361 |      | M    |      |
| Total |           | 21985033 | 3025483 |        |      |      |      |

Supplementary Figure 29. HPLC spectrum of racemic-3cn

### <Chromatogram>

mAU

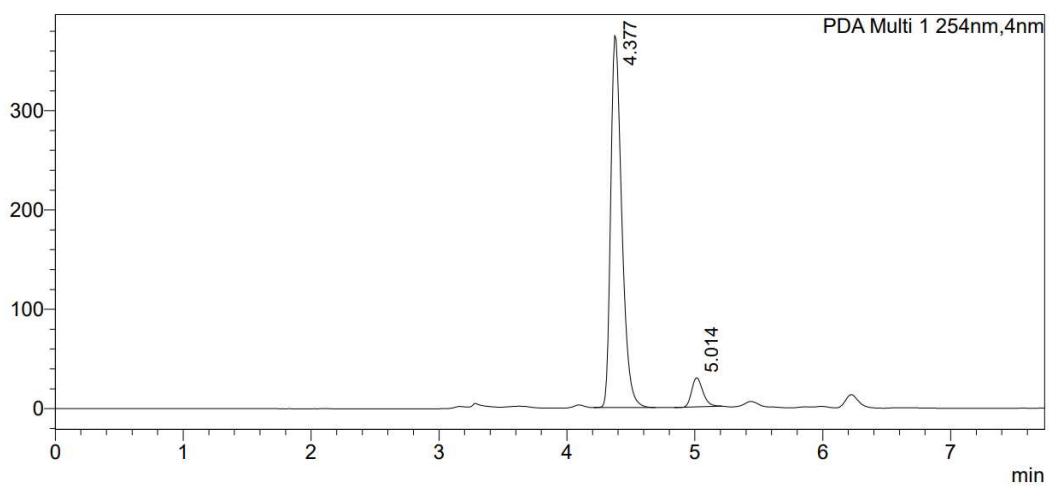

### <Peak Table>

PDA Ch1 254nm

| Peak# | Ret. Time | Area    | Height | Conc.  | Unit | Mark | Name |
|-------|-----------|---------|--------|--------|------|------|------|
| 1     | 4.377     | 2252584 | 374552 | 92.747 |      | M    |      |
| 2     | 5.014     | 176152  | 29223  | 7.253  |      | M    |      |
| Total |           | 2428736 | 403775 |        |      |      |      |

Supplementary Figure 30. HPLC spectrum of (R)-3cn

**(R)-4-(3,5-bis(trifluoromethyl)phenyl)-2,2-dimethyl-1,3-dioxolane (3co)**

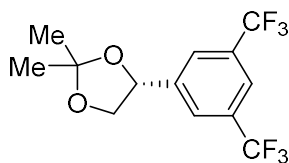

Chemical Formula: C<sub>13</sub>H<sub>12</sub>F<sub>6</sub>O<sub>2</sub>

Exact Mass: 314.0741

**3co** was prepared according to general procedure **2.1** using NiBr<sub>2</sub>•dme (6.6 mg, 0.02 mmol, 10 mol%), **L6** (11.7 mg, 0.03 mmol, 15 mol%), 1-bromo-3,5-bis(trifluoromethyl)benzene (58.6 mg, 0.20 mmol, 1 equiv), 2,2-dimethyl-1,3-dioxolane (102.1 mg, 1.0 mmol, 5 equiv), TBADT (33.5 mg, 0.02 mmol, 5 mol%), K<sub>3</sub>PO<sub>4</sub> (51.2 mg, 0.24 mmol, 1.2 equiv) and anhydrous acetone/PhCF<sub>3</sub> (0.5 mL/0.5 mL) and was purified by silica gel column chromatography (PE/EA = 50/1) to obtain **3co** as colorless oil (41.4 mg, 66% yield, 91% ee). R<sub>f</sub> = 0.6 (PE/EA = 50/1).

<sup>1</sup>H NMR (600 MHz, CDCl<sub>3</sub>) δ 7.86 – 7.76 (m, 3H), 5.18 (t, *J* = 6.9 Hz, 1H), 4.41 (dd, *J* = 8.4, 6.4 Hz, 1H), 3.72 (dd, *J* = 8.3, 7.4 Hz, 1H), 1.57 (s, 3H), 1.50 (s, 3H);

<sup>13</sup>C NMR (151 MHz, CDCl<sub>3</sub>) δ 142.5, 131.9 (q, *J* = 33.3 Hz), 126.2 (q, *J* = 3.9 Hz), 123.2 (q, *J* = 272.7 Hz), 121.9 (p, *J* = 3.9 Hz), 110.7, 76.5, 71.3, 26.4, 25.7;

<sup>19</sup>F NMR (565 MHz, CDCl<sub>3</sub>) δ -62.93.

HRMS: (APCI) calcd for C<sub>13</sub>H<sub>13</sub>F<sub>6</sub>O<sub>2</sub><sup>+</sup>[M+H]<sup>+</sup> 315.0814; found 315.0811.

The enantiomeric purity was established by HPLC analysis using a chiral column: OJ-H column, 30 °C, <sup>n</sup>Hexane/<sup>i</sup>Propanol = 97/3 as eluent, 196 nm, 1 mL/min. t<sub>R</sub> = 4.4 min (major), 3.9 min (minor).

Optical Rotation: [α]<sub>D</sub><sup>21</sup> -12.0 (c 0.4, <sup>i</sup>PrOH) for 91% ee.

Absolute stereochemistry was determined through analogy with **3cg**.



<Chromatogram>

mAU

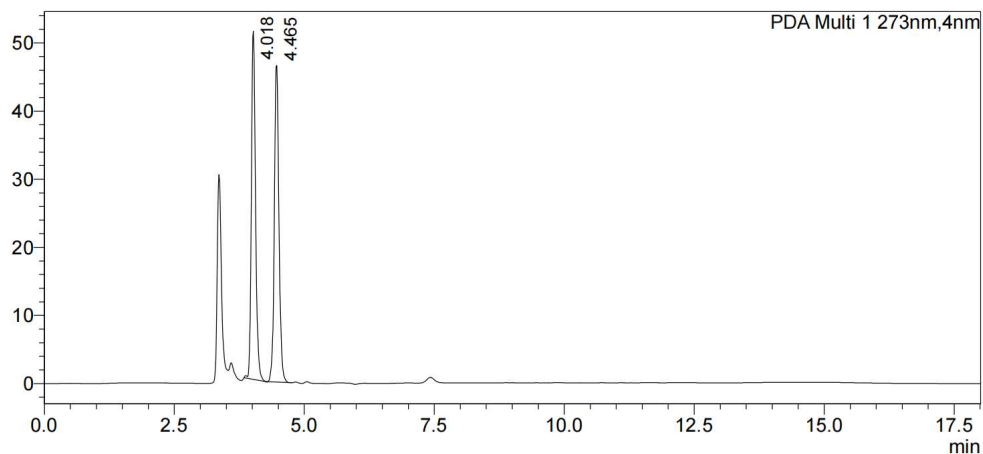

<Peak Table>

PDA Ch1 273nm

| Peak# | Ret. Time | Area   | Height | Conc. | Unit | Mark | Name |
|-------|-----------|--------|--------|-------|------|------|------|
| 1     | 4.018     | 285000 | 51093  | 0.000 |      | M    |      |
| 2     | 4.465     | 287260 | 46499  | 0.000 |      | M    |      |
| Total |           | 572260 | 97592  |       |      |      |      |

Supplementary Figure 31. HPLC spectrum of racemic-3co

<Chromatogram>

mAU

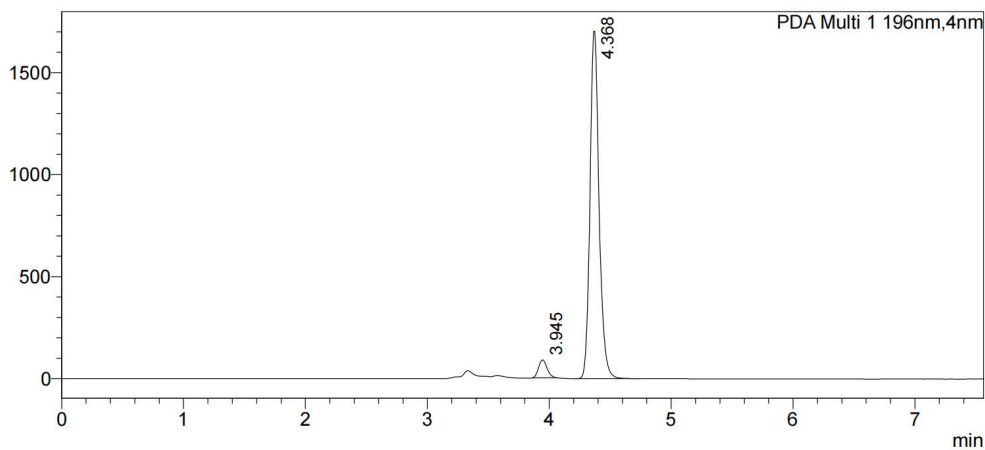

<Peak Table>

PDA Ch1 196nm

| Peak# | Ret. Time | Area    | Height  | Conc.  | Unit | Mark | Name |
|-------|-----------|---------|---------|--------|------|------|------|
| 1     | 3.945     | 419784  | 88289   | 4.528  |      | M    |      |
| 2     | 4.368     | 8850321 | 1701576 | 95.472 |      | M    |      |
| Total |           | 9270105 | 1789866 |        |      |      |      |

Supplementary Figure 32. HPLC spectrum of (R)-3co

**(R)-4-(2,2-dimethyl-1,3-dioxolan-4-yl)-1,2-phenylene diacetate (3cp)**

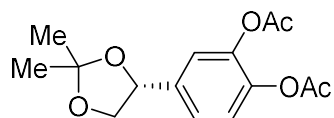

Chemical Formula: C<sub>15</sub>H<sub>18</sub>O<sub>6</sub>

Exact Mass: 294.1103

**3cp** was prepared according to general procedure **2.1** using NiBr<sub>2</sub>•dme (6.6 mg, 0.02 mmol, 10 mol%), **L6** (11.7 mg, 0.03 mmol, 15 mol%), 4-bromo-1,2-phenylene diacetate (54.6 mg, 0.20 mmol, 1 equiv), 2,2-dimethyl-1,3-dioxolane (102.1 mg, 1.0 mmol, 5 equiv), TBADT (33.5 mg, 0.02 mmol, 5 mol%), K<sub>3</sub>PO<sub>4</sub> (51.2 mg, 0.24 mmol, 1.2 equiv) and anhydrous acetone/PhCF<sub>3</sub> (0.5 mL/0.5 mL) and was purified by silica gel column chromatography (PE/EA = 5/1) to obtain **3cp** as colorless oil (28.2 mg, 48% yield, 88% ee). R<sub>f</sub> = 0.4 (PE/EA = 5/1).

<sup>1</sup>H NMR (600 MHz, CDCl<sub>3</sub>) δ 7.23 (ddd, *J* = 8.3, 2.1, 0.6 Hz, 1H), 7.21 (d, *J* = 2.0 Hz, 1H), 7.17 (d, *J* = 8.3 Hz, 1H), 5.05 (dd, *J* = 7.8, 6.2 Hz, 1H), 4.30 (dd, *J* = 8.3, 6.2 Hz, 1H), 3.71 (t, *J* = 8.0 Hz, 1H), 2.29 (s, 3H), 2.28 (s, 3H), 1.53 (s, 3H), 1.47 (s, 3H);

<sup>13</sup>C NMR (151 MHz, CDCl<sub>3</sub>) δ 168.3, 168.2, 142.1, 141.6, 138.3, 124.2, 123.5, 121.2, 110.0, 77.0, 71.4, 26.6, 25.9, 20.67, 20.66;

HRMS: (ESI) calcd for C<sub>15</sub>H<sub>18</sub>O<sub>6</sub>Na<sup>+</sup>[M+Na]<sup>+</sup> 317.0996; found 317.0988.

The enantiomeric purity was established by HPLC analysis using a chiral column: AD-H column, 30 °C, <sup>n</sup>Hexane/<sup>i</sup>Propanol = 90/10 as eluent, 194 nm, 1 mL/min. t<sub>R</sub> = 9.5 min (major), 8.4 min (minor).

Optical Rotation: [α]<sub>D</sub><sup>21</sup> -18.3 (c 0.1, <sup>i</sup>PrOH) for 88% ee.

Absolute stereochemistry was determined through analogy with **3cg**.

<Chromatogram>

mAU

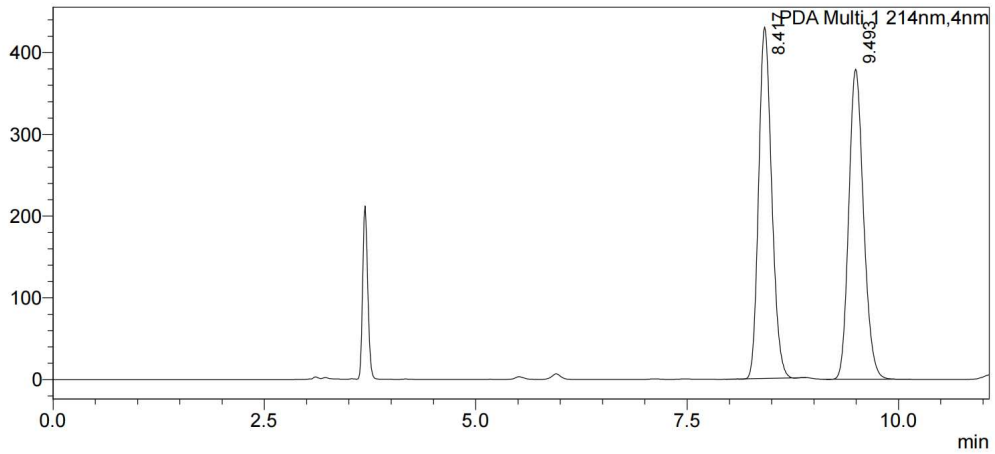

<Peak Table>

PDA Ch1 214nm

| Peak# | Ret. Time | Area    | Height | Conc. | Unit | Mark | Name |
|-------|-----------|---------|--------|-------|------|------|------|
| 1     | 8.417     | 4604975 | 430001 | 0.000 |      | M    |      |
| 2     | 9.493     | 4629495 | 379569 | 0.000 |      | M    |      |
| Total |           | 9234470 | 809571 |       |      |      |      |

Supplementary Figure 33. HPLC spectrum of racemic-3cp

<Chromatogram>

mAU

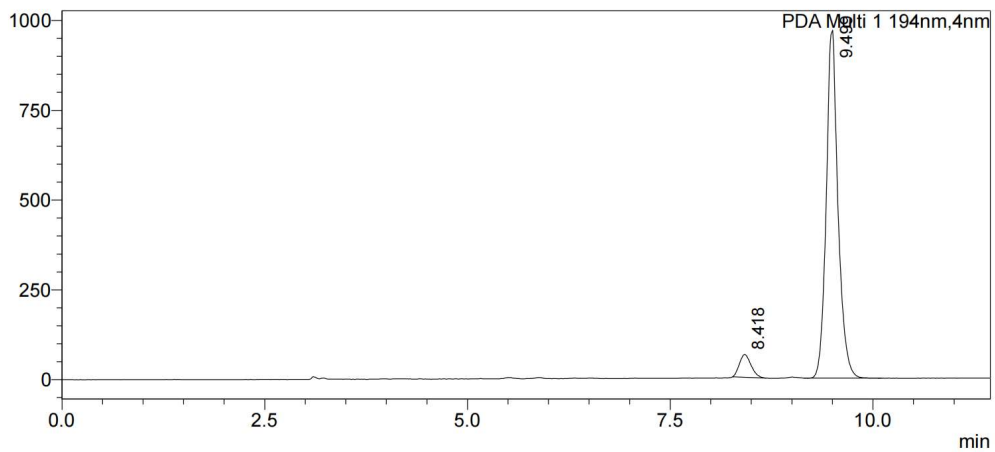

<Peak Table>

PDA Ch1 194nm

| Peak# | Ret. Time | Area     | Height  | Conc. | Unit | Mark | Name |
|-------|-----------|----------|---------|-------|------|------|------|
| 1     | 8.418     | 632316   | 63073   | 0.000 |      | M    |      |
| 2     | 9.499     | 9779679  | 968122  | 0.000 |      | M    |      |
| Total |           | 10411994 | 1031196 |       |      |      |      |

Supplementary Figure 34. HPLC spectrum of (R)-3cp

**(R)-5-(2,2-dimethyl-1,3-dioxolan-4-yl)isobenzofuran-1(3H)-one (3cq)**

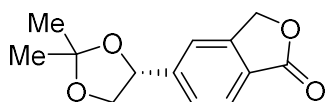

Chemical Formula: C<sub>13</sub>H<sub>14</sub>O<sub>4</sub>

Exact Mass: 234.0892

**3cq** was prepared according to general procedure **2.1** using NiBr<sub>2</sub>•dme (6.6 mg, 0.02 mmol, 10 mol%), **L6** (11.7 mg, 0.03 mmol, 15 mol%), 5-bromoisobenzofuran-1(3H)-one (42.6 mg, 0.20 mmol, 1 equiv), 2,2-dimethyl-1,3-dioxolane (102.1 mg, 1.0 mmol, 5 equiv), TBADT (33.5 mg, 0.02 mmol, 5 mol%), K<sub>3</sub>PO<sub>4</sub> (51.2 mg, 0.24 mmol, 1.2 equiv) and anhydrous acetone/PhCF<sub>3</sub> (0.5 mL/0.5 mL) and was purified by silica gel column chromatography (PE/EA = 3/1) to obtain **3cq** as colorless oil (25.3 mg, 54% yield, 93% ee). R<sub>f</sub> = 0.4 (PE/EA = 3/1).

<sup>1</sup>H NMR (600 MHz, CDCl<sub>3</sub>) δ 7.91 (d, *J* = 7.9 Hz, 1H), 7.56 – 7.53 (m, 1H), 7.50 (dd, *J* = 7.8, 1.3 Hz, 1H), 5.33 (d, *J* = 2.0 Hz, 2H), 5.23 – 5.18 (m, 1H), 4.40 (dd, *J* = 8.3, 6.4 Hz, 1H), 3.70 (dd, *J* = 8.3, 7.6 Hz, 1H), 1.58 (s, 3H), 1.51 (s, 3H);

<sup>13</sup>C NMR (151 MHz, CDCl<sub>3</sub>) δ 170.8, 147.2, 146.6, 127.0, 126.0, 125.5, 119.4, 110.4, 77.3, 71.5, 69.6, 26.5, 25.8;

HRMS: (ESI) calcd for C<sub>13</sub>H<sub>15</sub>O<sub>4</sub><sup>+</sup>[M+H]<sup>+</sup> 235.0965; found 235.0966.

The enantiomeric purity was established by HPLC analysis using a chiral column: AD-H column, 30 °C, <sup>n</sup>Hexane/<sup>i</sup>Propanol = 85/15 as eluent, 234 nm, 1 mL/min. t<sub>R</sub> = 9.2 min (major), 8.4 min (minor).

Optical Rotation: [α]<sub>D</sub><sup>21</sup> -22.8 (c 0.1, <sup>i</sup>PrOH) for 93% ee.

Absolute stereochemistry was determined through analogy with **3cg**.

<Chromatogram>

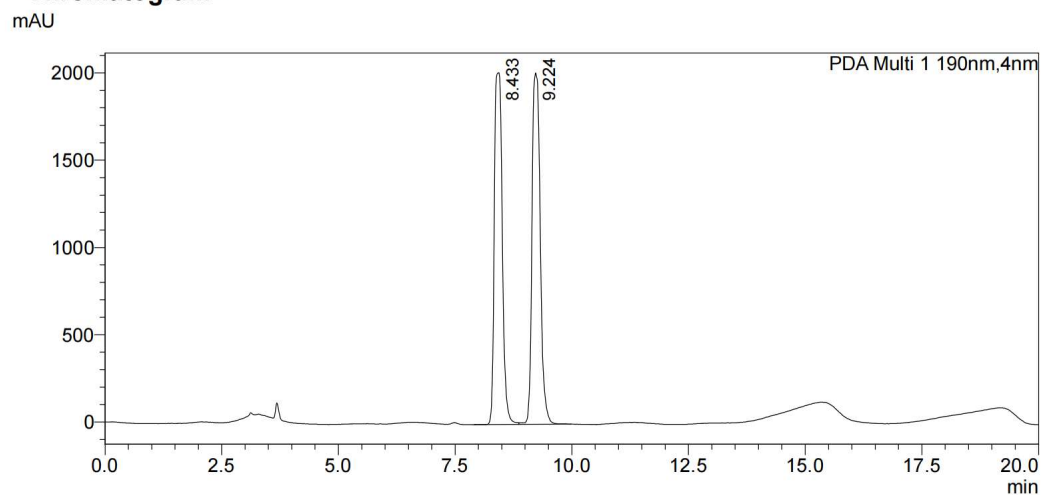

<Peak Table>

PDA Ch1 190nm

| Peak# | Ret. Time | Area     | Height  | Conc. | Unit | Mark | Name |
|-------|-----------|----------|---------|-------|------|------|------|
| 1     | 8.433     | 23803164 | 2015849 | 0.000 |      | M    |      |
| 2     | 9.224     | 24654673 | 2012991 | 0.000 |      | V M  |      |
| Total |           | 48457838 | 4028840 |       |      |      |      |

Supplementary Figure 35. HPLC spectrum of racemic-3cq

<Chromatogram>

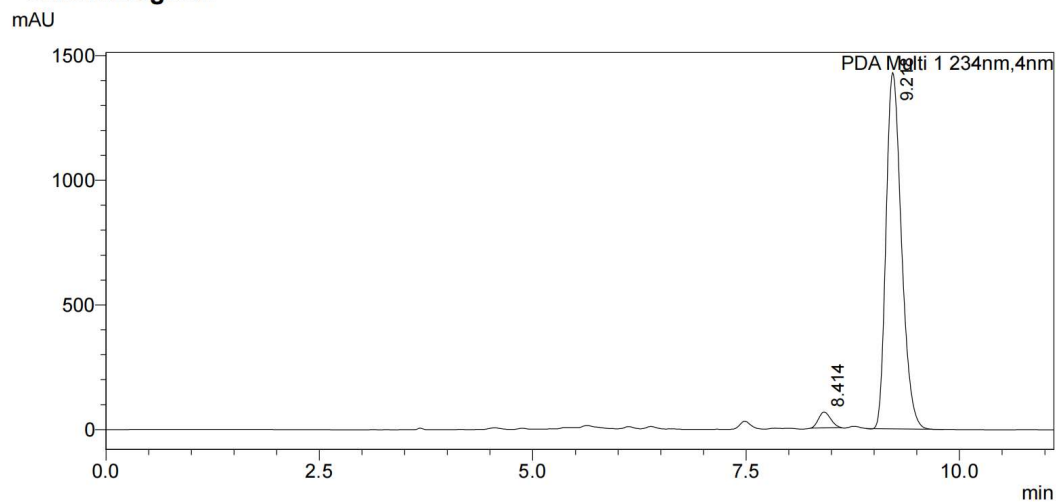

<Peak Table>

PDA Ch1 234nm

| Peak# | Ret. Time | Area     | Height  | Conc. | Unit | Mark | Name |
|-------|-----------|----------|---------|-------|------|------|------|
| 1     | 8.414     | 621650   | 63559   | 0.000 |      | M    |      |
| 2     | 9.218     | 17921306 | 1429602 | 0.000 |      | M    |      |
| Total |           | 18542956 | 1493161 |       |      |      |      |

Supplementary Figure 36. HPLC spectrum of (R)-3cq

**(R)-2,2-dimethyl-4-(naphthalen-2-yl)-1,3-dioxolane (3cr)**

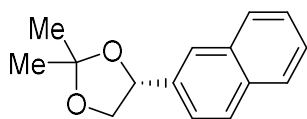

Chemical Formula: C<sub>15</sub>H<sub>16</sub>O<sub>2</sub>

Exact Mass: 228.1150

**3cr** was prepared according to general procedure **2.1** using NiBr<sub>2</sub>•dme (6.6 mg, 0.02 mmol, 10 mol%), **L6** (11.7 mg, 0.03 mmol, 15 mol%), 2-bromonaphthalene (41.4 mg, 0.20 mmol, 1 equiv), 2,2-dimethyl-1,3-dioxolane (102.1 mg, 1.0 mmol, 5 equiv), TBADT (33.5 mg, 0.02 mmol, 5 mol%), K<sub>3</sub>PO<sub>4</sub> (51.2 mg, 0.24 mmol, 1.2 equiv) and anhydrous acetone/PhCF<sub>3</sub> (0.5 mL/0.5 mL) and was purified by silica gel column chromatography (PE/EA = 50/1) to obtain **3cr** as colorless oil (20.5 mg, 45% yield, 86% ee). R<sub>f</sub> = 0.5 (PE/EA = 50/1).

The NMR data matched those reported in the literature.<sup>7</sup>

<sup>1</sup>H NMR (600 MHz, CDCl<sub>3</sub>) δ 7.88 – 7.82 (m, 4H), 7.52 – 7.46 (m, 3H), 5.26 (dd, *J* = 8.0, 6.3 Hz, 1H), 4.39 (dd, *J* = 8.2, 6.3 Hz, 1H), 3.81 (t, *J* = 8.1 Hz, 1H), 1.63 (s, 3H), 1.55 (s, 3H);

<sup>13</sup>C NMR (151 MHz, CDCl<sub>3</sub>) δ 136.5, 133.24, 133.23, 128.5, 128.0, 127.8, 126.3, 126.1, 125.3, 123.9, 109.9, 78.1, 71.6, 26.7, 26.0;

The enantiomeric purity was established by HPLC analysis using a chiral column: OJ-H column, 30 °C, <sup>n</sup>Hexane/<sup>i</sup>Propanol = 99/1 as eluent, 254 nm, 0.5 mL/min. t<sub>R</sub> = 18.9 min (major), 21.4 min (minor).

Optical Rotation: [α]<sub>D</sub><sup>21</sup> -45.1 (c 0.1, <sup>i</sup>PrOH) for 86% ee.

Absolute stereochemistry was determined through analogy with **3cg**.

### <Chromatogram>

mAU

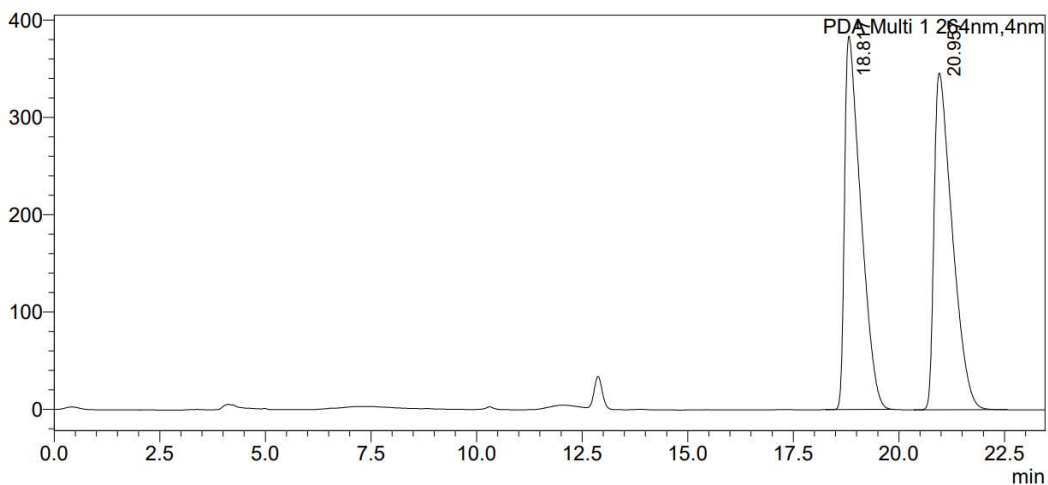

### <Peak Table>

PDA Ch1 264nm

| Peak# | Ret. Time | Area     | Height | Conc. | Unit | Mark | Name |
|-------|-----------|----------|--------|-------|------|------|------|
| 1     | 18.817    | 10289767 | 383793 | 0.000 |      | M    |      |
| 2     | 20.957    | 10393042 | 346126 | 0.000 |      | M    |      |
| Total |           | 20682809 | 729919 |       |      |      |      |

Supplementary Figure 37. HPLC spectrum of racemic-3cr

### <Chromatogram>

mAU

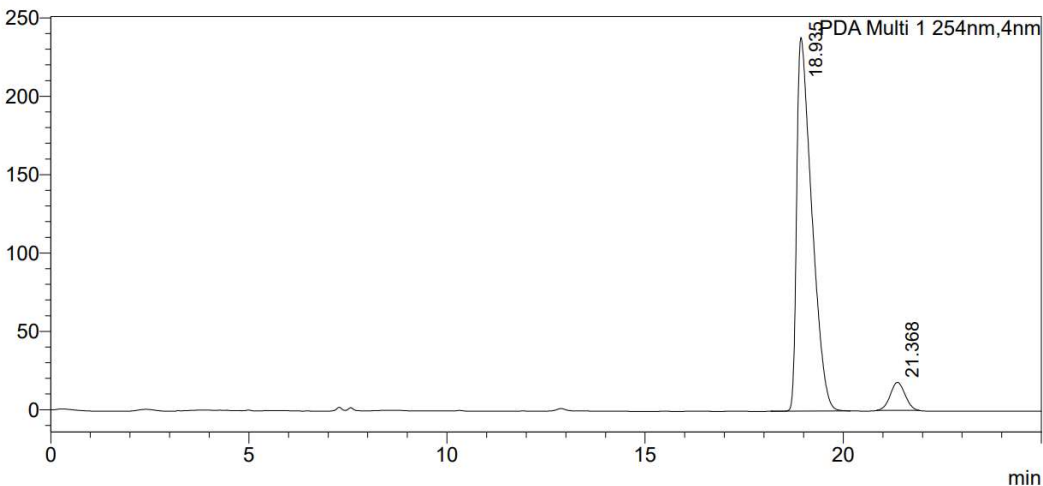

### <Peak Table>

PDA Ch1 254nm

| Peak# | Ret. Time | Area    | Height | Conc. | Unit | Mark | Name |
|-------|-----------|---------|--------|-------|------|------|------|
| 1     | 18.935    | 6317375 | 238377 | 0.000 |      | M    |      |
| 2     | 21.368    | 465876  | 17904  | 0.000 |      | M    |      |
| Total |           | 6783251 | 256281 |       |      |      |      |

Supplementary Figure 38. HPLC spectrum of (R)-3cr

**(R)-2-(2,2-dimethyl-1,3-dioxolan-4-yl)dibenzo[*b,d*]furan (3cs)**

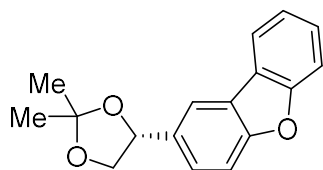

Chemical Formula: C<sub>17</sub>H<sub>16</sub>O<sub>3</sub>

Exact Mass: 268.1099

**3cs** was prepared according to general procedure **2.1** using NiBr<sub>2</sub>•dme (6.6 mg, 0.02 mmol, 10 mol%), **L6** (11.7 mg, 0.03 mmol, 15 mol%), 2-bromodibenzo[*b,d*]furan (49.4 mg, 0.20 mmol, 1 equiv), 2,2-dimethyl-1,3-dioxolane (102.1 mg, 1.0 mmol, 5 equiv), TBADT (33.5 mg, 0.02 mmol, 5 mol%), K<sub>3</sub>PO<sub>4</sub> (51.2 mg, 0.24 mmol, 1.2 equiv) and anhydrous acetone/PhCF<sub>3</sub> (0.5 mL/0.5 mL) and was purified by silica gel column chromatography (PE/EA = 50/1) to obtain **3cs** as colorless oil (27.3 mg, 51% yield, 88% ee). R<sub>f</sub> = 0.5 (PE/EA = 50/1).

<sup>1</sup>H NMR (600 MHz, CDCl<sub>3</sub>) δ 8.00 – 7.93 (m, 2H), 7.60 – 7.53 (m, 2H), 7.48 – 7.44 (m, 2H), 7.37 – 7.33 (m, 1H), 5.25 (dd, *J* = 8.1, 6.2 Hz, 1H), 4.38 (dd, *J* = 8.3, 6.2 Hz, 1H), 3.80 (t, *J* = 8.2 Hz, 1H), 1.63 (s, 3H), 1.54 (s, 3H);

<sup>13</sup>C NMR (151 MHz, CDCl<sub>3</sub>) δ 156.6, 156.0, 133.6, 127.3, 125.5, 124.5, 124.0, 122.8, 120.7, 118.5, 111.8, 111.7, 109.8, 78.1, 72.0, 26.8, 26.0;

HRMS: (ESI) calcd for C<sub>17</sub>H<sub>16</sub>O<sub>3</sub>Na<sup>+</sup>[M+Na]<sup>+</sup> 291.0992; found 291.0988.

The enantiomeric purity was established by HPLC analysis using a chiral column: AD-H column, 30 °C, <sup>n</sup>Hexane/<sup>i</sup>Propanol = 95/5 as eluent, 240 nm, 1 mL/min. t<sub>R</sub> = 5.9 min (major), 5.4 min (minor).

Optical Rotation: [α]<sub>D</sub><sup>21</sup> -44.1 (c 0.1, <sup>i</sup>PrOH) for 88% ee.

Absolute stereochemistry was determined through analogy with **3cg**.



<Chromatogram>

mAU

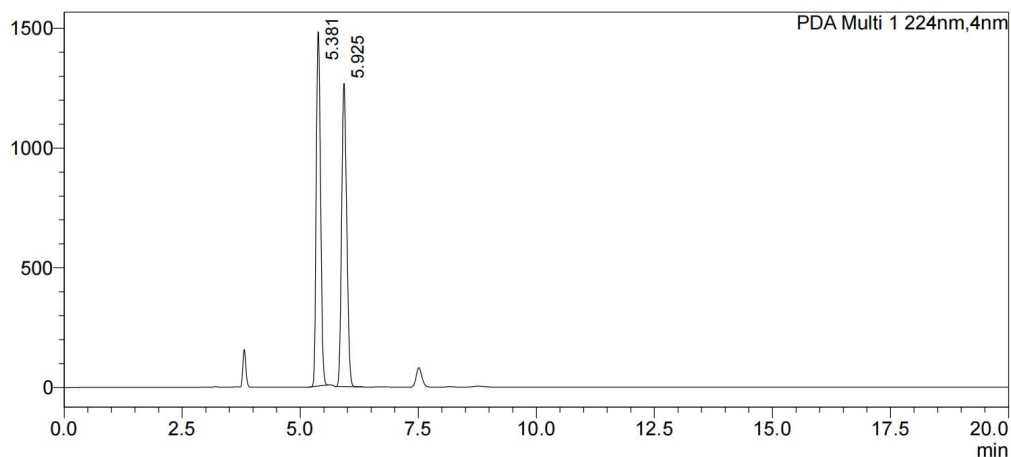

<Peak Table>

PDA Ch1 224nm

| Peak# | Ret. Time | Area     | Height  | Conc. | Unit | Mark | Name |
|-------|-----------|----------|---------|-------|------|------|------|
| 1     | 5.381     | 9342078  | 1478076 | 0.000 |      | M    |      |
| 2     | 5.925     | 9537838  | 1264020 | 0.000 |      | M    |      |
| Total |           | 18879916 | 2742096 |       |      |      |      |

Supplementary Figure 39. HPLC spectrum of racemic-3cs

<Chromatogram>

mAU

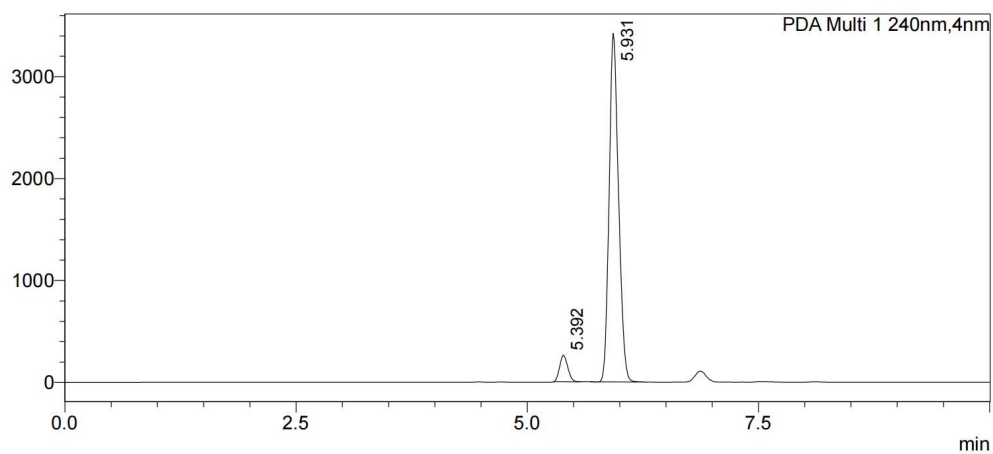

<Peak Table>

PDA Ch1 240nm

| Peak# | Ret. Time | Area     | Height  | Conc. | Unit | Mark | Name |
|-------|-----------|----------|---------|-------|------|------|------|
| 1     | 5.392     | 1561546  | 258463  | 0.000 |      | M    |      |
| 2     | 5.931     | 24222893 | 3417066 | 0.000 |      | M    |      |
| Total |           | 25784439 | 3675529 |       |      |      |      |

Supplementary Figure 40. HPLC spectrum of (R)-3cs

**(R)-4-(dibenzo[b,d]thiophen-2-yl)-2,2-dimethyl-1,3-dioxolane (3ct)**

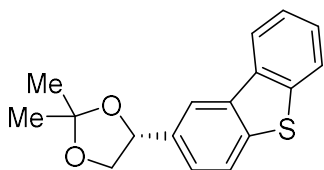

Chemical Formula: C<sub>17</sub>H<sub>16</sub>O<sub>2</sub>S

Exact Mass: 284.0871

**3ct** was prepared according to general procedure **2.1** using NiBr<sub>2</sub>•dme (6.6 mg, 0.02 mmol, 10 mol%), **L6** (11.7 mg, 0.03 mmol, 15 mol%), 2-bromodibenzo[*b,d*]thiophene (52.6 mg, 0.20 mmol, 1 equiv), 2,2-dimethyl-1,3-dioxolane (102.1 mg, 1.0 mmol, 5 equiv), TBADT (33.5 mg, 0.02 mmol, 5 mol%), K<sub>3</sub>PO<sub>4</sub> (51.2 mg, 0.24 mmol, 1.2 equiv) and anhydrous acetone/PhCF<sub>3</sub> (0.5 mL/0.5 mL) and was purified by silica gel column chromatography (PE/EA = 50/1) to obtain **3ct** as colorless oil (31.8 mg, 56% yield, 90% ee). R<sub>f</sub> = 0.5 (PE/EA = 50/1).

<sup>1</sup>H NMR (600 MHz, CDCl<sub>3</sub>) δ 8.21 – 8.15 (m, 2H), 7.89 – 7.82 (m, 2H), 7.49 – 7.44 (m, 3H), 5.27 (dd, *J* = 8.0, 6.2 Hz, 1H), 4.40 (dd, *J* = 8.3, 6.3 Hz, 1H), 3.81 (t, *J* = 8.2 Hz, 1H), 1.64 (s, 3H), 1.56 (s, 3H);

<sup>13</sup>C NMR (151 MHz, CDCl<sub>3</sub>) δ 139.9, 139.2, 135.7, 135.6, 135.3, 126.9, 124.9, 124.4, 123.0, 122.9, 121.7, 119.3, 109.9, 78.1, 71.9, 26.7, 26.0;

HRMS: (ESI) calcd for C<sub>17</sub>H<sub>16</sub>O<sub>2</sub>SNa<sup>+</sup>[M+Na]<sup>+</sup> 307.0763; found 307.0763.

The enantiomeric purity was established by HPLC analysis using a chiral column: AD-H column, 30 °C, <sup>n</sup>Hexane/<sup>i</sup>Propanol = 95/5 as eluent, 264 nm, 1 mL/min. t<sub>R</sub> = 7.3 min (major), 6.7 min (minor).

Optical Rotation: [α]<sub>D</sub><sup>21</sup> -90.4 (c 0.1, <sup>i</sup>PrOH) for 90% ee.

Absolute stereochemistry was determined through analogy with **3cg**.

<Chromatogram>

mAU

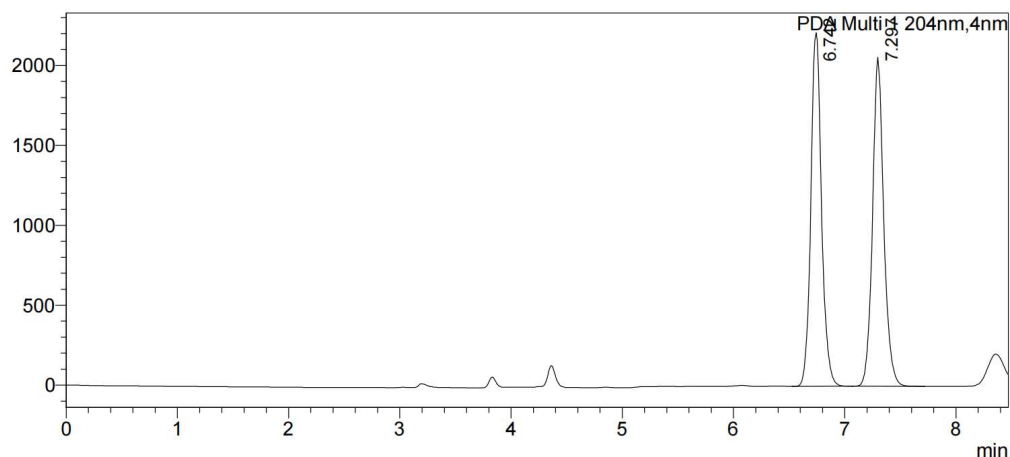

<Peak Table>

PDA Ch1 204nm

| Peak# | Ret. Time | Area     | Height  | Conc. | Unit | Mark | Name |
|-------|-----------|----------|---------|-------|------|------|------|
| 1     | 6.742     | 14770591 | 2211955 | 0.000 |      | M    |      |
| 2     | 7.297     | 14425664 | 2058569 | 0.000 |      | M    |      |
| Total |           | 29196255 | 4270524 |       |      |      |      |

Supplementary Figure 41. HPLC spectrum of racemic-3ct

<Chromatogram>

mAU

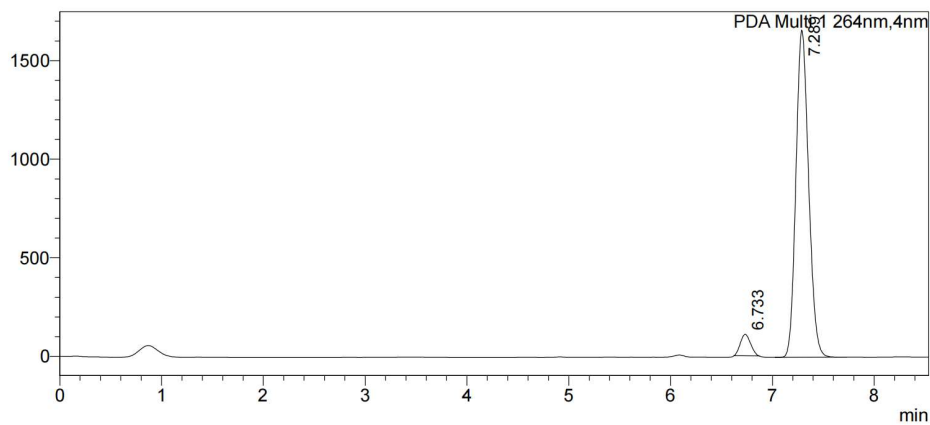

<Peak Table>

PDA Ch1 264nm

| Peak# | Ret. Time | Area     | Height  | Conc. | Unit | Mark | Name |
|-------|-----------|----------|---------|-------|------|------|------|
| 1     | 6.733     | 766878   | 109228  | 0.000 |      | M    |      |
| 2     | 7.289     | 14404275 | 1659312 | 0.000 |      | M    |      |
| Total |           | 15171153 | 1768540 |       |      |      |      |

Supplementary Figure 42. HPLC spectrum of (R)-3ct

**(R)-4-(benzo[*b*]thiophen-5-yl)-2,2-dimethyl-1,3-dioxolane (3cu)**

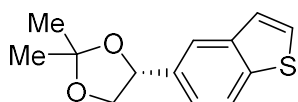

Chemical Formula: C<sub>13</sub>H<sub>14</sub>O<sub>2</sub>S

Exact Mass: 234.0715

**3cu** was prepared according to general procedure **2.1** using NiBr<sub>2</sub>•dme (6.6 mg, 0.02 mmol, 10 mol%), **L6** (11.7 mg, 0.03 mmol, 15 mol%), 5-bromobenzo[*b*]thiophene (42.6 mg, 0.20 mmol, 1 equiv), 2,2-dimethyl-1,3-dioxolane (102.1 mg, 1.0 mmol, 5 equiv), TBADT (33.5 mg, 0.02 mmol, 5 mol%), K<sub>3</sub>PO<sub>4</sub> (51.2 mg, 0.24 mmol, 1.2 equiv) and anhydrous acetone/PhCF<sub>3</sub> (0.5 mL/0.5 mL) and was purified by silica gel column chromatography (PE/EA = 50/1) to obtain **3cu** as colorless oil (24.8 mg, 53% yield, 89% ee). R<sub>f</sub> = 0.5 (PE/EA = 50/1).

<sup>1</sup>H NMR (600 MHz, CDCl<sub>3</sub>) δ 7.87 (d, *J* = 8.3 Hz, 1H), 7.83 (d, *J* = 1.6 Hz, 1H), 7.46 (d, *J* = 5.4 Hz, 1H), 7.37 – 7.31 (m, 2H), 5.21 (dd, *J* = 8.0, 6.2 Hz, 1H), 4.35 (dd, *J* = 8.2, 6.2 Hz, 1H), 3.76 (t, *J* = 8.1 Hz, 1H), 1.59 (s, 3H), 1.57 (s, 3H);

<sup>13</sup>C NMR (151 MHz, CDCl<sub>3</sub>) δ 139.8, 139.4, 135.3, 127.1, 123.8, 122.7, 122.5, 121.3, 109.8, 78.1, 71.9, 26.7, 26.0;

HRMS: (ESI) calcd for C<sub>13</sub>H<sub>14</sub>O<sub>2</sub>SNa<sup>+</sup>[M+Na]<sup>+</sup> 257.0607; found 257.0609.

The enantiomeric purity was established by HPLC analysis using a chiral column: OD-H column, 30 °C, <sup>n</sup>Hexane/<sup>i</sup>Propanol = 95/5 as eluent, 210 nm, 1 mL/min. tR = 6.6 min (major), 5.8 min (minor).

Optical Rotation: [α]<sub>D</sub><sup>21</sup> -31.2 (c 0.1, <sup>i</sup>PrOH) for 89% ee.

Absolute stereochemistry was determined through analogy with **3cg**.

<Chromatogram>

mAU

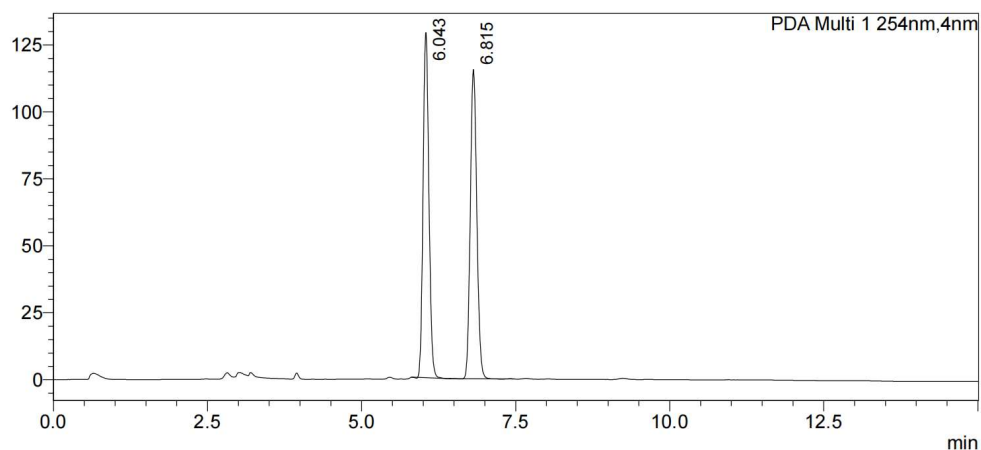

<Peak Table>

PDA Ch1 254nm

| Peak# | Ret. Time | Area    | Height | Conc. | Unit | Mark | Name |
|-------|-----------|---------|--------|-------|------|------|------|
| 1     | 6.043     | 846890  | 128798 | 0.000 |      | M    |      |
| 2     | 6.815     | 850219  | 115523 | 0.000 |      | M    |      |
| Total |           | 1697108 | 244320 |       |      |      |      |

Supplementary Figure 43. HPLC spectrum of racemic-3cu

<Chromatogram>

mAU

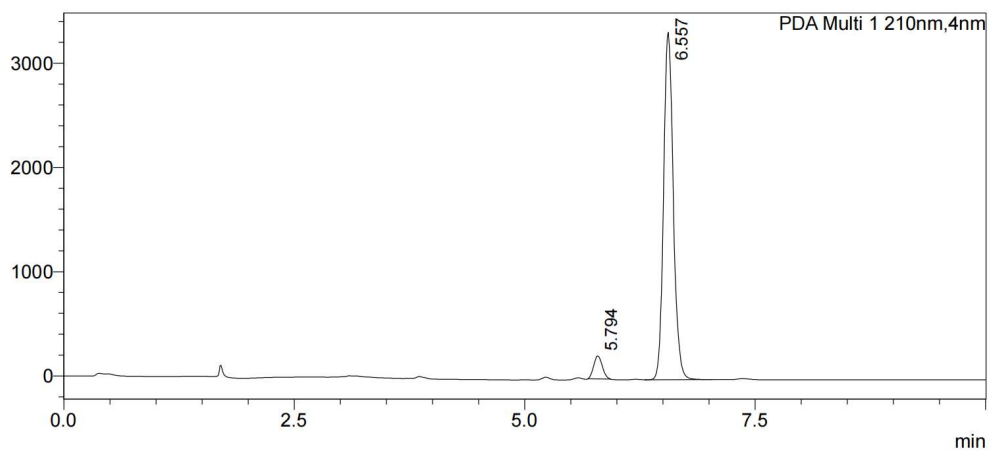

<Peak Table>

PDA Ch1 210nm

| Peak# | Ret. Time | Area     | Height  | Conc.  | Unit | Mark | Name |
|-------|-----------|----------|---------|--------|------|------|------|
| 1     | 5.794     | 1434693  | 221567  | 5.542  |      | M    |      |
| 2     | 6.557     | 24454942 | 3331979 | 94.458 |      | M    |      |
| Total |           | 25889635 | 3553546 |        |      |      |      |

Supplementary Figure 44. HPLC spectrum of (R)-3cu

**(R)-5-(2,2-dimethyl-1,3-dioxolan-4-yl)-2-(trifluoromethyl)pyridine (3cv)**

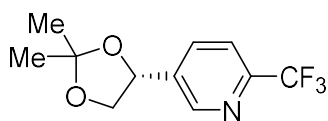

Chemical Formula: C<sub>11</sub>H<sub>12</sub>F<sub>3</sub>NO<sub>2</sub>

Exact Mass: 247.0820

**3cv** was prepared according to general procedure **2.1** using NiBr<sub>2</sub>•dme (6.6 mg, 0.02 mmol, 10 mol%), **L6** (11.7 mg, 0.03 mmol, 15 mol%), 5-bromo-2-(trifluoromethyl)pyridine (45.2 mg, 0.20 mmol, 1 equiv), 2,2-dimethyl-1,3-dioxolane (102.1 mg, 1.0 mmol, 5 equiv), TBADT (33.5 mg, 0.02 mmol, 5 mol%), K<sub>3</sub>PO<sub>4</sub> (51.2 mg, 0.24 mmol, 1.2 equiv) and anhydrous acetone/PhCF<sub>3</sub> (0.5 mL/0.5 mL) and was purified by silica gel column chromatography (PE/EA = 5/1) to obtain **3cv** as colorless oil (30.1 mg, 61% yield, 91% ee). R<sub>f</sub> = 0.6 (PE/EA = 5/1).

<sup>1</sup>H NMR (600 MHz, CDCl<sub>3</sub>) δ 8.71 (d, *J* = 2.1 Hz, 1H), 7.90 (dd, *J* = 8.2, 2.1 Hz, 1H), 7.69 (d, *J* = 8.1 Hz, 1H), 5.19 (t, *J* = 6.8 Hz, 1H), 4.42 (dd, *J* = 8.4, 6.5 Hz, 1H), 3.77 – 3.71 (m, 1H), 1.56 (s, 3H), 1.50 (s, 3H);

<sup>13</sup>C NMR (151 MHz, CDCl<sub>3</sub>) δ 148.1, 147.9 (q, *J* = 34.7 Hz), 138.7, 135.0, 121.5 (q, *J* = 274.8 Hz), 120.4 (q, *J* = 3.0 Hz), 110.7, 75.0, 71.2, 26.4, 25.6;

<sup>19</sup>F NMR (565 MHz, CDCl<sub>3</sub>) δ -67.88.

HRMS: (APCI) calcd for C<sub>11</sub>H<sub>13</sub>F<sub>3</sub>NO<sub>2</sub><sup>+</sup>[M+H]<sup>+</sup> 248.0893; found 248.0887.

The enantiomeric purity was established by HPLC analysis using a chiral column: OJ-H column, 30 °C, <sup>n</sup>Hexane/<sup>i</sup>Propanol = 85/15 as eluent, 244 nm, 1 mL/min. t<sub>R</sub> = 5.6 min (major), 6.0 min (minor).

Optical Rotation: [α]<sub>D</sub><sup>22</sup> -46.0 (c 0.1, <sup>i</sup>PrOH) for 91% ee.

Absolute stereochemistry was determined through analogy with **3cg**.

<Chromatogram>

mAU

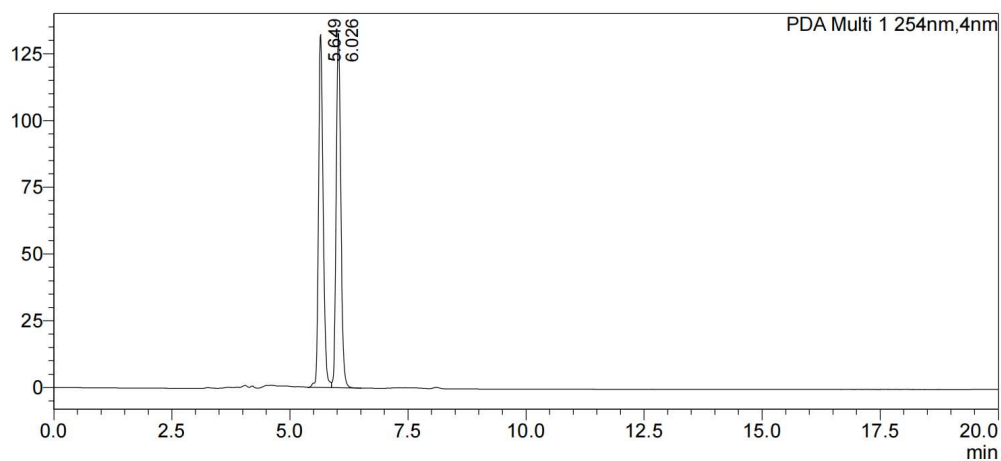

<Peak Table>

PDA Ch1 254nm

| Peak# | Ret. Time | Area    | Height | Conc. | Unit | Mark | Name |
|-------|-----------|---------|--------|-------|------|------|------|
| 1     | 5.649     | 908522  | 132154 | 0.000 |      | M    |      |
| 2     | 6.026     | 902400  | 132669 | 0.000 |      | V M  |      |
| Total |           | 1810922 | 264823 |       |      |      |      |

Supplementary Figure 45. HPLC spectrum of racemic-3cv

<Chromatogram>

mAU

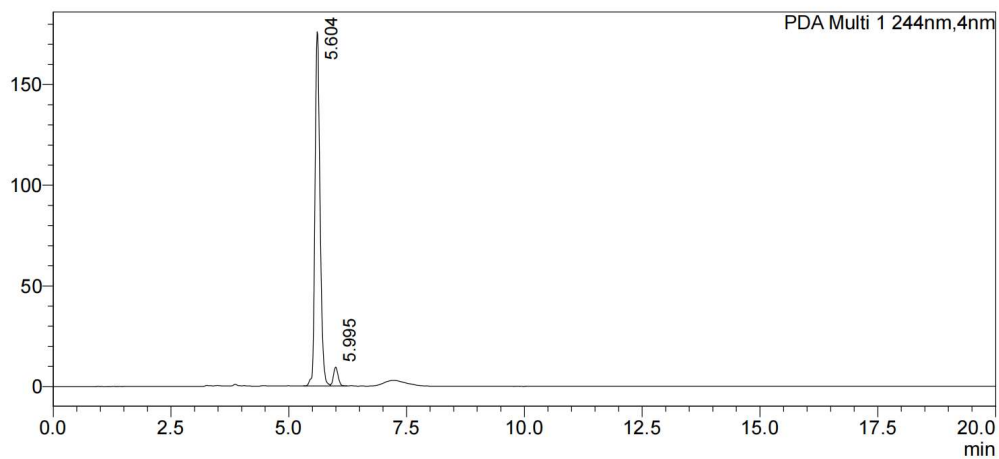

<Peak Table>

PDA Ch1 244nm

| Peak# | Ret. Time | Area    | Height | Conc. | Unit | Mark | Name |
|-------|-----------|---------|--------|-------|------|------|------|
| 1     | 5.604     | 1315765 | 175897 | 0.000 |      | M    |      |
| 2     | 5.995     | 63849   | 9384   | 0.000 |      | V M  |      |
| Total |           | 1379614 | 185281 |       |      |      |      |

Supplementary Figure 46. HPLC spectrum of (R)-3cv

(R)-5-(2,2-dimethyl-1,3-dioxolan-4-yl)picolinonitrile (3cw)

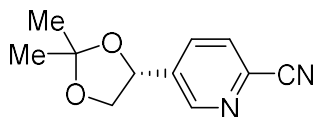

Chemical Formula:  $C_{11}H_{12}N_2O_2$   
Exact Mass: 204.0899

**3cw** was prepared according to general procedure **2.1** using  $NiBr_2 \cdot dme$  (6.6 mg, 0.02 mmol, 10 mol%), **L6** (11.7 mg, 0.03 mmol, 15 mol%), 5-bromopicolinonitrile (36.6 mg, 0.20 mmol, 1 equiv), 2,2-dimethyl-1,3-dioxolane (102.1 mg, 1.0 mmol, 5 equiv), TBADT (33.5 mg, 0.02 mmol, 5 mol%),  $K_3PO_4$  (51.2 mg, 0.24 mmol, 1.2 equiv) and anhydrous acetone/ $PhCF_3$  (0.5 mL/0.5 mL) and was purified by silica gel column chromatography (PE/EA = 3/1) to obtain **3cw** as colorless oil (30.6 mg, 75% yield, 90% ee).  $R_f = 0.6$  (PE/EA = 3/1).

$^1H$  NMR (600 MHz,  $CDCl_3$ )  $\delta$  8.68 (d,  $J = 2.2$  Hz, 1H), 7.85 (dd,  $J = 8.0, 2.2$  Hz, 1H), 7.70 (d,  $J = 7.9$  Hz, 1H), 5.16 (t,  $J = 6.8$  Hz, 1H), 4.40 (dd,  $J = 8.4, 6.5$  Hz, 1H), 3.71 (dd,  $J = 8.5, 7.1$  Hz, 1H), 1.54 (s, 3H), 1.48 (s, 3H);

$^{13}C$  NMR (151 MHz,  $CDCl_3$ )  $\delta$  149.2, 139.5, 134.6, 133.3, 128.3, 117.1, 110.8, 75.0, 71.0, 26.4, 25.6;

HRMS: (APCI) calcd for  $C_{11}H_{13}N_2O_2^+[M+H]^+$  205.0972; found 205.0967.

The enantiomeric purity was established by HPLC analysis using a chiral column: OJ-H column, 30 °C,  $^n$ Hexane/ $^i$ Propanol = 80/20 as eluent, 198 nm, 1 mL/min.  $t_R = 11.3$  min (major), 15.7 min (minor).

Optical Rotation:  $[\alpha]_D^{21} -71.7$  (c 0.2,  $^i$ PrOH) for 90% ee.

Absolute stereochemistry was determined through analogy with **3cg**.



<Chromatogram>

mAU

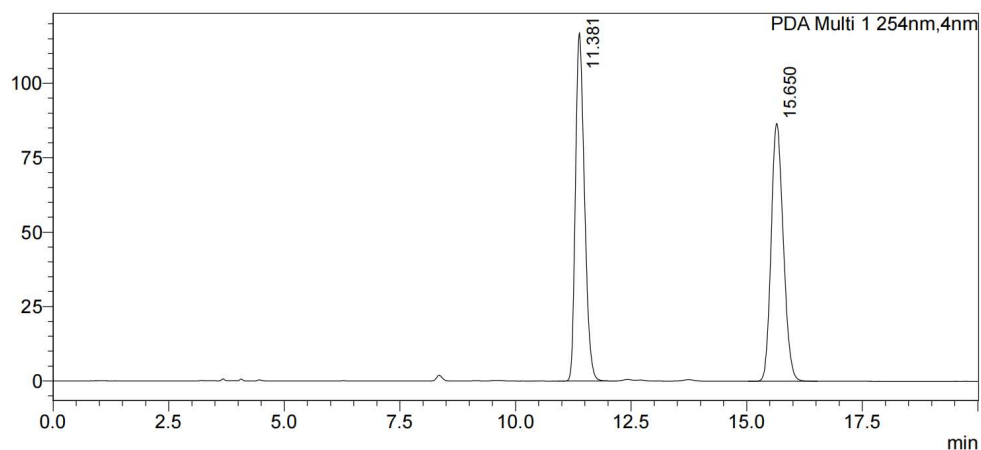

<Peak Table>

PDA Ch1 254nm

| Peak# | Ret. Time | Area    | Height | Conc. | Unit | Mark | Name |
|-------|-----------|---------|--------|-------|------|------|------|
| 1     | 11.381    | 1586685 | 117038 | 0.000 |      | M    |      |
| 2     | 15.650    | 1587833 | 86625  | 0.000 |      | M    |      |
| Total |           | 3174518 | 203662 |       |      |      |      |

Supplementary Figure 47. HPLC spectrum of racemic-3cw

<Chromatogram>

mAU

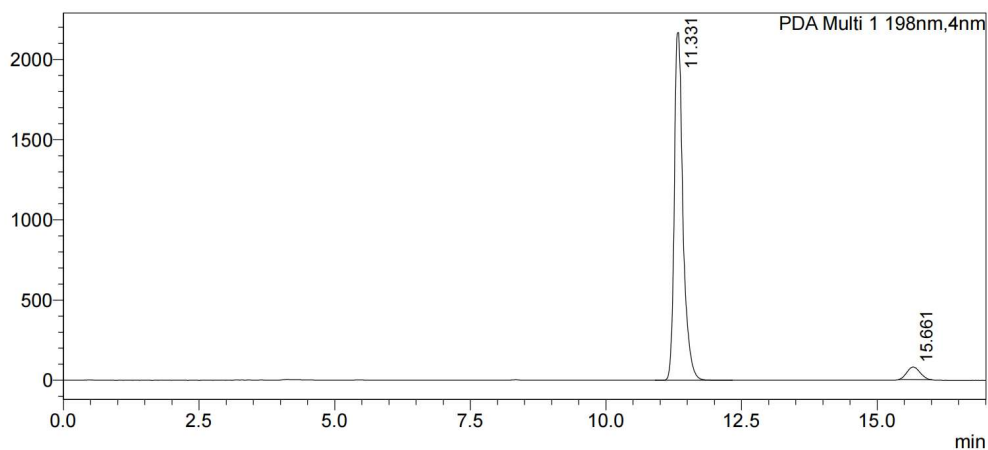

<Peak Table>

PDA Ch1 198nm

| Peak# | Ret. Time | Area     | Height  | Conc.  | Unit | Mark | Name |
|-------|-----------|----------|---------|--------|------|------|------|
| 1     | 11.331    | 24154819 | 2167966 | 94.848 |      | M    |      |
| 2     | 15.661    | 1312094  | 78503   | 5.152  |      | M    |      |
| Total |           | 25466913 | 2246469 |        |      |      |      |

Supplementary Figure 48. HPLC spectrum of (R)-3cw

**methyl (4-((*R*)-2,2-dimethyl-1,3-dioxolan-4-yl)benzoyl)-*D*-phenylalaninate (**3cx**)**

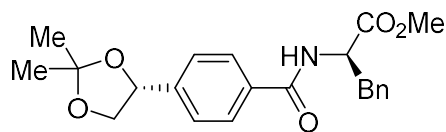

Chemical Formula: C<sub>22</sub>H<sub>25</sub>NO<sub>5</sub>

Exact Mass: 383.1733

**3cx** was prepared according to general procedure **2.1** using NiBr<sub>2</sub>•dme (6.6 mg, 0.02 mmol, 10 mol%), **L6** (11.7 mg, 0.03 mmol, 15 mol%), methyl (4-bromobenzoyl)-*D*-phenylalaninate (72.4 mg, 0.20 mmol, 1 equiv), 2,2-dimethyl-1,3-dioxolane (102.1 mg, 1.0 mmol, 5 equiv), TBADT (33.5 mg, 0.02 mmol, 5 mol%), K<sub>3</sub>PO<sub>4</sub> (51.2 mg, 0.24 mmol, 1.2 equiv) and anhydrous acetone/PhCF<sub>3</sub> (0.5 mL/0.5 mL) and was purified by silica gel column chromatography (PE/EA = 3/1) to obtain **3cx** as colorless oil (55.2 mg, 72% yield, d.r. > 19/1). R<sub>f</sub> = 0.4 (PE/EA = 3/1).

<sup>1</sup>H NMR (600 MHz, CDCl<sub>3</sub>) δ 7.74 – 7.68 (m, 2H), 7.42 – 7.38 (m, 2H), 7.30 – 7.26 (m, 2H), 7.26 – 7.22 (m, 1H), 7.14 – 7.10 (m, 2H), 6.62 (d, *J* = 7.5 Hz, 1H), 5.12 – 5.05 (m, 2H), 4.32 (dd, *J* = 8.2, 6.3 Hz, 1H), 3.76 (s, 3H), 3.67 (t, *J* = 8.0 Hz, 1H), 3.28 (dd, *J* = 13.9, 5.8 Hz, 1H), 3.21 (dd, *J* = 13.9, 5.5 Hz, 1H), 1.54 (s, 3H), 1.48 (s, 3H);

<sup>13</sup>C NMR (151 MHz, CDCl<sub>3</sub>) δ 172.1, 166.5, 143.4, 135.8, 133.5, 129.3, 128.7, 127.3, 127.2, 126.3, 110.1, 77.3, 71.5, 53.5, 52.5, 37.9, 26.5, 25.9;

HRMS: (APCI) calcd for C<sub>22</sub>H<sub>26</sub>NO<sub>5</sub><sup>+</sup>[M+H]<sup>+</sup> 384.1804; found 384.1800.

Optical Rotation: [α]<sub>D</sub><sup>21</sup> 50.1 (c 0.2, <sup>t</sup>PrOH).

Absolute stereochemistry was determined through analogy with **3cg**.

***N*-((1*S*,4*S*)-4-(3,4-dichlorophenyl)-1,2,3,4-tetrahydronaphthalen-1-yl)-4-((*R*)-2,2-dimethyl-1,3-dioxolan-4-yl)-*N*-methylbenzamide (**3cy**)**

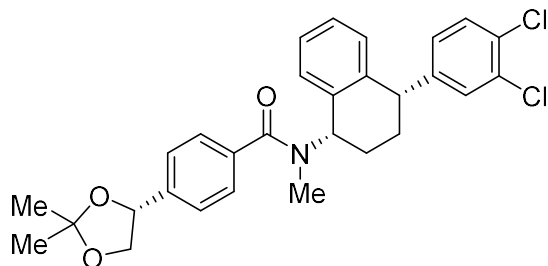

Chemical Formula: C<sub>29</sub>H<sub>29</sub>Cl<sub>2</sub>NO<sub>3</sub>

Exact Mass: 509.1524

**3cy** was prepared according to general procedure **2.1** using NiBr<sub>2</sub>•dme (6.6 mg, 0.02 mmol, 10 mol%), **L6** (11.7 mg, 0.03 mmol, 15 mol%), 4-bromo-*N*-((1*S*,4*S*)-4-(3,4-dichlorophenyl)-1,2,3,4-tetrahydronaphthalen-1-yl)-*N*-methylbenzamide (97.8 mg, 0.20 mmol, 1 equiv), 2,2-dimethyl-1,3-dioxolane (102.1 mg, 1.0 mmol, 5 equiv), TBADT (33.5 mg, 0.02 mmol, 5 mol%), K<sub>3</sub>PO<sub>4</sub> (51.2 mg, 0.24 mmol, 1.2 equiv) and anhydrous acetone/PhCF<sub>3</sub> (0.5 mL/0.5 mL) and was purified by silica gel column chromatography (PE/EA = 3/1) to obtain **3cy** as colorless oil (55.0 mg, 54% yield, d.r. > 19/1). R<sub>f</sub> = 0.5 (PE/EA = 3/1).

<sup>1</sup>H NMR (600 MHz, CDCl<sub>3</sub>) δ 7.54 – 7.46 (m, 2H), 7.47 – 7.39 (m, 2H), 7.36 – 7.27 (m, 3H), 7.25 – 7.05 (m, 2H), 7.01 – 6.94 (m, 1H), 6.89 – 6.74 (m, 1H), 6.08 – 5.10 (m, 1H), 5.09 – 4.91 (m, 1H), 4.37 – 4.28 (m, 1H), 4.26 – 4.09 (m, 1H), 3.73 – 3.64 (m, 1H), 2.92 – 2.64 (m, 3H), 2.41 – 1.77 (m, 4H), 1.58 – 1.45 (m, 6H);

<sup>13</sup>C NMR (151 MHz, CDCl<sub>3</sub>) δ 172.5, 172.2, 147.0, 146.7, 141.98, 140.8, 138.4, 137.9, 136.3, 135.7, 135.6, 132.5, 132.3, 131.1, 131.0, 130.7, 130.6, 130.3, 130.2, 130.1, 128.12, 128.07, 127.94, 127.93, 127.8, 127.6, 127.5, 127.3, 127.27, 127.25, 126.7, 126.51, 126.49, 126.3, 110.03, 110.00, 77.5, 71.61, 71.56, 58.6, 52.8, 43.1, 42.7, 33.1, 30.1, 20.0, 28.9, 26.6, 25.92, 25.86, 22.6, 21.2;

HRMS: (ESI) calcd for C<sub>29</sub>H<sub>30</sub>Cl<sub>2</sub>NO<sub>3</sub><sup>+</sup>[M+H]<sup>+</sup> 510.1597; found 510.1591.

Optical Rotation: [α]<sub>D</sub><sup>21</sup> -79.8 (c 0.1, <sup>i</sup>PrOH).

Absolute stereochemistry was determined through analogy with **3cg**.

**(3*S*,8*S*,9*S*,10*R*,13*R*,14*S*,17*R*)-10,13-dimethyl-17-((*R*)-6-methylheptan-2-yl)-2,3,4,7,8,9,10,11,12,13,14,15,16,17-tetradecahydro-1*H*-cyclopenta[*a*]phenanthren-3-yl 4-**

**((R)-2,2-dimethyl-1,3-dioxolan-4-yl)benzoate (3cz)**

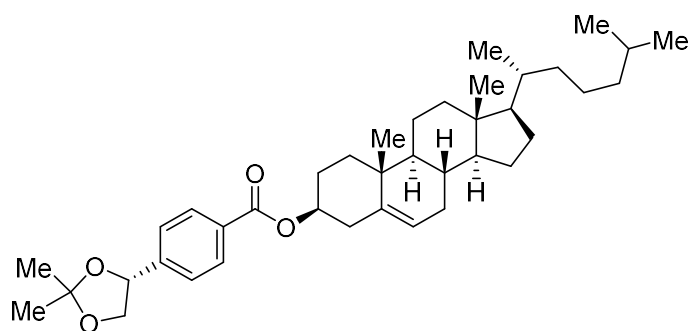

Chemical Formula: C<sub>39</sub>H<sub>58</sub>O<sub>4</sub>  
Exact Mass: 590.4335

**3cz** was prepared according to general procedure **2.1** using NiBr<sub>2</sub>•dme (6.6 mg, 0.02 mmol, 10 mol%), **L6** (11.7 mg, 0.03 mmol, 15 mol%), (3*S*,8*S*,9*S*,10*R*,13*R*,14*S*,17*R*)-10,13-dimethyl-17-((*R*)-6-methylheptan-2-yl)-2,3,4,7,8,9,10,11,12,13,14,15,16,17-tetradecahydro-1*H*-cyclopenta [*a*]phenanthren-3-yl 4-bromobenzoate (114.1 mg, 0.20 mmol, 1 equiv), 2,2-dimethyl-1,3-dioxolane (102.1 mg, 1.0 mmol, 5 equiv), TBADT (33.5 mg, 0.02 mmol, 5 mol%), K<sub>3</sub>PO<sub>4</sub> (51.2 mg, 0.24 mmol, 1.2 equiv) and anhydrous acetone/PhCF<sub>3</sub> (0.5 mL/0.5 mL) and was purified by silica gel column chromatography (PE/EA = 10/1) to obtain **3cz** as colorless oil (68.4 mg, 58% yield, d.r. > 19/1). R<sub>f</sub> = 0.6 (PE/EA = 10/1).

<sup>1</sup>H NMR (600 MHz, CDCl<sub>3</sub>) δ 8.06 – 7.99 (m, 2H), 7.45 – 7.38 (m, 2H), 5.43 – 5.39 (m, 1H), 5.12 (dd, *J* = 7.8, 6.3 Hz, 1H), 4.89 – 4.81 (m, 1H), 4.33 (dd, *J* = 8.2, 6.3 Hz, 1H), 3.67 (t, *J* = 8.1 Hz, 1H), 2.46 (d, *J* = 7.7 Hz, 2H), 2.05 – 1.96 (m, 3H), 1.94 – 1.89 (m, 1H), 1.87 – 1.80 (m, 1H), 1.77 – 1.70 (m, 1H), 1.61 – 1.43 (m, 12H), 1.41 – 1.30 (m, 3H), 1.29 – 1.08 (m, 8H), 1.06 (s, 3H), 1.04 – 0.95 (m, 3H), 0.92 (d, *J* = 6.5 Hz, 3H), 0.87 (d, *J* = 2.7 Hz, 3H), 0.86 (d, *J* = 2.7 Hz, 3H), 0.69 (s, 3H);

<sup>13</sup>C NMR (151 MHz, CDCl<sub>3</sub>) δ 165.7, 144.3, 139.6, 130.5, 129.8, 125.9, 122.8, 110.1, 77.5, 74.7, 71.5, 56.7, 56.2, 50.1, 42.3, 39.8, 39.5, 38.2, 37.0, 36.7, 36.2, 35.8, 32.0, 31.9, 28.3, 28.0, 27.9, 26.5, 25.9, 24.3, 23.9, 22.9, 22.6, 21.1, 19.4, 18.7, 11.9.

HRMS: (APCI) calcd for C<sub>39</sub>H<sub>59</sub>O<sub>4</sub><sup>+</sup>[M+H]<sup>+</sup> 591.4408; found 591.4390.

Optical Rotation: [α]<sub>D</sub><sup>21</sup> -93.0 (c 0.1, <sup>t</sup>PrOH).

Absolute stereochemistry was determined through analogy with **3cg**.

**(1*R*,2*S*,5*R*)-2-isopropyl-5-methylcyclohexyl  
benzoate (**3caa**)**

**4-((*R*)-2,2-dimethyl-1,3-dioxolan-4-yl)**

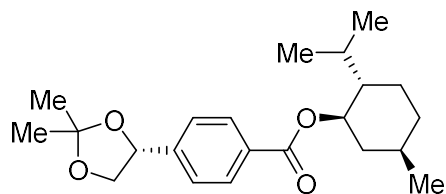

Chemical Formula: C<sub>22</sub>H<sub>32</sub>O<sub>4</sub>  
Exact Mass: 360.2301

**3caa** was prepared according to general procedure **2.1** using NiBr<sub>2</sub>•dme (6.6 mg, 0.02 mmol, 10 mol%), **L6** (11.7 mg, 0.03 mmol, 15 mol%), (1*R*,2*S*,5*R*)-2-isopropyl-5-methylcyclohexyl 4-bromobenzoate (67.8 mg, 0.20 mmol, 1 equiv), 2,2-dimethyl-1,3-dioxolane (102.1 mg, 1.0 mmol, 5 equiv), TBADT (33.5 mg, 0.02 mmol, 5 mol%), K<sub>3</sub>PO<sub>4</sub> (51.2 mg, 0.24 mmol, 1.2 equiv) and anhydrous acetone/PhCF<sub>3</sub> (0.5 mL/0.5 mL) and was purified by silica gel column chromatography (PE/EA = 10/1) to obtain **3caa** as colorless oil (48.2 mg, 67% yield, d.r. > 19/1). R<sub>f</sub> = 0.6 (PE/EA = 10/1).

<sup>1</sup>H NMR (600 MHz, CDCl<sub>3</sub>) δ 8.05 – 8.01 (m, 2H), 7.45 – 7.39 (m, 2H), 5.12 (dd, *J* = 7.8, 6.3 Hz, 1H), 4.95 – 4.89 (m, 1H), 4.33 (dd, *J* = 8.3, 6.3 Hz, 1H), 3.67 (t, *J* = 8.0 Hz, 1H), 2.14 – 2.09 (m, 1H), 1.98 – 1.90 (m, 1H), 1.75 – 1.68 (m, 2H), 1.54 (s, 5H), 1.49 (s, 3H), 1.17 – 1.06 (m, 2H), 0.91 (t, *J* = 7.3 Hz, 7H), 0.78 (d, *J* = 6.9 Hz, 3H);

<sup>13</sup>C NMR (151 MHz, CDCl<sub>3</sub>) δ 165.8, 144.4, 130.5, 129.9, 125.9, 110.1, 77.4, 74.9, 71.5, 47.3, 41.0, 34.3, 31.5, 26.53, 26.49, 25.9, 23.7, 22.1, 20.8, 16.5;

HRMS: (ESI) calcd for C<sub>22</sub>H<sub>33</sub>O<sub>4</sub><sup>+</sup>[M+H]<sup>+</sup> 361.2373; found 361.2365.

Optical Rotation: [α]<sub>D</sub><sup>21</sup> -218.2 (c 0.2, <sup>i</sup>PrOH).

Absolute stereochemistry was determined through analogy with **3cg**.

**(8*R*,9*S*,13*S*,14*S*)-13-methyl-17-oxo-7,8,9,11,12,13,14,15,16,17-decahydro-6*H*-  
cyclopenta[*a*]phenanthren-3-yl 4-((*R*)-2,2-dimethyl-1,3-dioxolan-4-yl)benzoate (**3cab**)**

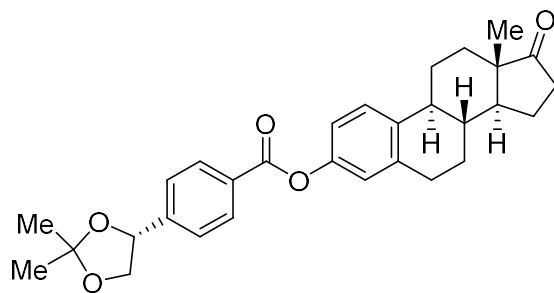

Chemical Formula:  $C_{30}H_{34}O_5$

Exact Mass: 474.2406

**3cab** was prepared according to general procedure **2.1** using  $NiBr_2 \cdot dme$  (6.6 mg, 0.02 mmol, 10 mol%), **L6** (11.7 mg, 0.03 mmol, 15 mol%), (8*R*,9*S*,13*S*,14*S*)-13-methyl-17-oxo-7,8,9,11,12,13,14,15,16,17-decahydro-6*H*-cyclopenta[*a*]phenanthren-3-yl 4-bromobenzoate (90.6 mg, 0.20 mmol, 1 equiv), 2,2-dimethyl-1,3-dioxolane (102.1 mg, 1.0 mmol, 5 equiv), TBADT (33.5 mg, 0.02 mmol, 5 mol%),  $K_3PO_4$  (51.2 mg, 0.24 mmol, 1.2 equiv) and anhydrous acetone/ $PhCF_3$  (0.5 mL/0.5 mL) and was purified by silica gel column chromatography (PE/EA = 3/1) to obtain **3cab** as colorless oil (61.6 mg, 65% yield, d.r. > 19/1).  $R_f$  = 0.4 (PE/EA = 4/1).  $^1H$  NMR (600 MHz,  $CDCl_3$ )  $\delta$  8.21 – 8.15 (m, 2H), 7.53 – 7.48 (m, 2H), 7.33 (dd,  $J$  = 8.6, 1.1 Hz, 1H), 6.98 (dd,  $J$  = 8.5, 2.6 Hz, 1H), 6.94 (d,  $J$  = 2.5 Hz, 1H), 5.17 (dd,  $J$  = 7.7, 6.4 Hz, 1H), 4.37 (dd,  $J$  = 8.2, 6.4 Hz, 1H), 3.71 (t,  $J$  = 8.0 Hz, 1H), 2.96 – 2.90 (m, 2H), 2.54 – 2.48 (m, 1H), 2.45 – 2.40 (m, 1H), 2.35 – 2.28 (m, 1H), 2.18 – 2.11 (m, 1H), 2.09 – 2.00 (m, 2H), 2.00 – 1.95 (m, 1H), 1.66 – 1.60 (m, 2H), 1.59 – 1.43 (m, 10H), 0.92 (s, 3H);  $^{13}C$  NMR (151 MHz,  $CDCl_3$ )  $\delta$  220.9, 165.2, 148.8, 145.3, 138.1, 137.5, 130.5, 129.3, 126.5, 126.1, 121.7, 118.9, 110.2, 77.4, 71.5, 50.5, 48.0, 44.2, 38.0, 35.9, 31.6, 29.5, 26.5, 26.4, 25.9, 25.8, 21.6, 13.9; HRMS: (ESI) calcd for  $C_{30}H_{35}O_5^+[M+H]^+$  475.2479; found 475.2473. Optical Rotation:  $[\alpha]_D^{21}$  103.8 (c 0.2,  $^iPrOH$ ). Absolute stereochemistry was determined through analogy with **3cg**.

**(R)-3-(2,2-dimethyl-1,3-dioxolan-4-yl)cyclohex-2-en-1-one (3cac)**

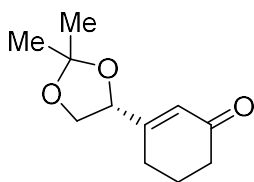

Chemical Formula: C<sub>11</sub>H<sub>16</sub>O<sub>3</sub>

Exact Mass: 196.1099

**3cac** was prepared according to general procedure **2.1** using NiBr<sub>2</sub>•dme (6.6 mg, 0.02 mmol, 10 mol%), **L6** (11.7 mg, 0.03 mmol, 15 mol%), 3-bromocyclohex-2-en-1-one (35.0 mg, 0.20 mmol, 1 equiv), 2,2-dimethyl-1,3-dioxolane (102.1 mg, 1.0 mmol, 5 equiv), TBADT (33.5 mg, 0.02 mmol, 5 mol%), K<sub>3</sub>PO<sub>4</sub> (51.2 mg, 0.24 mmol, 1.2 equiv) and anhydrous acetone/PhCF<sub>3</sub> (0.5 mL/0.5 mL) and was purified by silica gel column chromatography (PE/EA = 4/1) to obtain **3cac** as colorless oil (16.5 mg, 42% yield, 95% ee). R<sub>f</sub> = 0.5 (PE/EA = 4/1).

<sup>1</sup>H NMR (600 MHz, CDCl<sub>3</sub>) δ 6.13 (q, *J* = 1.5 Hz, 1H), 4.63 (t, *J* = 7.0 Hz, 1H), 4.23 (dd, *J* = 8.3, 6.9 Hz, 1H), 3.72 – 3.68 (m, 1H), 2.41 (td, *J* = 6.2, 1.1 Hz, 2H), 2.29 (qd, *J* = 6.1, 1.6 Hz, 2H), 2.06 – 2.00 (m, 2H), 1.46 (s, 3H), 1.42 (s, 3H);

<sup>13</sup>C NMR (151 MHz, CDCl<sub>3</sub>) δ 199.5, 161.7, 124.9, 110.4, 77.7, 68.5, 37.8, 26.1, 25.5, 25.4, 22.6;

HRMS: (APCI) calcd for C<sub>11</sub>H<sub>17</sub>O<sub>3</sub><sup>+</sup>[M+H]<sup>+</sup> 197.1172; found 197.1170.

The enantiomeric purity was established by HPLC analysis using a chiral column: AD-H column, 30 °C, <sup>n</sup>Hexane/<sup>i</sup>Propanol = 90/10 as eluent, 204 nm, 1 mL/min. t<sub>R</sub> = 6.7 min (major), 7.6 min (minor).

Optical Rotation: [α]<sub>D</sub><sup>21</sup> -14.5 (c 0.1, <sup>i</sup>PrOH) for 95% ee.

Absolute stereochemistry was determined through analogy with **3cg**.

<Chromatogram>

mAU

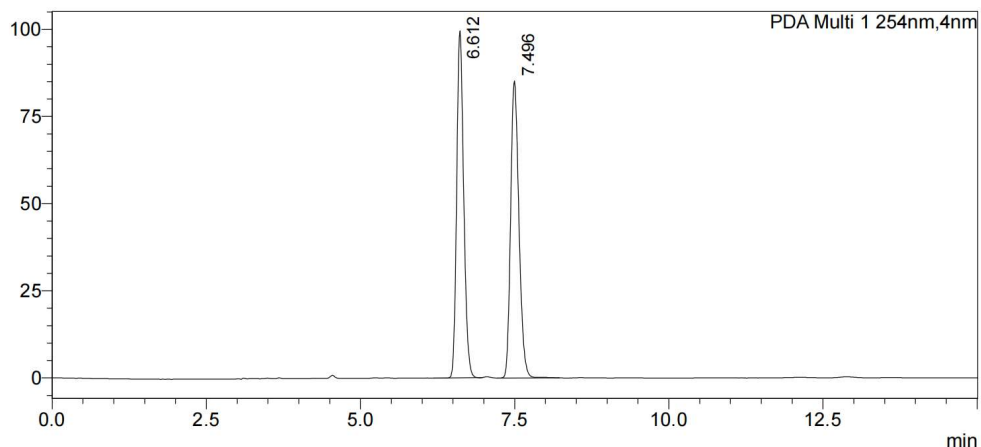

<Peak Table>

PDA Ch1 254nm

| Peak# | Ret. Time | Area    | Height | Conc. | Unit | Mark | Name |
|-------|-----------|---------|--------|-------|------|------|------|
| 1     | 6.612     | 785869  | 99509  | 0.000 |      | M    |      |
| 2     | 7.496     | 797401  | 85242  | 0.000 |      | M    |      |
| Total |           | 1583269 | 184750 |       |      |      |      |

Supplementary Figure 49. HPLC spectrum of racemic-3cac

<Chromatogram>

mAU

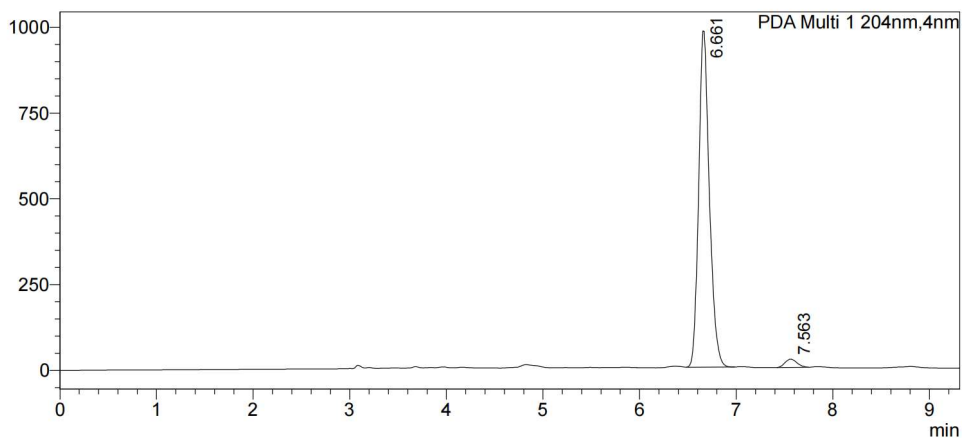

<Peak Table>

PDA Ch1 204nm

| Peak# | Ret. Time | Area    | Height  | Conc. | Unit | Mark | Name |
|-------|-----------|---------|---------|-------|------|------|------|
| 1     | 6.661     | 7538653 | 980038  | 0.000 |      | M    |      |
| 2     | 7.563     | 198822  | 23528   | 0.000 |      | M    |      |
| Total |           | 7737475 | 1003566 |       |      |      |      |

Supplementary Figure 50. HPLC spectrum of (R)-3cac



**(R)-3-((R)-2,2-dimethyl-1,3-dioxolan-4-yl)cyclohexan-1-one (3cad)**

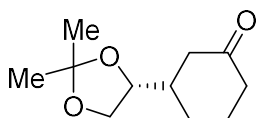

Chemical Formula: C<sub>11</sub>H<sub>18</sub>O<sub>3</sub>

Exact Mass: 198.1256

An oven-dried 10-mL Schlenk equipped with a PTFE-coated stir bar was charged with 5% Pd/C (36.6 mg, 0.018 mmol, 15 mol%) and **3cac** (19.6 mg, 0.10 mmol, 1 equiv) in toluene (1 mL) and CH<sub>2</sub>Cl<sub>2</sub> (1 mL). The reaction mixture was stirred under H<sub>2</sub> atmosphere (10 bar) at 25 °C for 24 hours. The mixture was filtered through Celite and the filtrate was condensed. The residue was purified by silica gel column chromatography (PE/EtOAc = 5/1) to obtain **3cad** as colorless oil (17.4 mg, 88%, d.r. > 20:1).

<sup>1</sup>H NMR (600 MHz, CDCl<sub>3</sub>) δ 4.05 – 3.98 (m, 1H), 3.92 (q, *J* = 6.8 Hz, 1H), 3.67 – 3.60 (m, 1H), 2.39 (ddd, *J* = 13.9, 5.6, 2.9 Hz, 1H), 2.33 – 2.24 (m, 2H), 2.11 (dtd, *J* = 20.4, 13.6, 2.6 Hz, 3H), 1.92 (dtd, *J* = 14.9, 7.1, 3.5 Hz, 1H), 1.72 – 1.60 (m, 1H), 1.53 – 1.43 (m, 1H), 1.40 (s, 3H), 1.35 (s, 3H);

<sup>13</sup>C NMR (151 MHz, CDCl<sub>3</sub>) δ 210.5, 109.1, 78.8, 67.3, 44.1, 42.4, 41.4, 27.2, 26.5, 25.4, 24.9;

HRMS: (ESI) calcd for C<sub>11</sub>H<sub>19</sub>O<sub>3</sub><sup>+</sup>[M+H]<sup>+</sup> 199.1329; found 199.1328.

**(S)-1-(4-(2,2-dimethyl-1,3-dioxan-4-yl)phenyl)ethan-1-one (5aa)**

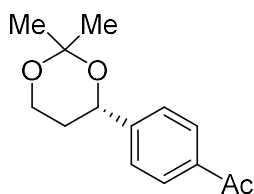

Chemical Formula: C<sub>14</sub>H<sub>18</sub>O<sub>3</sub>

Exact Mass: 234.1256

**5aa** was prepared according to general procedure **2.2** using NiBr<sub>2</sub>•dme (6.2 mg, 0.02 mmol, 10 mol%), **L6** (11.7 mg, 0.03 mmol, 15 mol%), anhydrous acetone (0.5 mL), 1-(4-bromophenyl)ethan-1-one (39.8 mg, 0.20 mmol, 1 equiv), TBADT (33.5 mg, 0.02 mmol, 5 mol%), 2,2-dimethyl-1,3-dioxane **4a** (232.4 mg, 2.0 mmol, 10 equiv), K<sub>3</sub>PO<sub>4</sub> (63.6 mg, 0.3 mmol, 1.5 equiv) and PhCF<sub>3</sub> (0.5 mL) and was purified by silica gel column chromatography (PE/EtOAc = 10/1) to obtain **5aa** as colorless oil (29.0 mg, 62% yield, 91% ee).

<sup>1</sup>H NMR (600 MHz, CDCl<sub>3</sub>) δ 7.96 – 7.94 (m, 2H), 7.49 – 7.46 (m, 2H), 5.00 (dd, *J* = 11.7, 2.8 Hz, 1H), 4.15 (td, *J* = 12.2, 2.7 Hz, 1H), 3.94 (ddd, *J* = 11.8, 5.3, 1.6 Hz, 1H), 2.60 (s, 3H), 1.90 – 1.81 (m, 1H), 1.75 – 1.67 (m, 1H), 1.58 (s, 3H), 1.51 (s, 3H);

<sup>13</sup>C NMR (151 MHz, CDCl<sub>3</sub>) δ 197.8, 147.7, 136.4, 128.6, 125.9, 98.9, 70.9, 60.0, 33.4, 30.0, 26.6, 19.2;

HRMS: (APCI) calcd for C<sub>14</sub>H<sub>19</sub>O<sub>3</sub><sup>+</sup>[M+H]<sup>+</sup> 235.1329; found 235.1320.

The enantiomeric purity was established by HPLC analysis using a chiral column: AD-H column, 30 °C, <sup>n</sup>Hexane/<sup>i</sup>Propanol = 90/10 as eluent, 246 nm, 1 mL/min. t<sub>R</sub> = 12.6 min (major), 11.9 min (minor).

Optical Rotation: [α]<sub>D</sub><sup>24</sup> -7.5 (c 0.2, <sup>i</sup>PrOH) for 91% ee.

Absolute stereochemistry was determined through analogy with **5ag**.

<Chromatogram>

mAU

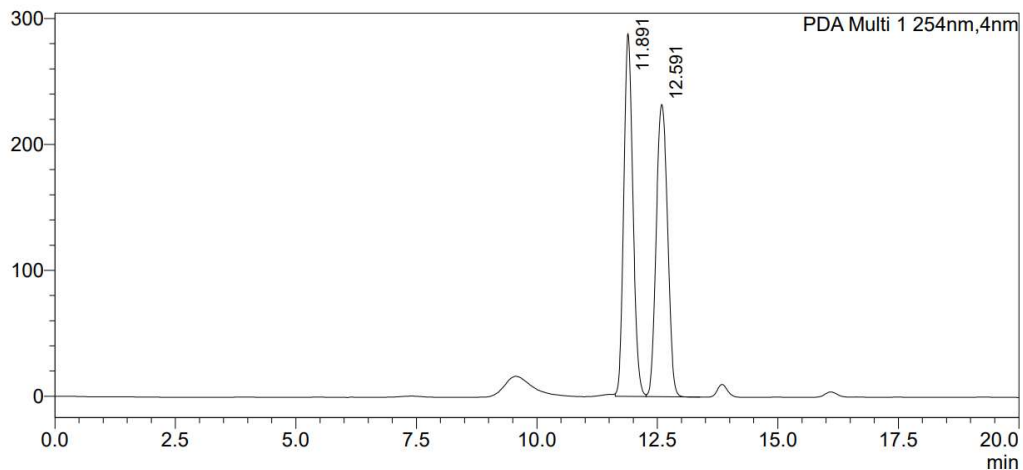

<Peak Table>

PDA Ch1 254nm

| Peak# | Ret. Time | Area    | Height | Conc. | Unit | Mark | Name |
|-------|-----------|---------|--------|-------|------|------|------|
| 1     | 11.891    | 3811874 | 288191 | 0.000 |      | M    |      |
| 2     | 12.591    | 3806980 | 232106 | 0.000 |      | V M  |      |
| Total |           | 7618853 | 520297 |       |      |      |      |

Supplementary Figure 51. HPLC spectrum of racemic-5aa

<Chromatogram>

mAU

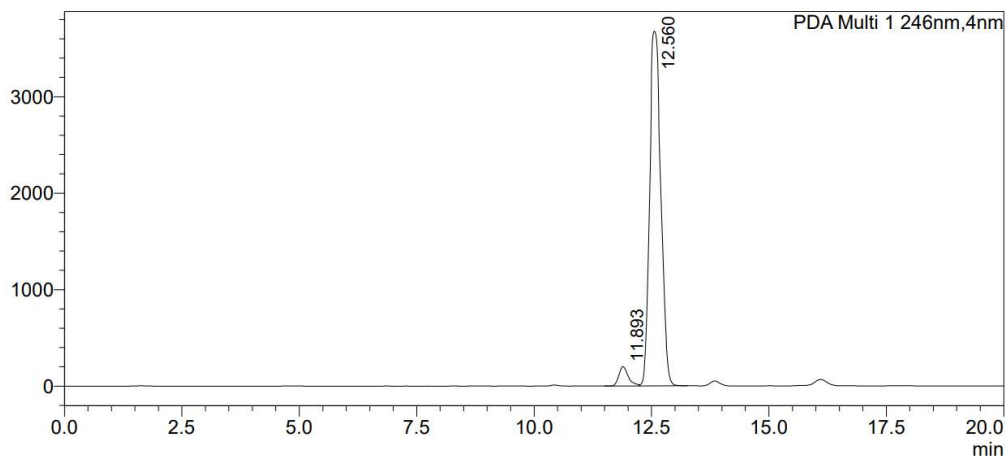

<Peak Table>

PDA Ch1 246nm

| Peak# | Ret. Time | Area     | Height  | Conc.  | Unit | Mark | Name |
|-------|-----------|----------|---------|--------|------|------|------|
| 1     | 11.893    | 2822812  | 201075  | 4.432  |      | M    |      |
| 2     | 12.560    | 60875398 | 3673934 | 95.568 |      | V M  |      |
| Total |           | 63698210 | 3875009 |        |      |      |      |

Supplementary Figure 52. HPLC spectrum of (S)-5aa

**(S)-2,2-dimethyl-4-(4-(trifluoromethyl)phenyl)-1,3-dioxane (5ac)**

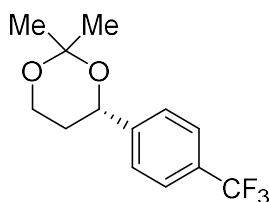

Chemical Formula: C<sub>13</sub>H<sub>15</sub>F<sub>3</sub>O<sub>2</sub>

Exact Mass: 260.1024

**5ac** was prepared according to general procedure **2.2** using NiBr<sub>2</sub>•dme (6.2 mg, 0.02 mmol, 10 mol%), **L6** (11.7 mg, 0.03 mmol, 15 mol%), anhydrous acetone (0.5 mL), 1-bromo-4-(trifluoromethyl)benzene (45.0 mg, 0.20 mmol, 1 equiv), TBADT (33.5 mg, 0.02 mmol, 5 mol%), 2,2-dimethyl-1,3-dioxane **4a** (232.4 mg, 2.0 mmol, 10 equiv), K<sub>3</sub>PO<sub>4</sub> (63.6 mg, 0.3 mmol, 1.5 equiv) and PhCF<sub>3</sub> (0.5 mL) and was purified by silica gel column chromatography (PE/EtOAc = 50/1) to obtain **5ac** as colorless oil (21.8 mg, 42% yield, 95% ee).

<sup>1</sup>H NMR (600 MHz, CDCl<sub>3</sub>) δ 7.54 (d, *J* = 8.0 Hz, 2H), 7.42 (d, *J* = 8.0 Hz, 2H), 4.92 (dd, *J* = 11.8, 2.7 Hz, 1H), 4.07 (td, *J* = 12.2, 2.6 Hz, 1H), 3.87 (dd, *J* = 11.9, 5.2 Hz, 1H), 1.78 (qd, *J* = 12.5, 5.2 Hz, 1H), 1.65 – 1.60 (m, 1H), 1.51 (s, 3H), 1.44 (s, 3H);

<sup>13</sup>C NMR (151 MHz, CDCl<sub>3</sub>) δ 146.4, 129.8 (q, *J* = 32.3 Hz), 126.2, 125.4 (q, *J* = 3.8 Hz), 124.2 (q, *J* = 271.9 Hz), 98.9, 70.8, 60.0, 33.4, 30.0, 19.2;

<sup>19</sup>F NMR (565 MHz, CDCl<sub>3</sub>) δ -62.50.

HRMS: (ESI) calcd for C<sub>13</sub>H<sub>16</sub>F<sub>3</sub>O<sub>2</sub><sup>+</sup>[M+H]<sup>+</sup> 261.1097; found 261.1102.

The enantiomeric purity was established by HPLC analysis using a chiral column: OJ-H column, 30 °C, <sup>n</sup>Hexane/<sup>i</sup>Propanol = 98/2 as eluent, 190 nm, 0.5 mL/min. t<sub>R</sub> = 11.5 min (major), 10.2 min (minor).

Optical Rotation: [α]<sub>D</sub><sup>24</sup> -18.8 (c 0.1, <sup>i</sup>PrOH) for 95% ee.

Absolute stereochemistry was determined through analogy with **5ag**.

<Chromatogram>

mAU

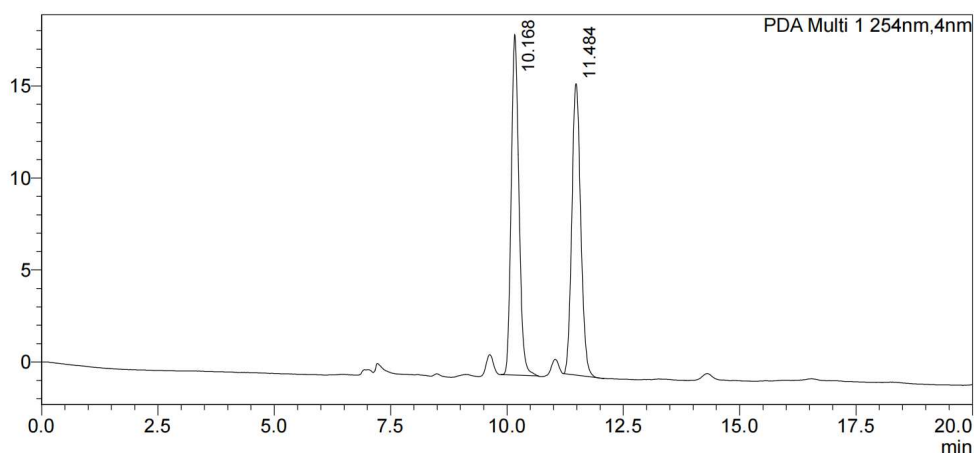

<Peak Table>

PDA Ch1 254nm

| Peak# | Ret. Time | Area   | Height | Conc. | Unit | Mark | Name |
|-------|-----------|--------|--------|-------|------|------|------|
| 1     | 10.168    | 214332 | 18516  | 0.000 |      | M    |      |
| 2     | 11.484    | 211341 | 15843  | 0.000 |      | M    |      |
| Total |           | 425674 | 34359  |       |      |      |      |

Supplementary Figure 53. HPLC spectrum of racemic-5ac

<Chromatogram>

mAU

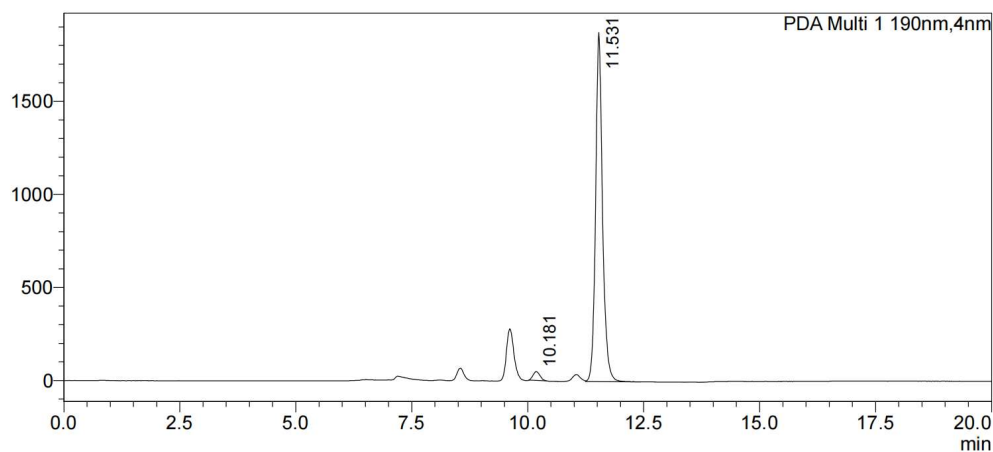

<Peak Table>

PDA Ch1 190nm

| Peak# | Ret. Time | Area     | Height  | Conc. | Unit | Mark | Name |
|-------|-----------|----------|---------|-------|------|------|------|
| 1     | 10.181    | 489420   | 47266   | 0.000 |      | M    |      |
| 2     | 11.531    | 19508985 | 1874902 | 0.000 |      | M    |      |
| Total |           | 19998405 | 1922169 |       |      |      |      |

Supplementary Figure 54. HPLC spectrum of (S)-5ac

**ethyl (S)-4-(2,2-dimethyl-1,3-dioxan-4-yl)benzoate (5ad)**

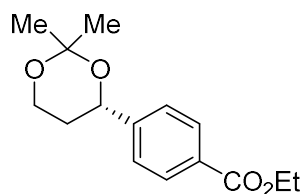

Chemical Formula: C<sub>15</sub>H<sub>20</sub>O<sub>4</sub>

Exact Mass: 264.1362

**5ad** was prepared according to general procedure **2.2** using NiBr<sub>2</sub>•dme (6.2 mg, 0.02 mmol, 10 mol%), **L6** (11.7 mg, 0.03 mmol, 15 mol%), anhydrous acetone (0.5 mL), ethyl 4-bromobenzoate (45.8 mg, 0.20 mmol, 1 equiv), TBADT (33.5 mg, 0.02 mmol, 5 mol%), 2,2-dimethyl-1,3-dioxane **4a** (232.4 mg, 2.0 mmol, 10 equiv), K<sub>3</sub>PO<sub>4</sub> (63.6 mg, 0.3 mmol, 1.5 equiv) and PhCF<sub>3</sub> (0.5 mL) and was purified by silica gel column chromatography (PE/EtOAc = 15/1) to obtain **5ad** as colorless oil (21.1 mg, 40% yield, 91% ee).

<sup>1</sup>H NMR (600 MHz, CDCl<sub>3</sub>) δ 7.95 (d, *J* = 8.2 Hz, 2H), 7.37 (d, *J* = 8.0 Hz, 2H), 4.92 (dd, *J* = 11.6, 2.7 Hz, 1H), 4.30 (q, *J* = 7.2 Hz, 2H), 4.07 (td, *J* = 12.2, 2.5 Hz, 1H), 3.86 (dd, *J* = 11.9, 5.1 Hz, 1H), 1.78 (qd, *J* = 12.5, 5.2 Hz, 1H), 1.62 – 1.57 (m, 1H), 1.55 (s, 3H), 1.44 (s, 3H), 1.32 (t, *J* = 7.2 Hz, 3H);

<sup>13</sup>C NMR (151 MHz, CDCl<sub>3</sub>) δ 166.5, 147.4, 129.8, 129.7, 125.7, 98.9, 71.0, 61.0, 60.0, 33.4, 30.0, 19.2, 14.3;

HRMS: (APCI) calcd for C<sub>15</sub>H<sub>21</sub>O<sub>4</sub><sup>+</sup>[M+H]<sup>+</sup> 265.1434; found 265.1434.

The enantiomeric purity was established by HPLC analysis using a chiral column: OJ-H column, 30 °C, <sup>n</sup>Hexane/<sup>i</sup>Propanol = 95/5 as eluent, 224 nm, 1 mL/min. t<sub>R</sub> = 9.0 min (major), 9.9 min (minor).

Optical Rotation: [α]<sub>D</sub><sup>24</sup> -41.6 (c 0.1, <sup>i</sup>PrOH) for 91% ee.

Absolute stereochemistry was determined through analogy with **5ag**.

<Chromatogram>

mAU

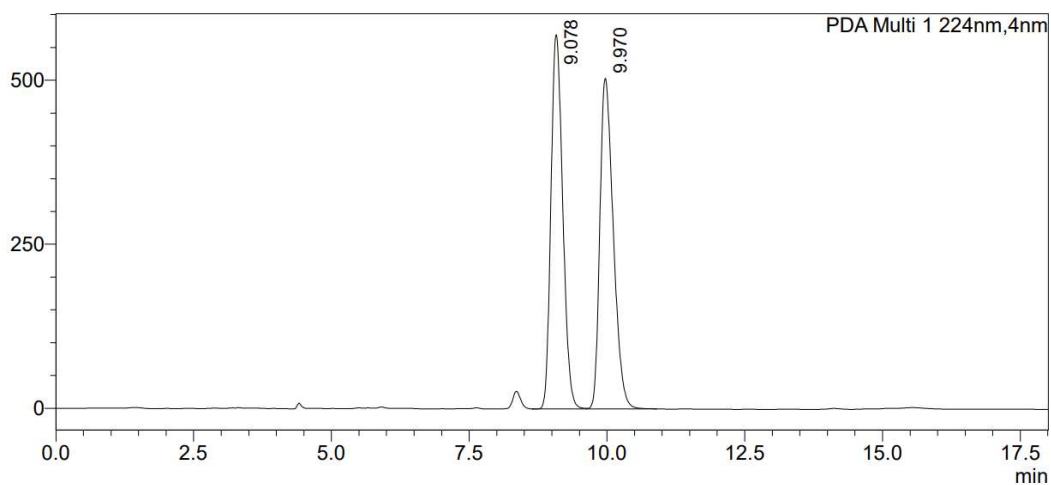

<Peak Table>

PDA Ch1 224nm

| Peak# | Ret. Time | Area     | Height  | Conc. | Unit | Mark | Name |
|-------|-----------|----------|---------|-------|------|------|------|
| 1     | 9.078     | 8492705  | 570304  | 0.000 |      | M    |      |
| 2     | 9.970     | 8549454  | 503686  | 0.000 |      | V M  |      |
| Total |           | 17042158 | 1073990 |       |      |      |      |

Supplementary Figure 55. HPLC spectrum of racemic-5ad

<Chromatogram>

mAU

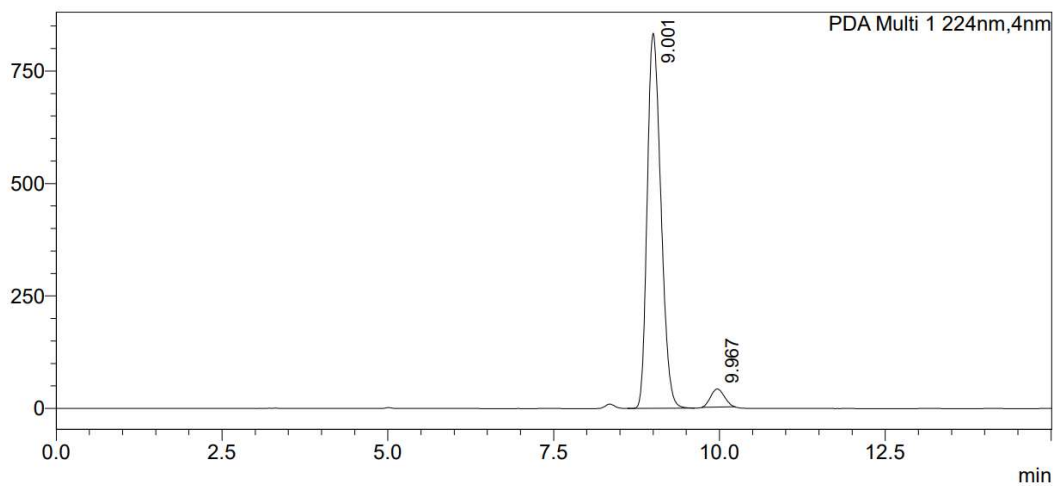

<Peak Table>

PDA Ch1 224nm

| Peak# | Ret. Time | Area     | Height | Conc. | Unit | Mark | Name |
|-------|-----------|----------|--------|-------|------|------|------|
| 1     | 9.001     | 11959963 | 833786 | 0.000 |      | M    |      |
| 2     | 9.967     | 575323   | 40062  | 0.000 |      | M    |      |
| Total |           | 12535286 | 873848 |       |      |      |      |

Supplementary Figure 56. HPLC spectrum of (S)-5ad

**(S)-4-(4-chlorophenyl)-2,2-dimethyl-1,3-dioxane (5af)**

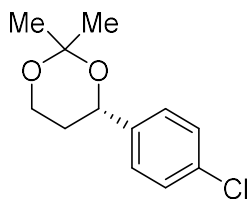

Chemical Formula: C<sub>12</sub>H<sub>15</sub>ClO<sub>2</sub>

Exact Mass: 226.0761

**5af** was prepared according to general procedure **2.2** using NiBr<sub>2</sub>•dme (6.2 mg, 0.02 mmol, 10 mol%), **L6** (11.7 mg, 0.03 mmol, 15 mol%), anhydrous acetone (0.5 mL), 1-bromo-4-chlorobenzene (38.2 mg, 0.20 mmol, 1 equiv), TBADT (33.5 mg, 0.02 mmol, 5 mol%), 2,2-dimethyl-1,3-dioxane **4a** (232.4 mg, 2.0 mmol, 10 equiv), K<sub>3</sub>PO<sub>4</sub> (63.6 mg, 0.3 mmol, 1.5 equiv) and PhCF<sub>3</sub> (0.5 mL) and was purified by silica gel column chromatography (PE/EtOAc = 50/1) to obtain **5af** as colorless oil (28.5 mg, 63% yield, 84% ee).

<sup>1</sup>H NMR (600 MHz, CDCl<sub>3</sub>) δ 7.24 (d, *J* = 1.7 Hz, 4H), 4.83 (dt, *J* = 11.9, 2.2 Hz, 1H), 4.08 – 4.01 (m, 1H), 3.88 – 3.82 (m, 1H), 1.82 – 1.72 (m, 1H), 1.62 – 1.55 (m, 1H), 1.50 (s, 3H), 1.42 (s, 3H);

<sup>13</sup>C NMR (151 MHz, CDCl<sub>3</sub>) δ 141.0, 133.2, 128.6, 127.3, 98.9, 70.8, 60.0, 33.5, 30.1, 19.2;

HRMS: (APCI) calcd for C<sub>12</sub>H<sub>16</sub>ClO<sub>2</sub><sup>+</sup>[M+H]<sup>+</sup> 227.0833; found 227.0827.

The enantiomeric purity was established by HPLC analysis using a chiral column: OJ-H column, 30 °C, <sup>n</sup>Hexane/<sup>i</sup>Propanol = 97/3 as eluent, 224 nm, 1 mL/min. tR = 10.2 min (major), 7.1 min (minor).

Optical Rotation: [α]<sub>D</sub><sup>26</sup> -5.7 (c 0.1, <sup>i</sup>PrOH) for 84% ee.

Absolute stereochemistry was determined through analogy with **5ag**.



<Chromatogram>

mAU

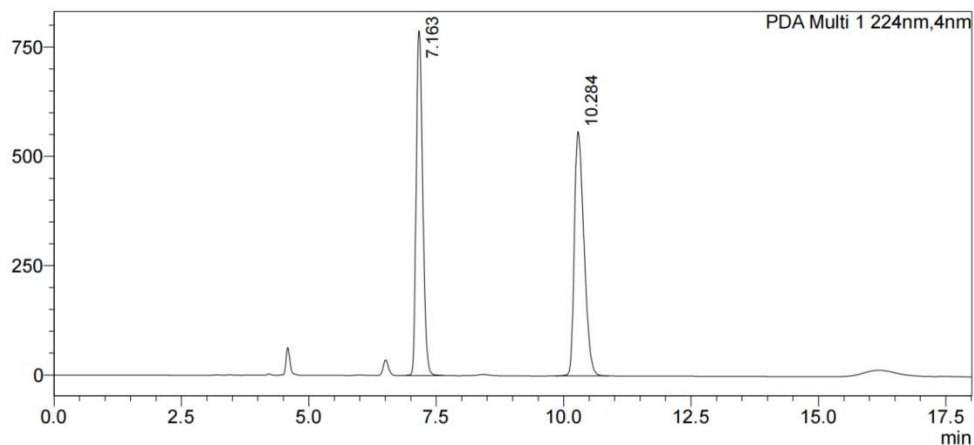

<Peak Table>

PDA Ch1 224nm

| Peak# | Ret. Time | Area     | Height  | Conc. | Unit | Mark | Name |
|-------|-----------|----------|---------|-------|------|------|------|
| 1     | 7.163     | 7007918  | 788473  | 0.000 |      | M    |      |
| 2     | 10.284    | 7362535  | 558830  | 0.000 |      | M    |      |
| Total |           | 14370453 | 1347303 |       |      |      |      |

Supplementary Figure 57. HPLC spectrum of racemic-5af

<Chromatogram>

mAU

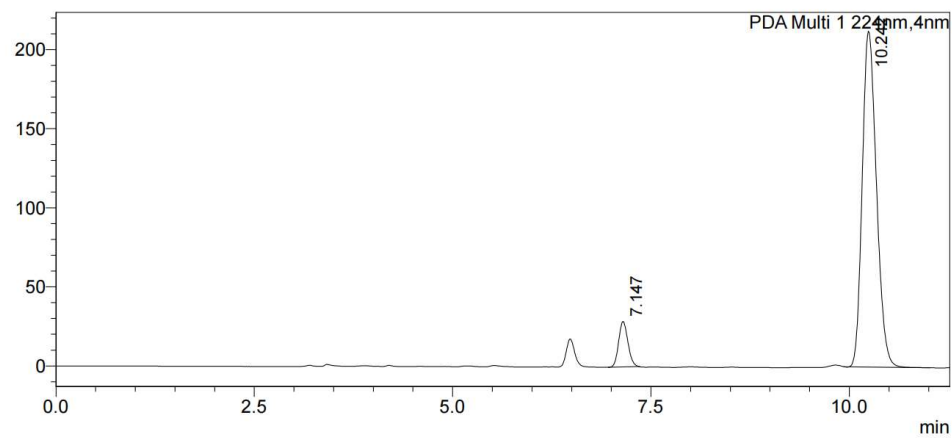

<Peak Table>

PDA Ch1 224nm

| Peak# | Ret. Time | Area    | Height | Conc. | Unit | Mark | Name |
|-------|-----------|---------|--------|-------|------|------|------|
| 1     | 7.147     | 234080  | 28857  | 0.000 |      | M    |      |
| 2     | 10.242    | 2641777 | 212348 | 0.000 |      | M    |      |
| Total |           | 2875857 | 241205 |       |      |      |      |

Supplementary Figure 58. HPLC spectrum of (S)-5af

**(S)-2,2-dimethyl-4-(4-(methylsulfonyl)phenyl)-1,3-dioxane (5ag)**

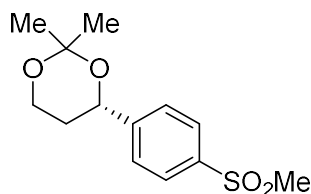

Chemical Formula: C<sub>13</sub>H<sub>18</sub>O<sub>4</sub>S

Exact Mass: 270.0926

**5ag** was prepared according to general procedure **2.2** using NiBr<sub>2</sub>•dme (6.2 mg, 0.02 mmol, 10 mol%), **L6** (11.7 mg, 0.03 mmol, 15 mol%), anhydrous acetone (0.5 mL), 1-bromo-4-(methylsulfonyl)benzene (47.0 mg, 0.20 mmol, 1 equiv), TBADT (33.5 mg, 0.02 mmol, 5 mol%), 2,2-dimethyl-1,3-dioxane **4a** (232.4 mg, 2.0 mmol, 10 equiv), K<sub>3</sub>PO<sub>4</sub> (63.6 mg, 0.3 mmol, 1.5 equiv) and PhCF<sub>3</sub> (0.5 mL) and was purified by silica gel column chromatography (PE/EtOAc = 2/1) to obtain **5ag** as white solid (36.7 mg, 68% yield, 92% ee).

<sup>1</sup>H NMR (600 MHz, CDCl<sub>3</sub>) δ 7.95 – 7.91 (m, 2H), 7.59 (d, *J* = 8.1 Hz, 2H), 5.03 (dd, *J* = 11.7, 2.8 Hz, 1H), 4.15 (td, *J* = 12.2, 2.8 Hz, 1H), 3.95 (ddd, *J* = 11.8, 5.2, 1.6 Hz, 1H), 3.03 (s, 3H), 1.88 – 1.80 (m, 1H), 1.75 – 1.70 (m, 1H), 1.58 (s, 3H), 1.51 (s, 3H);

<sup>13</sup>C NMR (151 MHz, CDCl<sub>3</sub>) δ 148.7, 139.6, 127.6, 126.8, 99.0, 70.7, 59.9, 44.6, 33.4, 30.0, 19.2;

HRMS: (APCI) calcd for C<sub>13</sub>H<sub>19</sub>O<sub>4</sub>S<sup>+</sup>[M+H]<sup>+</sup> 271.0999; found 271.1002.

The enantiomeric purity was established by HPLC analysis using a chiral column: AD-H column, 30 °C, <sup>n</sup>Hexane/<sup>n</sup>Propanol = 90/10 as eluent, 254 nm, 1 mL/min. t<sub>R</sub> = 14.5 min (major), 15.9 min (minor).

Optical Rotation: [α]<sub>D</sub><sup>22</sup> -38.5 (c 0.2, MeCN) for 92% ee.

<Chromatogram>

mAU

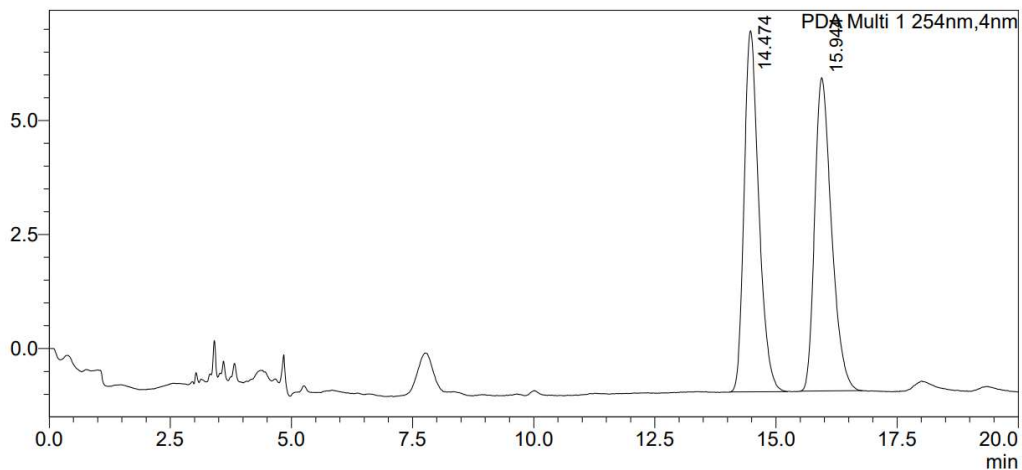

<Peak Table>

| Peak# | Ret. Time | Area   | Height | Conc.  | Unit | Mark | Name |
|-------|-----------|--------|--------|--------|------|------|------|
| 1     | 14.474    | 167364 | 7916   | 50.177 |      |      |      |
| 2     | 15.944    | 166185 | 6869   | 49.823 |      |      |      |
| Total |           | 333549 | 14785  |        |      |      |      |

Supplementary Figure 59. HPLC spectrum of racemic-5ag

<Chromatogram>

mAU

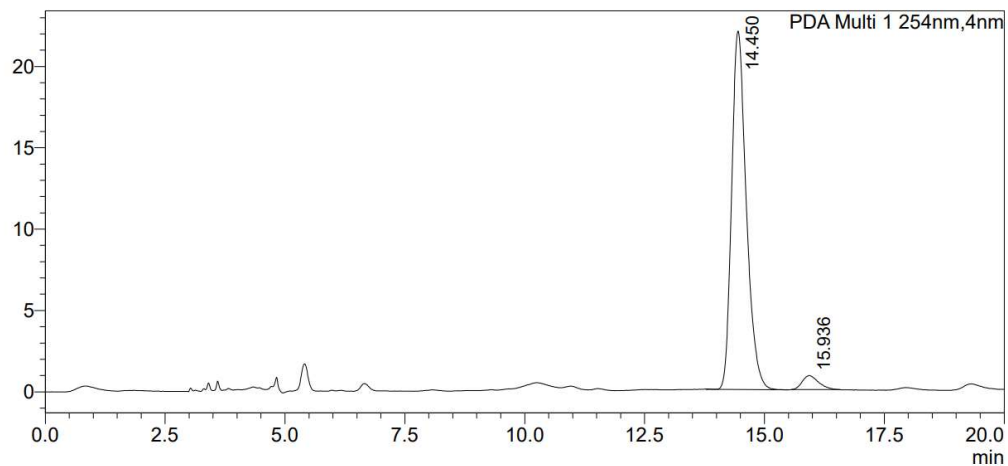

<Peak Table>

| Peak# | Ret. Time | Area   | Height | Conc. | Unit | Mark | Name |
|-------|-----------|--------|--------|-------|------|------|------|
| 1     | 14.450    | 468617 | 22024  | 0.000 |      | M    |      |
| 2     | 15.936    | 20145  | 857    | 0.000 |      | M    |      |
| Total |           | 488762 | 22881  |       |      |      |      |

Supplementary Figure 60. HPLC spectrum of (S)-5ag

**(S)-2,2-dimethyl-4-(4-(trifluoromethoxy)phenyl)-1,3-dioxane (5ai)**

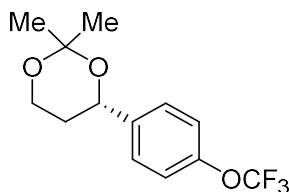

Chemical Formula: C<sub>13</sub>H<sub>15</sub>F<sub>3</sub>O<sub>3</sub>

Exact Mass: 276.0973

**5ai** was prepared according to general procedure **2.2** using NiBr<sub>2</sub>•dme (6.2 mg, 0.02 mmol, 10 mol%), **L6** (11.7 mg, 0.03 mmol, 15 mol%), anhydrous acetone (0.5 mL), 1-bromo-4-(trifluoromethoxy)benzene (48.2 mg, 0.20 mmol, 1 equiv), TBADT (33.5 mg, 0.02 mmol, 5 mol%), 2,2-dimethyl-1,3-dioxane **4a** (232.4 mg, 2.0 mmol, 10 equiv), K<sub>3</sub>PO<sub>4</sub> (63.6 mg, 0.3 mmol, 1.5 equiv) and PhCF<sub>3</sub> (0.5 mL) and was purified by silica gel column chromatography (PE/EtOAc = 40/1) to obtain **5ai** as colorless oil (21.5 mg, 39% yield, 89% ee).

<sup>1</sup>H NMR (600 MHz, CDCl<sub>3</sub>) δ 7.43 – 7.39 (m, 2H), 7.20 (d, *J* = 8.3 Hz, 2H), 4.94 (dd, *J* = 11.7, 2.7 Hz, 1H), 4.13 (td, *J* = 12.2, 2.7 Hz, 1H), 3.93 (ddd, *J* = 11.9, 5.4, 1.6 Hz, 1H), 1.87 (qd, *J* = 12.5, 5.3 Hz, 1H), 1.67 (dq, *J* = 13.2, 2.3 Hz, 1H), 1.58 (s, 3H), 1.50 (s, 3H);

<sup>13</sup>C NMR (151 MHz, CDCl<sub>3</sub>) δ 148.5 (q, *J* = 1.5 Hz), 141.2, 127.4, 121.1, 120.5 (q, *J* = 256.9 Hz), 98.9, 70.8, 60.0, 33.5, 30.1, 19.2;

<sup>19</sup>F NMR (565 MHz, CDCl<sub>3</sub>) δ -57.89

HRMS: (APCI) calcd for C<sub>13</sub>H<sub>16</sub>F<sub>3</sub>O<sub>3</sub><sup>+</sup>[M+H]<sup>+</sup> 277.1046; found 277.1048.

The enantiomeric purity was established by HPLC analysis using a chiral column: OJ-H column, 30 °C, <sup>n</sup>Hexane/<sup>i</sup>Propanol = 99/1 as eluent, 191 nm, 0.5 mL/min. t<sub>R</sub> = 13.0 min (major), 11.5 min (minor).

Optical Rotation: [α]<sub>D</sub><sup>23</sup> -28.4 (c 0.1, <sup>i</sup>PrOH) for 89% ee.

Absolute stereochemistry was determined through analogy with **5ag**.

<Chromatogram>

mAU

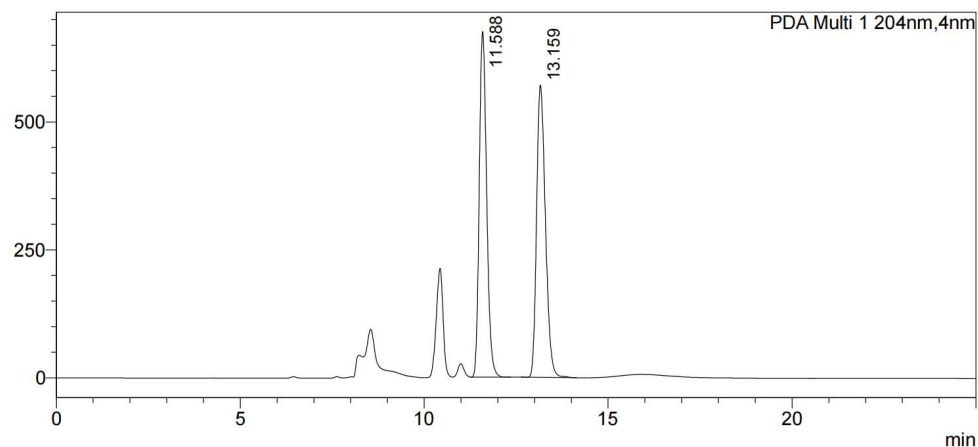

<Peak Table>

PDA Ch1 204nm

| Peak# | Ret. Time | Area     | Height  | Conc. | Unit | Mark | Name |
|-------|-----------|----------|---------|-------|------|------|------|
| 1     | 11.588    | 9451550  | 675058  | 0.000 |      | M    |      |
| 2     | 13.159    | 9526754  | 570771  | 0.000 |      | M    |      |
| Total |           | 18978304 | 1245828 |       |      |      |      |

Supplementary Figure 61. HPLC spectrum of racemic-5ai

<Chromatogram>

mAU

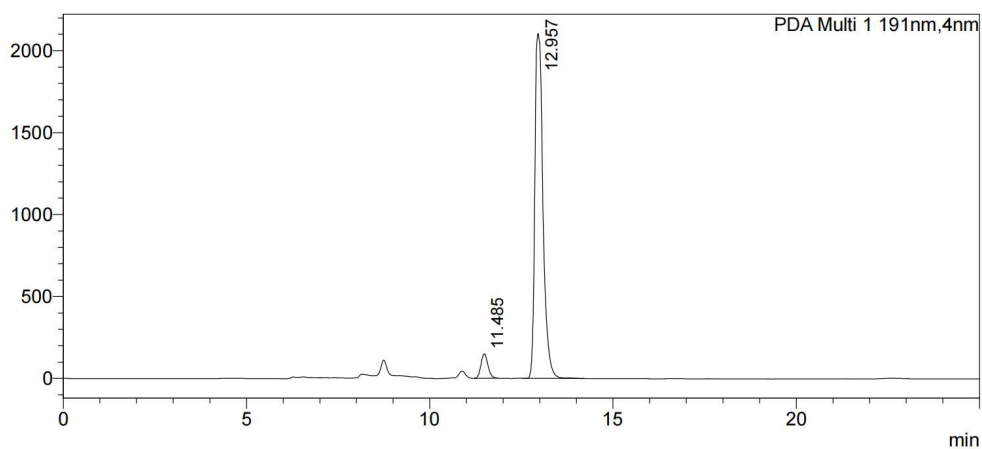

<Peak Table>

PDA Ch1 191nm

| Peak# | Ret. Time | Area     | Height  | Conc.  | Unit | Mark | Name |
|-------|-----------|----------|---------|--------|------|------|------|
| 1     | 11.485    | 1951388  | 149173  | 5.660  |      | M    |      |
| 2     | 12.957    | 32522567 | 2103878 | 94.340 |      | M    |      |
| Total |           | 34473955 | 2253051 |        |      |      |      |

Supplementary Figure 62. HPLC spectrum of (S)-5ai

**(S)-4-(3-chlorophenyl)-2,2-dimethyl-1,3-dioxane (5al)**

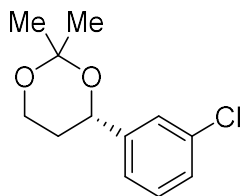

Chemical Formula: C<sub>12</sub>H<sub>15</sub>ClO<sub>2</sub>

Exact Mass: 226.0761

**5al** was prepared according to general procedure **2.2** using NiBr<sub>2</sub>•dme (6.2 mg, 0.02 mmol, 10 mol%), **L6** (11.7 mg, 0.03 mmol, 15 mol%), anhydrous acetone (0.5 mL), 1-bromo-3-chlorobenzene (38.2 mg, 0.20 mmol, 1 equiv), TBADT (33.5 mg, 0.02 mmol, 5 mol%), 2,2-dimethyl-1,3-dioxane **4a** (232.4 mg, 2.0 mmol, 10 equiv), K<sub>3</sub>PO<sub>4</sub> (63.6 mg, 0.3 mmol, 1.5 equiv) and PhCF<sub>3</sub> (0.5 mL) and was purified by silica gel column chromatography (PE/EtOAc = 50/1) to obtain **5al** as colorless oil (28.0 mg, 62% yield, 88% ee).

<sup>1</sup>H NMR (600 MHz, CDCl<sub>3</sub>) δ 7.39 (t, *J* = 1.9 Hz, 1H), 7.27 – 7.22 (m, 3H), 4.91 (dd, *J* = 11.7, 2.8 Hz, 1H), 4.12 (td, *J* = 12.2, 2.7 Hz, 1H), 3.93 (ddd, *J* = 11.8, 5.3, 1.6 Hz, 1H), 1.90 – 1.81 (m, 1H), 1.67 (dtd, *J* = 13.2, 2.7, 1.6 Hz, 1H), 1.57 (s, 3H), 1.50 (s, 3H);

<sup>13</sup>C NMR (151 MHz, CDCl<sub>3</sub>) δ 144.5, 134.4, 129.7, 127.7, 126.2, 124.0, 98.9, 70.8, 60.0, 33.4, 30.0, 19.2;

HRMS: (APCI) calcd for C<sub>12</sub>H<sub>16</sub>ClO<sub>2</sub><sup>+</sup>[M+H]<sup>+</sup> 227.0833; found 227.0827.

The enantiomeric purity was established by HPLC analysis using a chiral column: OJ-H column, 30 °C, "Hexane"/Propanol = 97/3 as eluent, 200 nm, 1 mL/min. t<sub>R</sub> = 6.5 min (major), 9.0 min (minor).

Absolute stereochemistry was determined through analogy with **5ag**.

<Chromatogram>

mAU

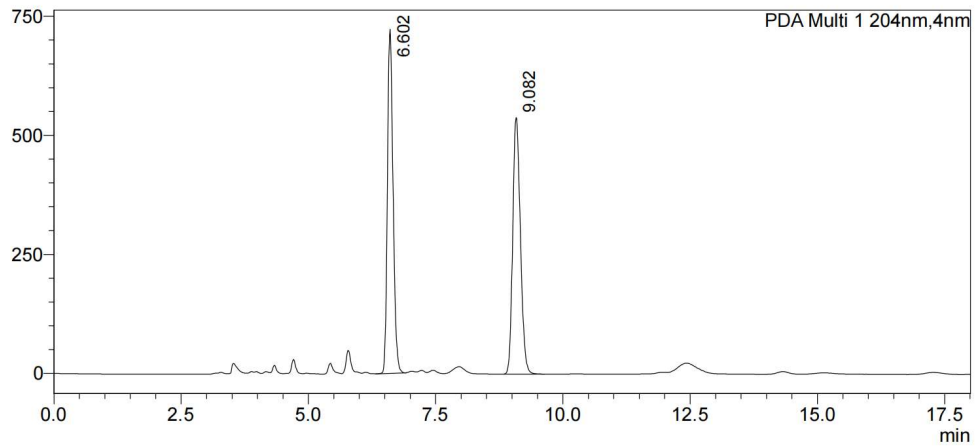

<Peak Table>

PDA Ch1 204nm

| Peak# | Ret. Time | Area     | Height  | Conc. | Unit | Mark | Name |
|-------|-----------|----------|---------|-------|------|------|------|
| 1     | 6.602     | 5567262  | 722126  | 0.000 |      | M    |      |
| 2     | 9.082     | 5655278  | 538406  | 0.000 |      | M    |      |
| Total |           | 11222540 | 1260532 |       |      |      |      |

Supplementary Figure 63. HPLC spectrum of racemic-5al

<Chromatogram>

mAU

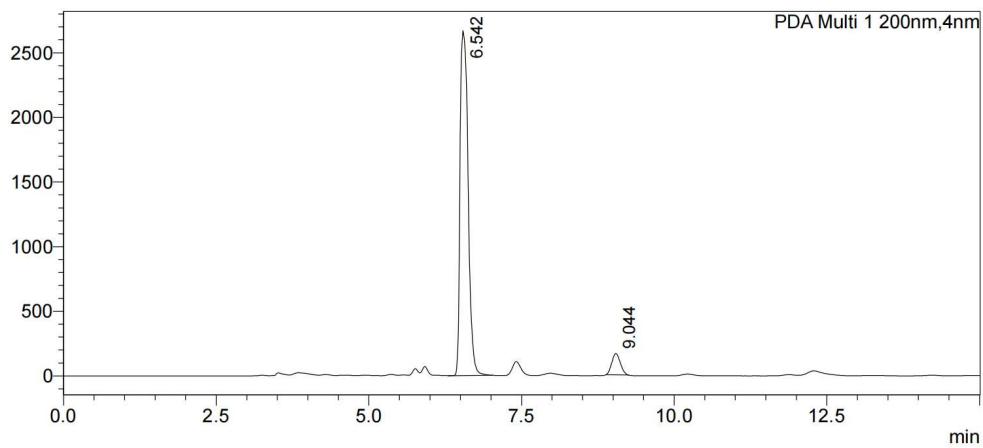

<Peak Table>

PDA Ch1 200nm

| Peak# | Ret. Time | Area     | Height  | Conc. | Unit | Mark | Name |
|-------|-----------|----------|---------|-------|------|------|------|
| 1     | 6.542     | 24402983 | 2667852 | 0.000 |      | M    |      |
| 2     | 9.044     | 1595680  | 164710  | 0.000 |      | M    |      |
| Total |           | 25998663 | 2832562 |       |      |      |      |

Supplementary Figure 64. HPLC spectrum of (S)-5al

**(S)-4-(3,5-bis(trifluoromethyl)phenyl)-2,2-dimethyl-1,3-dioxane (5ao)**

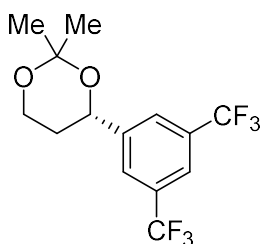

Chemical Formula: C<sub>14</sub>H<sub>14</sub>F<sub>6</sub>O<sub>2</sub>

Exact Mass: 328.0898

**5ao** was prepared according to general procedure **2.2** using NiBr<sub>2</sub>•dme (6.2 mg, 0.02 mmol, 10 mol%), **L6** (11.7 mg, 0.03 mmol, 15 mol%), anhydrous acetone (0.5 mL), 1-bromo-3,5-bis(trifluoromethyl)benzene (58.6 mg, 0.20 mmol, 1 equiv), TBADT (33.5 mg, 0.02 mmol, 5 mol%), 2,2-dimethyl-1,3-dioxane **4a** (232.4 mg, 2.0 mmol, 10 equiv), K<sub>3</sub>PO<sub>4</sub> (63.6 mg, 0.3 mmol, 1.5 equiv) and PhCF<sub>3</sub> (0.5 mL) and was purified by silica gel column chromatography (PE/EtOAc = 50/1) to obtain **5ao** as colorless oil (38.0 mg, 58% yield, 93% ee).

<sup>1</sup>H NMR (600 MHz, CDCl<sub>3</sub>) δ 7.83 (d, *J* = 1.6 Hz, 2H), 7.79 (s, 1H), 5.06 (dd, *J* = 11.6, 3.0 Hz, 1H), 4.15 (td, *J* = 12.1, 2.9 Hz, 1H), 3.96 (ddd, *J* = 11.9, 5.2, 1.7 Hz, 1H), 1.84 (dtd, *J* = 13.1, 11.9, 5.2 Hz, 1H), 1.76 (dtd, *J* = 13.2, 2.9, 1.7 Hz, 1H), 1.58 (s, 3H), 1.53 (s, 3H);

<sup>13</sup>C NMR (151 MHz, CDCl<sub>3</sub>) δ 145.0, 131.7 (q, *J* = 33.2 Hz), 126.1 (q, *J* = 4.9, 4.1 Hz), 123.3 (q, *J* = 272.5 Hz), 121.5 (p, *J* = 3.9 Hz), 99.2, 70.2, 59.8, 33.3, 29.9, 19.1;

<sup>19</sup>F NMR (575 MHz, CDCl<sub>3</sub>) δ -62.82.

HRMS: (APCI) calcd for C<sub>14</sub>H<sub>15</sub>F<sub>6</sub>O<sub>2</sub><sup>+</sup>[M+H]<sup>+</sup> 329.0971; found 329.0962.

The enantiomeric purity was established by HPLC analysis using a chiral column: OD-H column, 30 °C, <sup>n</sup>Hexane/<sup>i</sup>Propanol = 99/1 as eluent, 254 nm, 0.5 mL/min. t<sub>R</sub> = 8.5 min (major), 8.0 min (minor).

Optical Rotation: [α]<sub>D</sub><sup>25</sup> -121.6 (c 0.1, <sup>i</sup>PrOH) for 93% ee.

Absolute stereochemistry was determined through analogy with **5ag**.



<Chromatogram>

mAU

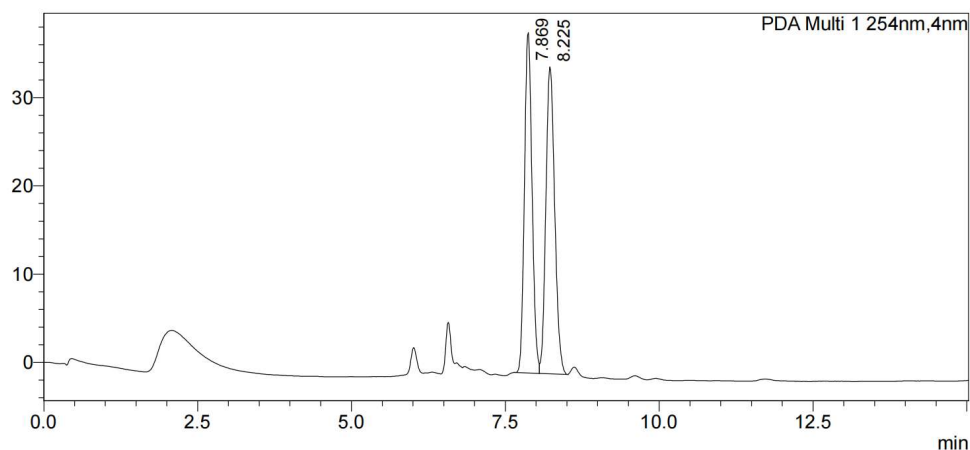

<Peak Table>

PDA Ch1 254nm

| Peak# | Ret. Time | Area   | Height | Conc. | Unit | Mark | Name |
|-------|-----------|--------|--------|-------|------|------|------|
| 1     | 7.869     | 331433 | 38530  | 0.000 |      | M    |      |
| 2     | 8.225     | 347239 | 34744  | 0.000 |      | V M  |      |
| Total |           | 678672 | 73274  |       |      |      |      |

Supplementary Figure 65. HPLC spectrum of racemic-5ao

<Chromatogram>

mAU

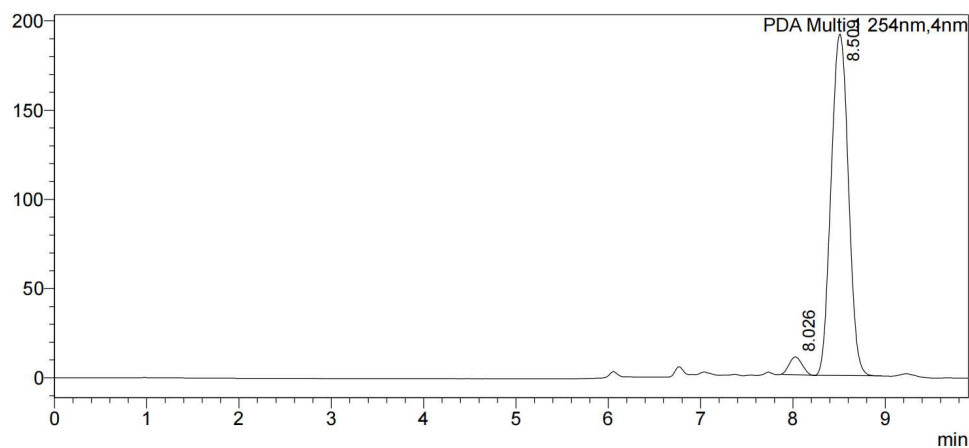

<Peak Table>

PDA Ch1 254nm

| Peak# | Ret. Time | Area    | Height | Conc. | Unit | Mark | Name |
|-------|-----------|---------|--------|-------|------|------|------|
| 1     | 8.026     | 97120   | 9985   | 0.000 |      | M    |      |
| 2     | 8.509     | 2494123 | 191390 | 0.000 |      | M    |      |
| Total |           | 2591243 | 201375 |       |      |      |      |

Supplementary Figure 66. HPLC spectrum of (S)-5ao

**(S)-5-(2,2-dimethyl-1,3-dioxan-4-yl)isobenzofuran-1(3H)-one (5aq)**

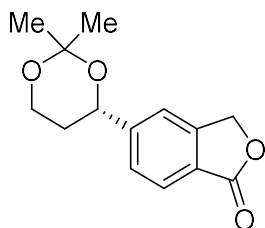

Chemical Formula: C<sub>14</sub>H<sub>16</sub>O<sub>4</sub>  
Exact Mass: 248.1049

**5aq** was prepared according to general procedure **2.2** using NiBr<sub>2</sub>•dme (6.2 mg, 0.02 mmol, 10 mol%), **L6** (11.7 mg, 0.03 mmol, 15 mol%), anhydrous acetone (0.5 mL), 5-bromoisobenzofuran-1(3H)-one (42.6 mg, 0.20 mmol, 1 equiv), TBADT (33.5 mg, 0.02 mmol, 5 mol%), 2,2-dimethyl-1,3-dioxane **4a** (232.4 mg, 2.0 mmol, 10 equiv), K<sub>3</sub>PO<sub>4</sub> (63.6 mg, 0.3 mmol, 1.5 equiv) and PhCF<sub>3</sub> (0.5 mL) and was purified by silica gel column chromatography (PE/EtOAc = 5/1) to obtain **5aq** as colorless oil (21.3 mg, 43% yield, 95% ee).

<sup>1</sup>H NMR (600 MHz, CDCl<sub>3</sub>) δ 7.82 (d, *J* = 7.9 Hz, 1H), 7.50 (s, 1H), 7.42 (d, *J* = 7.8 Hz, 1H), 5.25 (s, 2H), 5.02 – 4.98 (m, 1H), 4.09 (tt, *J* = 12.2, 2.0 Hz, 1H), 3.88 (dd, *J* = 11.9, 5.2 Hz, 1H), 1.77 (qd, *J* = 12.3, 5.1 Hz, 1H), 1.67 (d, *J* = 3.3 Hz, 1H), 1.52 (s, 3H), 1.45 (s, 3H);

<sup>13</sup>C NMR (151 MHz, CDCl<sub>3</sub>) δ 171.0, 149.4, 147.2, 126.9, 125.8, 125.0, 119.3, 99.0, 71.0, 69.7, 59.9, 33.6, 30.0, 19.2;

HRMS: (ESI) calcd for C<sub>14</sub>H<sub>17</sub>O<sub>4</sub><sup>+</sup>[M+H]<sup>+</sup> 249.1121; found 249.1123.

The enantiomeric purity was established by HPLC analysis using a chiral column: AD-H column, 30 °C, <sup>n</sup>Hexane/<sup>i</sup>Propanol = 80/20 as eluent, 204 nm, 1 mL/min. t<sub>R</sub> = 7.3 min (major), 6.9 min (minor).

Optical Rotation: [α]<sub>D</sub><sup>23</sup> -4.5 (c 0.1, <sup>i</sup>PrOH) for 95% ee.

Absolute stereochemistry was determined through analogy with **5ag**.

<Chromatogram>

mAU

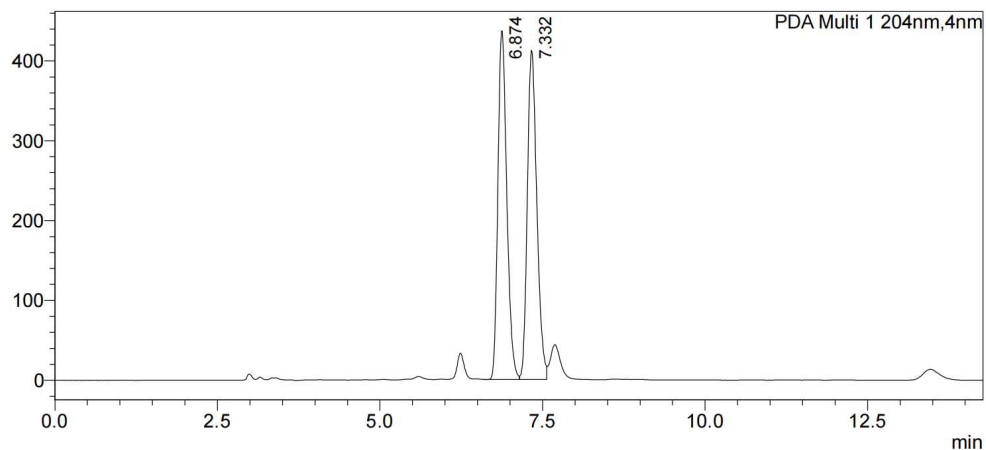

<Peak Table>

PDA Ch1 204nm

| Peak# | Ret. Time | Area    | Height | Conc. | Unit | Mark | Name |
|-------|-----------|---------|--------|-------|------|------|------|
| 1     | 6.874     | 4162748 | 436518 | 0.000 |      | M    |      |
| 2     | 7.332     | 4191976 | 412056 | 0.000 |      | V M  |      |
| Total |           | 8354724 | 848574 |       |      |      |      |

Supplementary Figure 67. HPLC spectrum of racemic-5aq

<Chromatogram>

mAU

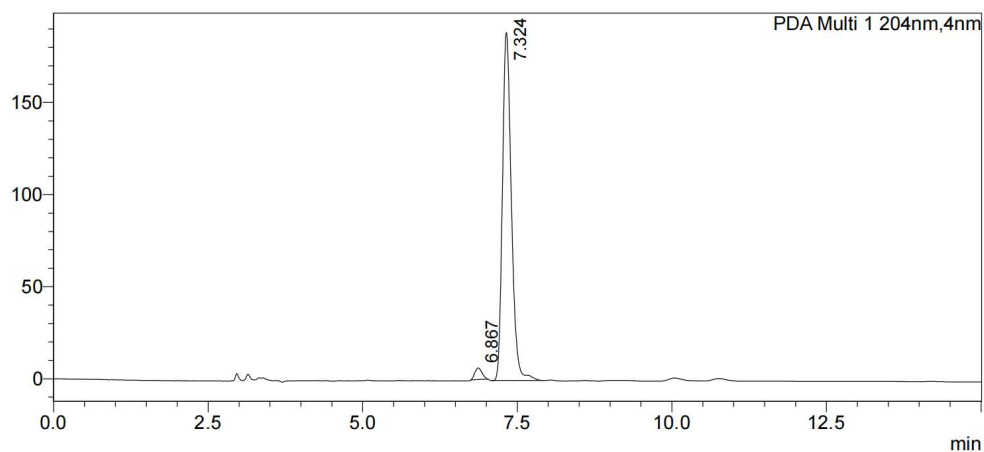

<Peak Table>

PDA Ch1 204nm

| Peak# | Ret. Time | Area    | Height | Conc. | Unit | Mark | Name |
|-------|-----------|---------|--------|-------|------|------|------|
| 1     | 6.867     | 50969   | 6335   | 0.000 |      | M    |      |
| 2     | 7.324     | 1905729 | 188916 | 0.000 |      | M    |      |
| Total |           | 1956698 | 195251 |       |      |      |      |

Supplementary Figure 68. HPLC spectrum of (S)-5aq

**(S)-2-(2,2-dimethyl-1,3-dioxan-4-yl)dibenzo[b,d]furan (5as)**

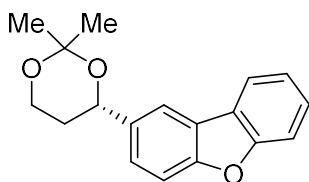

Chemical Formula: C<sub>18</sub>H<sub>18</sub>O<sub>3</sub>

Exact Mass: 282.1256

**5as** was prepared according to general procedure **2.2** using NiBr<sub>2</sub>•dme (6.2 mg, 0.02 mmol, 10 mol%), **L6** (11.7 mg, 0.03 mmol, 15 mol%), anhydrous acetone (0.5 mL), 2-bromodibenzo[b,d]furan (49.4 mg, 0.20 mmol, 1 equiv), TBADT (33.5 mg, 0.02 mmol, 5 mol%), 2,2-dimethyl-1,3-dioxane **4a** (232.4 mg, 2.0 mmol, 10 equiv), K<sub>3</sub>PO<sub>4</sub> (63.6 mg, 0.3 mmol, 1.5 equiv) and PhCF<sub>3</sub> (0.5 mL) and was purified by silica gel column chromatography (PE/EtOAc = 20/1) to obtain **5as** as colorless oil (26.0 mg, 46% yield, 82% ee).

<sup>1</sup>H NMR (600 MHz, CDCl<sub>3</sub>) δ 7.99 (d, *J* = 1.8 Hz, 1H), 7.98 – 7.95 (m, 1H), 7.55 (dd, *J* = 12.2, 8.3 Hz, 2H), 7.48 – 7.44 (m, 2H), 7.34 (td, *J* = 7.5, 1.0 Hz, 1H), 5.10 (dd, *J* = 11.7, 2.8 Hz, 1H), 4.19 (td, *J* = 12.2, 2.6 Hz, 1H), 3.98 (ddd, *J* = 11.8, 5.3, 1.5 Hz, 1H), 2.04 – 1.97 (m, 1H), 1.76 (dtd, *J* = 13.3, 2.7, 1.5 Hz, 1H), 1.63 (s, 3H), 1.55 (s, 3H);

<sup>13</sup>C NMR (151 MHz, CDCl<sub>3</sub>) δ 156.6, 155.7, 137.2, 127.2, 127.1, 125.4, 124.3, 124.2, 122.7, 120.8, 118.2, 111.7, 111.5, 99.0, 71.6, 60.3, 34.0, 30.2, 19.3;

HRMS: (APCI) calcd for C<sub>18</sub>H<sub>19</sub>O<sub>3</sub><sup>+</sup>[M+H]<sup>+</sup> 283.1329; found 283.1321.

The enantiomeric purity was established by HPLC analysis using a chiral column: AD-H column, 30 °C, <sup>n</sup>Hexane/<sup>i</sup>Propanol = 97/3 as eluent, 224 nm, 1 mL/min. t<sub>R</sub> = 5.9 min (major), 6.6 min (minor).

Optical Rotation: [α]<sub>D</sub><sup>21</sup> -6.0 (c 0.1, <sup>i</sup>PrOH) for 82% ee.

Absolute stereochemistry was determined through analogy with **5ag**.

**<Chromatogram>**

mAU

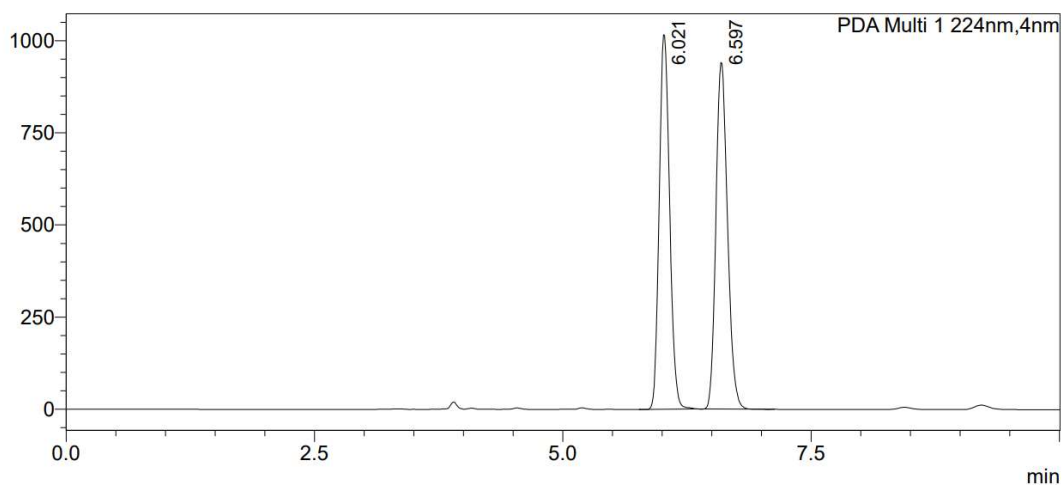

**<Peak Table>**

PDA Ch1 224nm

| Peak# | Ret. Time | Area     | Height  | Conc. | Unit | Mark | Name |
|-------|-----------|----------|---------|-------|------|------|------|
| 1     | 6.021     | 7401953  | 1015779 | 0.000 |      | M    |      |
| 2     | 6.597     | 7644467  | 940212  | 0.000 |      | M    |      |
| Total |           | 15046420 | 1955991 |       |      |      |      |

**Supplementary Figure 69. HPLC spectrum of racemic-5as**

**<Chromatogram>**

mAU

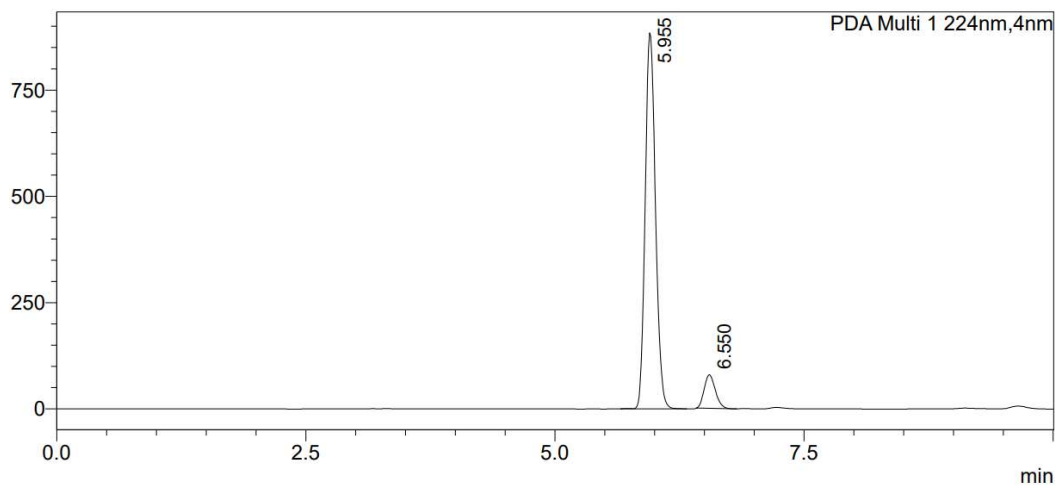

**<Peak Table>**

PDA Ch1 224nm

| Peak# | Ret. Time | Area    | Height | Conc. | Unit | Mark | Name |
|-------|-----------|---------|--------|-------|------|------|------|
| 1     | 5.955     | 6350160 | 884044 | 0.000 |      | M    |      |
| 2     | 6.550     | 617246  | 79281  | 0.000 |      | M    |      |
| Total |           | 6967406 | 963325 |       |      |      |      |

**Supplementary Figure 70. HPLC spectrum of (S)-5as**

**(S)-4-(dibenzo[b,d]thiophen-2-yl)-2,2-dimethyl-1,3-dioxane (5at)**

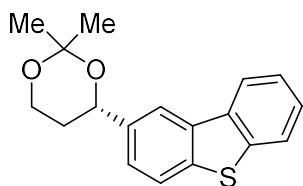

Chemical Formula: C<sub>18</sub>H<sub>18</sub>O<sub>2</sub>S

Exact Mass: 298.1028

**5at** was prepared according to general procedure **2.2** using NiBr<sub>2</sub>•dme (6.2 mg, 0.02 mmol, 10 mol%), **L6** (11.7 mg, 0.03 mmol, 15 mol%), anhydrous acetone (0.5 mL), 2-bromodibenzo[b,d]thiophene (52.6 mg, 0.20 mmol, 1 equiv), TBADT (33.5 mg, 0.02 mmol, 5 mol%), 2,2-dimethyl-1,3-dioxane **4a** (232.4 mg, 2.0 mmol, 10 equiv), K<sub>3</sub>PO<sub>4</sub> (63.6 mg, 0.3 mmol, 1.5 equiv) and PhCF<sub>3</sub> (0.5 mL) and was purified by silica gel column chromatography (PE/EtOAc = 20/1) to obtain **5at** as colorless oil (27.4 mg, 46% yield, 91% ee).

<sup>1</sup>H NMR (600 MHz, CDCl<sub>3</sub>) δ 8.17 (d, *J* = 3.0 Hz, 2H), 7.86 – 7.79 (m, 2H), 7.46 (ddd, *J* = 12.5, 6.4, 1.6 Hz, 3H), 5.11 (dd, *J* = 11.7, 2.8 Hz, 1H), 4.18 (td, *J* = 12.1, 2.6 Hz, 1H), 3.99 – 3.94 (m, 1H), 2.00 (qd, *J* = 12.5, 3.3 Hz, 1H), 1.75 (dq, *J* = 13.2, 2.3 Hz, 1H), 1.63 (s, 3H), 1.56 (s, 3H);

<sup>13</sup>C NMR (151 MHz, CDCl<sub>3</sub>) δ 139.8, 139.0, 138.7, 135.7, 135.5, 126.8, 125.0, 124.4, 122.9, 122.8, 121.7, 119.0, 99.0, 71.6, 60.2, 33.9, 30.2, 19.3;

HRMS: (APCI) calcd for C<sub>18</sub>H<sub>19</sub>O<sub>2</sub>S<sup>+</sup>[M+H]<sup>+</sup> 299.1100; found 299.1092.

The enantiomeric purity was established by HPLC analysis using a chiral column: OD-H column, 30 °C, <sup>n</sup>Hexane/<sup>i</sup>Propanol = 90/10 as eluent, 254 nm, 1 mL/min. tR = 6.0 min (major), 6.5 min (minor).

Optical Rotation: [α]<sub>D</sub><sup>23</sup> -29.6 (c 0.1, <sup>i</sup>PrOH) for 91% ee.

Absolute stereochemistry was determined through analogy with **5ag**.

<Chromatogram>

mAU

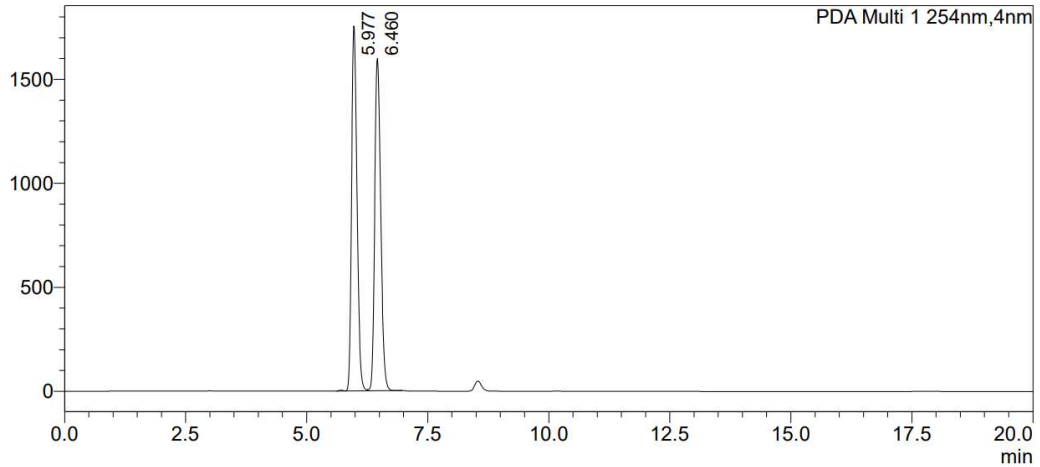

<Peak Table>

PDA Ch1 254nm

| Peak# | Ret. Time | Area     | Height  | Conc. | Unit | Mark | Name |
|-------|-----------|----------|---------|-------|------|------|------|
| 1     | 5.977     | 13666505 | 1753924 | 0.000 |      | M    |      |
| 2     | 6.460     | 13736060 | 1596837 | 0.000 |      | V M  |      |
| Total |           | 27402565 | 3350761 |       |      |      |      |

Supplementary Figure 71. HPLC spectrum of racemic-5at

<Chromatogram>

mAU

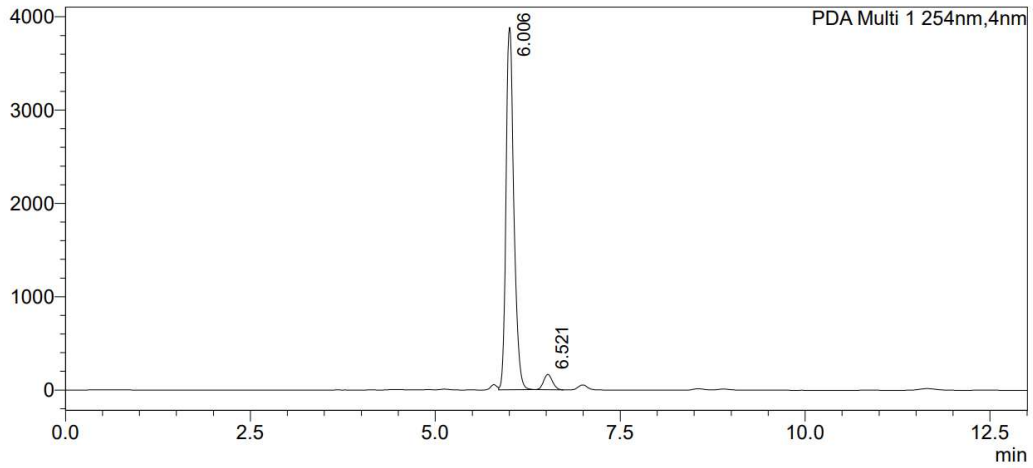

<Peak Table>

PDA Ch1 254nm

| Peak# | Ret. Time | Area     | Height  | Conc. | Unit | Mark | Name |
|-------|-----------|----------|---------|-------|------|------|------|
| 1     | 6.006     | 28678842 | 3882770 | 0.000 |      | M    |      |
| 2     | 6.521     | 1349813  | 164109  | 0.000 |      | M    |      |
| Total |           | 30028654 | 4046878 |       |      |      |      |

Supplementary Figure 72. HPLC spectrum of (S)-5at

**(S)-4-(benzo[b]thiophen-5-yl)-2,2-dimethyl-1,3-dioxane (5au)**

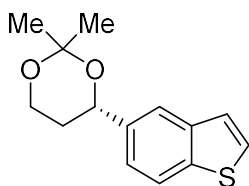

Chemical Formula: C<sub>14</sub>H<sub>16</sub>O<sub>2</sub>S

Exact Mass: 248.0871

**5au** was prepared according to general procedure **2.2** using NiBr<sub>2</sub>•dme (6.2 mg, 0.02 mmol, 10 mol%), **L6** (11.7 mg, 0.03 mmol, 15 mol%), anhydrous acetone (0.5 mL), 5-bromobenzo[b]thiophene (42.6 mg, 0.20 mmol, 1 equiv), TBADT (33.5 mg, 0.02 mmol, 5 mol%), 2,2-dimethyl-1,3-dioxane **4a** (232.4 mg, 2.0 mmol, 10 equiv), K<sub>3</sub>PO<sub>4</sub> (63.6 mg, 0.3 mmol, 1.5 equiv) and PhCF<sub>3</sub> (0.5 mL) and was purified by silica gel column chromatography (PE/EtOAc = 20/1) to obtain **5au** as colorless oil (22.8 mg, 46% yield, 89% ee).

<sup>1</sup>H NMR (600 MHz, CDCl<sub>3</sub>) δ 7.87 – 7.84 (m, 2H), 7.44 (d, *J* = 5.4 Hz, 1H), 7.37 (dd, *J* = 8.2, 1.7 Hz, 1H), 7.33 (d, *J* = 5.4 Hz, 1H), 5.06 (dd, *J* = 11.7, 2.7 Hz, 1H), 4.17 (td, *J* = 12.2, 2.7 Hz, 1H), 3.96 (ddd, *J* = 11.8, 5.3, 1.6 Hz, 1H), 2.02 – 1.93 (m, 1H), 1.73 (dtd, *J* = 13.3, 2.7, 1.5 Hz, 1H), 1.53 (s, 3H);

<sup>13</sup>C NMR (151 MHz, CDCl<sub>3</sub>) δ 139.8, 139.0, 138.7, 126.8, 123.9, 122.6, 122.5, 120.9, 98.9, 71.6, 60.2, 33.8, 30.2, 19.3;

HRMS: (APCI) calcd for C<sub>14</sub>H<sub>17</sub>O<sub>2</sub>S<sup>+</sup>[M+H]<sup>+</sup> 249.0944; found 249.0940.

The enantiomeric purity was established by HPLC analysis using a chiral column: OD-H column, 30 °C, <sup>n</sup>Hexane/<sup>i</sup>Propanol = 98/2 as eluent, 214 nm, 1 mL/min. t<sub>R</sub> = 6.7 min (major), 7.2 min (minor).

Optical Rotation: [α]<sub>D</sub><sup>25</sup> -2.6 (c 0.1, <sup>i</sup>PrOH) for 89% ee.

Absolute stereochemistry was determined through analogy with **5ag**.



<Chromatogram>

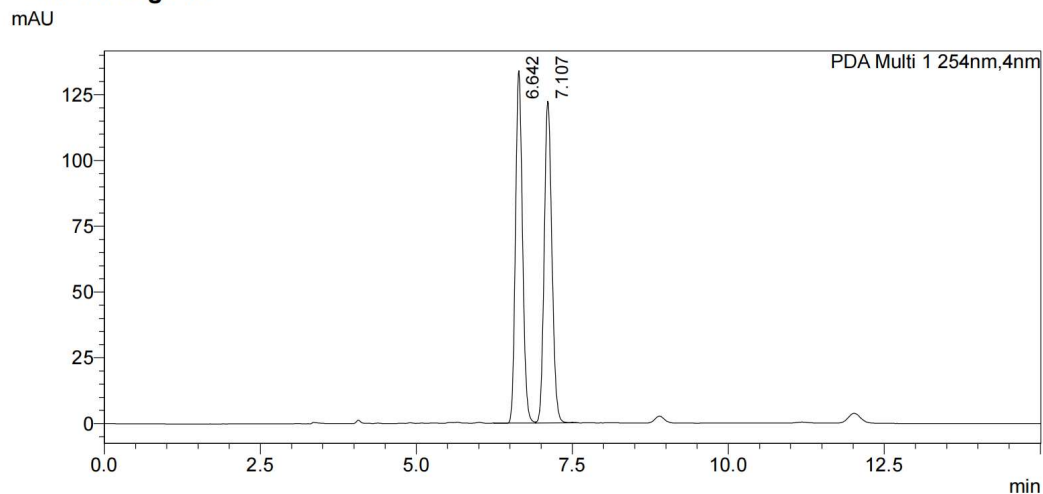

<Peak Table>

PDA Ch1 254nm

| Peak# | Ret. Time | Area    | Height | Conc. | Unit | Mark | Name |
|-------|-----------|---------|--------|-------|------|------|------|
| 1     | 6.642     | 1044580 | 133912 | 0.000 |      | M    |      |
| 2     | 7.107     | 1048090 | 122271 | 0.000 |      | V M  |      |
| Total |           | 2092670 | 256183 |       |      |      |      |

Supplementary Figure 73. HPLC spectrum of racemic-5au

<Chromatogram>

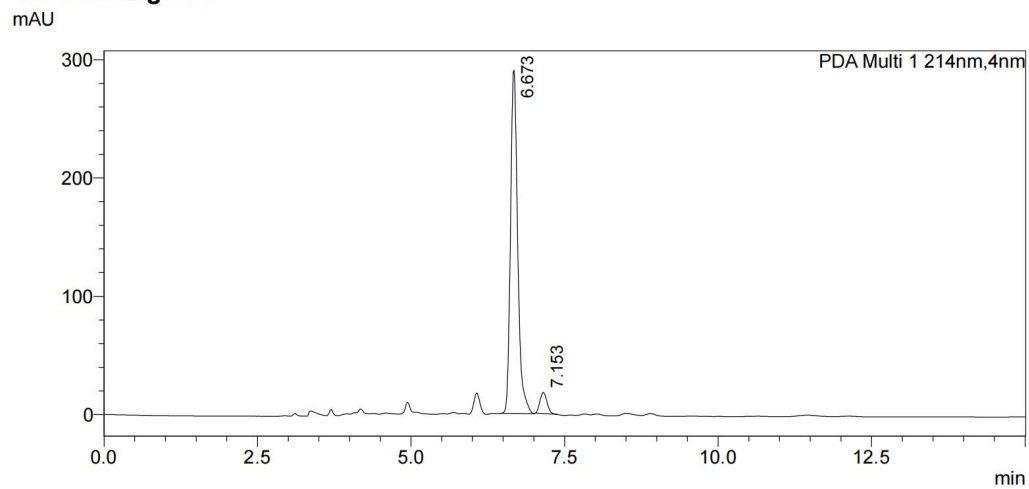

<Peak Table>

PDA Ch1 214nm

| Peak# | Ret. Time | Area    | Height | Conc.  | Unit | Mark | Name |
|-------|-----------|---------|--------|--------|------|------|------|
| 1     | 6.673     | 2362741 | 290245 | 94.341 |      | M    |      |
| 2     | 7.153     | 141736  | 17831  | 5.659  |      | M    |      |
| Total |           | 2504478 | 308075 |        |      |      |      |

Supplementary Figure 74. HPLC spectrum of (S)-5au

**(S)-5-(2,2-dimethyl-1,3-dioxan-4-yl)-2-(trifluoromethyl)pyridine (5av)**

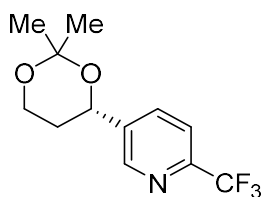

Chemical Formula: C<sub>12</sub>H<sub>14</sub>F<sub>3</sub>NO<sub>2</sub>

Exact Mass: 261.0977

**5av** was prepared according to general procedure **2.2** using NiBr<sub>2</sub>•dme (6.2 mg, 0.02 mmol, 10 mol%), **L6** (11.7 mg, 0.03 mmol, 15 mol%), anhydrous acetone (0.5 mL), 5-bromo-2-(trifluoromethyl)pyridine (45.2 mg, 0.20 mmol, 1 equiv), TBADT (33.5 mg, 0.02 mmol, 5 mol%), 2,2-dimethyl-1,3-dioxane **4a** (232.4 mg, 2.0 mmol, 10 equiv), K<sub>3</sub>PO<sub>4</sub> (63.6 mg, 0.3 mmol, 1.5 equiv) and PhCF<sub>3</sub> (0.5 mL) and was purified by silica gel column chromatography (PE/EtOAc = 8/1) to obtain **5av** as colorless oil (24.5 mg, 47% yield, 91% ee).

<sup>1</sup>H NMR (600 MHz, CDCl<sub>3</sub>) δ 8.69 (d, *J* = 2.1 Hz, 1H), 7.93 (dd, *J* = 8.2, 2.1 Hz, 1H), 7.69 (d, *J* = 8.1 Hz, 1H), 5.08 (dd, *J* = 11.8, 2.9 Hz, 1H), 4.16 (td, *J* = 12.2, 2.8 Hz, 1H), 3.96 (ddd, *J* = 12.0, 5.3, 1.6 Hz, 1H), 1.86 (qd, *J* = 12.4, 5.3 Hz, 1H), 1.75 (dq, *J* = 13.2, 2.4 Hz, 1H), 1.59 (s, 3H), 1.51 (s, 3H);

<sup>13</sup>C NMR (151 MHz, CDCl<sub>3</sub>) δ 147.9, 147.4 (q, *J* = 34.7 Hz), 141.1, 134.9, 121.5 (q, *J* = 273.8 Hz), 120.3 (q, *J* = 2.5 Hz), 99.1, 68.8, 59.7, 33.2, 29.9, 19.1;

<sup>19</sup>F NMR (377 MHz, CDCl<sub>3</sub>) δ -67.71.

HRMS: (APCI) calcd for C<sub>12</sub>H<sub>15</sub>F<sub>3</sub>NO<sub>2</sub><sup>+</sup>[M+H]<sup>+</sup> 262.1049; found 262.1042.

The enantiomeric purity was established by HPLC analysis using a chiral column: OJ-H column, 30 °C, <sup>n</sup>Hexane/<sup>i</sup>Propanol = 99/1 as eluent, 254 nm, 0.5 mL/min. t<sub>R</sub> = 22.9 min (major), 20.5 min (minor).

Optical Rotation: [α]<sub>D</sub><sup>24</sup> -51.0 (c 0.1, <sup>i</sup>PrOH) for 91% ee.

Absolute stereochemistry was determined through analogy with **5ag**.

<Chromatogram>

mAU

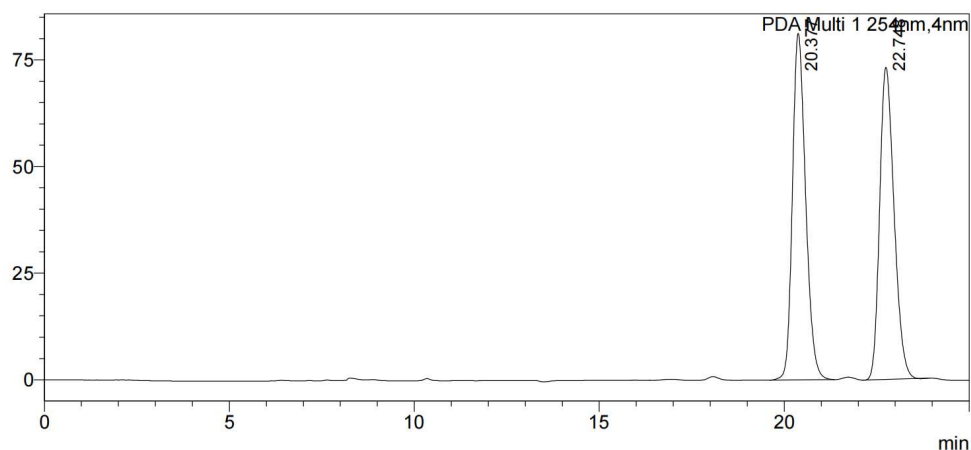

<Peak Table>

PDA Ch1 254nm

| Peak# | Ret. Time | Area    | Height | Conc. | Unit | Mark | Name |
|-------|-----------|---------|--------|-------|------|------|------|
| 1     | 20.377    | 2013020 | 81223  | 0.000 |      | M    |      |
| 2     | 22.748    | 1981980 | 73179  | 0.000 |      | M    |      |
| Total |           | 3994999 | 154403 |       |      |      |      |

Supplementary Figure 75. HPLC spectrum of racemic-5av

<Chromatogram>

mAU

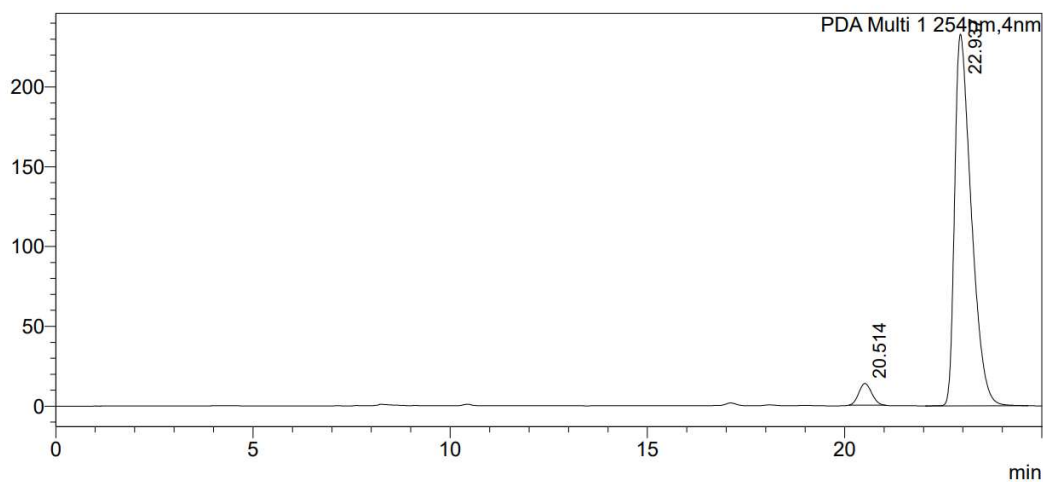

<Peak Table>

PDA Ch1 254nm

| Peak# | Ret. Time | Area    | Height | Conc. | Unit | Mark | Name |
|-------|-----------|---------|--------|-------|------|------|------|
| 1     | 20.514    | 309606  | 13587  | 0.000 |      | M    |      |
| 2     | 22.937    | 6832496 | 232928 | 0.000 |      | M    |      |
| Total |           | 7142102 | 246515 |       |      |      |      |

Supplementary Figure 76. HPLC spectrum of (S)-5av

**methyl (4-((*S*)-2,2-dimethyl-1,3-dioxan-4-yl)benzoyl)-*D*-phenylalaninate (**5ax**)**

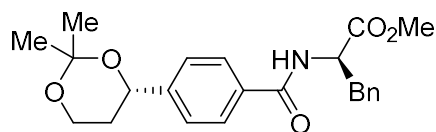

Chemical Formula: C<sub>23</sub>H<sub>27</sub>NO<sub>5</sub>

Exact Mass: 397.1889

**5ax** was prepared according to general procedure **2.2** using NiBr<sub>2</sub>•dme (6.2 mg, 0.02 mmol, 10 mol%), **L6** (11.7 mg, 0.03 mmol, 15 mol%), anhydrous acetone (0.5 mL), methyl (4-bromobenzoyl)-*D*-phenylalaninate (72.2 mg, 0.20 mmol, 1 equiv), TBADT (33.5 mg, 0.02 mmol, 5 mol%), 2,2-dimethyl-1,3-dioxane **4a** (232.4 mg, 2.0 mmol, 10 equiv), K<sub>3</sub>PO<sub>4</sub> (63.6 mg, 0.3 mmol, 1.5 equiv) and PhCF<sub>3</sub> (0.5 mL) and was purified by silica gel column chromatography (PE/EtOAc = 3/1) to obtain **5ax** as colorless oil (57.9 mg, 73% yield, d.r. > 20/1).

<sup>1</sup>H NMR (600 MHz, CDCl<sub>3</sub>) δ 7.71 (d, *J* = 8.1 Hz, 2H), 7.42 (d, *J* = 8.1 Hz, 2H), 7.31 – 7.22 (m, 3H), 7.14 – 7.09 (m, 2H), 6.59 (d, *J* = 7.6 Hz, 1H), 5.11 – 5.05 (m, 1H), 4.97 (dd, *J* = 11.7, 2.8 Hz, 1H), 4.16 – 4.10 (m, 1H), 3.95 – 3.90 (m, 1H), 3.76 (s, 3H), 3.29 (dd, *J* = 13.9, 5.8 Hz, 1H), 3.21 (dd, *J* = 13.9, 5.4 Hz, 1H), 1.89 – 1.80 (m, 1H), 1.71 – 1.65 (m, 1H), 1.57 (s, 3H), 1.50 (s, 3H);

<sup>13</sup>C NMR (151 MHz, CDCl<sub>3</sub>) δ 172.1, 166.6, 146.4, 135.9, 133.1, 129.3, 128.6, 127.2, 126.0, 98.9, 70.9, 60.0, 53.5, 52.4, 37.9, 33.4, 30.0, 19.2;

HRMS: (ESI) calcd for C<sub>23</sub>H<sub>28</sub>NO<sub>5</sub><sup>+</sup>[M+H]<sup>+</sup> 398.1962; found 398.1961.

Optical Rotation: [α]<sub>D</sub><sup>24</sup> 71.8 (c 0.2, <sup>4</sup>PrOH).

Absolute stereochemistry was determined through analogy with **5ag**.

**3*S*,8*S*,9*S*,10*R*,13*R*,14*S*,17*R*)-10,13-dimethyl-17-((*R*)-6-methylheptan-2-yl)-**

**2,3,4,7,8,9,10,11,12,13,14,15,16,17-tetradecahydro-1*H*-cyclopenta[*a*]phenanthren-3-yl 4-((*S*)-2,2-dimethyl-1,3-dioxan-4-yl)benzoate (**5az**)**

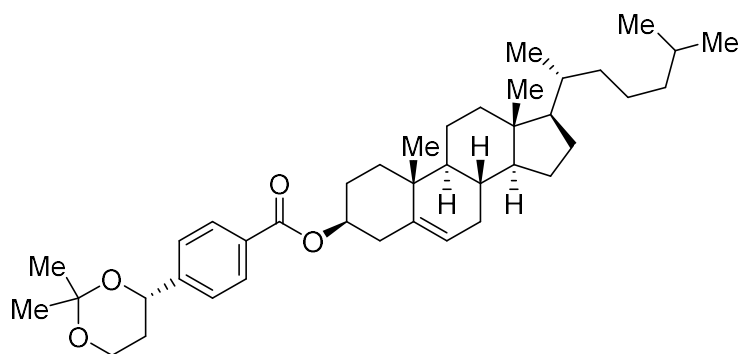

Chemical Formula: C<sub>40</sub>H<sub>60</sub>O<sub>4</sub>  
 Exact Mass: 604.4492

**5az** was prepared according to general procedure **2.2** using NiBr<sub>2</sub>•dme (6.2 mg, 0.02 mmol, 10 mol%), **L6** (11.7 mg, 0.03 mmol, 15 mol%), anhydrous acetone (0.5 mL), (3*S*,8*S*,9*S*,10*R*,13*R*,14*S*,17*R*)-10,13-dimethyl-17-((*R*)-6-methylheptan-2-yl)-2,3,4,7,8,9,10,11,12,13,14,15,16,17-tetradecahydro-1*H*-cyclopenta[*a*]phenanthren-3-yl 4-bromobenzoate (113.9 mg, 0.20 mmol, 1 equiv), TBADT (33.5 mg, 0.02 mmol, 5 mol%), 2,2-dimethyl-1,3-dioxane **4a** (232.4 mg, 2.0 mmol, 10 equiv), K<sub>3</sub>PO<sub>4</sub> (63.6 mg, 0.3 mmol, 1.5 equiv) and PhCF<sub>3</sub> (0.5 mL) and was purified by silica gel column chromatography (PE/EtOAc = 40/1) to obtain **5az** as colorless oil (67.7 mg, 56% yield, d.r. > 20/1).

<sup>1</sup>H NMR (600 MHz, CDCl<sub>3</sub>) δ 8.03 – 8.00 (m, 2H), 7.45 – 7.42 (m, 2H), 5.42 (dd, *J* = 5.0, 2.1 Hz, 1H), 4.99 (dd, *J* = 11.7, 2.8 Hz, 1H), 4.85 (dtd, *J* = 16.3, 8.4, 4.5 Hz, 1H), 4.14 (td, *J* = 12.2, 2.7 Hz, 1H), 3.93 (ddd, *J* = 11.8, 5.3, 1.6 Hz, 1H), 2.47 – 2.44 (m, 2H), 2.04 – 1.96 (m, 3H), 1.91 (dt, *J* = 13.4, 3.6 Hz, 1H), 1.84 (tdd, *J* = 12.8, 10.3, 5.4 Hz, 2H), 1.75 – 1.71 (m, 1H), 1.71 – 1.67 (m, 1H), 1.59 – 1.45 (m, 12H), 1.40 – 1.31 (m, 3H), 1.28 – 1.09 (m, 8H), 1.07 (s, 3H), 1.03 – 0.96 (m, 3H), 0.92 (d, *J* = 6.5 Hz, 3H), 0.87 (d, *J* = 2.8 Hz, 3H), 0.86 (d, *J* = 2.8 Hz, 3H), 0.69 (s, 3H);

<sup>13</sup>C NMR (151 MHz, CDCl<sub>3</sub>) δ 165.8, 147.4, 139.7, 130.0, 129.8, 125.6, 122.8, 98.9, 74.6, 71.0, 60.0, 56.7, 56.2, 50.1, 42.3, 39.8, 39.5, 38.2, 37.0, 36.7, 36.2, 35.8, 33.5, 32.0, 31.9, 30.0, 28.3, 28.0, 27.9, 24.3, 23.8, 22.9, 22.6, 21.1, 19.4, 19.2, 18.7, 11.9;

HRMS: (APCI) calcd for C<sub>40</sub>H<sub>61</sub>O<sub>4</sub><sup>+</sup>[M+H]<sup>+</sup> 605.4564; found 605.4558.

Optical Rotation: [α]<sub>D</sub><sup>22</sup> -6.2 (c 0.1, <sup>t</sup>PrOH).

Absolute stereochemistry was determined through analogy with **5ag**.

**(1*R*,2*S*,5*R*)-2-isopropyl-5-methylcyclohexyl 4-((*S*)-2,2-dimethyl-1,3-dioxan-4-yl)benzoate**

**(5aaa)**

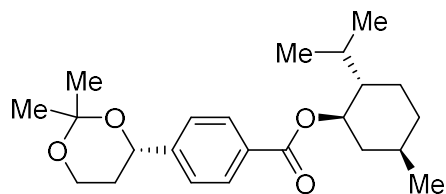

Chemical Formula: C<sub>23</sub>H<sub>34</sub>O<sub>4</sub>  
Exact Mass: 374.2457

**5aaa** was prepared according to general procedure **2.2** using NiBr<sub>2</sub>•dme (6.2 mg, 0.02 mmol, 10 mol%), **L6** (11.7 mg, 0.03 mmol, 15 mol%), anhydrous acetone (0.5 mL), (1*R*,2*S*,5*R*)-2-isopropyl-5-methylcyclohexyl 4-bromobenzoate (67.6 mg, 0.20 mmol, 1 equiv), TBADT (33.5 mg, 0.02 mmol, 5 mol%), 2,2-dimethyl-1,3-dioxane **4a** (232.4 mg, 2.0 mmol, 10 equiv), K<sub>3</sub>PO<sub>4</sub> (63.6 mg, 0.3 mmol, 1.5 equiv) and PhCF<sub>3</sub> (0.5 mL) and was purified by silica gel column chromatography (PE/EtOAc = 3/1) to obtain **5aaa** as colorless oil (46.4 mg, 62% yield, d.r. > 20/1).

<sup>1</sup>H NMR (600 MHz, CDCl<sub>3</sub>) δ 8.05 – 8.00 (m, 2H), 7.46 – 7.42 (m, 2H), 4.98 (dd, *J* = 11.7, 2.8 Hz, 1H), 4.94 – 4.89 (m, 1H), 4.16 – 4.10 (m, 1H), 3.95 – 3.90 (m, 1H), 2.15 – 2.08 (m, 1H), 1.97 – 1.90 (m, 1H), 1.89 – 1.80 (m, 1H), 1.75 – 1.66 (m, 3H), 1.60 – 1.52 (m, 5H), 1.50 (s, 3H), 1.16 – 1.05 (m, 2H), 0.91 (dd, *J* = 9.9, 6.8 Hz, 7H), 0.78 (d, *J* = 6.9 Hz, 3H);

<sup>13</sup>C NMR (151 MHz, CDCl<sub>3</sub>) δ 165.9, 147.3, 130.1, 129.8, 125.7, 98.9, 74.8, 70.9, 60.0, 47.3, 41.0, 34.3, 33.4, 31.5, 30.0, 26.6, 23.7, 22.1, 20.8, 19.2, 16.6;

HRMS: (APCI) calcd for C<sub>23</sub>H<sub>35</sub>O<sub>4</sub><sup>+</sup>[M+H]<sup>+</sup> 375.2529; found 375.2522.

Optical Rotation: [α]<sub>D</sub><sup>24</sup> 71.8 (c 0.2, <sup>i</sup>PrOH).

Absolute stereochemistry was determined through analogy with **5ag**.

**(8*R*,9*S*,13*S*,14*S*)-13-methyl-17-oxo-7,8,9,11,12,13,14,15,16,17-decahydro-6*H*-cyclopenta[*a*]phenanthren-3-yl 4-((*S*)-2,2-dimethyl-1,3-dioxan-4-yl)benzoate (**5aab**)**

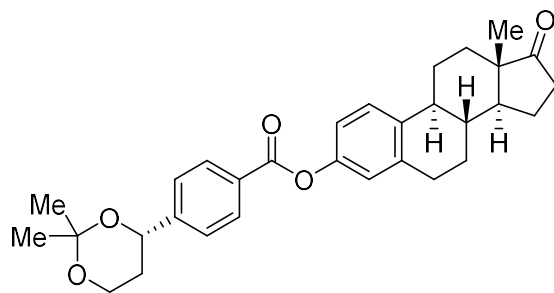

Chemical Formula: C<sub>31</sub>H<sub>36</sub>O<sub>5</sub>

Exact Mass: 488.2563

**5aab** was prepared according to general procedure **2.2** using NiBr<sub>2</sub>•dme (6.2 mg, 0.02 mmol, 10 mol%), **L6** (11.7 mg, 0.03 mmol, 15 mol%), anhydrous acetone (0.5 mL), (8*R*,9*S*,13*S*,14*S*)-13-methyl-17-oxo-7,8,9,11,12,13,14,15,16,17-decahydro-6H-cyclopenta[*a*]phenanthren-3-yl 4-bromobenzoate (90.7 mg, 0.20 mmol, 1 equiv), TBADT (33.5 mg, 0.02 mmol, 5 mol%), 2,2-dimethyl-1,3-dioxane **4a** (232.4 mg, 2.0 mmol, 10 equiv), K<sub>3</sub>PO<sub>4</sub> (63.6 mg, 0.3 mmol, 1.5 equiv) and PhCF<sub>3</sub> (0.5 mL) and was purified by silica gel column chromatography (PE/EtOAc = 4/1) to obtain **5aab** as yellow solid (45.9 mg, 47% yield, d.r. > 20/1).

<sup>1</sup>H NMR (600 MHz, CDCl<sub>3</sub>) δ 8.17 (d, *J* = 8.0 Hz, 2H), 7.51 (d, *J* = 8.0 Hz, 2H), 7.33 (d, *J* = 8.5 Hz, 1H), 6.98 (dd, *J* = 8.5, 2.6 Hz, 1H), 6.94 (d, *J* = 2.5 Hz, 1H), 5.03 (dd, *J* = 11.8, 2.8 Hz, 1H), 4.16 (td, *J* = 12.1, 2.6 Hz, 1H), 3.97 – 3.93 (m, 1H), 2.97 – 2.92 (m, 2H), 2.52 (dd, *J* = 19.1, 8.8 Hz, 1H), 2.46 – 2.41 (m, 1H), 2.32 (td, *J* = 11.0, 4.2 Hz, 1H), 2.16 (dt, *J* = 18.6, 8.8 Hz, 2H), 2.10 – 2.00 (m, 3H), 1.98 (dt, *J* = 12.9, 3.1 Hz, 1H), 1.87 (qd, *J* = 12.5, 5.2 Hz, 1H), 1.75 – 1.71 (m, 1H), 1.62 – 1.51 (m, 10H), 0.93 (s, 3H);

<sup>13</sup>C NMR (151 MHz, CDCl<sub>3</sub>) δ 220.8, 165.3, 148.8, 148.3, 138.1, 137.4, 130.4, 128.8, 126.5, 125.9, 121.7, 118.9, 99.0, 70.9, 60.0, 50.5, 48.0, 44.2, 38.0, 35.9, 33.5, 31.6, 30.0, 29.4, 26.4, 25.8, 21.6, 19.2, 13.9;

HRMS: (APCI) calcd for C<sub>31</sub>H<sub>37</sub>O<sub>5</sub><sup>+</sup>[M+H]<sup>+</sup> 489.2636; found 489.2631.

Optical Rotation: [α]<sub>D</sub><sup>22</sup> 86.9 (c 0.1, <sup>t</sup>PrOH).

Absolute stereochemistry was determined through analogy with **5ag**.

**(S)-3-(2,2-dimethyl-1,3-dioxan-4-yl)cyclohex-2-en-1-one (5aac)**

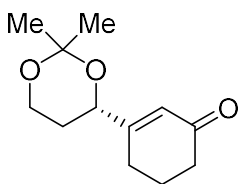

Chemical Formula: C<sub>12</sub>H<sub>18</sub>O<sub>3</sub>

Exact Mass: 210.1256

**5aac** was prepared according to general procedure **2.2** using NiBr<sub>2</sub>•dme (6.2 mg, 0.02 mmol, 10 mol%), **L6** (11.7 mg, 0.03 mmol, 15 mol%), anhydrous acetone (0.5 mL), 3-bromocyclohex-2-en-1-one (35.0 mg, 0.20 mmol, 1 equiv), TBADT (33.5 mg, 0.02 mmol, 5 mol%), 2,2-dimethyl-1,3-dioxane **4a** (232.4 mg, 2.0 mmol, 10 equiv), K<sub>3</sub>PO<sub>4</sub> (63.6 mg, 0.3 mmol, 1.5 equiv) and PhCF<sub>3</sub> (0.5 mL) and was purified by silica gel column chromatography (PE/EtOAc = 5/1) to obtain **5aac** as colorless oil (21.4 mg, 51% yield, 97% ee).

<sup>1</sup>H NMR (600 MHz, CDCl<sub>3</sub>) δ 6.11 (s, 1H), 4.45 (dt, *J* = 12.0, 2.0 Hz, 1H), 4.04 (td, *J* = 12.1, 2.8 Hz, 1H), 3.90 (ddd, *J* = 11.9, 5.4, 1.7 Hz, 1H), 2.40 (t, *J* = 6.7 Hz, 2H), 2.35 (dtd, *J* = 12.5, 6.2, 1.6 Hz, 1H), 2.32 – 2.26 (m, 1H), 2.01 (q, *J* = 6.4 Hz, 2H), 1.72 (dd, *J* = 12.3, 5.3 Hz, 1H), 1.60 (dq, *J* = 13.1, 2.4 Hz, 1H), 1.49 (s, 3H), 1.43 (s, 3H);

<sup>13</sup>C NMR (151 MHz, CDCl<sub>3</sub>) δ 199.9, 163.9, 124.1, 98.7, 71.0, 59.7, 37.8, 29.8, 29.7, 25.6, 22.6, 19.1;

HRMS: (APCI) calcd for C<sub>12</sub>H<sub>19</sub>O<sub>2</sub><sup>+</sup>[M+H]<sup>+</sup> 211.1329; found 211.1328.

The enantiomeric purity was established by HPLC analysis using a chiral column: OJ-H column, 30 °C, <sup>n</sup>Hexane/<sup>i</sup>Propanol = 95/5 as eluent, 254 nm, 1 mL/min. tR = 12.8 min (major), 12.0 min (minor).

Optical Rotation: [α]<sub>D</sub><sup>22</sup> -13.6 (c 0.1, <sup>i</sup>PrOH) for 97% ee.

Absolute stereochemistry was determined through analogy with **5ag**.



<Chromatogram>

mAU

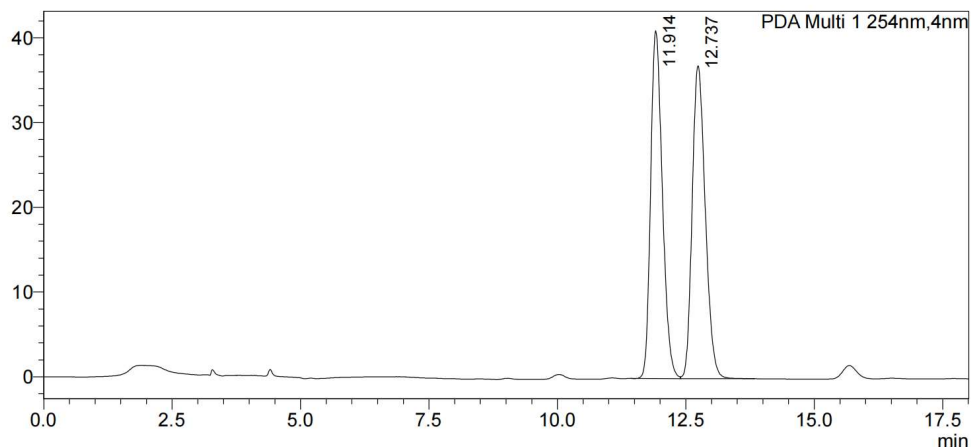

<Peak Table>

PDA Ch1 254nm

| Peak# | Ret. Time | Area    | Height | Conc. | Unit | Mark | Name |
|-------|-----------|---------|--------|-------|------|------|------|
| 1     | 11.914    | 651921  | 41030  | 0.000 |      | M    |      |
| 2     | 12.737    | 654193  | 36914  | 0.000 |      | V M  |      |
| Total |           | 1306114 | 77944  |       |      |      |      |

Supplementary Figure 77. HPLC spectrum of racemic-5aac

<Chromatogram>

mAU

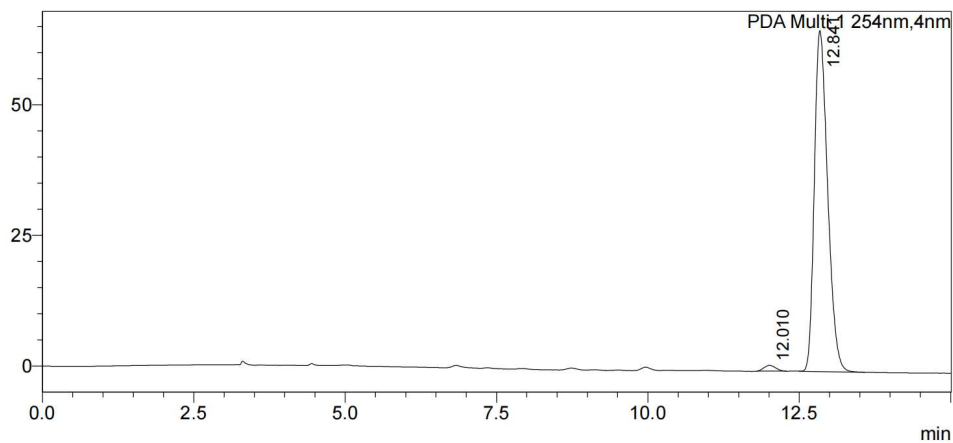

<Peak Table>

PDA Ch1 254nm

| Peak# | Ret. Time | Area    | Height | Conc. | Unit | Mark | Name |
|-------|-----------|---------|--------|-------|------|------|------|
| 1     | 12.010    | 14478   | 1092   | 0.000 |      | M    |      |
| 2     | 12.841    | 996508  | 65276  | 0.000 |      | M    |      |
| Total |           | 1010986 | 66367  |       |      |      |      |

Supplementary Figure 78. HPLC spectrum of (S)-5aac

**(R)-3-((S)-2,2-dimethyl-1,3-dioxan-4-yl)cyclohexan-1-one (5aad)**

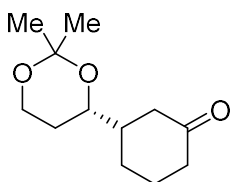

Chemical Formula: C<sub>12</sub>H<sub>20</sub>O<sub>3</sub>

Exact Mass: 212.1412

An oven-dried 10-mL Schlenk equipped with a PTFE-coated stir bar was charged with 5% Pd/C (36.6 mg, 0.018 mmol, 15 mol%) and **5aac** (21.0 mg, 0.10 mmol, 1 equiv) in toluene (1 mL) and CH<sub>2</sub>Cl<sub>2</sub> (1 mL). The reaction mixture was stirred under H<sub>2</sub> atmosphere (10 bar) at 25 °C for 24 hours. The mixture was filtered through Celite and the filtrate was condensed. The residue was purified by silica gel column chromatography (PE/EtOAc = 5/1) to obtain **5aad** as colorless oil (16.1 mg, 76%, d.r. > 20/1).

<sup>1</sup>H NMR (600 MHz, CDCl<sub>3</sub>) δ 3.94 (t, *J* = 12.0 Hz, 1H), 3.85 (dd, *J* = 11.6, 5.2 Hz, 1H), 3.74 – 3.65 (m, 1H), 2.36 (t, *J* = 11.1 Hz, 2H), 2.27 (td, *J* = 14.0, 13.3, 5.9 Hz, 1H), 2.16 (t, *J* = 13.0 Hz, 1H), 2.05 (t, *J* = 14.1 Hz, 2H), 1.84 (dt, *J* = 16.3, 8.3 Hz, 1H), 1.63 (tt, *J* = 12.2, 6.0 Hz, 3H), 1.54 – 1.45 (m, 1H), 1.42 (s, 3H), 1.37 (s, 3H);

<sup>13</sup>C NMR (151 MHz, CDCl<sub>3</sub>) δ 211.7, 98.4, 71.6, 59.8, 43.7, 43.1, 41.5, 29.8, 28.2, 26.1, 24.8, 19.1;

HRMS: (ESI) calcd for C<sub>12</sub>H<sub>21</sub>O<sub>3</sub><sup>+</sup>[M+H]<sup>+</sup> 213.1485; found 213.1480.

Optical Rotation: [α]<sub>D</sub><sup>21</sup> -0.4 (c 0.1, <sup>t</sup>PrOH).

**(S)-1-(4-(2,2-dimethyl-1,3-dioxepan-4-yl)phenyl)ethan-1-one (7aa)**

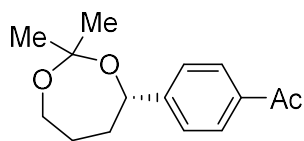

Chemical Formula: C<sub>15</sub>H<sub>20</sub>O<sub>3</sub>

Exact Mass: 248.1412

**7aa** was prepared according to general procedure **2.1** using NiBr<sub>2</sub>•dme (6.2 mg, 0.02 mmol, 10 mol%), **L6** (11.7 mg, 0.03 mmol, 15 mol%), anhydrous acetone (0.5 mL), 1-(4-bromophenyl)ethan-1-one (39.8 mg, 0.20 mmol, 1 equiv), TBADT (33.5 mg, 0.02 mmol, 5 mol%), 2,2-dimethyl-1,3-dioxepane **6a** (130.2 mg, 1.0 mmol, 5 equiv), K<sub>3</sub>PO<sub>4</sub> (63.6 mg, 0.3 mmol, 1.5 equiv) and PhCF<sub>3</sub> (0.5 mL) and was purified by silica gel column chromatography (PE/EtOAc = 8/1) to obtain **7aa** as colorless oil (2 mg, 4% yield, 33% ee).

<sup>1</sup>H NMR (600 MHz, CDCl<sub>3</sub>) δ 7.94 – 7.91 (m, 2H), 7.46 – 7.43 (m, 2H), 4.87 (d, *J* = 10.7 Hz, 1H), 3.91 – 3.87 (m, 1H), 3.75 – 3.71 (m, 1H), 2.60 (s, 3H), 1.97 – 1.92 (m, 1H), 1.75 (dt, *J* = 5.3, 3.0 Hz, 1H), 1.65 (dddd, *J* = 13.8, 12.4, 10.7, 5.4 Hz, 2H), 1.43 (s, 3H), 1.38 (s, 3H);

<sup>13</sup>C NMR (151 MHz, CDCl<sub>3</sub>) δ 197.8, 150.1, 136.3, 128.6, 125.9, 73.8, 62.9, 36.4, 31.0, 29.7, 28.9, 26.7;

HRMS: (APCI) calcd for C<sub>15</sub>H<sub>21</sub>O<sub>3</sub><sup>+</sup>[M+H]<sup>+</sup> 249.1485; found 249.1484.

The enantiomeric purity was established by HPLC analysis using a chiral column: AD-H column, 30 °C, <sup>n</sup>Hexane/<sup>i</sup>Propanol = 90/10 as eluent, 254 nm, 1 mL/min. tR = 5.0 min (minor), 6.9 min (major).

<Chromatogram>

mAU

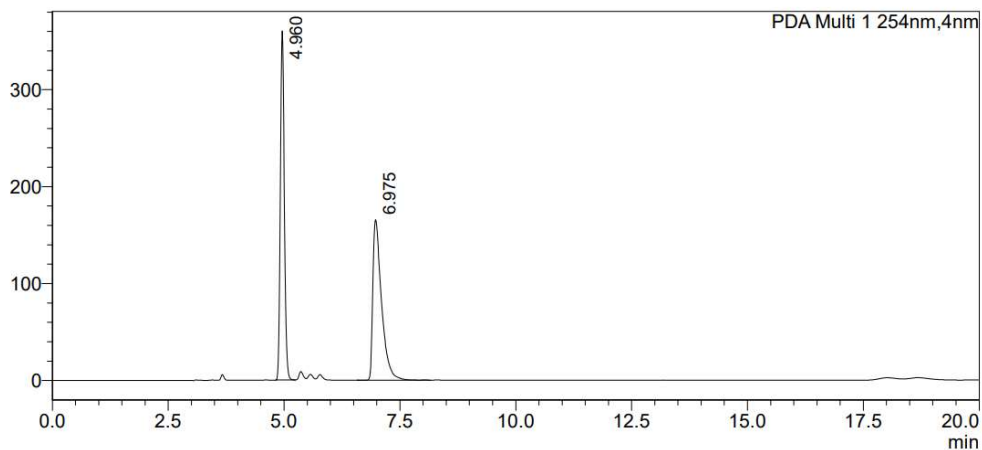

<Peak Table>

PDA Ch1 254nm

| Peak# | Ret. Time | Area    | Height | Conc. | Unit | Mark | Name |
|-------|-----------|---------|--------|-------|------|------|------|
| 1     | 4.960     | 2139871 | 359951 | 0.000 |      | M    |      |
| 2     | 6.975     | 2162050 | 165615 | 0.000 |      | M    |      |
| Total |           | 4301921 | 525566 |       |      |      |      |

Supplementary Figure 79. HPLC spectrum of racemic-7aa

<Chromatogram>

mAU

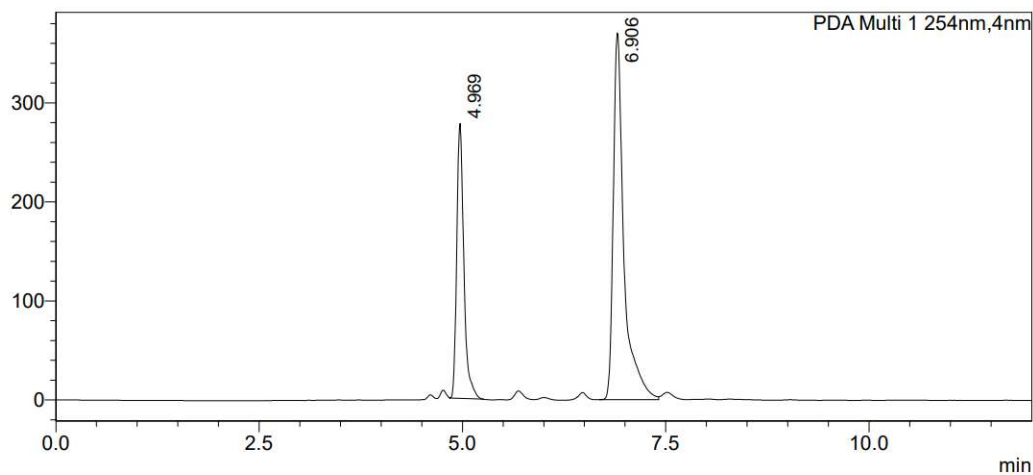

<Peak Table>

PDA Ch1 254nm

| Peak# | Ret. Time | Area    | Height | Conc.  | Unit | Mark | Name |
|-------|-----------|---------|--------|--------|------|------|------|
| 1     | 4.969     | 1684293 | 277503 | 33.314 |      | M    |      |
| 2     | 6.906     | 3371496 | 370302 | 66.686 |      | M    |      |
| Total |           | 5055789 | 647805 |        |      |      |      |

Supplementary Figure 80. HPLC spectrum of (S)-7aa

**(S)-1-(4-(2,2-dimethyl-1,3-dioxepan-5-yl)phenyl)ethan-1-one (7aa')**

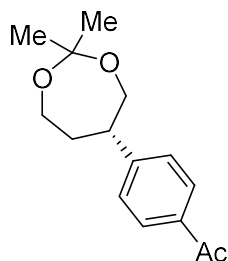

Chemical Formula: C<sub>15</sub>H<sub>20</sub>O<sub>3</sub>

Exact Mass: 248.1412

**7aa'** was prepared according to general procedure **2.1** using NiBr<sub>2</sub>•dme (6.2 mg, 0.02 mmol, 10 mol%), **L6** (11.7 mg, 0.03 mmol, 15 mol%), anhydrous acetone (0.5 mL), 1-(4-bromophenyl)ethan-1-one (39.8 mg, 0.20 mmol, 1 equiv), TBADT (33.5 mg, 0.02 mmol, 5 mol%), 2,2-dimethyl-1,3-dioxepane **6a** (130.2 mg, 1.0 mmol, 5 equiv), K<sub>3</sub>PO<sub>4</sub> (63.6 mg, 0.3 mmol, 1.5 equiv) and PhCF<sub>3</sub> (0.5 mL) and was purified by silica gel column chromatography (PE/EtOAc = 8/1) to obtain **7aa'** as colorless oil (3.2 mg, 6% yield, 18% ee).

<sup>1</sup>H NMR (400 MHz, CDCl<sub>3</sub>) δ 7.93 – 7.87 (m, 2H), 7.33 – 7.28 (m, 2H), 3.96 – 3.85 (m, 2H), 3.74 (dt, *J* = 12.3, 3.4 Hz, 1H), 3.61 (ddd, *J* = 11.9, 3.2, 1.4 Hz, 1H), 2.95 (tdd, *J* = 10.4, 6.0, 3.2 Hz, 1H), 2.58 (s, 3H), 1.92 – 1.85 (m, 2H), 1.39 (s, 6H).

<sup>13</sup>C NMR (151 MHz, CDCl<sub>3</sub>) δ 197.7, 148.0, 135.7, 128.7, 127.7, 101.5, 66.6, 60.9, 47.0, 37.1, 26.6, 25.0, 24.9.

The enantiomeric purity was established by HPLC analysis using a chiral column: AD-H column, 30 °C, "Hexane"/Propanol = 95/5 as eluent, 250 nm, 0.5 mL/min. tR = 14.3 min (minor), 13.7 min (major).

<Chromatogram>

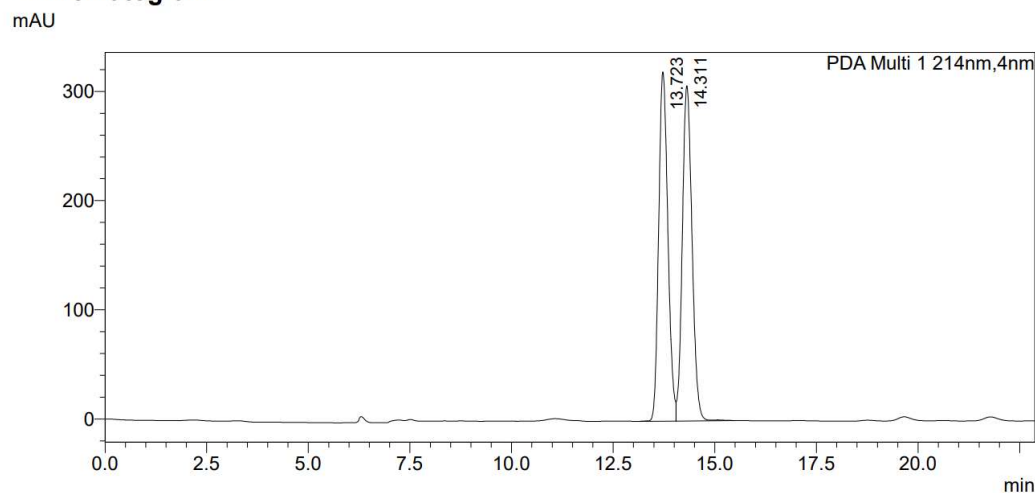

<Peak Table>

PDA Ch1 214nm

| Peak# | Ret. Time | Area     | Height | Conc. | Unit | Mark | Name |
|-------|-----------|----------|--------|-------|------|------|------|
| 1     | 13.723    | 5042775  | 319587 | 0.000 |      | M    |      |
| 2     | 14.311    | 5089008  | 306805 | 0.000 |      | V M  |      |
| Total |           | 10131783 | 626392 |       |      |      |      |

Supplementary Figure 81. HPLC spectrum of racemic-7aa'

<Chromatogram>

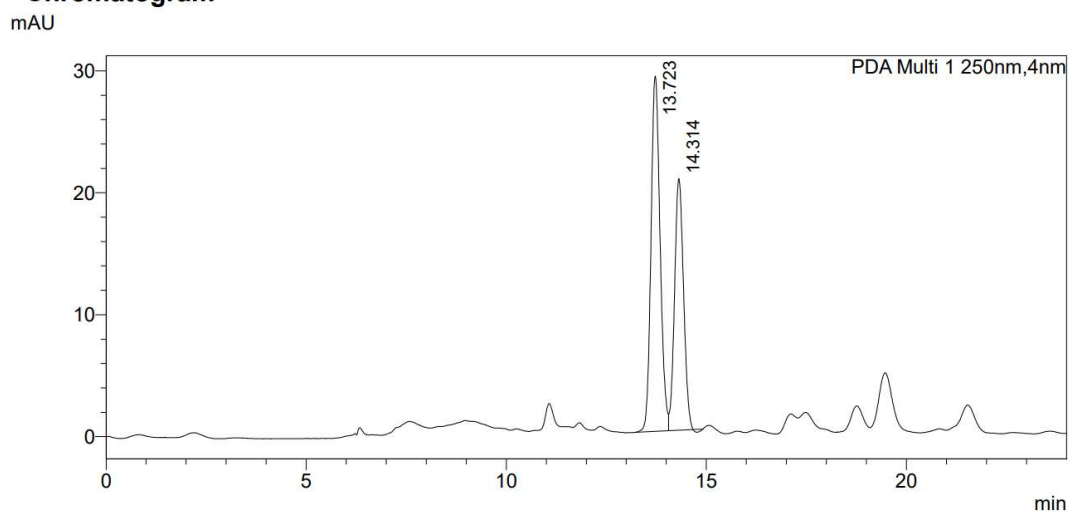

<Peak Table>

PDA Ch1 250nm

| Peak# | Ret. Time | Area   | Height | Conc. | Unit | Mark | Name |
|-------|-----------|--------|--------|-------|------|------|------|
| 1     | 13.723    | 460559 | 29136  | 0.000 |      | M    |      |
| 2     | 14.314    | 320015 | 20642  | 0.000 |      | V M  |      |
| Total |           | 780574 | 49778  |       |      |      |      |

Supplementary Figure 82. HPLC spectrum of (S)-7aa'

**1-(4-((4*R*,5*R*)-2,2-dimethyl-5-(4-(methylsulfonyl)phenyl)-1,3-dioxolan-4-yl)phenyl)ethan-1-one (9a)**

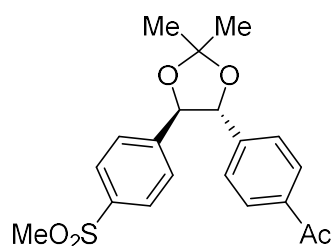

Chemical Formula: C<sub>20</sub>H<sub>22</sub>O<sub>5</sub>S  
Exact Mass: 374.1188

**9a** was prepared according to general procedure **2.3** using NiBr<sub>2</sub>•dme (6.4 mg, 0.02 mmol, 10 mol%), dtbbpy (8.0 mg, 0.03 mmol, 15 mol%), TBADT (13.3 mg, 0.004 mmol, 2 mol%), K<sub>3</sub>PO<sub>4</sub> (50.9 mg, 0.24 mmol, 1.2 equiv), 1-bromo-4-(methylsulfonyl)benzene (47.0 mg, 0.20 mmol, 1.0 equiv), **3ca** (66.0 mg, 0.6 mmol, 3.0 equiv) and anhydrous MeCN (1 mL) and was purified by silica gel column chromatography (PE/EA = 2/1) to obtain **9a** as colorless oil (62.1 mg, 83% yield, d.r. > 20/1). R<sub>f</sub> = 0.3 (PE/EA = 3/1).

<sup>1</sup>H NMR (600 MHz, CDCl<sub>3</sub>) δ 7.95 – 7.91 (m, 2H), 7.91 – 7.87 (m, 2H), 7.40 – 7.36 (m, 2H), 7.32 – 7.27 (m, 2H), 4.78 (d, *J* = 8.4 Hz, 1H), 4.72 (d, *J* = 8.4 Hz, 1H), 3.05 (s, 3H), 2.59 (s, 3H), 1.69 (s, 3H), 1.68 (s, 3H);

<sup>13</sup>C NMR (151 MHz, CDCl<sub>3</sub>) δ 197.6, 142.9, 141.2, 140.6, 137.4, 128.7, 127.7, 127.5, 126.9, 110.5, 84.9, 84.6, 44.5, 27.1, 27.0, 26.7;

HRMS: (APCI) calcd for C<sub>20</sub>H<sub>23</sub>O<sub>5</sub>S<sup>+</sup>[M+H]<sup>+</sup> 375.1261; found 375.1252.

**1-(4-((4*S*,5*R*)-5-(chloromethyl)-2,2-dimethyl-1,3-dioxolan-4-yl)phenyl)ethan-1-one (9b)**

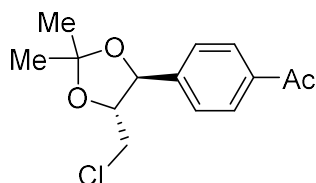

Chemical Formula: C<sub>14</sub>H<sub>17</sub>ClO<sub>3</sub>  
Exact Mass: 268.0866

**9b** was prepared according to general procedure **2.3** using NiBr<sub>2</sub>•dme (6.4 mg, 0.02 mmol, 10 mol%), dtbbpy (8.0 mg, 0.03 mmol, 15 mol%), TBADT (13.3 mg, 0.004 mmol, 2 mol%), K<sub>3</sub>PO<sub>4</sub> (50.9 mg, 0.24 mmol, 1.2 equiv), 1-(4-bromophenyl)ethan-1-one (40.0 mg, 0.20 mmol,

1.0 equiv), (*R*)-4-(chloromethyl)-2,2-dimethyl-1,3-dioxolane (150 mg, 1.0 mmol, 5.0 equiv) and anhydrous MeCN (1 mL) and was purified by silica gel column chromatography (PE/EA = 10/1) to obtain **9b** as colorless oil (47.2 mg, 88% yield, d.r. > 20/1).  $R_f = 0.4$  (PE/EA = 10/1).  $^1\text{H NMR}$  (600 MHz,  $\text{CDCl}_3$ )  $\delta$  7.98 – 7.94 (m, 2H), 7.52 – 7.47 (m, 2H), 4.97 (d,  $J = 8.1$  Hz, 1H), 4.01 (dt,  $J = 8.3, 4.3$  Hz, 1H), 3.75 (dd,  $J = 12.1, 4.1$  Hz, 1H), 3.62 (dd,  $J = 12.1, 4.5$  Hz, 1H), 2.60 (s, 3H), 1.58 (s, 3H), 1.55 (s, 3H);  $^{13}\text{C NMR}$  (151 MHz,  $\text{CDCl}_3$ )  $\delta$  197.5, 142.6, 137.2, 128.7, 126.6, 110.2, 82.1, 79.9, 42.8, 27.1, 26.9, 26.6; HRMS: (ESI) calcd for  $\text{C}_{14}\text{H}_{18}\text{ClO}_3^+[\text{M}+\text{H}]^+$  269.0939; found 269.0939.

#### 4-((4*S*,5*R*)-5-(chloromethyl)-2,2-dimethyl-1,3-dioxolan-4-yl)benzonitrile (**9c**)

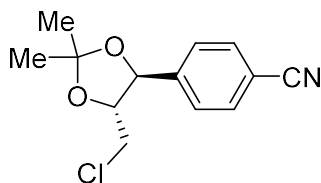

Chemical Formula:  $\text{C}_{13}\text{H}_{14}\text{ClNO}_2$   
Exact Mass: 251.0713

**9c** was prepared according to general procedure **2.3** using  $\text{NiBr}_2 \cdot \text{dme}$  (6.4 mg, 0.02 mmol, 10 mol%), dtbbpy (8.0 mg, 0.03 mmol, 15 mol%), TBADT (13.3 mg, 0.004 mmol, 2 mol%),  $\text{K}_3\text{PO}_4$  (50.9 mg, 0.24 mmol, 1.2 equiv), 4-bromobenzonitrile (36.4 mg, 0.20 mmol, 1.0 equiv), (*R*)-4-(chloromethyl)-2,2-dimethyl-1,3-dioxolane (150 mg, 1.0 mmol, 5.0 equiv) and anhydrous MeCN (1 mL) and was purified by silica gel column chromatography (PE/EA = 10/1) to obtain **9c** as colorless oil (41.7 mg, 83% yield, d.r. > 20/1).  $R_f = 0.5$  (PE/EA = 10/1).  $^1\text{H NMR}$  (600 MHz,  $\text{CDCl}_3$ )  $\delta$  7.70 – 7.65 (m, 2H), 7.54 – 7.51 (m, 2H), 4.97 (d,  $J = 7.9$  Hz, 1H), 3.99 (dt,  $J = 7.9, 4.3$  Hz, 1H), 3.75 (dd,  $J = 12.1, 4.4$  Hz, 1H), 3.63 (dd,  $J = 12.1, 4.3$  Hz, 1H), 1.57 (s, 3H), 1.54 (s, 3H);  $^{13}\text{C NMR}$  (151 MHz,  $\text{CDCl}_3$ )  $\delta$  142.9, 132.5, 127.2, 118.4, 112.3, 110.5, 82.0, 79.7, 42.6, 27.0, 26.9; HRMS: (ESI) calcd for  $\text{C}_{13}\text{H}_{15}\text{ClNO}_2^+[\text{M}+\text{H}]^+$  252.0785; found 252.0783.

#### ethyl 4-((4*S*,5*R*)-5-(chloromethyl)-2,2-dimethyl-1,3-dioxolan-4-yl)benzoate (**9d**)



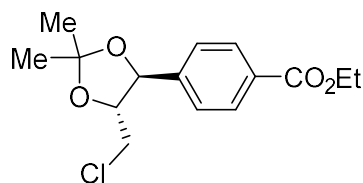

Chemical Formula: C<sub>15</sub>H<sub>19</sub>ClO<sub>4</sub>

Exact Mass: 298.0972

**9d** was prepared according to general procedure **2.3** using NiBr<sub>2</sub>•dme (6.4 mg, 0.02 mmol, 10 mol%), dtbbpy (8.0 mg, 0.03 mmol, 15 mol%), TBADT (13.3 mg, 0.004 mmol, 2 mol%), K<sub>3</sub>PO<sub>4</sub> (50.9 mg, 0.24 mmol, 1.2 equiv), ethyl 4-bromobenzoate (46.0 mg, 0.20 mmol, 1.0 equiv), (*R*)-4-(chloromethyl)-2,2-dimethyl-1,3-dioxolane (150 mg, 1.0 mmol, 5.0 equiv) and anhydrous MeCN (1 mL) and was purified by silica gel column chromatography (PE/EA = 10/1) to obtain **9d** as colorless oil (47.7 mg, 80% yield, d.r. > 20/1). R<sub>f</sub> = 0.5 (PE/EA = 10/1).

<sup>1</sup>H NMR (600 MHz, CDCl<sub>3</sub>) δ 8.09 – 8.02 (m, 2H), 7.50 – 7.44 (m, 2H), 4.97 (d, *J* = 8.1 Hz, 1H), 4.38 (q, *J* = 7.1 Hz, 2H), 4.01 (dt, *J* = 8.2, 4.2 Hz, 1H), 3.75 (dd, *J* = 12.1, 4.0 Hz, 1H), 3.62 (dd, *J* = 12.1, 4.5 Hz, 1H), 1.59 (s, 3H), 1.55 (s, 3H), 1.39 (t, *J* = 7.1 Hz, 3H);

<sup>13</sup>C NMR (151 MHz, CDCl<sub>3</sub>) δ 166.2, 142.3, 130.7, 129.9, 126.4, 110.2, 82.2, 80.0, 61.1, 42.8, 27.1, 26.9, 14.3;

HRMS: (ESI) calcd for C<sub>15</sub>H<sub>20</sub>ClO<sub>4</sub><sup>+</sup>[M+H]<sup>+</sup> 299.1044; found 299.1041.

**(4*R*,5*S*)-4-(chloromethyl)-2,2-dimethyl-5-(4-(methylsulfonyl)phenyl)-1,3-dioxolane (9e)**

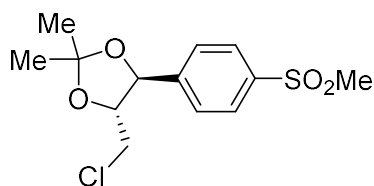

Chemical Formula: C<sub>13</sub>H<sub>17</sub>ClO<sub>4</sub>S

Exact Mass: 304.0536

**9e** was prepared according to general procedure **2.3** using NiBr<sub>2</sub>•dme (6.4 mg, 0.02 mmol, 10 mol%), dtbbpy (8.0 mg, 0.03 mmol, 15 mol%), TBADT (13.3 mg, 0.004 mmol, 2 mol%), K<sub>3</sub>PO<sub>4</sub> (50.9 mg, 0.24 mmol, 1.2 equiv), 1-bromo-4-(methylsulfonyl)benzene (47.0 mg, 0.20 mmol, 1.0 equiv), (*R*)-4-(chloromethyl)-2,2-dimethyl-1,3-dioxolane (150 mg, 1.0 mmol, 5.0 equiv) and anhydrous MeCN (1 mL) and was purified by silica gel column chromatography (PE/EA = 5/1) to obtain **9e** as colorless oil (48.6 mg, 80% yield, d.r. > 20/1). R<sub>f</sub> = 0.3 (PE/EA

= 5/1).

$^1\text{H}$  NMR (600 MHz,  $\text{CDCl}_3$ )  $\delta$  7.98 – 7.93 (m, 2H), 7.63 – 7.58 (m, 2H), 5.00 (d,  $J$  = 7.9 Hz, 1H), 4.01 (dt,  $J$  = 8.0, 4.3 Hz, 1H), 3.76 (dd,  $J$  = 12.1, 4.4 Hz, 1H), 3.64 (dd,  $J$  = 12.1, 4.3 Hz, 1H), 3.05 (s, 3H), 1.57 (s, 3H), 1.54 (s, 3H);

$^{13}\text{C}$  NMR (151 MHz,  $\text{CDCl}_3$ )  $\delta$  143.9, 140.6, 127.8, 127.4, 110.5, 82.1, 79.6, 44.4, 42.7, 27.0, 26.9;

HRMS: (ESI) calcd for  $\text{C}_{13}\text{H}_{18}\text{ClO}_4\text{S}^+[\text{M}+\text{H}]^+$  305.0608; found 305.0604.

**(4*R*,5*S*)-4-(chloromethyl)-5-(4-methoxyphenyl)-2,2-dimethyl-1,3-dioxolane (9f)**

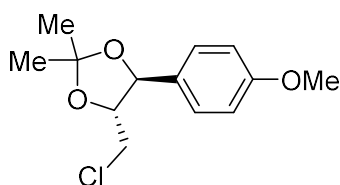

Chemical Formula:  $\text{C}_{13}\text{H}_{17}\text{ClO}_3$

Exact Mass: 256.0866

**9f** was prepared according to general procedure **2.3** using  $\text{NiBr}_2\cdot\text{dme}$  (6.4 mg, 0.02 mmol, 10 mol%), dtbbpy (8.0 mg, 0.03 mmol, 15 mol%), TBADT (13.3 mg, 0.004 mmol, 2 mol%),  $\text{K}_3\text{PO}_4$  (50.9 mg, 0.24 mmol, 1.2 equiv), 1-bromo-4-methoxybenzene (37.4 mg, 0.20 mmol, 1.0 equiv), (*R*)-4-(chloromethyl)-2,2-dimethyl-1,3-dioxolane (150 mg, 1.0 mmol, 5.0 equiv) and anhydrous MeCN (1 mL) and was purified by silica gel column chromatography (PE/EA = 30/1) to obtain **9f** as colorless oil (35.8 mg, 70% yield, d.r. > 20/1).  $R_f$  = 0.5 (PE/EA = 30/1).

$^1\text{H}$  NMR (600 MHz,  $\text{CDCl}_3$ )  $\delta$  7.36 – 7.27 (m, 2H), 6.94 – 6.89 (m, 2H), 4.83 (d,  $J$  = 8.3 Hz, 1H), 4.03 – 3.98 (m, 1H), 3.81 (s, 3H), 3.71 (dd,  $J$  = 12.0, 3.6 Hz, 1H), 3.59 (dd,  $J$  = 12.0, 4.9 Hz, 1H), 1.58 (s, 3H), 1.54 (s, 3H);

$^{13}\text{C}$  NMR (151 MHz,  $\text{CDCl}_3$ )  $\delta$  159.9, 128.8, 128.0, 114.1, 109.6, 82.2, 80.2, 55.3, 43.0, 27.2, 26.9;

HRMS: (ESI) calcd for  $\text{C}_{13}\text{H}_{18}\text{ClO}_3^+[\text{M}+\text{H}]^+$  257.0944; found 257.0948.

***N*-(4-((4*S*,5*R*)-5-(chloromethyl)-2,2-dimethyl-1,3-dioxolan-4-yl)phenyl)acetamide (9g)**

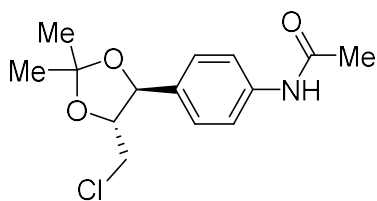

Chemical Formula: C<sub>14</sub>H<sub>18</sub>ClNO<sub>3</sub>

Exact Mass: 283.0975

**9g** was prepared according to general procedure **2.3** using NiBr<sub>2</sub>•dme (6.4 mg, 0.02 mmol, 10 mol%), dtbbpy (8.0 mg, 0.03 mmol, 15 mol%), TBADT (13.3 mg, 0.004 mmol, 2 mol%), K<sub>3</sub>PO<sub>4</sub> (50.9 mg, 0.24 mmol, 1.2 equiv), *N*-(4-bromophenyl)acetamide (42.8 mg, 0.20 mmol, 1.0 equiv), (*R*)-4-(chloromethyl)-2,2-dimethyl-1,3-dioxolane (150 mg, 1.0 mmol, 5.0 equiv) and anhydrous MeCN (1 mL) and was purified by silica gel column chromatography (PE/EA = 1/1) to obtain **9g** as colorless oil (35.7 mg, 63% yield, d.r. > 20/1). R<sub>f</sub> = 0.4 (PE/EA = 2/1).

<sup>1</sup>H NMR (600 MHz, CDCl<sub>3</sub>) δ 7.58 (s, 1H), 7.52 (d, *J* = 8.4 Hz, 2H), 7.34 (d, *J* = 8.5 Hz, 2H), 4.85 (d, *J* = 8.2 Hz, 1H), 4.02 – 3.97 (m, 1H), 3.72 (dd, *J* = 12.0, 3.7 Hz, 1H), 3.59 (dd, *J* = 12.1, 4.8 Hz, 1H), 2.17 (s, 3H), 1.58 (s, 3H), 1.54 (s, 3H);

<sup>13</sup>C NMR (151 MHz, CDCl<sub>3</sub>) δ 168.6, 138.2, 132.8, 127.4, 120.1, 109.8, 82.3, 80.1, 42.9, 27.2, 27.0, 24.6;

HRMS: (ESI) calcd for C<sub>14</sub>H<sub>19</sub>ClNO<sub>3</sub><sup>+</sup>[M+H]<sup>+</sup> 284.1048; found 284.1045.

#### 4-((4*S*,5*R*)-5-(chloromethyl)-2,2-dimethyl-1,3-dioxolan-4-yl)phenyl pivalate (**9h**)

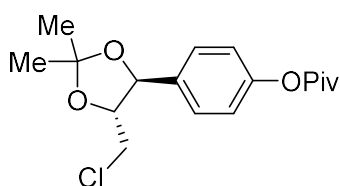

Chemical Formula: C<sub>17</sub>H<sub>23</sub>ClO<sub>4</sub>

Exact Mass: 326.1285

**9h** was prepared according to general procedure **2.3** using NiBr<sub>2</sub>•dme (6.4 mg, 0.02 mmol, 10 mol%), dtbbpy (8.0 mg, 0.03 mmol, 15 mol%), TBADT (13.3 mg, 0.004 mmol, 2 mol%), K<sub>3</sub>PO<sub>4</sub> (50.9 mg, 0.24 mmol, 1.2 equiv), 4-bromophenyl pivalate (51.4 mg, 0.20 mmol, 1.0 equiv), (*R*)-4-(chloromethyl)-2,2-dimethyl-1,3-dioxolane (150 mg, 1.0 mmol, 5.0 equiv) and anhydrous MeCN (1 mL) and was purified by silica gel column chromatography (PE/EA = 20/1) to obtain **9h** as colorless oil (43.0 mg, 66% yield, d.r. > 20/1). R<sub>f</sub> = 0.6 (PE/EA = 10/1).

$^1\text{H}$  NMR (600 MHz,  $\text{CDCl}_3$ )  $\delta$  7.43 – 7.38 (m, 2H), 7.09 – 7.05 (m, 2H), 4.91 (d,  $J = 8.2$  Hz, 1H), 4.02 – 3.98 (m, 1H), 3.74 (dd,  $J = 12.1, 3.6$  Hz, 1H), 3.60 (dd,  $J = 12.1, 4.6$  Hz, 1H), 1.58 (s, 3H), 1.54 (s, 3H), 1.36 (s, 9H);

$^{13}\text{C}$  NMR (151 MHz,  $\text{CDCl}_3$ )  $\delta$  177.0, 151.3, 134.5, 127.6, 121.9, 109.9, 82.3, 79.9, 42.8, 39.1, 27.2, 27.1, 27.0;

HRMS: (ESI) calcd for  $\text{C}_{17}\text{H}_{24}\text{ClO}_4^+[\text{M}+\text{H}]^+$  327.1357; found 327.1356.

**(4*S*,5*R*)-4-([1,1'-biphenyl]-4-yl)-5-(chloromethyl)-2,2-dimethyl-1,3-dioxolane (9i)**

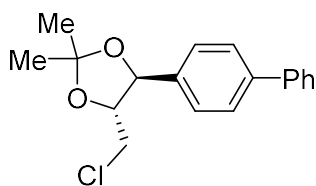

Chemical Formula:  $\text{C}_{18}\text{H}_{19}\text{ClO}_2$

Exact Mass: 302.1074

**9i** was prepared according to general procedure **2.3** using  $\text{NiBr}_2\cdot\text{dme}$  (6.4 mg, 0.02 mmol, 10 mol%), dtbbpy (8.0 mg, 0.03 mmol, 15 mol%), TBADT (13.3 mg, 0.004 mmol, 2 mol%),  $\text{K}_3\text{PO}_4$  (50.9 mg, 0.24 mmol, 1.2 equiv), 4-bromo-1,1'-biphenyl (46.6 mg, 0.20 mmol, 1.0 equiv), (*R*)-4-(chloromethyl)-2,2-dimethyl-1,3-dioxolane (150 mg, 1.0 mmol, 5.0 equiv) and anhydrous MeCN (1 mL) and was purified by silica gel column chromatography (PE/EtOAc = 50/1) to obtain **9i** as colorless solid (39.8 mg, 66% yield).

$^1\text{H}$  NMR (600 MHz,  $\text{CDCl}_3$ )  $\delta$  7.64 – 7.57 (m, 4H), 7.50 – 7.43 (m, 4H), 7.39 – 7.35 (m, 1H), 4.95 (d,  $J = 8.2$  Hz, 1H), 4.12 – 4.07 (m, 1H), 3.79 (dd,  $J = 12.0, 3.6$  Hz, 1H), 3.66 (dd,  $J = 12.1, 4.8$  Hz, 1H), 1.63 (s, 3H), 1.58 (s, 3H);

$^{13}\text{C}$  NMR (151 MHz,  $\text{CDCl}_3$ )  $\delta$  141.6, 140.6, 136.1, 128.8, 127.5, 127.09, 127.05, 109.9, 82.3, 80.2, 43.0, 27.2, 27.0;

HRMS: (ESI) calcd for  $\text{C}_{18}\text{H}_{20}\text{ClO}_2^+[\text{M}+\text{H}]^+$  303.1152; found 303.1154.

**5-((4*S*,5*R*)-5-(chloromethyl)-2,2-dimethyl-1,3-dioxolan-4-yl)isobenzofuran-1(3*H*)-one (9j)**

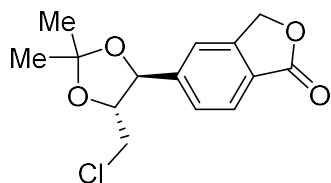

Chemical Formula: C<sub>14</sub>H<sub>15</sub>ClO<sub>4</sub>

Exact Mass: 282.0659

**9j** was prepared according to general procedure **2.3** using NiBr<sub>2</sub>•dme (6.4 mg, 0.02 mmol, 10 mol%), dtbbpy (8.0 mg, 0.03 mmol, 15 mol%), TBADT (13.3 mg, 0.004 mmol, 2 mol%), K<sub>3</sub>PO<sub>4</sub> (50.9 mg, 0.24 mmol, 1.2 equiv), 5-bromoisobenzofuran-1(3*H*)-one (42.6 mg, 0.20 mmol, 1.0 equiv), (*R*)-4-(chloromethyl)-2,2-dimethyl-1,3-dioxolane (150 mg, 1.0 mmol, 5.0 equiv) and anhydrous MeCN (1 mL) and was purified by silica gel column chromatography (PE/EA = 3/1) to obtain **9j** as colorless oil (43.4 mg, 77% yield, d.r. > 20/1). R<sub>f</sub> = 0.3 (PE/EA = 3/1).

<sup>1</sup>H NMR (600 MHz, CDCl<sub>3</sub>) δ 7.92 (d, *J* = 7.8 Hz, 1H), 7.58 – 7.54 (m, 2H), 5.33 (s, 2H), 5.05 (d, *J* = 8.0 Hz, 1H), 4.02 (dt, *J* = 8.2, 4.2 Hz, 1H), 3.78 (dd, *J* = 12.1, 4.3 Hz, 1H), 3.65 (dd, *J* = 12.1, 4.2 Hz, 1H), 1.59 (s, 3H), 1.55 (s, 3H);

<sup>13</sup>C NMR (151 MHz, CDCl<sub>3</sub>) δ 170.5, 147.2, 144.5, 127.5, 126.1, 126.0, 120.1, 110.4, 82.2, 80.0, 69.5, 42.6, 27.1, 26.9;

HRMS: (ESI) calcd for C<sub>14</sub>H<sub>16</sub>ClO<sub>4</sub><sup>+</sup>[M+H]<sup>+</sup> 283.0732; found 283.0733.

#### 5-((4*S*,5*R*)-5-(chloromethyl)-2,2-dimethyl-1,3-dioxolan-4-yl)-1-methyl-1*H*-indole (**9k**)

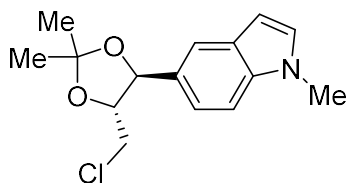

Chemical Formula: C<sub>15</sub>H<sub>18</sub>ClNO<sub>2</sub>

Exact Mass: 279.1026

**9k** was prepared according to general procedure **2.3** using NiBr<sub>2</sub>•dme (6.4 mg, 0.02 mmol, 10 mol%), dtbbpy (8.0 mg, 0.03 mmol, 15 mol%), TBADT (13.3 mg, 0.004 mmol, 2 mol%), K<sub>3</sub>PO<sub>4</sub> (50.9 mg, 0.24 mmol, 1.2 equiv), 5-bromo-1-methyl-1*H*-indole (42.0 mg, 0.20 mmol, 1.0 equiv), (*R*)-4-(chloromethyl)-2,2-dimethyl-1,3-dioxolane (150 mg, 1.0 mmol, 5.0 equiv) and anhydrous MeCN (1 mL) and was purified by silica gel column chromatography (PE/EA

= 15/1) to obtain **9k** as yellow oil (29.6 mg, 53% yield, d.r. > 20/1).  $R_f = 0.7$  (PE/EA = 10/1).

$^1\text{H NMR}$  (600 MHz,  $\text{CDCl}_3$ )  $\delta$  7.64 (d,  $J = 1.6$  Hz, 1H), 7.33 (d,  $J = 8.4$  Hz, 1H), 7.28 – 7.24 (m, 1H), 7.07 (d,  $J = 3.1$  Hz, 1H), 6.48 (dd,  $J = 3.1, 0.9$  Hz, 1H), 4.98 (d,  $J = 8.4$  Hz, 1H), 4.12 – 4.06 (m, 1H), 3.79 (s, 3H), 3.74 (dd,  $J = 12.0, 3.2$  Hz, 1H), 3.60 (dd,  $J = 12.0, 5.0$  Hz, 1H), 1.64 (s, 3H), 1.57 (s, 3H);

$^{13}\text{C NMR}$  (151 MHz,  $\text{CDCl}_3$ )  $\delta$  136.9, 129.6, 128.5, 127.5, 120.1, 119.5, 109.6, 109.5, 101.1, 82.7, 81.2, 43.2, 33.0, 27.4, 27.1;

HRMS: (ESI) calcd for  $\text{C}_{15}\text{H}_{19}\text{ClNO}_2^+[\text{M}+\text{H}]^+$  280.1098; found 280.1095.

**(4*S*,5*R*)-4-(benzo[*b*]thiophen-5-yl)-5-(chloromethyl)-2,2-dimethyl-1,3-dioxolane (9l)**

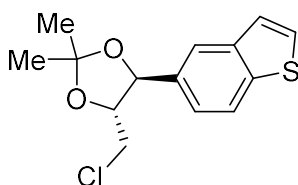

Chemical Formula:  $\text{C}_{14}\text{H}_{15}\text{ClO}_2\text{S}$   
Exact Mass: 282.0481

**9l** was prepared according to general procedure **2.3** using  $\text{NiBr}_2 \cdot \text{dme}$  (6.4 mg, 0.02 mmol, 10 mol%), dtbbpy (8.0 mg, 0.03 mmol, 15 mol%), TBADT (13.3 mg, 0.004 mmol, 2 mol%),  $\text{K}_3\text{PO}_4$  (50.9 mg, 0.24 mmol, 1.2 equiv), 5-bromobenzo[*b*]thiophene (42.6 mg, 0.20 mmol, 1.0 equiv), (*R*)-4-(chloromethyl)-2,2-dimethyl-1,3-dioxolane (150 mg, 1.0 mmol, 5.0 equiv) and anhydrous MeCN (1 mL) and was purified by silica gel column chromatography (PE/EA = 50/1) to obtain **9l** as yellow oil (32.1 mg, 57% yield, d.r. > 20/1).  $R_f = 0.5$  (PE/EA = 50/1).

$^1\text{H NMR}$  (600 MHz,  $\text{CDCl}_3$ )  $\delta$  7.90 (d,  $J = 8.3$  Hz, 1H), 7.85 (d,  $J = 1.6$  Hz, 1H), 7.49 (d,  $J = 5.4$  Hz, 1H), 7.39 (dd,  $J = 8.3, 1.7$  Hz, 1H), 7.35 (dd,  $J = 5.4, 0.8$  Hz, 1H), 5.03 (d,  $J = 8.2$  Hz, 1H), 4.11 – 4.07 (m, 1H), 3.77 (dd,  $J = 12.1, 3.6$  Hz, 1H), 3.64 (dd,  $J = 12.1, 4.7$  Hz, 1H), 1.64 (s, 3H), 1.58 (s, 3H);

$^{13}\text{C NMR}$  (151 MHz,  $\text{CDCl}_3$ )  $\delta$  140.0, 139.8, 133.3, 127.4, 123.8, 122.9, 122.6, 121.8, 109.9, 82.5, 80.5, 42.9, 27.3, 27.0;

HRMS: (ESI) calcd for  $\text{C}_{14}\text{H}_{16}\text{ClO}_2\text{S}^+[\text{M}+\text{H}]^+$  283.0560; found 283.0561.

**methyl 5-((4*R*,5*R*)-5-(chloromethyl)-2,2-dimethyl-1,3-dioxolan-4-yl)furan-2-carboxylate**

**(9m)**

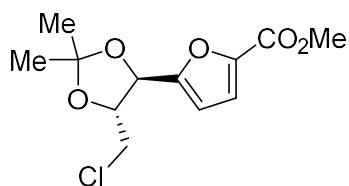

Chemical Formula: C<sub>12</sub>H<sub>15</sub>ClO<sub>5</sub>

Exact Mass: 274.0608

**9m** was prepared according to general procedure **2.3** using NiBr<sub>2</sub>•dme (6.4 mg, 0.02 mmol, 10 mol%), dtbbpy (8.0 mg, 0.03 mmol, 15 mol%), TBADT (13.3 mg, 0.004 mmol, 2 mol%), K<sub>3</sub>PO<sub>4</sub> (50.9 mg, 0.24 mmol, 1.2 equiv), methyl 5-bromofuran-2-carboxylate (41.0 mg, 0.20 mmol, 1.0 equiv), (*R*)-4-(chloromethyl)-2,2-dimethyl-1,3-dioxolane (150 mg, 1.0 mmol, 5.0 equiv) and anhydrous MeCN (1 mL) and was purified by silica gel column chromatography (PE/EA = 10/1) to obtain **9m** as colorless oil (33.4 mg, 61% yield, d.r. > 20/1). R<sub>f</sub> = 0.6 (PE/EA = 10/1).

<sup>1</sup>H NMR (600 MHz, CDCl<sub>3</sub>) δ 7.14 (d, *J* = 3.5 Hz, 1H), 6.51 (d, *J* = 3.5 Hz, 1H), 4.94 (d, *J* = 7.7 Hz, 1H), 4.51 – 4.46 (m, 1H), 3.88 (s, 3H), 3.75 (dd, *J* = 11.9, 4.7 Hz, 1H), 3.68 (dd, *J* = 11.9, 4.8 Hz, 1H), 1.51 (d, *J* = 5.7 Hz, 6H);

<sup>13</sup>C NMR (151 MHz, CDCl<sub>3</sub>) δ 158.9, 155.0, 144.9, 118.7, 111.2, 110.7, 79.0, 74.2, 52.0, 43.3, 27.0, 26.7;

HRMS: (ESI) calcd for C<sub>12</sub>H<sub>16</sub>O<sub>5</sub>Cl<sup>+</sup>[M+H]<sup>+</sup> 275.0681; found 275.0673.

#### 4-((4*S*,5*R*)-5-(chloromethyl)-2,2-dimethyl-1,3-dioxolan-4-yl)-5-methyl-2-phenyloxazole

**(9n)**

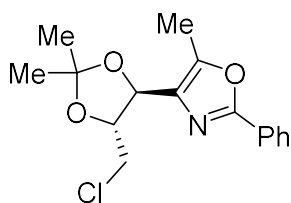

Chemical Formula: C<sub>16</sub>H<sub>18</sub>ClNO<sub>3</sub>

Exact Mass: 307.0975

**9n** was prepared according to general procedure **2.3** using NiBr<sub>2</sub>•dme (6.4 mg, 0.02 mmol, 10 mol%), dtbbpy (8.0 mg, 0.03 mmol, 15 mol%), TBADT (13.3 mg, 0.004 mmol, 2 mol%), K<sub>3</sub>PO<sub>4</sub> (50.9 mg, 0.24 mmol, 1.2 equiv), 4-bromo-5-methyl-2-phenyloxazole (47.6 mg, 0.20

mmol, 1.0 equiv), (*R*)-4-(chloromethyl)-2,2-dimethyl-1,3-dioxolane (150 mg, 1.0 mmol, 5.0 equiv) and anhydrous MeCN (1 mL) and was purified by silica gel column chromatography (PE/EA = 10/1) to obtain **9n** as yellow oil (31.3 mg, 51% yield, d.r. > 20/1).  $R_f = 0.6$  (PE/EA = 10/1).

$^1\text{H NMR}$  (600 MHz,  $\text{CDCl}_3$ )  $\delta$  8.02 – 7.96 (m, 2H), 7.46 – 7.38 (m, 3H), 4.90 (d,  $J = 8.0$  Hz, 1H), 4.62 – 4.58 (m, 1H), 3.82 (dd,  $J = 11.9, 4.1$  Hz, 1H), 3.69 (dd,  $J = 11.9, 4.8$  Hz, 1H), 2.44 (s, 3H), 1.61 (s, 3H), 1.55 (s, 3H);

$^{13}\text{C NMR}$  (151 MHz,  $\text{CDCl}_3$ )  $\delta$  160.2, 147.1, 132.1, 130.1, 128.7, 127.5, 126.2, 110.3, 79.1, 73.2, 43.6, 27.01, 26.95, 10.5;

HRMS: (ESI) calcd for  $\text{C}_{16}\text{H}_{19}\text{ClNO}_3^+[\text{M}+\text{H}]^+$  308.1048; found 308.1039.

#### 2-((4*R*,5*R*)-5-(chloromethyl)-2,2-dimethyl-1,3-dioxolan-4-yl)thiazole (**9o**)

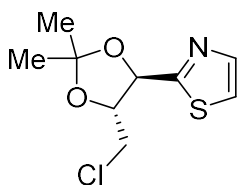

Chemical Formula:  $\text{C}_9\text{H}_{12}\text{ClNO}_2\text{S}$

Exact Mass: 233.0277

**9o** was prepared according to general procedure **2.3** using  $\text{NiBr}_2 \cdot \text{dme}$  (6.4 mg, 0.02 mmol, 10 mol%), dtbbpy (8.0 mg, 0.03 mmol, 15 mol%), TBADT (13.3 mg, 0.004 mmol, 2 mol%),  $\text{K}_3\text{PO}_4$  (50.9 mg, 0.24 mmol, 1.2 equiv), 2-bromothiazole (32.8 mg, 0.20 mmol, 1.0 equiv), (*R*)-4-(chloromethyl)-2,2-dimethyl-1,3-dioxolane (150 mg, 1.0 mmol, 5.0 equiv) and anhydrous MeCN (1 mL) and was purified by silica gel column chromatography (PE/EA = 20/1) to obtain **9o** as colorless oil (20.0 mg, 43% yield, d.r. > 20/1).  $R_f = 0.6$  (PE/EA = 20/1).

$^1\text{H NMR}$  (600 MHz,  $\text{CDCl}_3$ )  $\delta$  7.77 (d,  $J = 3.2$  Hz, 1H), 7.34 (d,  $J = 3.2$  Hz, 1H), 5.18 (d,  $J = 7.7$  Hz, 1H), 4.37 – 4.33 (m, 1H), 3.95 (dd,  $J = 12.0, 3.4$  Hz, 1H), 3.82 (dd,  $J = 12.0, 5.3$  Hz, 1H), 1.57 (s, 3H), 1.53 (s, 3H);

$^{13}\text{C NMR}$  (151 MHz,  $\text{CDCl}_3$ )  $\delta$  169.0, 143.1, 119.4, 111.4, 81.2, 77.7, 43.3, 27.0, 26.8;

HRMS: (ESI) calcd for  $\text{C}_9\text{H}_{13}\text{ClNO}_2\text{S}^+[\text{M}+\text{H}]^+$  234.0350; found 234.0344.

#### 5-((4*S*,5*R*)-5-(chloromethyl)-2,2-dimethyl-1,3-dioxolan-4-yl)-2-(trifluoromethyl)pyridine



**(9p)**

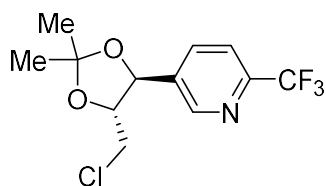

Chemical Formula: C<sub>12</sub>H<sub>13</sub>ClF<sub>3</sub>NO<sub>2</sub>

Exact Mass: 295.0587

**9p** was prepared according to general procedure **2.3** using NiBr<sub>2</sub>•dme (6.4 mg, 0.02 mmol, 10 mol%), dtbbpy (8.0 mg, 0.03 mmol, 15 mol%), TBADT (13.3 mg, 0.004 mmol, 2 mol%), K<sub>3</sub>PO<sub>4</sub> (50.9 mg, 0.24 mmol, 1.2 equiv), 5-bromo-2-(trifluoromethyl)pyridine (45.2 mg, 0.20 mmol, 1.0 equiv), (*R*)-4-(chloromethyl)-2,2-dimethyl-1,3-dioxolane (150 mg, 1.0 mmol, 5.0 equiv) and anhydrous MeCN (1 mL) and was purified by silica gel column chromatography (PE/EA = 10/1) to obtain **9p** as colorless oil (50.1 mg, 85% yield, d.r. > 20/1). R<sub>f</sub> = 0.5 (PE/EA = 5/1).

<sup>1</sup>H NMR (600 MHz, CDCl<sub>3</sub>) δ 8.76 (d, *J* = 2.1 Hz, 1H), 7.93 (dd, *J* = 8.2, 2.2 Hz, 1H), 7.71 (d, *J* = 8.1 Hz, 1H), 5.04 (d, *J* = 7.8 Hz, 1H), 4.08 – 4.02 (m, 1H), 3.76 (dd, *J* = 12.0, 5.1 Hz, 1H), 3.68 (dd, *J* = 12.0, 4.2 Hz, 1H), 1.57 (s, 3H), 1.55 (s, 3H);

<sup>13</sup>C NMR (151 MHz, CDCl<sub>3</sub>) δ 148.6, 148.3 (q, *J* = 35.0 Hz), 136.8, 135.7, 121.4 (q, *J* = 274.1 Hz), 120.4 (q, *J* = 2.7 Hz), 110.9, 82.0, 78.3, 42.6, 27.0, 26.9;

<sup>19</sup>F NMR (565 MHz, CDCl<sub>3</sub>) δ -67.93.

HRMS: (ESI) calcd for C<sub>12</sub>H<sub>14</sub>ClF<sub>3</sub>NO<sub>2</sub><sup>+</sup>[M+H]<sup>+</sup> 296.0659; found 296.0650.

**5-((4*S*,5*R*)-5-(chloromethyl)-2,2-dimethyl-1,3-dioxolan-4-yl)pyrimidine (9q)**

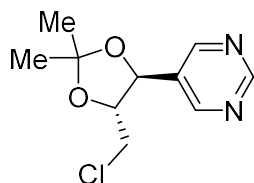

Chemical Formula: C<sub>10</sub>H<sub>13</sub>ClN<sub>2</sub>O<sub>2</sub>

Exact Mass: 228.0666

**9q** was prepared according to general procedure **2.3** using NiBr<sub>2</sub>•dme (6.4 mg, 0.02 mmol, 10 mol%), dtbbpy (8.0 mg, 0.03 mmol, 15 mol%), TBADT (13.3 mg, 0.004 mmol, 2 mol%), K<sub>3</sub>PO<sub>4</sub> (50.9 mg, 0.24 mmol, 1.2 equiv), 5-bromopyrimidine (31.8 mg, 0.20 mmol, 1.0 equiv),

(*R*)-4-(chloromethyl)-2,2-dimethyl-1,3-dioxolane (150 mg, 1.0 mmol, 5.0 equiv) and anhydrous MeCN (1 mL) and was purified by silica gel column chromatography (PE/EA = 3/1) to obtain **9q** as colorless oil (35.6 mg, 78% yield, d.r. > 20/1).  $R_f = 0.7$  (PE/EA = 3/1).

$^1\text{H NMR}$  (600 MHz,  $\text{CDCl}_3$ )  $\delta$  9.20 (s, 1H), 8.79 (s, 2H), 4.96 (d,  $J = 7.8$  Hz, 1H), 4.12 – 4.07 (m, 1H), 3.74 (dd,  $J = 11.9, 5.6$  Hz, 1H), 3.69 (dd,  $J = 11.9, 4.2$  Hz, 1H), 1.57 (s, 3H), 1.54 (s, 3H);

$^{13}\text{C NMR}$  (151 MHz,  $\text{CDCl}_3$ )  $\delta$  158.9, 155.7, 131.4, 110.9, 81.8, 77.28, 42.7, 27.1, 26.8;

HRMS: (ESI) calcd for  $\text{C}_{10}\text{H}_{14}\text{ClN}_2\text{O}_2^+[\text{M}+\text{H}]^+$  229.0738; found 229.0730.

**methyl 2-((4*S*,5*S*)-5-(4-acetylphenyl)-2,2-dimethyl-1,3-dioxolan-4-yl)acetate (**9r**)**

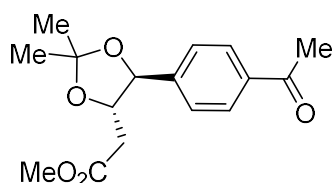

Chemical Formula:  $\text{C}_{16}\text{H}_{20}\text{O}_5$   
Exact Mass: 292.1311

**9r** was prepared according to general procedure **2.3** using  $\text{NiBr}_2 \cdot \text{dme}$  (6.4 mg, 0.02 mmol, 10 mol%), dtbbpy (8.0 mg, 0.03 mmol, 15 mol%), TBADT (13.3 mg, 0.004 mmol, 2 mol%),  $\text{K}_3\text{PO}_4$  (50.9 mg, 0.24 mmol, 1.2 equiv), 1-(4-bromophenyl)ethan-1-one (40.0 mg, 0.20 mmol, 1.0 equiv), methyl (*S*)-2-(2,2-dimethyl-1,3-dioxolan-4-yl)acetate (174 mg, 1.0 mmol, 5.0 equiv) and anhydrous MeCN (1 mL) and was purified by silica gel column chromatography (PE/EA = 5/1) to obtain **9r** as colorless oil (52.6 mg, 90% yield, d.r. > 20/1).  $R_f = 0.4$  (PE/EA = 5/1).

$^1\text{H NMR}$  (600 MHz,  $\text{CDCl}_3$ )  $\delta$  7.98 – 7.93 (m, 2H), 7.49 – 7.45 (m, 2H), 4.72 (d,  $J = 8.5$  Hz, 1H), 4.18 – 4.13 (m, 1H), 3.60 (s, 3H), 2.66 – 2.57 (m, 2H), 2.58 (s, 3H), 1.57 (s, 3H), 1.50 (s, 3H);

$^{13}\text{C NMR}$  (151 MHz,  $\text{CDCl}_3$ )  $\delta$  197.6, 170.5, 142.4, 137.3, 128.7, 126.9, 109.8, 81.9, 79.3, 51.9, 36.4, 27.2, 27.0, 26.7;

HRMS: (ESI) calcd for  $\text{C}_{16}\text{H}_{21}\text{O}_5^+[\text{M}+\text{H}]^+$  293.1389; found 293.1393.

**((4*S*,5*S*)-5-(4-acetylphenyl)-2,2-dimethyl-1,3-dioxolan-4-yl)methyl acetate (**9s**)**

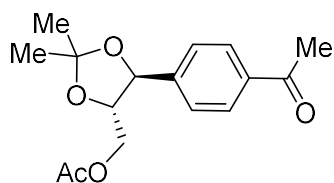

Chemical Formula: C<sub>16</sub>H<sub>20</sub>O<sub>5</sub>

Exact Mass: 292.1311

**9s** was prepared according to general procedure **2.3** using NiBr<sub>2</sub>•dme (6.4 mg, 0.02 mmol, 10 mol%), dtbbpy (8.0 mg, 0.03 mmol, 15 mol%), TBADT (13.3 mg, 0.004 mmol, 2 mol%), K<sub>3</sub>PO<sub>4</sub> (50.9 mg, 0.24 mmol, 1.2 equiv), 1-(4-bromophenyl)ethan-1-one (40.0 mg, 0.20 mmol, 1.0 equiv), (*R*)-(2,2-dimethyl-1,3-dioxolan-4-yl)methyl acetate (174 mg, 1.0 mmol, 5.0 equiv) and anhydrous MeCN (1 mL) and was purified by silica gel column chromatography (PE/EA = 5/1) to obtain **9s** as colorless oil (45.0 mg, 77% yield, d.r. > 20/1). R<sub>f</sub> = 0.4 (PE/EA = 5/1).

<sup>1</sup>H NMR (600 MHz, CDCl<sub>3</sub>) δ 7.99 – 7.94 (m, 2H), 7.52 – 7.46 (m, 2H), 4.83 (d, *J* = 8.5 Hz, 1H), 4.36 (dd, *J* = 12.0, 3.4 Hz, 1H), 4.17 (dd, *J* = 12.1, 5.6 Hz, 1H), 4.01 – 3.97 (m, 1H), 2.60 (s, 3H), 2.06 (s, 3H), 1.59 (s, 3H), 1.53 (s, 3H);

<sup>13</sup>C NMR (151 MHz, CDCl<sub>3</sub>) δ 197.6, 170.7, 142.8, 137.2, 128.8, 126.6, 110.3, 80.9, 79.3, 62.8, 27.0, 26.9, 26.7, 20.8;

HRMS: (ESI) calcd for C<sub>16</sub>H<sub>21</sub>O<sub>5</sub><sup>+</sup>[M+H]<sup>+</sup> 293.1389; found 293.1384.

#### ***S*-(((4*R*,5*S*)-5-(4-acetylphenyl)-2,2-dimethyl-1,3-dioxolan-4-yl)methyl) ethanethioate (**9t**)**

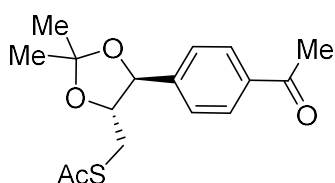

Chemical Formula: C<sub>16</sub>H<sub>20</sub>O<sub>4</sub>S

Exact Mass: 308.1082

**9t** was prepared according to general procedure **2.3** using NiBr<sub>2</sub>•dme (6.4 mg, 0.02 mmol, 10 mol%), dtbbpy (8.0 mg, 0.03 mmol, 15 mol%), TBADT (13.3 mg, 0.004 mmol, 2 mol%), K<sub>3</sub>PO<sub>4</sub> (50.9 mg, 0.24 mmol, 1.2 equiv), 1-(4-bromophenyl)ethan-1-one (40.0 mg, 0.20 mmol, 1.0 equiv), (*R*)-*S*-((2,2-dimethyl-1,3-dioxolan-4-yl)methyl) ethanethioate (190 mg, 1.0 mmol, 5.0 equiv) and anhydrous MeCN (1 mL) and was purified by silica gel column chromatography (PE/EA = 5/1) to obtain **9t** as yellow oil (43.7 mg, 71% yield, d.r. > 20/1). R<sub>f</sub> = 0.5 (PE/EA =

5/1).

$^1\text{H}$  NMR (600 MHz,  $\text{CDCl}_3$ )  $\delta$  7.99 – 7.92 (m, 2H), 7.52 – 7.46 (m, 2H), 4.70 (d,  $J$  = 8.2 Hz, 1H), 4.00 – 3.92 (m, 1H), 3.27 (dd,  $J$  = 14.2, 4.1 Hz, 1H), 3.18 (dd,  $J$  = 14.2, 5.6 Hz, 1H), 2.59 (s, 4H), 2.33 (s, 4H), 1.53 (s, 3H), 1.51 (s, 3H);

$^{13}\text{C}$  NMR (151 MHz,  $\text{CDCl}_3$ )  $\delta$  197.7, 195.0, 142.8, 137.1, 128.7, 126.7, 109.9, 81.3, 81.2, 30.5, 29.8, 27.1, 27.0, 26.7;

HRMS: (ESI) calcd for  $\text{C}_{16}\text{H}_{21}\text{O}_4\text{S}^+[\text{M}+\text{H}]^+$  309.1155; found 309.1154.

**methyl (4*R*,5*S*)-5-(4-acetylphenyl)-2,2-dimethyl-1,3-dioxolane-4-carboxylate (9u)**

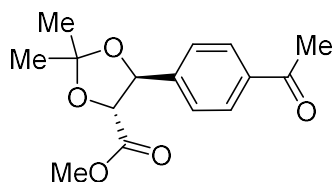

Chemical Formula:  $\text{C}_{15}\text{H}_{18}\text{O}_5$

Exact Mass: 278.1154

**9u** was prepared according to general procedure **2.3** using  $\text{NiBr}_2\cdot\text{dme}$  (6.4 mg, 0.02 mmol, 10 mol%), dtbbpy (8.0 mg, 0.03 mmol, 15 mol%), TBADT (13.3 mg, 0.004 mmol, 2 mol%),  $\text{K}_3\text{PO}_4$  (50.9 mg, 0.24 mmol, 1.2 equiv), 1-(4-bromophenyl)ethan-1-one (40.0 mg, 0.20 mmol, 1.0 equiv), methyl (*R*)-2,2-dimethyl-1,3-dioxolane-4-carboxylate (160 mg, 1.0 mmol, 5.0 equiv) and anhydrous MeCN (1 mL) and was purified by silica gel column chromatography (PE/EA = 5/1) to obtain **9u** as yellow oil (47.3 mg, 85% yield, d.r. > 20/1).  $R_f$  = 0.5 (PE/EA = 5/1).

$^1\text{H}$  NMR (600 MHz,  $\text{CDCl}_3$ )  $\delta$  7.98 – 7.93 (m, 2H), 7.55 – 7.50 (m, 2H), 5.21 (d,  $J$  = 7.6 Hz, 1H), 4.32 (d,  $J$  = 7.6 Hz, 1H), 3.79 (s, 3H), 2.59 (s, 3H), 1.60 (s, 3H), 1.55 (s, 3H);

$^{13}\text{C}$  NMR (151 MHz,  $\text{CDCl}_3$ )  $\delta$  197.7, 170.5, 143.1, 137.2, 128.7, 126.6, 112.1, 81.1, 80.1, 52.6, 26.8, 26.7, 25.8;

HRMS: (ESI) calcd for  $\text{C}_{15}\text{H}_{19}\text{O}_5^+[\text{M}+\text{H}]^+$  279.1227; found 279.1225.

**4-((4*S*,5*R*)-5-(chloromethyl)-2,2-dimethyl-1,3-dioxolan-4-yl)-*N*-((1*S*,4*S*)-4-(3,4-dichlorophenyl)-1,2,3,4-tetrahydronaphthalen-1-yl)-*N*-methylbenzamide (9v)**

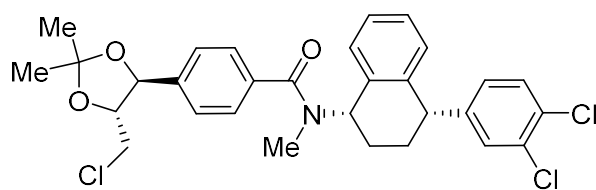

Chemical Formula:  $C_{30}H_{30}Cl_3NO_3$

Exact Mass: 557.1291

**9v** was prepared according to general procedure **2.3** using  $NiBr_2 \cdot dme$  (6.4 mg, 0.02 mmol, 10 mol%), dtbbpy (8.0 mg, 0.03 mmol, 15 mol%), TBADT (13.3 mg, 0.004 mmol, 2 mol%),  $K_3PO_4$  (50.9 mg, 0.24 mmol, 1.2 equiv), 4-bromo-*N*-((1*S*,4*S*)-4-(3,4-dichlorophenyl)-1,2,3,4-tetrahydronaphthalen-1-yl)-*N*-methylbenzamide (97.8 mg, 0.20 mmol, 1.0 equiv), (*R*)-4-(chloromethyl)-2,2-dimethyl-1,3-dioxolane (150 mg, 1.0 mmol, 5.0 equiv) and anhydrous MeCN (1 mL) and was purified by silica gel column chromatography (PE/EA = 3/1) to obtain **9v** as colorless oil (85.8 mg, 77% yield, d.r. > 20/1).  $R_f$  = 0.4 (PE/EA = 3/1).

$^1H$  NMR (600 MHz,  $CDCl_3$ )  $\delta$  7.56 – 7.42 (m, 4H), 7.36 – 7.28 (m, 3H), 7.24 – 7.19 (m, 1H), 7.10 – 7.06 (m, 1H), 7.00 – 6.94 (m, 1H), 6.87 – 6.74 (m, 1H), 6.08 – 4.89 (m, 2H), 4.25 – 4.12 (m, 1H), 4.06 – 3.97 (m, 1H), 3.78 – 3.72 (m, 1H), 3.65 – 3.57 (m, 1H), 2.90 – 2.69 (m, 3H), 2.11 – 2.04 (m, 1H), 2.00 – 1.65 (m, 3H), 1.62 – 1.51 (m, 6H);

$^{13}C$  NMR (151 MHz,  $CDCl_3$ )  $\delta$  172.3, 172.0, 147.0, 146.7, 139.0, 138.8, 138.4, 138.0, 136.9, 135.7, 135.6, 132.5, 132.3, 131.2, 131.0, 130.7, 130.6, 130.3, 130.2, 130.1, 128.1, 127.97, 127.96, 127.8, 127.6, 127.5, 127.4, 127.2, 127.1, 126.8, 126.7, 126.5, 110.13, 110.10, 82.3, 82.2, 80.1, 80.0, 58.6, 52.8, 43.1, 42.8, 42.8, 42.9, 33.1, 30.1, 30.0, 29.0, 27.2, 27.0, 27.0, 22.6, 21.2; HRMS: (ESI) calcd for  $C_{30}H_{31}Cl_3NO_3^+[M+H]^+$  558.1364; found 558.1367.

**4-((4*S*,5*R*)-5-(chloromethyl)-2,2-dimethyl-1,3-dioxolan-4-yl)benzyl (2*S*,5*R*)-3,3-dimethyl-7-oxo-4-thia-1-azabicyclo[3.2.0]heptane-2-carboxylate 4,4-dioxide (**9w**)**

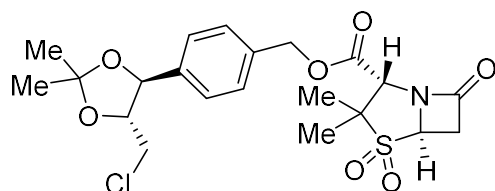

Chemical Formula:  $C_{21}H_{26}ClNO_7S$

Exact Mass: 471.1119

**9w** was prepared according to general procedure **2.3** using  $NiBr_2 \cdot dme$  (6.4 mg, 0.02 mmol, 10

mol%), dtbbpy (8.0 mg, 0.03 mmol, 15 mol%), TBADT (13.3 mg, 0.004 mmol, 2 mol%), K<sub>3</sub>PO<sub>4</sub> (50.9 mg, 0.24 mmol, 1.2 equiv), 4-bromobenzyl (2*S*,5*R*)-3,3-dimethyl-7-oxo-4-thia-1-azabicyclo[3.2.0]heptane-2-carboxylate 4,4-dioxide (80.4 mg, 0.20 mmol, 1.0 equiv), (*R*)-4-(chloromethyl)-2,2-dimethyl-1,3-dioxolane (150 mg, 1.0 mmol, 5.0 equiv) and anhydrous MeCN (1 mL) and was purified by silica gel column chromatography (PE/EA = 3/1) to obtain **9w** as colorless oil (50.8 mg, 54% yield, d.r. > 20/1). R<sub>f</sub> = 0.2 (PE/EA = 3/1).

<sup>1</sup>H NMR (600 MHz, CDCl<sub>3</sub>) δ 7.43 (d, *J* = 8.2 Hz, 2H), 7.38 (d, *J* = 8.2 Hz, 2H), 5.27 (d, *J* = 12.1 Hz, 1H), 5.18 (d, *J* = 12.1 Hz, 1H), 4.91 (d, *J* = 8.1 Hz, 1H), 4.59 (dd, *J* = 4.4, 2.1 Hz, 1H), 4.40 (s, 1H), 4.03 – 3.99 (m, 1H), 3.74 (dd, *J* = 12.1, 4.0 Hz, 1H), 3.61 (dd, *J* = 12.1, 4.6 Hz, 1H), 3.48 (dd, *J* = 16.2, 4.3 Hz, 1H), 3.43 (dd, *J* = 16.2, 2.1 Hz, 1H), 1.58 (s, 3H), 1.55 (s, 3H), 1.54 (s, 3H), 1.29 (s, 3H);

<sup>13</sup>C NMR (151 MHz, CDCl<sub>3</sub>) δ 170.8, 166.8, 138.3, 134.7, 129.2, 127.1, 110.1, 82.3, 80.1, 67.7, 63.2, 62.7, 61.1, 42.9, 38.3, 27.2, 27.0, 20.2, 18.6;

HRMS: (ESI) calcd for C<sub>21</sub>H<sub>27</sub>ClNO<sub>7</sub>S<sup>+</sup>[M+H]<sup>+</sup> 472.1191; found 472.1192.

**(3*aR*,5*R*,6*S*,6*aR*)-5-((*R*)-2,2-dimethyl-1,3-dioxolan-4-yl)-2,2-dimethyltetrahydrofuro[2,3-*d*][1,3]dioxol-6-yl 4-((4*S*,5*R*)-5-(chloromethyl)-2,2-dimethyl-1,3-dioxolan-4-yl)benzoate (**9x**)**

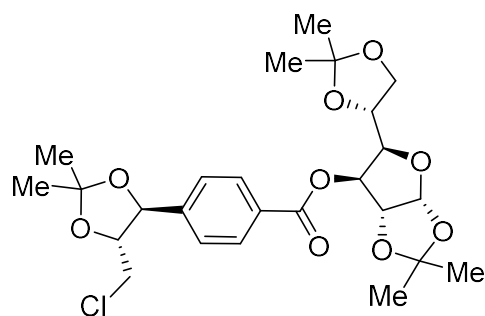

Chemical Formula: C<sub>25</sub>H<sub>33</sub>ClO<sub>9</sub>  
Exact Mass: 512.1813

**9x** was prepared according to general procedure **2.3** using NiBr<sub>2</sub>•dme (6.4 mg, 0.02 mmol, 10 mol%), dtbbpy (8.0 mg, 0.03 mmol, 15 mol%), TBADT (13.3 mg, 0.004 mmol, 2 mol%), K<sub>3</sub>PO<sub>4</sub> (50.9 mg, 0.24 mmol, 1.2 equiv), (3*aR*,5*R*,6*S*,6*aR*)-5-((*R*)-2,2-dimethyl-1,3-dioxolan-4-yl)-2,2-dimethyltetrahydrofuro[2,3-*d*][1,3]dioxol-6-yl 4-bromobenzoate (88.6 mg, 0.20 mmol, 1.0 equiv), (*R*)-4-(chloromethyl)-2,2-dimethyl-1,3-dioxolane (150 mg, 1.0 mmol, 5.0 equiv)

and anhydrous MeCN (1 mL) and was purified by silica gel column chromatography (PE/EA = 5/1) to obtain **9x** as colorless oil (63.5 mg, 62% yield, d.r. > 20/1).  $R_f = 0.4$  (PE/EA = 5/1).

$^1\text{H NMR}$  (600 MHz,  $\text{CDCl}_3$ )  $\delta$  8.03 (d,  $J = 8.1$  Hz, 2H), 7.49 (d,  $J = 8.1$  Hz, 2H), 5.94 (d,  $J = 3.6$  Hz, 1H), 5.49 (d,  $J = 2.7$  Hz, 1H), 4.97 (d,  $J = 8.0$  Hz, 1H), 4.62 (d,  $J = 3.7$  Hz, 1H), 4.37 – 4.30 (m, 2H), 4.12 – 4.05 (m, 2H), 4.03 – 3.98 (m, 1H), 3.75 (dd,  $J = 12.1, 4.1$  Hz, 1H), 3.62 (dd,  $J = 12.1, 4.4$  Hz, 1H), 1.58 (s, 3H), 1.55 (s, 6H), 1.40 (s, 3H), 1.31 (s, 3H), 1.26 (s, 3H);

$^{13}\text{C NMR}$  (151 MHz,  $\text{CDCl}_3$ )  $\delta$  164.8, 143.3, 130.2, 129.7, 126.7, 112.4, 110.4, 109.4, 105.1, 83.4, 82.2, 80.00, 79.95, 76.8, 72.6, 67.3, 42.8, 27.1, 27.0, 26.9, 26.7, 26.2, 25.2;

HRMS: (ESI) calcd for  $\text{C}_{25}\text{H}_{33}\text{ClO}_9\text{Na}^+[\text{M}+\text{Na}]^+$  535.1705; found 535.1707.

**(4*R*,5*S*)-4-(chloromethyl)-2,2-dimethyl-5-((*E*)-4-(methylsulfonyl)styryl)-1,3-dioxolane (**9y**)**

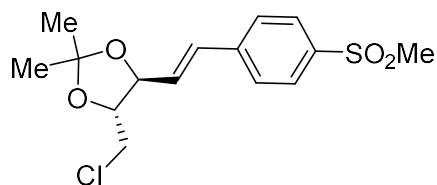

Chemical Formula:  $\text{C}_{15}\text{H}_{19}\text{ClO}_4\text{S}$

Exact Mass: 330.0693

**9y** was prepared according to general procedure **2.3** using  $\text{NiBr}_2 \cdot \text{dme}$  (3.3 mg, 0.01 mmol, 10 mol%), dtbbpy (4.2 mg, 0.015 mmol, 15 mol%), (*E*)-1-(2-bromovinyl)-4-(methylsulfonyl)benzene (26.2 mg, 0.10 mmol, 1 equiv), (*R*)-4-(chloromethyl)-2,2-dimethyl-1,3-dioxolane (75.2 mg, 0.5 mmol, 5 equiv), TBADT (6.8 mg, 0.002 mmol, 2 mol%), (*E*)-1,2-diphenylethene (18.0 mg, 0.1 mmol, 1 equiv),  $\text{K}_3\text{PO}_4$  (25.3 mg, 0.12 mmol, 1.2 equiv) and anhydrous MeCN (1 mL) and was purified by silica gel column chromatography (PE/EA = 3/1) to obtain **9y** as colorless oil (14.2 mg, 43% yield, d.r. > 20/1,  $E/Z = 16/1$ ).  $R_f = 0.3$  (PE/EA = 4/1).

$^1\text{H NMR}$  (600 MHz,  $\text{CDCl}_3$ )  $\delta$  7.90 (d,  $J = 8.4$  Hz, 2H), 7.58 (d,  $J = 8.4$  Hz, 2H), 6.79 (d,  $J = 15.9$  Hz, 1H), 6.37 (dd,  $J = 15.9, 7.0$  Hz, 1H), 4.56 – 4.52 (m, 1H), 4.06 (dt,  $J = 7.9, 4.9$  Hz, 1H), 3.74 – 3.66 (m, 2H), 3.05 (s, 3H), 1.50 (s, 3H), 1.49 (s, 3H);

$^{13}\text{C NMR}$  (151 MHz,  $\text{CDCl}_3$ )  $\delta$  141.4, 139.6, 131.9, 129.9, 127.8, 127.4, 110.3, 80.0, 79.8, 44.5, 43.3, 27.1, 26.9;

HRMS: (ESI) calcd for  $\text{C}_{15}\text{H}_{20}\text{ClO}_4\text{S}^+[\text{M}+\text{H}]^+$  331.0765; found 331.0761.

**(4R,5S)-4-(chloromethyl)-5-(1H-inden-2-yl)-2,2-dimethyl-1,3-dioxolane (9z)**

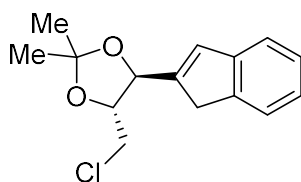

Chemical Formula: C<sub>15</sub>H<sub>17</sub>ClO<sub>2</sub>

Exact Mass: 264.0917

**9z** was prepared according to general procedure **2.3** using NiBr<sub>2</sub>•dme (3.3 mg, 0.01 mmol, 10 mol%), dtbbpy (4.2 mg, 0.015 mmol, 15 mol%), 2-bromo-1*H*-indene (19.4 mg, 0.10 mmol, 1 equiv), (*R*)-4-(chloromethyl)-2,2-dimethyl-1,3-dioxolane (75.2 mg, 0.5 mmol, 5 equiv), TBADT (6.8 mg, 0.002 mmol, 2 mol%), K<sub>3</sub>PO<sub>4</sub> (25.3 mg, 0.12 mmol, 1.2 equiv) and anhydrous MeCN (1 mL) and was purified by silica gel column chromatography (PE/EA = 50/1) to obtain **9z** as colorless oil (11.1 mg, 42% yield, d.r. > 20/1). R<sub>f</sub> = 0.5 (PE/EA = 50/1).

<sup>1</sup>H NMR (600 MHz, CDCl<sub>3</sub>) δ 7.48 – 7.42 (m, 1H), 7.38 – 7.32 (m, 1H), 7.30 – 7.26 (m, 1H), 7.20 (td, *J* = 7.4, 1.2 Hz, 1H), 6.91 – 6.85 (m, 1H), 4.88 (dd, *J* = 8.0, 0.9 Hz, 1H), 4.18 (ddd, *J* = 8.0, 5.1, 4.3 Hz, 1H), 3.74 (dd, *J* = 11.9, 4.3 Hz, 1H), 3.66 (dd, *J* = 11.8, 5.0 Hz, 1H), 3.56 (ddd, *J* = 22.6, 1.7, 0.8 Hz, 1H), 3.43 (ddd, *J* = 22.6, 1.7, 0.8 Hz, 1H), 1.52 (s, 6H);

<sup>13</sup>C NMR (151 MHz, CDCl<sub>3</sub>) δ 144.6, 143.9, 143.2, 130.4, 126.6, 125.1, 123.9, 121.2, 110.0, 80.0, 77.9, 43.6, 37.8, 27.2, 27.0;

HRMS: (ESI) calcd for C<sub>15</sub>H<sub>18</sub>ClO<sub>2</sub><sup>+</sup>[M+H]<sup>+</sup> 265.0995; found 265.0992.

**(4R,5R)-4-(chloromethyl)-5-((Z)-1-fluoro-2-(4-(methylsulfonyl)phenyl)vinyl)-2,2-dimethyl-1,3-dioxolane (9aa)**

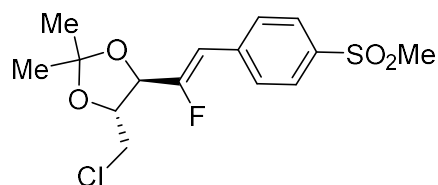

Chemical Formula: C<sub>15</sub>H<sub>18</sub>ClFO<sub>4</sub>S

Exact Mass: 348.0598

**9aa** was prepared according to general procedure **2.3** using NiBr<sub>2</sub>•dme (3.3 mg, 0.01 mmol, 10 mol%), dtbbpy (4.2 mg, 0.015 mmol, 15 mol%), 1-(2,2-difluorovinyl)-4-(methylsulfonyl)benzene (21.8 mg, 0.10 mmol, 1 equiv), (*R*)-4-(chloromethyl)-2,2-dimethyl-



1,3-dioxolane (75.2 mg, 0.5 mmol, 5 equiv), TBADT (6.8 mg, 0.002 mmol, 2 mol%), (*E*)-1,2-diphenylethene (18.0 mg, 0.1 mmol, 1 equiv), K<sub>3</sub>PO<sub>4</sub> (25.3 mg, 0.12 mmol, 1.2 equiv) and anhydrous MeCN (1 mL) and was purified by silica gel column chromatography (PE/EA = 3/1) to obtain **9aa** as colorless oil (16.3 mg, 47% yield, d.r. > 20/1, *E/Z* = 20/1). R<sub>f</sub> = 0.4 (PE/EA = 3/1).

<sup>1</sup>H NMR (600 MHz, CDCl<sub>3</sub>) δ 7.94 – 7.89 (m, 2H), 7.72 – 7.67 (m, 2H), 6.00 (d, *J* = 37.5 Hz, 1H), 4.52 (dd, *J* = 15.7, 7.6 Hz, 1H), 4.44 (dt, *J* = 7.6, 4.6 Hz, 1H), 3.80 (dd, *J* = 11.9, 4.6 Hz, 1H), 3.73 (dd, *J* = 11.9, 4.5 Hz, 1H), 3.06 (s, 3H), 1.53 (s, 6H);

<sup>13</sup>C NMR (151 MHz, CDCl<sub>3</sub>) δ 158.6, 156.8, 139.3, 137.7, 129.5 (d, *J* = 7.5 Hz), 127.7, 111.5, 107.9, 107.8, 44.5, 43.6, 27.1, 26.5;

<sup>19</sup>F NMR (565 MHz, CDCl<sub>3</sub>) δ -113.9 (dd, *J* = 37.6, 15.8 Hz).

HRMS: (ESI) calcd for C<sub>15</sub>H<sub>19</sub>ClFO<sub>4</sub>S<sup>+</sup>[M+H]<sup>+</sup> 349.0677; found 349.0672.

**(4*R*,5*S*)-4-(chloromethyl)-2,2-dimethyl-5-((4-(methylsulfonyl)phenyl)ethynyl)-1,3-dioxolane (9ab)**

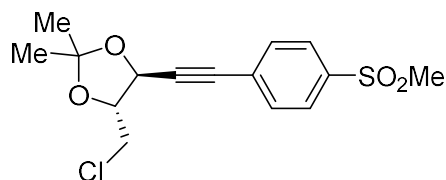

Chemical Formula: C<sub>15</sub>H<sub>17</sub>ClO<sub>4</sub>S

Exact Mass: 328.0536

**9ab** was prepared according to general procedure **2.3** using NiBr<sub>2</sub>•dme (3.3 mg, 0.01 mmol, 10 mol%), dtbbpy (4.2 mg, 0.015 mmol, 15 mol%), 1-(bromoethynyl)-4-(methylsulfonyl)benzene (26.0 mg, 0.1 mmol, 1 equiv), (*R*)-4-(chloromethyl)-2,2-dimethyl-1,3-dioxolane (75.2 mg, 0.5 mmol, 5 equiv), TBADT (6.8 mg, 0.002 mmol, 2 mol%), K<sub>3</sub>PO<sub>4</sub> (25.3 mg, 0.12 mmol, 1.2 equiv) and anhydrous MeCN (1 mL) and was purified by silica gel column chromatography (PE/EA = 3/1) to obtain **9ab** as colorless oil (15.7 mg, 48% yield, d.r. > 20/1). R<sub>f</sub> = 0.4 (PE/EA = 3/1).

<sup>1</sup>H NMR (600 MHz, CDCl<sub>3</sub>) δ 8.02 – 7.80 (m, 2H), 7.74 – 7.54 (m, 2H), 4.85 (d, *J* = 6.4 Hz, 1H), 4.43 (dt, *J* = 6.4, 5.1 Hz, 1H), 3.71 (d, *J* = 5.1 Hz, 2H), 3.06 (s, 3H), 1.57 (s, 3H), 1.49 (s, 3H);

$^{13}\text{C}$  NMR (151 MHz,  $\text{CDCl}_3$ )  $\delta$  140.4, 132.6, 127.8, 127.4, 111.8, 89.5, 85.0, 81.0, 44.5, 43.3, 27.1, 26.5;

HRMS: (ESI) calcd for  $\text{C}_{15}\text{H}_{18}\text{ClO}_4\text{S}^+[\text{M}+\text{H}]^+$  329.0614; found 329.0615.

**1-(4-((4*S*,6*R*)-2,2-dimethyl-6-(4-(methylsulfonyl)phenyl)-1,3-dioxan-4-yl)phenyl)ethan-1-one (10a)**

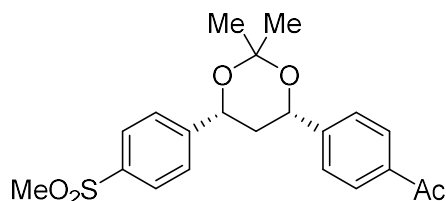

Chemical Formula:  $\text{C}_{21}\text{H}_{24}\text{O}_5\text{S}$   
Exact Mass: 388.1344

**10a** was prepared according to general procedure **2.4** using  $\text{NiBr}_2\cdot\text{dme}$  (6.2 mg, 0.02 mmol, 10 mol%), **L4** (15.4 mg, 0.03 mmol, 15 mol%), anhydrous acetone (0.5 mL), 1-bromo-4-(methylsulfonyl)benzene (47.0 mg, 0.20 mmol, 1.0 equiv), (*S*)-1-(4-(2,2-dimethyl-1,3-dioxan-4-yl)phenyl)ethan-1-one (468.6 mg, 2.0 mmol, 10.0 equiv), TBADT (33.5 mg, 0.2 mmol, 5 mol%),  $\text{K}_3\text{PO}_4$  (63.6 mg, 0.3 mmol, 1.5 equiv) and  $\text{PhCF}_3$  (0.5 mL) and was purified by silica gel column chromatography (PE/EtOAc = 3/1) to obtain **10a** as colorless oil (51.9 mg, 67% yield, d.r. = 15/1).  $R_f$  = 0.2 (PE/EA = 3/1).

$^1\text{H}$  NMR (600 MHz,  $\text{CDCl}_3$ )  $\delta$  7.93 (t,  $J$  = 8.9 Hz, 4H), 7.61 (d,  $J$  = 7.8 Hz, 2H), 7.49 (d,  $J$  = 7.8 Hz, 2H), 5.23 – 5.11 (m, 2H), 3.02 (s, 3H), 2.59 (s, 3H), 2.04 (d,  $J$  = 13.1 Hz, 1H), 1.69 (s, 3H), 1.64 (s, 3H), 1.60 (d,  $J$  = 19.9 Hz, 1H);

$^{13}\text{C}$  NMR (151 MHz,  $\text{CDCl}_3$ )  $\delta$  197.7, 148.0, 146.8, 139.7, 136.5, 128.6, 127.6, 126.7, 125.9, 99.9, 70.9, 70.8, 44.5, 40.9, 30.1, 26.6, 19.7;

HRMS: (APCI) calcd for  $\text{C}_{21}\text{H}_{25}\text{O}_5\text{S}^+[\text{M}+\text{H}]^+$  389.1417; found 389.1408.

**(4*S*,6*R*)-2,2-dimethyl-4-(4-(methylsulfonyl)phenyl)-6-phenyl-1,3-dioxane (10b)**

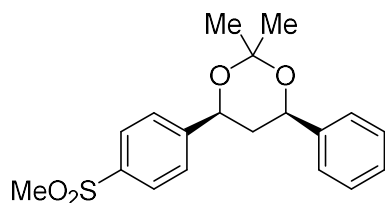

Chemical Formula: C<sub>19</sub>H<sub>22</sub>O<sub>4</sub>S

Exact Mass: 346.1239

**10b** was prepared according to general procedure **2.4** using NiBr<sub>2</sub>•dme (6.2 mg, 0.02 mmol, 10 mol%), **L6** (11.7 mg, 0.03 mmol, 15 mol%), anhydrous acetone (0.5 mL), 1-bromo-4-(methylsulfonyl)benzene (47.0 mg, 0.20 mmol, 1.0 equiv), TBADT (33.5 mg, 0.02 mmol, 5 mol%), (*R*)-2,2-dimethyl-4-phenyl-1,3-dioxane (384.2 mg, 2.0 mmol, 10.0 equiv), K<sub>3</sub>PO<sub>4</sub> (63.6 mg, 0.3 mmol, 1.5 equiv) and PhCF<sub>3</sub> (0.5 mL) and was purified by silica gel column chromatography (PE/EtOAc = 3/1) to obtain **10b** as colorless oil (38.1 mg, 55% yield, d.r. > 20/1). R<sub>f</sub> = 0.3 (PE/EA = 3/1).

<sup>1</sup>H NMR (600 MHz, CDCl<sub>3</sub>) δ 7.92 (d, *J* = 7.6 Hz, 2H), 7.61 (d, *J* = 7.7 Hz, 2H), 7.39 (d, *J* = 7.4 Hz, 2H), 7.35 (t, *J* = 7.2 Hz, 2H), 7.28 (d, *J* = 6.9 Hz, 1H), 5.17 (d, *J* = 11.6 Hz, 1H), 5.09 (d, *J* = 11.5 Hz, 1H), 3.02 (d, *J* = 2.4 Hz, 3H), 2.05 – 1.99 (m, 1H), 1.72 (d, *J* = 12.7 Hz, 1H), 1.69 (s, 3H), 1.63 (s, 3H); <sup>13</sup>C NMR (151 MHz, CDCl<sub>3</sub>) δ 148.4, 141.5, 139.6, 128.5, 127.9, 127.6, 126.7, 125.9, 99.8, 71.4, 70.9, 44.6, 41.1, 30.2, 19.8;

HRMS: (ESI) calcd for C<sub>19</sub>H<sub>22</sub>O<sub>4</sub>SNa<sup>+</sup>[M+Na]<sup>+</sup> 369.1058; found 369.1054.

#### 1-(4-((4*S*,6*R*)-2,2-dimethyl-6-phenyl-1,3-dioxan-4-yl)phenyl)ethan-1-one (**10c**)

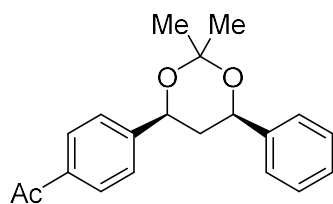

Chemical Formula: C<sub>20</sub>H<sub>22</sub>O<sub>3</sub>

Exact Mass: 310.1569

**10c** was prepared according to general procedure **2.4** using NiBr<sub>2</sub>•dme (6.2 mg, 0.02 mmol, 10 mol%), **L6** (11.7 mg, 0.03 mmol, 15 mol%), anhydrous acetone (0.5 mL), 1-(4-bromophenyl)ethan-1-one (40.0 mg, 0.20 mmol, 1.0 equiv), TBADT (33.5 mg, 0.02 mmol, 5 mol%), (*R*)-2,2-dimethyl-4-phenyl-1,3-dioxane (384.2 mg, 2.0 mmol, 10.0 equiv), K<sub>3</sub>PO<sub>4</sub> (63.6

mg, 0.3 mmol, 1.5 equiv) and PhCF<sub>3</sub> (0.5 mL) and was purified by silica gel column chromatography (PE/EtOAc = 5/1) to obtain **10c** as colorless oil (37.8 mg, 61% yield, d.r. > 20/1). R<sub>f</sub> = 0.4 (PE/EA = 10/1).

<sup>1</sup>H NMR (600 MHz, CDCl<sub>3</sub>) δ 7.94 (d, *J* = 8.3 Hz, 2H), 7.50 (d, *J* = 8.3 Hz, 2H), 7.40 (d, *J* = 7.4 Hz, 2H), 7.35 (t, *J* = 7.6 Hz, 2H), 7.28 (d, *J* = 7.3 Hz, 1H), 5.14 (dd, *J* = 11.7, 2.5 Hz, 1H), 5.09 (dd, *J* = 11.7, 2.5 Hz, 1H), 2.59 (s, 3H), 2.01 (dt, *J* = 13.2, 2.5 Hz, 1H), 1.77 – 1.71 (m, 1H), 1.69 (s, 3H), 1.64 (s, 3H); <sup>13</sup>C NMR (151 MHz, CDCl<sub>3</sub>) δ 197.8, 147.4, 141.8, 136.4, 128.6, 128.5, 127.8, 125.91, 125.88, 99.7, 71.5, 71.2, 41.1, 30.3, 26.6, 19.8.

HRMS: (APCI) calcd for C<sub>20</sub>H<sub>23</sub>O<sub>3</sub><sup>+</sup>[M+H]<sup>+</sup> 311.1642; found 311.1639.

### 1,1'-(((4*S*,6*R*)-2,2-dimethyl-1,3-dioxane-4,6-diyl)bis(4,1-phenylene))bis(ethan-1-one) (**10d**)

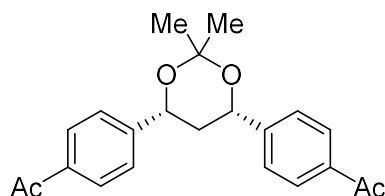

Chemical Formula: C<sub>22</sub>H<sub>24</sub>O<sub>4</sub>  
Exact Mass: 352.1675

**10d** was prepared according to general procedure **2.4** using NiBr<sub>2</sub>•dme (6.2 mg, 0.02 mmol, 10 mol%), **L4** (15.4 mg, 0.03 mmol, 15 mol%), anhydrous acetone (0.5 mL), 1-(4-bromophenyl)ethan-1-one (40.0 mg, 0.20 mmol, 1.0 equiv), (*S*)-1-(4-(2,2-dimethyl-1,3-dioxan-4-yl)phenyl)ethan-1-one (468.6 mg, 2.0 mmol, 10.0 equiv), TBADT (33.5 mg, 0.2 mmol, 5 mol%), K<sub>3</sub>PO<sub>4</sub> (63.6 mg, 0.3 mmol, 1.5 equiv) and PhCF<sub>3</sub> (0.5 mL) and was purified by silica gel column chromatography (PE/EtOAc = 3/1) to obtain **10d** as colorless oil (51.4 mg, 73% yield, d.r. = 15/1). R<sub>f</sub> = 0.4 (PE/EA = 3/1).

<sup>1</sup>H NMR (600 MHz, CDCl<sub>3</sub>) δ 7.94 (d, *J* = 7.3 Hz, 4H), 7.49 (d, *J* = 7.4 Hz, 4H), 5.15 (d, *J* = 11.4 Hz, 2H), 2.59 (s, 6H), 2.03 (d, *J* = 13.4 Hz, 1H), 1.69 (s, 3H), 1.68 (s, 1H), 1.65 (s, 3H); <sup>13</sup>C NMR (151 MHz, CDCl<sub>3</sub>) δ 197.8, 147.1, 136.5, 128.6, 125.9, 99.8, 71.0, 40.9, 30.2, 26.6, 19.7;

HRMS: (ESI) calcd for C<sub>22</sub>H<sub>25</sub>O<sub>4</sub><sup>+</sup>[M+H]<sup>+</sup> 353.1747; found 353.1737.

### *tert*-butyl 2-((4*R*,6*S*)-6-(4-acetylphenyl)-2,2-dimethyl-1,3-dioxan-4-yl)acetate (**10e**)

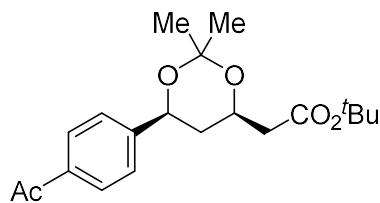

Chemical Formula: C<sub>20</sub>H<sub>28</sub>O<sub>5</sub>  
Exact Mass: 348.1937

**10e** was prepared according to general procedure **2.4** using NiBr<sub>2</sub>•dme (6.2 mg, 0.02 mmol, 10 mol%), **L6** (11.7 mg, 0.03 mmol, 15 mol%), anhydrous acetone (0.5 mL), 1-(4-bromophenyl)ethan-1-one (40.0 mg, 0.20 mmol, 1 equiv), TBADT (33.5 mg, 0.02 mmol, 5 mol%), *tert*-butyl (*R*)-2-(2,2-dimethyl-1,3-dioxan-4-yl)acetate (460.6 mg, 2.0 mmol, 10 equiv), K<sub>3</sub>PO<sub>4</sub> (63.6 mg, 0.3 mmol, 1.5 equiv) and PhCF<sub>3</sub> (0.5 mL) and was purified by silica gel column chromatography (PE/EtOAc = 6/1) to obtain **10e** as colorless oil (36.2 mg, 52% yield, d.r. > 20:1). R<sub>f</sub> = 0.6 (PE/EA = 5/1).

<sup>1</sup>H NMR (400 MHz, CDCl<sub>3</sub>) δ 7.96 – 7.91 (m, 2H), 7.48 – 7.43 (m, 2H), 4.99 (dd, *J* = 11.7, 2.7 Hz, 1H), 4.43 (dtd, *J* = 11.6, 6.6, 2.4 Hz, 1H), 2.59 (s, 3H), 2.48 (dd, *J* = 15.3, 7.0 Hz, 1H), 2.33 (dd, *J* = 15.3, 6.2 Hz, 1H), 1.84 (dt, *J* = 12.9, 2.5 Hz, 1H), 1.57 (s, 3H), 1.49 (s, 3H), 1.45 (s, 10H), 1.39 – 1.27 (m, 1H); <sup>13</sup>C NMR (151 MHz, CDCl<sub>3</sub>) δ 197.8, 170.1, 147.5, 136.4, 128.6, 126.0, 99.3, 80.8, 71.0, 66.3, 42.5, 38.6, 30.1, 28.1, 26.7, 19.7.

HRMS: (ESI) calcd for C<sub>20</sub>H<sub>28</sub>O<sub>5</sub>Na<sup>+</sup>[M+Na]<sup>+</sup> 372.1863; found 372.1855.

#### 1-(4-((4*R*,6*R*)-2,2,6-trimethyl-1,3-dioxan-4-yl)phenyl)ethan-1-one (**10f**)

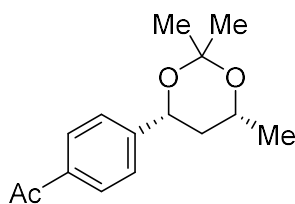

Chemical Formula: C<sub>15</sub>H<sub>20</sub>O<sub>3</sub>  
Exact Mass: 248.1412

**10f** was prepared according to general procedure **2.2** using NiBr<sub>2</sub>•dme (6.2 mg, 0.02 mmol, 10 mol%), **L4** (15.4 mg, 0.03 mmol, 15 mol%), anhydrous acetone (0.5 mL), 1-(4-bromophenyl)ethan-1-one (40.0 mg, 0.20 mmol, 1 equiv), TBADT (33.5 mg, 0.02 mmol, 5 mol%), (*R*)-2,2,4-trimethyl-1,3-dioxane (260.4 mg, 2.0 mmol, 10 equiv), K<sub>3</sub>PO<sub>4</sub> (63.6 mg, 0.3

mmol, 1.5 equiv) and PhCF<sub>3</sub> (0.5 mL) and was purified by silica gel column chromatography (PE/EtOAc = 10/1) to obtain **10f** as colorless oil (34.7 mg, 70% yield, d.r. = 15/1). R<sub>f</sub> = 0.4 (PE/EA = 10/1).

<sup>1</sup>H NMR (600 MHz, CDCl<sub>3</sub>) δ 7.96 – 7.91 (m, 2H), 7.48 – 7.43 (m, 2H), 4.96 (dd, *J* = 11.8, 2.7 Hz, 1H), 4.15 (dq, *J* = 12.2, 6.1, 2.3 Hz, 1H), 2.58 (s, 3H), 1.75 (dt, *J* = 13.1, 2.6 Hz, 1H), 1.56 (s, 3H), 1.52 (s, 3H), 1.39 (dt, *J* = 13.1, 11.6 Hz, 1H), 1.21 (d, *J* = 6.1 Hz, 3H); <sup>13</sup>C NMR (151 MHz, CDCl<sub>3</sub>) δ 197.9, 147.8, 136.3, 128.6, 125.9, 99.1, 71.1, 65.2, 40.8, 30.3, 26.7, 22.1, 19.8. HRMS: (ACPI) calcd for C<sub>15</sub>H<sub>21</sub>O<sub>3</sub><sup>+</sup>[M+H]<sup>+</sup> 249.1485; found 249.1479.

**methyl (4*S*,6*R*)-6-(4-acetylphenyl)-2,2-dimethyl-1,3-dioxane-4-carboxylate (10g)**

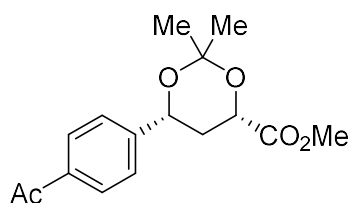

Chemical Formula: C<sub>16</sub>H<sub>20</sub>O<sub>5</sub>  
Exact Mass: 292.1311

**10g** was prepared according to general procedure **2.2** using NiBr<sub>2</sub>•dme (6.2 mg, 0.02 mmol, 10 mol%), **L4** (15.4 mg, 0.03 mmol, 15 mol%), anhydrous acetone (0.5 mL), 1-(4-bromophenyl)ethan-1-one (40.0 mg, 0.20 mmol, 1 equiv), TBADT (33.5 mg, 0.02 mmol, 5 mol%), methyl (*S*)-2,2-dimethyl-1,3-dioxane-4-carboxylate (348.4 mg, 2.0 mmol, 10 equiv), K<sub>3</sub>PO<sub>4</sub> (63.6 mg, 0.3 mmol, 1.5 equiv) and PhCF<sub>3</sub> (0.5 mL) and was purified by silica gel column chromatography (PE/EtOAc = 5/1) to obtain **10g** as colorless oil (37.4 mg, 64% yield, d.r. = 12/1). R<sub>f</sub> = 0.3 (PE/EA = 5/1).

<sup>1</sup>H NMR (400 MHz, CDCl<sub>3</sub>) δ 8.01 – 7.80 (m, 2H), 7.45 (d, *J* = 8.1 Hz, 2H), 5.03 (dd, *J* = 11.7, 2.7 Hz, 1H), 4.68 (dd, *J* = 12.2, 2.7 Hz, 1H), 3.76 (s, 3H), 2.58 (s, 3H), 2.11 (dt, *J* = 13.1, 2.7 Hz, 1H), 1.74 (q, *J* = 12.1 Hz, 1H), 1.61 (s, 3H), 1.59 (s, 3H); <sup>13</sup>C NMR (151 MHz, CDCl<sub>3</sub>) δ 197.8, 170.9, 146.6, 136.6, 128.6, 126.0, 100.0, 70.7, 68.9, 52.4, 35.5, 29.9, 26.7, 19.4.

HRMS: (APCI) calcd for C<sub>16</sub>H<sub>21</sub>O<sub>5</sub><sup>+</sup>[M+H]<sup>+</sup> 293.1383; found 293.1376.

## 5. Mechanistic studies

### 5.1 Reaction of aryl-Ni(II) complex **11**

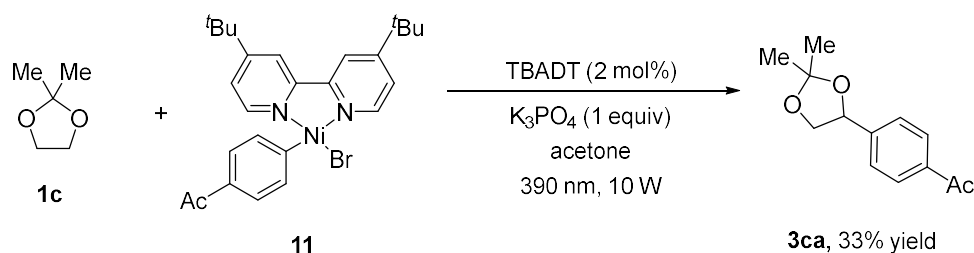

An oven-dried 10-mL vial equipped with a PTFE-coated stir bar was charged with complex **11** (26.3 mg, 0.05 mmol, 1 equiv), 2,2-dimethyl-1,3-dioxolane **1c** (25.5 mg, 0.25 mmol, 5 equiv), TBADT (3.4 mg, 0.001 mmol, 2 mol%), K<sub>3</sub>PO<sub>4</sub> (10.6 mg, 0.05 mmol, 1 equiv) and anhydrous acetone (0.5 mL). The sealed tube was sealed and removed from the glovebox. The reaction mixture was stirred and irradiated using a 10 W 390 nm LED lamp at 25 °C. The resulting mixture was concentrated under vacuum and the residue was purified by column chromatography on silica gel, eluting with PE/EA (10/1) to afford the corresponding product **3ca** (3.6 mg, 33% yield).

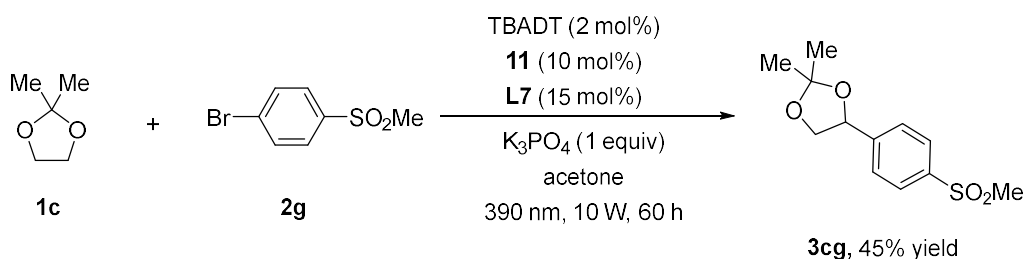

An oven-dried 10-mL vial equipped with a PTFE-coated stir bar was charged with complex **11** (5.6 mg, 0.01 mmol, 10 mol%), **L7** (4.0 mg, 0.015 mmol, 15 mol%), TBADT (6.8 mg, 0.002 mmol, 2 mol%), 2,2-dimethyl-1,3-dioxolane **1c** (51.0 mg, 0.50 mmol, 5 equiv), 1-bromo-4-(methylsulfonyl)benzene **2g** (23.5 mg, 0.10 mmol, 1.0 equiv), K<sub>3</sub>PO<sub>4</sub> (21.2 mg, 0.10 mmol, 1 equiv) and anhydrous acetone (1.0 mL). The sealed tube was sealed and removed from the glovebox. The reaction mixture was stirred and irradiated using a 10 W 390 nm LED lamp at 25 °C. The resulting mixture was concentrated under vacuum and the residue was purified by column chromatography on silica gel, eluting with PE/EA (5/1) to afford the corresponding product **3cg** (11.5 mg, 45% yield).

## 5.2 Reaction of $\sigma$ -alkyl-Ni(II) complex **12**

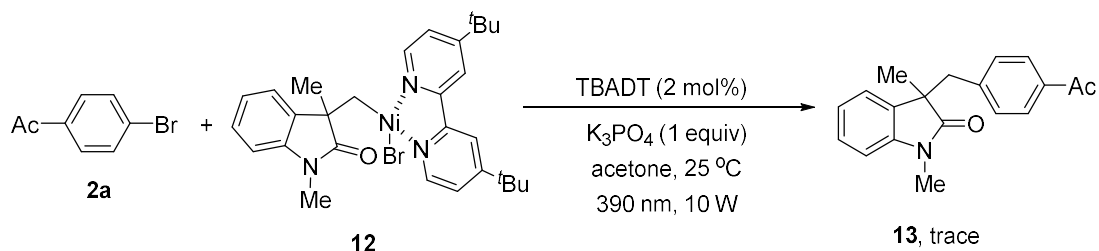

An oven-dried 10-mL vial equipped with a PTFE-coated stir bar was charged with complex **12** (29.1 mg, 0.05 mmol, 1 equiv), 1-(4-bromophenyl)ethan-1-one **2a** (10.0 mg, 0.05 mmol, 1 equiv), TBADT (3.4 mg, 0.001 mmol, 2 mol%), K<sub>3</sub>PO<sub>4</sub> (10.6 mg, 0.05 mmol, 1 equiv) and anhydrous acetone (0.5 mL). The sealed tube was sealed and removed from the glovebox. The reaction mixture was stirred and irradiated using a 10 W 390 nm LED lamp at 25 °C. The resulting mixture was concentrated under vacuum and the residue was purified by column chromatography on silica gel, eluting with PE/EA (4/1) to afford trace product **13**.

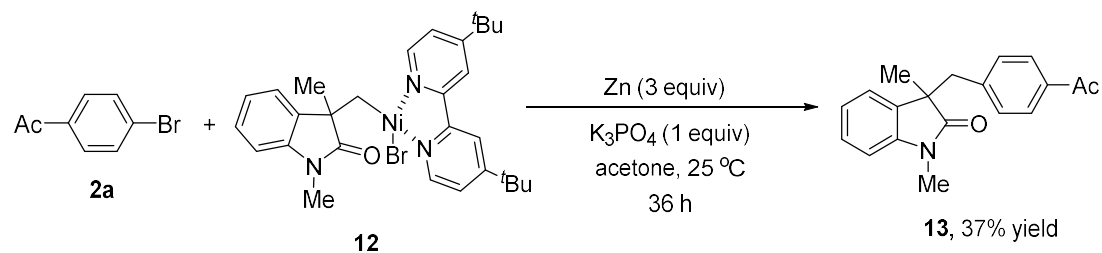

An oven-dried 10-mL vial equipped with a PTFE-coated stir bar was charged with complex **12** (29.1 mg, 0.05 mmol, 1 equiv), 1-(4-bromophenyl)ethan-1-one **2a** (10.0 mg, 0.05 mmol, 1 equiv), Zn (9.8 mg, 0.15 mmol, 3 equiv) K<sub>3</sub>PO<sub>4</sub> (10.6 mg, 0.05 mmol, 1 equiv) and anhydrous acetone (0.5 mL). The sealed tube was sealed and removed from the glovebox. Then the reaction was stirred at 25 °C in an aluminium bead bath for 12 hours. The resulting mixture was concentrated under vacuum and the residue was purified by column chromatography on silica gel, eluting with PE/EA (4/1) to afford the corresponding product **13** (5.4 mg, 37% yield).

The NMR data matched those reported in the literature.<sup>8</sup>

<sup>1</sup>H NMR (600 MHz, CDCl<sub>3</sub>)  $\delta$  7.66 – 7.61 (m, 2H), 7.18 (q,  $J$  = 7.4, 6.9 Hz, 2H), 7.05 (t,  $J$  = 7.6 Hz, 1H), 6.93 (dd,  $J$  = 8.4, 2.9 Hz, 2H), 6.61 (d,  $J$  = 7.7 Hz, 1H), 3.20 (d,  $J$  = 12.9 Hz, 1H), 3.06 (d,  $J$  = 12.9 Hz, 1H), 2.98 (s, 3H), 2.50 (s, 3H), 1.49 (s, 3H).



$^{13}\text{C}$  NMR (151 MHz,  $\text{CDCl}_3$ )  $\delta$  198.0, 179.5, 143.0, 142.0, 135.4, 132.5, 130.0, 128.0, 127.6, 123.1, 122.3, 108.0, 49.9, 44.3, 26.5, 25.9, 23.1.

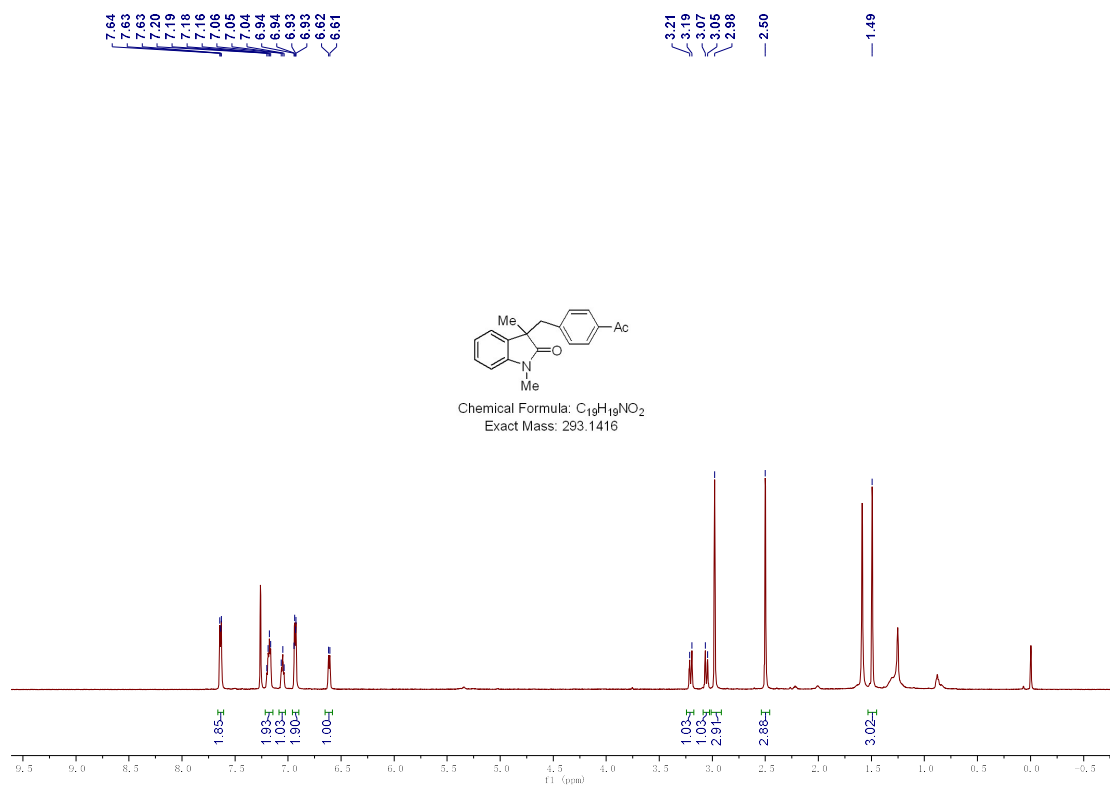

Supplementary Figure 83.  $^1\text{H}$  NMR Spectrum of 13

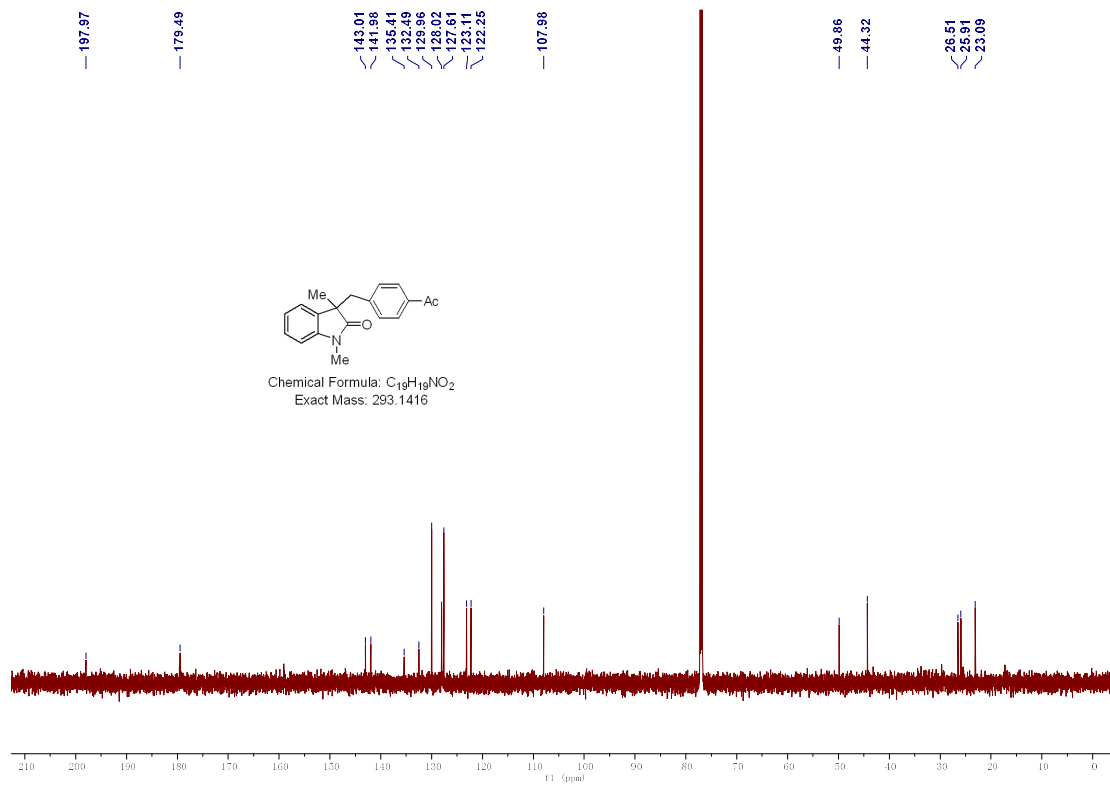

Supplementary Figure 84.  $^{13}C$  NMR Spectrum of 13

### 5.3 Kinetic isotope effect (KIE) from an intermolecular competition experiment

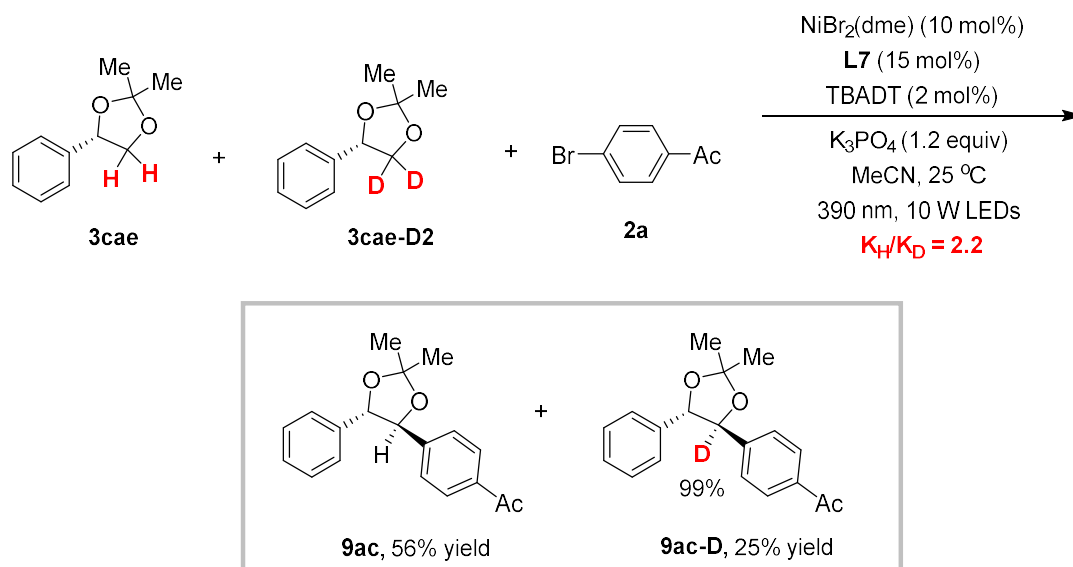

An oven-dried 10-mL vial equipped with a PTFE-coated stir bar was charged with  $\text{NiBr}_2(\text{dme})$  (3.1 mg, 0.01 mmol, 10 mol%), **L7** (4.0 mg, 0.015 mmol, 15 mol%), TBADT (6.8 mg, 0.002 mmol, 2 mol%), **2a** (19.9 mg, 0.10 mmol, 1.0 equiv), **3cae** (89.0 mg, 0.50 mmol, 5.0 equiv), **3cae-D2** (90.0 mg, 0.50 mmol, 5.0 equiv),  $\text{K}_3\text{PO}_4$  (25.2 mg, 0.12 mmol, 1.2 equiv) and anhydrous MeCN (1 mL). The reaction mixture was stirred and irradiated with a 10 W 390 nm LED lamp at 25 °C. The resulting mixture was removed from light, diluted with ethyl acetate and passed through a pad of celite. The celite plug was further washed with ethyl acetate. The combined solvent was then evaporated under reduced pressure, and the residue was purified by column chromatography on silica gel, eluting with PE/EA (5/1) to afford **9ac** (56% yield) and **9ac-D** (25% yield).

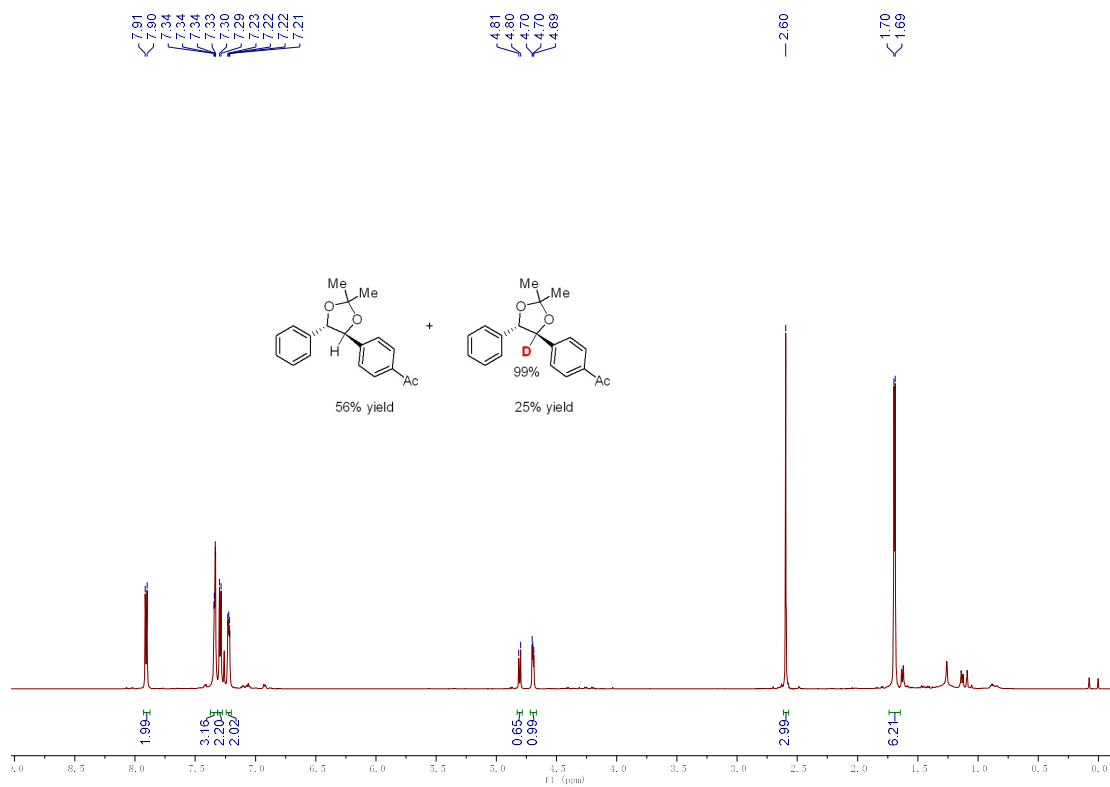

Supplementary Figure 85. <sup>1</sup>H NMR Spectrum of 9ac and 9ac-D

#### 5.4 Kinetic isotope effect (KIE) from two parallel reactions

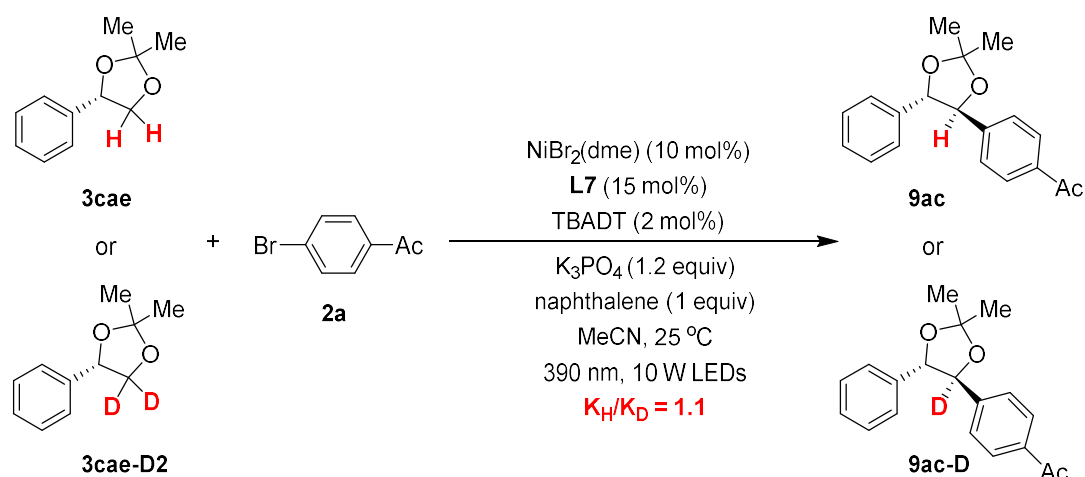

Two oven-dried 10-mL vials equipped with a PTFE-coated stir bar was charged with  $\text{NiBr}_2(\text{dme})$  (3.1 mg, 0.01 mmol, 10 mol%), **L7** (4.0 mg, 0.015 mmol, 15 mol%), TBADT (6.8 mg, 0.002 mmol, 2 mol%), **3cae** or **3cae-D2** (90.0 mg, 0.50 mmol, 5.0 equiv), **2a** (19.9 mg, 0.10 mmol, 1.0 equiv), anhydrous  $\text{K}_3\text{PO}_4$  (25.2 mg, 0.12 mmol, 1.2 equiv) and dry MeCN (1.0 mL) in an argon-filled glovebox. The vial was sealed and removed from the glovebox. The reaction mixture was stirred and irradiated using a 10 W 390 nm LED lamp at 25 °C. The reactions were stirred under irradiation for the time stated for each experiment. The kinetic isotope effect (KIE) was determined to be 1.1. The reaction uses naphthalene as an internal standard.

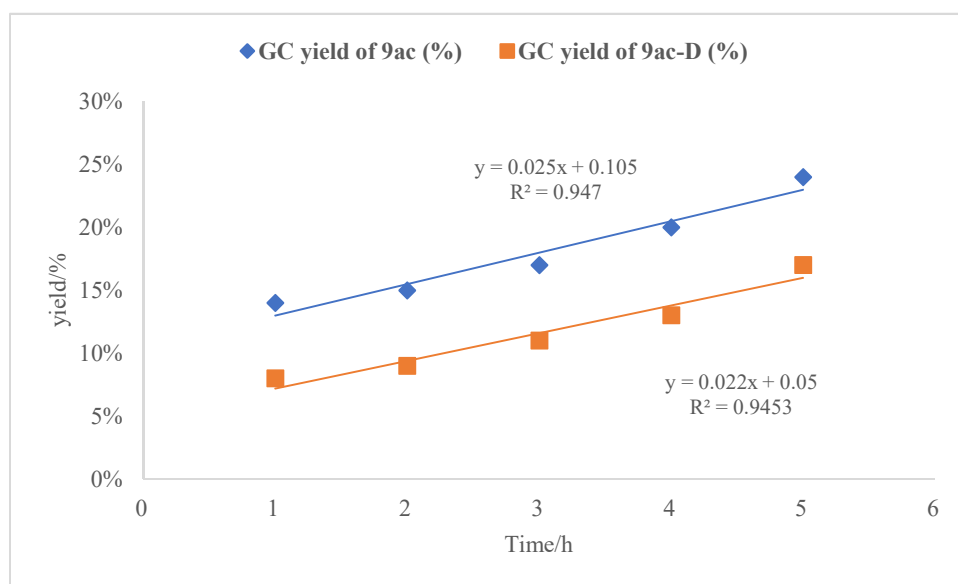

**Supplementary Figure 86.** Curve of Kinetic isotope effect from two parallel reactions

## 5.5 Intramolecular competition experiment of 3ck-D

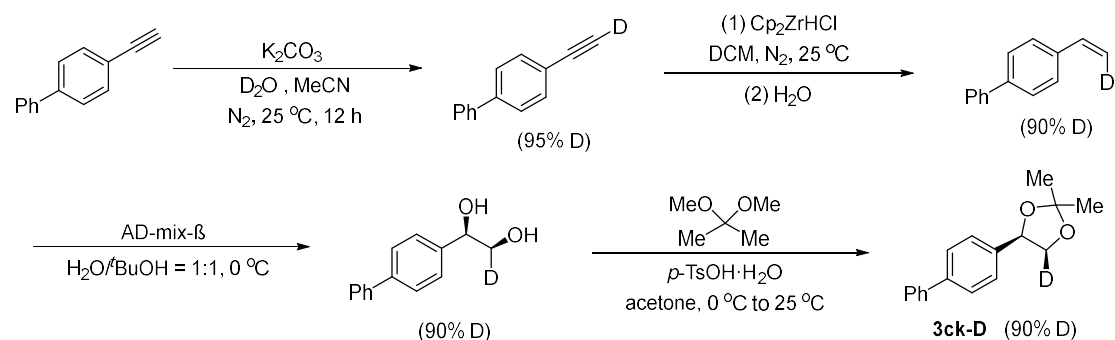

An oven-dried 100 mL Schlenk flask was charged with 4-ethynyl-1,1'-biphenyl (1.78 g, 10 mmol),  $\text{K}_3\text{PO}_4$  (2.0 g, 1.5 equiv) and anhydrous MeCN (10 mL). The reaction mixture was stirred under  $\text{N}_2$  atmosphere for 30 minutes.  $\text{D}_2\text{O}$  (10.0 mL, 50 equiv) was then added and the resulting mixture was stirring at  $25\text{ }^\circ\text{C}$  for overnight. The reaction mixture was diluted with DCM. The organic layer was dried over  $\text{Na}_2\text{SO}_4$ , filtered and solvent was removed under reduced pressure to afford the 4-(ethynyl-*d*)-1,1'-biphenyl (1.77 g, 99% yield, 95% D).

An oven-dried 100 mL Schlenk flask was charged with 4-(ethynyl-*d*)-1,1'-biphenyl (0.896 g, 5 mmol),  $\text{Cp}_2\text{ZrHCl}$  (Schwartz' reagent) (1.42 g, 5.5 mmol, 1.1 equiv) and anhydrous DCM (10 mL). After stirring at room temperature in the dark for 2 h, water (0.71 mL, 40 mmol, 8 equiv) was added and the reaction was stirred for overnight. The reaction was diluted with DCM and the organic layer was washed with brine, dried over  $\text{Na}_2\text{SO}_4$ , filtered, and solvent was removed under reduced pressure. The residue was purified by flash chromatography on silica gel (PE) to afford (Z)-4-(vinyl-2-*d*)-1,1'-biphenyl (815.6 mg, 90% yield, 90% D).

A round-bottomed flask was charged with tert-butyl alcohol (20 mL),  $\text{H}_2\text{O}$  (20 mL) and AD-mix- $\beta$  (5.6 g). The mixture was stirred at room temperature until the aqueous phase appears bright yellow. The mixture was cooled to  $0\text{ }^\circ\text{C}$  whereupon some of the dissolved salts precipitated, (Z)-4-(vinyl-2-*d*)-1,1'-biphenyl (815.6 mg, 4.5 mmol) was added once, and the heterogenous slurry was stirred vigorously at  $0\text{ }^\circ\text{C}$  for 24 h. While the mixture was stirred at  $0\text{ }^\circ\text{C}$ , anhydrous sodium sulfite was added and the mixture was allowed to warm to  $25\text{ }^\circ\text{C}$  and further stirred for 30 minutes. The reaction mixture was extracted with EA. The organic phase was washed with brine, dried over anhydrous  $\text{Na}_2\text{SO}_4$  and concentrated. The residue was

purified by flash chromatography on silica gel (PE/EA) to afford (1*R*,2*S*)-1-([1,1'-biphenyl]-4-yl)ethane-2-*d*-1,2-diol (238.8 mg, 40% yield, 90% D).

To a solution of (1*R*,2*S*)-1-([1,1'-biphenyl]-4-yl)ethane-2-*d*-1,2-diol (89.7 mg, 0.42 mmol) in acetone (5 mL) was added PTSA·H<sub>2</sub>O (8.0 mg, 0.042 mmol, 10 mol%). The reaction mixture was cooled to 0 °C and added 2,2-dimethoxypropane (0.14 mL, 1.05 equiv, 0.44 mmol). The reaction mixture was stirred at room temperature for 16 h. The reaction was quenched by adding saturated NaHCO<sub>3</sub> solution (2 mL). The reaction mixture was extracted with DCM. The organic phase was washed with brine, dried over anhydrous Na<sub>2</sub>SO<sub>4</sub> and concentrated. The residue was purified by flash chromatography on silica gel (PE/EA) to afford **3ck-D** (86.2 mg, 81% yield, 90% D).

<sup>1</sup>H NMR (600 MHz, CDCl<sub>3</sub>) δ 7.61 – 7.56 (m, 4H), 7.44 (t, *J* = 7.4 Hz, 4H), 7.35 (t, *J* = 7.4 Hz, 1H), 5.12 (d, *J* = 6.2 Hz, 1H), 4.32 (d, *J* = 6.2 Hz, 1H), 1.58 (s, 3H), 1.51 (s, 3H).

<sup>13</sup>C NMR (151 MHz, CDCl<sub>3</sub>) δ 141.1, 140.8, 138.1, 128.8, 127.4, 127.3, 127.1, 126.7, 109.8, 77.7, 71.3 (t, *J* = 24.2 Hz), 26.7, 26.0.

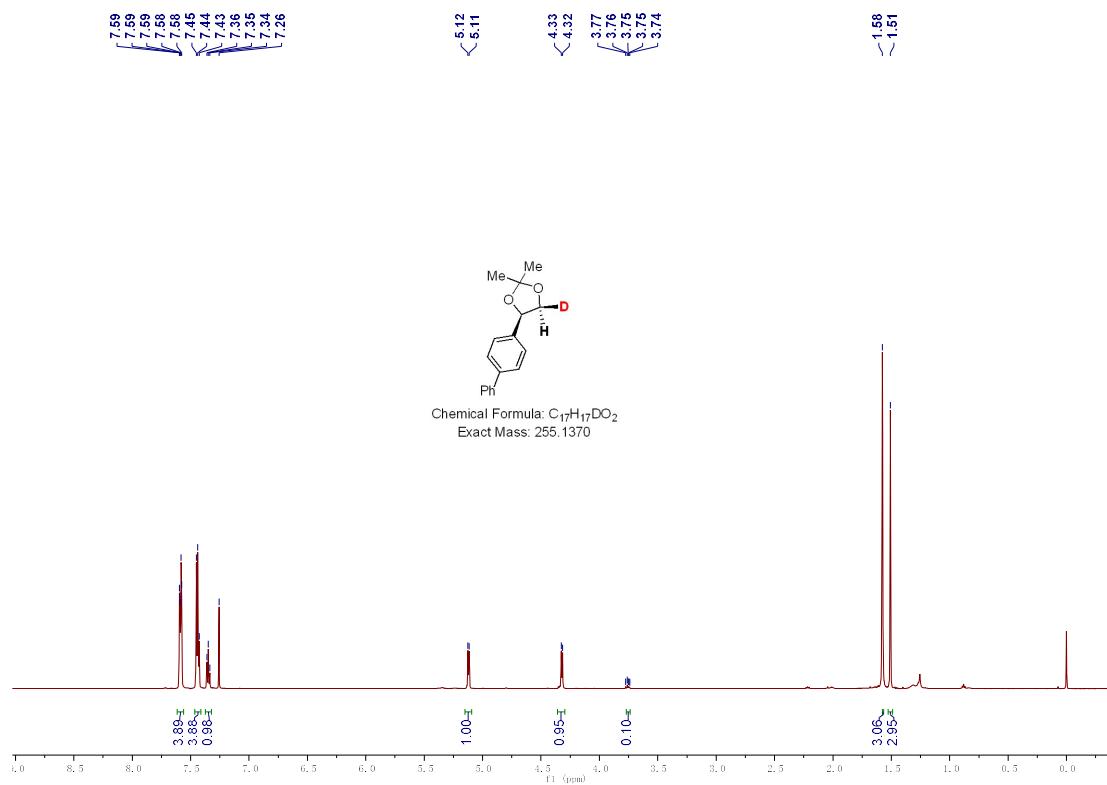

Supplementary Figure 87. <sup>1</sup>H NMR Spectrum of **3ck-D**

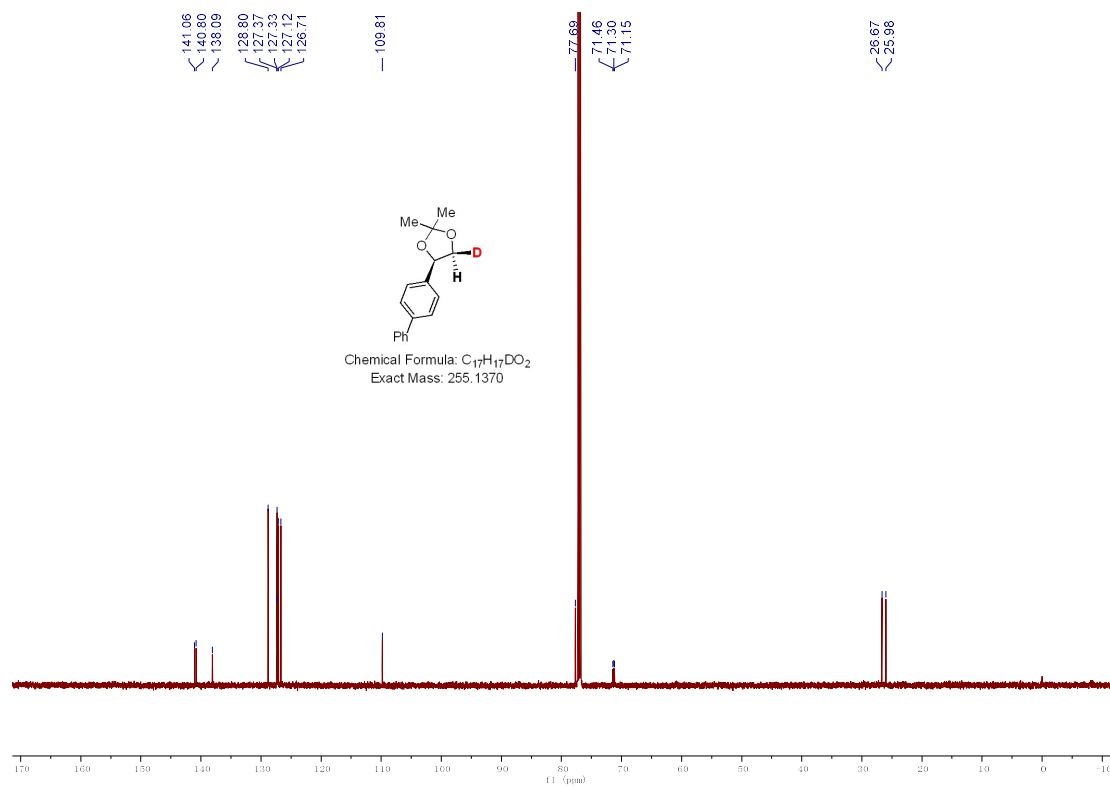

Supplementary Figure 88. <sup>13</sup>C NMR Spectrum of 3ck-D

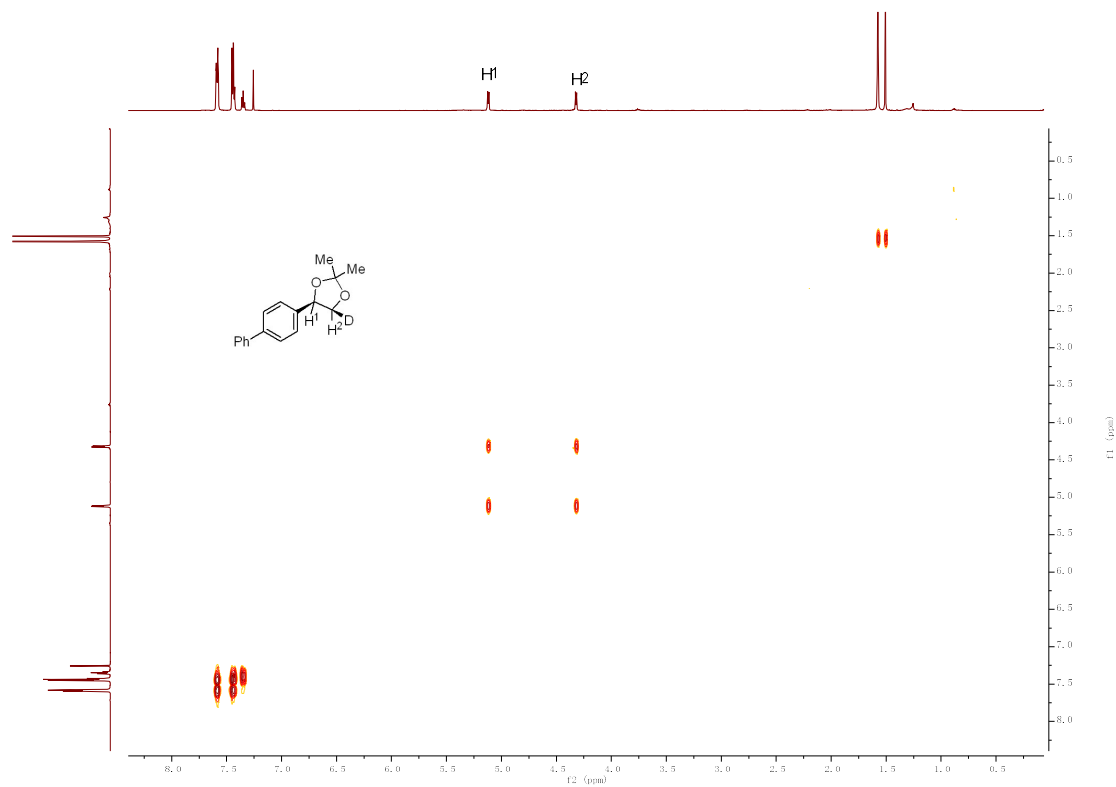

Supplementary Figure 89. H-H COSY Spectrum of 3ck-D



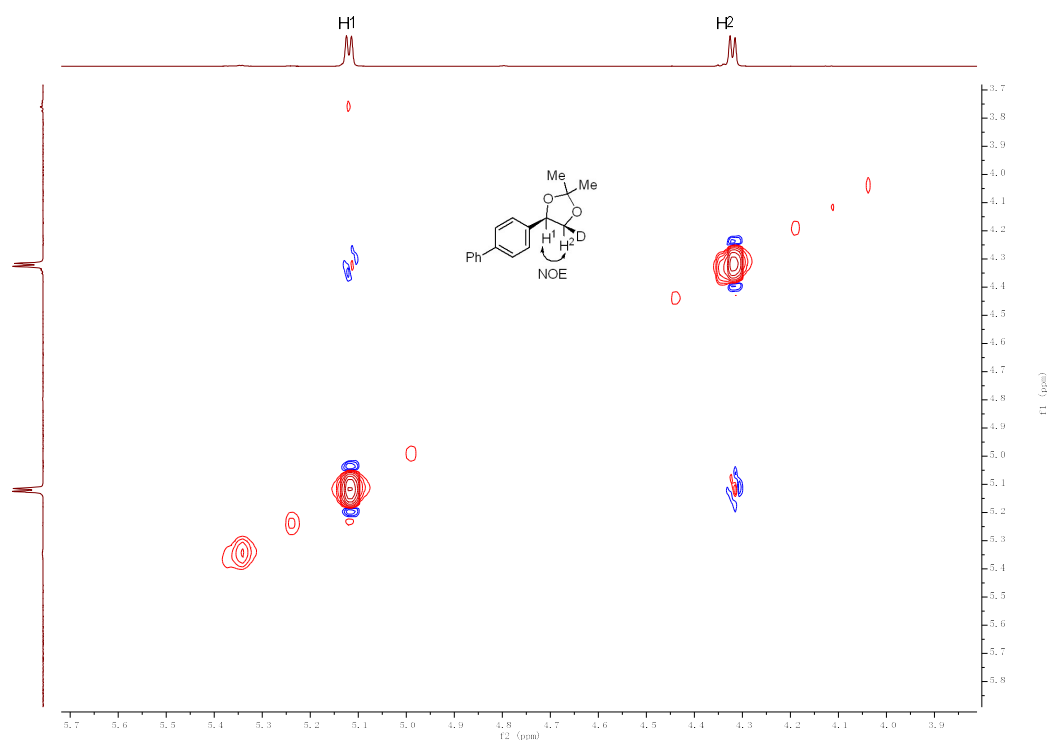

**Supplementary Figure 90. H-H NOESY Spectrum of 3ck-D**

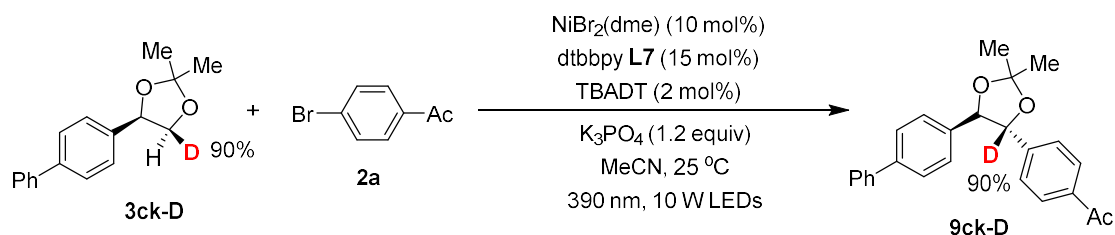

An oven-dried 10-mL vial equipped with a PTFE-coated stir bar was charged with  $\text{NiBr}_2(\text{dme})$  (1.6 mg, 0.005 mmol, 10 mol%), **L7** (2.0 mg, 0.0075 mmol, 15 mol%), TBADT (3.4 mg, 0.001 mmol, 2 mol%), **2a** (10.0 mg, 0.05 mmol, 1.0 equiv), **3ck-D** (63.7 mg, 0.25 mmol, 5.0 equiv),  $\text{K}_3\text{PO}_4$  (12.7 mg, 0.06 mmol, 1.2 equiv) and anhydrous MeCN (0.5 mL). The reaction mixture was stirred and irradiated with a 10 W 390 nm LED lamp at 25 °C. The resulting mixture was removed from light, diluted with ethyl acetate and passed through a pad of celite. The celite plug was further washed with ethyl acetate. The combined solvent was then evaporated under reduced pressure, and the residue was purified by column chromatography on silica gel, eluting with PE/EA (5/1) to afford **9ck-D** (12.1 mg, 65% yield, > 20:1 d.r.).

$^1\text{H}$  NMR (400 MHz,  $\text{CDCl}_3$ )  $\delta$  7.97 – 7.90 (m, 2H), 7.65 – 7.54 (m, 4H), 7.48 – 7.41 (m, 2H), 7.39 – 7.32 (m, 3H), 7.30 (d,  $J = 8.2$  Hz, 2H), 4.76 (d,  $J = 3.5$  Hz, 1H), 2.61 (s, 3H), 1.72 (s, 3H), 1.71 (s, 3H).

$^{13}\text{C}$  NMR (151 MHz,  $\text{CDCl}_3$ )  $\delta$  197.7, 142.2, 141.4, 140.5, 137.0, 135.2, 128.8, 128.5, 127.4, 127.23, 127.2, 127.0, 126.7, 109.8, 85.1, 84.6 – 84.0 (m), 27.2, 27.0, 26.6.

$^2\text{H}$  NMR (92 MHz,  $\text{CDCl}_3$ )  $\delta$  4.79 (s, 1H).

HRMS: (APCI) calcd for  $\text{C}_{25}\text{H}_{24}\text{DO}_3^+[\text{M}+\text{H}]^+$  374.1861; found 374.1858.

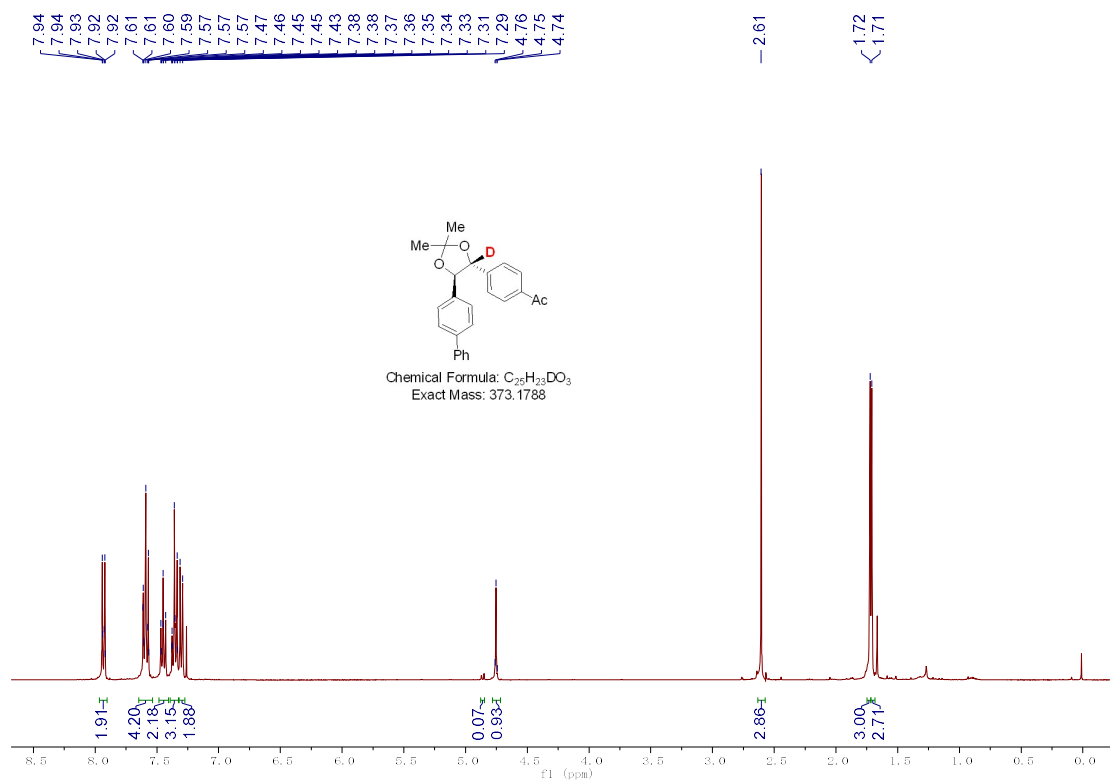

Supplementary Figure 91.  $^1H$  NMR Spectrum of 9ck-D

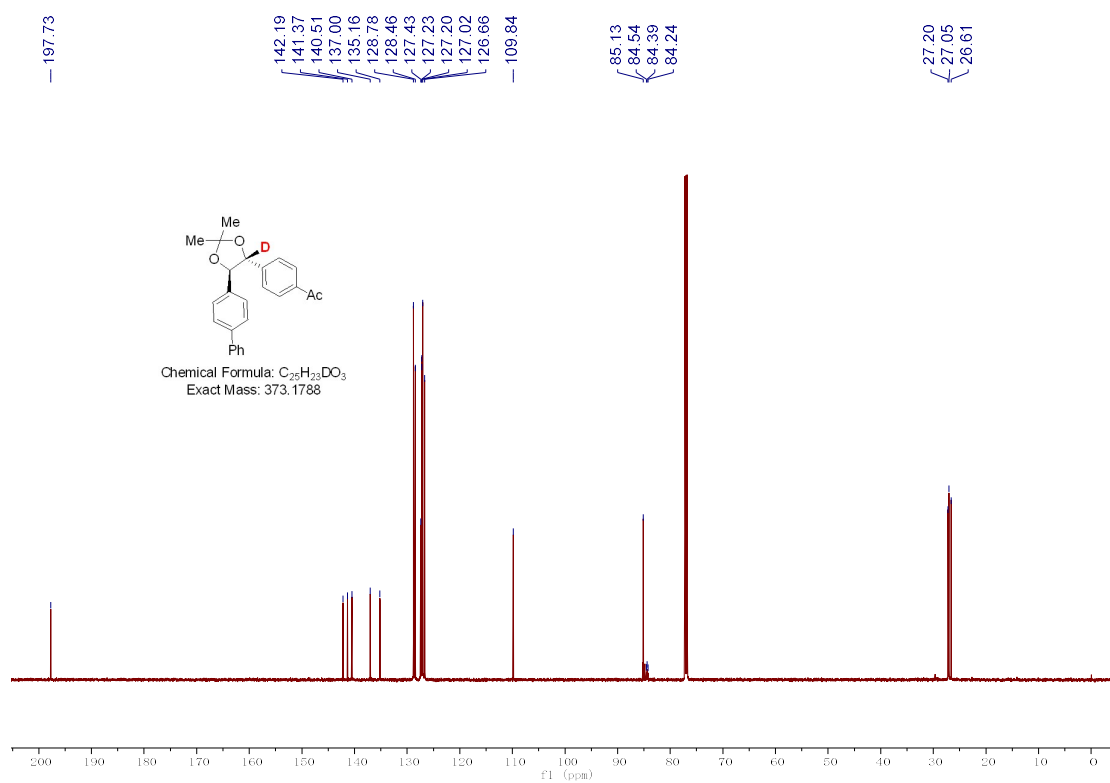

Supplementary Figure 92.  $^{13}C$  NMR Spectrum of 9ck-D

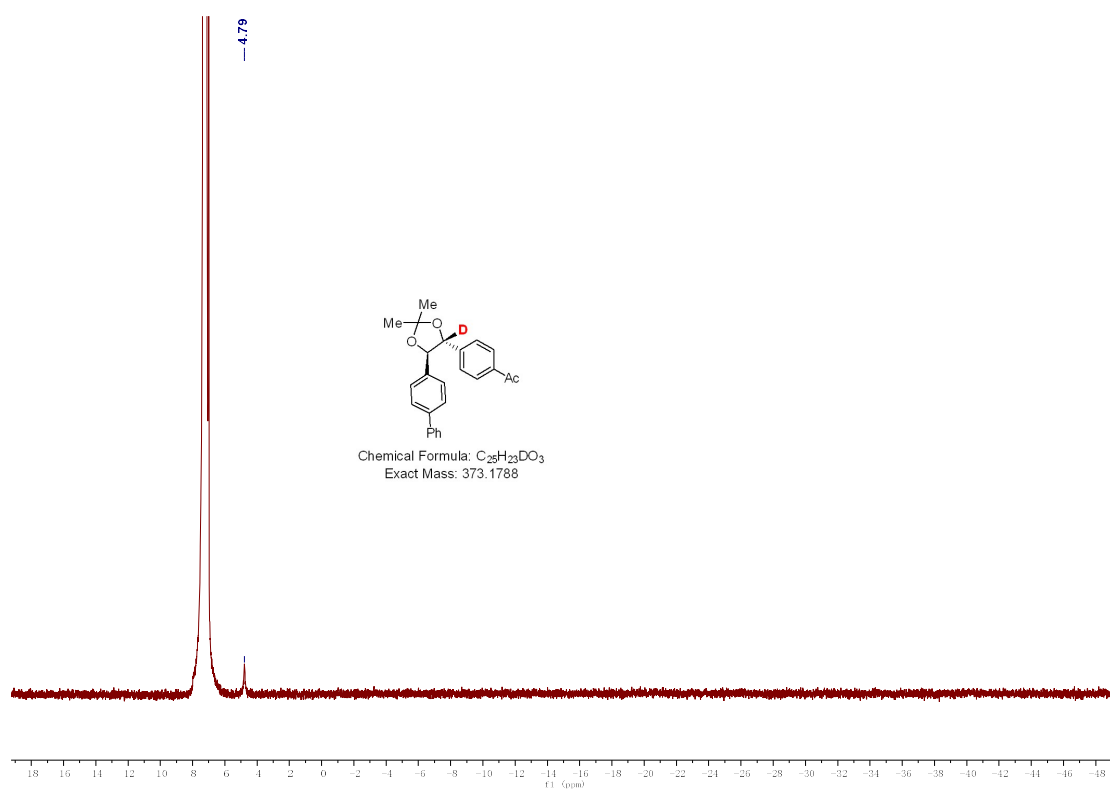

Supplementary Figure 93.  $^2H$  NMR Spectrum of 9ck-D

## 5.6 Cyclic voltammetry experiments

General information: Cyclic voltammetry (CV) experiments were conducted in a 20 mL two-necked cell set-up fitted with a glassy carbon working electrode (3 mm in diameter), an Ag/AgCl reference electrode, and a platinum wire counter electrode. All measurements were carried out in anhydrous MeCN, using a scan rate of 100 mV/s. Blank line:  $n\text{Bu}_4\text{NBF}_4$  (0.10 mmol) in 6.0 mL MeCN. Red line:  $\text{NiBr}_2(\text{dme})$  (0.01 mmol),  $n\text{Bu}_4\text{NBF}_4$  (0.10 mmol) in 6.0 mL MeCN. Blue line:  $\text{L6NiBr}_2$  (0.01 mmol),  $n\text{Bu}_4\text{NBF}_4$  (0.10 mmol) in 6.0 mL MeCN. Green line:  $\text{L6}$  (0.01 mmol),  $n\text{Bu}_4\text{NBF}_4$  (0.10 mmol) in 6.0 mL MeCN. Purple line:  $\text{TBADT}$  (0.01 mmol),  $n\text{Bu}_4\text{NBF}_4$  (0.10 mmol) in 6.0 mL MeCN. As shown in cyclic voltammetry studies, two reductive peaks of  $\text{L6NiBr}_2$  were observed at  $\text{Ni}^{\text{II}}/\text{Ni}^{\text{I}} = -0.84 \text{ V}$  (vs  $\text{Ag}/\text{Ag}^+$ ) and  $\text{Ni}^{\text{I}}/\text{Ni}^0 = -2.01 \text{ V}$  (vs  $\text{Ag}/\text{Ag}^+$ ). Two reductive peaks of  $\text{TBADT}$  were observed at  $[\text{W}_{10}\text{O}_{32}]^{4-}/[\text{W}_{10}\text{O}_{32}]^{5-} = -1.51 \text{ V}$  (vs  $\text{Ag}/\text{Ag}^+$ ) and  $[\text{W}_{10}\text{O}_{32}]^{5-}/[\text{W}_{10}\text{O}_{32}]^{6-} = -2.64 \text{ V}$  (vs  $\text{Ag}/\text{Ag}^+$ ).

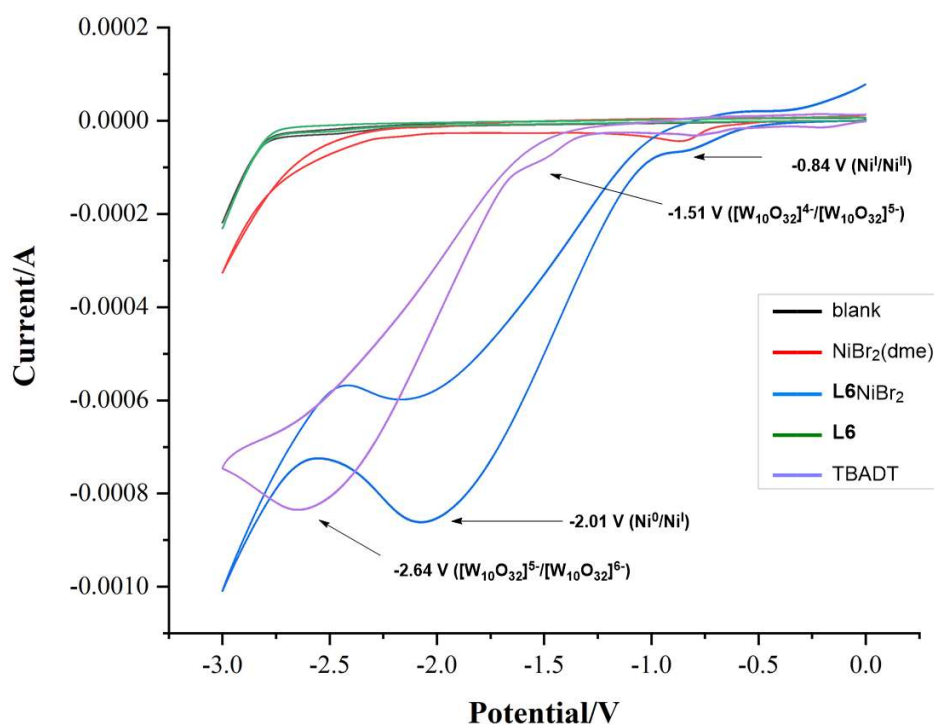

Supplementary Figure 94. Cyclic voltammetry experiments

## 6. Synthetic Applications

### 6.1 Synthesis of the (*R*)-1-(3,5-bis(trifluoromethyl)phenyl)ethane-1,2-diol (**14**)

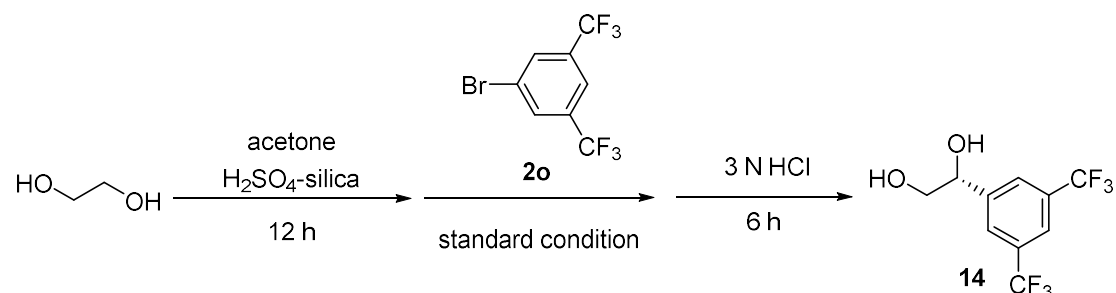

An oven-dried 10 mL tube equipped with a PTFE-coated stir bar was charged with ethane-1,2-diol (62.0 mg, 1.0 mmol, 5.0 equiv), anhydrous acetone (0.5 mL) was stirred in the presence of H<sub>2</sub>SO<sub>4</sub>-silica<sup>9</sup> at room temperature in an argon-filled glovebox. The tube was sealed and stirred at room temperature for 12 hours. The reaction then proceeds with the addition of powdered CaCl<sub>2</sub> (22.0 mg, 0.2 mmol, 1.0 equiv). Subsequently, the tube was charged with NiBr<sub>2</sub>•dme (6.4 mg, 0.02 mmol, 10 mol%), **L6** (11.7 mg, 0.03 mmol, 15 mol%), TBADT (24.6 mg, 0.01 mmol, 5 mol%), K<sub>3</sub>PO<sub>4</sub> (84.8 mg, 0.40 mmol, 2.0 equiv), 1-bromo-3,5-bis(trifluoromethyl)benzene **2o** (58.6 mg, 0.20 mmol, 1.0 equiv), anhydrous acetone (1 mL) and PhCF<sub>3</sub> (1 mL). The tube was sealed and removed from the glovebox. The reaction mixture was stirred and irradiated using a 10 W 390 nm LED lamp for 48 hours. The light was removed and 3 N HCl (6 mL) was added to the resulting reaction mixture. After string at room temperature for another 6 hours, the solvent was removed under reduced pressure and the residue was purified by column chromatography on silica gel (EA) to afford **14** as colorless oil (35.6 mg, 65% yield, 90% ee).

The NMR data matched those reported in the literature.<sup>10</sup>

<sup>1</sup>H NMR (600 MHz, Methanol-*d*<sub>4</sub>) δ 7.99 (s, 2H), 7.85 (s, 1H), 4.86 – 4.82 (m, 1H), 3.67 (d, *J* = 5.6 Hz, 2H);

<sup>13</sup>C NMR (151 MHz, Methanol-*d*<sub>4</sub>) δ 146.1, 131.0 (q, *J* = 33.1 Hz), 126.7 (q, *J* = 4.1 Hz), 123.6 (q, *J* = 271.8 Hz), 120.6 (p, *J* = 3.9 Hz), 72.9, 66.7;

<sup>19</sup>F NMR (565 MHz, Methanol-*d*<sub>4</sub>) δ -64.32.

## 6.2 Synthesis of the (*S*)-1-(4-(1,3-dihydroxypropyl)phenyl)ethan-1-one (**15**)

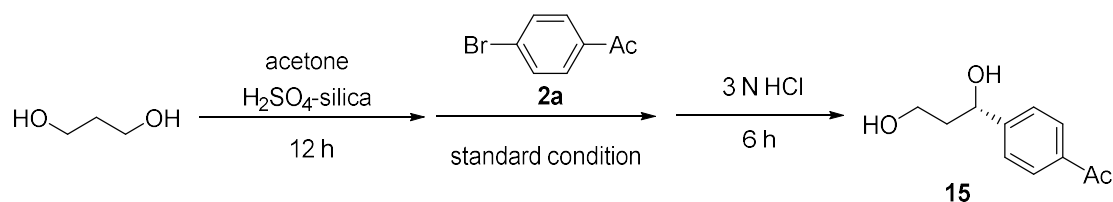

An oven-dried 10 mL tube equipped with a PTFE-coated stir bar was charged with propane-1,3-diol (76.0 mg, 1.0 mmol, 5.0 equiv), anhydrous acetone (0.5 mL) was stirred in the presence of  $\text{H}_2\text{SO}_4$ -silica at room temperature in an argon-filled glovebox. The tube was sealed and stirred at room temperature for 12 hours. The reaction then proceeds with the addition of powdered  $\text{CaCl}_2$  (22.0 mg, 0.2 mmol, 1.0 equiv). Subsequently, the tube was charged with  $\text{NiBr}_2\cdot\text{dme}$  (6.4 mg, 0.02 mmol, 10 mol%), **L6** (11.7 mg, 0.03 mmol, 15 mol%), TBADT (24.6 mg, 0.01 mmol, 5 mol%),  $\text{K}_3\text{PO}_4$  (106.0 mg, 0.50 mmol, 2.5 equiv), 1-(4-bromophenyl)ethan-1-one **2a** (40.0 mg, 0.20 mmol, 1.0 equiv), anhydrous acetone (1 mL) and  $\text{PhCF}_3$  (1 mL). The tube was sealed and removed from the glovebox. The reaction mixture was stirred and irradiated using a 10 W 390 nm LED lamp for 48 hours. The light was removed and 3 N HCl (6 mL) was added to the resulting reaction mixture. After string at room temperature for another 6 hours, the solvent was removed under reduced pressure and the residue was purified by column chromatography on silica gel (EA) to afford **15** as colorless oil (24.0 mg, 62% yield, 90% ee). The NMR data matched those reported in the literature.<sup>11</sup>

$^1\text{H}$  NMR (400 MHz,  $\text{CDCl}_3$ )  $\delta$  7.94 – 7.89 (m, 2H), 7.44 (d,  $J = 8.2$  Hz, 2H), 5.02 (dd,  $J = 7.2$ , 5.1 Hz, 1H), 3.86 (t,  $J = 5.5$  Hz, 2H), 2.82 (s, 2H), 2.58 (s, 3H), 1.99 – 1.91 (m, 2H).

$^{13}\text{C}$  NMR (151 MHz,  $\text{CDCl}_3$ )  $\delta$  198.1, 149.8, 136.2, 128.6, 125.7, 73.7, 61.2, 40.2, 26.6.

## 6.3 Synthesis of the 1-(4-((1*S*,2*R*)-3-chloro-1,2-dihydroxypropyl)phenyl)ethan-1-one (**16**)

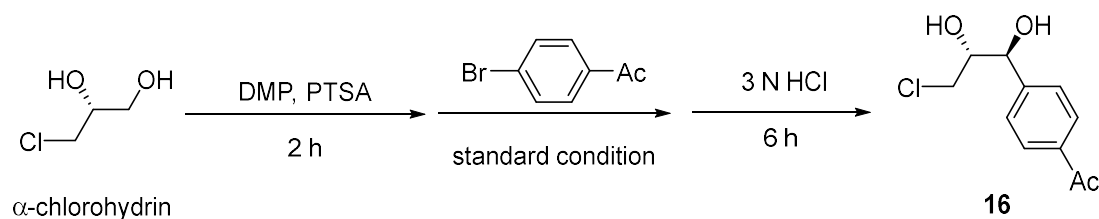

An oven-dried 10 mL tube equipped with a PTFE-coated stir bar was charged with  $\alpha$ -chlorohydrin (110 mg, 1.0 mmol, 5.0 equiv),  $\text{PTSA}\cdot\text{H}_2\text{O}$  (19.0 mg, 0.1 mmol, 10 mol%) and

2,2-dimethoxypropane (124.8 mg, 1.2 mmol, 6.0 equiv) in an argon-filled glovebox. The tube was sealed and stirred at room temperature for 2 hours. Subsequently, the tube was charged with NiBr<sub>2</sub>•dme (6.4 mg, 0.02 mmol, 10 mol%), dtbbpy (8.0 mg, 0.03 mmol, 15 mol%), TBADT (13.3 mg, 0.004 mmol, 2 mol%), K<sub>3</sub>PO<sub>4</sub> (93.3 mg, 0.44 mmol, 2.2 equiv), 1-(4-bromophenyl)ethan-1-one (40.0 mg, 0.20 mmol, 1.0 equiv) and anhydrous MeCN (1 mL). The tube was sealed and removed from the glovebox. The reaction mixture was stirred and irradiated using a 10 W 390 nm LED lamp for 48 hours. The light was removed and 3 N HCl (6 mL) was added to the resulting reaction mixture. After string at room temperature for another 6 hours, the solvent was removed under reduced pressure and the residue was purified by column chromatography on silica gel (EA) to afford **16** as colorless oil (34.2 mg, 75% yield, d.r. > 20/1).  
<sup>1</sup>H NMR (400 MHz, CDCl<sub>3</sub>) δ 8.06 – 7.79 (m, 2H), 7.63 – 7.45 (m, 2H), 4.83 (d, *J* = 6.0 Hz, 1H), 3.89 (q, *J* = 5.5 Hz, 1H), 3.60 (dd, *J* = 11.5, 4.4 Hz, 1H), 3.41 (dd, *J* = 11.5, 5.6 Hz, 1H), 3.13 (s, 1H), 2.97 (s, 1H), 2.58 (s, 3H);  
<sup>13</sup>C NMR (101 MHz, CDCl<sub>3</sub>) δ 198.1, 145.4, 137.1, 128.8, 126.9, 75.3, 74.0, 45.9, 26.8;  
 HRMS: (ESI) calcd for C<sub>11</sub>H<sub>14</sub>ClO<sub>3</sub><sup>+</sup>[M+H]<sup>+</sup> 229.0626; found 229.0629.

#### 6.4 Synthesis of (*R*)-4-(1-hydroxy-2-((methylsulfonyl)oxy)ethyl)-1,2-phenylene diacetate ((-)-Epinephrine)

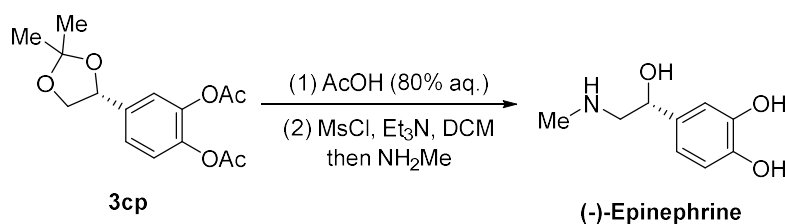

To a 50 mL flask equipped with a PTFE-coated stir bar was added **3cp** (147.3 mg, 0.5 mmol, 1 equiv) and AcOH (4 mL, 80% aq.). The reaction mixture was stirred at room temperature for 4 hours. The solvent was evaporated under reduced pressure and the residue was added DCM (5 mL), Et<sub>3</sub>N (151.8 mg, 1.5 mmol, 3 equiv) and MsCl (85.9 mg, 0.75 mmol, 1.5 equiv) at 0 °C. The reaction was stirred at 0 °C for an hour, then NH<sub>2</sub>Me (155.3 mg, 5 mmol, 10 equiv, 33% in EtOH) was added. After stirring at room temperature overnight, the solvent was evaporated under reduced pressure and the residue was purified by flash chromatography on silica gel (DCM/MeOH/Et<sub>3</sub>N) to afford (*-*)-**Epinephrine** as brown solid (58.6 mg, 64% yield).



The NMR data matched those reported in the literature.<sup>12</sup>

<sup>1</sup>H NMR (400 MHz, DMSO-*d*<sub>6</sub>) δ 6.68 (d, *J* = 2.0 Hz, 1H), 6.61 (d, *J* = 8.1 Hz, 1H), 6.51 (dd, *J* = 8.0, 2.0 Hz, 1H), 4.41 (dd, *J* = 8.2, 4.5 Hz, 1H), 2.56 – 2.47 (m, 2H), 2.26 (s, 3H);

<sup>13</sup>C NMR (151 MHz, DMSO-*d*<sub>6</sub>) δ 145.4, 144.6, 135.8, 117.2, 115.5, 113.9, 71.1, 60.0, 36.2.

### 6.5 Synthesis of (*R*)-2-(2-chlorophenyl)-2-hydroxyethyl carbamate ((*R*)-Carisbamate)

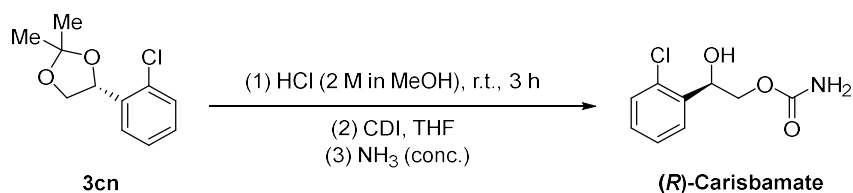

To a 50 mL flask equipped with a PTFE-coated stir bar was added **3cn** (82.5 mg, 0.388 mmol, 1 equiv) and HCl (6 mL) (2 M in MeOH). The reaction mixture was stirred at room temperature for 3 hours. The solvent was evaporated under reduced pressure and the residue was used in the next step without further purification.

To a solution of the obtained crude product in THF (2 mL) was added CDI (67.0 mg, 0.41 mmol). The resulting mixture was stirred at room temperature for overnight, then ammonia solution (0.11 mL) was added. After stirring for another 12 hours, the reaction was quenched with 1 M HCl solution and extracted with EA. The organic phase was washed with saturated NaHCO<sub>3</sub> (aq.) and brine, and dried over anhydrous Na<sub>2</sub>SO<sub>4</sub>. The solvent was removed under reduced pressure and the residue was purified by flash chromatography on silica gel (EA) to afford (*R*)-Carisbamate (18.4 mg, 22% yield).

<sup>1</sup>H NMR (600 MHz, CDCl<sub>3</sub>) δ 7.64 (dd, *J* = 7.8, 1.7 Hz, 1H), 7.35 (dd, *J* = 7.9, 1.3 Hz, 1H), 7.32 (td, *J* = 7.6, 1.3 Hz, 1H), 7.24 (dd, *J* = 7.6, 1.7 Hz, 1H), 5.37 (dd, *J* = 7.8, 2.6 Hz, 1H), 4.82 (s, 2H), 4.34 (dd, *J* = 11.9, 2.7 Hz, 1H), 4.22 (dd, *J* = 11.9, 7.7 Hz, 1H), 3.38 (s, 1H);

<sup>13</sup>C NMR (151 MHz, CDCl<sub>3</sub>) δ 157.4, 137.2, 132.0, 129.5, 129.2, 127.9, 127.2, 70.0, 68.8;

Optical Rotation: [ $\alpha$ ]<sub>D</sub><sup>22</sup> -20.4 (c 0.1, <sup>t</sup>PrOH) for 82% ee.

### 6.6 Synthesis of (*S*)-1-(3-chlorophenyl)propane-1,3-diol (**17**)

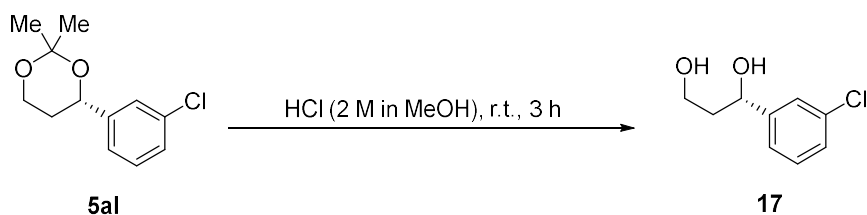

To a 50-mL flask equipped with a PTFE-coated stir bar was added **5al** (28.1 mg, 0.124 mmol, 1 equiv) and HCl (2 mL) (2 M in MeOH). The reaction mixture was stirred at room temperature for 3 hours. The solvent was evaporated under reduced pressure and the residue was purified by flash chromatography on silica gel (EA) to afford **17** (20.8 mg, 90% yield).

The NMR data matched those reported in the literature.<sup>13</sup>

<sup>1</sup>H NMR (600 MHz, CDCl<sub>3</sub>) δ 7.38 (s, 1H), 7.31 – 7.19 (m, 4H), 5.00 – 4.91 (m, 1H), 3.88 (t, *J* = 5.2 Hz, 2H), 2.58 (s, 3H), 2.05 – 1.90 (m, 2H);

<sup>13</sup>C NMR (151 MHz, CDCl<sub>3</sub>) δ 146.4, 134.4, 129.8, 127.6, 125.9, 123.8, 73.7, 61.4, 40.4;

Optical Rotation: [α]<sub>D</sub><sup>23</sup> -20.5 (c 0.2, <sup>i</sup>PrOH) for 88% ee.

### 6.7 Synthesis of (*R*)-2-(3-chlorophenyl)-2-hydroxyethyl 4-methylbenzenesulfonate (**18**)

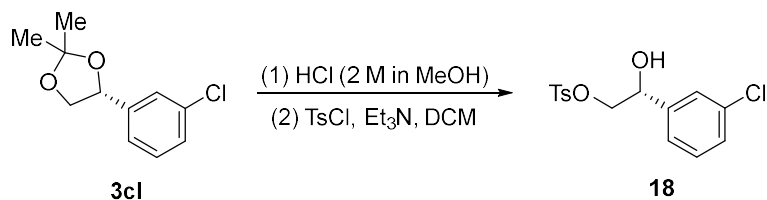

To a 50 mL flask equipped with a PTFE-coated stir bar was added **3cl** (118.1 mg, 0.555 mmol, 1 equiv) and HCl (6 mL) (2 M in MeOH). The reaction mixture was stirred at room temperature for 3 hours. The solvent was evaporated under reduced pressure and the residue was purified by flash chromatography on silica gel (EA) to afford the crude diol (85.6 mg, 89% yield).

To a solution of the obtained crude diol in DCM (2 mL) and Et<sub>3</sub>N (0.1 mL, 0.735 mmol, 1.5 equiv) was added TsCl (103.0 mg, 0.54 mmol, 1.1 equiv) at 0 °C. The reaction was stirred at rt for 24 hours. The solvent was evaporated under reduced pressure and the residue was purified by flash chromatography on silica gel (PE/EA) to afford **18** (100.8 mg, 62% yield).

The NMR data matched those reported in the literature.<sup>14</sup>

$^1\text{H}$  NMR (600 MHz,  $\text{CDCl}_3$ )  $\delta$  7.77 – 7.74 (m, 2H), 7.35 – 7.32 (m, 2H), 7.30 (d,  $J = 4.2$  Hz, 1H), 7.28 – 7.26 (m, 2H), 7.21 – 7.18 (m, 1H), 4.96 (dt,  $J = 8.3, 2.7$  Hz, 1H), 4.14 (dd,  $J = 10.5, 3.3$  Hz, 1H), 4.02 (dd,  $J = 10.5, 8.3$  Hz, 1H), 2.66 (d,  $J = 3.1$  Hz, 1H), 2.45 (s, 3H);

$^{13}\text{C}$  NMR (151 MHz,  $\text{CDCl}_3$ )  $\delta$  145.3, 140.3, 134.7, 132.5, 130.02, 129.95, 128.7, 128.0, 126.4, 124.4, 74.0, 71.4, 21.7.

## 6.8 Synthesis of the (*R*)-1-(3,5-bis(trifluoromethyl)phenyl)-2-((2-hydroxyethyl)amino)ethan-1-ol (**20**)

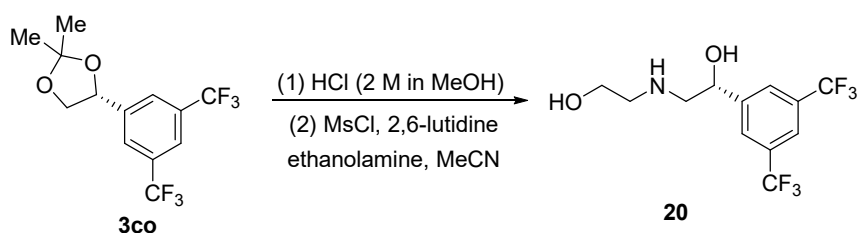

To a solution of **14** (274.1 mg, 1 mmol, 1 equiv) in MeCN (5 mL) and 2,6-lutidine (535.5 mg, 5 mmol, 5 equiv) was added MsCl (137.5 mg, 1.2 mmol, 1.2 equiv) at 0 °C. The reaction was stirred at 0 °C for an hour followed by addition of ethanolamine (305.4 mg, 5 mmol, 5 equiv). After stirring at room temperature overnight, the reaction mixture was partitioned between aqueous  $\text{NaHCO}_3$  and EA and the organic layer was washed with brane. After drying with  $\text{Na}_2\text{SO}_4$ , the organic layer was evaporated under reduced pressure and the residue was purified by flash chromatography on silica gel (DCM/MeOH/ $\text{Et}_3\text{N}$ ) to afford **20** as white solid (237.6 mg, 74% yield).

The NMR data matched those reported in the literature.<sup>10</sup>

$^1\text{H}$  NMR (400 MHz, Methanol- $d_4$ )  $\delta$  7.98 (s, 2H), 7.84 (s, 1H), 4.94 (dd,  $J = 8.9, 3.8$  Hz, 1H), 3.71 – 3.61 (m, 2H), 2.86 (dd,  $J = 12.4, 3.7$  Hz, 1H), 2.83 – 2.72 (m, 3H);

$^{13}\text{C}$  NMR (151 MHz, Methanol- $d_4$ )  $\delta$  147.0, 131.3 (q,  $J = 33.1$  Hz), 126.2 (q,  $J = 4.2$  Hz), 123.8 (q,  $J = 272.3$  Hz), 120.7 (m), 70.5, 60.0, 56.1, 50.6.

$^{19}\text{F}$  NMR (565 MHz, Methanol- $d_4$ )  $\delta$  -64.33.

## 6.9 Synthesis of 4-((4*S*,5*R*)-5-(chloromethyl)-2,2-dimethyl-1,3-dioxolan-4-yl)-2-methoxyphenyl acetate (**21**)

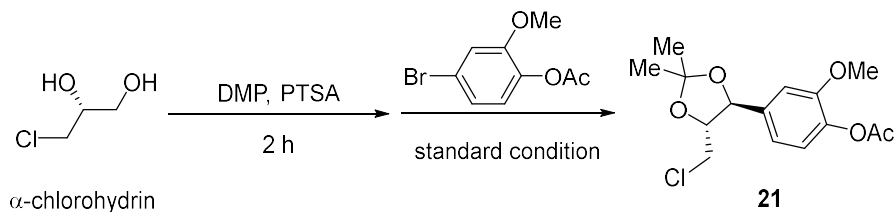

An oven-dried 10 mL tube equipped with a PTFE-coated stir bar was charged with  $\alpha$ -chlorohydrin (110 mg, 1.0 mmol, 5.0 equiv), PTSA-H<sub>2</sub>O (19.0 mg, 0.1 mmol, 10 mol%) and 2,2-dimethoxypropane (124.8 mg, 1.2 mmol, 1.2 equiv) in an argon-filled glovebox. The tube was sealed and stirred at room temperature for 2 hours. Subsequently, the tube was charged with NiBr<sub>2</sub>•dme (6.4 mg, 0.02 mmol, 10 mol%), dtbbpy (8.0 mg, 0.03 mmol, 15 mol%), TBADT (13.3 mg, 0.004 mmol, 2 mol%), K<sub>3</sub>PO<sub>4</sub> (93.3 mg, 0.44 mmol, 2.2 equiv), 4-bromo-2-methoxyphenyl acetate (49.2 mg, 0.2 mmol, 1.0 equiv) and anhydrous MeCN (1 mL). The tube was sealed and removed from the glovebox. The reaction mixture was stirred and irradiated using a 10 W 390 nm LED lamp for 48 hours. The solvent was removed under reduced pressure and the residue was purified by column chromatography on silica gel (PE/EA = 10/1) to afford **21** as colorless oil (47.9 mg, 70% yield, d.r. > 20/1).

<sup>1</sup>H NMR (600 MHz, CDCl<sub>3</sub>)  $\delta$  7.05 – 7.01 (m, 2H), 6.95 (dd,  $J$  = 8.1, 1.9 Hz, 1H), 4.89 (d,  $J$  = 8.1 Hz, 1H), 4.03 (ddd,  $J$  = 8.1, 4.6, 3.6 Hz, 1H), 3.85 (s, 3H), 3.76 (dd,  $J$  = 12.1, 3.5 Hz, 1H), 3.63 (dd,  $J$  = 12.1, 4.6 Hz, 1H), 2.31 (s, 3H), 1.58 (s, 3H), 1.55 (s, 3H);

<sup>13</sup>C NMR (151 MHz, CDCl<sub>3</sub>)  $\delta$  169.0, 151.4, 139.8, 136.1, 123.0, 118.8, 110.3, 109.9, 82.1, 79.9, 55.9, 42.9, 27.2, 27.0, 20.7;

HRMS: (ESI) calcd for C<sub>15</sub>H<sub>20</sub>ClO<sub>5</sub><sup>+</sup>[M+H]<sup>+</sup> 315.0999; found 315.0997.

#### 6.10 Synthesis of (1*S*,2*R*)-3-chloro-1-(4-hydroxy-3-methoxyphenyl)propane-1,2-diol (**22**)

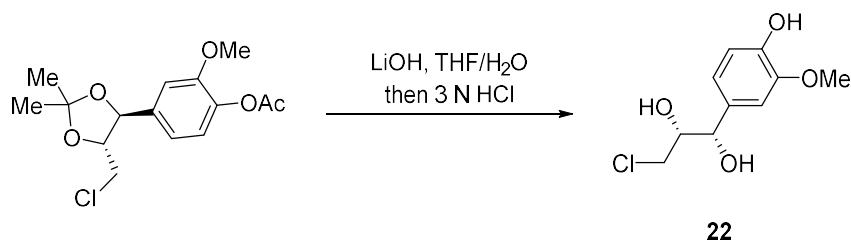

To a 50 mL flask equipped with a PTFE-coated stir bar was added **15** (47.9 mg, 0.14 mmol, 1 equiv), LiOH (33.6, 1.4 mmol, 10.0 equiv), THF (1 mL) and H<sub>2</sub>O (1.5 mL). The reaction mixture was stirred at room temperature for 2 hours, then 3 N HCl (6 mL) was added. After

stirring at room temperature for another 6 hours, the solvent was removed under reduced pressure and the residue was purified by column chromatography on silica gel (DCM/MeOH = 30/1) to afford **22** as yellow oil (19.5 mg, 60% yield, d.r. > 20/1).

The NMR data consistent with reported literature.<sup>15</sup>

<sup>1</sup>H NMR (600 MHz, CDCl<sub>3</sub>) δ 6.92 (d, *J* = 1.9 Hz, 1H), 6.90 (d, *J* = 8.1 Hz, 1H), 6.86 (dd, *J* = 8.1, 1.9 Hz, 1H), 5.66 (s, 1H), 4.66 (d, *J* = 7.0 Hz, 1H), 3.91 (s, 3H), 3.87 (ddd, *J* = 7.0, 5.8, 3.7 Hz, 1H), 3.57 (dd, *J* = 11.5, 3.7 Hz, 1H), 3.40 (dd, *J* = 11.5, 5.7 Hz, 1H), 2.89 – 2.59 (m, 2H);  
<sup>13</sup>C NMR (151 MHz, CDCl<sub>3</sub>) δ 146.8, 145.8, 131.6, 119.8, 114.5, 108.9, 75.6, 74.8, 56.0, 46.3.

### 6.11 Synthesis of 2-((4*S*,5*R*)-5-(chloromethyl)-2,2-dimethyl-1,3-dioxolan-4-yl)pyridine (**23**)

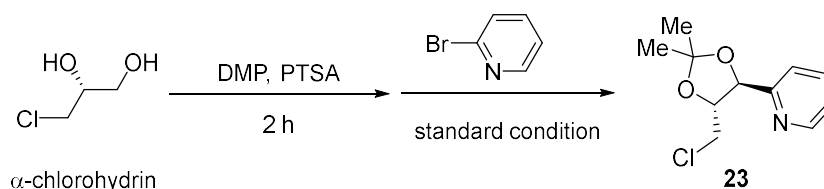

An oven-dried 10-mL tube equipped with a PTFE-coated stir bar was charged with  $\alpha$ -chlorohydrin (110 mg, 1.0 mmol, 5.0 equiv), PTSA·H<sub>2</sub>O (19.0 mg, 0.1 mmol, 10 mol%) and 2,2-dimethoxypropane (124.8 mg, 1.2 mmol, 1.2 equiv) in an argon-filled glovebox. The tube was sealed and stirred at room temperature for 2 hours. Subsequently, the tube was charged with NiBr<sub>2</sub>·dme (6.4 mg, 0.02 mmol, 10 mol%), dtbbpy (8.0 mg, 0.03 mmol, 15 mol%), TBADT (13.3 mg, 0.004 mmol, 2 mol%), K<sub>3</sub>PO<sub>4</sub> (93.3 mg, 0.44 mmol, 2.2 equiv), 2-bromopyridine (31.4 mg, 0.2 mmol, 1.0 equiv) and anhydrous MeCN (1 mL). The tube was sealed and removed from the glovebox. The reaction mixture was stirred and irradiated using a 10 W 390 nm LED lamp for 48 hours. The solvent was removed under reduced pressure and the residue was purified by column chromatography on silica gel (PE/EA = 10/1) to afford **23** as yellow oil (30.8 mg, 68% yield, d.r. > 20/1).

<sup>1</sup>H NMR (600 MHz, CDCl<sub>3</sub>) δ 8.70 – 8.40 (m, 1H), 7.79 – 7.59 (m, 1H), 7.54 (d, *J* = 7.8 Hz, 1H), 7.24 – 7.20 (m, 1H), 4.94 (d, *J* = 8.0 Hz, 1H), 4.24 (ddd, *J* = 8.0, 5.9, 3.0 Hz, 1H), 4.02 (dd, *J* = 11.9, 3.0 Hz, 1H), 3.84 (dd, *J* = 11.9, 5.9 Hz, 1H), 1.58 (s, 3H), 1.53 (s, 3H);

<sup>13</sup>C NMR (151 MHz, CDCl<sub>3</sub>) δ 158.4, 149.2, 136.9, 122.9, 120.2, 110.5, 81.5, 80.2, 44.4, 27.1, 27.0;

HRMS: (ESI) calcd for  $C_{11}H_{15}ClNO_2^+[M+H]^+$  228.0791; found 228.0793.

### 6.12 Synthesis of 2-((4*S*,5*R*)-5-((diphenylphosphaneyl)methyl)-2,2-dimethyl-1,3-dioxolan-4-yl)pyridine (**24**)

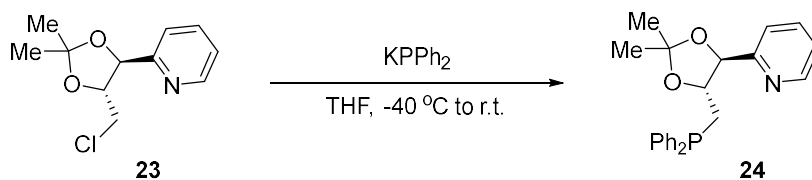

An oven-dried 10-mL tube equipped with a PTFE-coated stir bar was charged with **23** (30.8 mg, 0.14 mmol, 1 equiv) and anhydrous THF (1 mL) under Ar atmosphere.  $KPPH_2$  (420  $\mu\text{L}$ , 0.2 mmol, 1.5 equiv, 0.5 M in THF) was added to the mixture at  $-40\text{ }^\circ\text{C}$  and the reaction mixture was warmed to room temperature. After the reaction was complete, the reaction mixture was quenched with  $NH_4Cl$  (aq.). The solvent was removed under reduced pressure and the residue was purified by column chromatography on silica gel (PE/EA = 15/1) to afford **24** as yellow oil (39.8 mg, 78% yield, d.r. > 20/1).

The NMR data consistent with reported literature.<sup>16</sup>

$^1\text{H}$  NMR (600 MHz,  $CDCl_3$ )  $\delta$  8.65 – 8.46 (m, 1H), 7.69 – 7.59 (m, 1H), 7.43 (d,  $J = 7.9$  Hz, 1H), 7.40 – 7.34 (m, 4H), 7.30 – 7.22 (m, 6H), 7.21 – 7.16 (m, 1H), 4.88 (d,  $J = 8.1$  Hz, 1H), 4.05 (qd,  $J = 8.3, 3.5$  Hz, 1H), 2.78 (ddd,  $J = 14.1, 3.5, 2.5$  Hz, 1H), 2.48 (ddd,  $J = 14.2, 8.7, 3.1$  Hz, 1H), 1.53 (s, 3H), 1.47 (s, 3H);

$^{13}\text{C}$  NMR (151 MHz,  $CDCl_3$ )  $\delta$  158.3, 149.0, 139.1, 139.0, 138.0, 137.9, 136.8, 133.2, 133.1, 132.6, 132.5, 128.7, 128.37, 128.35, 128.32, 128.29, 128.2, 122.9, 120.7, 109.8, 84.2, 84.1, 80.0, 79.9, 31.7, 31.6, 27.4, 26.8;

$^{31}\text{P}$  NMR (243 MHz,  $CDCl_3$ )  $\delta$  -22.39.

### 6.13 Synthesis of 2-(((4*S*,5*S*)-2,2-dimethyl-5-phenyl-1,3-dioxolan-4-yl)methyl)isoindoline-1,3-dione (**25**)

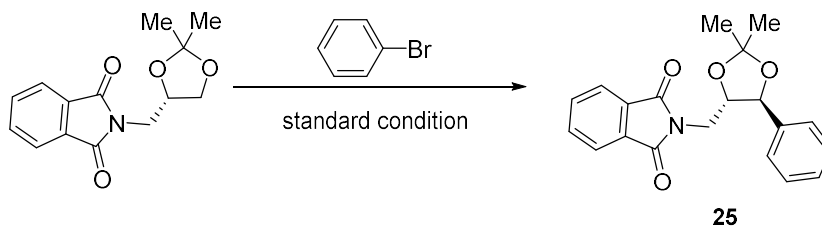

The tube was charged with NiBr<sub>2</sub>•dme (3.1 mg, 0.01 mmol, 10 mol%), dtbbpy (4.2 mg, 0.015 mmol, 15 mol%), TBADT (6.8 mg, 0.002 mmol, 2 mol%), (*S*)-2-((2,2-dimethyl-1,3-dioxolan-4-yl)methyl)isoindoline-1,3-dione (130.5 mg, 0.5 mmol, 5 equiv), K<sub>3</sub>PO<sub>4</sub> (46.0 mg, 0.22 mmol, 2.2 equiv), bromobenzene (15.7 mg, 0.1 mmol, 1.0 equiv) and anhydrous MeCN (1 mL). The tube was sealed and removed from the glovebox. The reaction mixture was stirred and irradiated using a 10 W 390 nm LED lamp for 48 hours. The solvent was removed under reduced pressure and the residue was purified by column chromatography on silica gel (PE/EA = 10/1) to afford **25** as yellow oil (29.6 mg, 88% yield, d.r. > 20/1).

<sup>1</sup>H NMR (600 MHz, CDCl<sub>3</sub>) δ 7.79 (dd, *J* = 5.4, 3.0 Hz, 2H), 7.69 (dd, *J* = 5.5, 3.0 Hz, 2H), 7.43 – 7.40 (m, 2H), 7.26 – 7.23 (m, 2H), 7.20 – 7.17 (m, 1H), 4.76 (d, *J* = 8.5 Hz, 1H), 4.26 (dt, *J* = 8.5, 5.5 Hz, 1H), 3.98 (d, *J* = 5.5 Hz, 2H), 1.54 (s, 3H), 1.44 (s, 3H).

<sup>13</sup>C NMR (151 MHz, CDCl<sub>3</sub>) δ 168.2, 136.9, 134.0, 131.8, 128.5, 128.4, 127.0, 123.3, 109.7, 81.4, 79.8, 38.4, 27.1, 27.0.

HRMS: (ESI) calcd for C<sub>20</sub>H<sub>19</sub>NO<sub>4</sub>Na<sup>+</sup>[M+Na]<sup>+</sup> 360.1206; found 360.1194.

#### 6.14 Synthesis of (*1S,2S*)-3-amino-1-phenylpropane-1,2-diol (**26**)

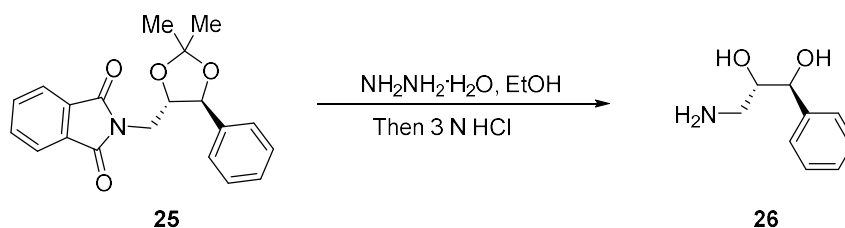

To a solution of **25** (51.2 mg, 0.15 mmol) in EtOH (1 mL) was added hydrazine hydrate (20 μL, > 85%). The resulting mixture was reflux for 6 hours. The reaction solution was filtered through celite, and the organic layer was concentrated in vacuo to afford the crude amine.

To a solution of the crude amine in THF (1 mL) was added 3 N HCl (1 mL). The resulting mixture was stirred at rt for 1 hour, and then 1 N NaOH (1 mL) was added. The solvent was removed under reduced pressure and the residue was purified by column chromatography on

silica gel (EA) to afford **26** as colorless oil (18.0 mg, 90% yield, d.r. > 20/1).

The NMR data matched those reported in the literature.<sup>17</sup>

<sup>1</sup>H NMR (600 MHz, Methanol-*d*<sub>4</sub>) δ 7.40 – 7.36 (m, 2H), 7.36 – 7.32 (m, 2H), 7.29 – 7.25 (m, 1H), 4.50 (d, *J* = 6.1 Hz, 1H), 3.65 (q, *J* = 6.1 Hz, 1H), 2.52 (d, *J* = 6.0 Hz, 2H);

<sup>13</sup>C NMR (151 MHz, Methanol-*d*<sub>4</sub>) δ 143.0, 129.1, 128.5, 127.8, 77.4, 76.9, 44.6.

### 6.15 Synthesis of 3-(*tert*-butyl) 4-methyl (4*S*,5*R*)-5-(4-(2-cyanoethoxy)phenyl)-2,2-dimethyloxazolidine-3,4-dicarboxylate (**28**)

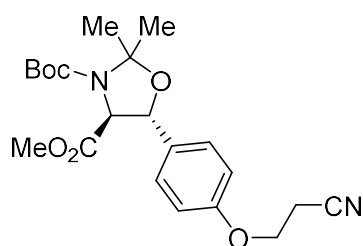

Chemical Formula: C<sub>21</sub>H<sub>28</sub>N<sub>2</sub>O<sub>6</sub>

Exact Mass: 404.1947

**28** was prepared according to general procedure **2.3** using NiBr<sub>2</sub>•dme (6.4 mg, 0.02 mmol, 10 mol%), dtbbpy (8.0 mg, 0.03 mmol, 15 mol%), TBADT (13.3 mg, 0.004 mmol, 2 mol%), K<sub>3</sub>PO<sub>4</sub> (50.9 mg, 0.24 mmol, 1.2 equiv), 3-(4-bromophenoxy)propanenitrile (45.0 mg, 0.20 mmol, 1.0 equiv), 3-(*tert*-butyl) 4-methyl (*S*)-2,2-dimethyloxazolidine-3,4-dicarboxylate **27** (259 mg, 1.0 mmol, 5.0 equiv) and anhydrous MeCN (1 mL) and was purified by silica gel column chromatography (PE/EA = 5/1) to obtain **28** as colorless oil (59.1 mg, 73% yield, d.r. > 20/1).

<sup>1</sup>H NMR (600 MHz, CDCl<sub>3</sub>) δ 7.36 – 7.28 (m, 2H), 6.95 – 6.72 (m, 2H), 5.07 – 4.82 (m, 1H), 4.29 – 4.07 (m, 3H), 3.73 (s, 3H), 2.81 (t, *J* = 6.3 Hz, 2H), 1.81 – 1.63 (m, 6H), 1.48 (s, 3H), 1.38 (s, 6H);

<sup>13</sup>C NMR (151 MHz, CDCl<sub>3</sub>) δ 170.7, 158.1, 151.8, 150.9, 130.7, 130.6, 128.1, 128.0, 117.1, 114.8, 95.6, 94.9, 81.1, 80.6, 79.2, 78.9, 66.8, 66.6, 62.71, 62.69, 52.5, 52.3, 28.4, 28.2, 27.6, 26.4, 25.0, 24.1, 18.6 (rotamer);

HRMS: (ESI) calcd for C<sub>21</sub>H<sub>29</sub>N<sub>2</sub>O<sub>6</sub><sup>+</sup>[M+H]<sup>+</sup> 405.2020; found 405.2006.

### 6.16 Synthesis of methyl (2*S*,3*R*)-2-amino-3-(4-(2-cyanoethoxy)phenyl)-3-hydroxy



**propanoate (29)**

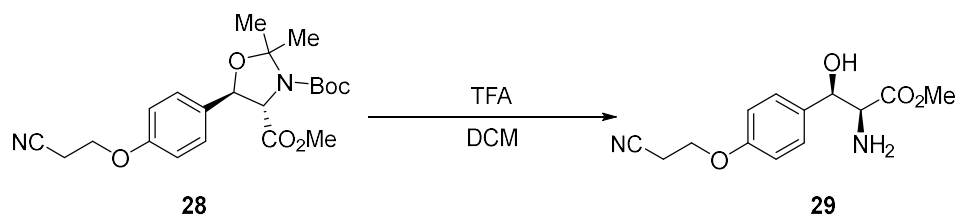

To a solution of **28** (59.1 mg, 0.15 mmol) in DCM (5 mL) was added TFA (0.5 mL). After stirring at room temperature for 6 hours, the solvent was concentrated in vacuo and the residue was purified by flash chromatography on silica gel (PE/EA = 1/1) to afford **29** as yellow oil (29.3 mg, 76% yield).

$^1\text{H}$  NMR (600 MHz,  $\text{CDCl}_3$ )  $\delta$  7.44 – 7.32 (m, 2H), 7.11 – 6.79 (m, 2H), 6.06 (s, 1H), 5.60 (d,  $J = 5.1$  Hz, 1H), 4.27 (d,  $J = 5.1$  Hz, 1H), 4.21 (t,  $J = 6.3$  Hz, 2H), 3.86 (s, 3H), 2.85 (t,  $J = 6.3$  Hz, 2H);

$^{13}\text{C}$  NMR (151 MHz,  $\text{CDCl}_3$ )  $\delta$  170.0, 158.4, 157.9, 131.2, 127.2, 117.1, 115.1, 79.2, 62.8, 61.3, 53.3, 18.6;

HRMS: (ESI) calcd for  $\text{C}_{13}\text{H}_{14}\text{N}_2\text{O}_3^+[\text{M}-\text{H}_2\text{O}+\text{H}]^+$  247.1077; found 247.1076.

## 7. X-Ray Crystallographic Data

### 7.1 X-Ray Crystallographic Analysis of 3cg

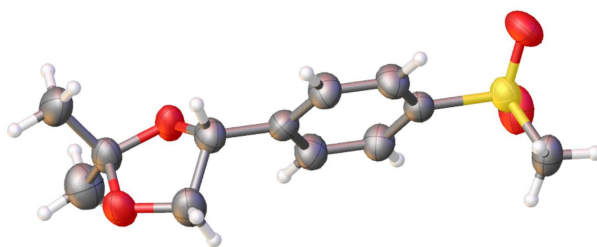

CCDC: 2335066

Supplementary Figure 95. Structure of compound 3cg

Table S4: Crystal data and structure refinement for 3cg.

|                                    |                                                  |
|------------------------------------|--------------------------------------------------|
| Empirical formula                  | C <sub>12</sub> H <sub>16</sub> O <sub>4</sub> S |
| Formula weight                     | 256.31                                           |
| Temperature/K                      | 299.58(10)                                       |
| Crystal system                     | monoclinic                                       |
| Space group                        | P2 <sub>1</sub>                                  |
| a/Å                                | 5.6714(2)                                        |
| b/Å                                | 14.3623(7)                                       |
| c/Å                                | 7.9791(4)                                        |
| α/°                                | 90                                               |
| β/°                                | 101.543(4)                                       |
| γ/°                                | 90                                               |
| Volume/Å <sup>3</sup>              | 636.78(5)                                        |
| Z                                  | 2                                                |
| ρ <sub>calc</sub> /cm <sup>3</sup> | 1.337                                            |
| μ/mm <sup>-1</sup>                 | 2.285                                            |
| F(000)                             | 272.0                                            |
| Crystal size/mm <sup>3</sup>       | 0.12 × 0.09 × 0.08                               |
| Radiation                          | Cu Kα (λ = 1.54184)                              |
| 2θ range for data collection/°     | 11.318 to 133.062                                |
| Index ranges                       | -6 ≤ h ≤ 4, -17 ≤ k ≤ 16, -9 ≤ l ≤ 9             |

|                                                |                                                                  |
|------------------------------------------------|------------------------------------------------------------------|
| Reflections collected                          | 4349                                                             |
| Independent reflections                        | 1930 [ $R_{\text{int}} = 0.0155$ , $R_{\text{sigma}} = 0.0209$ ] |
| Data/restraints/parameters                     | 1930/1/157                                                       |
| Goodness-of-fit on $F^2$                       | 1.038                                                            |
| Final R indexes [ $I > 2\sigma(I)$ ]           | $R_1 = 0.0288$ , $wR_2 = 0.0751$                                 |
| Final R indexes [all data]                     | $R_1 = 0.0296$ , $wR_2 = 0.0758$                                 |
| Largest diff. peak/hole / $e \text{ \AA}^{-3}$ | 0.11/-0.20                                                       |
| Flack parameter                                | -0.001(11)                                                       |

**Table S5: Fractional Atomic Coordinates ( $\times 10^4$ ) and Equivalent Isotropic Displacement Parameters ( $\text{\AA}^2 \times 10^3$ ) for 3cg.  $U_{\text{eq}}$  is defined as 1/3 of the trace of the orthogonalised  $U_{\text{IJ}}$  tensor.**

| Atom | $x$       | $y$        | $z$       | $U(\text{eq})$ |
|------|-----------|------------|-----------|----------------|
| S14  | 174.4(11) | 6500.6(5)  | 6718.5(8) | 47.5(2)        |
| O15  | -174(4)   | 6929(2)    | 8272(3)   | 69.6(7)        |
| O16  | 2574(3)   | 6274.3(19) | 6536(3)   | 67.8(7)        |
| O11  | -2432(3)  | 9562.1(15) | 315(3)    | 54.8(5)        |
| C5   | -41(5)    | 7310(2)    | 3587(4)   | 49.5(7)        |
| O9   | -5310(3)  | 9227.7(17) | -2035(3)  | 56.8(6)        |
| C1   | -3115(5)  | 8393.8(19) | 2324(4)   | 44.9(6)        |
| C10  | -3434(5)  | 9877(2)    | -1368(4)  | 49.8(7)        |
| C17  | -1569(5)  | 5483(2)    | 6404(4)   | 58.3(8)        |
| C7   | -4239(5)  | 9025(2)    | 873(4)    | 51.1(7)        |
| C2   | -4164(5)  | 8299(2)    | 3732(4)   | 52.6(7)        |
| C6   | -1062(5)  | 7889(2)    | 2247(4)   | 53.3(7)        |
| C3   | -3194(5)  | 7717(2)    | 5072(4)   | 52.5(7)        |
| C4   | -1112(5)  | 7235.0(19) | 4999(3)   | 42.0(6)        |
| C8   | -5389(6)  | 8543(3)    | -776(4)   | 60.0(8)        |
| C13  | -4508(7)  | 10834(3)   | -1329(5)  | 68.9(9)        |
| C12  | -1506(6)  | 9826(3)    | -2409(5)  | 74.8(10)       |

**Table S6: Anisotropic Displacement Parameters ( $\text{\AA}^2 \times 10^3$ ) for 3cg. The Anisotropic displacement factor exponent takes the form:  $-2\pi^2[h^2a^*U_{11}+2hka^*b^*U_{12}+\dots]$ .**

| Atom | $U_{11}$ | $U_{22}$ | $U_{33}$ | $U_{23}$ | $U_{13}$ | $U_{12}$  |
|------|----------|----------|----------|----------|----------|-----------|
| S14  | 43.4(3)  | 53.4(4)  | 43.1(3)  | 6.0(3)   | 2.7(2)   | -2.4(3)   |
| O15  | 85.4(16) | 81.9(17) | 37.9(12) | -3.7(11) | 3.9(10)  | 2.6(13)   |
| O16  | 40.2(9)  | 82.7(19) | 77.7(15) | 24.9(13) | 5.3(9)   | 3.3(11)   |
| O11  | 61.5(11) | 47.2(12) | 47.3(11) | 10.3(9)  | -9.7(8)  | -13.4(10) |
| C5   | 47.0(15) | 50.2(18) | 54.0(16) | 6.7(14)  | 16.5(12) | 6.5(12)   |
| O9   | 57.0(12) | 62.6(14) | 45.4(10) | 3.4(10)  | -2.4(8)  | -16.3(10) |
| C1   | 50.8(14) | 39.5(15) | 44.2(14) | -0.2(12) | 9.6(11)  | 0.1(12)   |
| C10  | 46.8(15) | 52.3(18) | 45.4(16) | 8.2(13)  | -2.5(11) | -6.3(12)  |
| C17  | 56.6(16) | 52.7(17) | 63(2)    | 15.1(15) | 5.8(14)  | -3.6(14)  |
| C7   | 53.2(16) | 51.1(17) | 48.7(16) | 4.3(13)  | 9.5(13)  | 8.1(13)   |
| C2   | 52.2(16) | 54.2(18) | 53.0(17) | 4.4(14)  | 13.9(13) | 11.9(14)  |
| C6   | 58.8(16) | 55.2(18) | 50.0(16) | 5.1(14)  | 20.6(12) | 3.0(14)   |
| C3   | 57.7(15) | 58.3(18) | 45.3(15) | 1.7(14)  | 19.5(12) | 6.4(14)   |
| C4   | 42.8(13) | 40.8(14) | 41.3(13) | 0.2(11)  | 6.0(10)  | -2.7(11)  |
| C8   | 57.3(17) | 61(2)    | 56.4(18) | 7.1(16)  | -0.4(13) | -14.3(15) |
| C13  | 80(2)    | 53.0(19) | 65(2)    | 7.6(16)  | -6.3(16) | 5.4(17)   |
| C12  | 65(2)    | 88(3)    | 74(2)    | 12(2)    | 18.6(16) | -6.6(19)  |

**Table S7: Bond Lengths for 3cg.**

| Atom | Atom | Length/Å | Atom | Atom | Length/Å |
|------|------|----------|------|------|----------|
| S14  | O15  | 1.433(2) | O9   | C8   | 1.413(4) |
| S14  | O16  | 1.434(2) | C1   | C7   | 1.508(4) |
| S14  | C17  | 1.754(3) | C1   | C2   | 1.379(4) |
| S14  | C4   | 1.768(3) | C1   | C6   | 1.384(4) |
| O11  | C10  | 1.423(3) | C10  | C13  | 1.507(5) |
| O11  | C7   | 1.424(4) | C10  | C12  | 1.501(5) |
| C5   | C6   | 1.387(4) | C7   | C8   | 1.514(4) |
| C5   | C4   | 1.386(4) | C2   | C3   | 1.382(4) |
| O9   | C10  | 1.434(4) | C3   | C4   | 1.380(4) |

**Table S8: Bond Angles for 3cg.**

| Atom | Atom | Atom | Angle/°    | Atom | Atom | Atom | Angle/°  |
|------|------|------|------------|------|------|------|----------|
| O15  | S14  | O16  | 118.87(15) | O11  | C10  | C12  | 108.0(3) |
| O15  | S14  | C17  | 108.10(17) | O9   | C10  | C13  | 109.1(2) |
| O15  | S14  | C4   | 107.96(15) | O9   | C10  | C12  | 109.4(3) |
| O16  | S14  | C17  | 108.40(16) | C12  | C10  | C13  | 113.4(3) |
| O16  | S14  | C4   | 107.99(14) | O11  | C7   | C1   | 110.2(2) |
| C17  | S14  | C4   | 104.64(13) | O11  | C7   | C8   | 100.8(2) |
| C10  | O11  | C7   | 106.9(2)   | C1   | C7   | C8   | 115.8(3) |
| C4   | C5   | C6   | 119.3(3)   | C1   | C2   | C3   | 121.3(3) |
| C8   | O9   | C10  | 108.4(2)   | C1   | C6   | C5   | 120.3(3) |
| C2   | C1   | C7   | 120.0(3)   | C4   | C3   | C2   | 118.8(3) |
| C2   | C1   | C6   | 119.2(3)   | C5   | C4   | S14  | 119.8(2) |
| C6   | C1   | C7   | 120.7(3)   | C3   | C4   | S14  | 119.3(2) |
| O11  | C10  | O9   | 105.7(2)   | C3   | C4   | C5   | 120.9(3) |
| O11  | C10  | C13  | 110.9(3)   | O9   | C8   | C7   | 103.3(3) |

**Table S9: Hydrogen Atom Coordinates ( $\text{\AA} \times 10^4$ ) and Isotropic Displacement Parameters ( $\text{\AA}^2 \times 10^3$ ) for 3cg.**

| Atom | <i>x</i> | <i>y</i> | <i>z</i> | U(eq) |
|------|----------|----------|----------|-------|
| H5   | 1348.38  | 6975.09  | 3540.24  | 59    |
| H17A | -933.41  | 5037.2   | 7273.35  | 87    |
| H17B | -1525.66 | 5227.4   | 5298.91  | 87    |
| H17C | -3200.79 | 5628.51  | 6467.08  | 87    |
| H7   | -5410.23 | 9438.41  | 1244.63  | 61    |
| H2   | -5552.57 | 8633.52  | 3780.73  | 63    |
| H6   | -362.9   | 7937.56  | 1290.59  | 64    |
| H3   | -3931.05 | 7650.59  | 6006.61  | 63    |
| H8A  | -4483.82 | 7993.72  | -968.47  | 72    |
| H8B  | -7034.24 | 8363.5   | -762.52  | 72    |
| H13A | -5699.31 | 10824.48 | -627.24  | 103   |
| H13B | -5246.03 | 11018.52 | -2470.27 | 103   |
| H13C | -3263.75 | 11269.51 | -865.32  | 103   |
| H12A | -268.26  | 10270.98 | -1981.63 | 112   |
| H12B | -2189.56 | 9963.74  | -3583.07 | 112   |
| H12C | -827.94  | 9211.44  | -2327.66 | 112   |

#### Crystal structure determination of [3cg]

**Crystal Data** for  $\text{C}_{12}\text{H}_{16}\text{O}_4\text{S}$  ( $M=256.31$  g/mol): monoclinic, space group  $P2_1$  (no. 4),  $a = 5.6714(2)$   $\text{\AA}$ ,  $b = 14.3623(7)$   $\text{\AA}$ ,  $c = 7.9791(4)$   $\text{\AA}$ ,  $\beta = 101.543(4)^\circ$ ,  $V = 636.78(5)$   $\text{\AA}^3$ ,  $Z = 2$ ,  $T = 299.58(10)$  K,  $\mu(\text{Cu K}\alpha) = 2.285$   $\text{mm}^{-1}$ ,  $D_{\text{calc}} = 1.337$   $\text{g/cm}^3$ , 4349 reflections measured ( $11.318^\circ \leq 2\theta \leq 133.062^\circ$ ), 1930 unique ( $R_{\text{int}} = 0.0155$ ,  $R_{\text{sigma}} = 0.0209$ ) which were used in all calculations. The final  $R_1$  was 0.0288 ( $I > 2\sigma(I)$ ) and  $wR_2$  was 0.0758 (all data).

## 7.2 X-Ray Crystallographic Analysis of 5ag

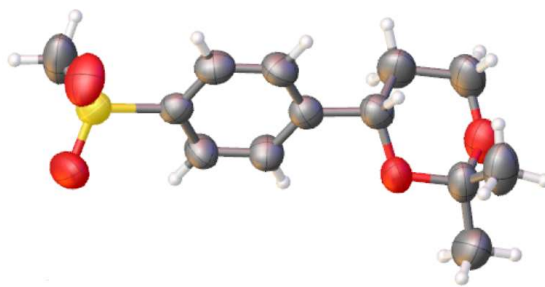

CCDC: 2335067

Supplementary Figure 96. Structure of compound 5ag

Table S10: Crystal data and structure refinement for 5ag.

|                                    |                                                               |
|------------------------------------|---------------------------------------------------------------|
| Empirical formula                  | C <sub>26</sub> H <sub>36</sub> O <sub>8</sub> S <sub>2</sub> |
| Formula weight                     | 540.67                                                        |
| Temperature/K                      | 296.54(10)                                                    |
| Crystal system                     | monoclinic                                                    |
| Space group                        | P2 <sub>1</sub>                                               |
| a/Å                                | 12.4193(10)                                                   |
| b/Å                                | 10.1926(5)                                                    |
| c/Å                                | 12.5200(9)                                                    |
| α/°                                | 90                                                            |
| β/°                                | 118.653(10)                                                   |
| γ/°                                | 90                                                            |
| Volume/Å <sup>3</sup>              | 1390.8(2)                                                     |
| Z                                  | 2                                                             |
| ρ <sub>calc</sub> /cm <sup>3</sup> | 1.291                                                         |
| μ/mm <sup>-1</sup>                 | 2.119                                                         |
| F(000)                             | 576.0                                                         |
| Crystal size/mm <sup>3</sup>       | 0.12 × 0.08 × 0.05                                            |
| Radiation                          | Cu Kα (λ = 1.54184)                                           |
| 2θ range for data collection/°     | 8.048 to 133.198                                              |
| Index ranges                       | -14 ≤ h ≤ 14, -11 ≤ k ≤ 12, -14 ≤ l ≤ 14                      |
| Reflections collected              | 8306                                                          |

|                                                |                                                                  |
|------------------------------------------------|------------------------------------------------------------------|
| Independent reflections                        | 4002 [ $R_{\text{int}} = 0.0257$ , $R_{\text{sigma}} = 0.0361$ ] |
| Data/restraints/parameters                     | 4002/1/331                                                       |
| Goodness-of-fit on $F^2$                       | 1.047                                                            |
| Final R indexes [ $I \geq 2\sigma(I)$ ]        | $R_1 = 0.0370$ , $wR_2 = 0.0951$                                 |
| Final R indexes [all data]                     | $R_1 = 0.0463$ , $wR_2 = 0.0996$                                 |
| Largest diff. peak/hole / $e \text{ \AA}^{-3}$ | 0.15/-0.17                                                       |
| Flack parameter                                | 0.080(16)                                                        |



**Table S11: Fractional Atomic Coordinates ( $\times 10^4$ ) and Equivalent Isotropic Displacement Parameters ( $\text{\AA}^2 \times 10^3$ ) for 5ag.  $U_{\text{eq}}$  is defined as 1/3 of the trace of the orthogonalised**

**$U_{ij}$  tensor.**

| Atom | $x$       | $y$        | $z$       | $U(\text{eq})$ |
|------|-----------|------------|-----------|----------------|
| S13  | 1015.6(8) | 7631.0(10) | 3439.1(7) | 58.2(2)        |
| S31  | 4053.1(8) | 2653.9(9)  | 5460.1(8) | 62.5(2)        |
| O6   | 1264(2)   | 8142(3)    | -1729(2)  | 61.8(6)        |
| O4   | 1875(3)   | 6988(3)    | -2951(3)  | 71.0(7)        |
| O14  | 1338(3)   | 8962(3)    | 3813(3)   | 79.2(8)        |
| O20  | 3629(3)   | 3005(3)    | 10553(2)  | 67.6(7)        |
| O15  | -99(2)    | 7135(4)    | 3345(2)   | 84.0(10)       |
| O22  | 3466(3)   | 1675(3)    | 11996(3)  | 83.0(9)        |
| O32  | 5244(3)   | 2977(4)    | 5647(3)   | 100.1(11)      |
| O33  | 3079(3)   | 3539(3)    | 4759(3)   | 102.7(12)      |
| C25  | 4346(3)   | 2290(3)    | 9204(3)   | 55.5(8)        |
| C28  | 4147(3)   | 2469(3)    | 6907(3)   | 53.3(8)        |
| C8   | 1525(3)   | 8144(4)    | 531(3)    | 59.3(9)        |
| C9   | 1601(3)   | 8266(4)    | 1669(3)   | 57.7(9)        |
| C10  | 956(3)    | 7433(4)    | 2007(3)   | 53.9(8)        |
| C26  | 3220(3)   | 2530(5)    | 8197(3)   | 63.5(9)        |
| C7   | 799(3)    | 7195(4)    | -269(3)   | 58.9(9)        |
| C27  | 3120(3)   | 2618(5)    | 7050(3)   | 63.6(9)        |
| C1   | 700(4)    | 7032(4)    | -1517(3)  | 66.5(10)       |
| C29  | 5271(3)   | 2219(4)    | 7896(4)   | 66.4(10)       |
| C19  | 4499(4)   | 2160(4)    | 10470(3)  | 62.0(9)        |
| C23  | 4304(5)   | 748(5)     | 11976(4)  | 89.8(15)       |
| C5   | 1268(4)   | 8142(4)    | -2879(3)  | 65.4(10)       |
| C24  | 4279(5)   | 765(4)     | 10750(4)  | 83.4(13)       |
| C18  | 2077(5)   | 9273(5)    | -2809(4)  | 87.8(14)       |
| C16  | 2222(4)   | 6638(5)    | 4435(4)   | 75.5(11)       |
| C2   | 1292(5)   | 5785(4)    | -1647(4)  | 78.9(12)       |
| C30  | 5370(3)   | 2138(4)    | 9045(3)   | 67.3(10)       |
| C17  | -14(4)    | 8269(7)    | -3935(4)  | 103.5(19)      |

| Atom | x       | y       | z        | U(eq)     |
|------|---------|---------|----------|-----------|
| C35  | 4845(5) | 3537(5) | 12700(4) | 97.4(16)  |
| C21  | 3643(4) | 2978(4) | 11705(3) | 73.7(12)  |
| C11  | 222(5)  | 6465(5) | 1222(4)  | 84.1(14)  |
| C3   | 1333(5) | 5800(4) | -2846(4) | 89.4(15)  |
| C34  | 3624(6) | 1119(5) | 4767(4)  | 101.8(18) |
| C12  | 149(5)  | 6363(5) | 85(4)    | 94.2(16)  |
| C36  | 2554(5) | 3758(6) | 11538(5) | 110.1(19) |

**Table S12: Anisotropic Displacement Parameters ( $\text{\AA}^2 \times 10^3$ ) for 5ag. The Anisotropic displacement factor exponent takes the form:  $-2\pi^2[h^2a^{*2}U_{11}+2hka^*b^*U_{12}+\dots]$ .**

| Atom | $U_{11}$ | $U_{22}$ | $U_{33}$ | $U_{23}$  | $U_{13}$ | $U_{12}$  |
|------|----------|----------|----------|-----------|----------|-----------|
| S13  | 59.6(5)  | 67.2(5)  | 53.1(4)  | -1.6(5)   | 31.2(4)  | 2.3(5)    |
| S31  | 76.5(5)  | 53.1(4)  | 69.1(5)  | 7.0(5)    | 43.9(5)  | 4.7(5)    |
| O6   | 77.4(16) | 62.1(14) | 52.5(13) | -2.1(11)  | 36.4(12) | 1.6(13)   |
| O4   | 86.7(19) | 64.2(16) | 79.1(17) | -6.9(14)  | 53.2(16) | 5.4(15)   |
| O14  | 111(2)   | 66.5(17) | 72.3(18) | -7.8(14)  | 53.2(17) | 6.4(16)   |
| O20  | 90.7(17) | 59.9(16) | 52.0(13) | 6.4(11)   | 34.0(13) | 7.8(14)   |
| O15  | 66.1(15) | 128(3)   | 69.1(16) | -15.2(16) | 41.5(14) | -16.8(17) |
| O22  | 115(3)   | 67.4(18) | 74.2(18) | 5.7(15)   | 51.4(18) | -13.1(18) |
| O32  | 91.6(19) | 139(3)   | 92(2)    | -9(2)     | 61.9(17) | -22(2)    |
| O33  | 136(3)   | 103(3)   | 92(2)    | 45(2)     | 73(2)    | 52(2)     |
| C25  | 61(2)    | 44.6(18) | 56.9(19) | -0.6(15)  | 25.0(17) | -4.9(16)  |
| C28  | 60.7(19) | 42.0(18) | 61.1(18) | 1.9(16)   | 32.5(16) | 0.8(16)   |
| C8   | 61(2)    | 63(2)    | 56(2)    | -2.9(18)  | 30.1(17) | -7.5(18)  |
| C9   | 58(2)    | 61(2)    | 54(2)    | -7.7(17)  | 26.6(17) | -5.7(18)  |
| C10  | 57.2(18) | 55(2)    | 52.2(17) | 1.1(16)   | 28.5(15) | 1.3(17)   |
| C26  | 54.6(18) | 75(2)    | 60.0(19) | 0(2)      | 27.0(16) | 1(2)      |
| C7   | 56.9(19) | 68(2)    | 51.8(18) | -6.1(17)  | 26.4(16) | -8.0(18)  |
| C27  | 53.7(18) | 78(2)    | 54.5(18) | 9(2)      | 22.2(15) | 8(2)      |
| C1   | 69(2)    | 78(3)    | 51(2)    | -8.0(19)  | 28.0(18) | -14(2)    |
| C29  | 57(2)    | 63(2)    | 81(3)    | -0.8(19)  | 35(2)    | 1.2(18)   |
| C19  | 67(2)    | 56(2)    | 57(2)    | 1.5(17)   | 25.3(18) | 0.2(19)   |

| Atom | $U_{11}$ | $U_{22}$ | $U_{33}$ | $U_{23}$ | $U_{13}$ | $U_{12}$ |
|------|----------|----------|----------|----------|----------|----------|
| C23  | 137(4)   | 62(2)    | 72(3)    | 13(2)    | 51(3)    | 0(3)     |
| C5   | 73(2)    | 78(3)    | 53(2)    | 2.0(19)  | 36.8(19) | 8(2)     |
| C24  | 124(4)   | 52(2)    | 80(3)    | 6(2)     | 54(3)    | 5(2)     |
| C18  | 131(4)   | 67(3)    | 96(3)    | 4(2)     | 79(3)    | 6(3)     |
| C16  | 77(3)    | 91(3)    | 59(2)    | 15(2)    | 33(2)    | 10(2)    |
| C2   | 111(4)   | 63(2)    | 72(3)    | -16(2)   | 51(3)    | -19(2)   |
| C30  | 56(2)    | 72(2)    | 63(2)    | 5.1(19)  | 20.1(18) | 9.1(19)  |
| C17  | 86(3)    | 172(6)   | 55(2)    | 13(3)    | 35(2)    | 19(4)    |
| C35  | 145(5)   | 80(3)    | 68(3)    | -14(2)   | 52(3)    | -29(3)   |
| C21  | 104(3)   | 66(3)    | 54(2)    | 2.4(19)  | 39(2)    | 0(2)     |
| C11  | 109(3)   | 87(3)    | 73(3)    | -16(2)   | 57(3)    | -37(3)   |
| C3   | 136(4)   | 67(2)    | 84(3)    | -20(2)   | 68(3)    | -20(3)   |
| C34  | 167(5)   | 72(3)    | 67(3)    | -5(2)    | 57(3)    | -12(3)   |
| C12  | 115(4)   | 107(4)   | 71(3)    | -31(3)   | 53(3)    | -54(3)   |
| C36  | 143(5)   | 114(4)   | 94(4)    | 18(3)    | 74(4)    | 38(4)    |

**Table S13: Bond Lengths for 5ag.**

| Atom | Atom | Length/Å | Atom | Atom | Length/Å |
|------|------|----------|------|------|----------|
| S13  | O14  | 1.429(3) | C28  | C27  | 1.379(5) |
| S13  | O15  | 1.425(3) | C28  | C29  | 1.374(5) |
| S13  | C10  | 1.770(3) | C8   | C9   | 1.387(5) |
| S13  | C16  | 1.741(4) | C8   | C7   | 1.373(5) |
| S31  | O32  | 1.421(3) | C9   | C10  | 1.366(5) |
| S31  | O33  | 1.425(3) | C10  | C11  | 1.383(5) |
| S31  | C28  | 1.769(3) | C26  | C27  | 1.384(5) |
| S31  | C34  | 1.744(5) | C7   | C1   | 1.516(5) |
| O6   | C1   | 1.421(5) | C7   | C12  | 1.383(6) |
| O6   | C5   | 1.442(4) | C1   | C2   | 1.516(6) |
| O4   | C5   | 1.423(5) | C29  | C30  | 1.386(5) |
| O4   | C3   | 1.422(5) | C19  | C24  | 1.520(6) |
| O20  | C19  | 1.425(4) | C23  | C24  | 1.521(6) |

| <b>Atom</b> | <b>Atom</b> | <b>Length/Å</b> | <b>Atom</b> | <b>Atom</b> | <b>Length/Å</b> |
|-------------|-------------|-----------------|-------------|-------------|-----------------|
| O20         | C21         | 1.434(4)        | C5          | C18         | 1.503(6)        |
| O22         | C23         | 1.414(6)        | C5          | C17         | 1.510(6)        |
| O22         | C21         | 1.422(5)        | C2          | C3          | 1.527(6)        |
| C25         | C26         | 1.383(5)        | C35         | C21         | 1.524(6)        |
| C25         | C19         | 1.509(5)        | C21         | C36         | 1.495(7)        |
| C25         | C30         | 1.388(5)        | C11         | C12         | 1.386(6)        |

**Table S14: Bond Angles for 5ag.**

| Atom | Atom | Atom | Angle/°    | Atom | Atom | Atom | Angle/°  |
|------|------|------|------------|------|------|------|----------|
| O14  | S13  | C10  | 108.00(17) | C8   | C7   | C12  | 118.5(3) |
| O14  | S13  | C16  | 107.9(2)   | C12  | C7   | C1   | 119.5(3) |
| O15  | S13  | O14  | 118.2(2)   | C28  | C27  | C26  | 119.9(3) |
| O15  | S13  | C10  | 107.99(16) | O6   | C1   | C7   | 107.6(3) |
| O15  | S13  | C16  | 108.7(2)   | O6   | C1   | C2   | 109.9(3) |
| C16  | S13  | C10  | 105.24(18) | C2   | C1   | C7   | 113.4(3) |
| O32  | S31  | O33  | 117.6(2)   | C28  | C29  | C30  | 119.5(3) |
| O32  | S31  | C28  | 107.68(17) | O20  | C19  | C25  | 107.8(3) |
| O32  | S31  | C34  | 109.6(3)   | O20  | C19  | C24  | 108.8(3) |
| O33  | S31  | C28  | 108.56(17) | C25  | C19  | C24  | 112.3(3) |
| O33  | S31  | C34  | 107.2(2)   | O22  | C23  | C24  | 110.6(4) |
| C34  | S31  | C28  | 105.59(19) | O6   | C5   | C18  | 105.3(3) |
| C1   | O6   | C5   | 115.2(3)   | O6   | C5   | C17  | 111.5(3) |
| C3   | O4   | C5   | 114.2(3)   | O4   | C5   | O6   | 108.6(3) |
| C19  | O20  | C21  | 114.7(3)   | O4   | C5   | C18  | 106.1(3) |
| C23  | O22  | C21  | 114.5(3)   | O4   | C5   | C17  | 112.5(4) |
| C26  | C25  | C19  | 122.4(3)   | C18  | C5   | C17  | 112.4(4) |
| C26  | C25  | C30  | 119.0(3)   | C19  | C24  | C23  | 109.0(3) |
| C30  | C25  | C19  | 118.6(3)   | C1   | C2   | C3   | 110.1(4) |
| C27  | C28  | S31  | 120.7(3)   | C29  | C30  | C25  | 120.7(3) |
| C29  | C28  | S31  | 118.8(3)   | O20  | C21  | C35  | 110.4(4) |
| C29  | C28  | C27  | 120.5(3)   | O20  | C21  | C36  | 106.0(3) |
| C7   | C8   | C9   | 120.7(3)   | O22  | C21  | O20  | 110.3(3) |
| C10  | C9   | C8   | 120.1(3)   | O22  | C21  | C35  | 110.5(4) |
| C9   | C10  | S13  | 119.9(3)   | O22  | C21  | C36  | 107.0(4) |
| C9   | C10  | C11  | 120.5(3)   | C36  | C21  | C35  | 112.4(4) |
| C11  | C10  | S13  | 119.6(3)   | C10  | C11  | C12  | 118.7(4) |
| C25  | C26  | C27  | 120.4(3)   | O4   | C3   | C2   | 109.9(3) |
| C8   | C7   | C1   | 122.0(3)   | C7   | C12  | C11  | 121.5(4) |

**Table S15: Hydrogen Atom Coordinates ( $\text{\AA}\times 10^4$ ) and Isotropic Displacement Parameters ( $\text{\AA}^2\times 10^3$ ) for 5ag.**

| Atom | x       | y       | z        | U(eq) |
|------|---------|---------|----------|-------|
| H8   | 1968.73 | 8711.51 | 307.69   | 71    |
| H9   | 2092.46 | 8915.03 | 2201.86  | 69    |
| H26  | 2526.52 | 2632.36 | 8291.64  | 76    |
| H27  | 2360.53 | 2776.98 | 6376     | 76    |
| H1   | -170.35 | 7023.76 | -2127.68 | 80    |
| H29  | 5959.84 | 2105.5  | 7794.52  | 80    |
| H19  | 5330.13 | 2433.51 | 11065.37 | 74    |
| H23A | 4091.02 | -121.13 | 12129.44 | 108   |
| H23B | 5125.23 | 951.7   | 12615.26 | 108   |
| H24A | 4911.03 | 188.71  | 10772.14 | 100   |
| H24B | 3490.14 | 455.29  | 10120.53 | 100   |
| H18A | 1737.71 | 10074.8 | -2697.7  | 132   |
| H18B | 2126.08 | 9320.81 | -3550.64 | 132   |
| H18C | 2883.27 | 9144.86 | -2135.56 | 132   |
| H16A | 2970.97 | 6928.07 | 4464.45  | 113   |
| H16B | 2062.12 | 5745.73 | 4156.37  | 113   |
| H16C | 2297.65 | 6692.15 | 5233.88  | 113   |
| H2A  | 826.39  | 5030.51 | -1625.78 | 95    |
| H2B  | 2118.44 | 5712.25 | -972.39  | 95    |
| H30  | 6131.55 | 1978.9  | 9716.29  | 81    |
| H17A | -484.29 | 7507.29 | -3967.87 | 155   |
| H17B | 25.35   | 8340.63 | -4679.81 | 155   |
| H17C | -398.16 | 9037.74 | -3827.74 | 155   |
| H35A | 5504.54 | 2947.16 | 12844.97 | 146   |
| H35B | 4791.29 | 3642.07 | 13434.31 | 146   |
| H35C | 4998.16 | 4373.61 | 12446.1  | 146   |
| H11  | -213.9  | 5894    | 1451.72  | 101   |
| H3A  | 1808.3  | 5058.45 | -2874.92 | 107   |
| H3B  | 507.96  | 5723.41 | -3521.55 | 107   |
| H34A | 3488.07 | 1175.66 | 3946.18  | 153   |

| Atom | <i>x</i> | <i>y</i> | <i>z</i> | U(eq) |
|------|----------|----------|----------|-------|
| H34B | 2883.12  | 838.97   | 4760.9   | 153   |
| H34C | 4265.37  | 496.36   | 5212.66  | 153   |
| H12  | -349.78  | 5720.3   | -452.37  | 113   |
| H36A | 2666.6   | 4661.29  | 11397.04 | 165   |
| H36B | 2466.26  | 3691.46  | 12257.8  | 165   |
| H36C | 1829.02  | 3423.65  | 10853.52 | 165   |

### Crystal structure determination of 5ag

**Crystal Data** for  $C_{26}H_{36}O_8S_2$  ( $M=540.67$  g/mol): monoclinic, space group  $P2_1$  (no. 4),  $a = 12.4193(10)$  Å,  $b = 10.1926(5)$  Å,  $c = 12.5200(9)$  Å,  $\beta = 118.653(10)^\circ$ ,  $V = 1390.8(2)$  Å<sup>3</sup>,  $Z = 2$ ,  $T = 296.54(10)$  K,  $\mu(\text{Cu K}\alpha) = 2.119$  mm<sup>-1</sup>,  $D_{\text{calc}} = 1.291$  g/cm<sup>3</sup>, 8306 reflections measured ( $8.048^\circ \leq 2\Theta \leq 133.198^\circ$ ), 4002 unique ( $R_{\text{int}} = 0.0257$ ,  $R_{\text{sigma}} = 0.0361$ ) which were used in all calculations. The final  $R_1$  was 0.0370 ( $I > 2\sigma(I)$ ) and  $wR_2$  was 0.0996 (all data).

### 7.3 X-Ray Crystallographic Analysis of 10b

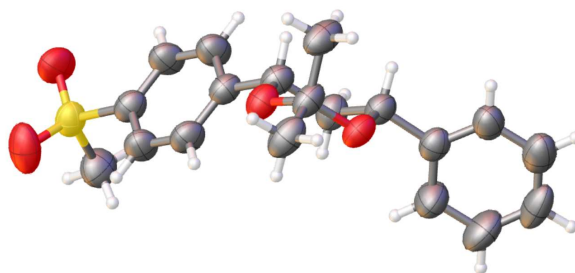

CCDC:2353650

Supplementary Figure 97. Structure of compound 10b

Table S16: Crystal data and structure refinement for 10b.

|                                    |                                                               |
|------------------------------------|---------------------------------------------------------------|
| Empirical formula                  | C <sub>19</sub> H <sub>22</sub> O <sub>4</sub> S              |
| Formula weight                     | 346.42                                                        |
| Temperature/K                      | 298.58(10)                                                    |
| Crystal system                     | monoclinic                                                    |
| Space group                        | C2                                                            |
| a/Å                                | 17.440(2)                                                     |
| b/Å                                | 8.8300(4)                                                     |
| c/Å                                | 15.9598(19)                                                   |
| α/°                                | 90                                                            |
| β/°                                | 131.37(2)                                                     |
| γ/°                                | 90                                                            |
| Volume/Å <sup>3</sup>              | 1844.5(5)                                                     |
| Z                                  | 4                                                             |
| ρ <sub>calc</sub> /cm <sup>3</sup> | 1.247                                                         |
| μ/mm <sup>-1</sup>                 | 1.715                                                         |
| F(000)                             | 736.0                                                         |
| Crystal size/mm <sup>3</sup>       | 0.15 × 0.1 × 0.08                                             |
| Radiation                          | Cu Kα (λ = 1.54184)                                           |
| 2θ range for data collection/°     | 7.38 to 133.148                                               |
| Index ranges                       | -20 ≤ h ≤ 16, -10 ≤ k ≤ 10, -18 ≤ l ≤ 18                      |
| Reflections collected              | 10747                                                         |
| Independent reflections            | 3197 [R <sub>int</sub> = 0.0574, R <sub>sigma</sub> = 0.0474] |
| Data/restraints/parameters         | 3197/1/220                                                    |
| Goodness-of-fit on F <sup>2</sup>  | 1.034                                                         |



|                                                |                               |
|------------------------------------------------|-------------------------------|
| Final R indexes [ $I \geq 2\sigma(I)$ ]        | $R_1 = 0.0489, wR_2 = 0.1314$ |
| Final R indexes [all data]                     | $R_1 = 0.0609, wR_2 = 0.1409$ |
| Largest diff. peak/hole / $e \text{ \AA}^{-3}$ | 0.46/-0.22                    |
| Flack parameter                                | 0.04(2)                       |

**Table S17: Fractional Atomic Coordinates ( $\times 10^4$ ) and Equivalent Isotropic Displacement Parameters ( $\text{\AA}^2 \times 10^3$ ) for 10b.  $U_{eq}$  is defined as 1/3 of the trace of the orthogonalised  $U_{ij}$  tensor.**

| Atom | x         | y          | z         | U(eq)    |
|------|-----------|------------|-----------|----------|
| S13  | 5478.5(9) | 6721.1(13) | 1678.7(9) | 60.0(3)  |
| O4   | 6978(2)   | 5964(4)    | 7939(3)   | 59.3(8)  |
| O2   | 7201(2)   | 7198(4)    | 6815(3)   | 62.1(8)  |
| O14  | 6188(3)   | 6220(5)    | 1571(3)   | 80.5(12) |
| O15  | 5100(4)   | 8243(4)    | 1348(4)   | 95.0(14) |
| C5   | 7081(4)   | 4478(5)    | 7636(4)   | 57.6(11) |
| C3   | 7518(4)   | 7130(6)    | 7895(4)   | 62.3(13) |
| C10  | 6033(3)   | 6471(5)    | 3077(4)   | 56.6(11) |
| C11  | 6826(4)   | 5471(6)    | 3761(4)   | 66.3(12) |
| C7   | 6855(4)   | 6073(5)    | 5258(4)   | 55.8(10) |
| C6   | 6722(4)   | 4558(6)    | 6492(4)   | 62.2(11) |
| C9   | 5647(4)   | 7271(6)    | 3478(4)   | 62.6(11) |
| C17  | 6510(4)   | 3408(5)    | 7789(4)   | 60.3(11) |
| C8   | 6047(4)   | 7076(6)    | 4544(4)   | 62.5(12) |
| C12  | 7234(4)   | 5279(6)    | 4842(4)   | 66.6(13) |
| C1   | 7293(4)   | 5813(6)    | 6432(4)   | 58.8(11) |
| C24  | 8673(4)   | 6950(9)    | 8798(4)   | 77.9(17) |
| C22  | 7032(4)   | 2628(7)    | 8767(5)   | 71.0(13) |
| C23  | 7148(5)   | 8596(6)    | 8012(6)   | 78.5(16) |
| C21  | 6541(5)   | 1639(9)    | 8944(6)   | 88.4(17) |
| C18  | 5460(4)   | 3222(7)    | 6975(5)   | 81.3(15) |
| C20  | 5520(6)   | 1422(6)    | 8138(7)   | 87.8(19) |
| C16  | 4446(4)   | 5489(8)    | 936(5)    | 80.9(15) |
| C19  | 4966(5)   | 2231(8)    | 7153(6)   | 95(2)    |

**Table S18: Anisotropic Displacement Parameters ( $\text{\AA}^2 \times 10^3$ ) for 10b. The Anisotropic displacement factor exponent takes the form:  $-2\pi^2[h^2a^{*2}U_{11}+2hka^*b^*U_{12}+\dots]$ .**

| Atom | $U_{11}$ | $U_{22}$ | $U_{33}$ | $U_{23}$  | $U_{13}$ | $U_{12}$  |
|------|----------|----------|----------|-----------|----------|-----------|
| S13  | 78.3(7)  | 57.4(5)  | 64.4(6)  | 1.7(5)    | 55.7(6)  | 5.0(6)    |
| O4   | 65.4(18) | 63.5(17) | 67.8(19) | -10.9(14) | 52.0(17) | -12.5(14) |
| O2   | 74.0(19) | 63.1(19) | 64.4(19) | -10.6(14) | 52.2(17) | -13.2(14) |
| O14  | 86(2)    | 110(3)   | 75(2)    | 5.1(19)   | 66(2)    | 13(2)     |
| O15  | 161(4)   | 55(2)    | 103(3)   | 15.9(19)  | 102(3)   | 24(2)     |
| C5   | 60(3)    | 62(2)    | 65(3)    | -1(2)     | 47(2)    | -2(2)     |
| C3   | 69(3)    | 70(3)    | 64(3)    | -11(2)    | 52(3)    | -17(2)    |
| C10  | 65(2)    | 57(3)    | 65(3)    | -7(2)     | 50(2)    | -3(2)     |
| C11  | 70(3)    | 79(3)    | 66(3)    | 1(2)      | 52(3)    | 16(3)     |
| C7   | 58(2)    | 62(2)    | 60(3)    | -6(2)     | 44(2)    | -7(2)     |
| C6   | 76(3)    | 60(2)    | 65(3)    | -7(2)     | 52(3)    | -6(2)     |
| C9   | 69(3)    | 69(3)    | 67(3)    | 4(2)      | 52(3)    | 14(2)     |
| C17  | 72(3)    | 57(2)    | 70(3)    | -2(2)     | 55(3)    | 0(2)      |
| C8   | 70(3)    | 69(3)    | 71(3)    | -6(2)     | 56(3)    | 3(2)      |
| C12  | 69(3)    | 79(3)    | 63(3)    | 5(2)      | 49(3)    | 17(2)     |
| C1   | 59(3)    | 64(3)    | 63(3)    | -6(2)     | 45(2)    | -3(2)     |
| C24  | 67(3)    | 115(5)   | 61(3)    | -19(3)    | 46(2)    | -27(3)    |
| C22  | 82(3)    | 72(3)    | 79(3)    | 15(3)     | 62(3)    | 15(3)     |
| C23  | 102(4)   | 69(3)    | 100(4)   | -25(3)    | 82(4)    | -26(3)    |
| C21  | 116(5)   | 76(3)    | 118(5)   | 21(4)     | 96(4)    | 21(4)     |
| C18  | 75(3)    | 86(4)    | 82(4)    | 7(3)      | 51(3)    | -12(3)    |
| C20  | 133(6)   | 55(3)    | 139(6)   | -1(3)     | 117(5)   | -9(3)     |
| C16  | 82(4)    | 95(4)    | 61(3)    | -2(3)     | 45(3)    | -6(3)     |
| C19  | 97(4)    | 98(5)    | 113(5)   | -15(4)    | 79(4)    | -34(4)    |

**Table S19: Bond Lengths for 10b.**

| <b>Atom</b> | <b>Atom</b> | <b>Length/Å</b> | <b>Atom</b> | <b>Atom</b> | <b>Length/Å</b> |
|-------------|-------------|-----------------|-------------|-------------|-----------------|
| S13         | O14         | 1.426(3)        | C10         | C9          | 1.389(6)        |
| S13         | O15         | 1.435(4)        | C11         | C12         | 1.375(7)        |
| S13         | C10         | 1.765(5)        | C7          | C8          | 1.395(7)        |
| S13         | C16         | 1.735(6)        | C7          | C12         | 1.396(6)        |
| O4          | C5          | 1.450(6)        | C7          | C1          | 1.501(7)        |
| O4          | C3          | 1.428(5)        | C6          | C1          | 1.535(7)        |
| O2          | C3          | 1.421(5)        | C9          | C8          | 1.357(7)        |
| O2          | C1          | 1.424(6)        | C17         | C22         | 1.364(7)        |
| C5          | C6          | 1.490(7)        | C17         | C18         | 1.387(8)        |
| C5          | C17         | 1.506(6)        | C22         | C21         | 1.378(9)        |
| C3          | C24         | 1.524(7)        | C21         | C20         | 1.354(9)        |
| C3          | C23         | 1.512(7)        | C18         | C19         | 1.384(8)        |
| C10         | C11         | 1.374(7)        | C20         | C19         | 1.381(10)       |

**Table S20: Bond Angles for 10b.**

| <b>Atom</b> | <b>Atom</b> | <b>Atom</b> | <b>Angle/°</b> | <b>Atom</b> | <b>Atom</b> | <b>Atom</b> | <b>Angle/°</b> |
|-------------|-------------|-------------|----------------|-------------|-------------|-------------|----------------|
| O14         | S13         | O15         | 118.1(3)       | C10         | C11         | C12         | 119.3(4)       |
| O14         | S13         | C10         | 108.6(2)       | C8          | C7          | C12         | 118.1(4)       |
| O14         | S13         | C16         | 108.3(3)       | C8          | C7          | C1          | 121.5(4)       |
| O15         | S13         | C10         | 108.5(2)       | C12         | C7          | C1          | 120.4(4)       |
| O15         | S13         | C16         | 108.6(3)       | C5          | C6          | C1          | 110.3(4)       |
| C16         | S13         | C10         | 103.8(2)       | C8          | C9          | C10         | 120.6(4)       |
| C3          | O4          | C5          | 113.9(3)       | C22         | C17         | C5          | 119.3(5)       |
| C3          | O2          | C1          | 114.9(4)       | C22         | C17         | C18         | 118.9(5)       |
| O4          | C5          | C6          | 108.8(4)       | C18         | C17         | C5          | 121.8(5)       |
| O4          | C5          | C17         | 105.8(3)       | C9          | C8          | C7          | 120.6(4)       |
| C6          | C5          | C17         | 116.2(4)       | C11         | C12         | C7          | 121.3(5)       |
| O4          | C3          | C24         | 112.4(4)       | O2          | C1          | C7          | 107.3(4)       |
| O4          | C3          | C23         | 105.2(4)       | O2          | C1          | C6          | 109.4(3)       |
| O2          | C3          | O4          | 110.5(3)       | C7          | C1          | C6          | 111.8(4)       |
| O2          | C3          | C24         | 111.3(3)       | C17         | C22         | C21         | 121.3(6)       |
| O2          | C3          | C23         | 104.9(4)       | C20         | C21         | C22         | 120.0(6)       |
| C23         | C3          | C24         | 112.2(5)       | C19         | C18         | C17         | 119.9(6)       |
| C11         | C10         | S13         | 120.5(3)       | C21         | C20         | C19         | 120.0(5)       |
| C11         | C10         | C9          | 120.1(4)       | C20         | C19         | C18         | 119.9(6)       |
| C9          | C10         | S13         | 119.4(4)       |             |             |             |                |

**Table S21: Hydrogen Atom Coordinates ( $\text{\AA}\times 10^4$ ) and Isotropic Displacement Parameters ( $\text{\AA}^2\times 10^3$ ) for 10b.**

| Atom | <i>x</i> | <i>y</i> | <i>z</i> | U(eq) |
|------|----------|----------|----------|-------|
| H5   | 7805.46  | 4195.84  | 8160.48  | 69    |
| H11  | 7084.52  | 4929.35  | 3494.68  | 80    |
| H6A  | 5994.2   | 4760.91  | 5954.99  | 75    |
| H6B  | 6840.7   | 3592.92  | 6303.24  | 75    |
| H9   | 5110.59  | 7945.88  | 3011.84  | 75    |
| H8   | 5780.1   | 7617.06  | 4800.84  | 75    |
| H12  | 7773.43  | 4606.39  | 5306.26  | 80    |
| H1   | 8016.26  | 5541.73  | 6904.5   | 71    |
| H24A | 8869.76  | 6976.31  | 9519.37  | 117   |
| H24B | 9003.12  | 7761.09  | 8741.4   | 117   |
| H24C | 8873.34  | 5998.88  | 8701.96  | 117   |
| H22  | 7734.01  | 2766.8   | 9325.3   | 85    |
| H23A | 6424.15  | 8688.05  | 7407.78  | 118   |
| H23B | 7488.58  | 9433.31  | 7995.32  | 118   |
| H23C | 7296.86  | 8596.74  | 8708.87  | 118   |
| H21  | 6910.08  | 1119.68  | 9617.5   | 106   |
| H18  | 5088.63  | 3763.25  | 6310.25  | 98    |
| H20  | 5192.55  | 728.73   | 8248.05  | 105   |
| H16A | 4083.04  | 5574.3   | 153.65   | 121   |
| H16B | 3997.2   | 5740.81  | 1067.06  | 121   |
| H16C | 4686.44  | 4468.74  | 1177.47  | 121   |
| H19  | 4261.1   | 2109.19  | 6610.92  | 114   |

### Crystal structure determination of 10b

**Crystal Data** for  $\text{C}_{19}\text{H}_{22}\text{O}_4\text{S}$  ( $M=346.42$  g/mol): monoclinic, space group C2 (no. 5),  $a = 17.440(2)$   $\text{\AA}$ ,  $b = 8.8300(4)$   $\text{\AA}$ ,  $c = 15.9598(19)$   $\text{\AA}$ ,  $\beta = 131.37(2)^\circ$ ,  $V = 1844.5(5)$   $\text{\AA}^3$ ,  $Z = 4$ ,  $T = 298.58(10)$  K,  $\mu(\text{Cu K}\alpha) = 1.715$   $\text{mm}^{-1}$ ,  $D_{\text{calc}} = 1.247$   $\text{g/cm}^3$ , 10747 reflections measured ( $7.38^\circ \leq 2\theta \leq 133.148^\circ$ ), 3197 unique ( $R_{\text{int}} = 0.0574$ ,  $R_{\text{sigma}} = 0.0474$ ) which were used in all calculations. The final  $R_1$  was 0.0489 ( $I > 2\sigma(I)$ ) and  $wR_2$  was 0.1409 (all data).

## 7.4 X-Ray Crystallographic Analysis of 9i

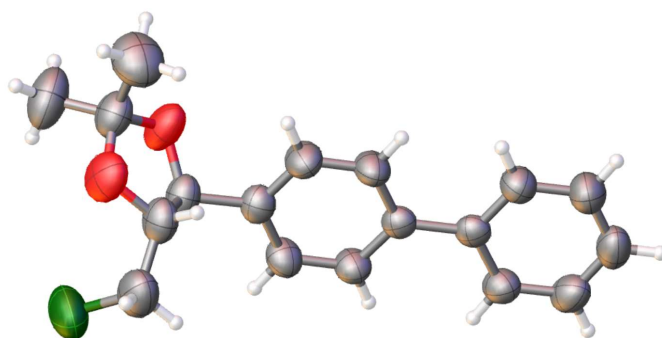

CCDC: 2236741

Supplementary Figure 98. Structure of compound 9i

Table S22: Crystal data and structure refinement for 9i.

|                                        |                                                                |
|----------------------------------------|----------------------------------------------------------------|
| Empirical formula                      | C <sub>18</sub> H <sub>19</sub> ClO <sub>2</sub>               |
| Formula weight                         | 302.78                                                         |
| Temperature/K                          | 300.62(10)                                                     |
| Crystal system                         | monoclinic                                                     |
| Space group                            | P2 <sub>1</sub>                                                |
| a/Å                                    | 5.9444(4)                                                      |
| b/Å                                    | 7.6111(6)                                                      |
| c/Å                                    | 17.7601(11)                                                    |
| $\alpha$ /°                            | 90                                                             |
| $\beta$ /°                             | 98.633(6)                                                      |
| $\gamma$ /°                            | 90                                                             |
| Volume/Å <sup>3</sup>                  | 794.43(10)                                                     |
| Z                                      | 2                                                              |
| $\rho_{\text{calc}}/\text{cm}^3$       | 1.266                                                          |
| $\mu/\text{mm}^{-1}$                   | 2.135                                                          |
| F(000)                                 | 320.0                                                          |
| Crystal size/mm <sup>3</sup>           | 0.2 × 0.1 × 0.05                                               |
| Radiation                              | Cu K $\alpha$ ( $\lambda$ = 1.54184)                           |
| 2 $\theta$ range for data collection/° | 5.032 to 152.182                                               |
| Index ranges                           | -7 ≤ h ≤ 6, -9 ≤ k ≤ 8, -21 ≤ l ≤ 22                           |
| Reflections collected                  | 6998                                                           |
| Independent reflections                | 2859 [ $R_{\text{int}}$ = 0.0286, $R_{\text{sigma}}$ = 0.0321] |

|                                                |                                  |
|------------------------------------------------|----------------------------------|
| Data/restraints/parameters                     | 2859/1/192                       |
| Goodness-of-fit on $F^2$                       | 1.044                            |
| Final R indexes [ $I \geq 2\sigma(I)$ ]        | $R_1 = 0.0410$ , $wR_2 = 0.1107$ |
| Final R indexes [all data]                     | $R_1 = 0.0548$ , $wR_2 = 0.1187$ |
| Largest diff. peak/hole / $e \text{ \AA}^{-3}$ | 0.14/-0.28                       |
| Flack parameter                                | 0.026(11)                        |

**Table S23: Fractional Atomic Coordinates ( $\times 10^4$ ) and Equivalent Isotropic Displacement Parameters ( $\text{\AA}^2 \times 10^3$ ) for 9i.  $U_{eq}$  is defined as 1/3 of the trace of the orthogonalised  $U_{ij}$  tensor.**

| Atom | $x$      | $y$     | $z$        | $U(eq)$   |
|------|----------|---------|------------|-----------|
| Cl13 | 8829(2)  | 7628(2) | 8762.7(7)  | 128.4(6)  |
| O11  | 5523(5)  | 2913(4) | 8166.7(13) | 86.1(8)   |
| O9   | 4937(5)  | 5136(4) | 8972.9(14) | 93.2(9)   |
| C4   | 3044(5)  | 4455(4) | 5413.2(16) | 48.2(6)   |
| C16  | 1969(5)  | 4465(4) | 4604.3(17) | 49.2(6)   |
| C5   | 5141(5)  | 5212(5) | 5659.9(17) | 58.9(8)   |
| C6   | 6097(5)  | 5211(5) | 6417.3(18) | 62.0(8)   |
| C1   | 4992(5)  | 4436(4) | 6969.0(17) | 56.4(7)   |
| C21  | 2985(6)  | 5302(5) | 4032.9(18) | 63.5(8)   |
| C3   | 1964(5)  | 3668(5) | 5969.3(19) | 66.2(9)   |
| C17  | -108(5)  | 3637(5) | 4365.1(19) | 64.9(8)   |
| C7   | 5974(5)  | 4498(5) | 7801.4(17) | 64.6(8)   |
| C19  | -95(6)   | 4487(5) | 3072(2)    | 73.7(10)  |
| C20  | 1958(7)  | 5306(5) | 3286.0(19) | 74.1(10)  |
| C2   | 2914(6)  | 3658(5) | 6725(2)    | 69.4(9)   |
| C8   | 4856(7)  | 5884(5) | 8244.5(19) | 72.4(10)  |
| C10  | 5035(6)  | 3259(6) | 8913.4(19) | 76.9(11)  |
| C18  | -1116(6) | 3646(6) | 3612(2)    | 77.9(10)  |
| C12  | 5954(8)  | 7673(7) | 8305(2)    | 97.3(13)  |
| C15  | 6902(8)  | 2617(9) | 9501(2)    | 114.6(17) |
| C14  | 2775(8)  | 2476(9) | 8992(3)    | 122.7(18) |



**Table S24: Anisotropic Displacement Parameters ( $\text{\AA}^2 \times 10^3$ ) for 9i. The Anisotropic displacement factor exponent takes the form:  $-2\pi^2[h^2a^{*2}U_{11}+2hka^*b^*U_{12}+\dots]$ .**

| Atom | $U_{11}$  | $U_{22}$  | $U_{33}$ | $U_{23}$  | $U_{13}$ | $U_{12}$  |
|------|-----------|-----------|----------|-----------|----------|-----------|
| Cl13 | 141.3(10) | 158.9(13) | 76.6(7)  | -10.8(8)  | -10.7(6) | -54.0(10) |
| O11  | 131(2)    | 79.2(18)  | 50.3(12) | 4.9(12)   | 19.6(12) | 21.0(16)  |
| O9   | 128(2)    | 101(2)    | 54.9(14) | -12.3(14) | 28.3(14) | 6.6(18)   |
| C4   | 55.0(16)  | 42.7(14)  | 48.5(15) | -3.9(13)  | 12.9(12) | 0.7(13)   |
| C16  | 56.7(16)  | 40.2(14)  | 52.3(16) | -4.5(13)  | 13.2(12) | 1.8(14)   |
| C5   | 57.6(18)  | 67.0(19)  | 54.5(17) | -1.0(16)  | 15.6(13) | -12.2(16) |
| C6   | 51.3(17)  | 77(2)     | 58.3(18) | -6.9(18)  | 11.0(13) | -8.2(17)  |
| C1   | 59.7(17)  | 60.1(18)  | 50.4(16) | -5.2(15)  | 11.7(13) | 6.3(16)   |
| C21  | 73(2)     | 62(2)     | 57.3(18) | -1.1(17)  | 14.9(15) | -11.7(18) |
| C3   | 66.3(19)  | 76(2)     | 56(2)    | -0.2(17)  | 10.3(15) | -25.3(18) |
| C17  | 63.9(19)  | 71(2)     | 59(2)    | 1.5(16)   | 7.1(15)  | -11.4(18) |
| C7   | 68.2(19)  | 78(2)     | 47.9(16) | -2.0(16)  | 9.6(14)  | 10.1(18)  |
| C19  | 93(2)     | 69(2)     | 54.4(19) | -5.6(18)  | -5.3(17) | 5(2)      |
| C20  | 105(3)    | 64(2)     | 54.8(19) | -0.3(19)  | 19.1(18) | -6(2)     |
| C2   | 76(2)     | 83(2)     | 51.9(18) | 3.7(17)   | 17.0(15) | -21(2)    |
| C8   | 85(2)     | 84(3)     | 48.9(18) | -9.9(17)  | 10.6(15) | 6(2)      |
| C10  | 85(2)     | 95(3)     | 51.8(19) | 4.5(18)   | 14.0(16) | 7(2)      |
| C18  | 81(2)     | 86(3)     | 63(2)    | 0.2(19)   | -0.5(17) | -15(2)    |
| C12  | 132(3)    | 88(3)     | 69(2)    | -12(2)    | 5(2)     | -2(3)     |
| C15  | 103(3)    | 173(5)    | 67(2)    | 19(3)     | 6(2)     | 23(4)     |
| C14  | 100(3)    | 154(5)    | 118(4)   | -8(4)     | 29(3)    | -25(4)    |

**Table S25: bond Lengths for 9i.**

| <b>Atom</b> | <b>Atom</b> | <b>Length/Å</b> | <b>Atom</b> | <b>Atom</b> | <b>Length/Å</b> |
|-------------|-------------|-----------------|-------------|-------------|-----------------|
| C113        | C12         | 1.779(5)        | C1          | C7          | 1.506(4)        |
| O11         | C7          | 1.414(5)        | C1          | C2          | 1.380(5)        |
| O11         | C10         | 1.424(4)        | C21         | C20         | 1.375(5)        |
| O9          | C8          | 1.408(4)        | C3          | C2          | 1.376(5)        |
| O9          | C10         | 1.434(5)        | C17         | C18         | 1.381(5)        |
| C4          | C16         | 1.482(4)        | C7          | C8          | 1.527(5)        |
| C4          | C5          | 1.383(4)        | C19         | C20         | 1.372(5)        |
| C4          | C3          | 1.392(4)        | C19         | C18         | 1.369(5)        |
| C16         | C21         | 1.409(4)        | C8          | C12         | 1.507(6)        |
| C16         | C17         | 1.394(5)        | C10         | C15         | 1.487(6)        |
| C5          | C6          | 1.379(4)        | C10         | C14         | 1.495(6)        |
| C6          | C1          | 1.390(4)        |             |             |                 |

**Table S26: Bond Angles for 9i.**

| <b>Atom</b> | <b>Atom</b> | <b>Atom</b> | <b>Angle/°</b> | <b>Atom</b> | <b>Atom</b> | <b>Atom</b> | <b>Angle/°</b> |
|-------------|-------------|-------------|----------------|-------------|-------------|-------------|----------------|
| C7          | O11         | C10         | 110.4(3)       | O11         | C7          | C8          | 103.1(2)       |
| C8          | O9          | C10         | 109.3(3)       | C1          | C7          | C8          | 113.1(3)       |
| C5          | C4          | C16         | 122.8(2)       | C18         | C19         | C20         | 119.1(3)       |
| C5          | C4          | C3          | 116.4(3)       | C19         | C20         | C21         | 121.0(3)       |
| C3          | C4          | C16         | 120.8(3)       | C3          | C2          | C1          | 121.4(3)       |
| C21         | C16         | C4          | 122.1(3)       | O9          | C8          | C7          | 103.7(3)       |
| C17         | C16         | C4          | 121.8(3)       | O9          | C8          | C12         | 110.2(3)       |
| C17         | C16         | C21         | 116.1(3)       | C12         | C8          | C7          | 116.3(3)       |
| C6          | C5          | C4          | 121.9(3)       | O11         | C10         | O9          | 105.6(3)       |
| C5          | C6          | C1          | 121.2(3)       | O11         | C10         | C15         | 111.0(3)       |
| C6          | C1          | C7          | 121.6(3)       | O11         | C10         | C14         | 108.9(4)       |
| C2          | C1          | C6          | 117.1(3)       | O9          | C10         | C15         | 108.1(4)       |
| C2          | C1          | C7          | 121.2(3)       | O9          | C10         | C14         | 110.0(4)       |
| C20         | C21         | C16         | 121.3(3)       | C15         | C10         | C14         | 113.0(4)       |
| C2          | C3          | C4          | 122.0(3)       | C19         | C18         | C17         | 120.5(3)       |
| C18         | C17         | C16         | 121.9(3)       | C8          | C12         | C113        | 113.0(3)       |
| O11         | C7          | C1          | 110.6(3)       |             |             |             |                |

**Table S27: Torsion Angles for 9i.**

| A   | B   | C   | D    | Angle/°   | A   | B   | C   | D    | Angle/°   |
|-----|-----|-----|------|-----------|-----|-----|-----|------|-----------|
| O11 | C7  | C8  | O9   | 27.8(4)   | C21 | C16 | C17 | C18  | -0.4(5)   |
| O11 | C7  | C8  | C12  | 148.9(3)  | C3  | C4  | C16 | C21  | 177.8(4)  |
| O9  | C8  | C12 | C113 | 57.7(4)   | C3  | C4  | C16 | C17  | -2.4(4)   |
| C4  | C16 | C21 | C20  | -179.7(3) | C3  | C4  | C5  | C6   | -0.9(5)   |
| C4  | C16 | C17 | C18  | 179.9(3)  | C17 | C16 | C21 | C20  | 0.6(5)    |
| C4  | C5  | C6  | C1   | 0.3(5)    | C7  | O11 | C10 | O9   | 6.5(4)    |
| C4  | C3  | C2  | C1   | 0.1(6)    | C7  | O11 | C10 | C15  | -110.4(4) |
| C16 | C4  | C5  | C6   | 179.0(3)  | C7  | O11 | C10 | C14  | 124.7(4)  |
| C16 | C4  | C3  | C2   | -179.2(3) | C7  | C1  | C2  | C3   | 177.1(3)  |
| C16 | C21 | C20 | C19  | -0.2(6)   | C7  | C8  | C12 | C113 | -59.9(4)  |
| C16 | C17 | C18 | C19  | -0.3(6)   | C20 | C19 | C18 | C17  | 0.7(6)    |
| C5  | C4  | C16 | C21  | -2.2(4)   | C2  | C1  | C7  | O11  | 38.5(4)   |
| C5  | C4  | C16 | C17  | 177.6(4)  | C2  | C1  | C7  | C8   | -76.5(4)  |
| C5  | C4  | C3  | C2   | 0.7(5)    | C8  | O9  | C10 | O11  | 12.7(4)   |
| C5  | C6  | C1  | C7   | -177.3(3) | C8  | O9  | C10 | C15  | 131.5(3)  |
| C5  | C6  | C1  | C2   | 0.5(5)    | C8  | O9  | C10 | C14  | -104.8(4) |
| C6  | C1  | C7  | O11  | -143.8(3) | C10 | O11 | C7  | C1   | -142.3(3) |
| C6  | C1  | C7  | C8   | 101.2(4)  | C10 | O11 | C7  | C8   | -21.1(4)  |
| C6  | C1  | C2  | C3   | -0.8(6)   | C10 | O9  | C8  | C7   | -25.1(4)  |
| C1  | C7  | C8  | O9   | 147.2(3)  | C10 | O9  | C8  | C12  | -150.2(4) |
| C1  | C7  | C8  | C12  | -91.6(4)  | C18 | C19 | C20 | C21  | -0.5(6)   |

**Table S28: Hydrogen Atom Coordinates ( $\text{\AA}\times 10^4$ ) and Isotropic Displacement Parameters ( $\text{\AA}^2\times 10^3$ ) for 9i.**

| Atom | <i>x</i> | <i>y</i> | <i>z</i> | U(eq) |
|------|----------|----------|----------|-------|
| H5   | 5928.62  | 5735.98  | 5304.91  | 71    |
| H6   | 7506.9   | 5738.54  | 6561.44  | 74    |
| H21  | 4378.27  | 5863.96  | 4163.69  | 76    |
| H3   | 559.13   | 3132.53  | 5825.83  | 79    |
| H17  | -835.06  | 3061.8   | 4722.98  | 78    |
| H7   | 7618.31  | 4701.39  | 7859.31  | 78    |
| H19  | -784.24  | 4502.86  | 2565.55  | 88    |
| H20  | 2664.28  | 5872.09  | 2920.61  | 89    |
| H2   | 2138.64  | 3115.81  | 7078.91  | 83    |
| H8   | 3259.97  | 6011.37  | 8013.74  | 87    |
| H18  | -2498.79 | 3076.79  | 3471.14  | 94    |
| H12A | 5084.33  | 8444.93  | 8586.53  | 117   |
| H12B | 5904.46  | 8157.17  | 7797.16  | 117   |
| H15A | 7181.28  | 1396.97  | 9413.04  | 172   |
| H15B | 6470.84  | 2757.61  | 9996.92  | 172   |
| H15C | 8258.98  | 3281.06  | 9471.38  | 172   |
| H14A | 1621.95  | 2987.46  | 8619.55  | 184   |
| H14B | 2428.92  | 2708.81  | 9492.91  | 184   |
| H14C | 2823.03  | 1230.1   | 8912.25  | 184   |

### Crystal structure determination of 9i

**Crystal Data** for  $\text{C}_{18}\text{H}_{19}\text{ClO}_2$  ( $M=302.78$  g/mol): monoclinic, space group  $\text{P}2_1$  (no. 4),  $a = 5.9444(4)$   $\text{\AA}$ ,  $b = 7.6111(6)$   $\text{\AA}$ ,  $c = 17.7601(11)$   $\text{\AA}$ ,  $\beta = 98.633(6)^\circ$ ,  $V = 794.43(10)$   $\text{\AA}^3$ ,  $Z = 2$ ,  $T = 300.62(10)$  K,  $\mu(\text{Cu K}\alpha) = 2.135$   $\text{mm}^{-1}$ ,  $D_{\text{calc}} = 1.266$   $\text{g/cm}^3$ , 6998 reflections measured ( $5.032^\circ \leq 2\Theta \leq 152.182^\circ$ ), 2859 unique ( $R_{\text{int}} = 0.0286$ ,  $R_{\text{sigma}} = 0.0321$ ) which were used in all calculations. The final  $R_1$  was 0.0410 ( $I > 2\sigma(I)$ ) and  $wR_2$  was 0.1187 (all data).

## 8. NMR Spectra

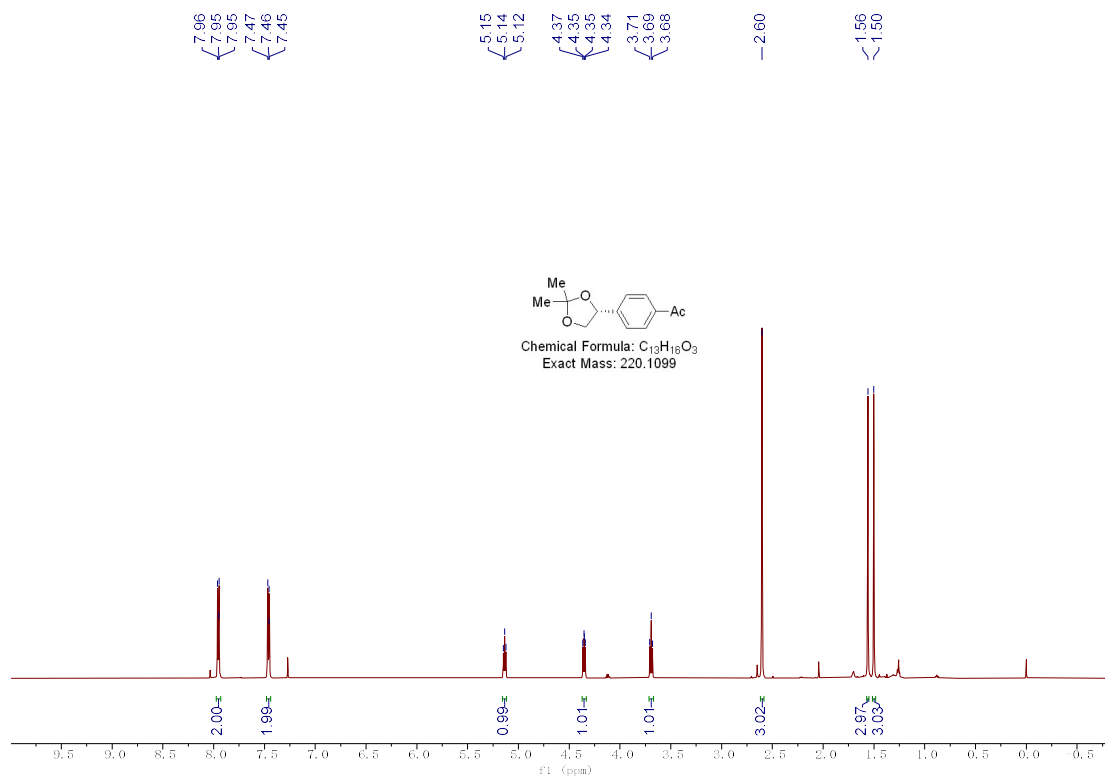

### <sup>1</sup>H NMR (600 MHz, CDCl<sub>3</sub>) Spectrum of 3ca

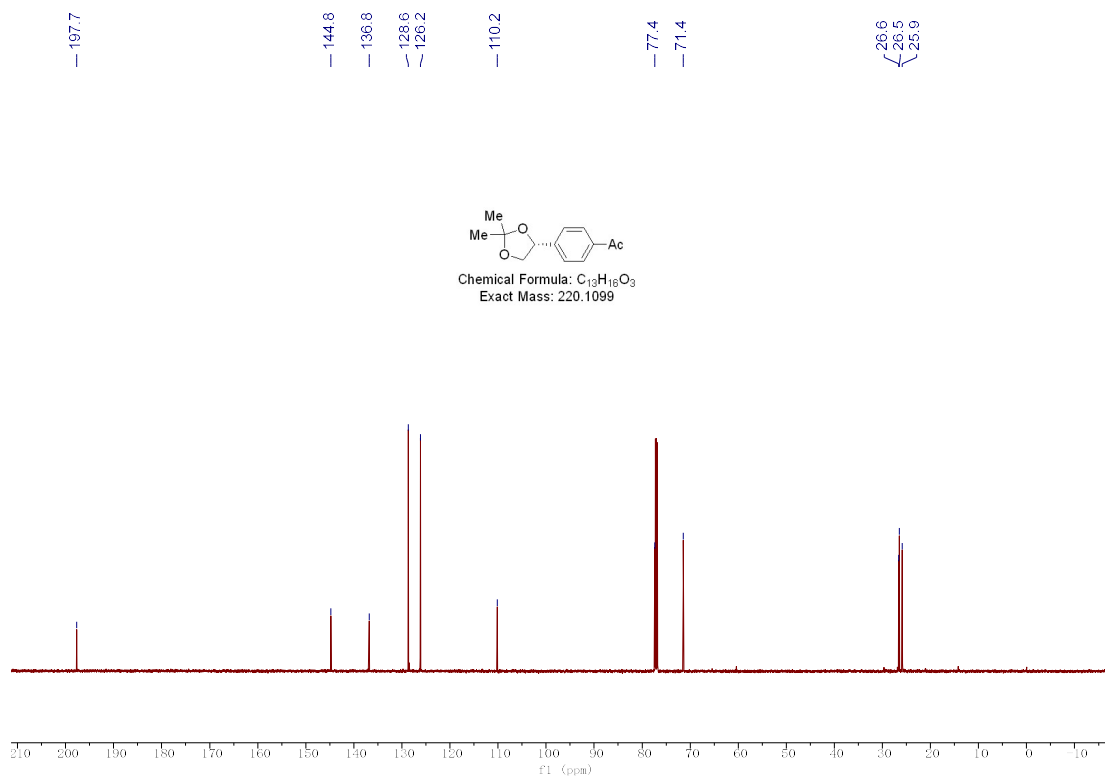

### <sup>13</sup>C NMR (151 MHz, CDCl<sub>3</sub>) Spectrum of 3ca

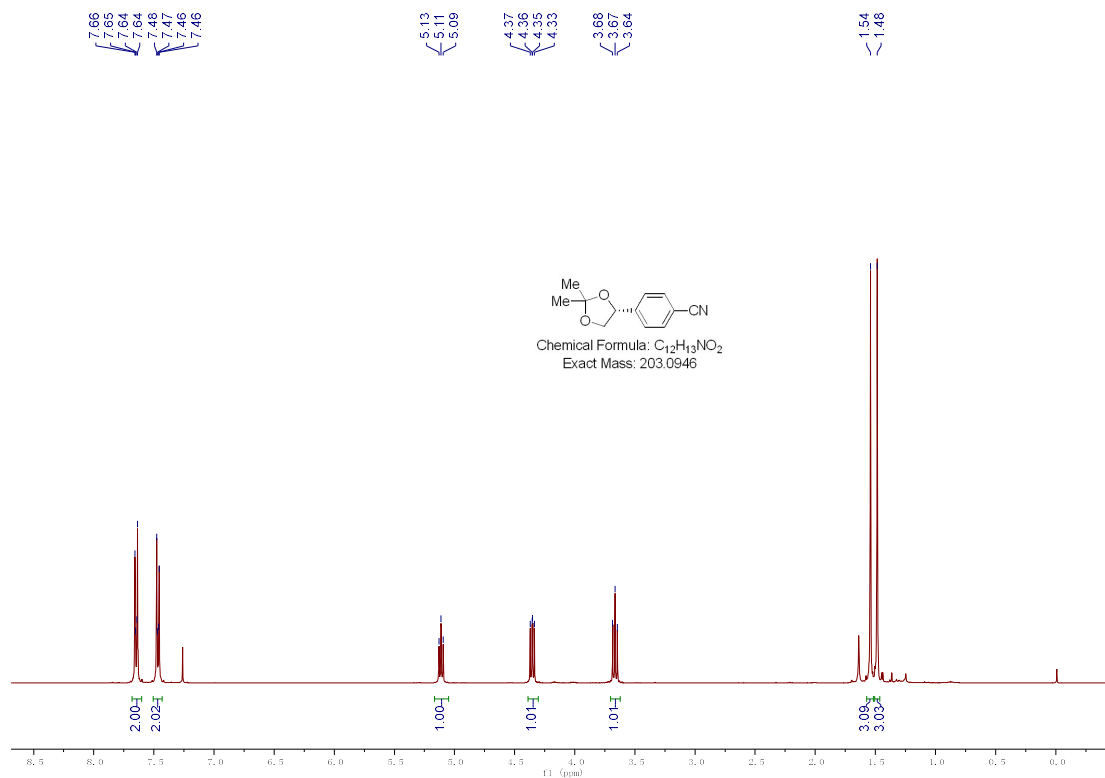

**$^1H$  NMR (400 MHz,  $CDCl_3$ ) Spectrum of 3cb**

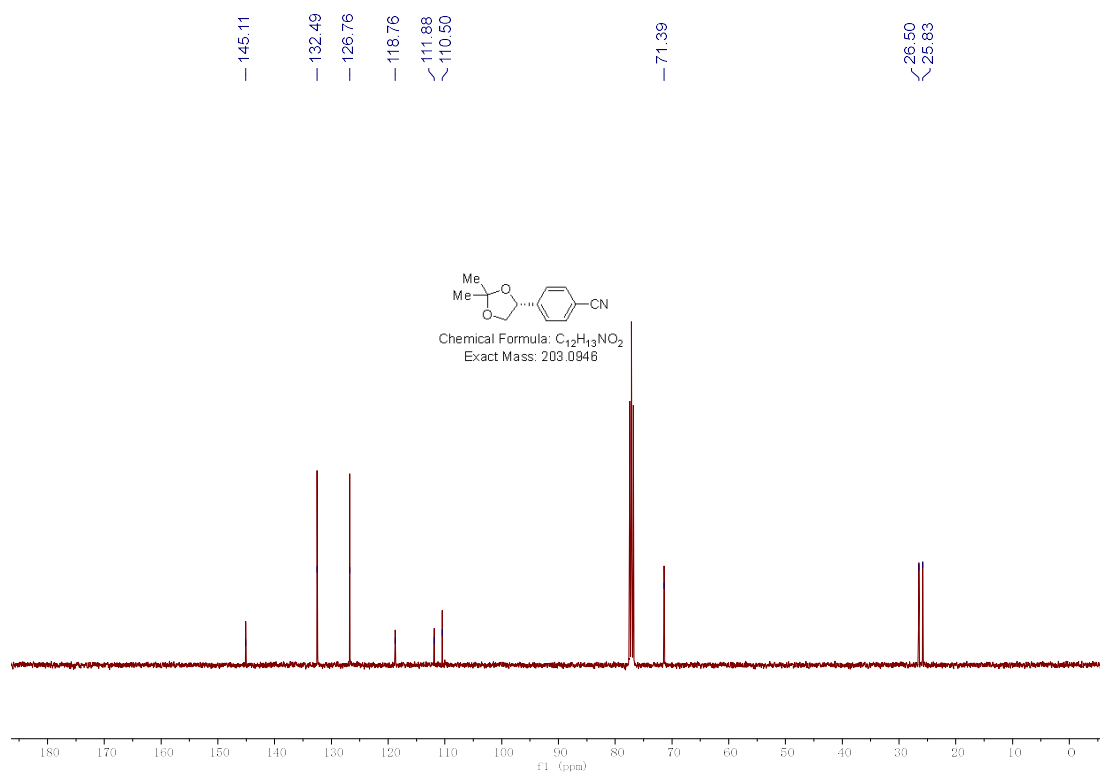

**$^{13}C$  NMR (101 MHz,  $CDCl_3$ ) Spectrum of 3cb**

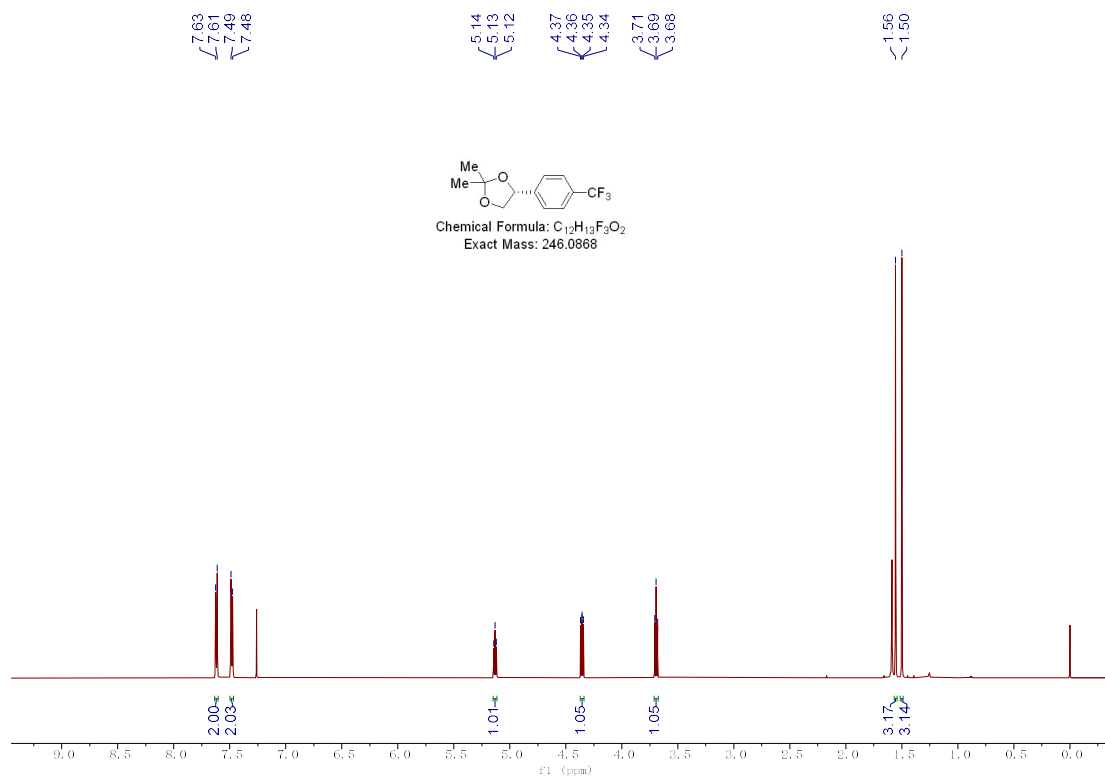

**$^1H$  NMR (600 MHz,  $CDCl_3$ ) Spectrum of 3cc**

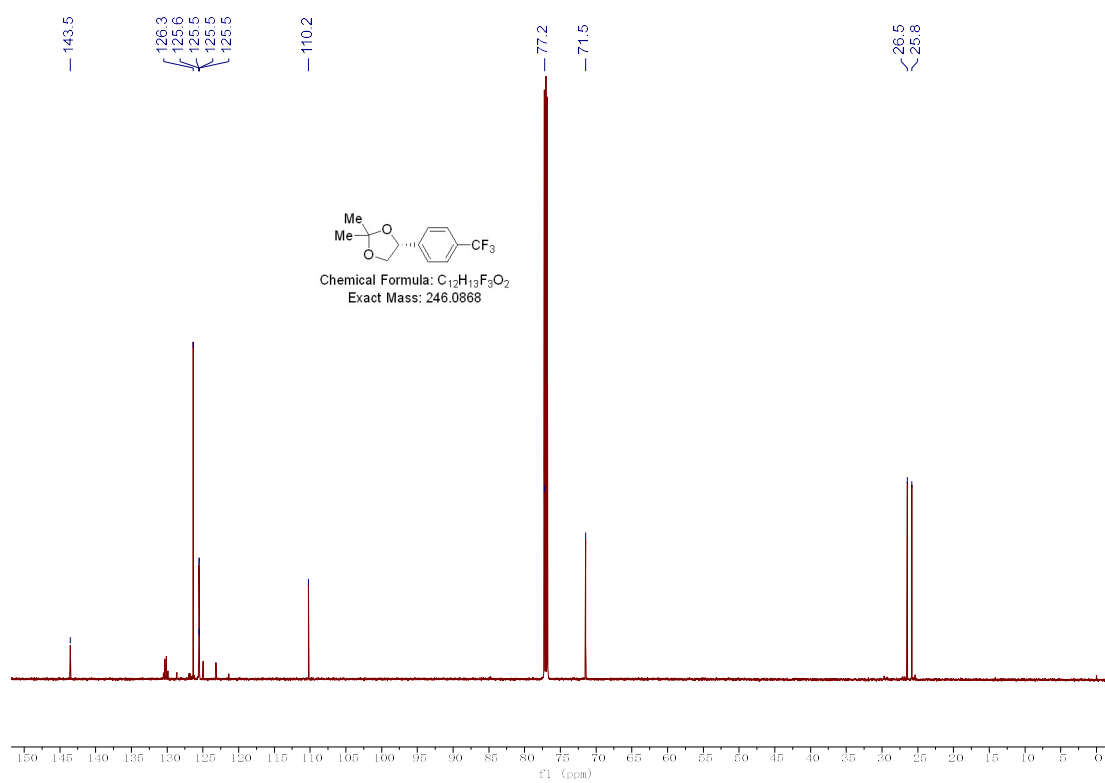

**$^{13}C$  NMR (151 MHz,  $CDCl_3$ ) Spectrum of 3cc**



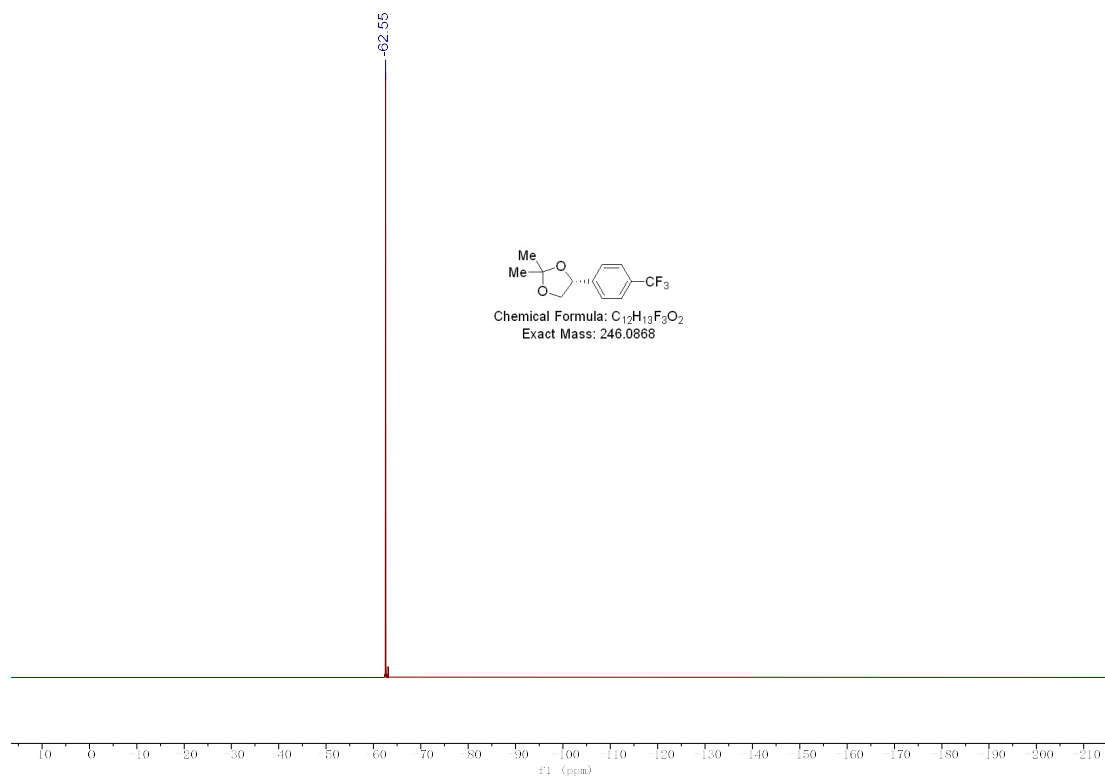

**<sup>19</sup>F NMR (565 MHz, CDCl<sub>3</sub>) Spectrum of 3cc**

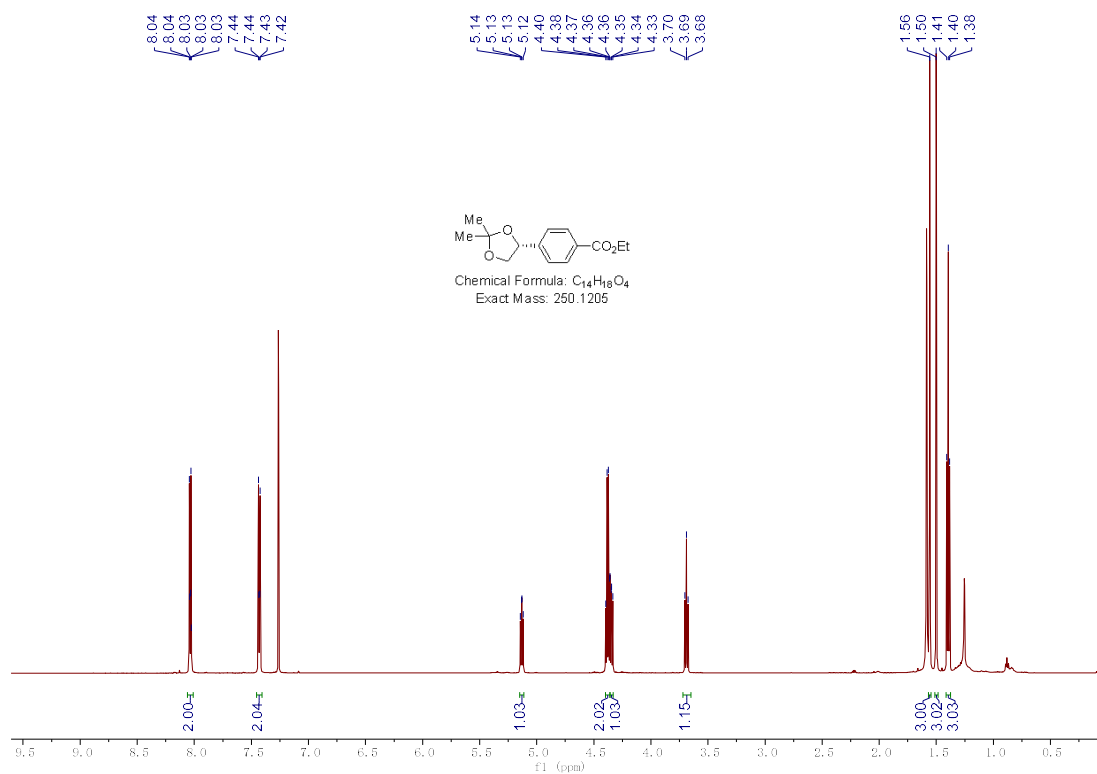

**<sup>1</sup>H NMR (600 MHz, CDCl<sub>3</sub>) Spectrum of 3cd**

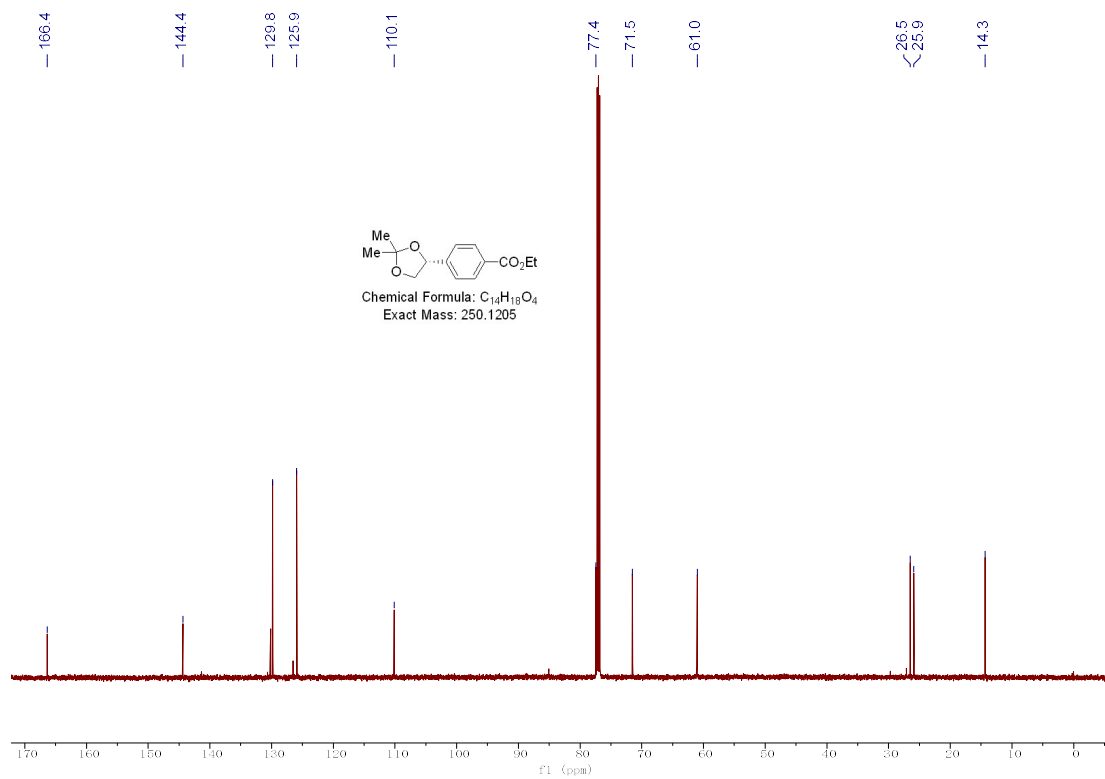

**<sup>13</sup>C NMR (151 MHz, CDCl<sub>3</sub>) Spectrum of 3cd**

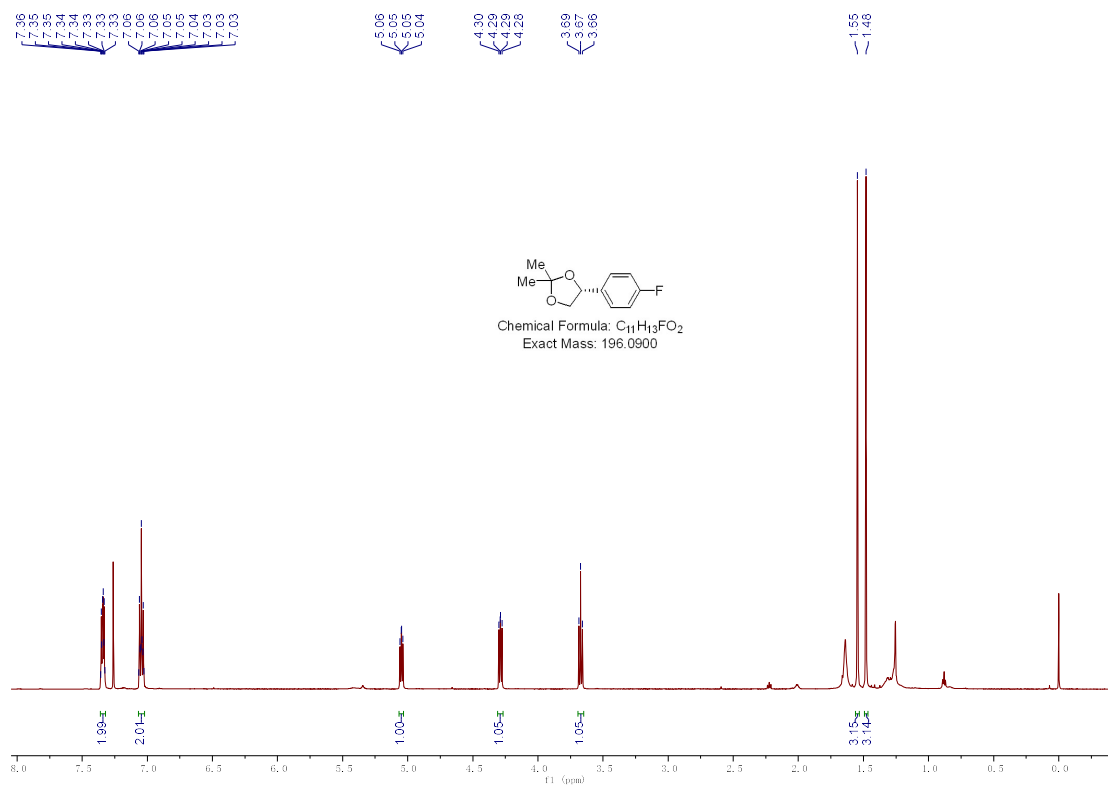

**<sup>1</sup>H NMR (600 MHz, CDCl<sub>3</sub>) Spectrum of 3ce**

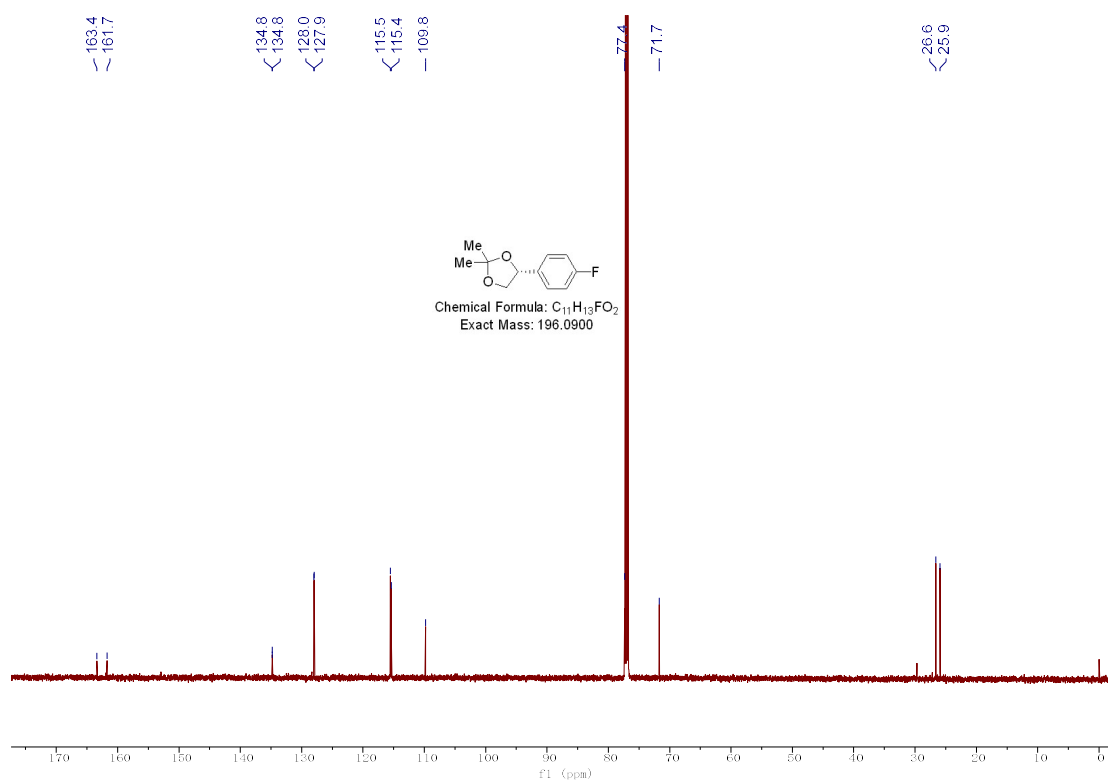

**<sup>13</sup>C NMR (151 MHz, CDCl<sub>3</sub>) Spectrum of 3ce**

-114.30  
-114.31  
-114.31  
-114.32  
-114.33  
-114.34  
-114.35

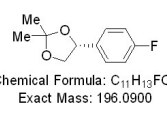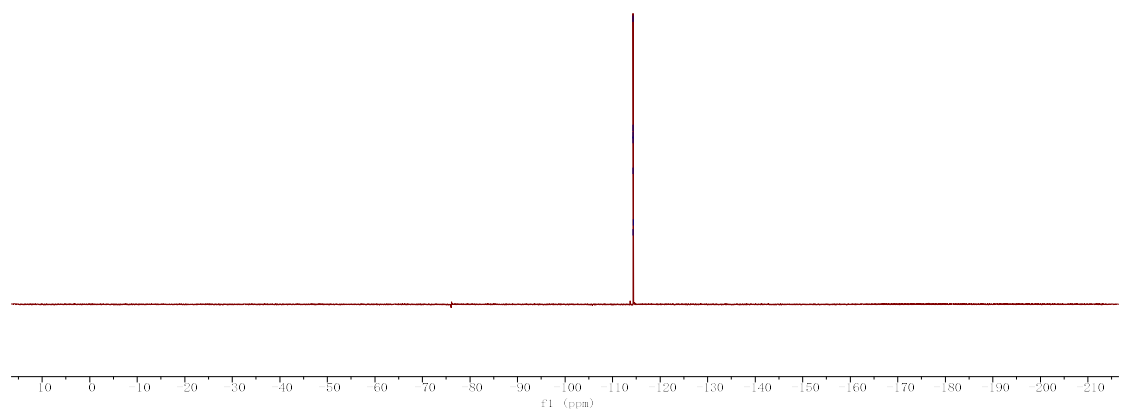

**<sup>19</sup>F NMR (565 MHz, CDCl<sub>3</sub>) Spectrum of 3ce**

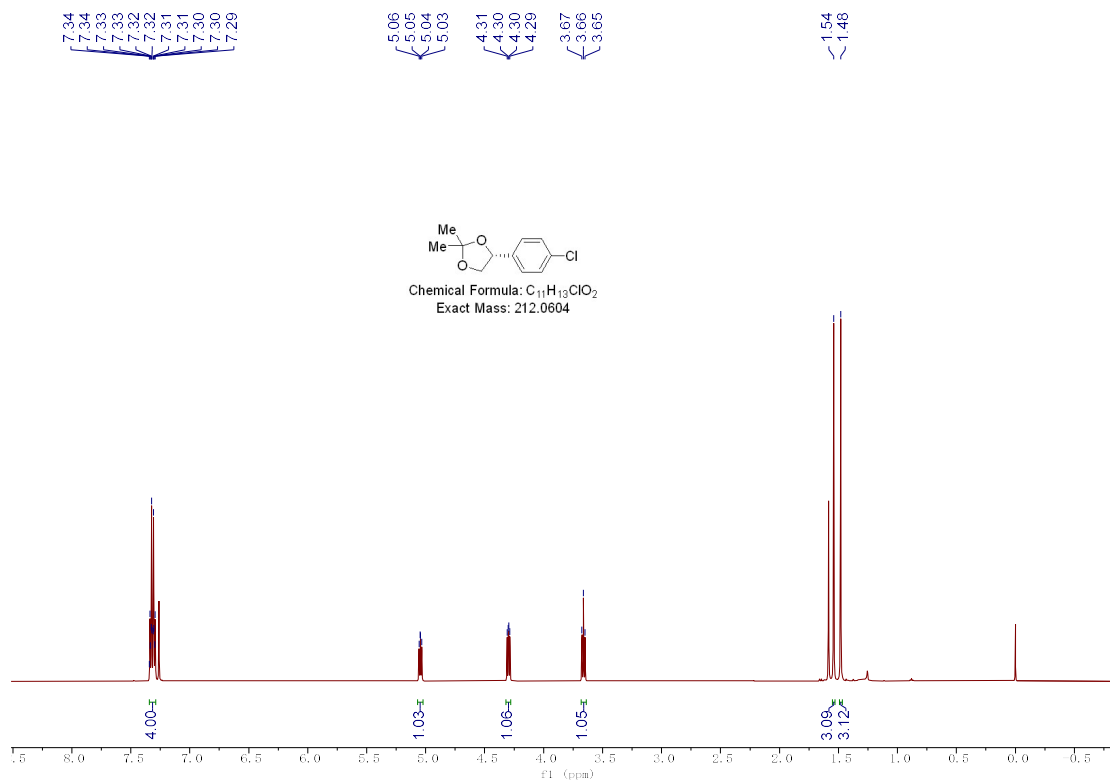

**<sup>1</sup>H NMR (600 MHz, CDCl<sub>3</sub>) Spectrum of 3cf**

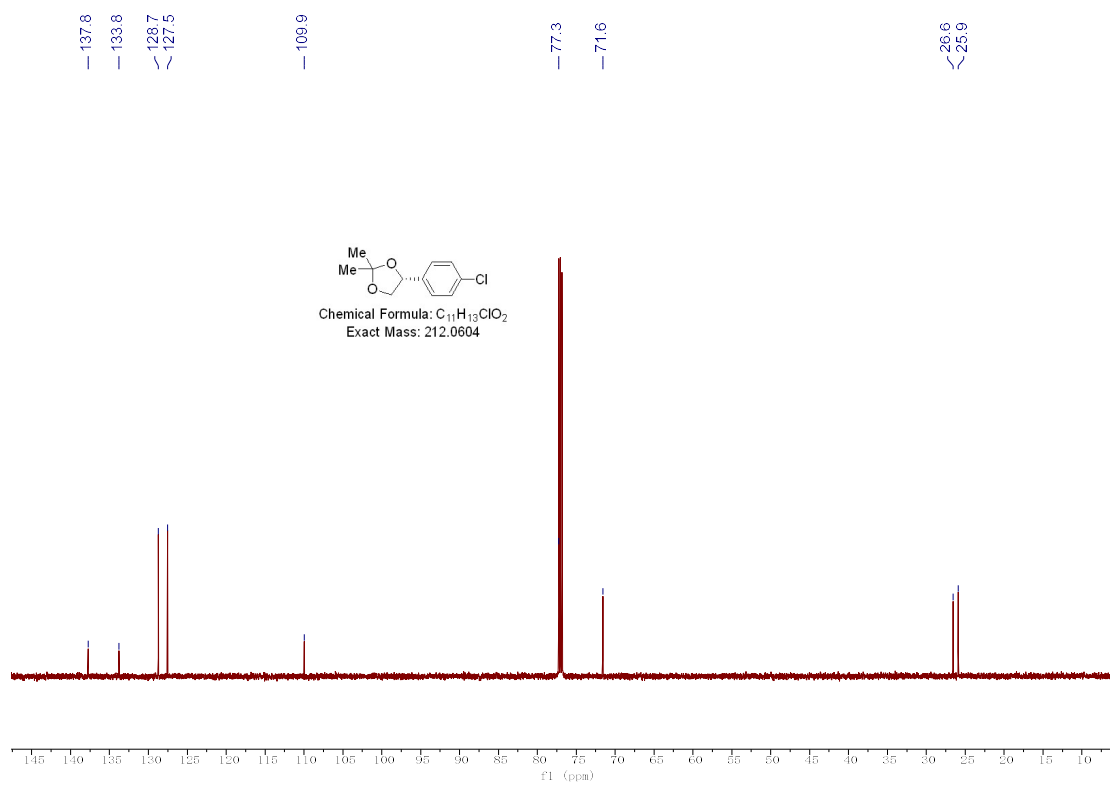

**<sup>13</sup>C NMR (151 MHz, CDCl<sub>3</sub>) Spectrum of 3cf**

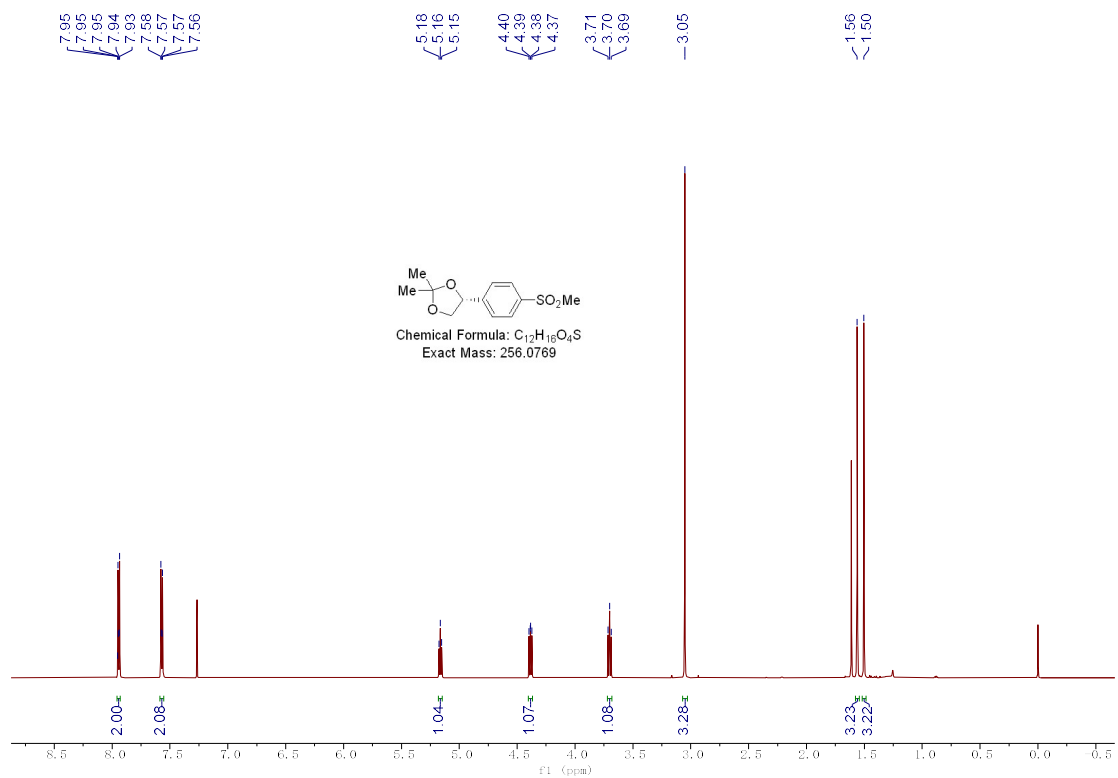

**<sup>1</sup>H NMR (600 MHz, CDCl<sub>3</sub>) Spectrum of 3cg**

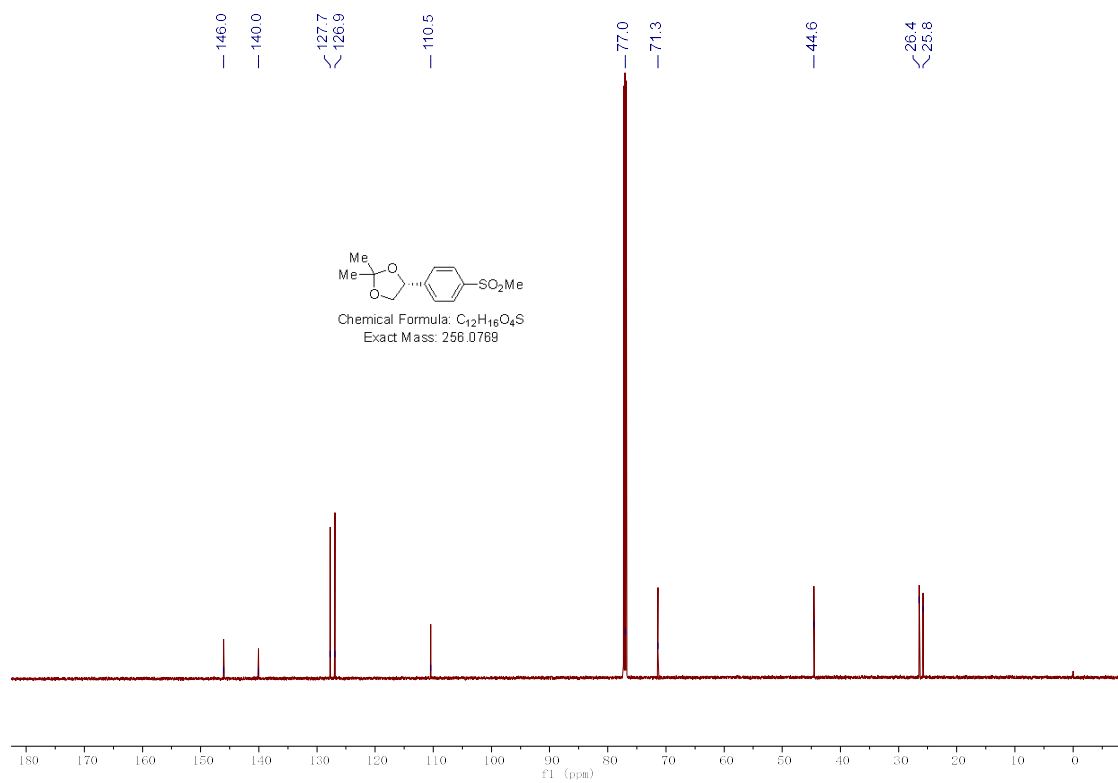

**<sup>13</sup>C NMR (151 MHz, CDCl<sub>3</sub>) Spectrum of 3cg**

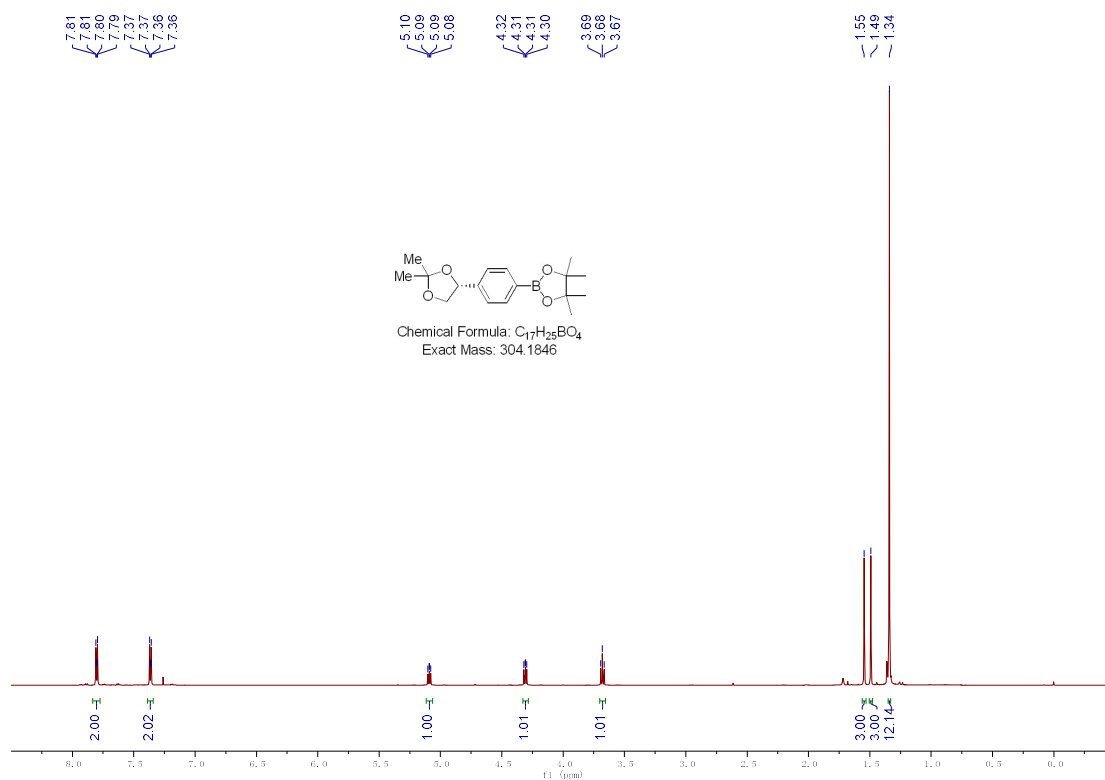

**<sup>1</sup>H NMR (600 MHz, CDCl<sub>3</sub>) Spectrum of 3ch**

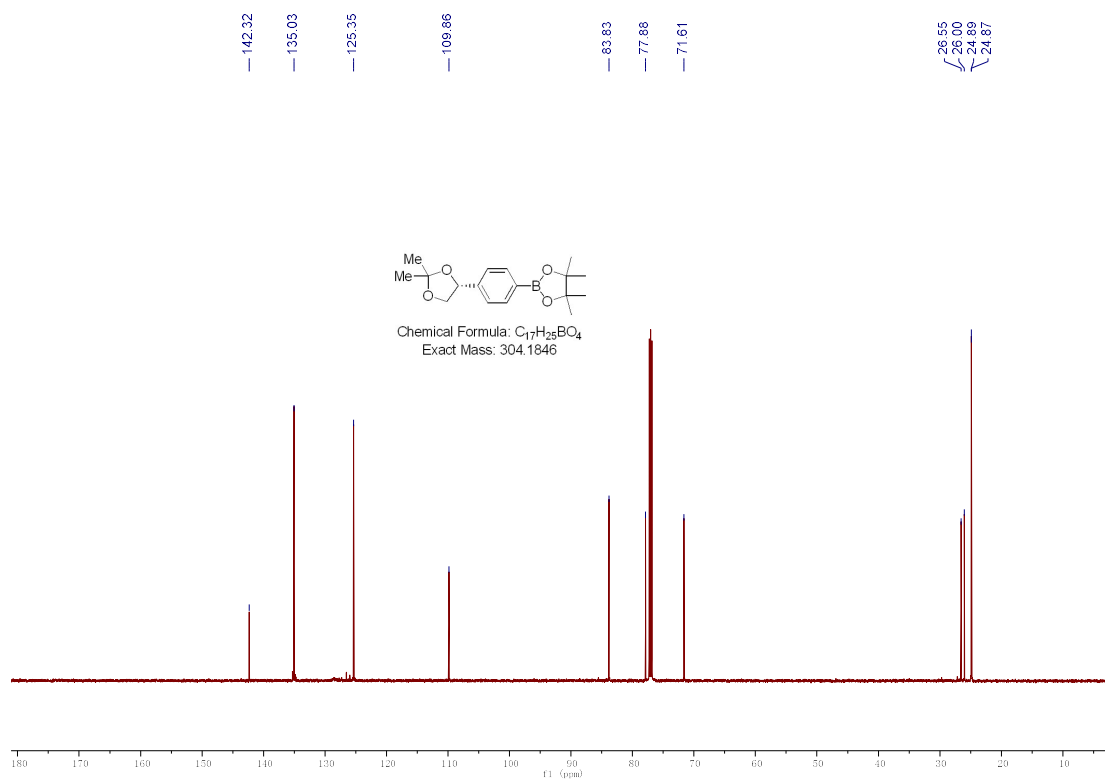

**<sup>13</sup>C NMR (151 MHz, CDCl<sub>3</sub>) Spectrum of 3ch**

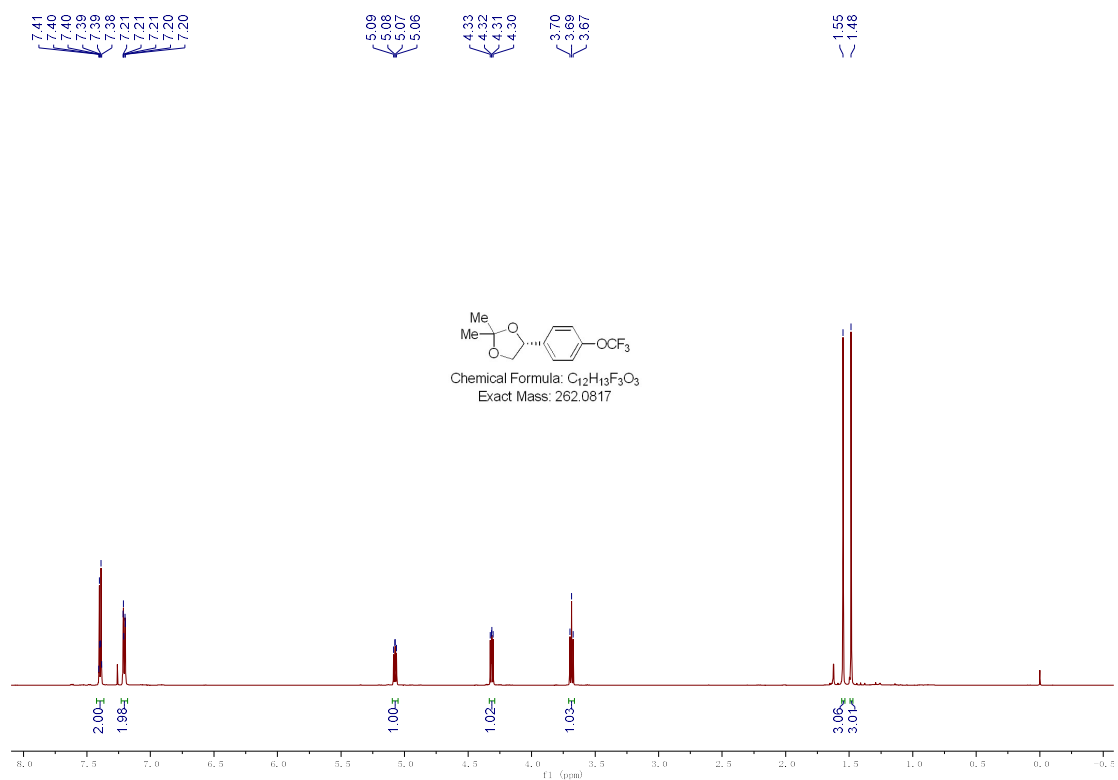

**$^1H$  NMR (600 MHz,  $CDCl_3$ ) Spectrum of 3ci**

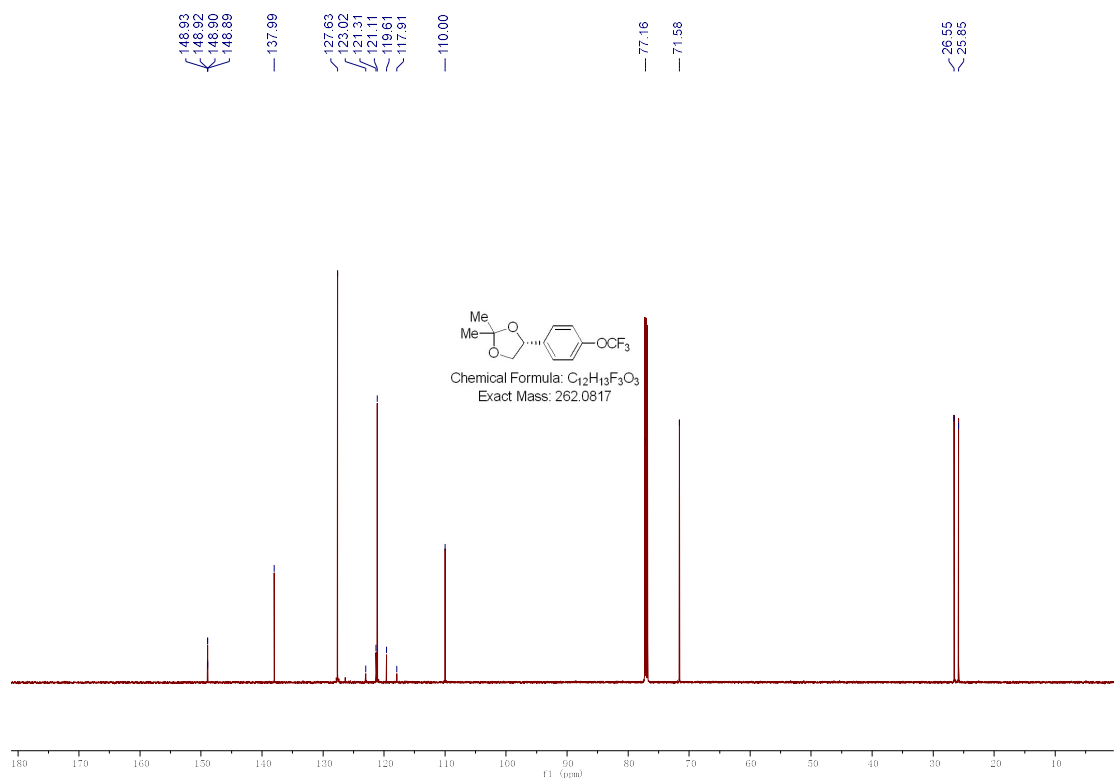

**$^{13}C$  NMR (151 MHz,  $CDCl_3$ ) Spectrum of 3ci**



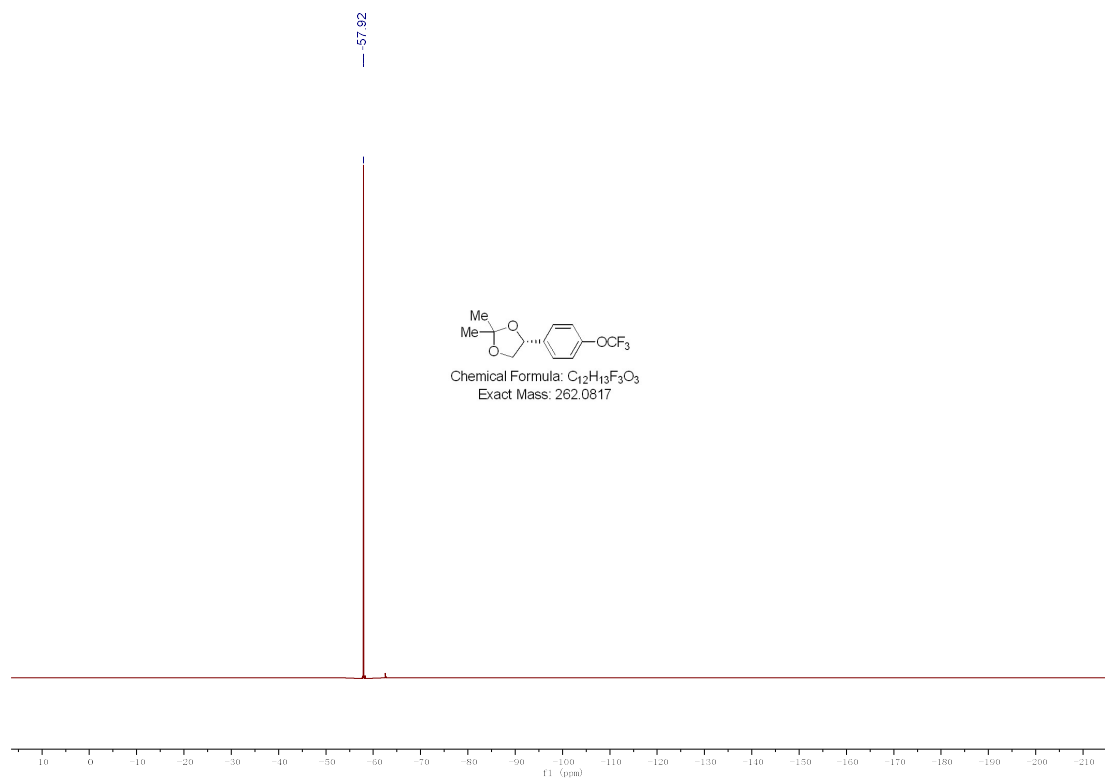

**$^{19}\text{F}$  NMR (565 MHz,  $\text{CDCl}_3$ ) Spectrum of 3ci**

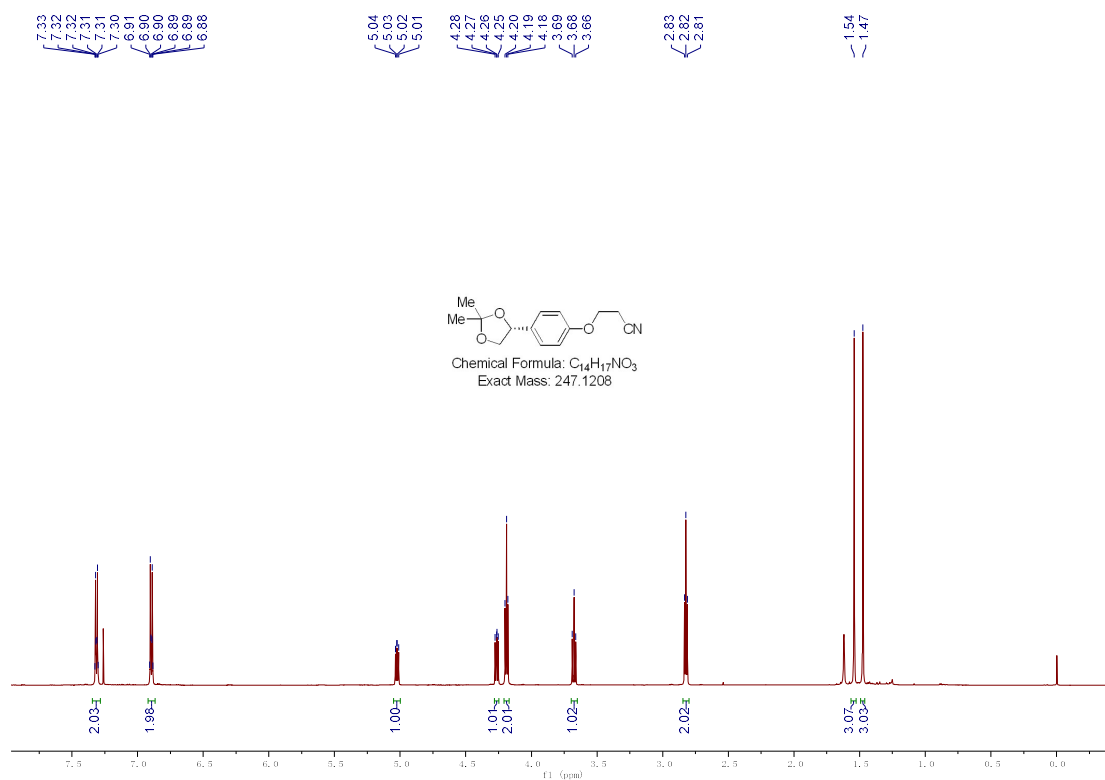

**<sup>1</sup>H NMR (600 MHz, CDCl<sub>3</sub>) Spectrum of 3cj**

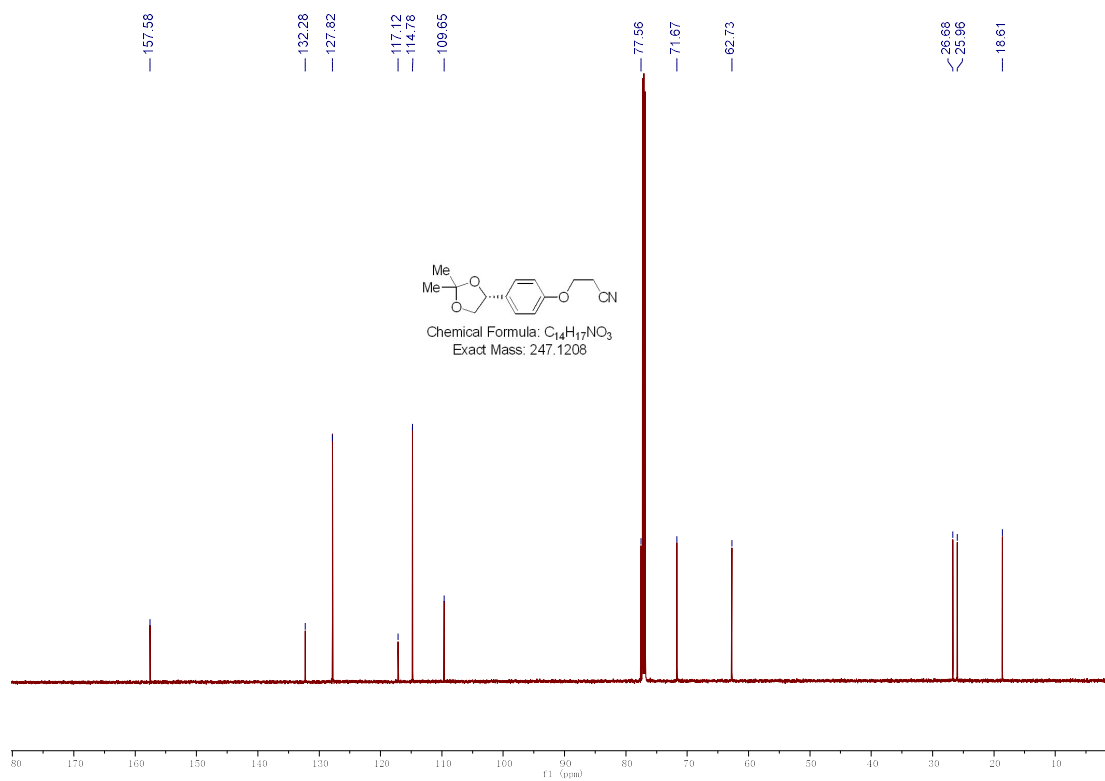

**<sup>13</sup>C NMR (151 MHz, CDCl<sub>3</sub>) Spectrum of 3cj**

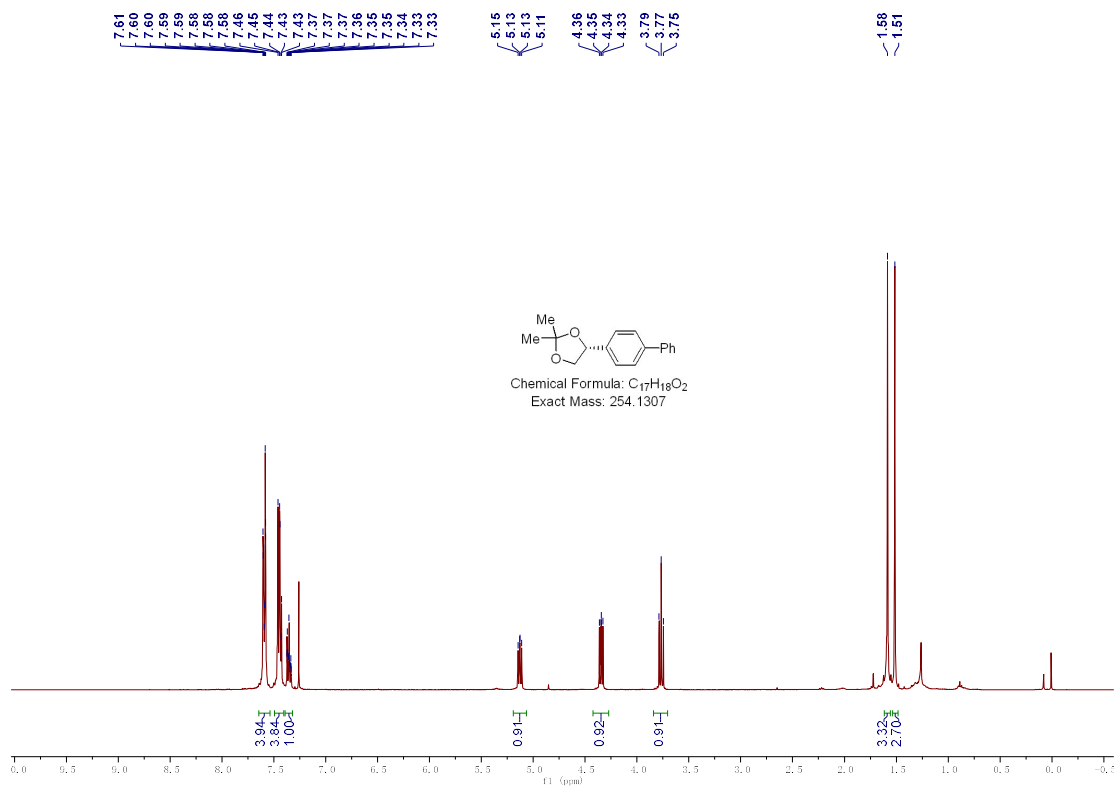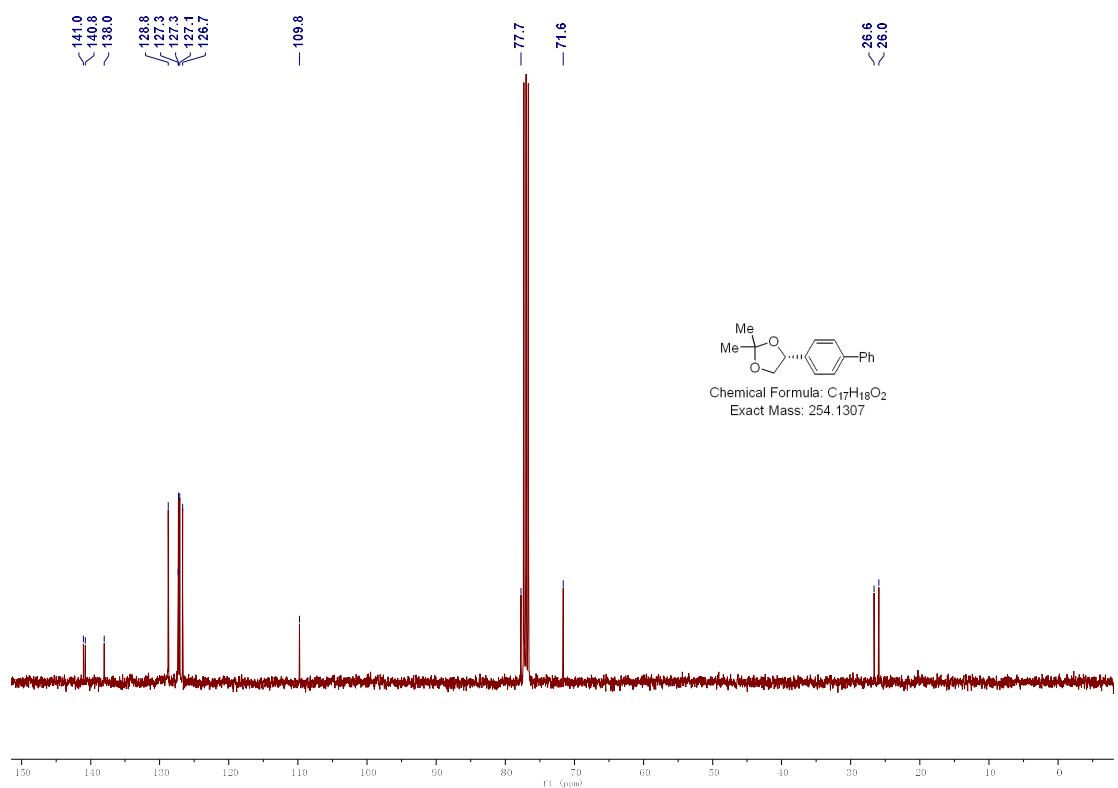

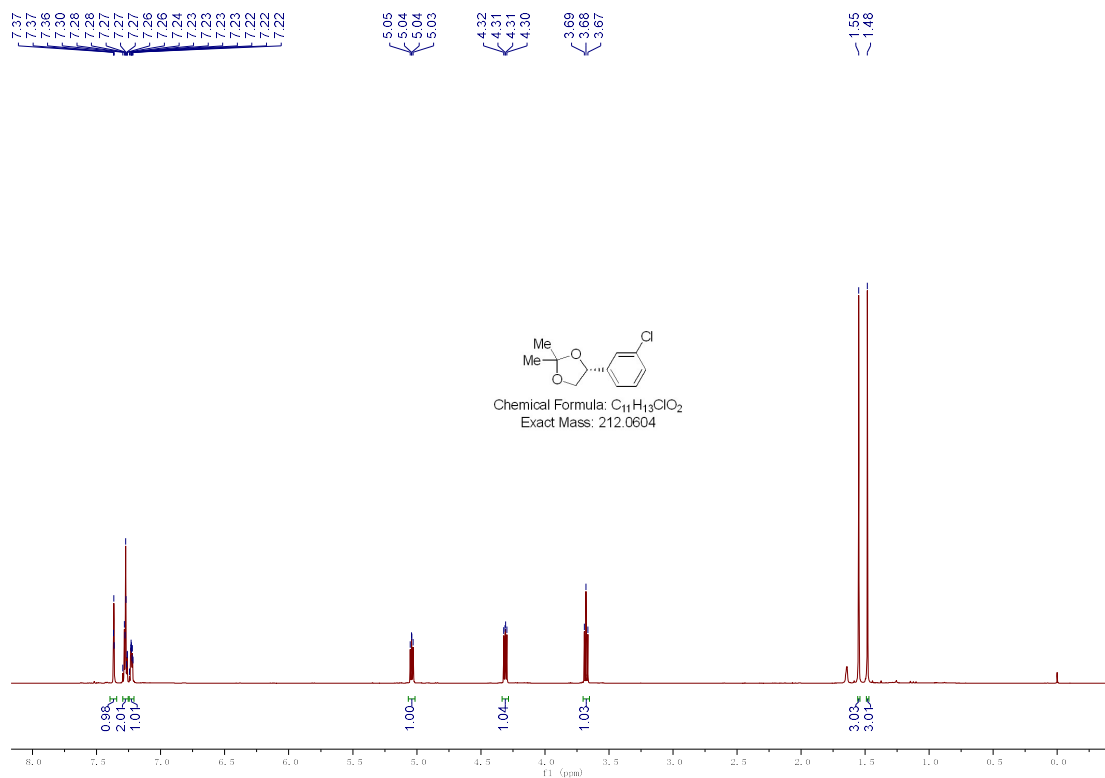

**<sup>1</sup>H NMR (600 MHz, CDCl<sub>3</sub>) Spectrum of 3cl**

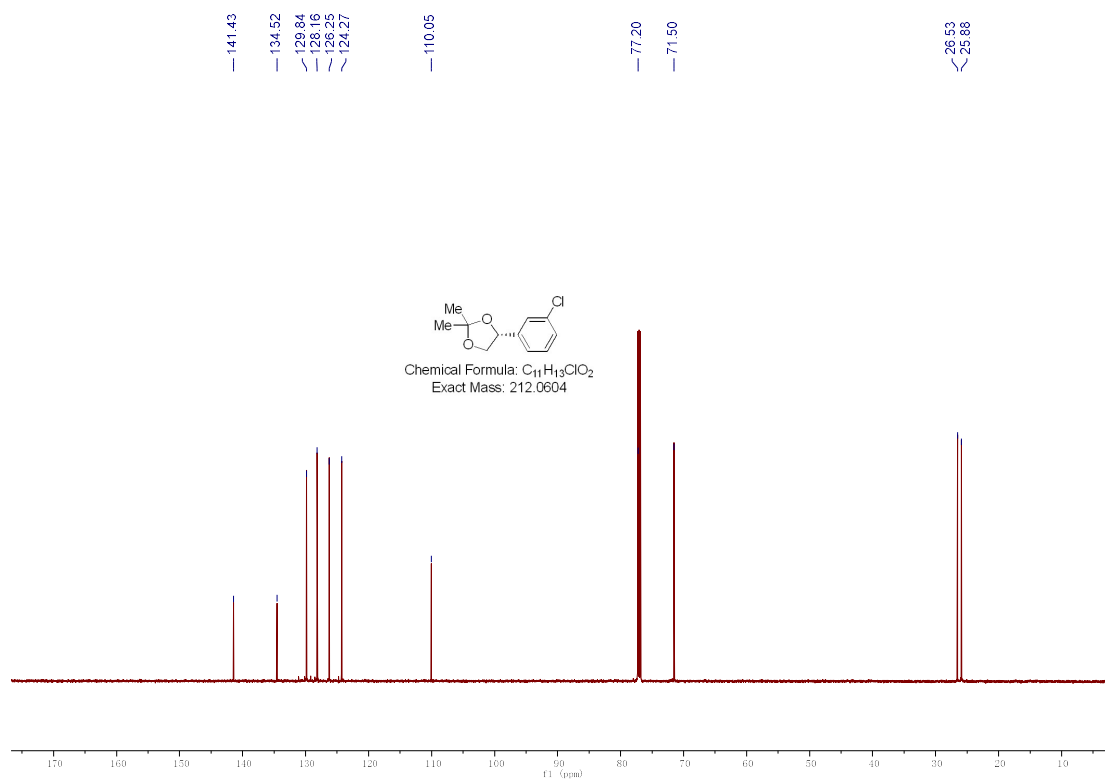

**<sup>13</sup>C NMR (151 MHz, CDCl<sub>3</sub>) Spectrum of 3cl**

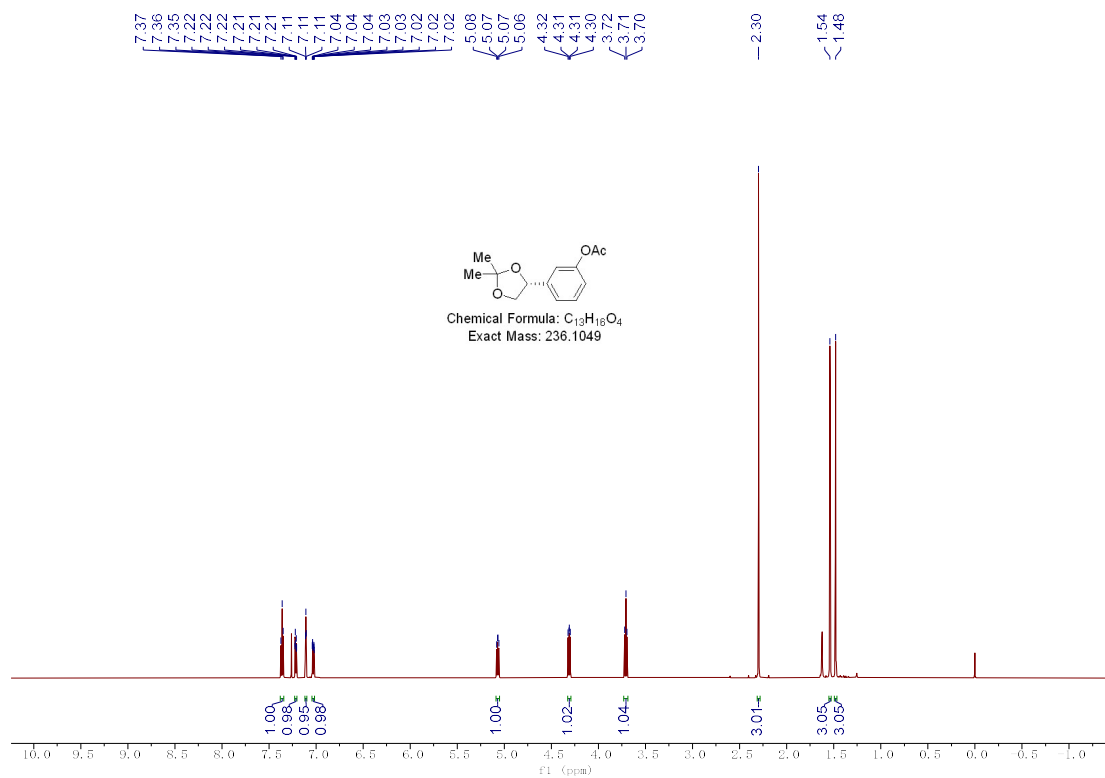

**<sup>1</sup>H NMR (600 MHz, CDCl<sub>3</sub>) Spectrum of 3cm**

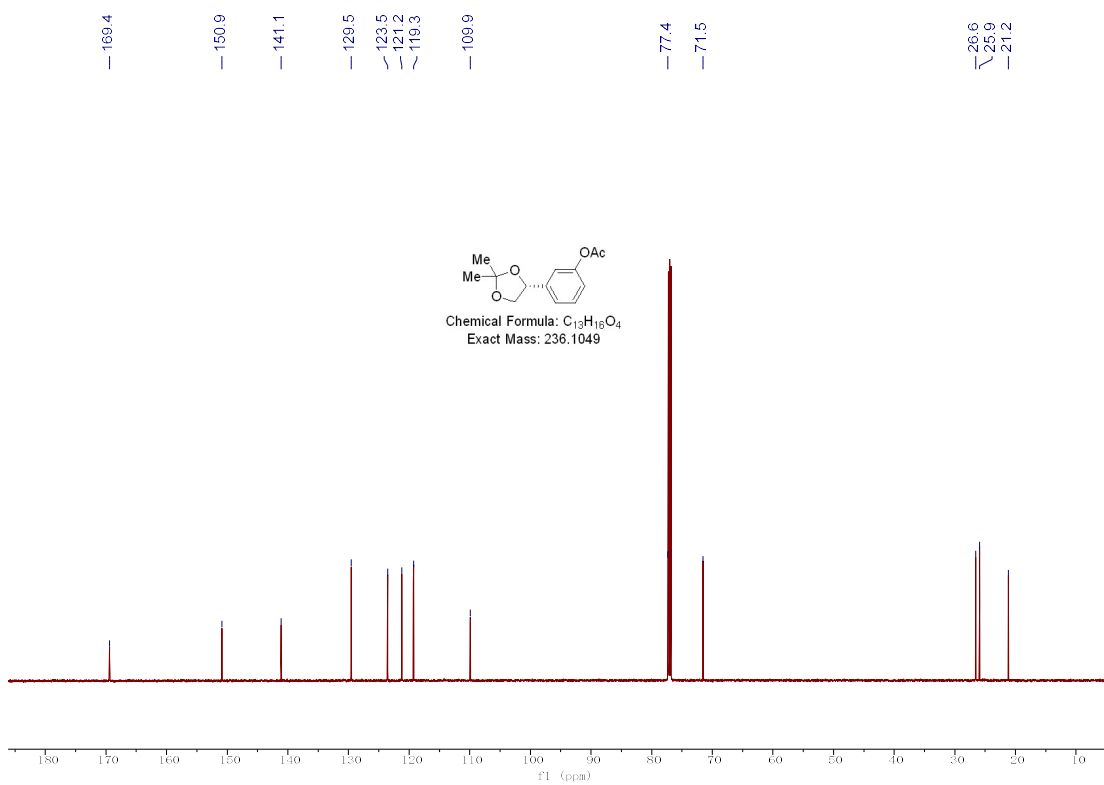

**<sup>13</sup>C NMR (151 MHz, CDCl<sub>3</sub>) Spectrum of 3cm**

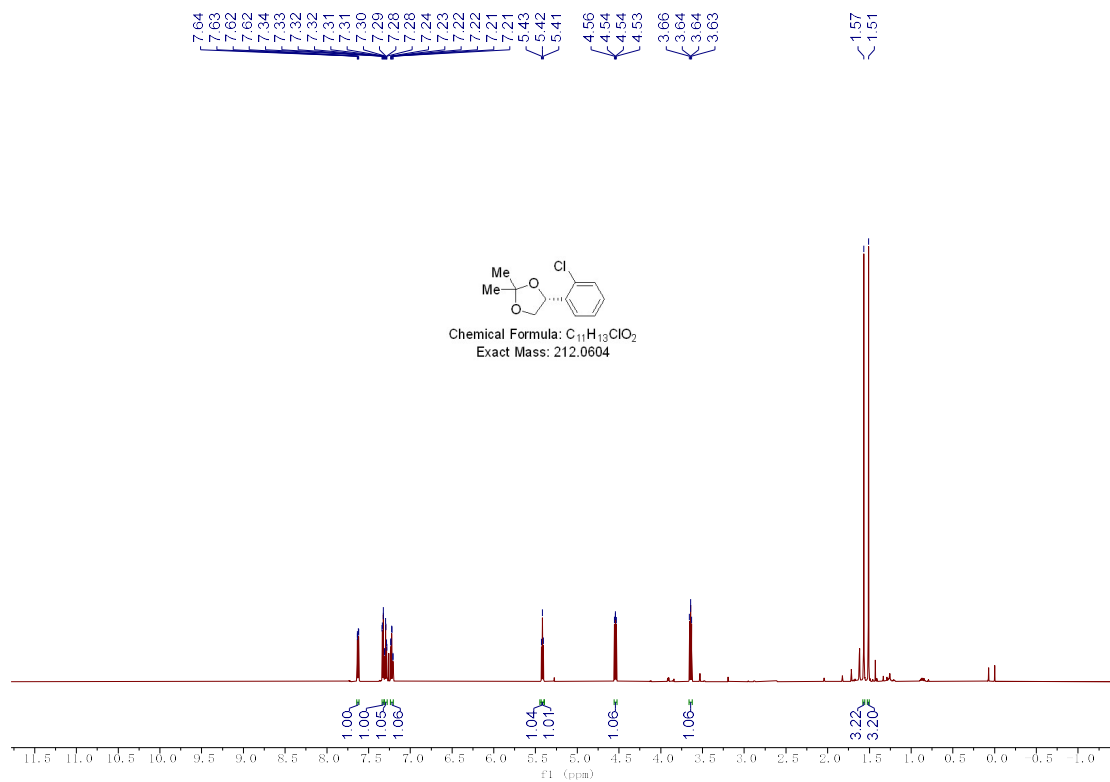

**<sup>1</sup>H NMR (600 MHz, CDCl<sub>3</sub>) Spectrum of 3cn**

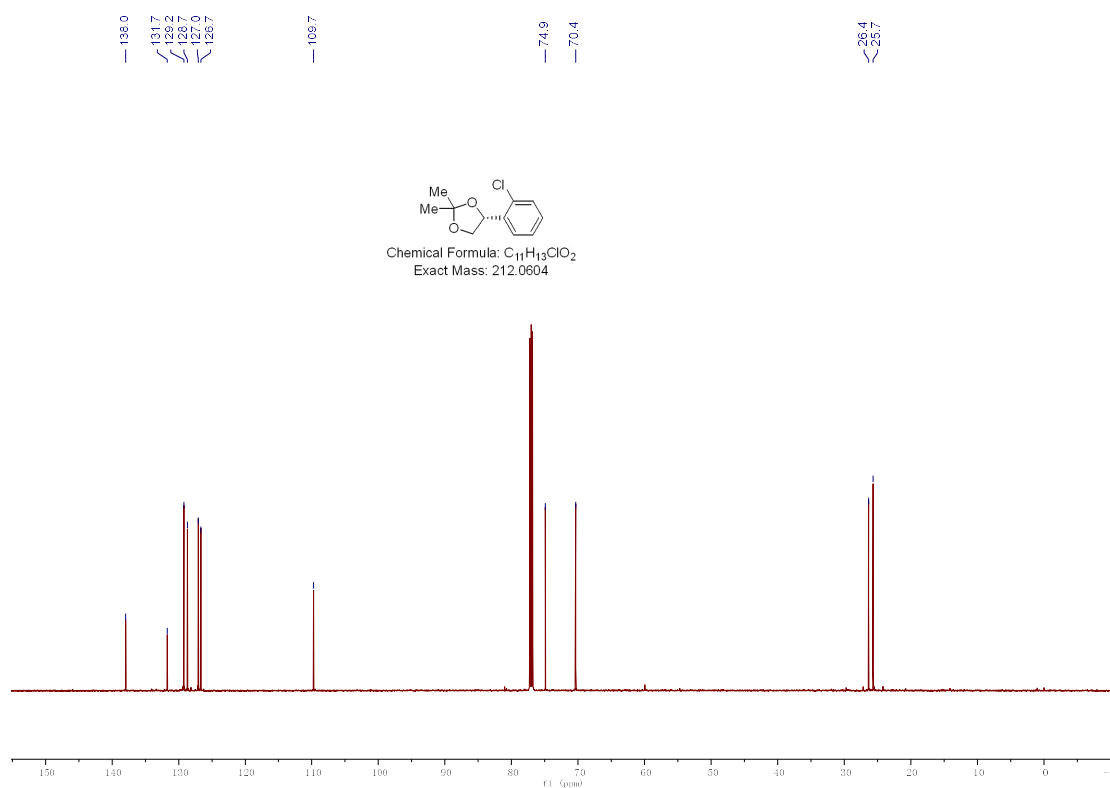

**<sup>13</sup>C NMR (151 MHz, CDCl<sub>3</sub>) Spectrum of 3cn**

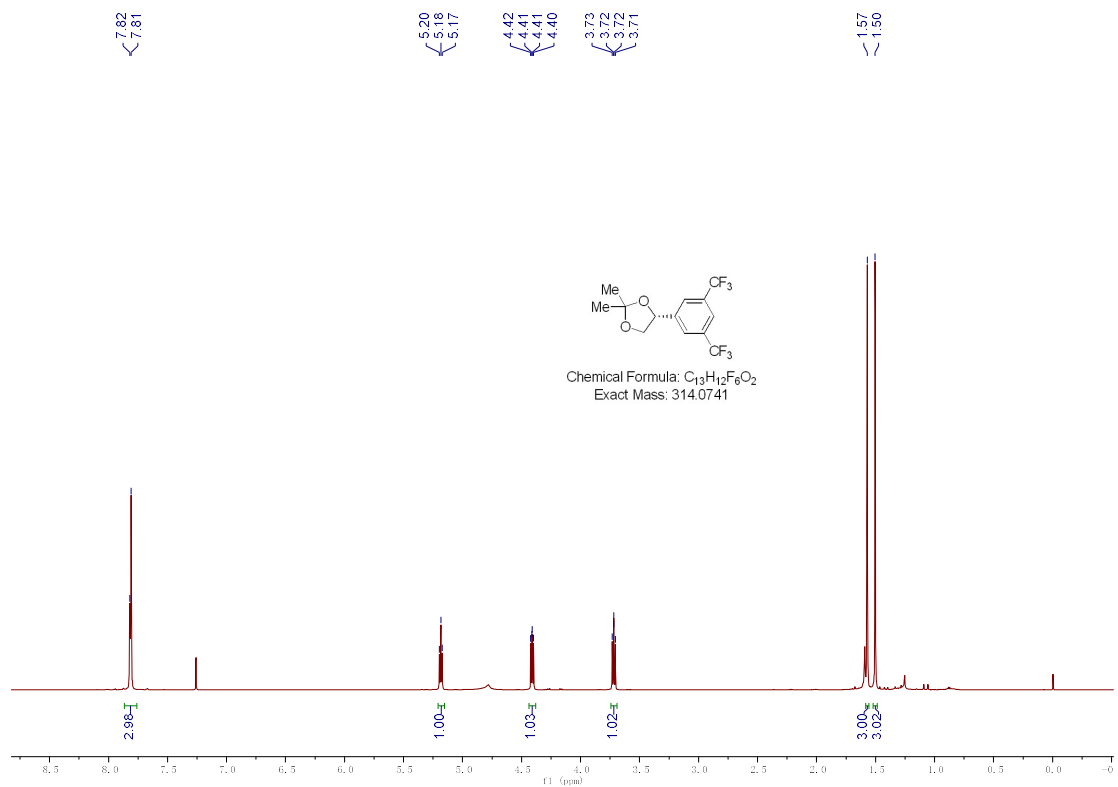

**<sup>1</sup>H NMR (600 MHz, CDCl<sub>3</sub>) Spectrum of 3co**

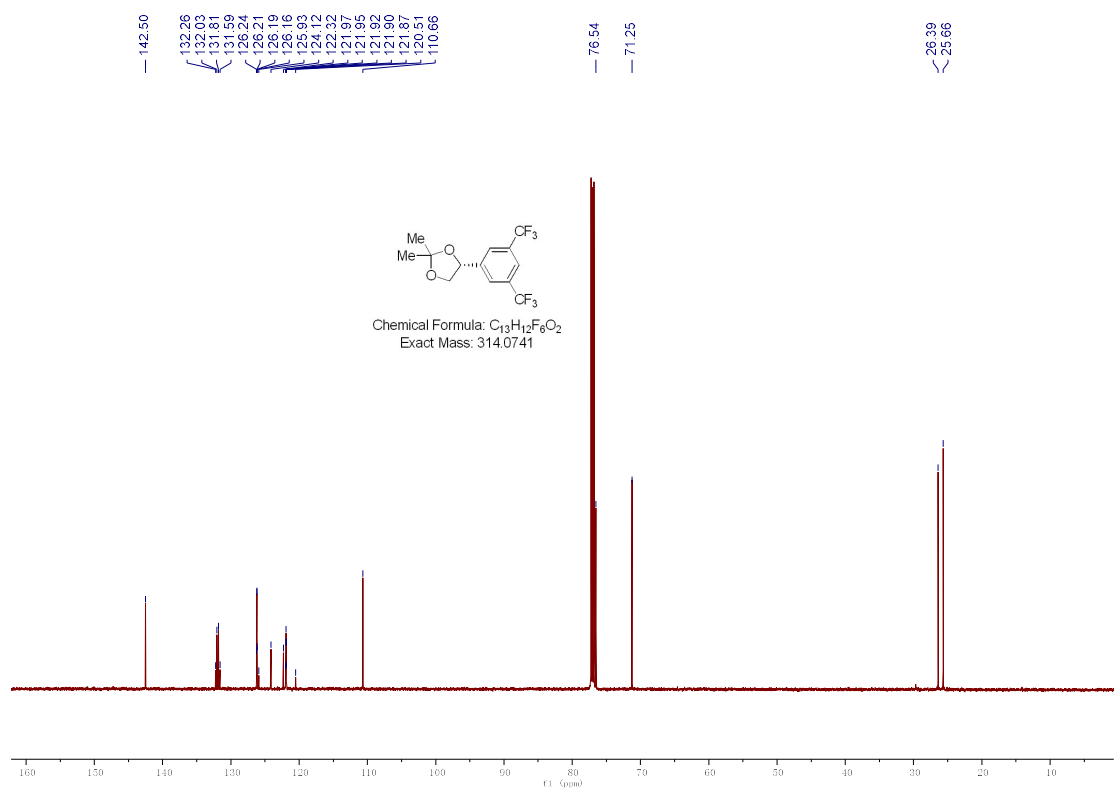

**<sup>13</sup>C NMR (151 MHz, CDCl<sub>3</sub>) Spectrum of 3co**

-62.93

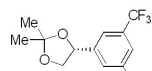

Chemical Formula: C<sub>13</sub>H<sub>12</sub>F<sub>6</sub>O<sub>2</sub>  
Exact Mass: 314.0741

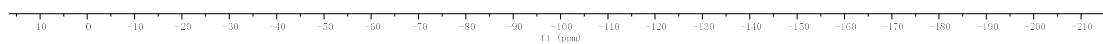

**<sup>19</sup>F NMR (565 MHz, CDCl<sub>3</sub>) Spectrum of 3co**



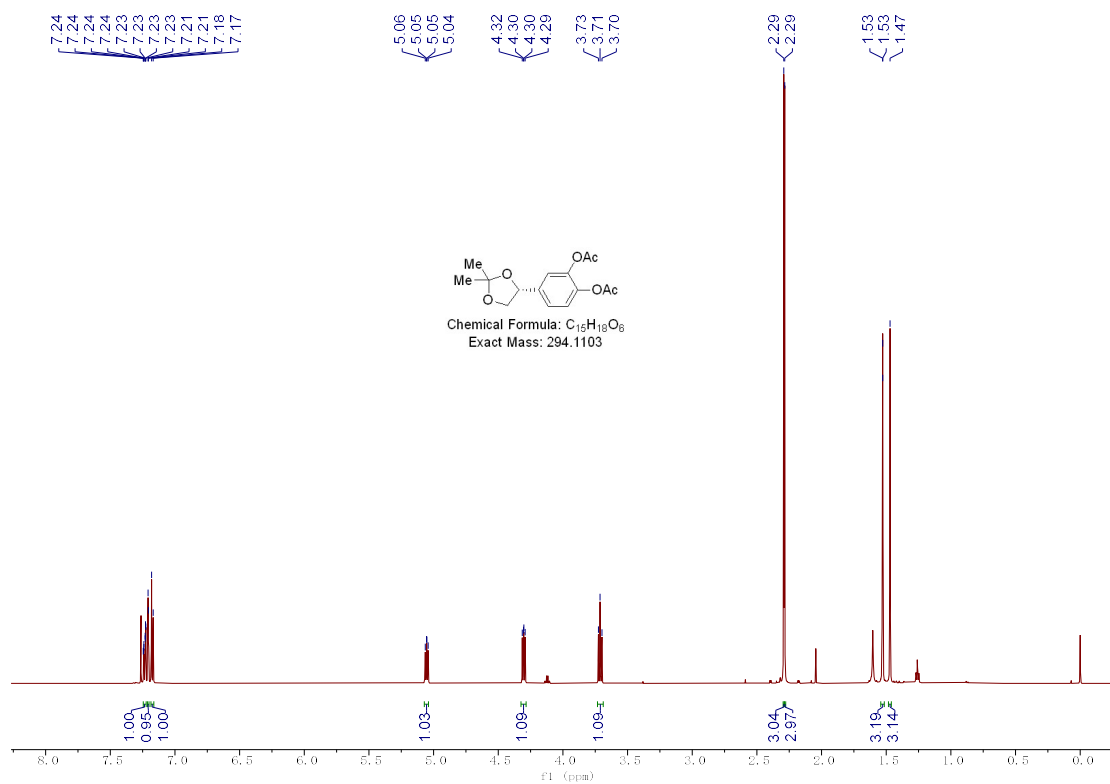

**$^1H$  NMR (600 MHz,  $CDCl_3$ ) Spectrum of 3cp**

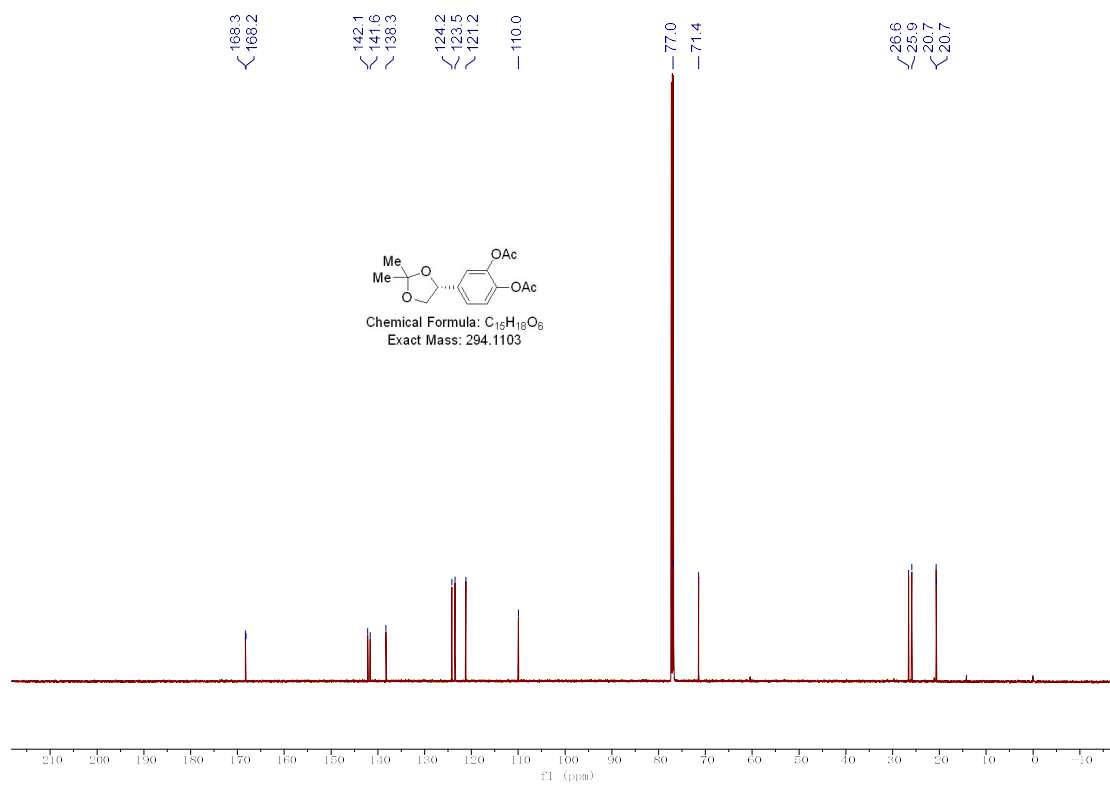

**$^{13}C$  NMR (151 MHz,  $CDCl_3$ ) Spectrum of 3cp**

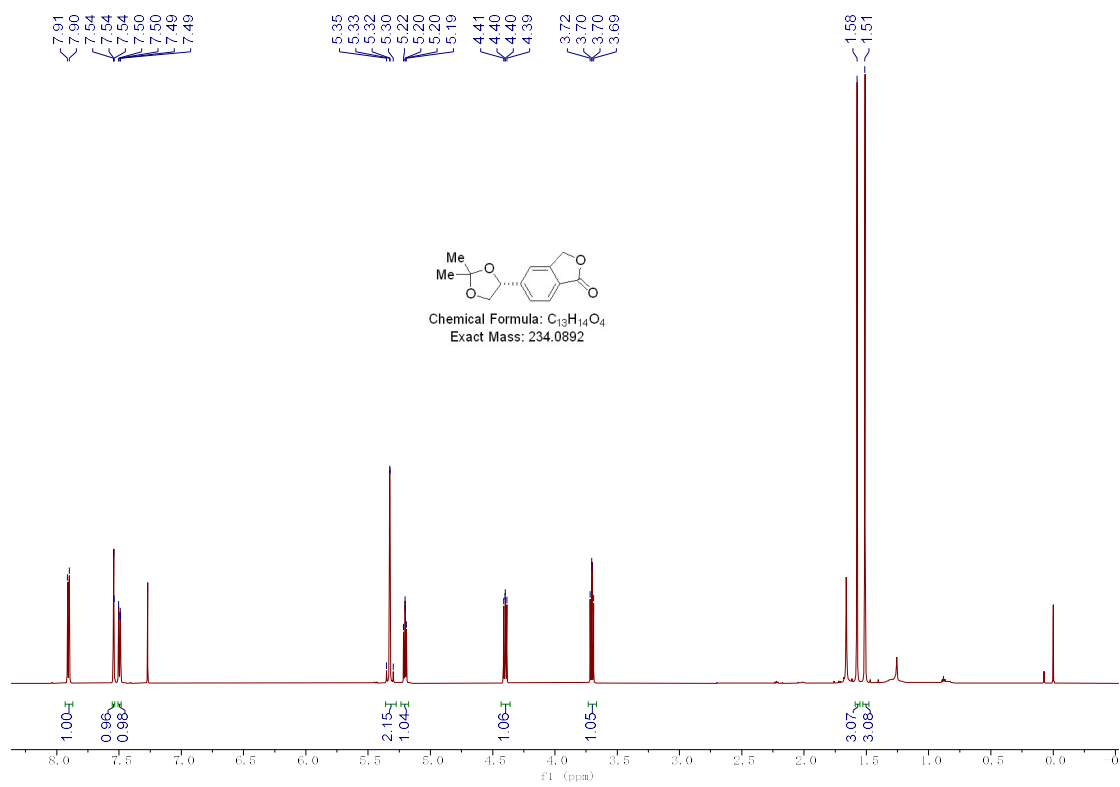

**<sup>1</sup>H NMR (600 MHz, CDCl<sub>3</sub>) Spectrum of 3cq**

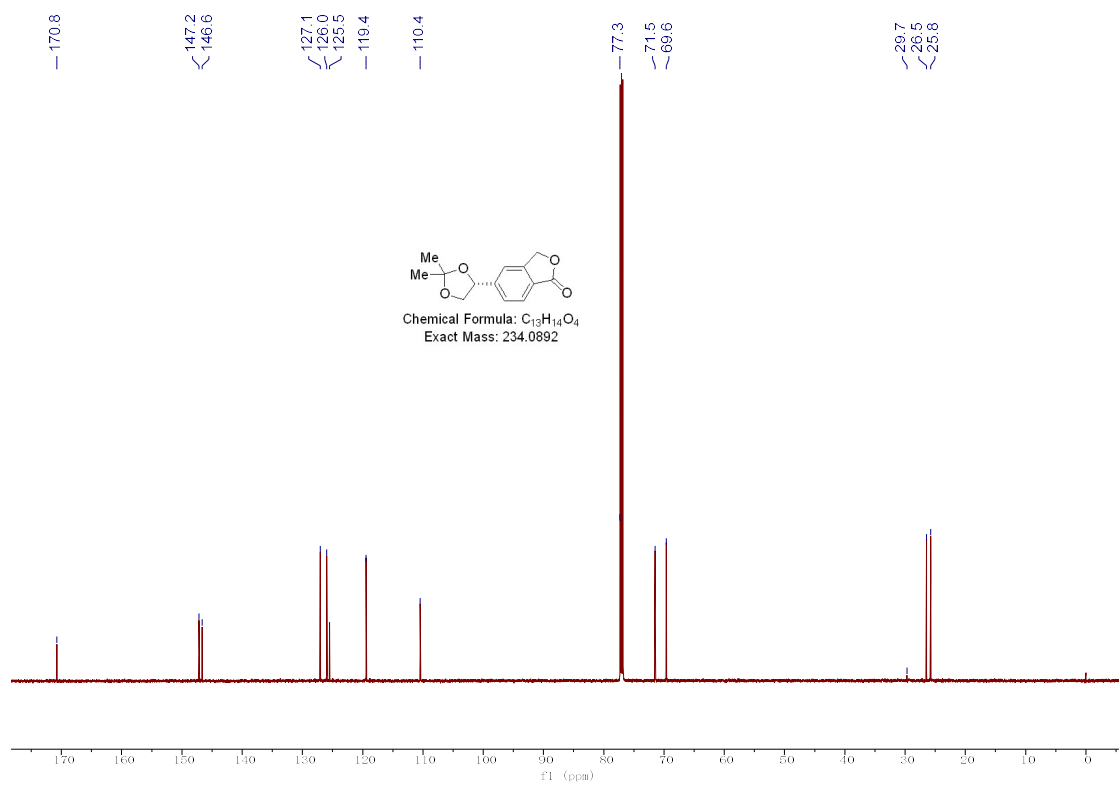

**<sup>13</sup>C NMR (151 MHz, CDCl<sub>3</sub>) Spectrum of 3cq**

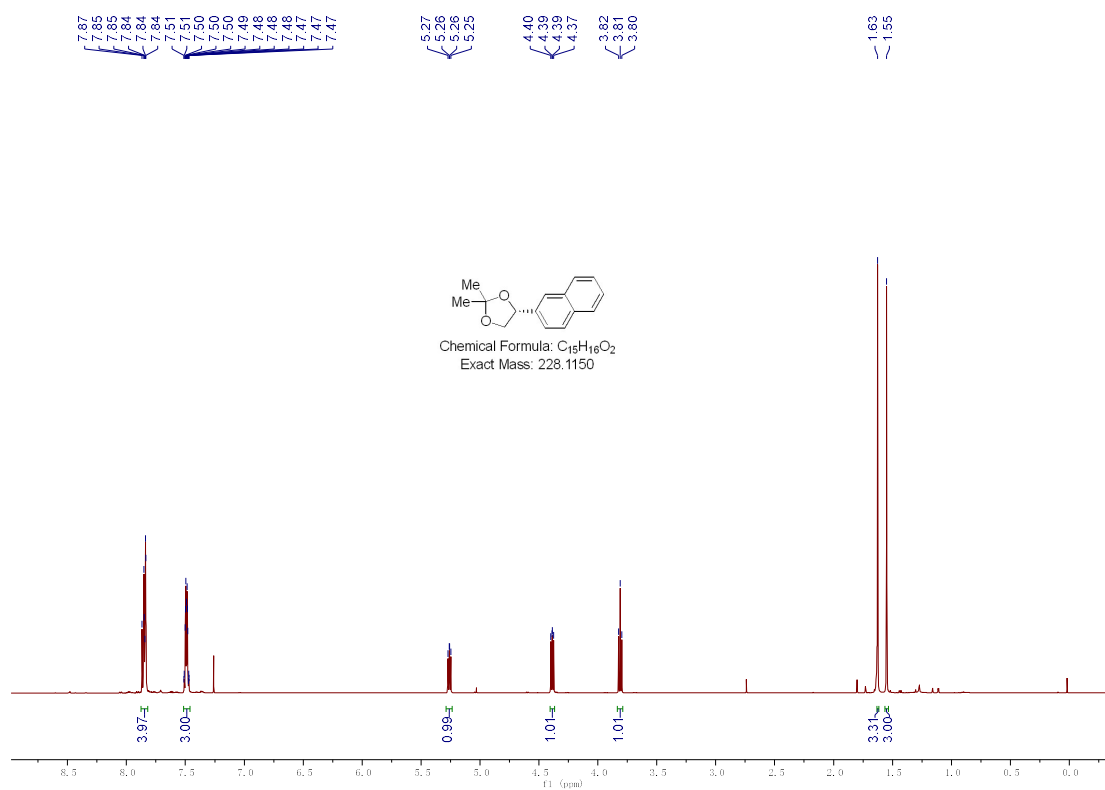

<sup>1</sup>H NMR (600 MHz, CDCl<sub>3</sub>) Spectrum of 3cr

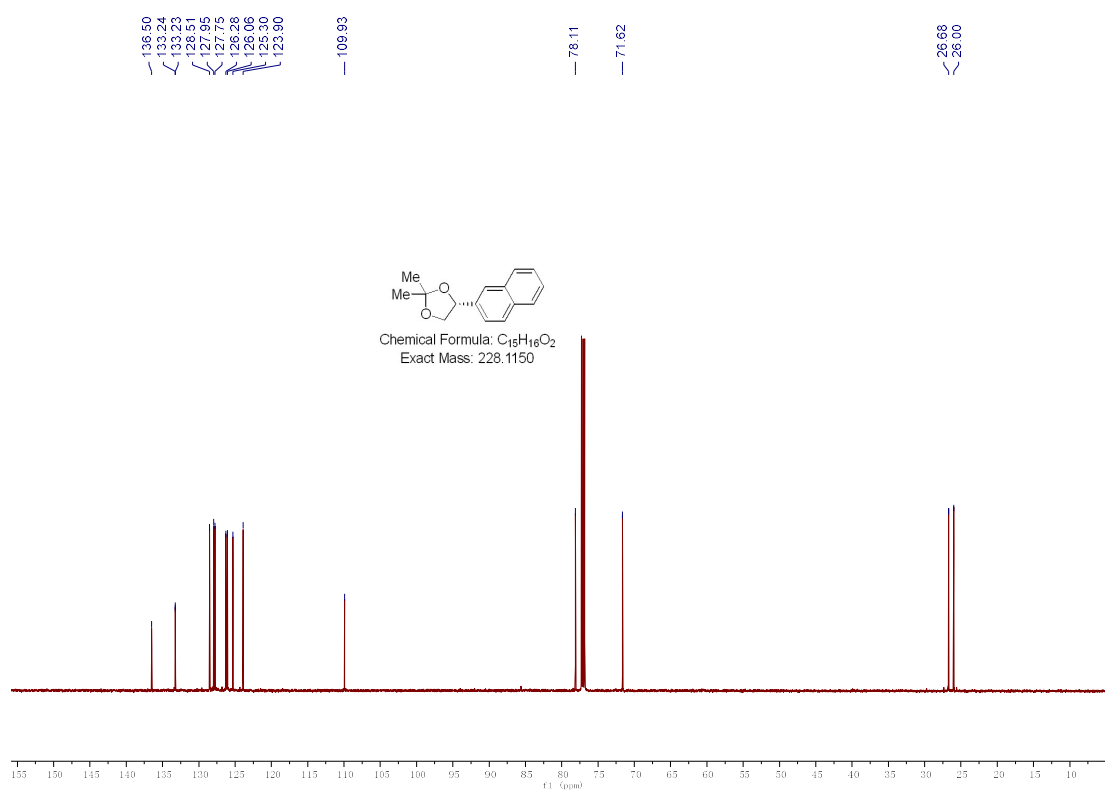

<sup>13</sup>C NMR (151 MHz, CDCl<sub>3</sub>) Spectrum of 3cr

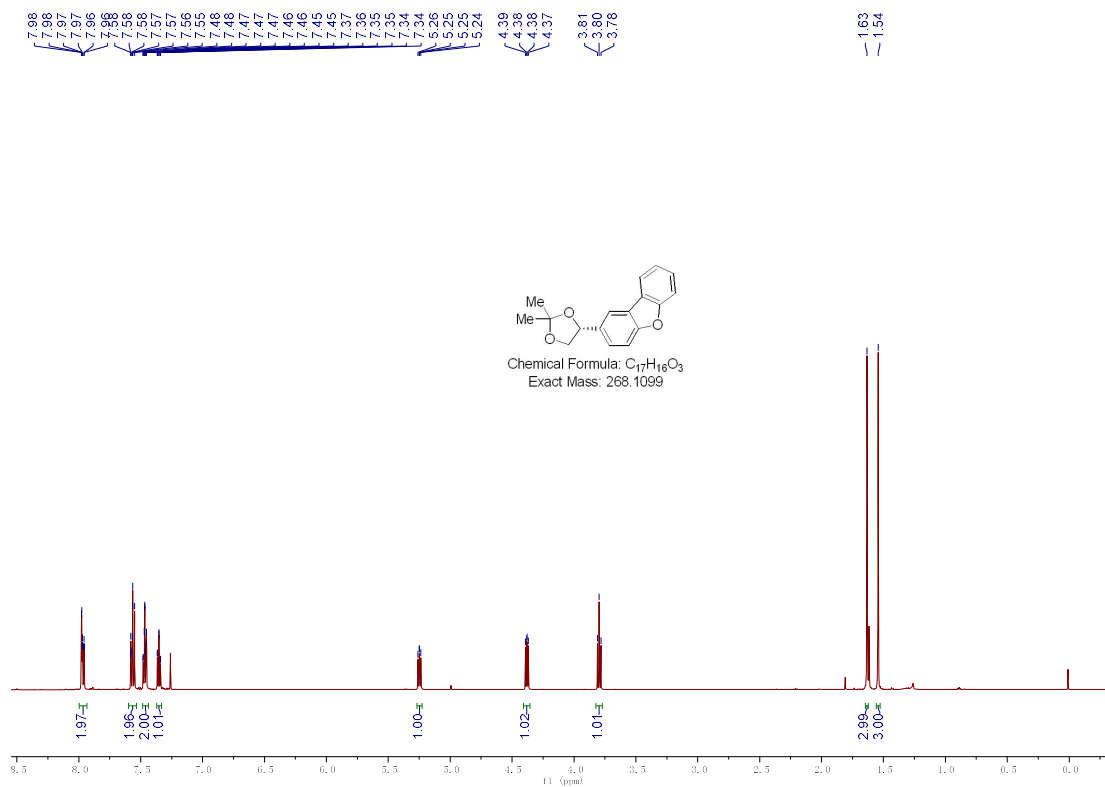

**$^1H$  NMR (600 MHz,  $CDCl_3$ ) Spectrum of 3cs**

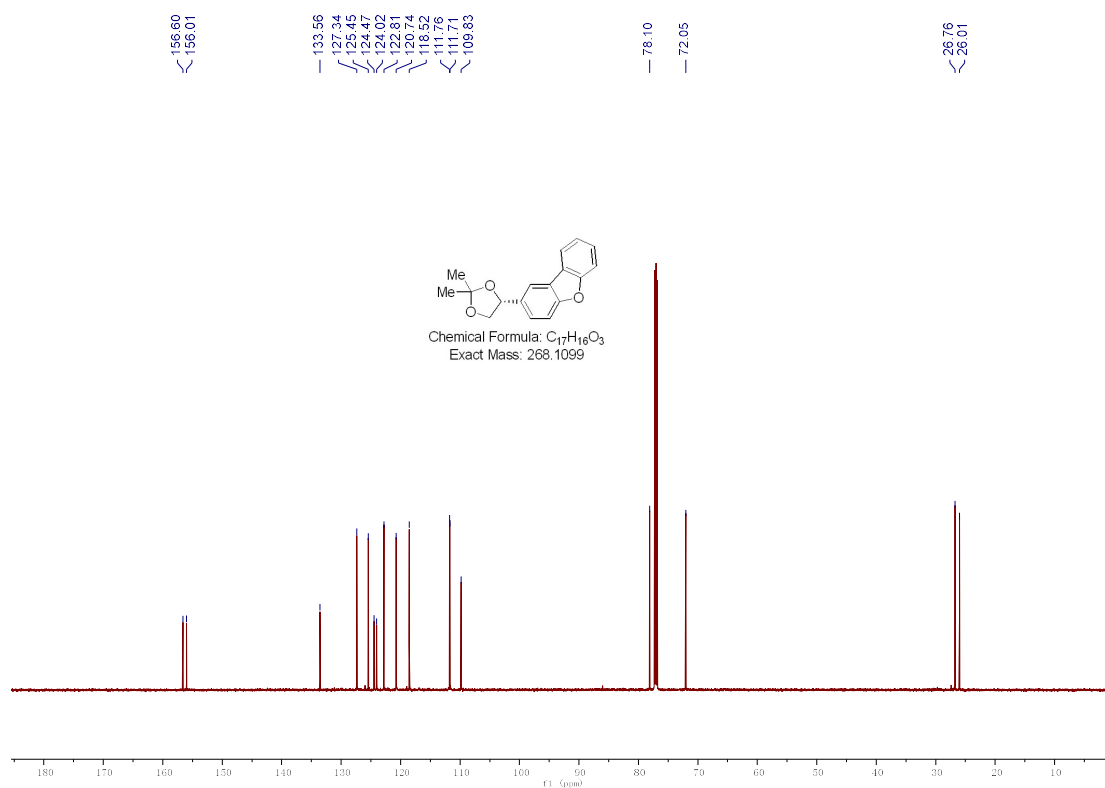

**$^{13}C$  NMR (151 MHz,  $CDCl_3$ ) Spectrum of 3cs**

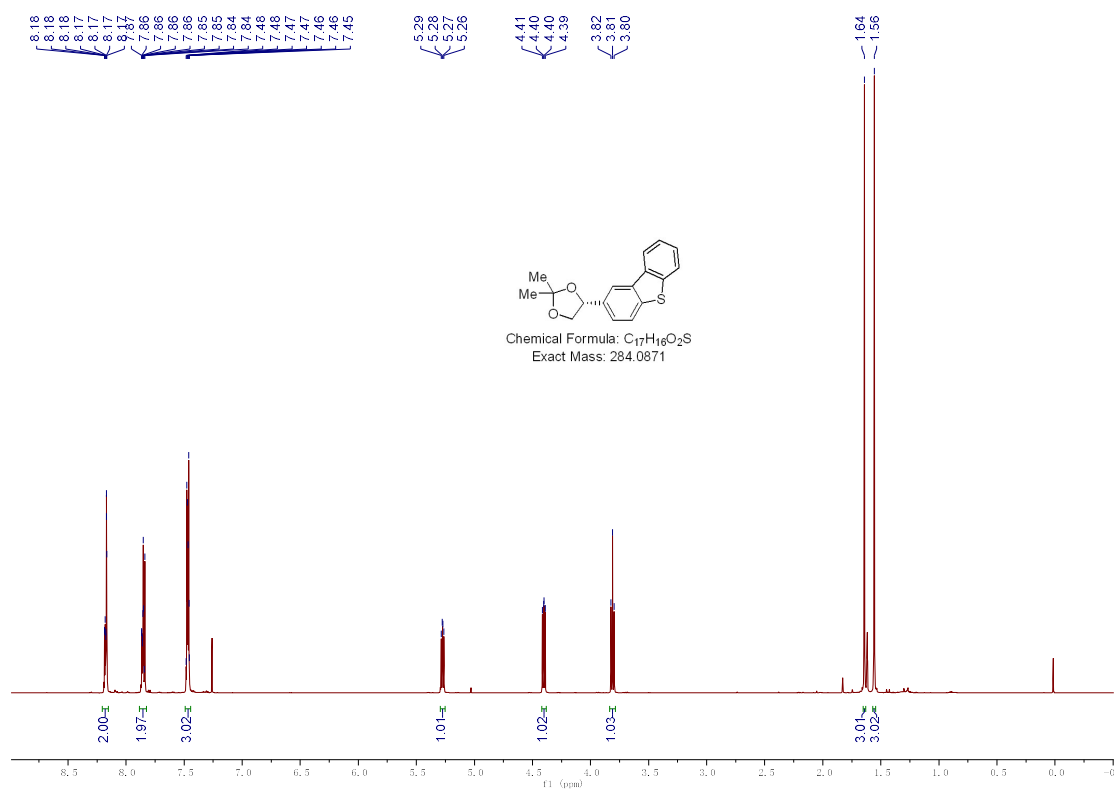

**$^1H$  NMR (600 MHz,  $CDCl_3$ ) Spectrum of 3ct**

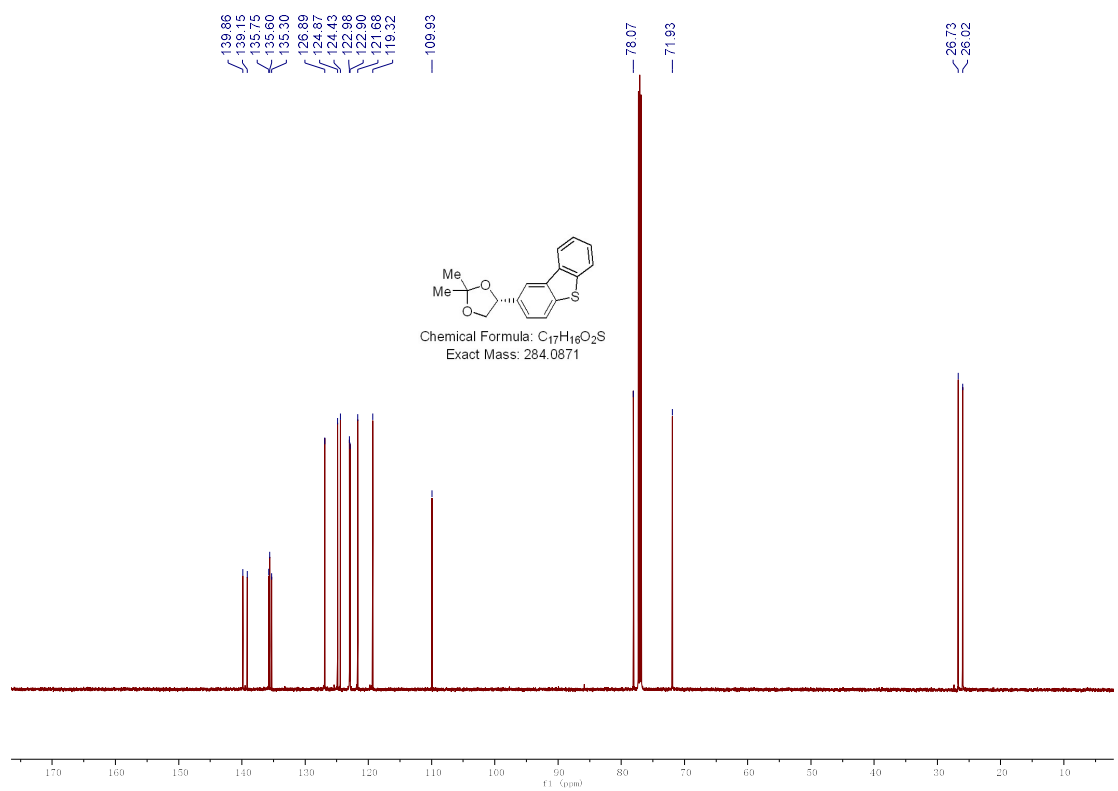

**$^{13}C$  NMR (151 MHz,  $CDCl_3$ ) Spectrum of 3cT**

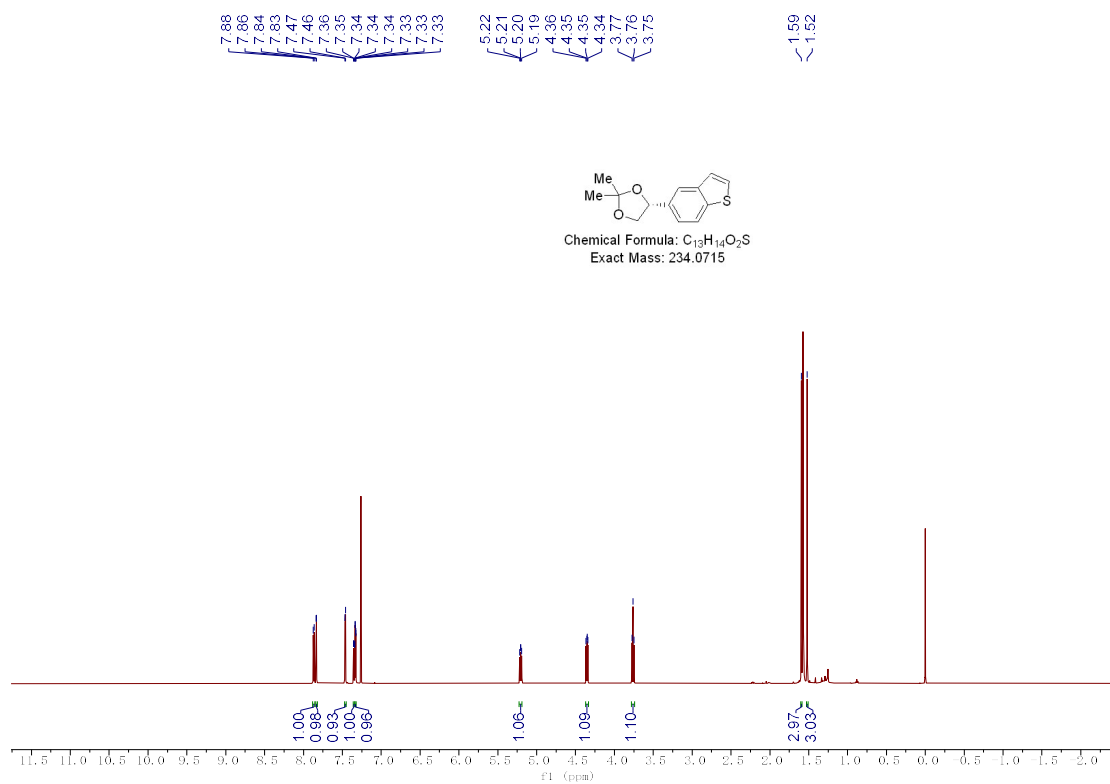

**<sup>1</sup>H NMR (600 MHz, CDCl<sub>3</sub>) Spectrum of 3cu**

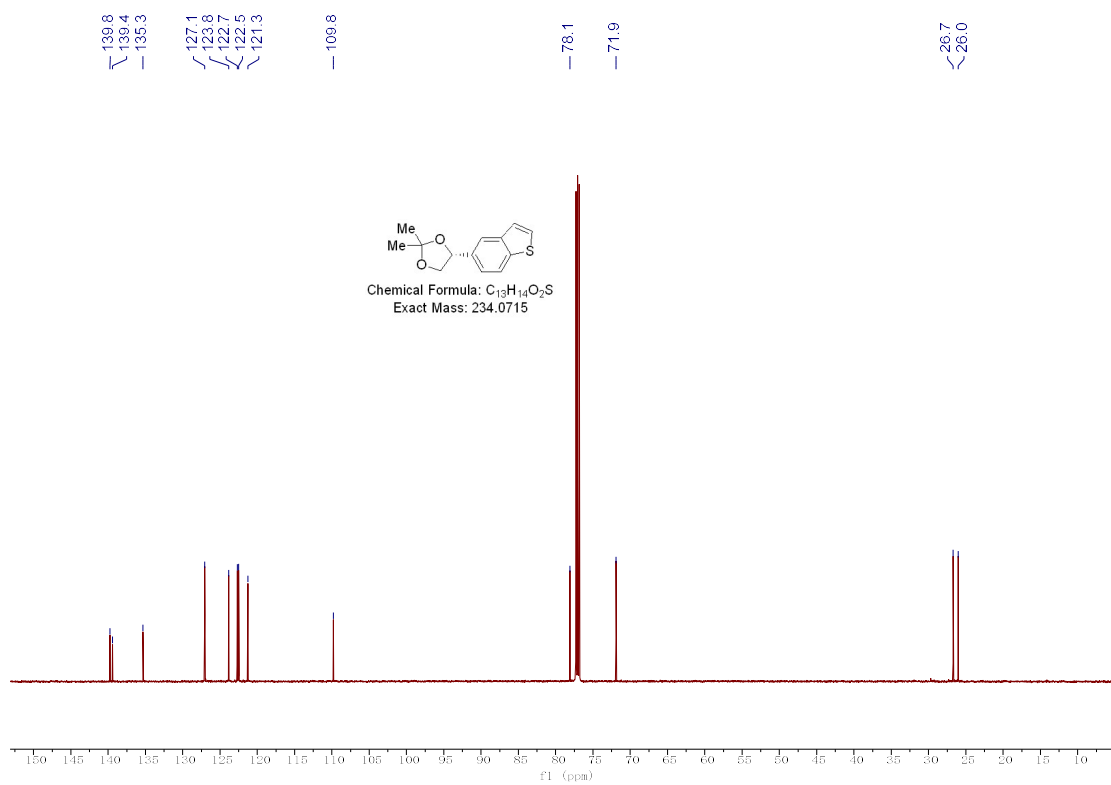

**<sup>13</sup>C NMR (151 MHz, CDCl<sub>3</sub>) Spectrum of 3cu**

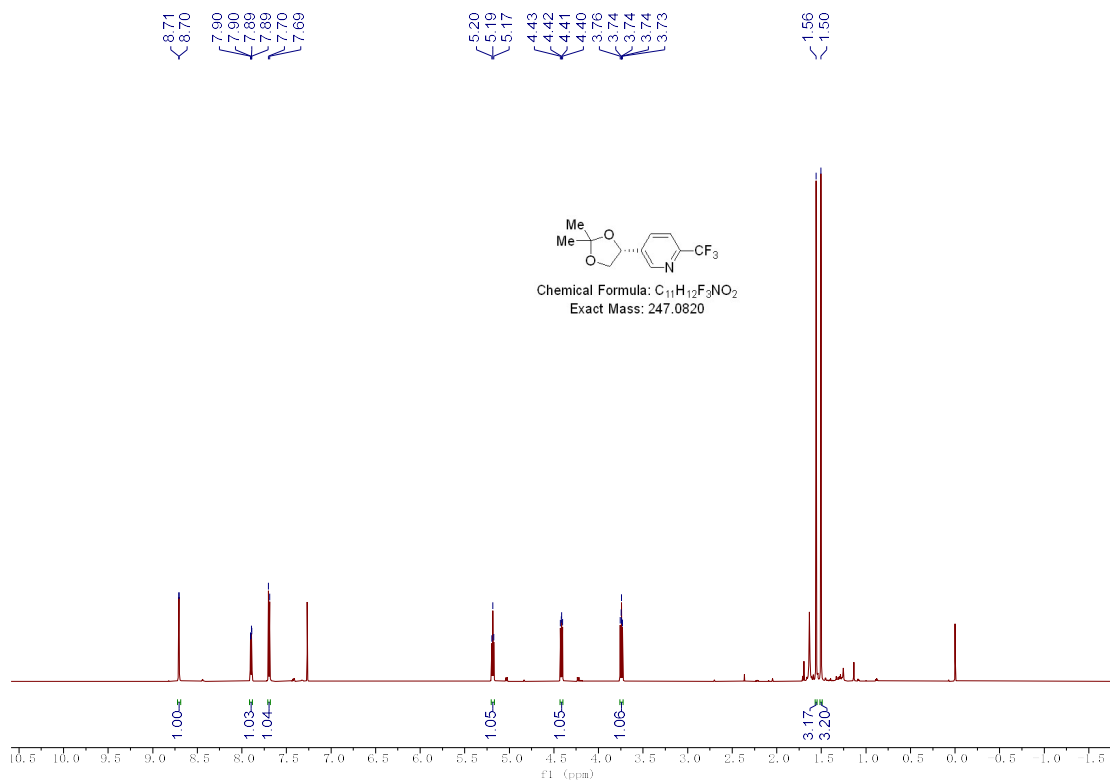

**<sup>1</sup>H NMR (600 MHz, CDCl<sub>3</sub>) Spectrum of 3cv**

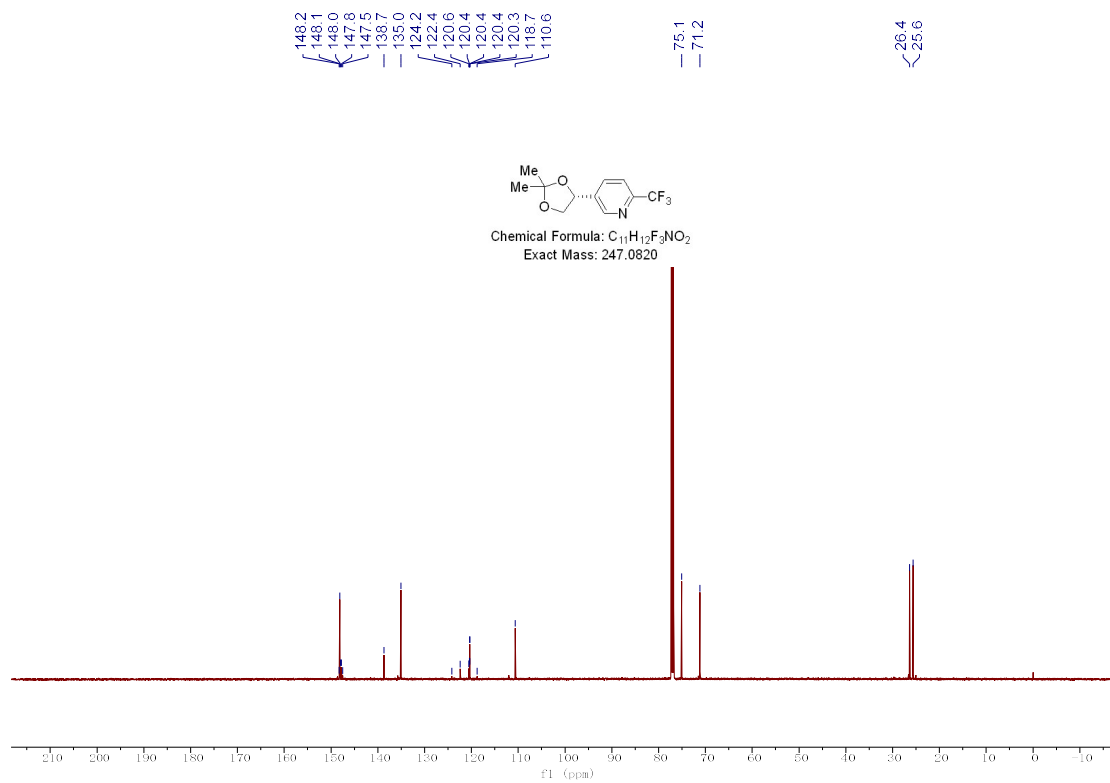

**<sup>13</sup>C NMR (151 MHz, CDCl<sub>3</sub>) Spectrum of 3cv**

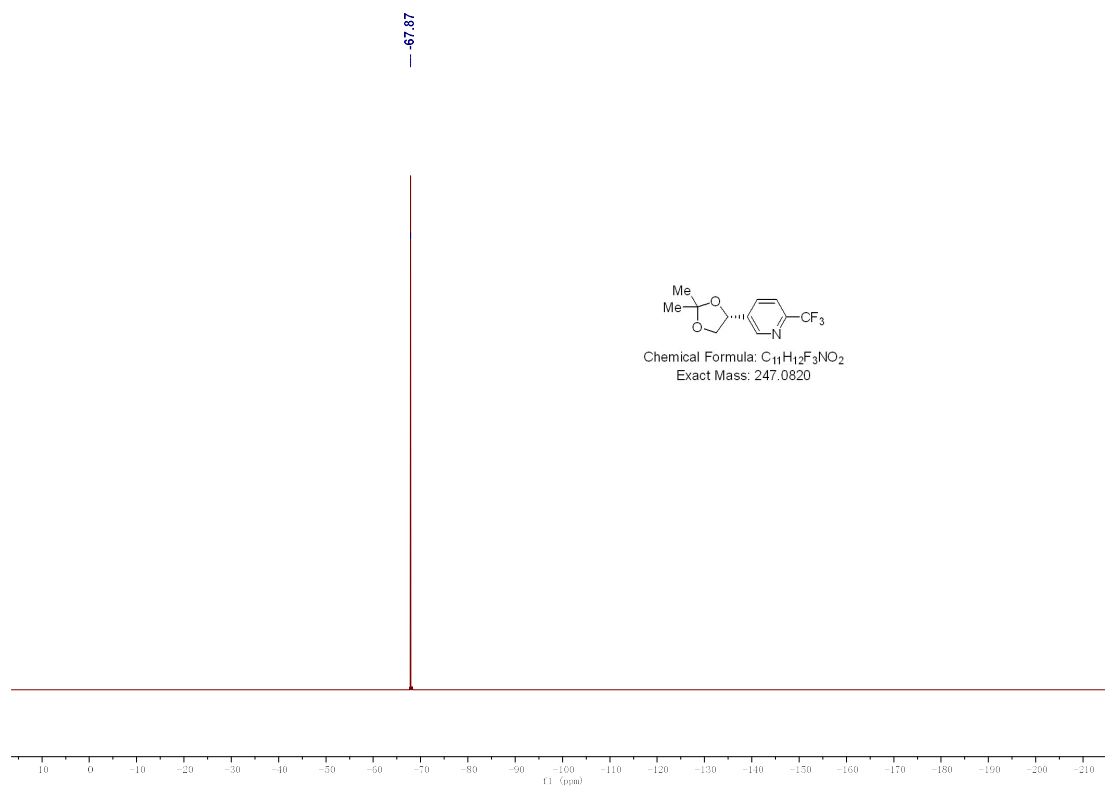

$^{19}\text{F}$  NMR (565 MHz,  $\text{CDCl}_3$ ) Spectrum of 3cv



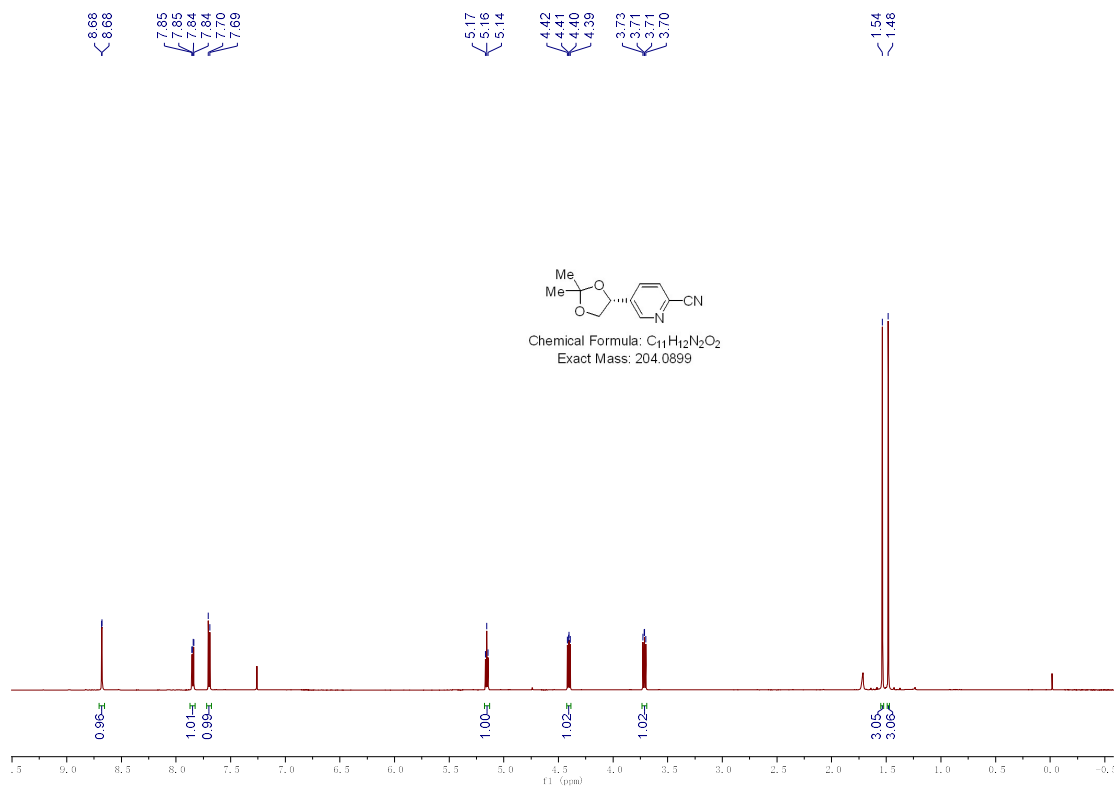

**<sup>1</sup>H NMR (600 MHz, CDCl<sub>3</sub>) Spectrum of 3cw**

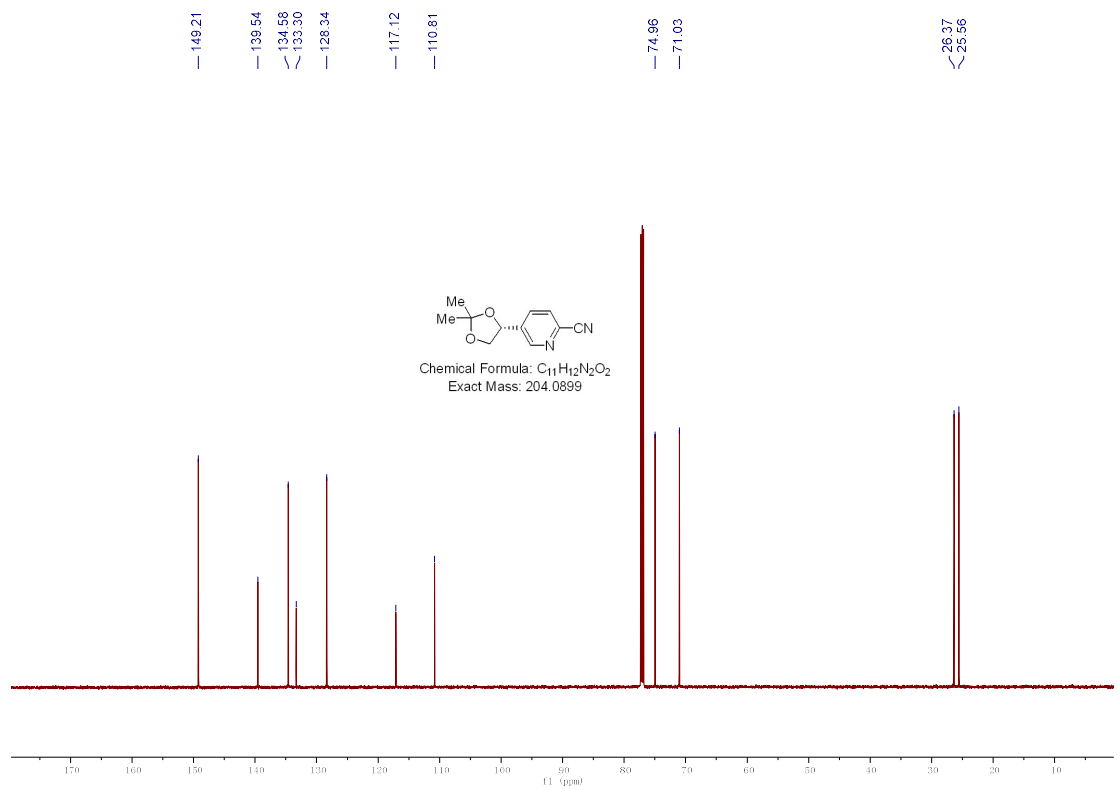

**<sup>13</sup>C NMR (151 MHz, CDCl<sub>3</sub>) Spectrum of 3cw**

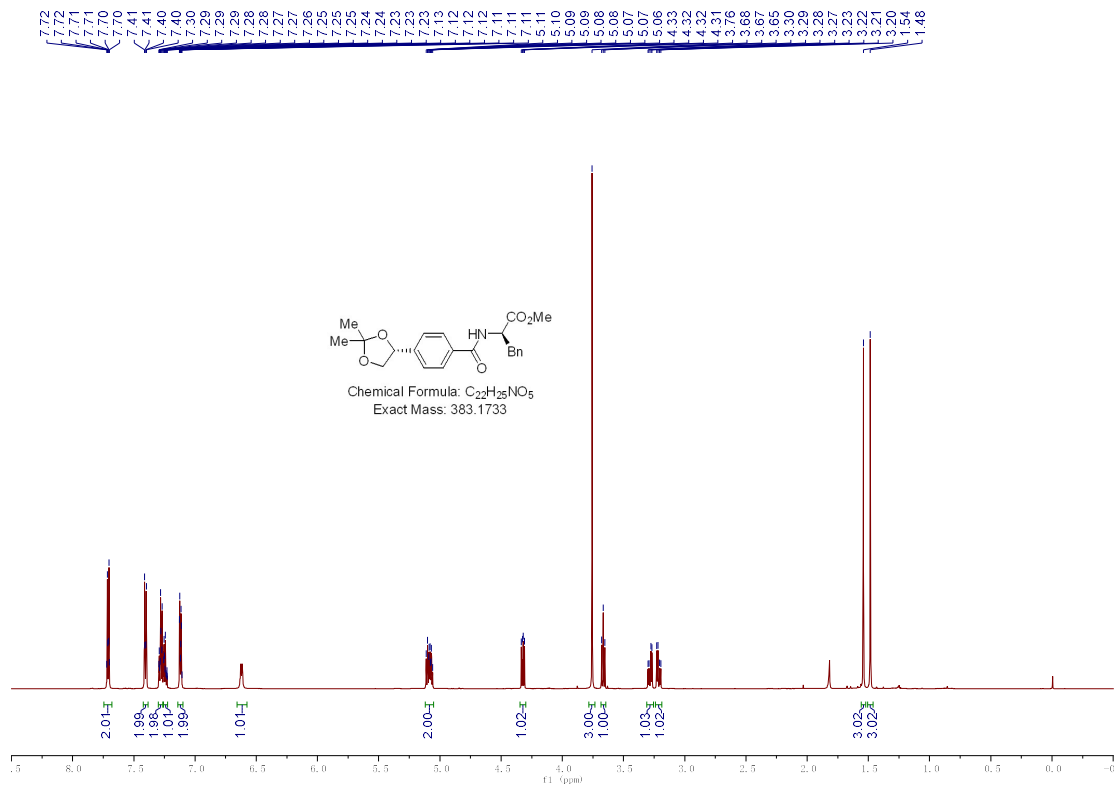

<sup>1</sup>H NMR (600 MHz, CDCl<sub>3</sub>) Spectrum of 3cx

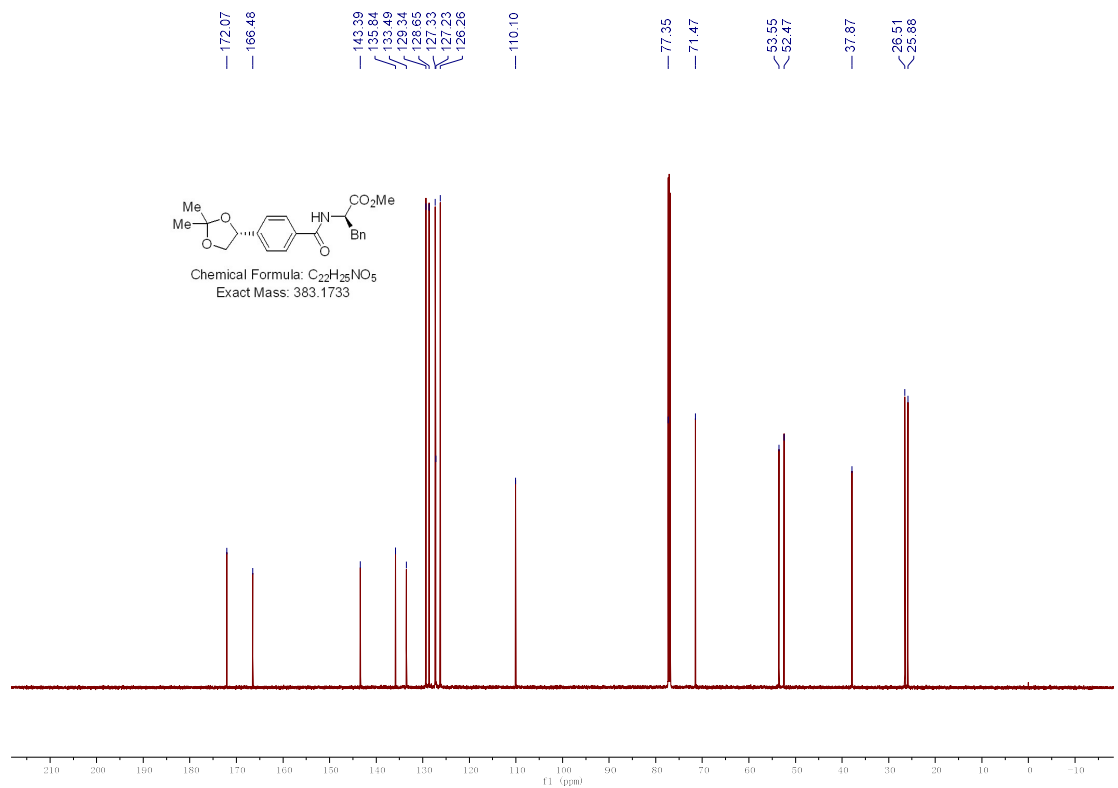

<sup>13</sup>C NMR (151 MHz, CDCl<sub>3</sub>) Spectrum of 3cx

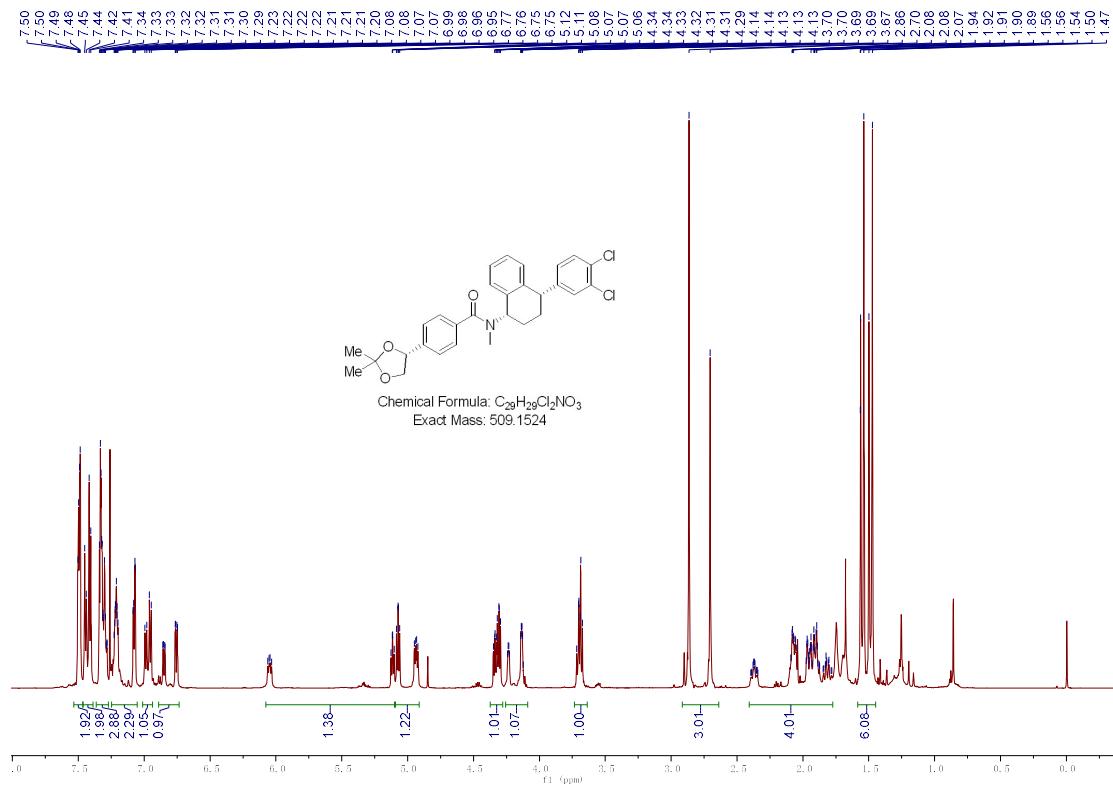

<sup>1</sup>H NMR (600 MHz, CDCl<sub>3</sub>) Spectrum of 3cy

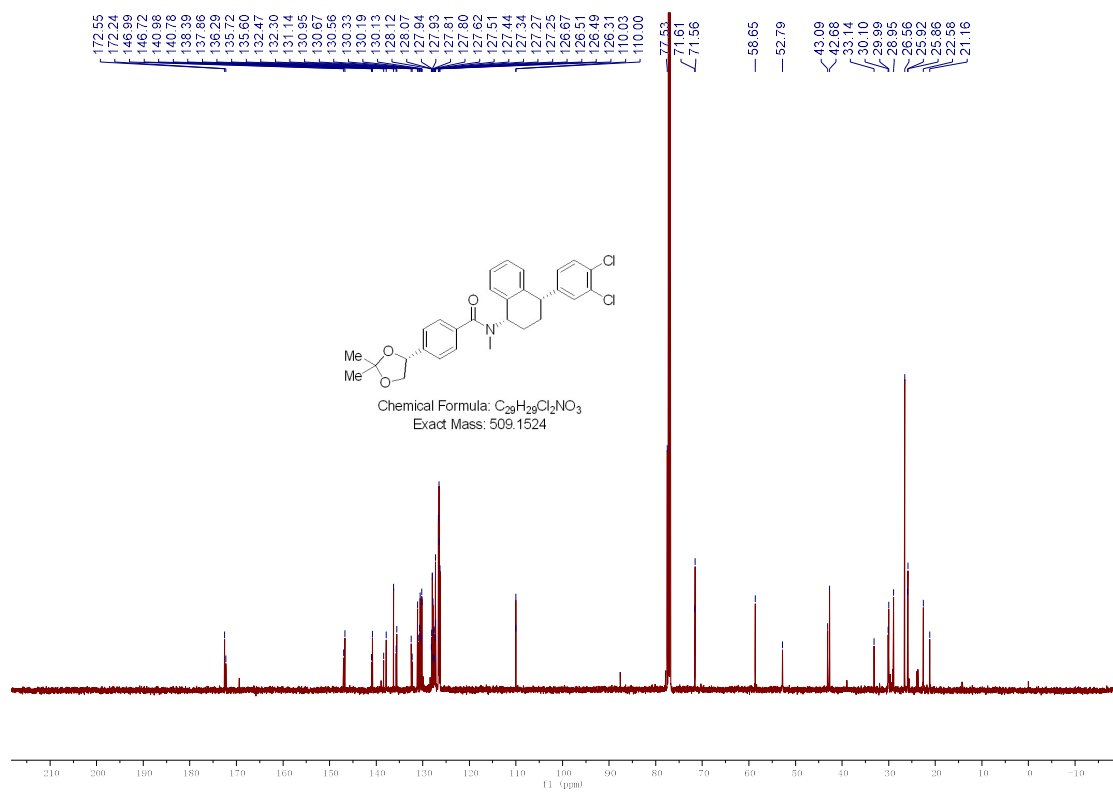

<sup>13</sup>C NMR (151 MHz, CDCl<sub>3</sub>) Spectrum of 3cy

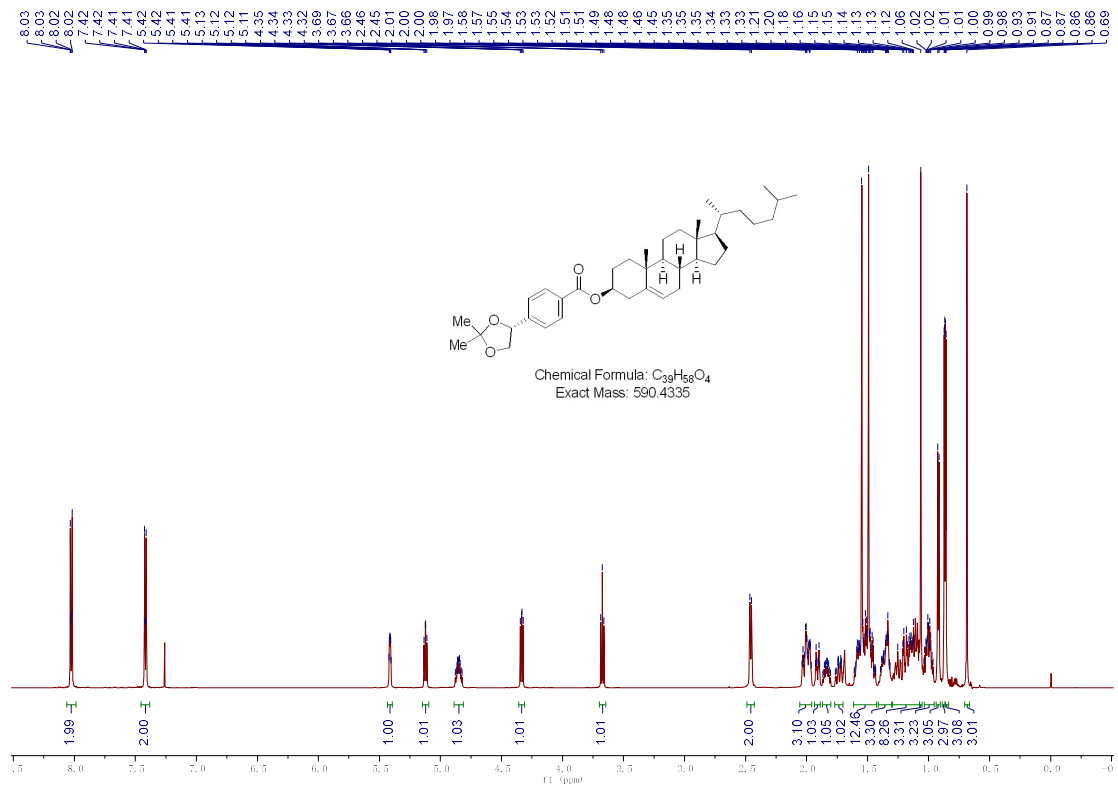

$^1H$  NMR (600 MHz,  $CDCl_3$ ) Spectrum of 3cz

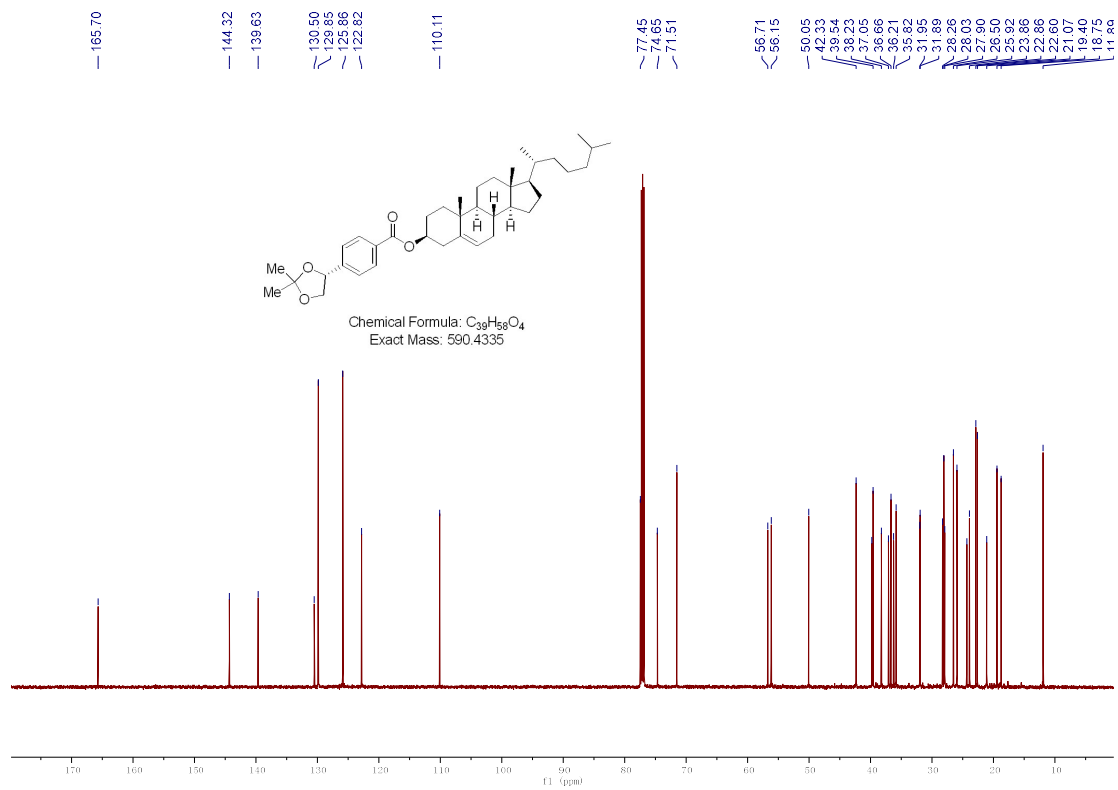

$^{13}C$  NMR (151 MHz,  $CDCl_3$ ) Spectrum of 3cz

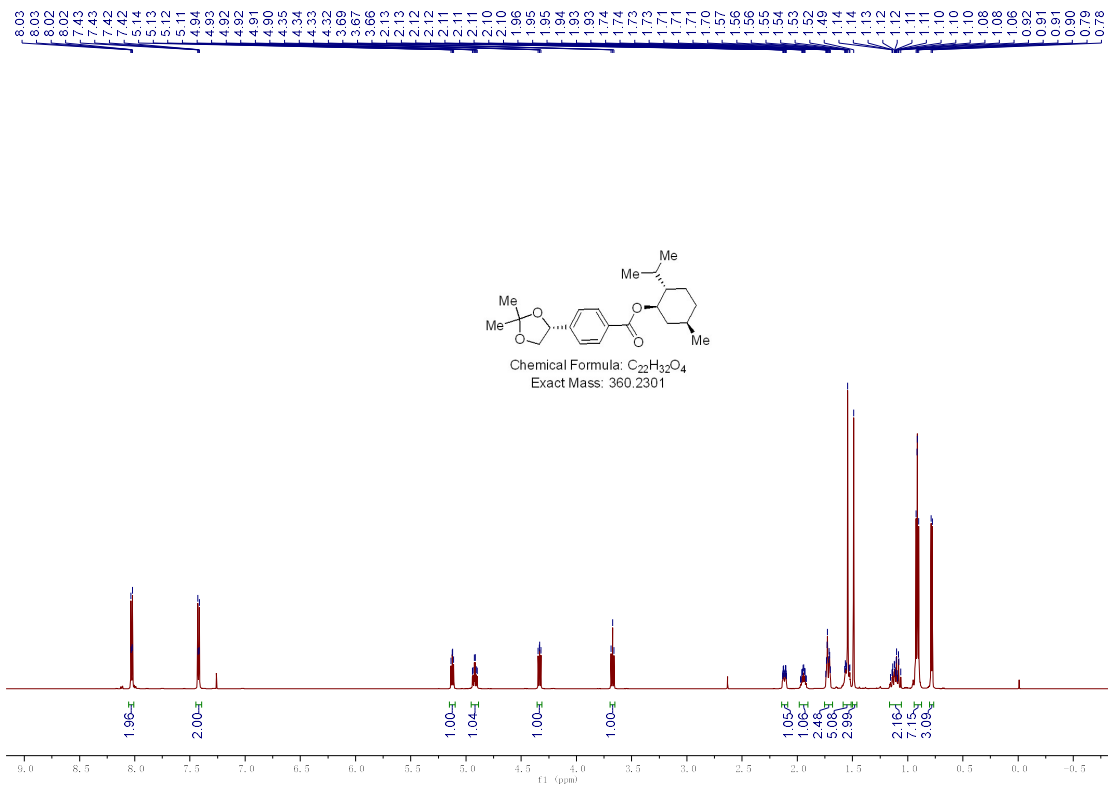

**$^1\text{H}$  NMR (600 MHz,  $\text{CDCl}_3$ ) Spectrum of 3caa**

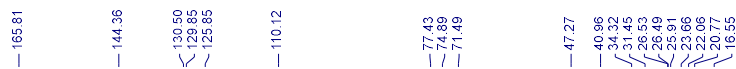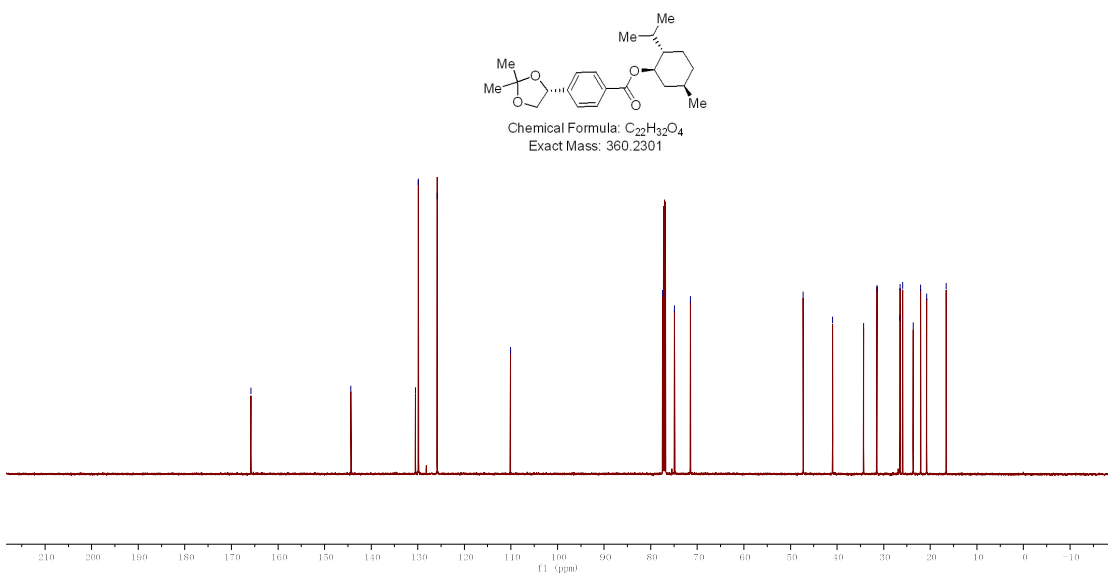

**$^{13}\text{C}$  NMR (151 MHz,  $\text{CDCl}_3$ ) Spectrum of 3caa**

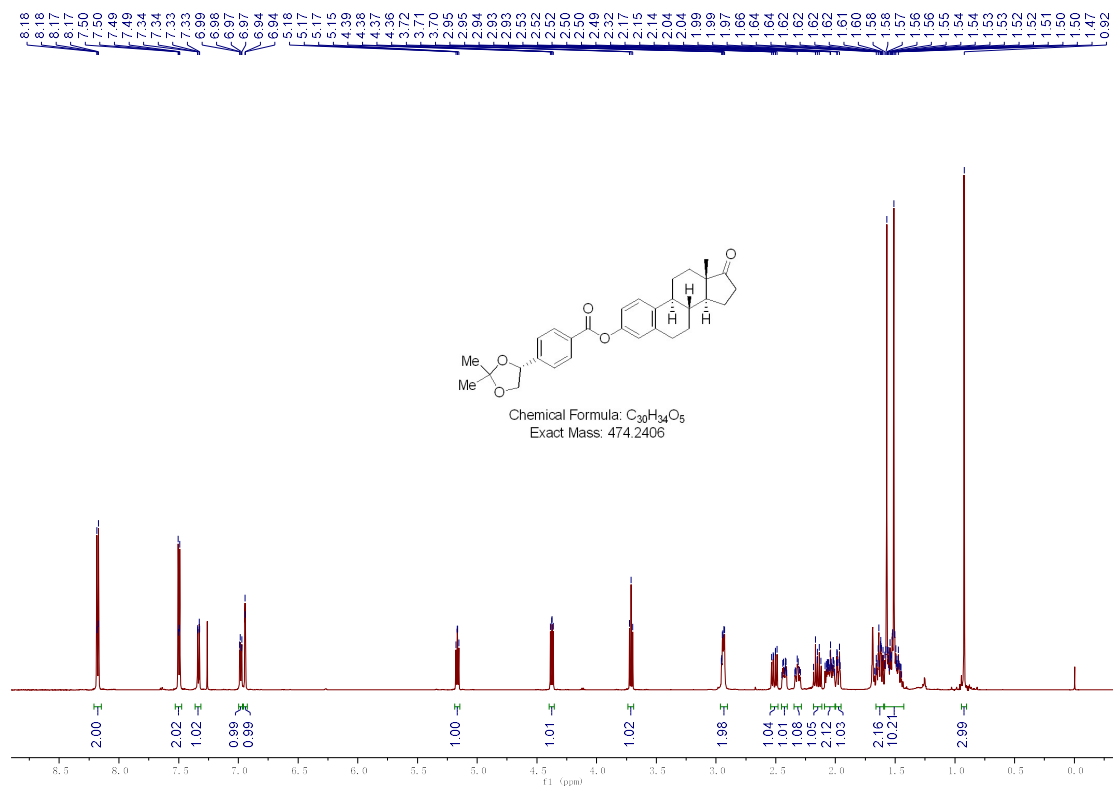

<sup>1</sup>H NMR (600 MHz, CDCl<sub>3</sub>) Spectrum of 3cb

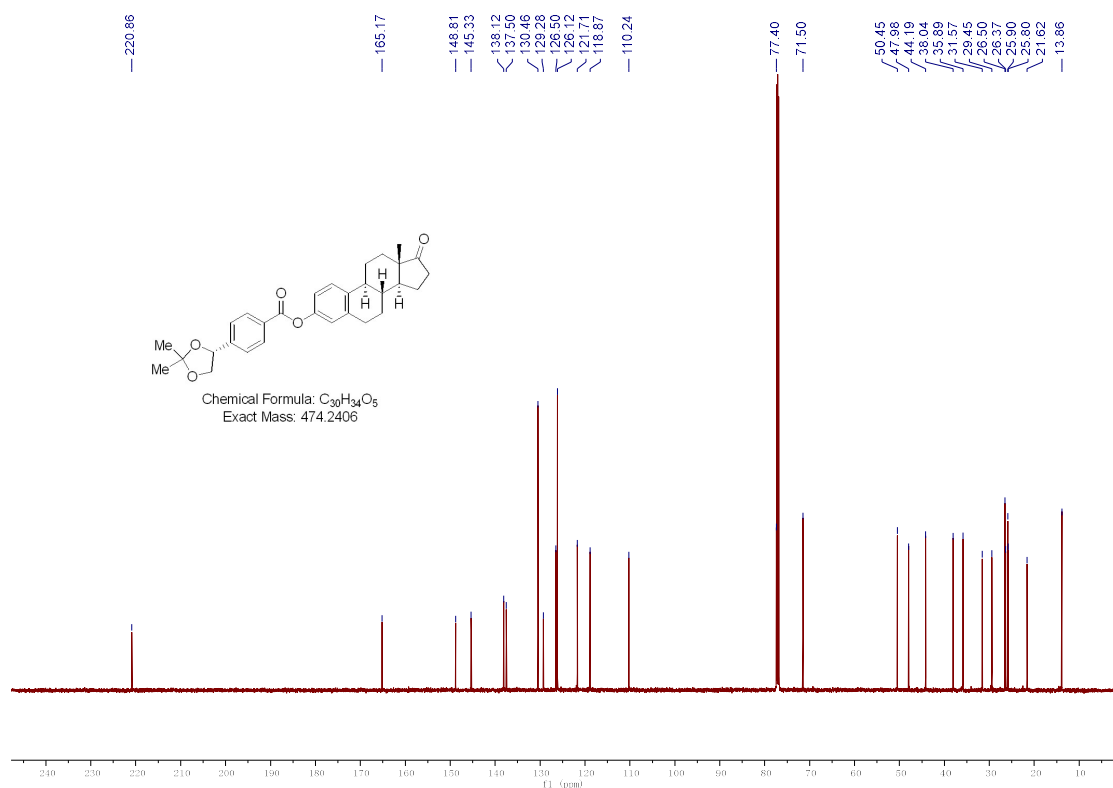

<sup>13</sup>C NMR (151 MHz, CDCl<sub>3</sub>) Spectrum of 3cab

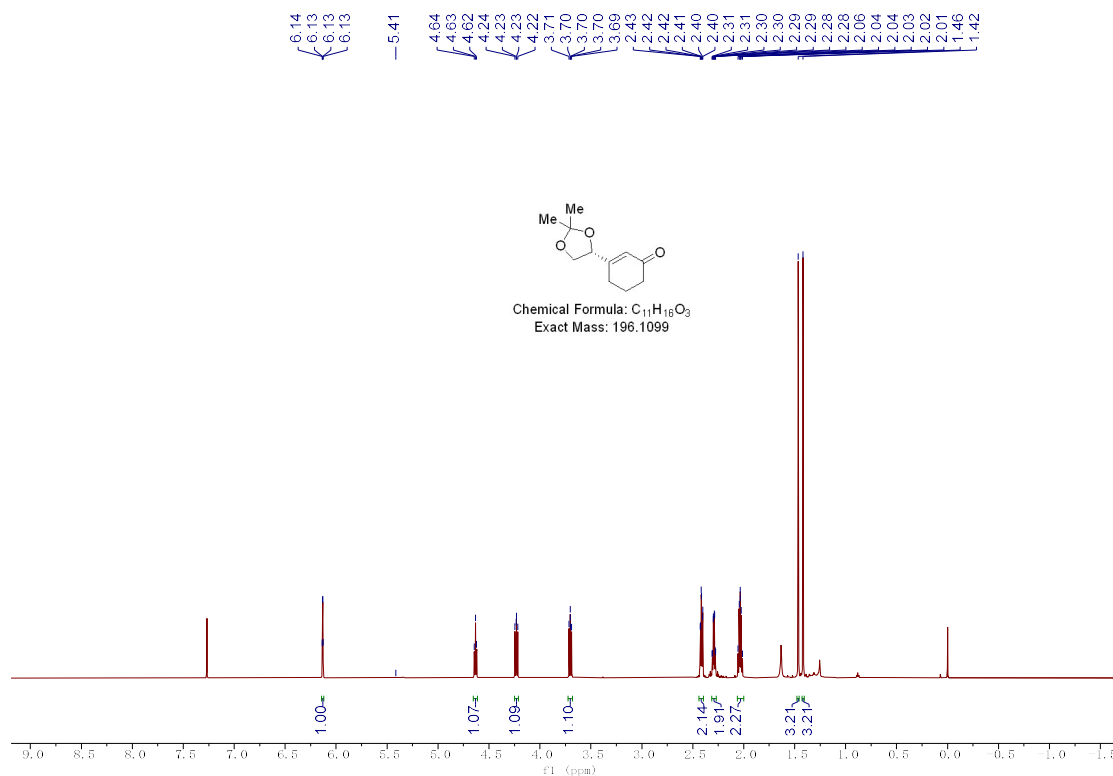

**<sup>1</sup>H NMR (600 MHz, CDCl<sub>3</sub>) Spectrum of 3cac**

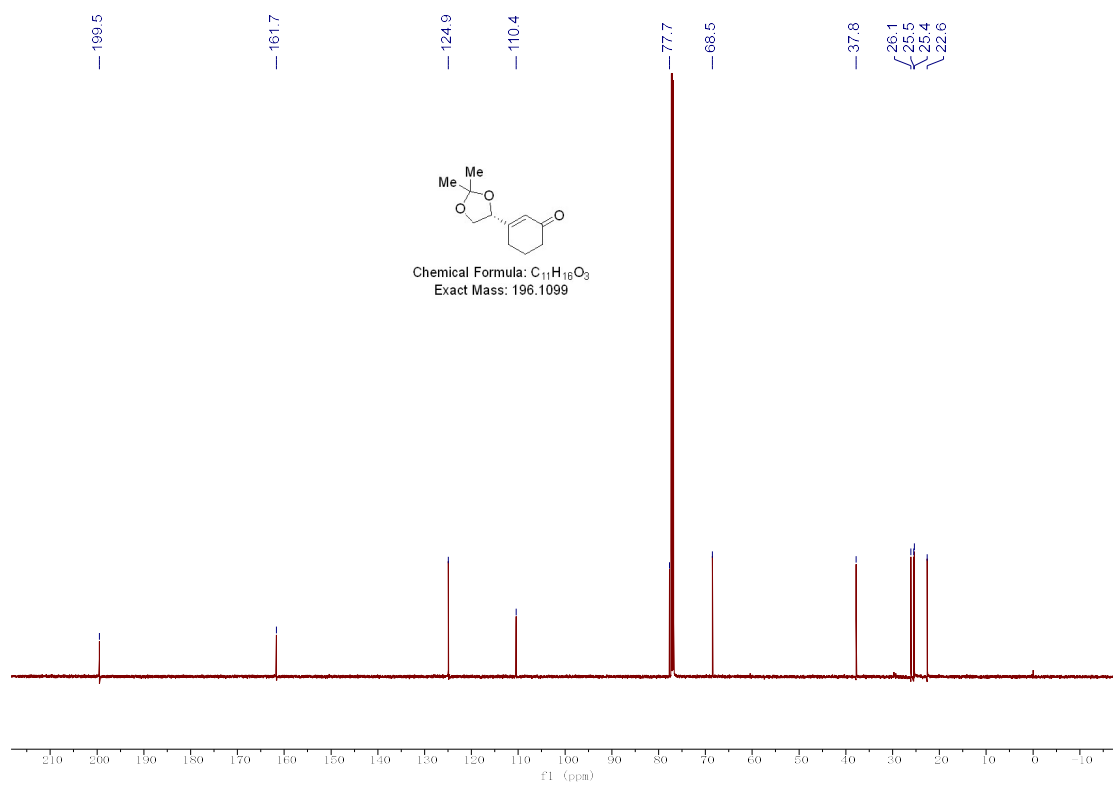

**<sup>13</sup>C NMR (151 MHz, CDCl<sub>3</sub>) Spectrum of 3cac**

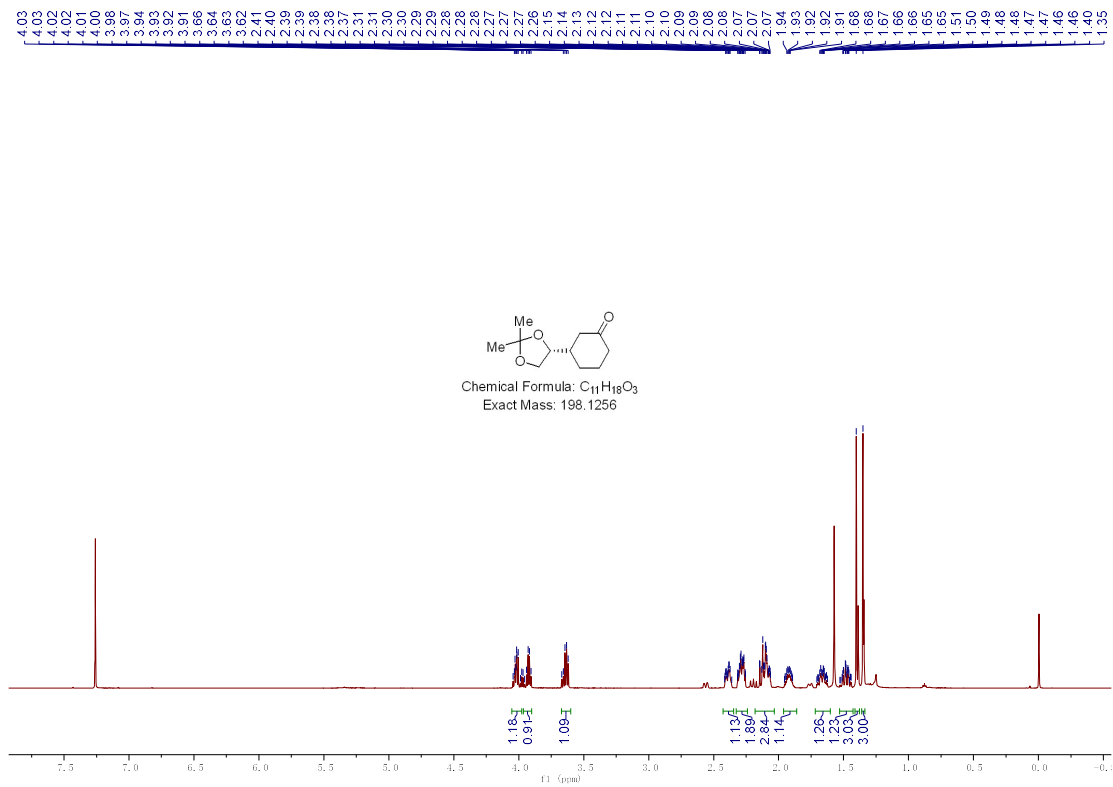

**$^1H$  NMR (600 MHz,  $CDCl_3$ ) Spectrum of 3cad**

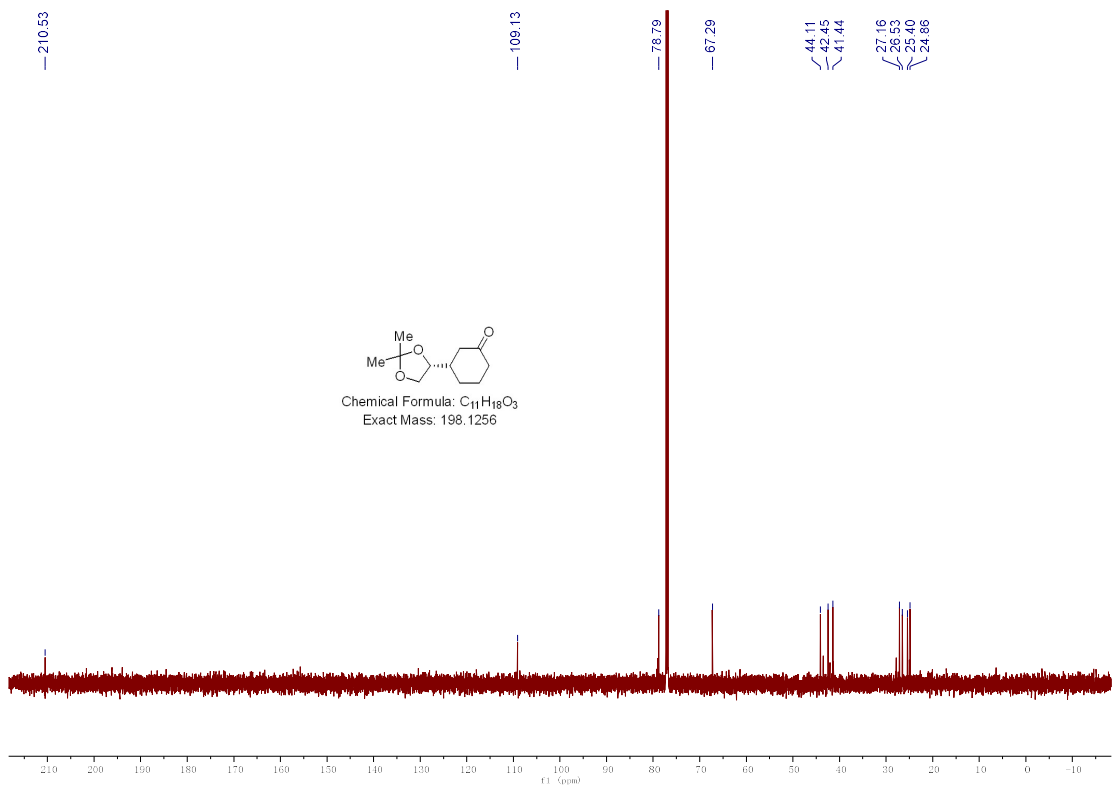

**$^{13}C$  NMR (151 MHz,  $CDCl_3$ ) Spectrum of 3cad**



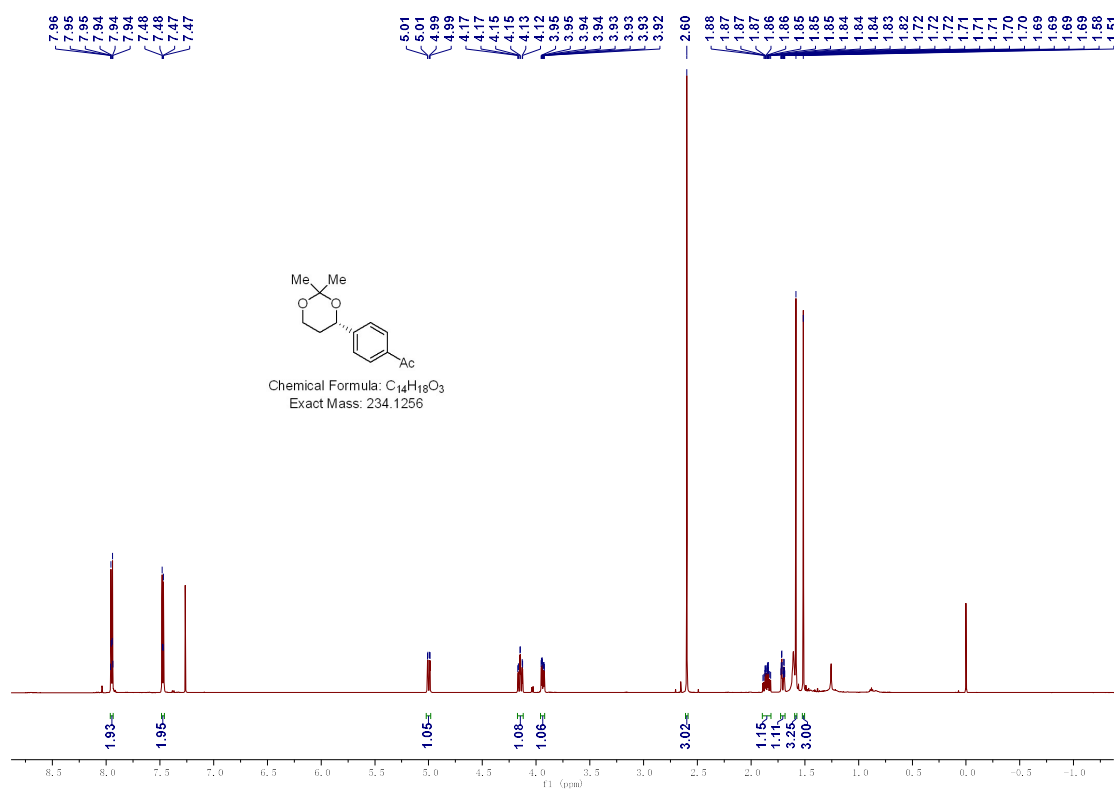

<sup>1</sup>H NMR (600 MHz, CDCl<sub>3</sub>) Spectrum of 5aa

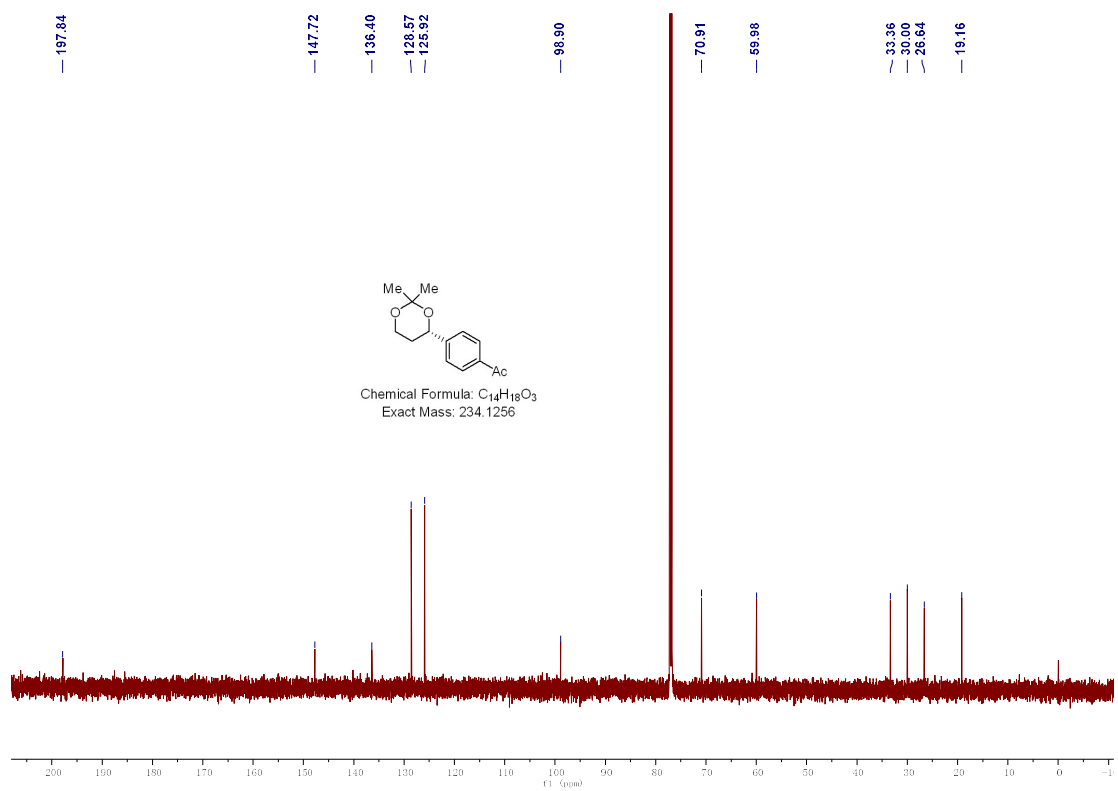

<sup>13</sup>C NMR (151 MHz, CDCl<sub>3</sub>) Spectrum of 5aa

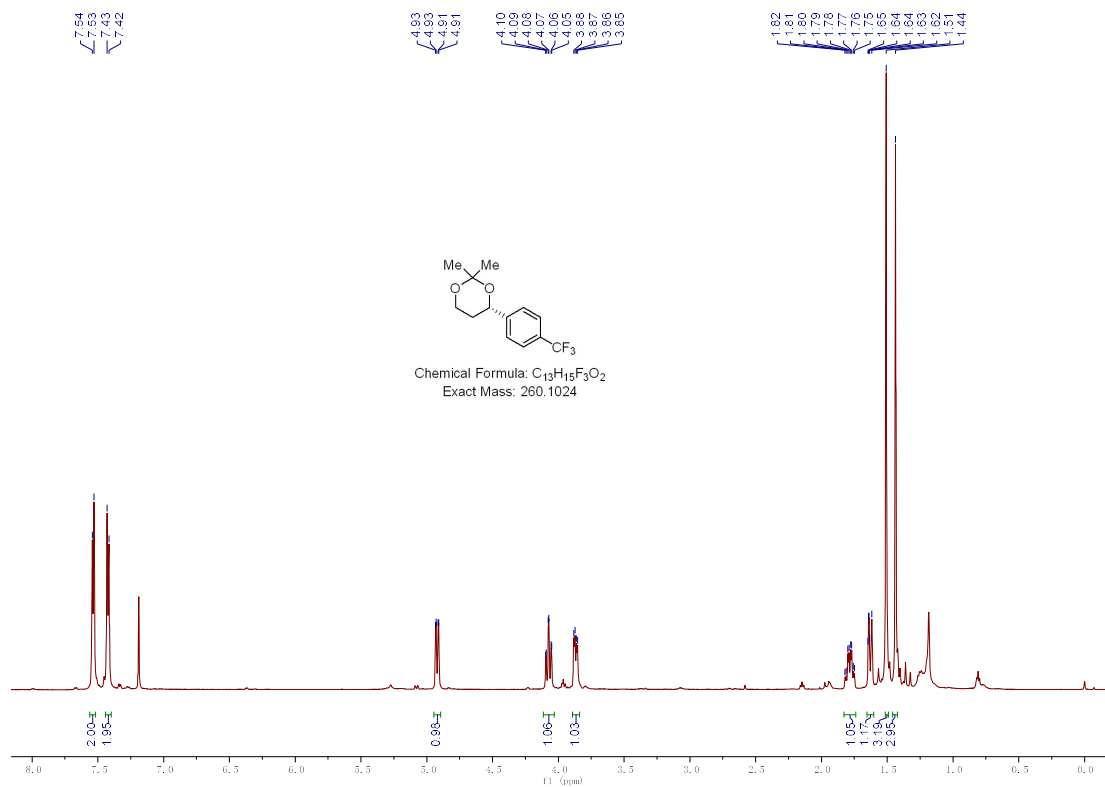

**<sup>1</sup>H NMR (600 MHz, CDCl<sub>3</sub>) Spectrum of 5ac**

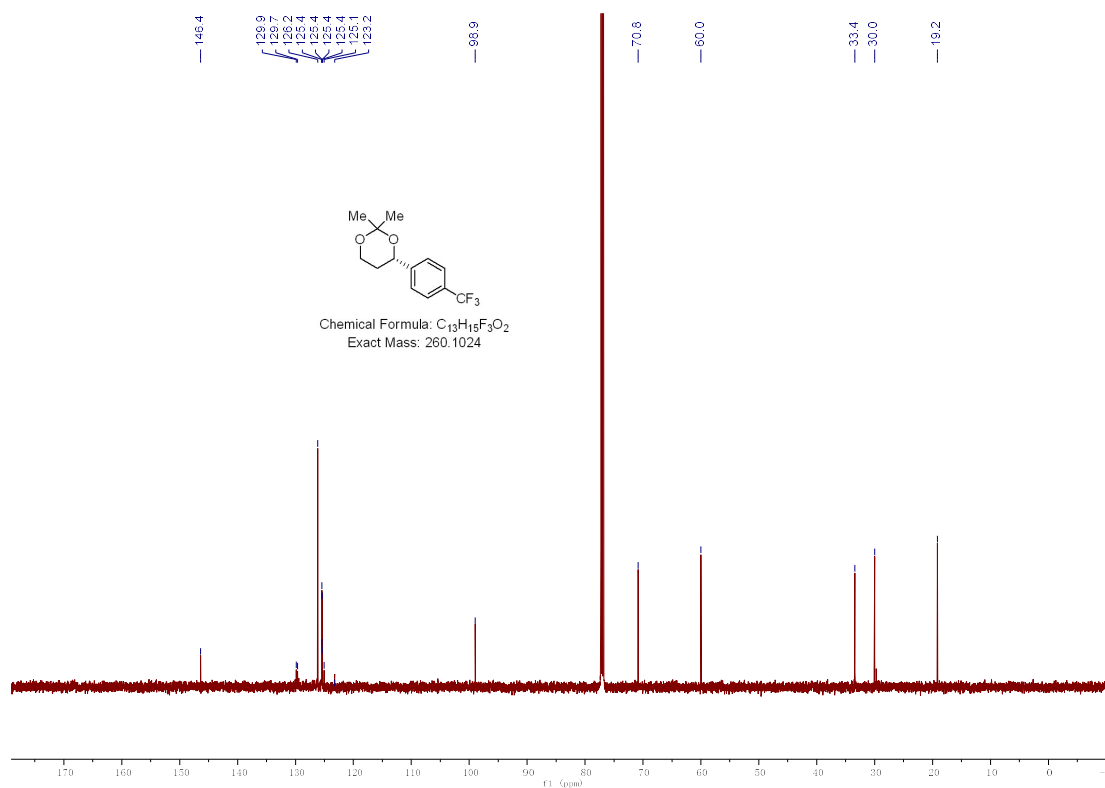

**<sup>13</sup>C NMR (151 MHz, CDCl<sub>3</sub>) Spectrum of 5ac**

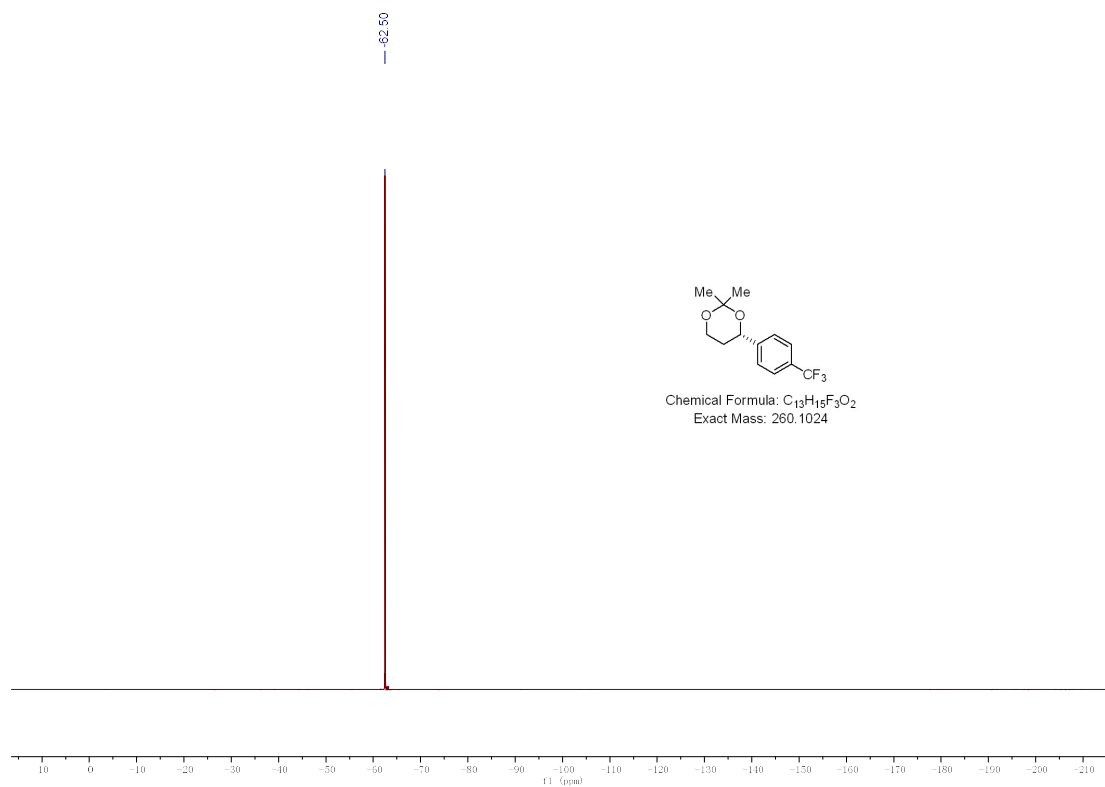

**<sup>19</sup>F NMR (565 MHz, CDCl<sub>3</sub>) Spectrum of 5ac**

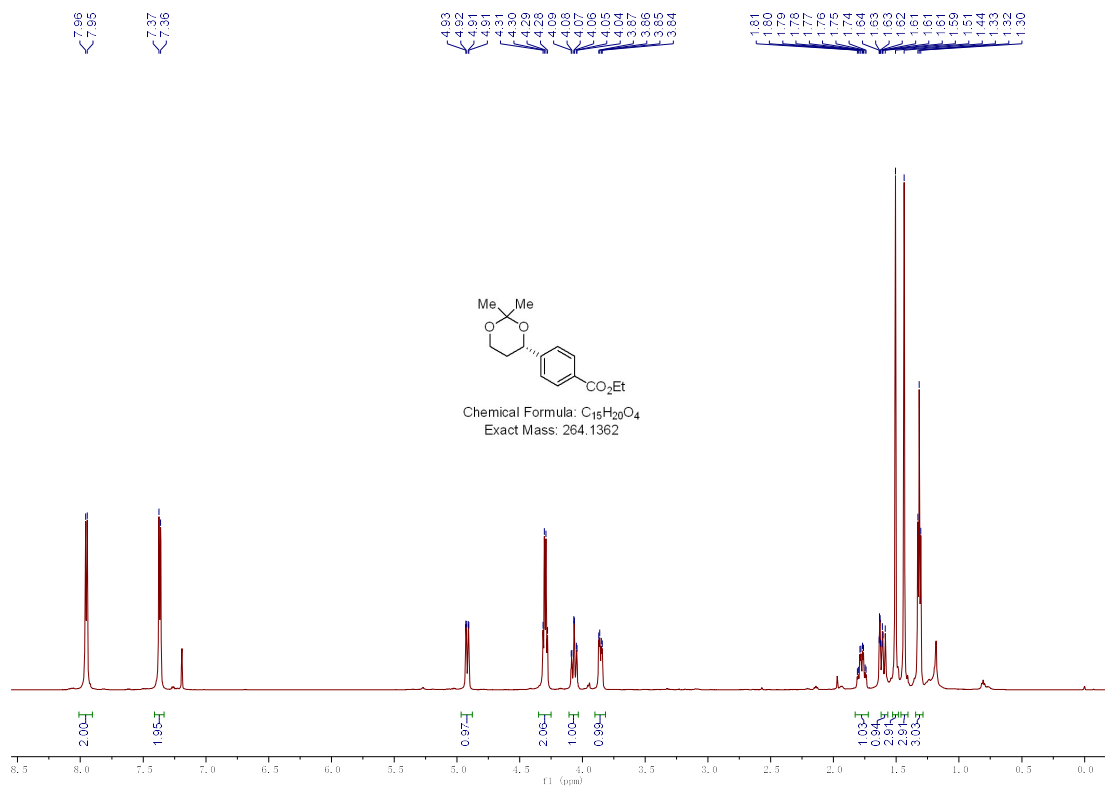

**<sup>1</sup>H NMR (600 MHz, CDCl<sub>3</sub>) Spectrum of 5ad**

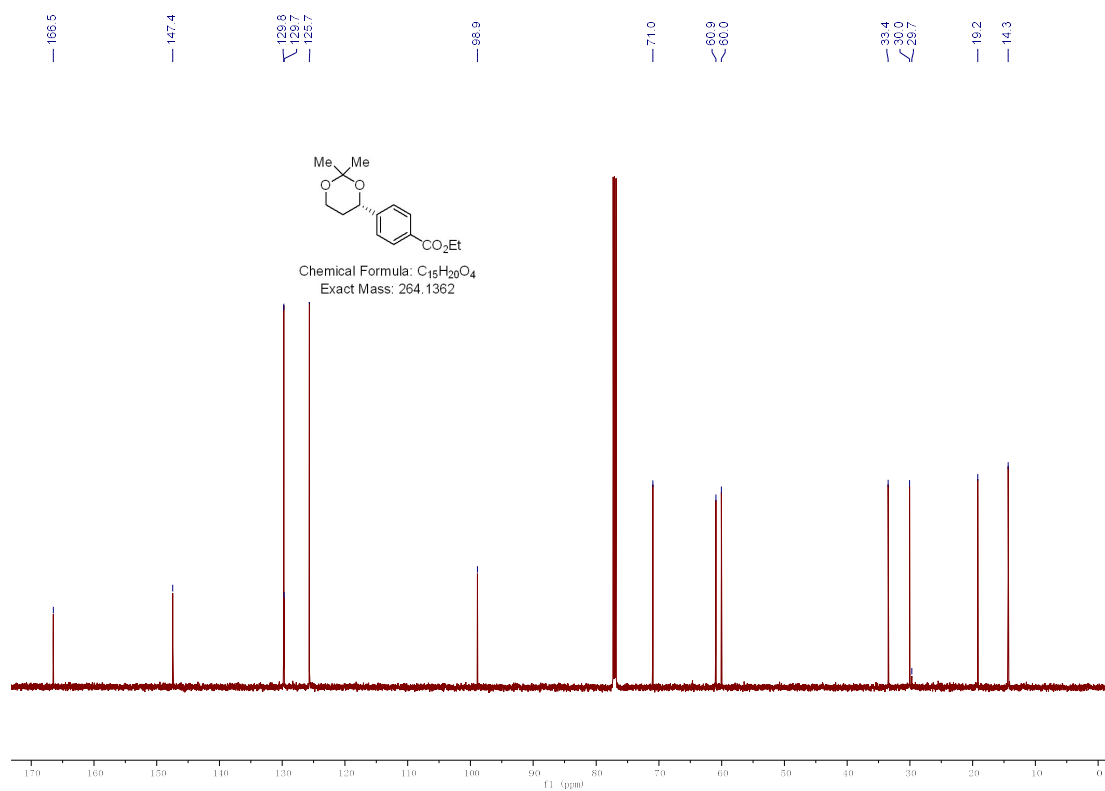

**<sup>13</sup>C NMR (151 MHz, CDCl<sub>3</sub>) Spectrum of 5ad**

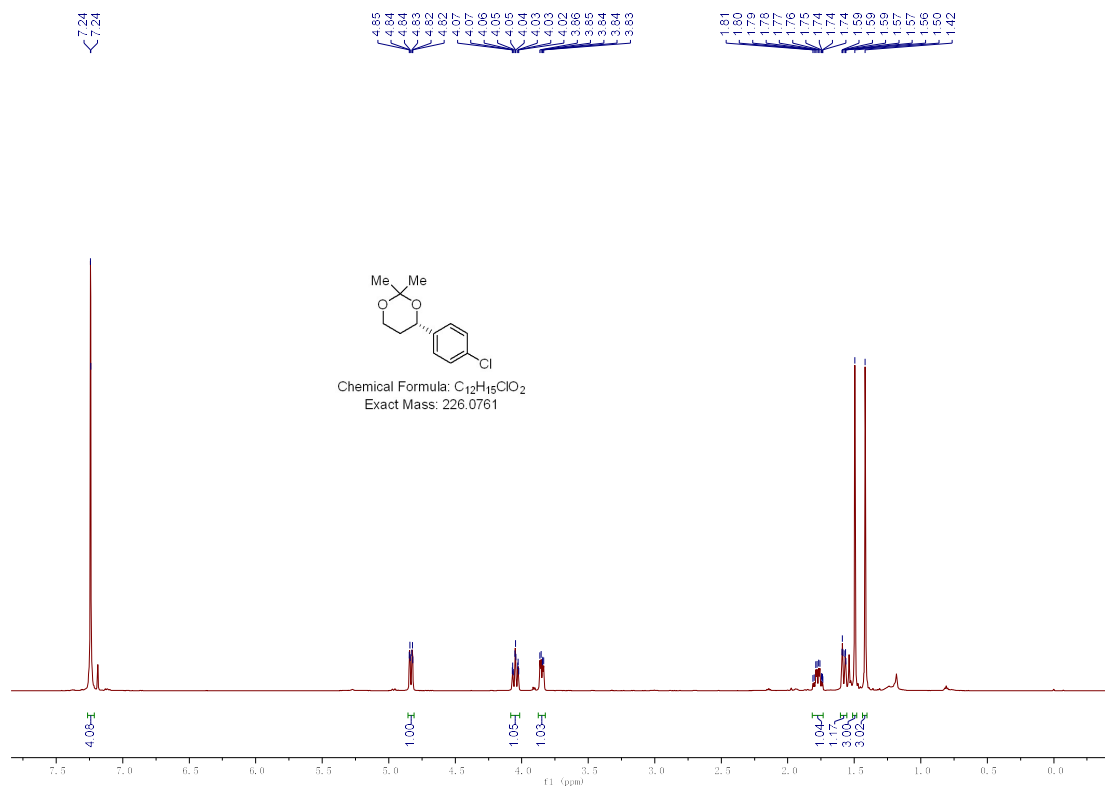

**<sup>1</sup>H NMR (600 MHz, CDCl<sub>3</sub>) Spectrum of 5af**

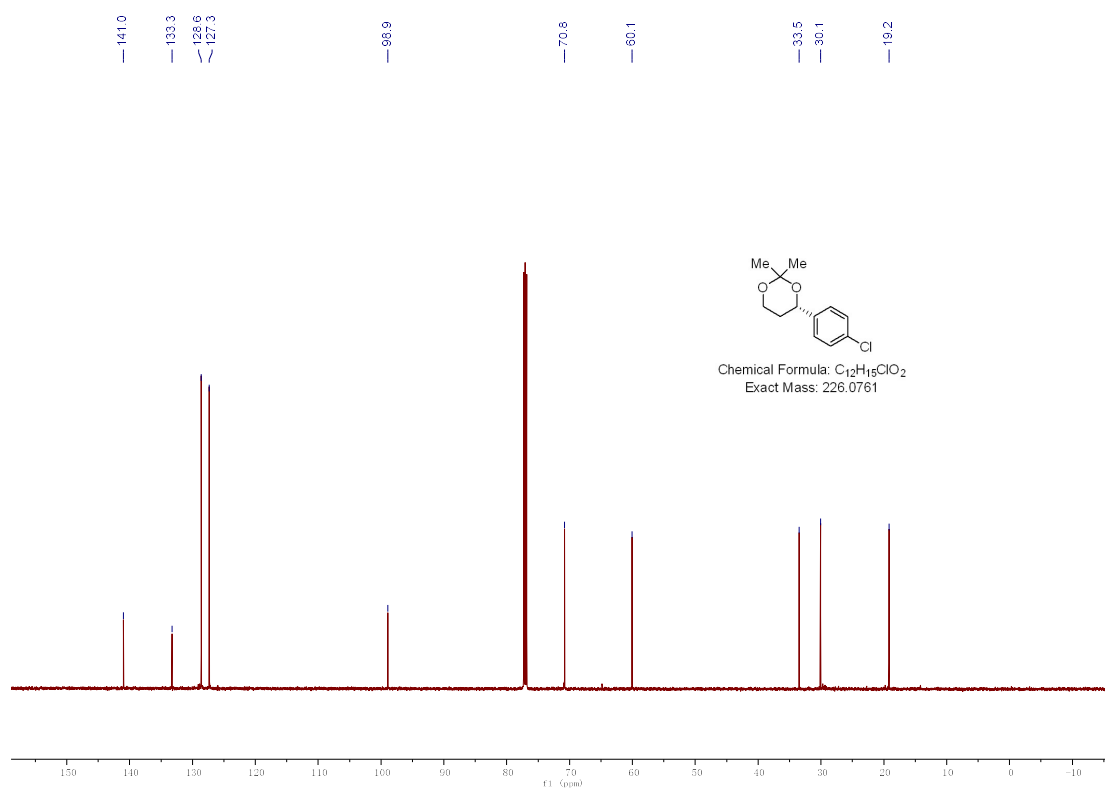

**<sup>13</sup>C NMR (151 MHz, CDCl<sub>3</sub>) Spectrum of 5af**

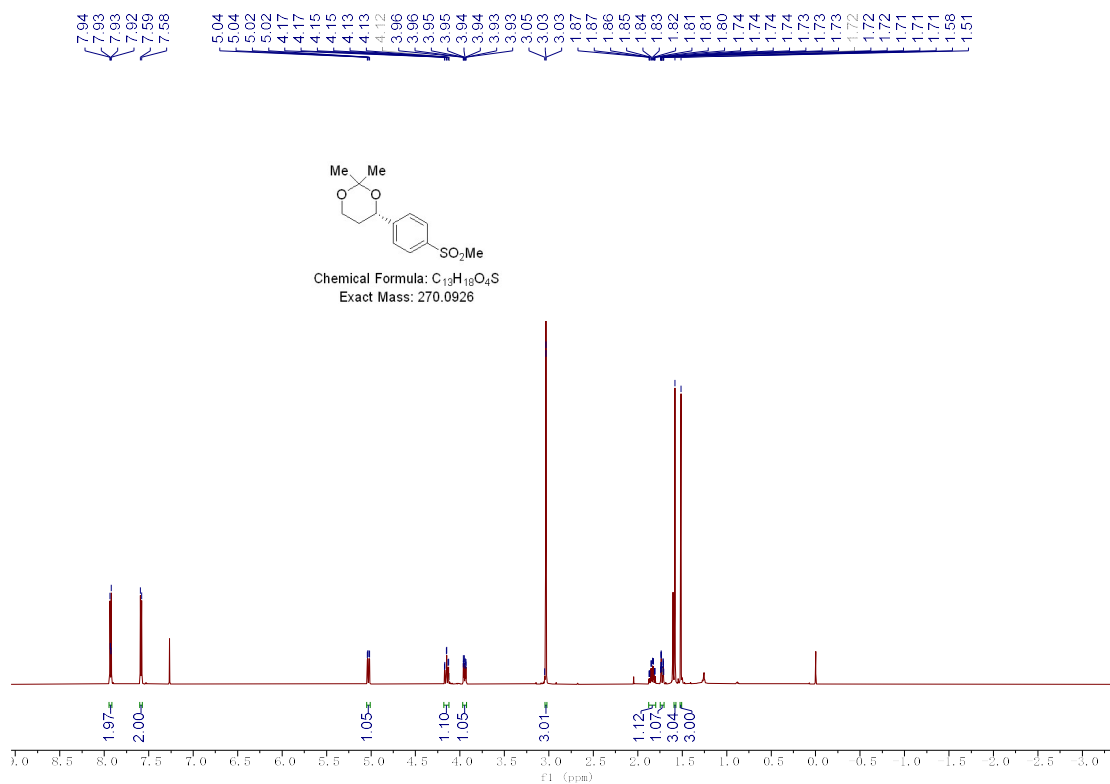

**<sup>1</sup>H NMR (600 MHz, CDCl<sub>3</sub>) Spectrum of 5ag**

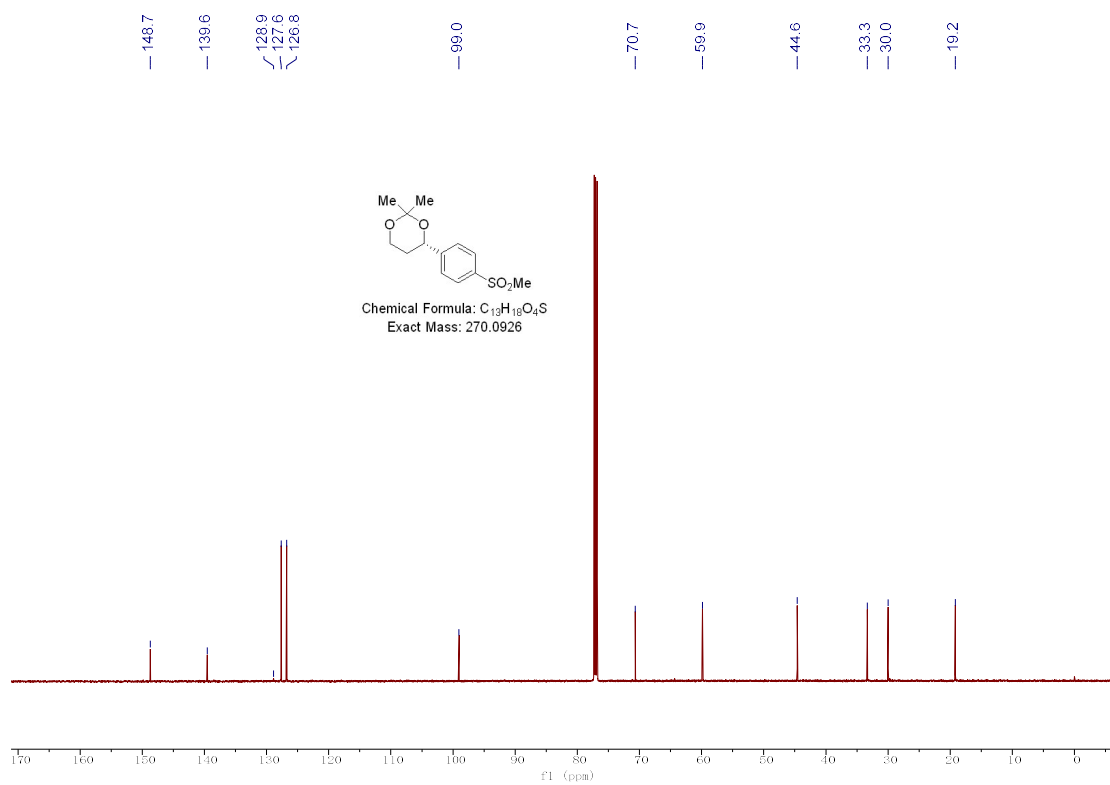

**<sup>13</sup>C NMR (151 MHz, CDCl<sub>3</sub>) Spectrum of 5ag**

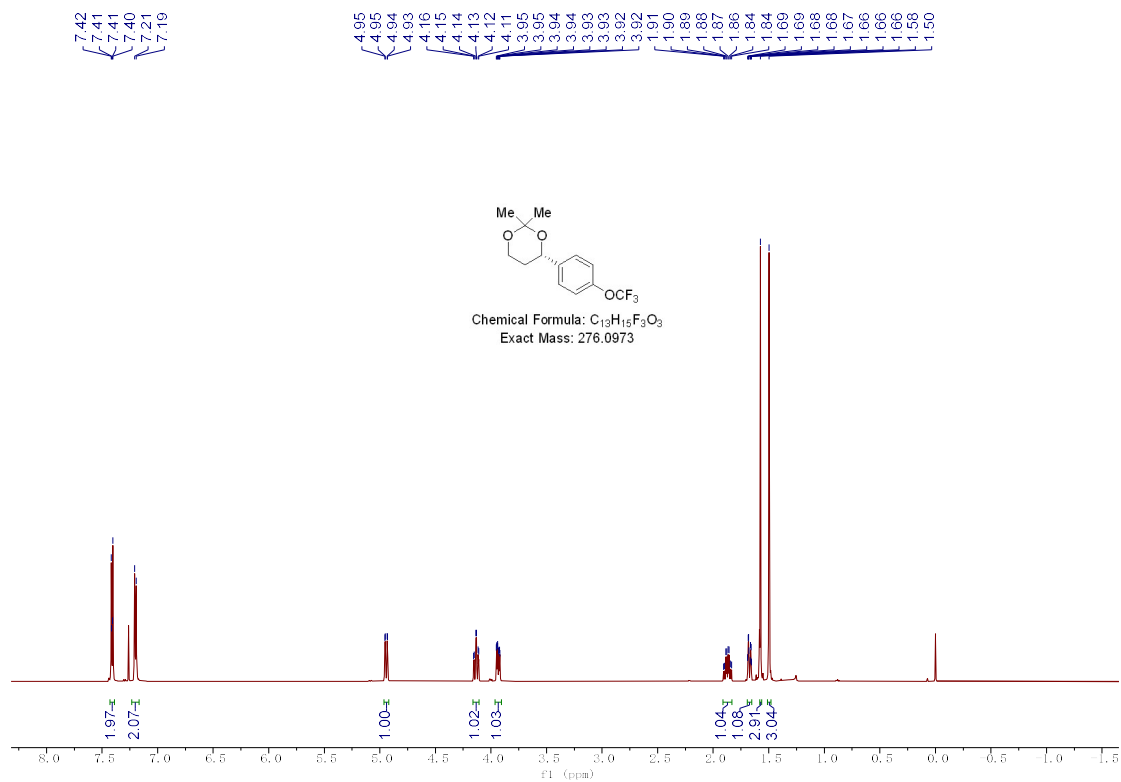

**$^1H$  NMR (600 MHz,  $CDCl_3$ ) Spectrum of 5ai**

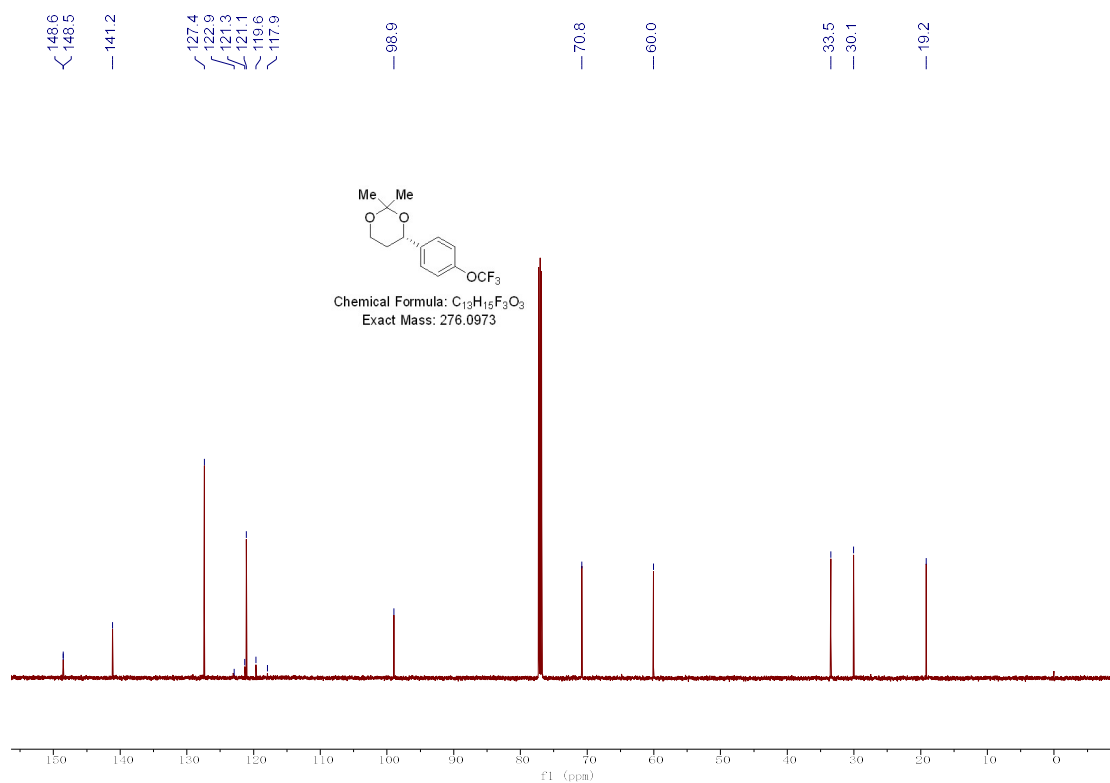

**$^{13}C$  NMR (151 MHz,  $CDCl_3$ ) Spectrum of 5ai**

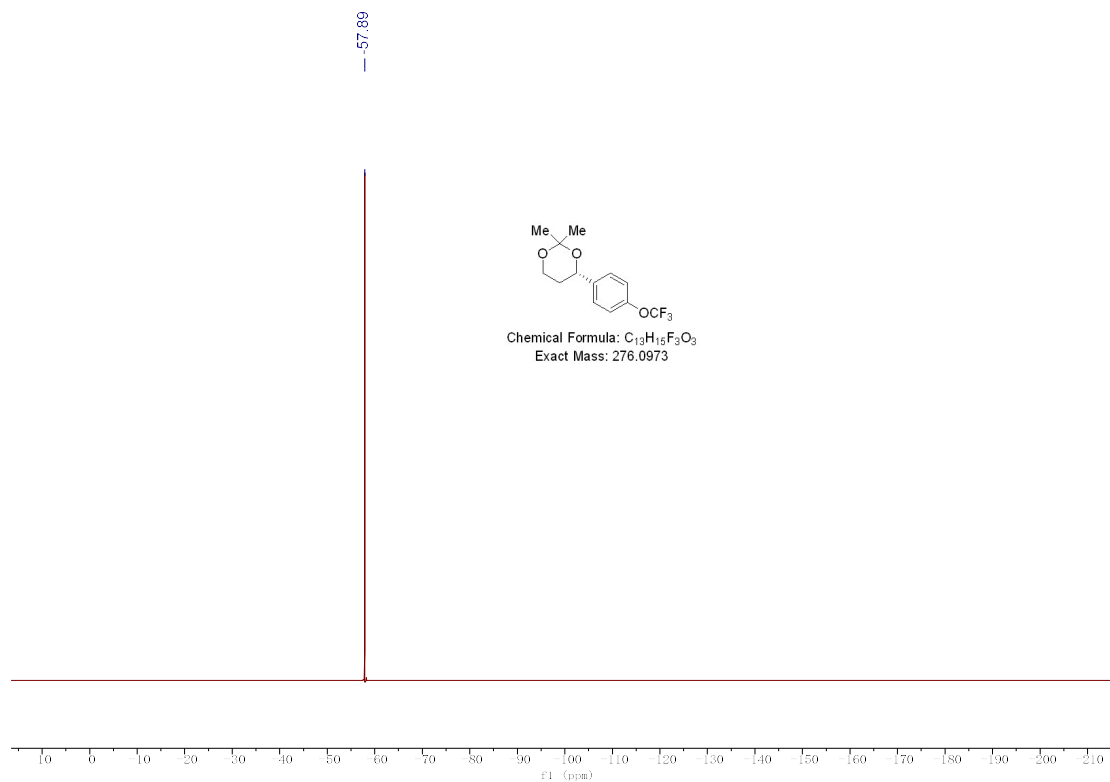

**$^{19}\text{F}$  NMR (565 MHz,  $\text{CDCl}_3$ ) Spectrum of 5ai**



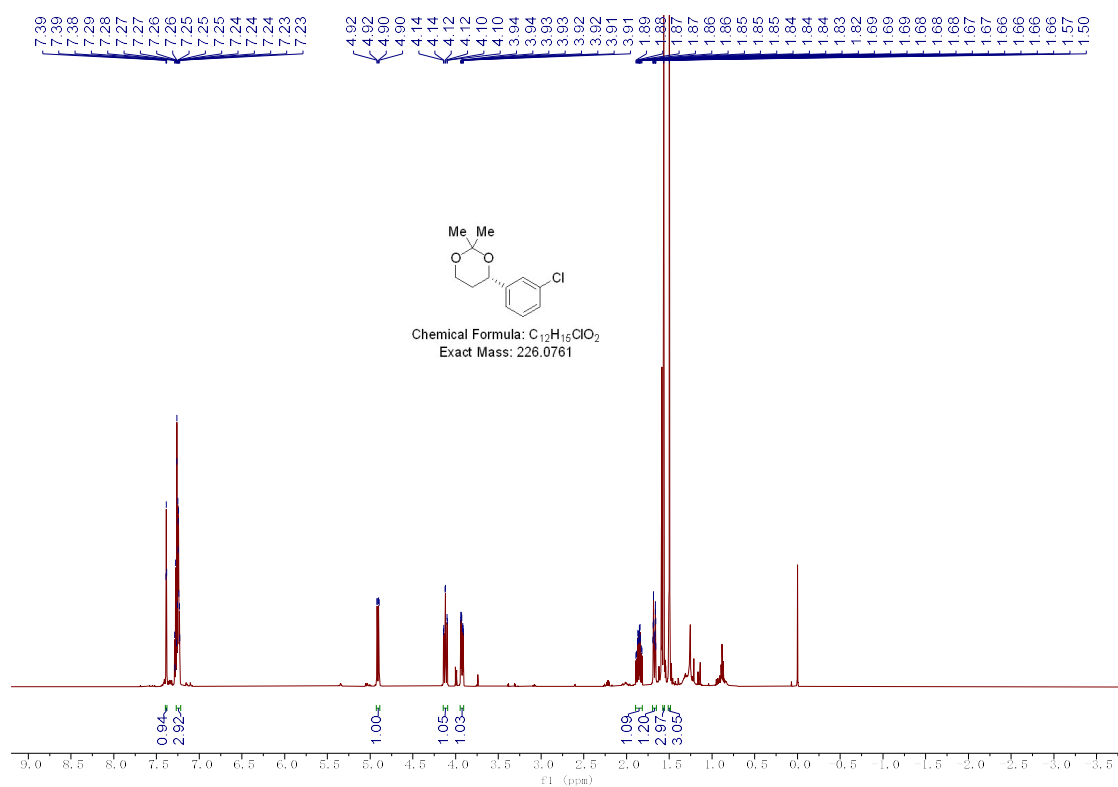

**<sup>1</sup>H NMR (600 MHz, CDCl<sub>3</sub>) Spectrum of 5al**

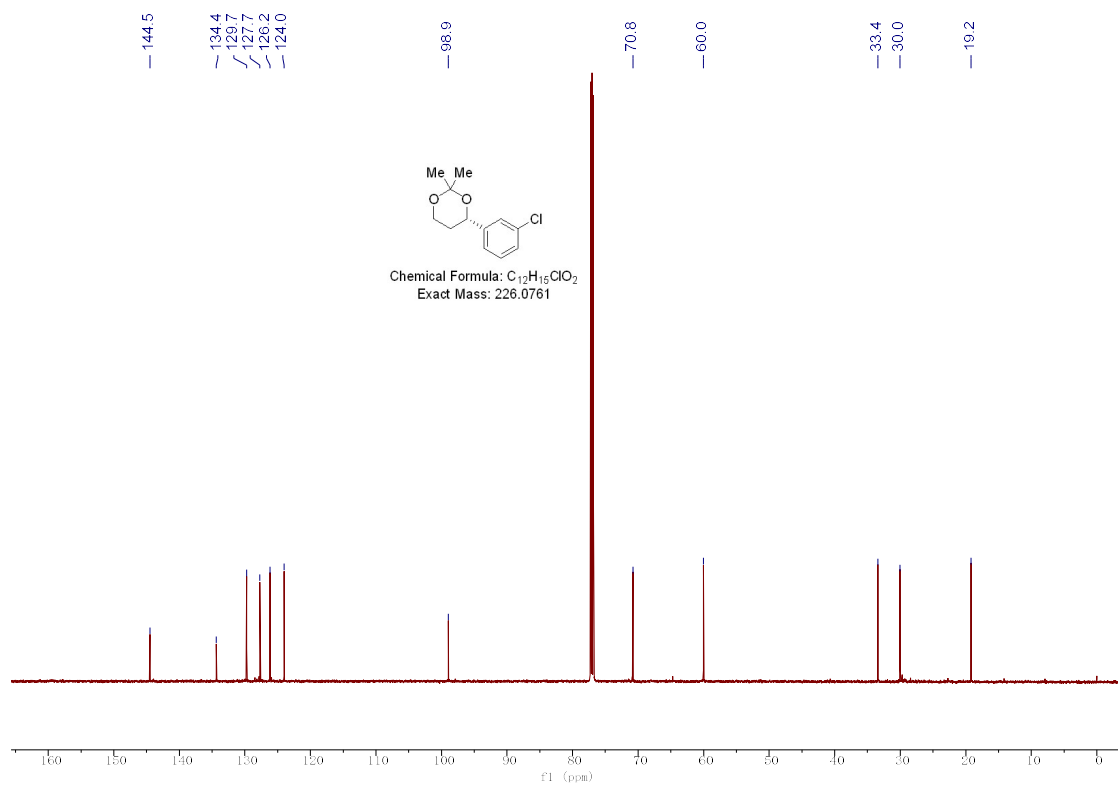

**<sup>13</sup>C NMR (151 MHz, CDCl<sub>3</sub>) Spectrum of 5al**

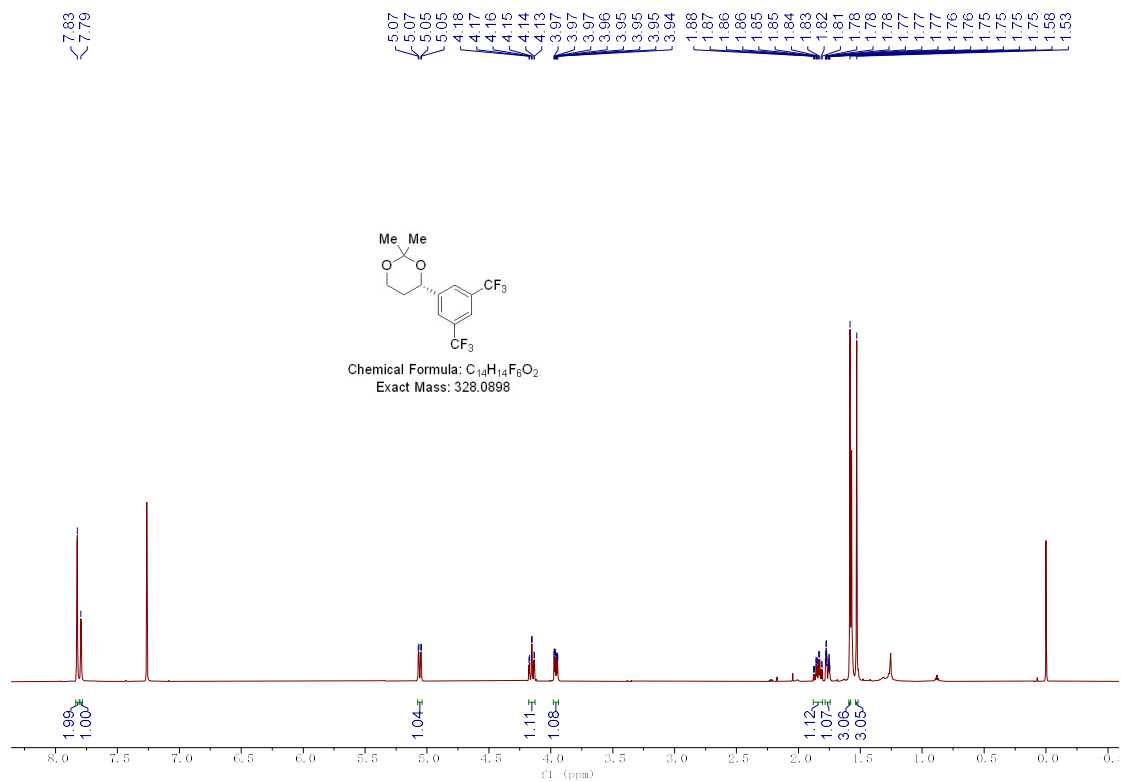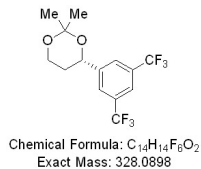

**<sup>1</sup>H NMR (600 MHz, CDCl<sub>3</sub>) Spectrum of 5ao**

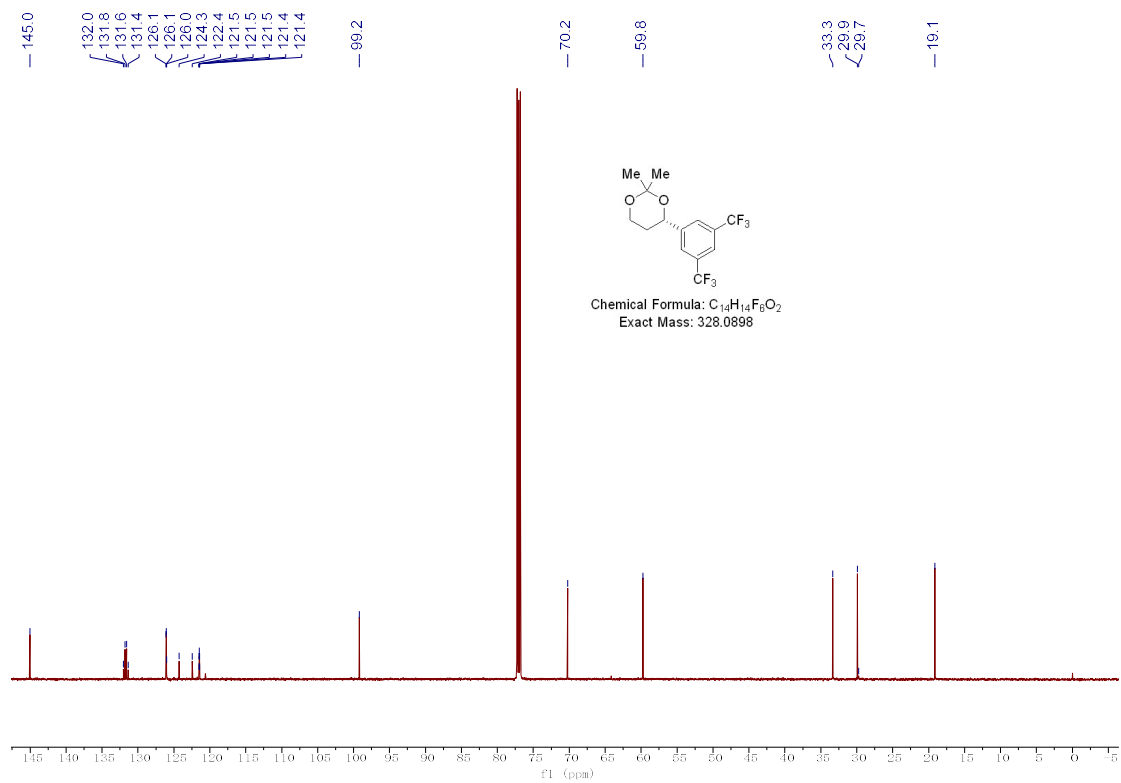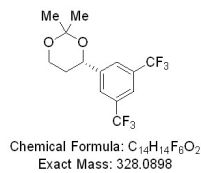

**<sup>13</sup>C NMR (151 MHz, CDCl<sub>3</sub>) Spectrum of 5ao**

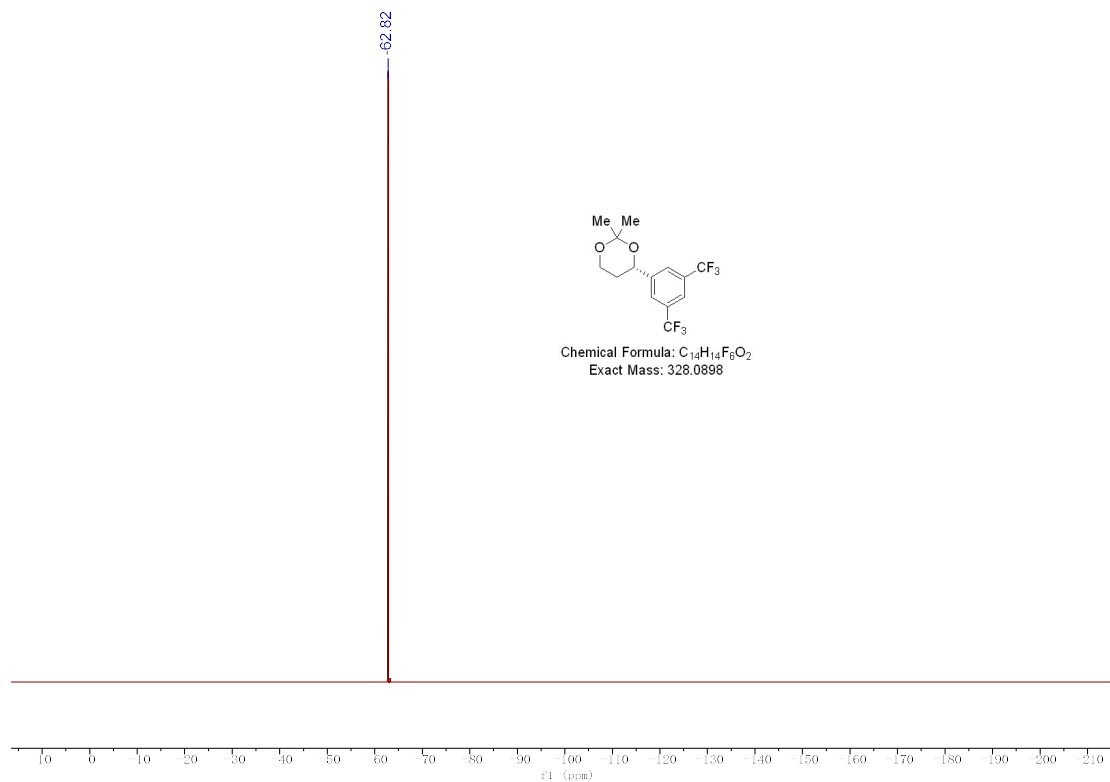

**$^{19}\text{F}$  NMR (565 MHz,  $\text{CDCl}_3$ ) Spectrum of 5ao**

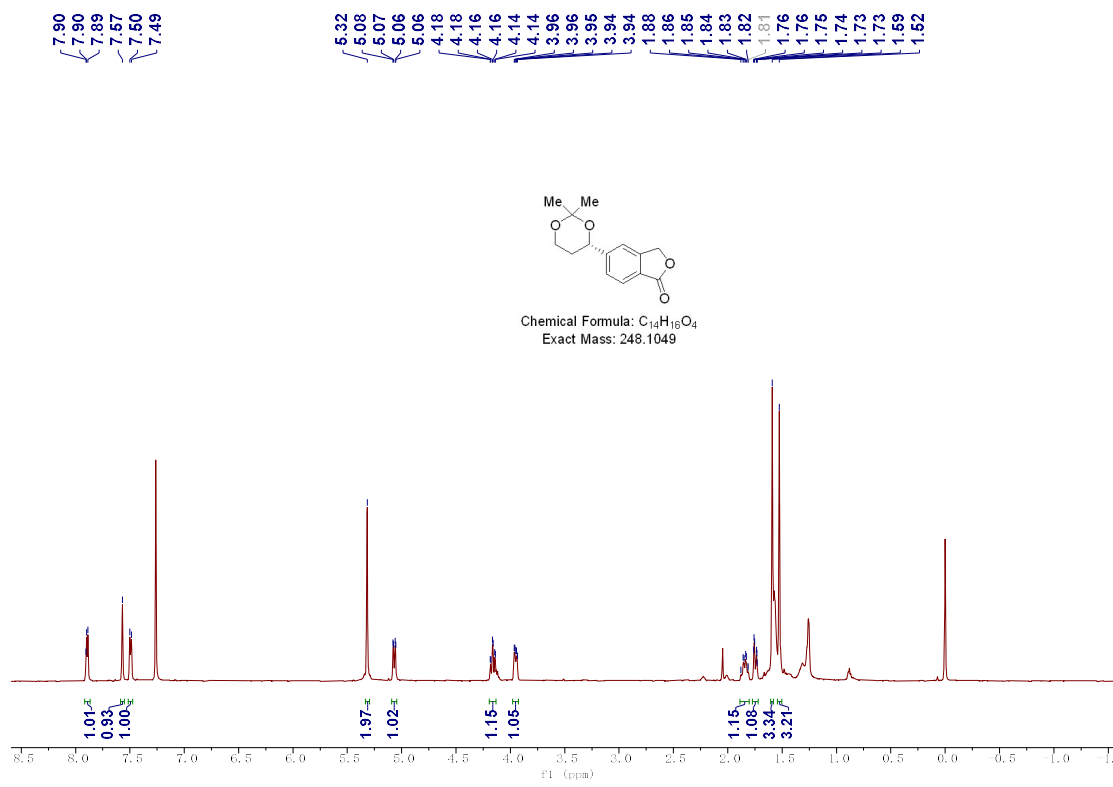

**<sup>1</sup>H NMR (600 MHz, CDCl<sub>3</sub>) Spectrum of 5aq**

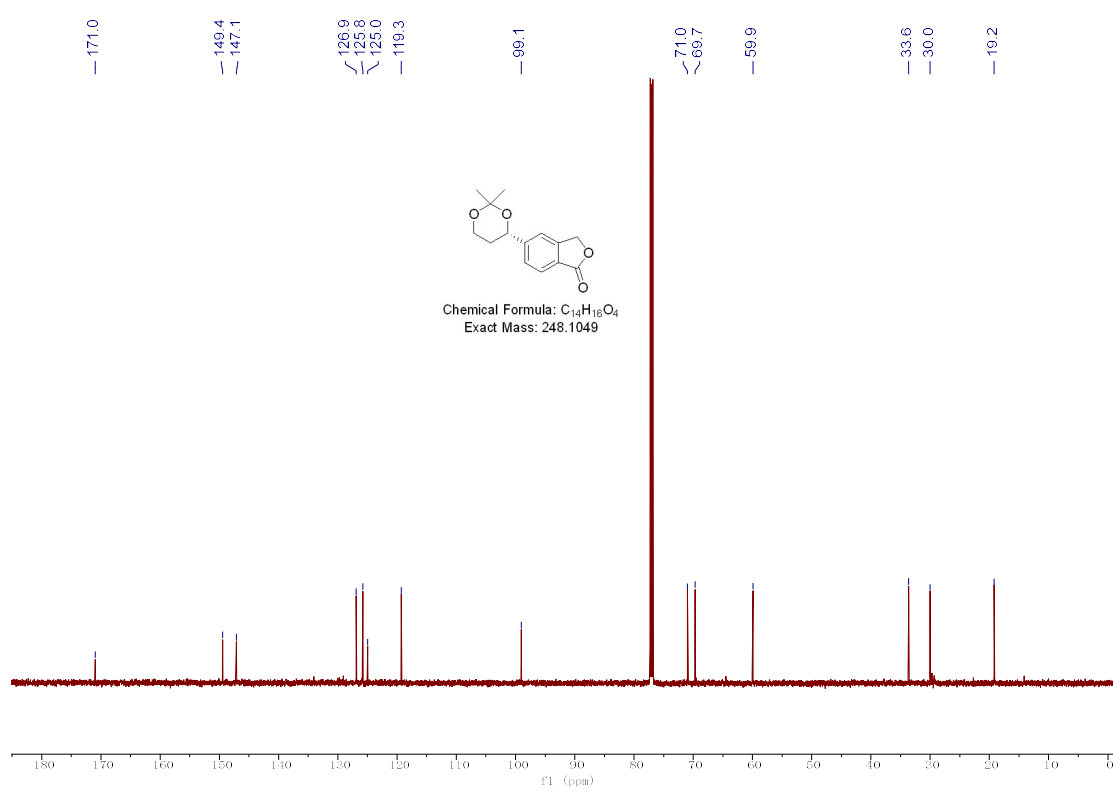

**<sup>13</sup>C NMR (151 MHz, CDCl<sub>3</sub>) Spectrum of 5aq**

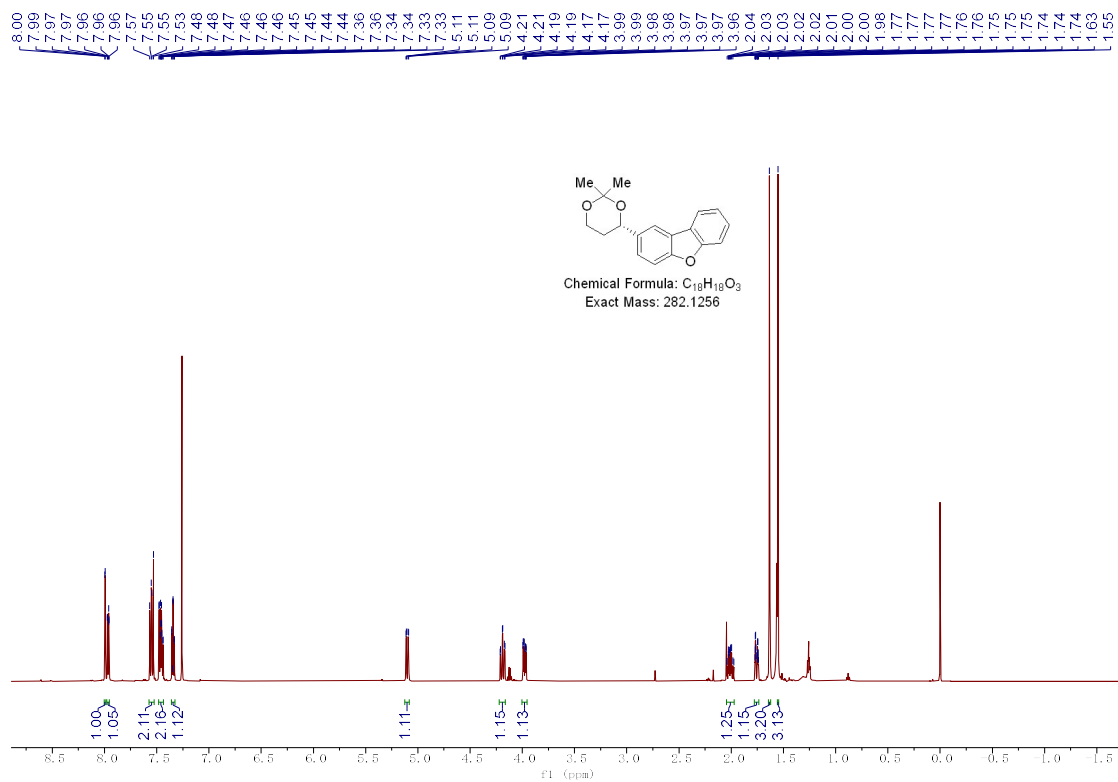

<sup>1</sup>H NMR (600 MHz, CDCl<sub>3</sub>) Spectrum of 5as

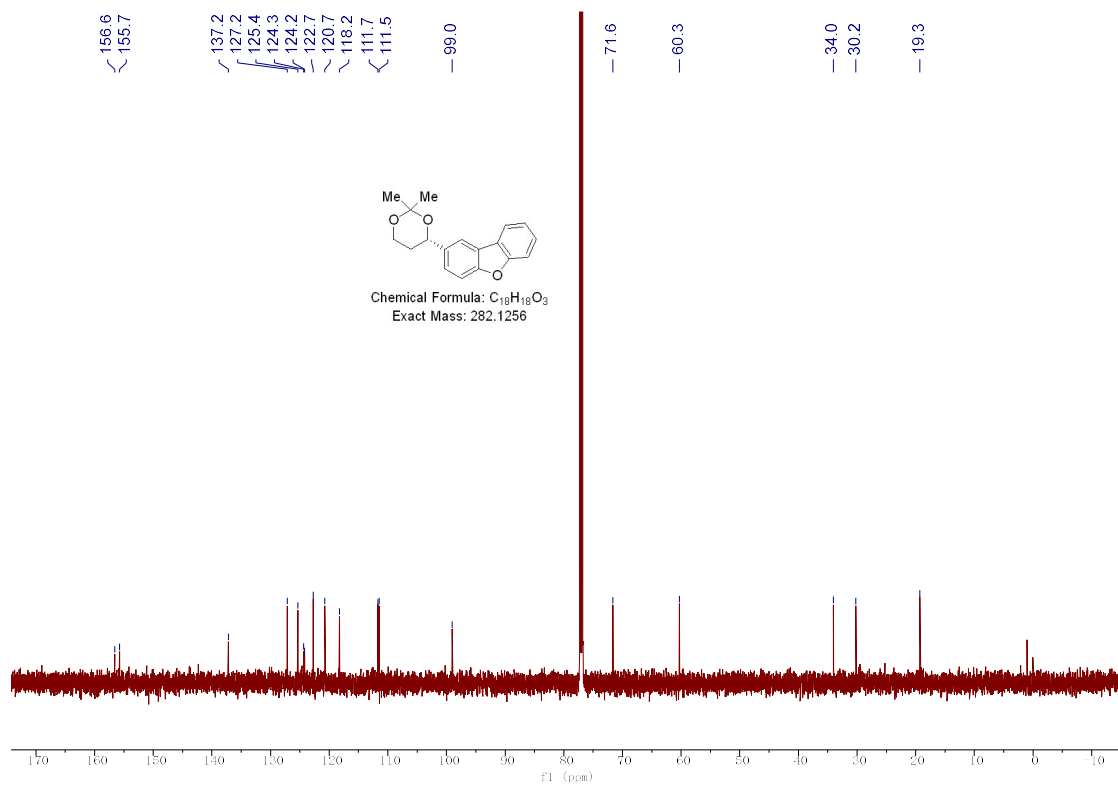

<sup>13</sup>C NMR (151 MHz, CDCl<sub>3</sub>) Spectrum of 5as

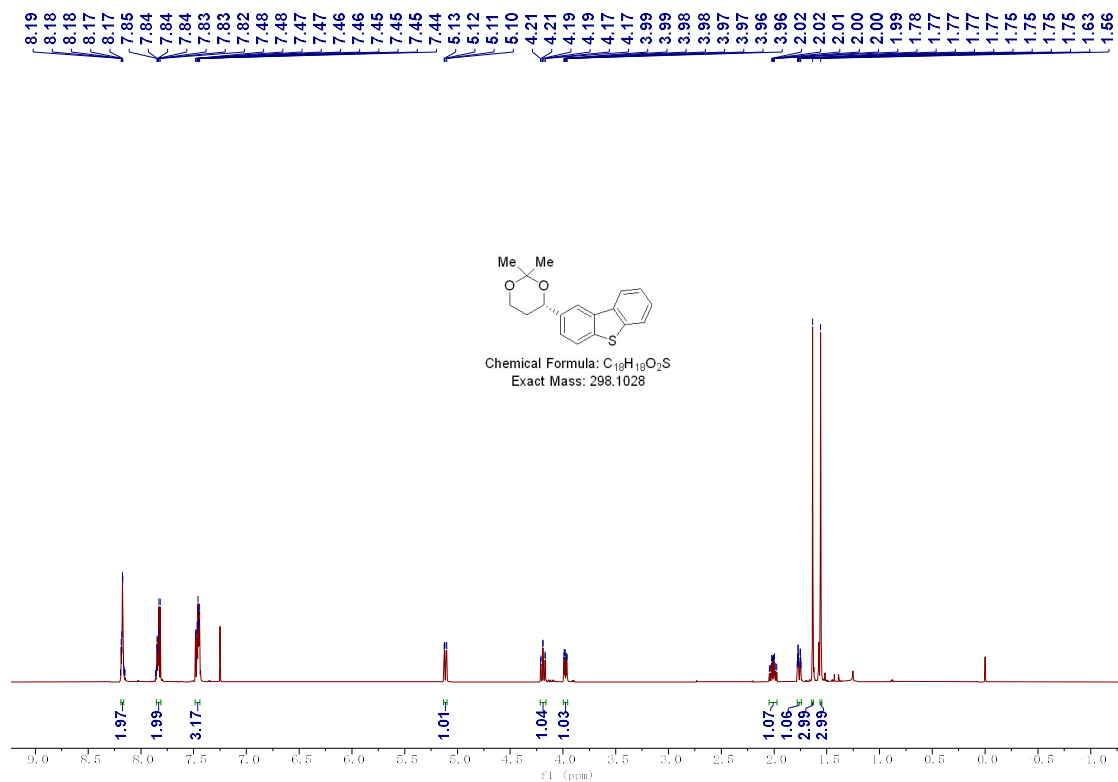

**<sup>1</sup>H NMR (600 MHz, CDCl<sub>3</sub>) Spectrum of 5at**

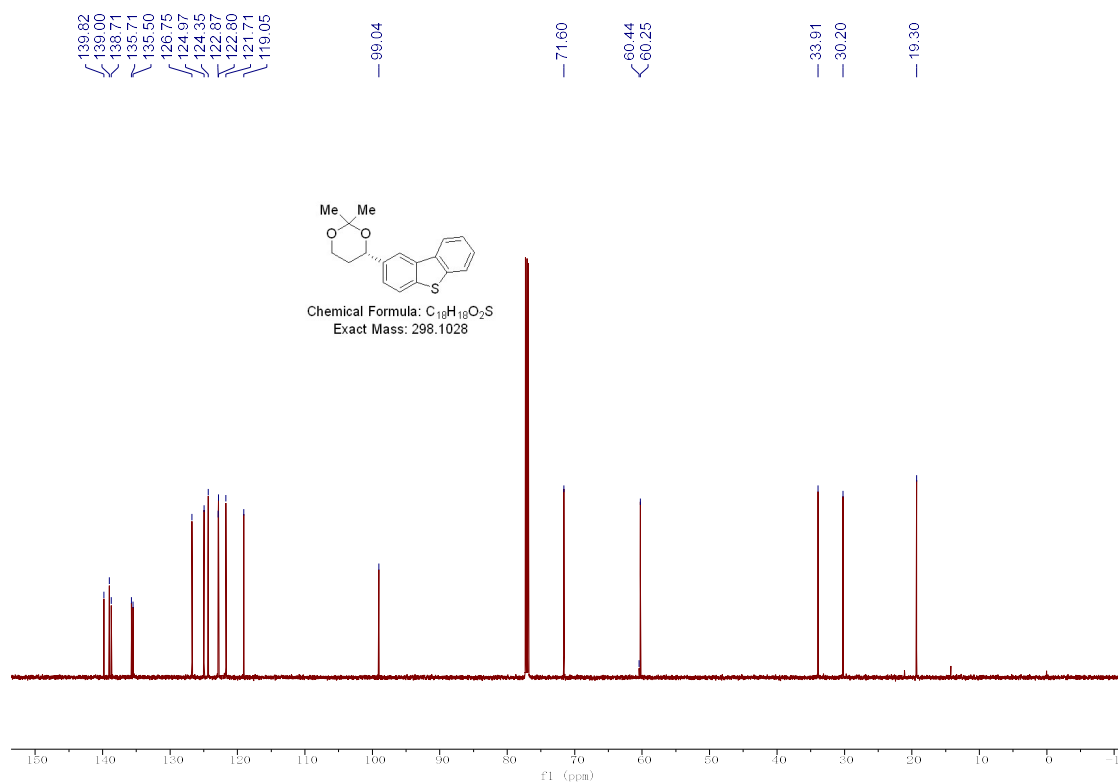

**<sup>13</sup>C NMR (151 MHz, CDCl<sub>3</sub>) Spectrum of 5at**

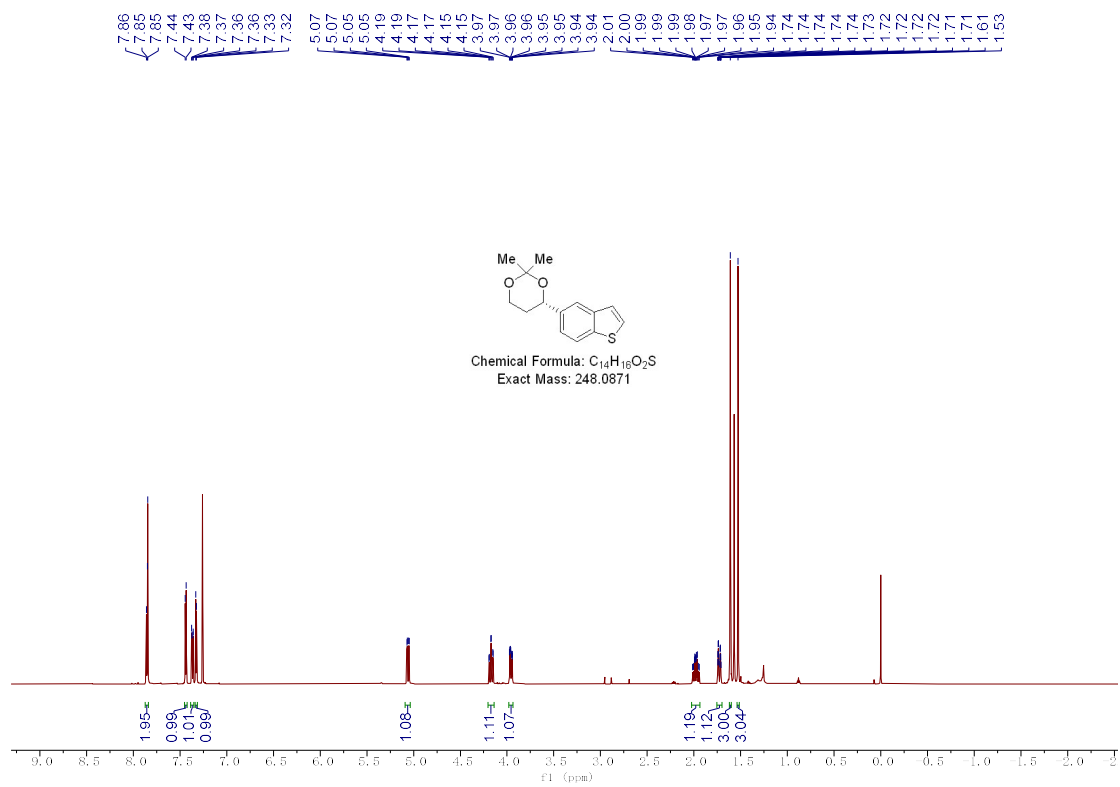

**<sup>1</sup>H NMR (600 MHz, CDCl<sub>3</sub>) Spectrum of 5au**

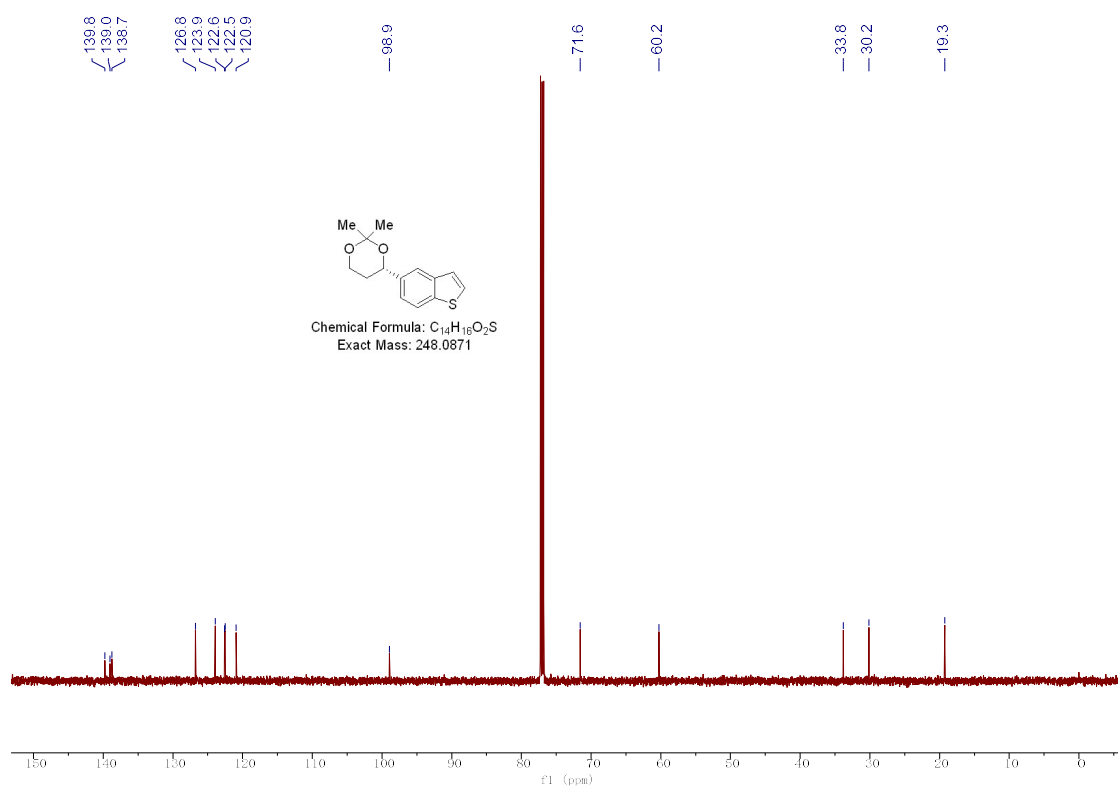

**<sup>13</sup>C NMR (151 MHz, CDCl<sub>3</sub>) Spectrum of 5au**

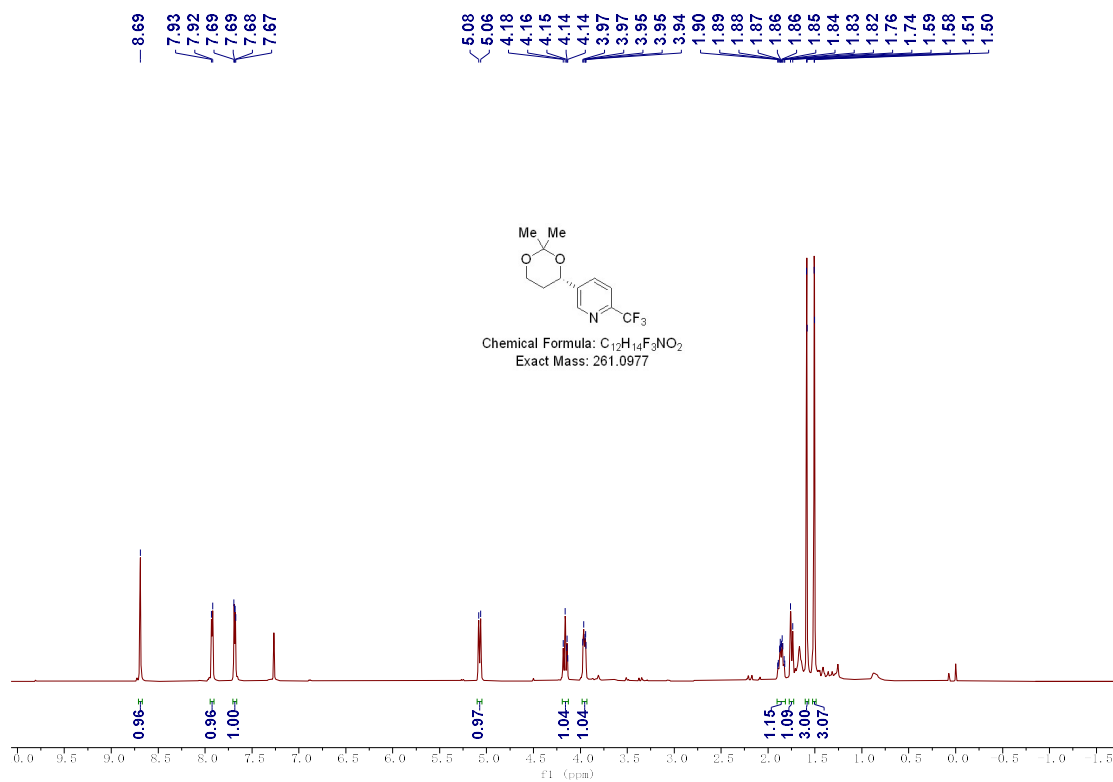

**$^1H$  NMR (600 MHz,  $CDCl_3$ ) Spectrum of 5av**

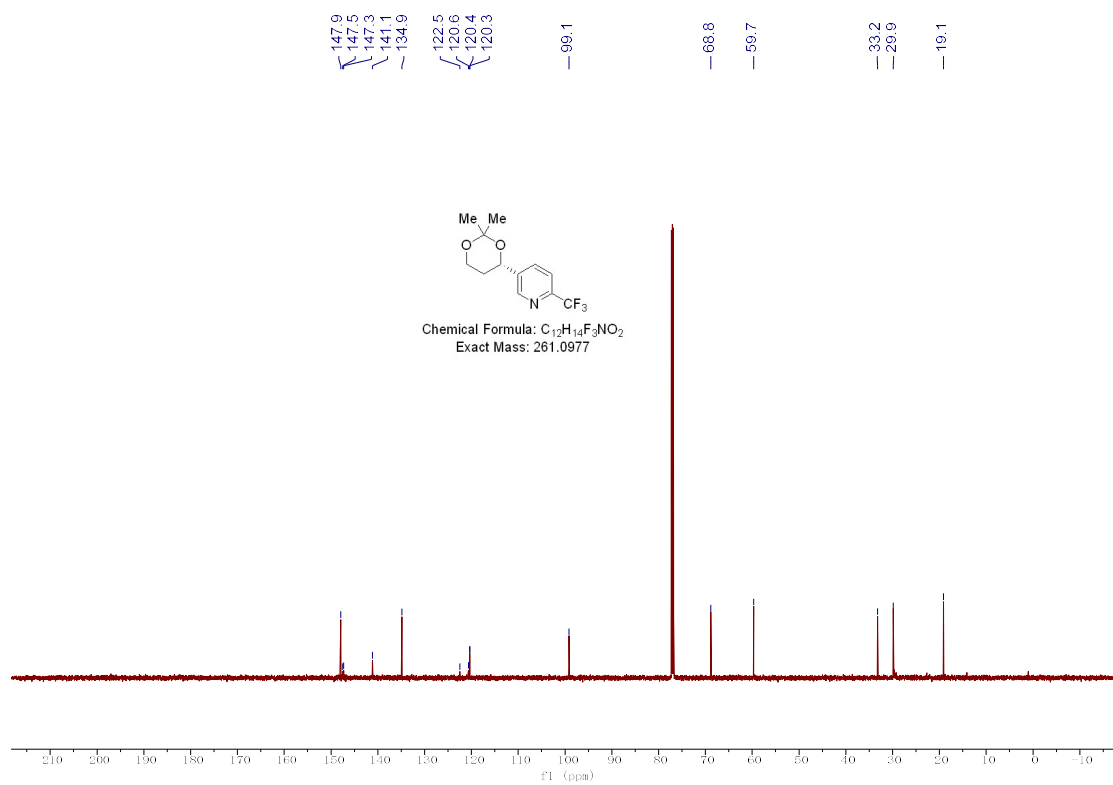

**$^{13}C$  NMR (151 MHz,  $CDCl_3$ ) Spectrum of 5av**



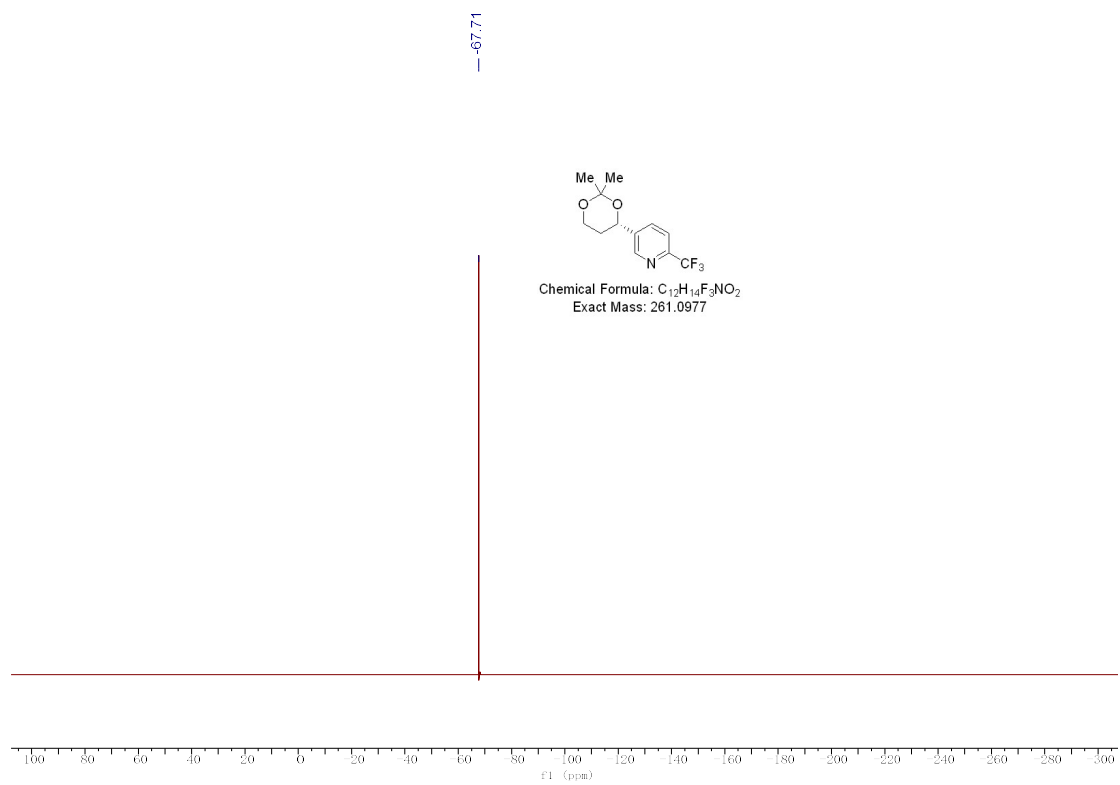

**<sup>19</sup>F NMR (565 MHz, CDCl<sub>3</sub>) Spectrum of 5av**

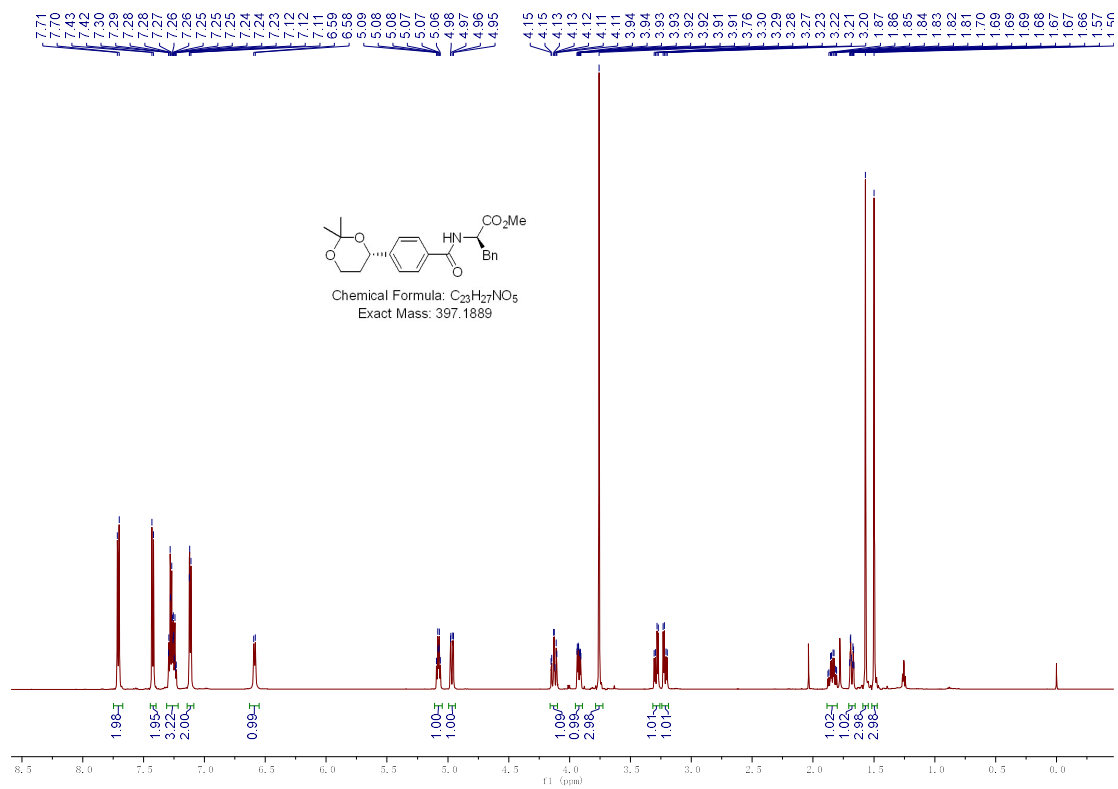

**$^1\text{H}$  NMR (600 MHz,  $\text{CDCl}_3$ ) Spectrum of 5ax**

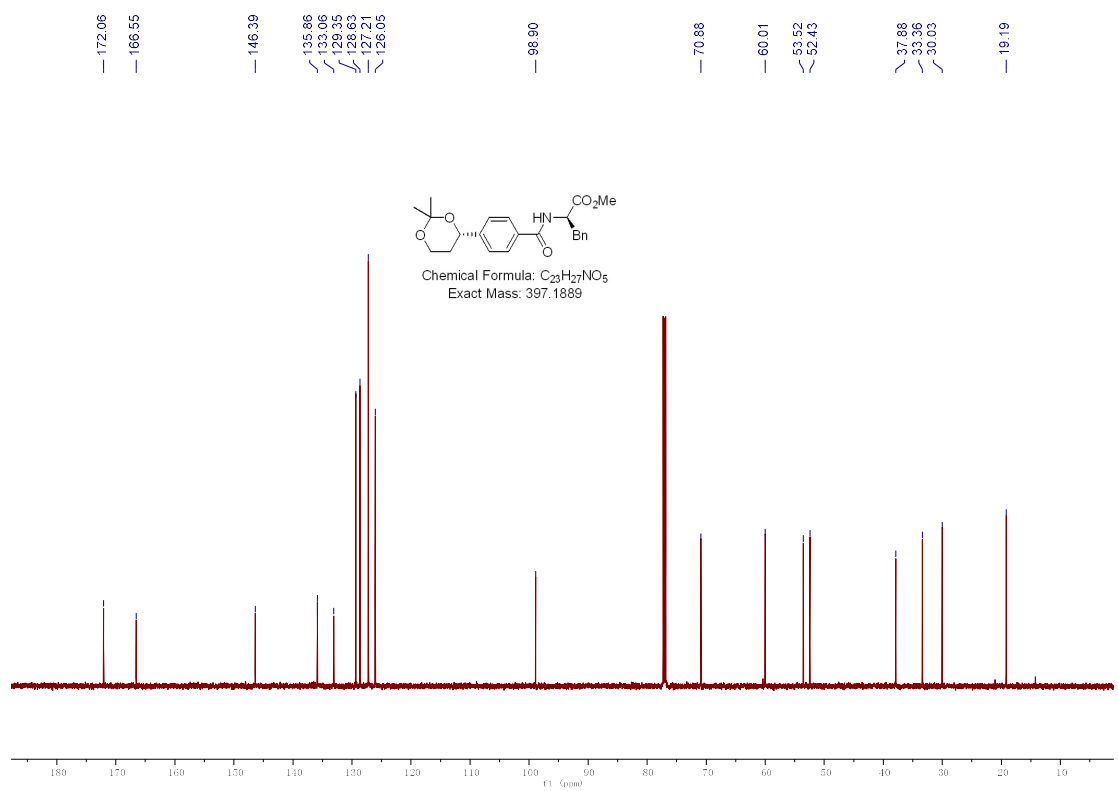

**$^{13}\text{C}$  NMR (151 MHz,  $\text{CDCl}_3$ ) Spectrum of 5ax**

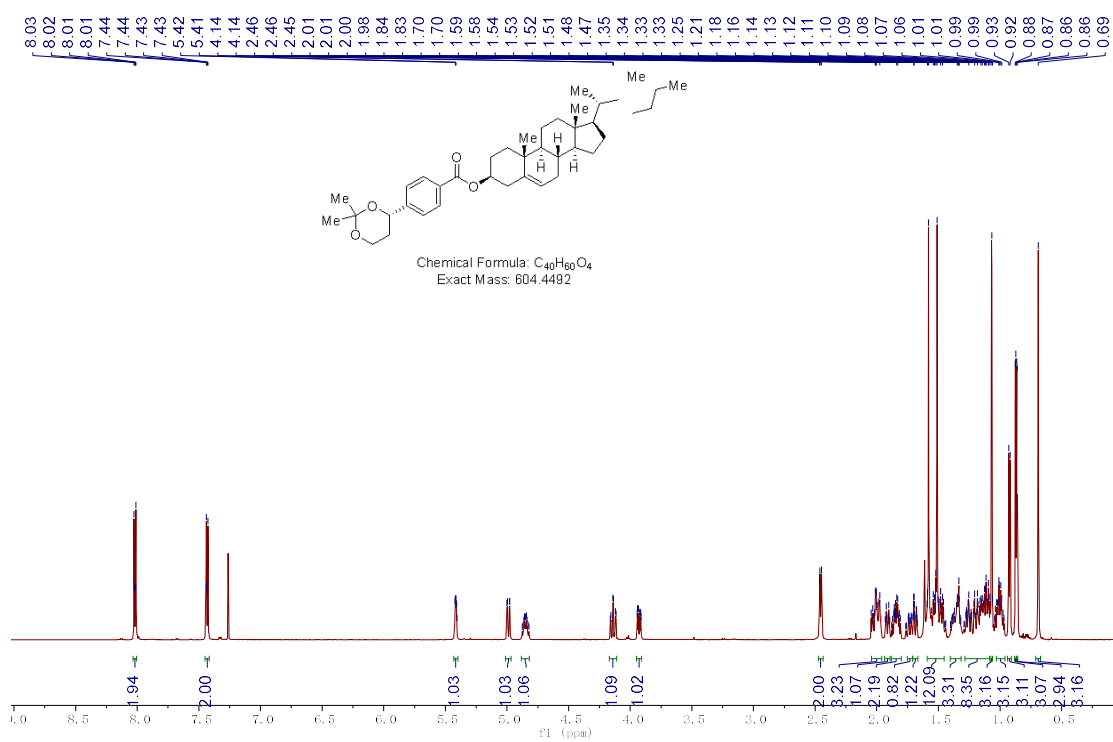

**<sup>1</sup>H NMR (600 MHz, CDCl<sub>3</sub>) Spectrum of 5az**

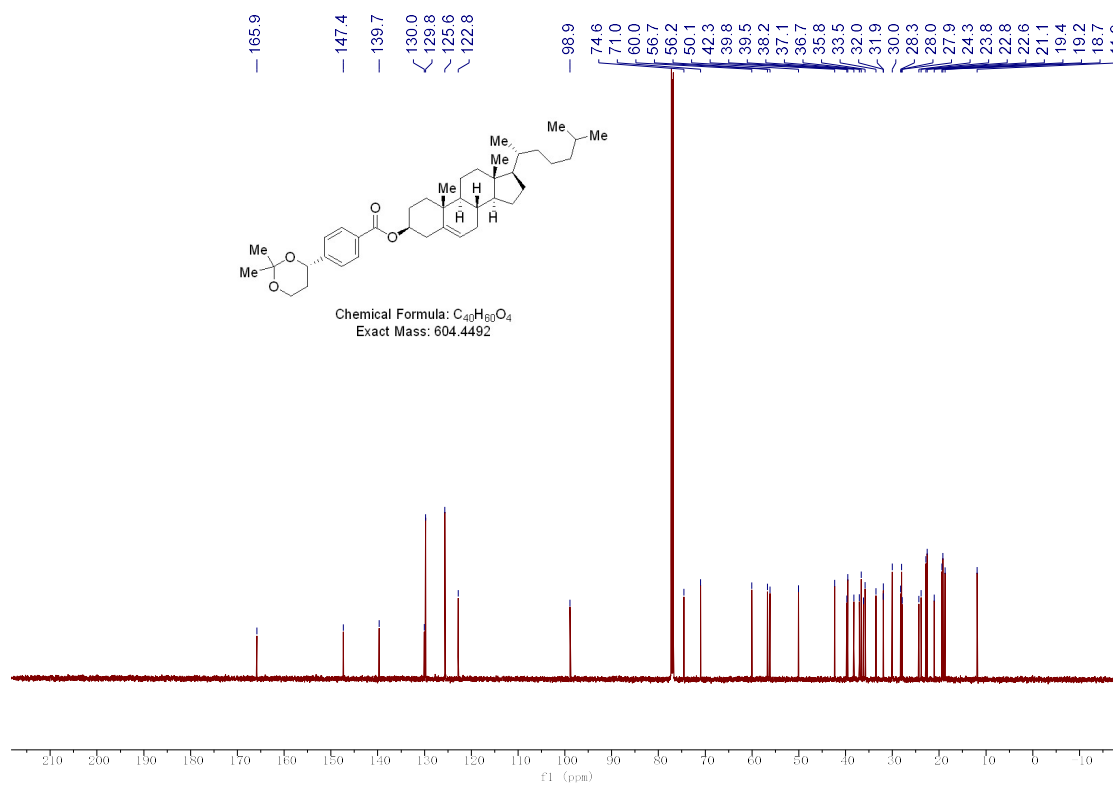

**<sup>13</sup>C NMR (151 MHz, CDCl<sub>3</sub>) Spectrum of 5az**

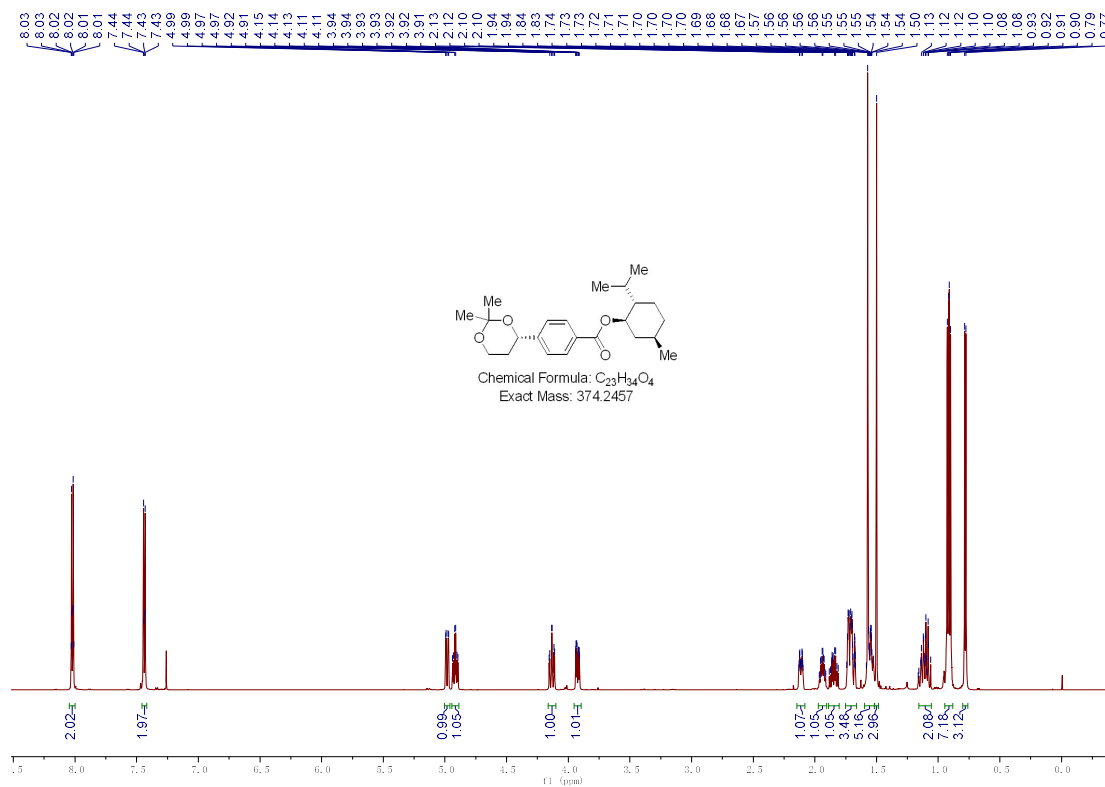

<sup>1</sup>H NMR (600 MHz, CDCl<sub>3</sub>) Spectrum of 5aaa

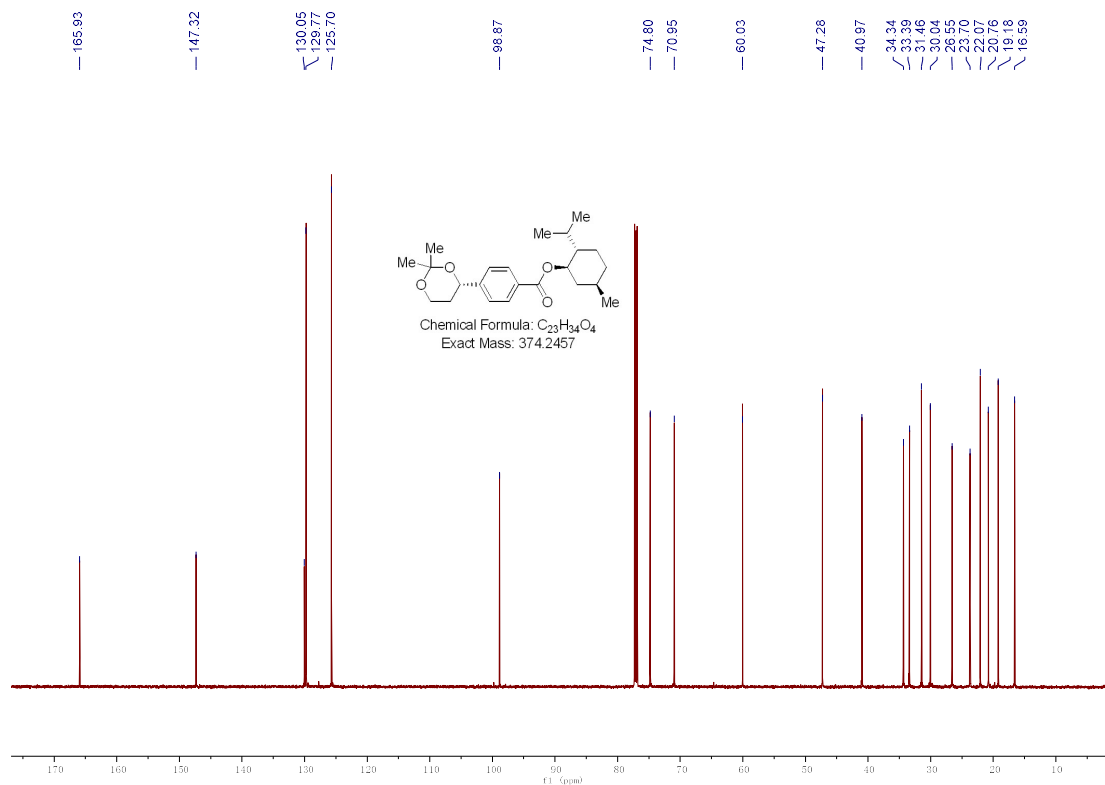

<sup>13</sup>C NMR (151 MHz, CDCl<sub>3</sub>) Spectrum of 5aaa

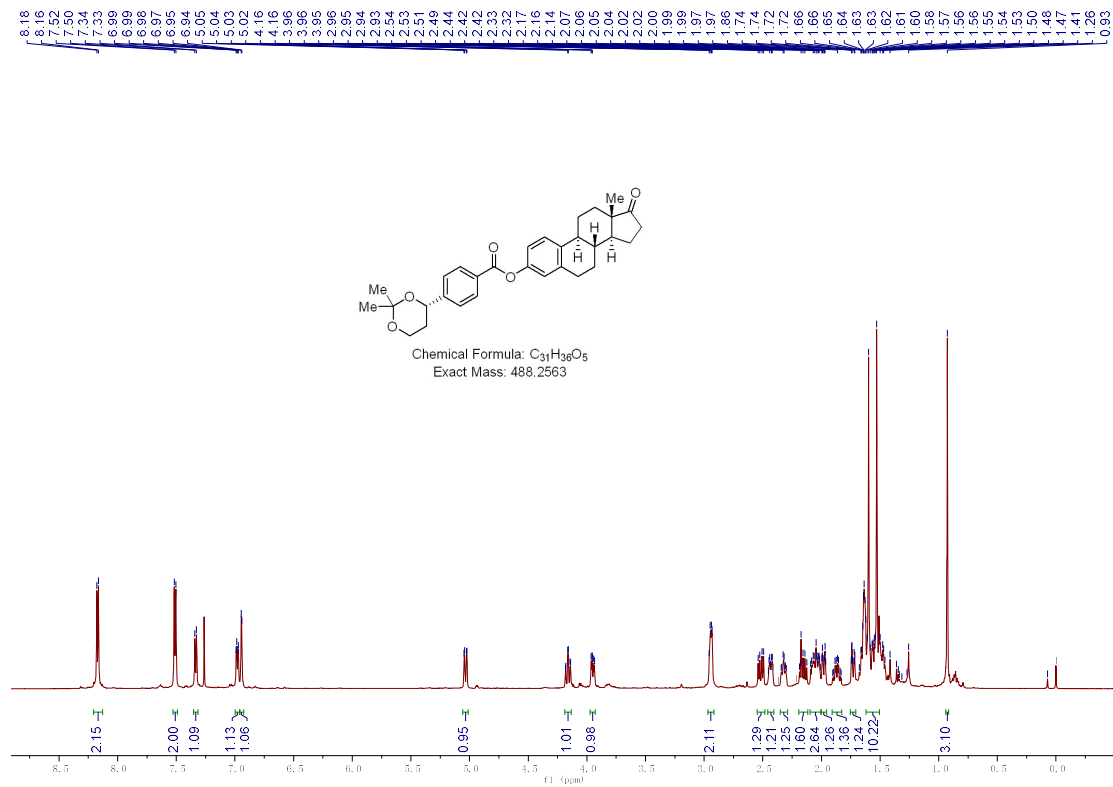

<sup>1</sup>H NMR (600 MHz, CDCl<sub>3</sub>) Spectrum of 5aab

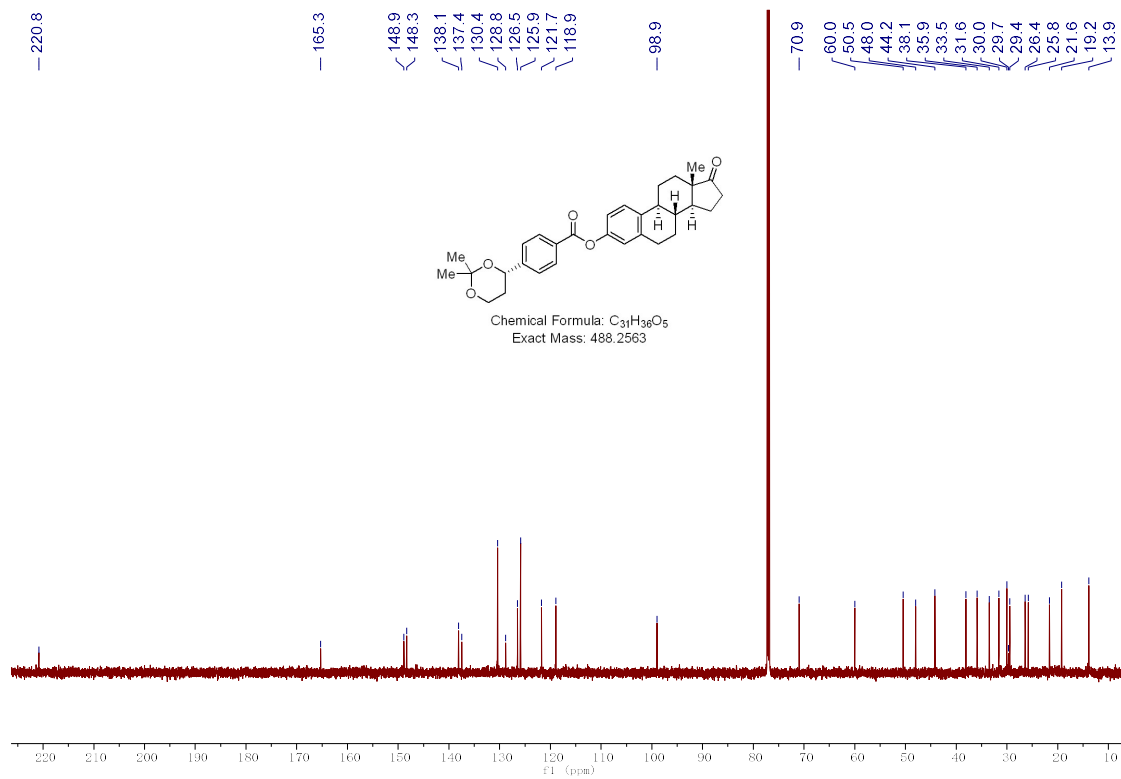

<sup>13</sup>C NMR (151 MHz, CDCl<sub>3</sub>) Spectrum of 5aab

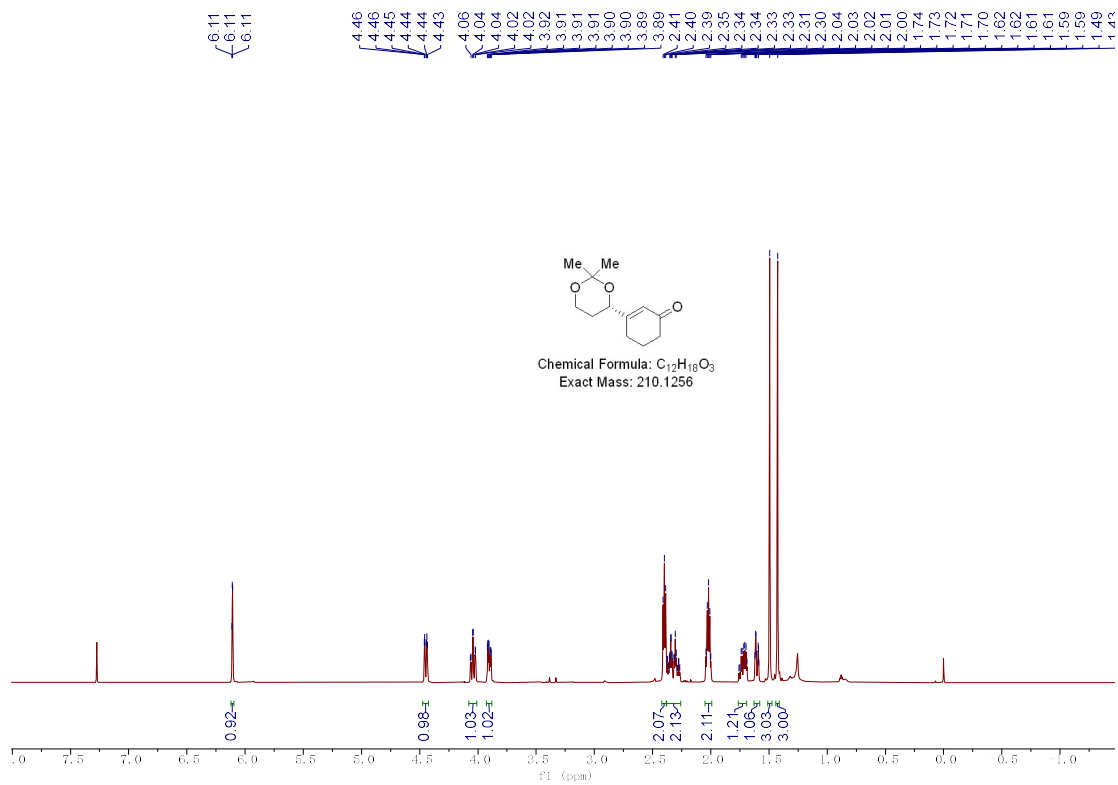

**<sup>1</sup>H NMR (600 MHz, CDCl<sub>3</sub>) Spectrum of 5aac**

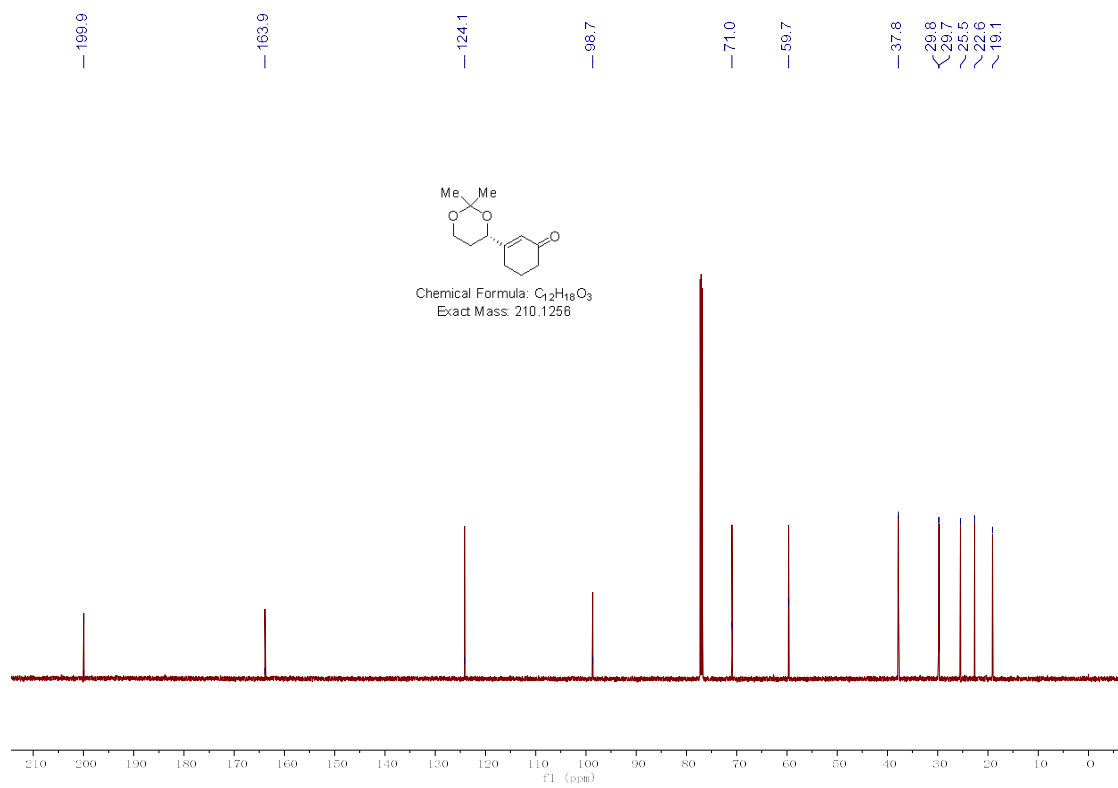

**<sup>13</sup>C NMR (151 MHz, CDCl<sub>3</sub>) Spectrum of 5aac**

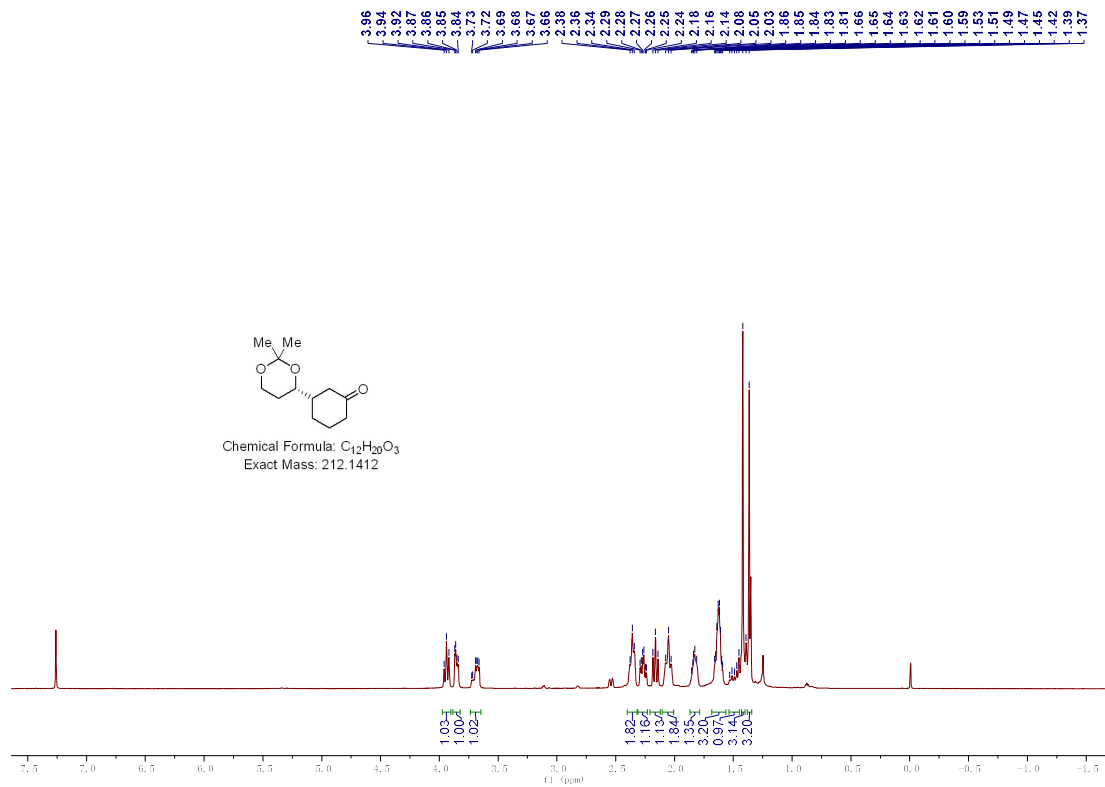

**<sup>1</sup>H NMR (600 MHz, CDCl<sub>3</sub>) Spectrum of 5aad**

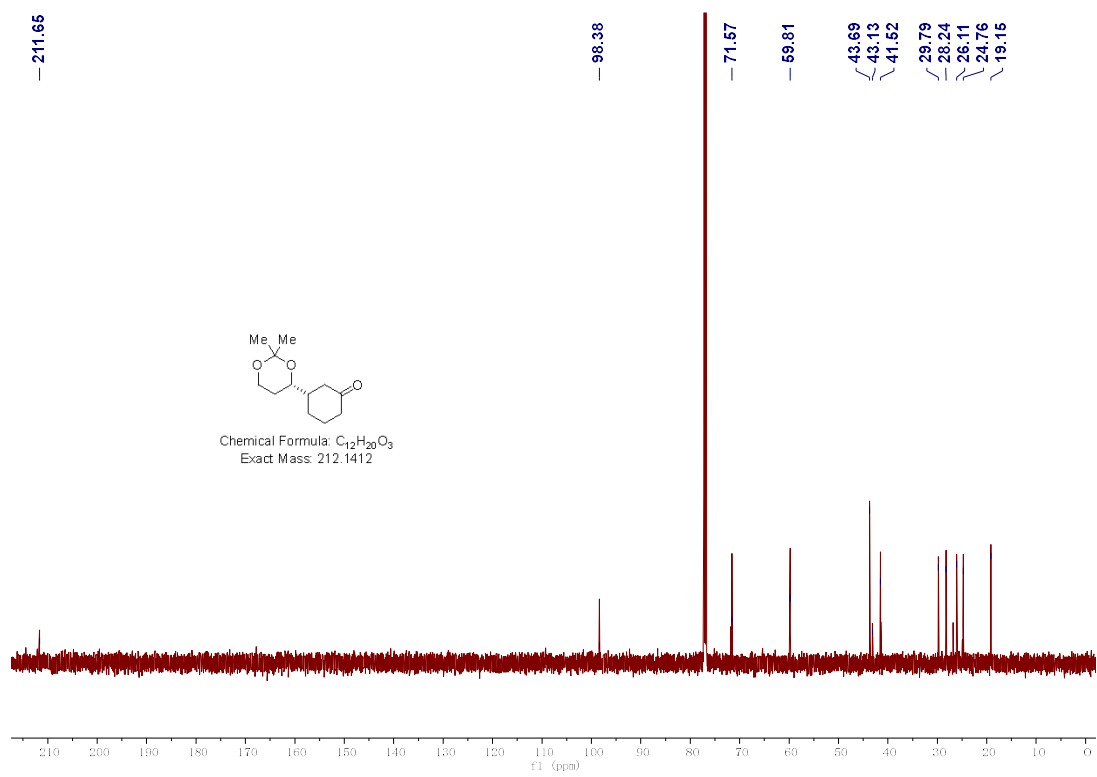

**<sup>13</sup>C NMR (151 MHz, CDCl<sub>3</sub>) Spectrum of 5aad**

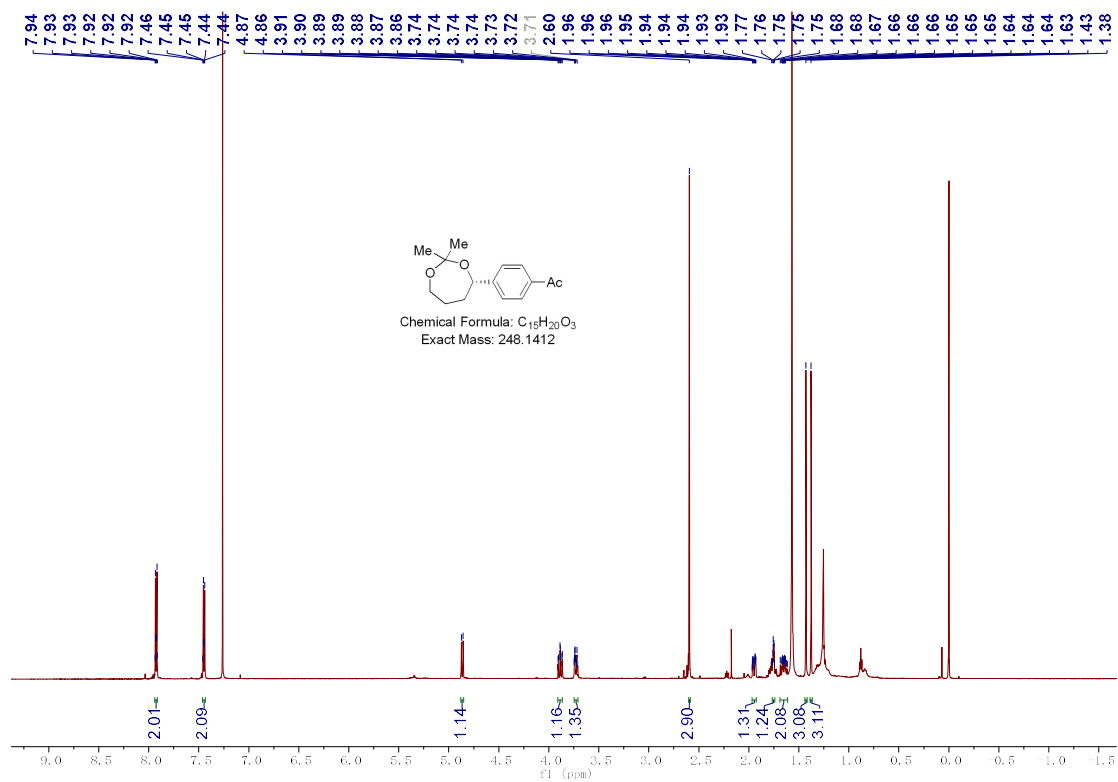

**$^1H$  NMR (600 MHz,  $CDCl_3$ ) Spectrum of 7aa**

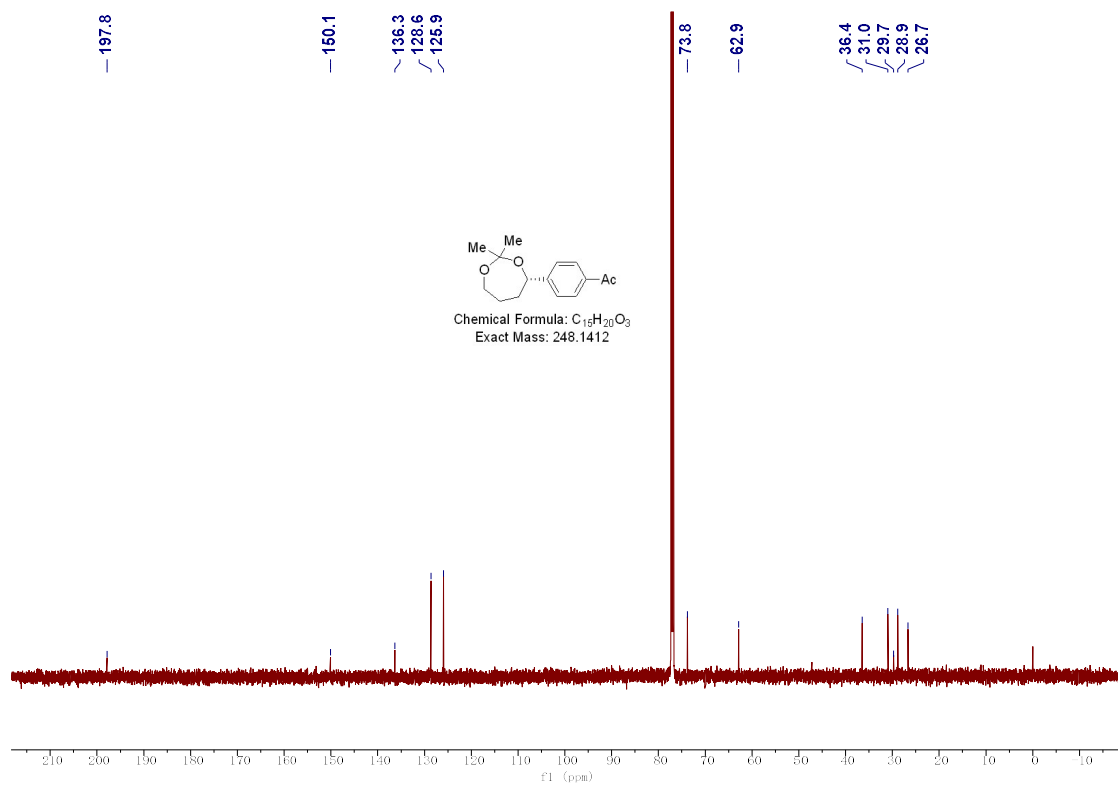

**$^{13}C$  NMR (151 MHz,  $CDCl_3$ ) Spectrum of 7aa**



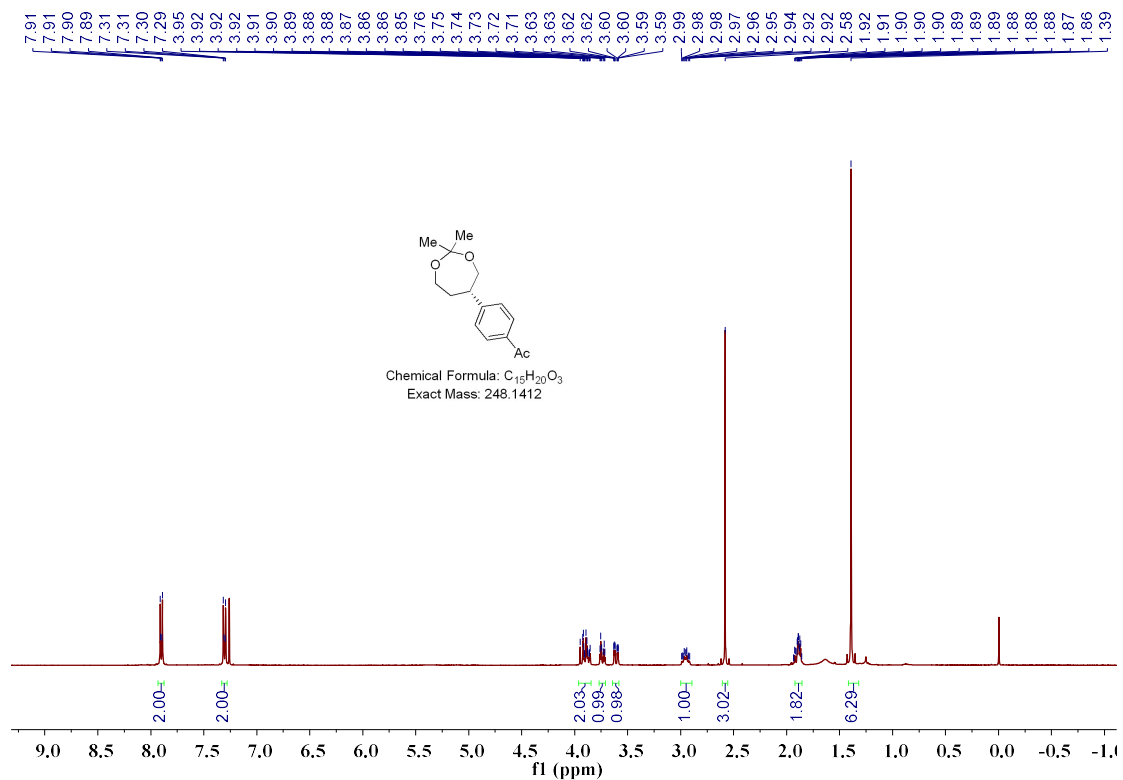

**$^1H$  NMR (400 MHz,  $CDCl_3$ ) Spectrum of 7aa'**

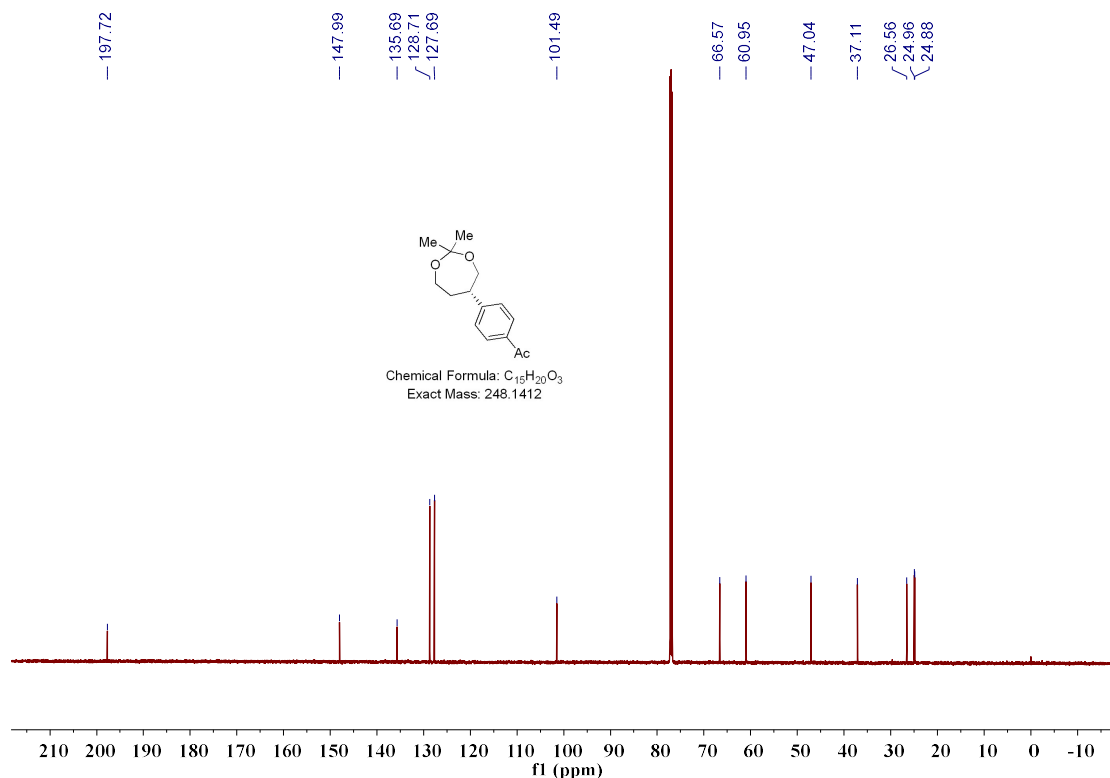

**$^{13}C$  NMR (151 MHz,  $CDCl_3$ ) Spectrum of 7aa'**

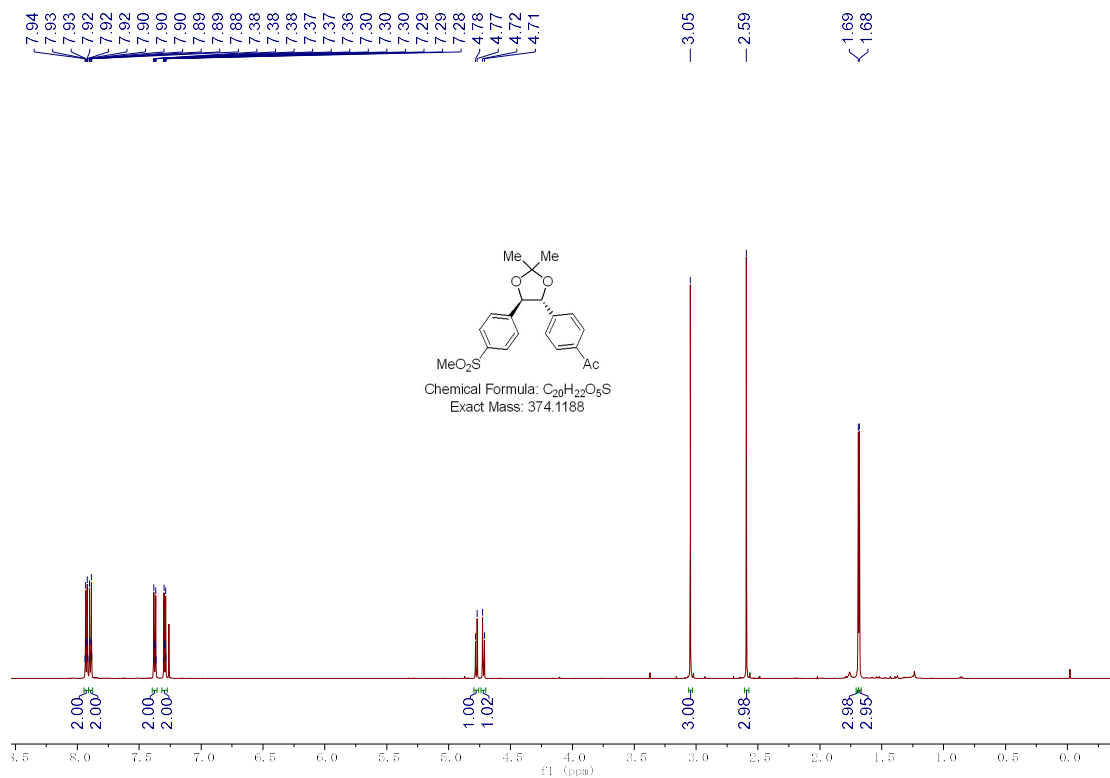

**<sup>1</sup>H NMR (600 MHz, CDCl<sub>3</sub>) Spectrum of 9a**

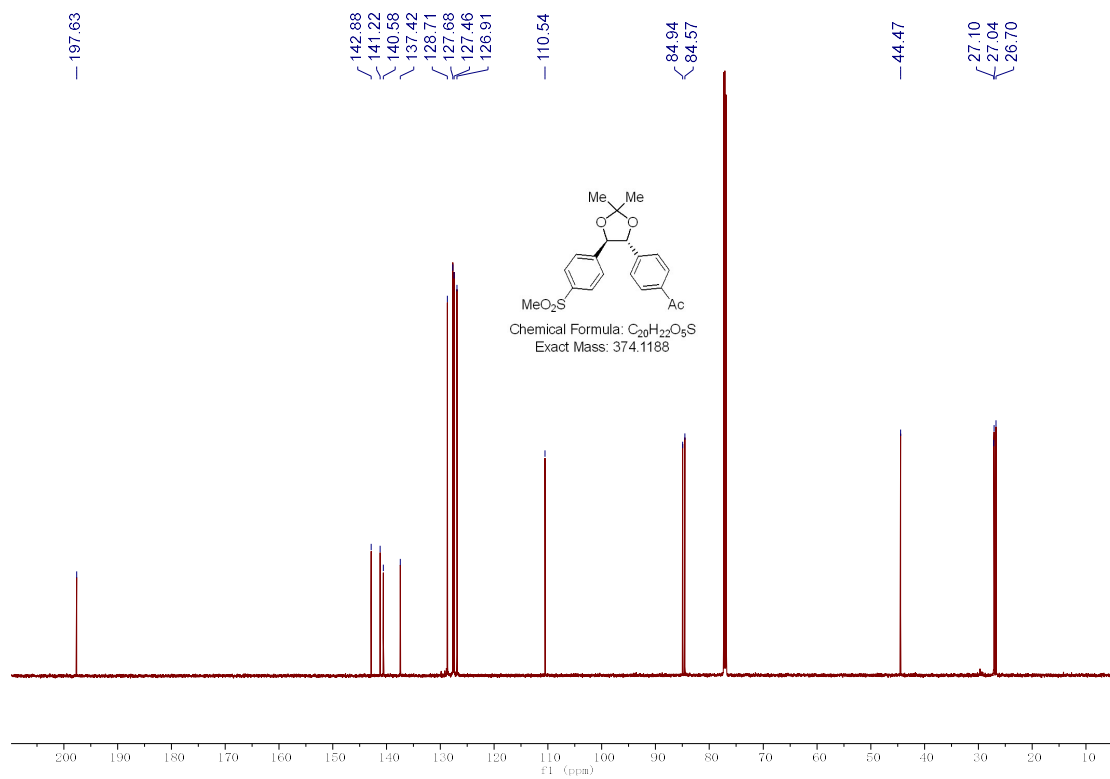

**<sup>13</sup>C NMR (151 MHz, CDCl<sub>3</sub>) Spectrum of 9a**

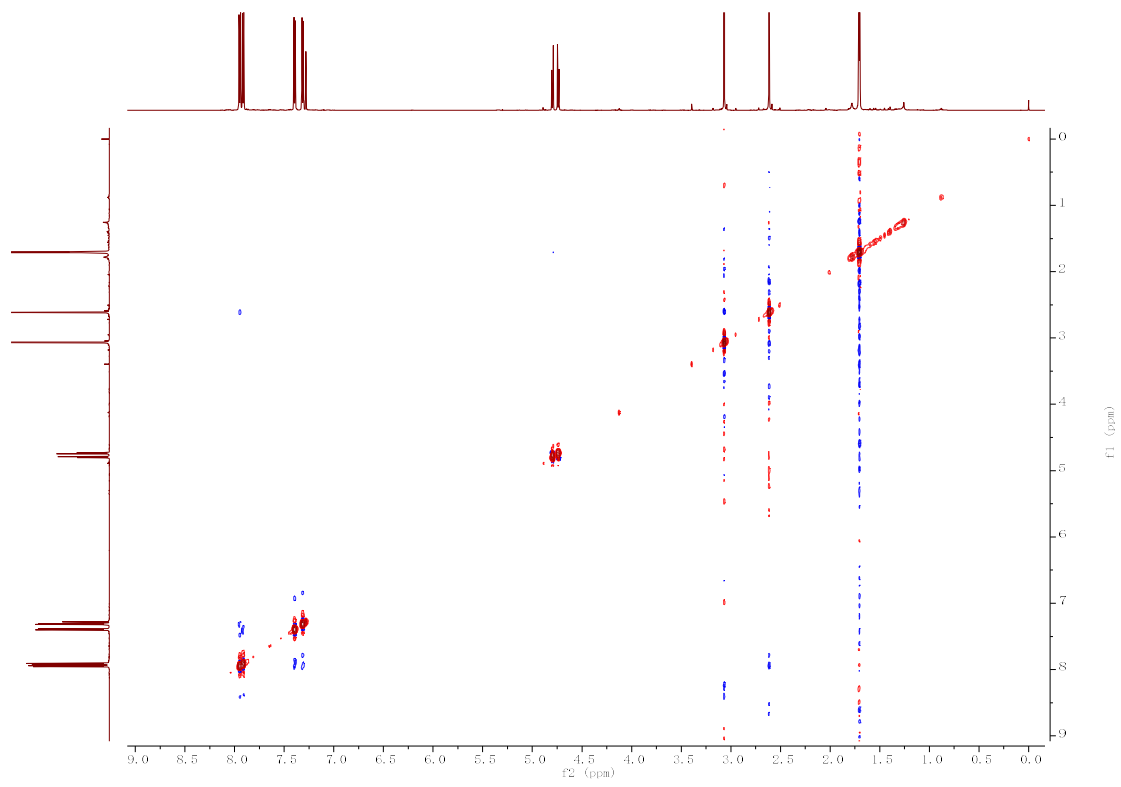

**NOE Spectrum of 9a**

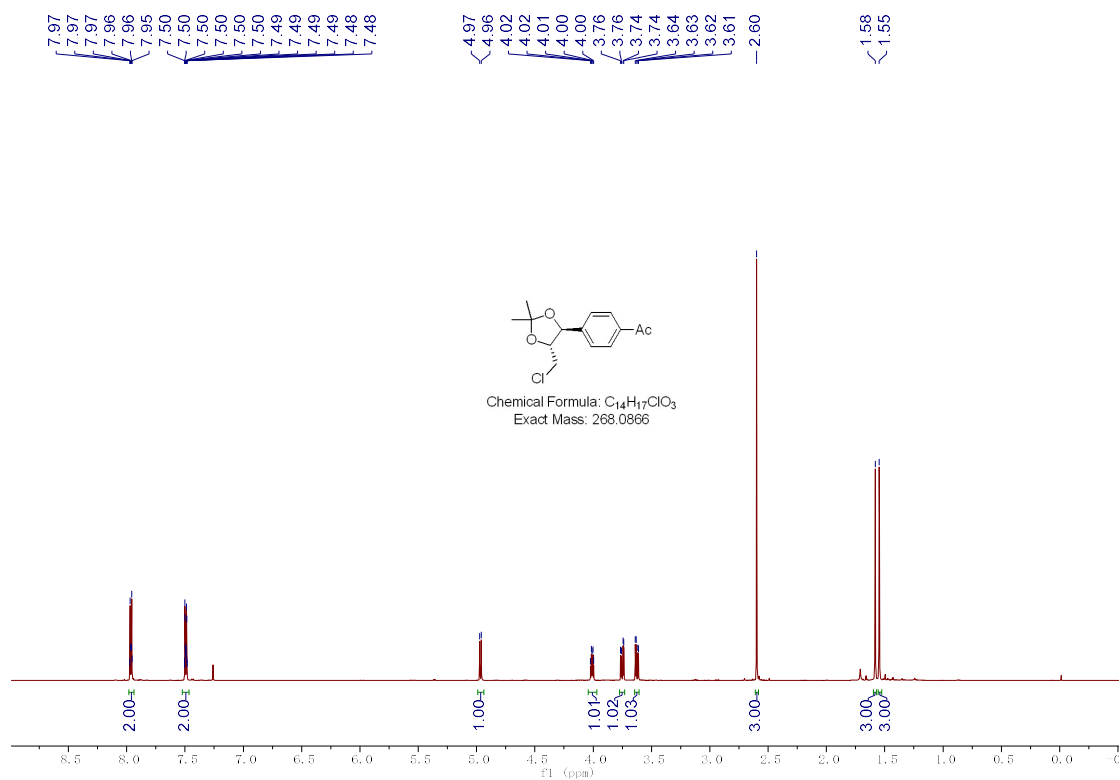

**<sup>1</sup>H NMR (600 MHz, CDCl<sub>3</sub>) Spectrum of 9b**

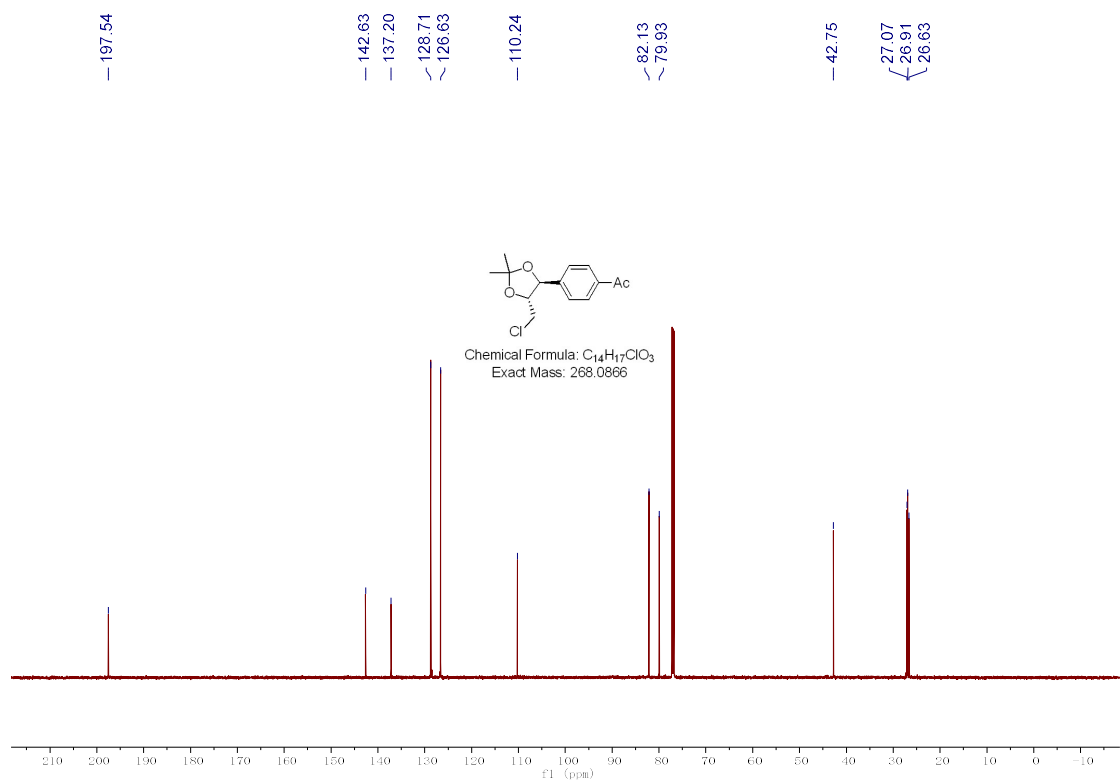

**<sup>13</sup>C NMR (151 MHz, CDCl<sub>3</sub>) Spectrum of 9b**

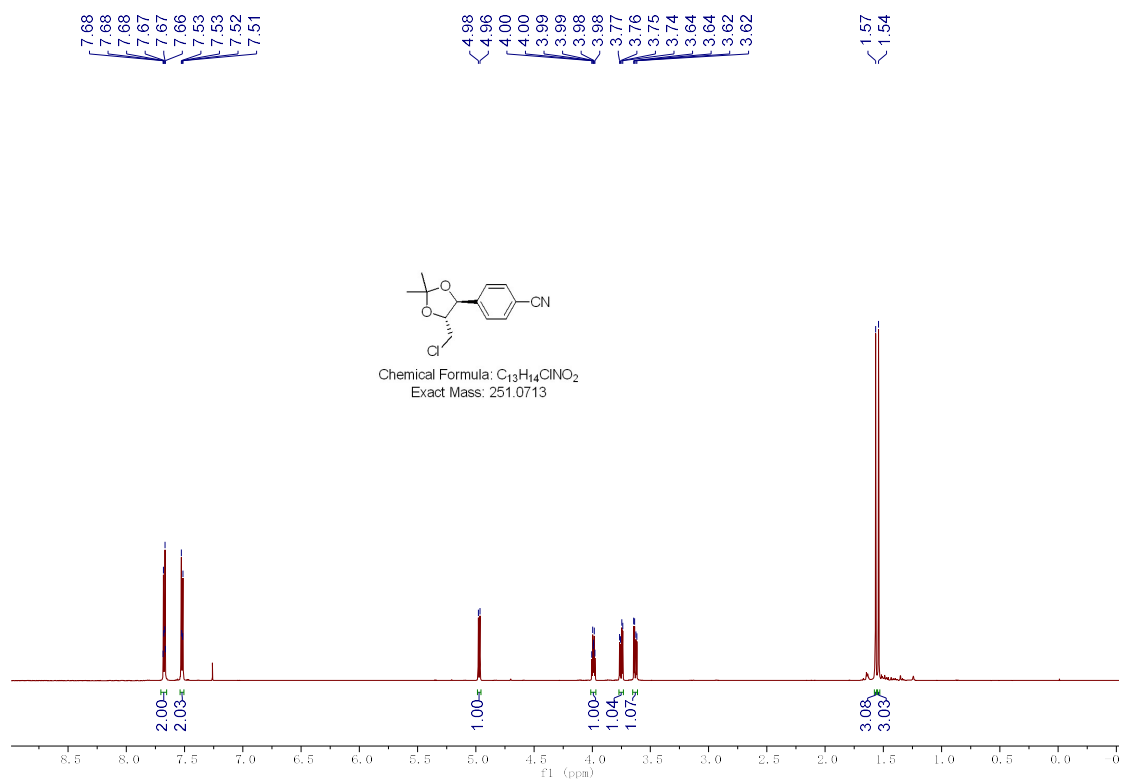

**<sup>1</sup>H NMR (600 MHz, CDCl<sub>3</sub>) Spectrum of 9c**

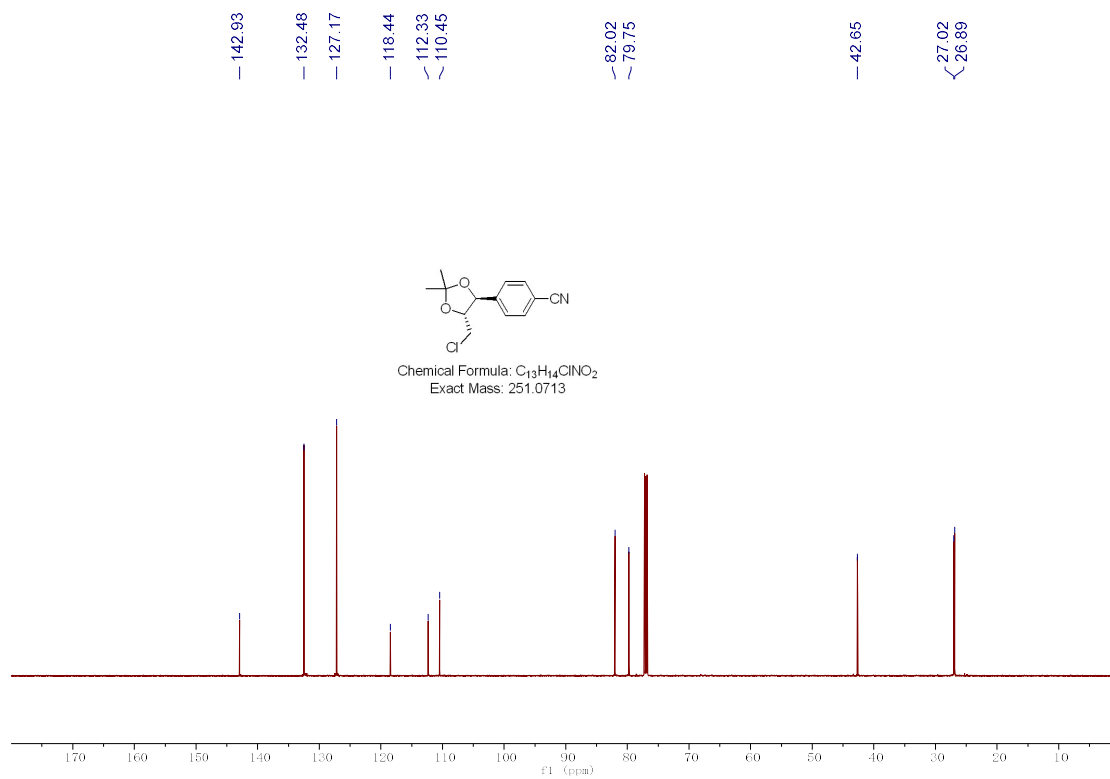

**<sup>13</sup>C NMR (151 MHz, CDCl<sub>3</sub>) Spectrum of 9c**

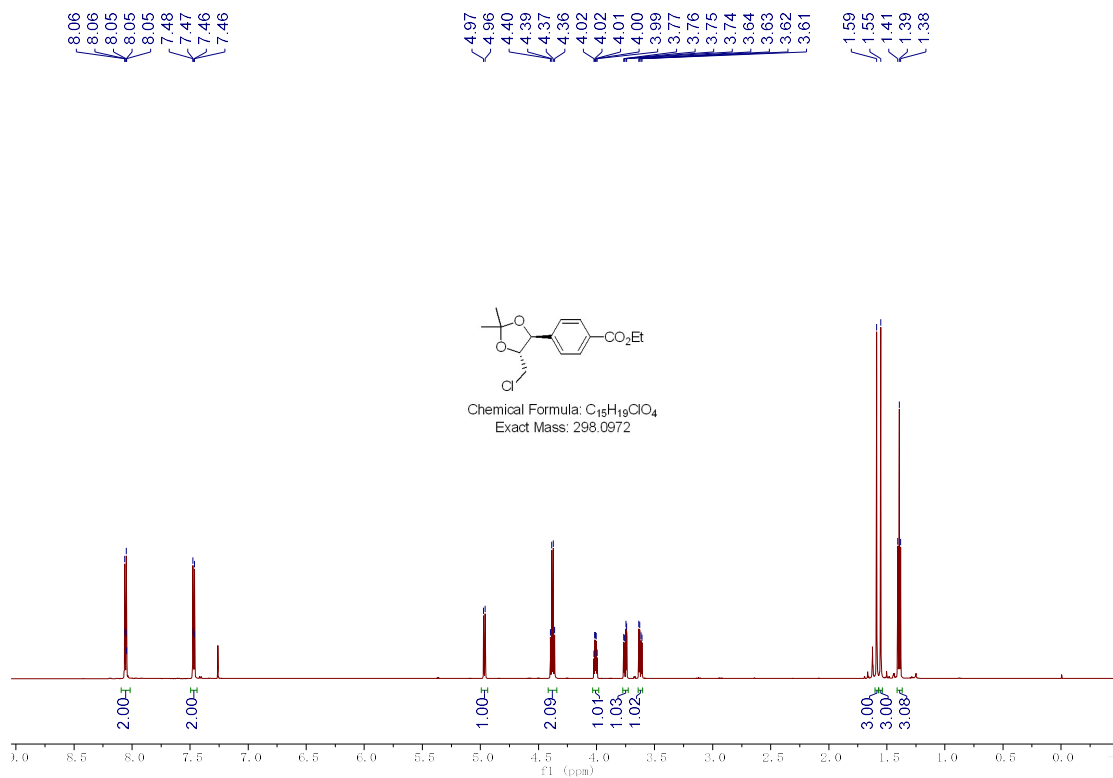

**<sup>1</sup>H NMR (600 MHz, CDCl<sub>3</sub>) Spectrum of 9d**

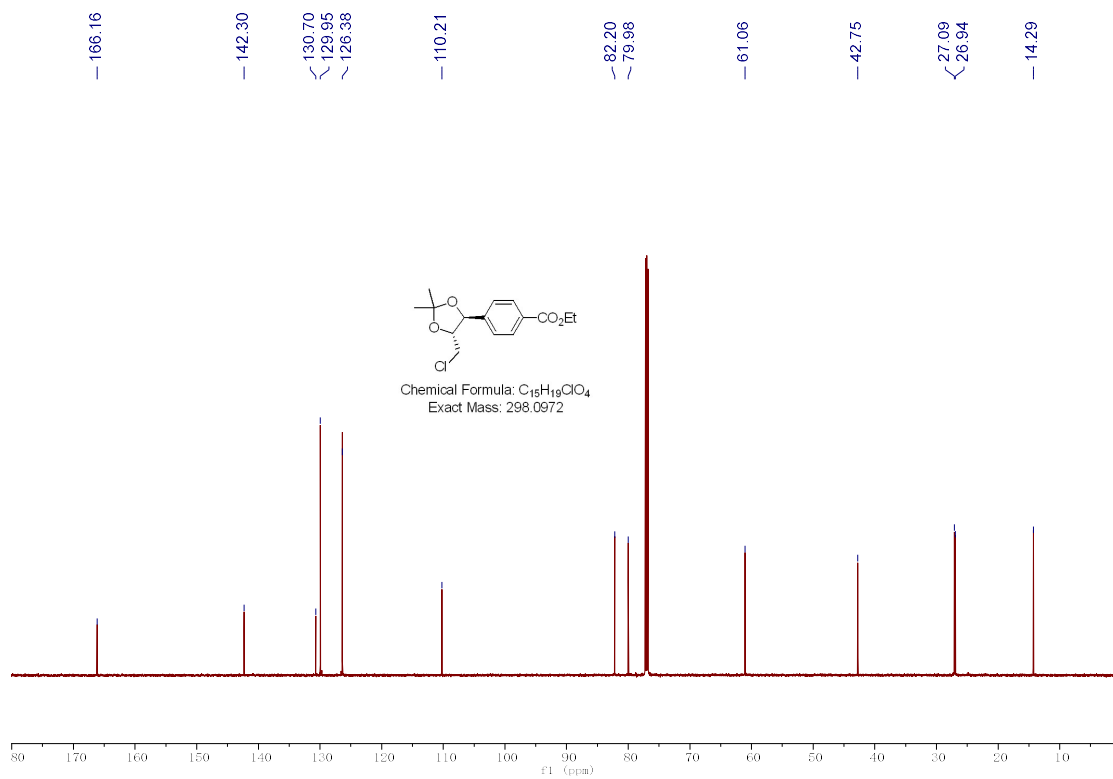

**<sup>13</sup>C NMR (151 MHz, CDCl<sub>3</sub>) Spectrum of 9d**

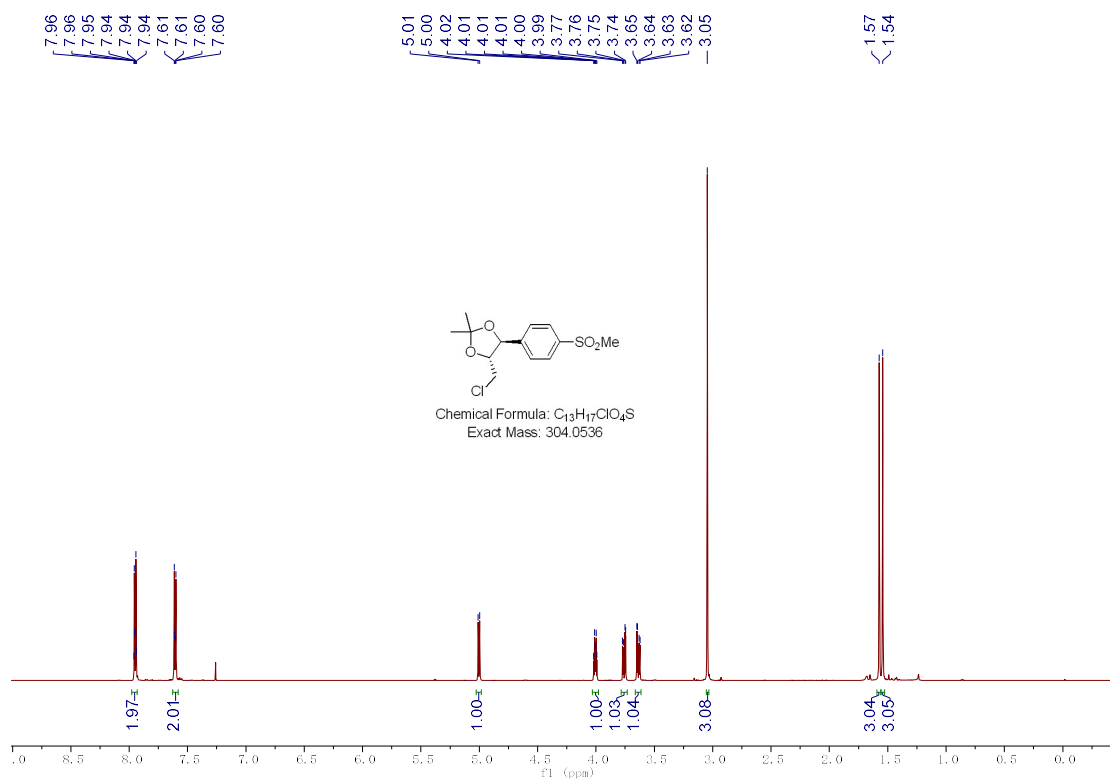

**<sup>1</sup>H NMR (600 MHz, CDCl<sub>3</sub>) Spectrum of 9e**

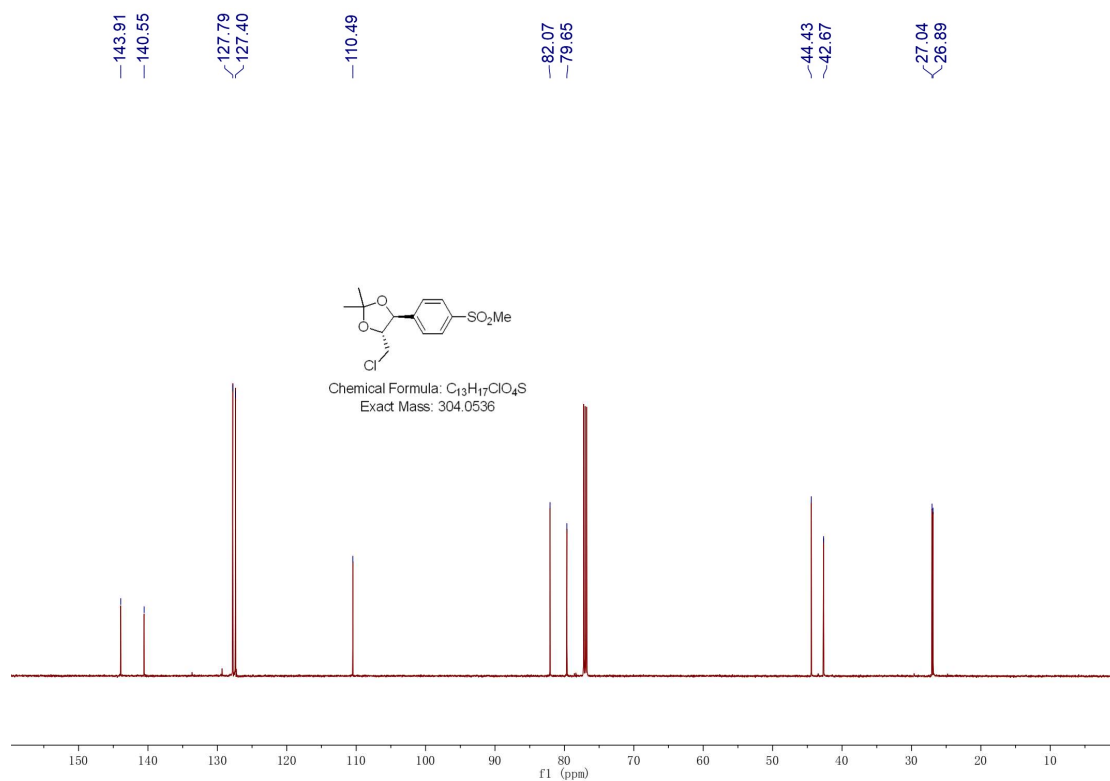

**<sup>13</sup>C NMR (151 MHz, CDCl<sub>3</sub>) Spectrum of 9e**

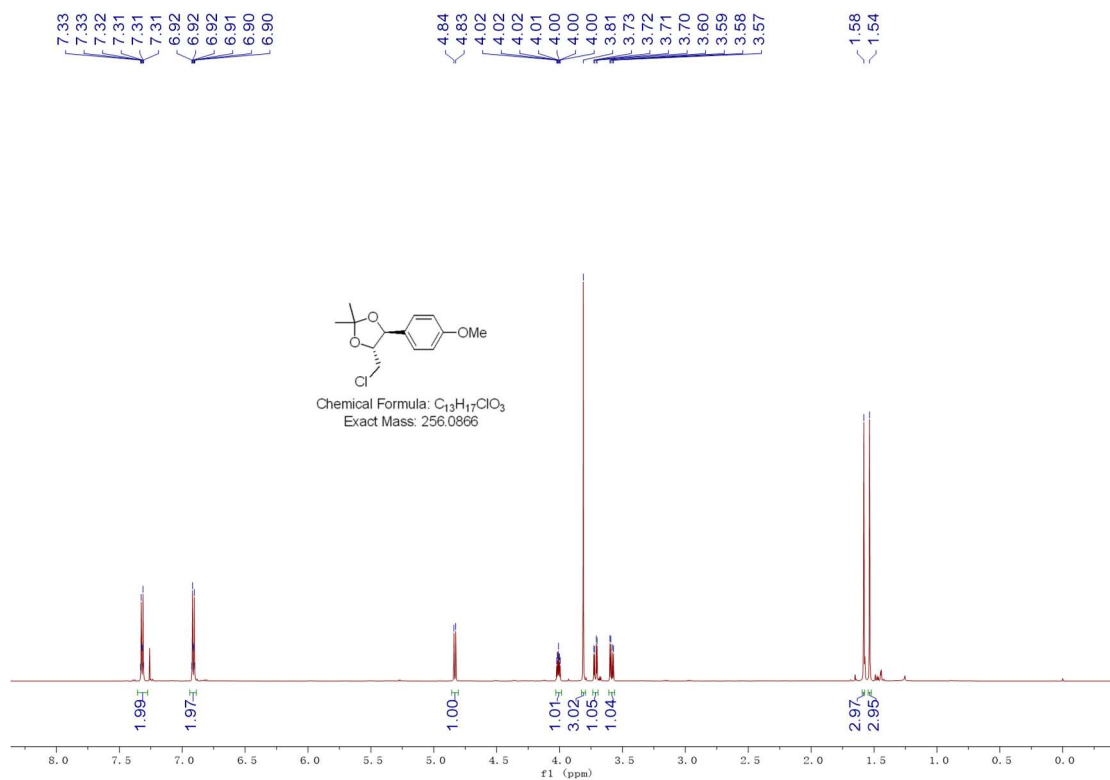

**<sup>1</sup>H NMR (600 MHz, CDCl<sub>3</sub>) Spectrum of 9f**

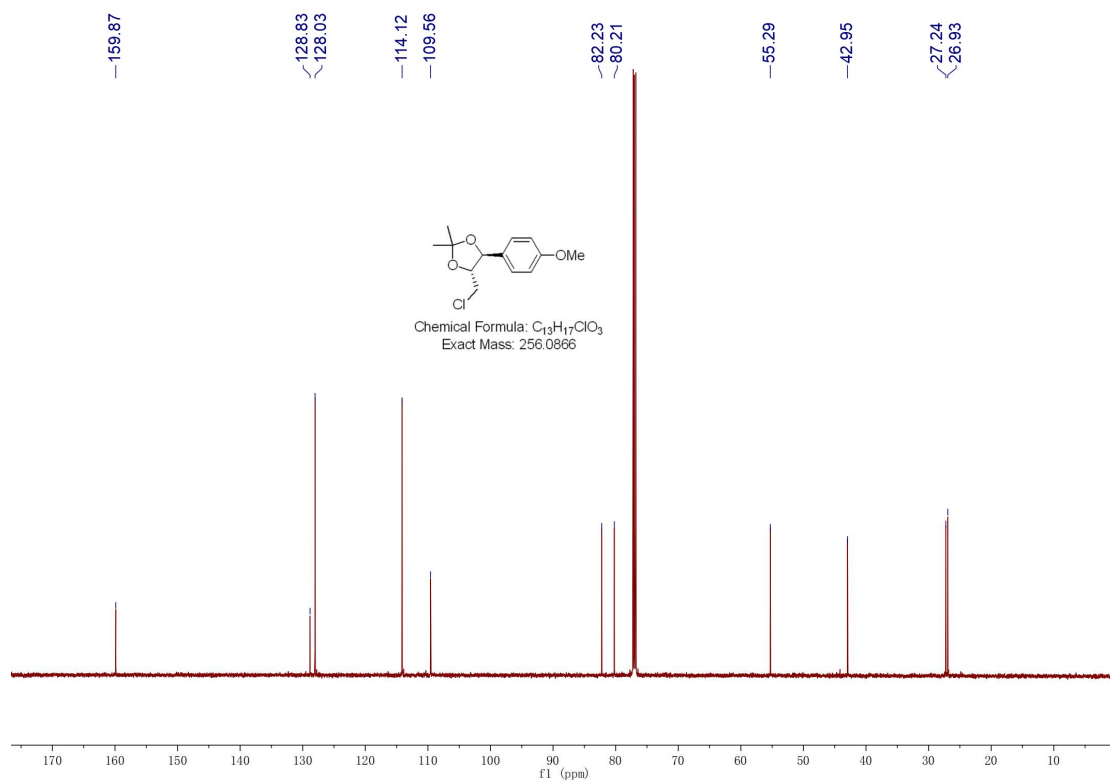

**<sup>13</sup>C NMR (151 MHz, CDCl<sub>3</sub>) Spectrum of 9f**



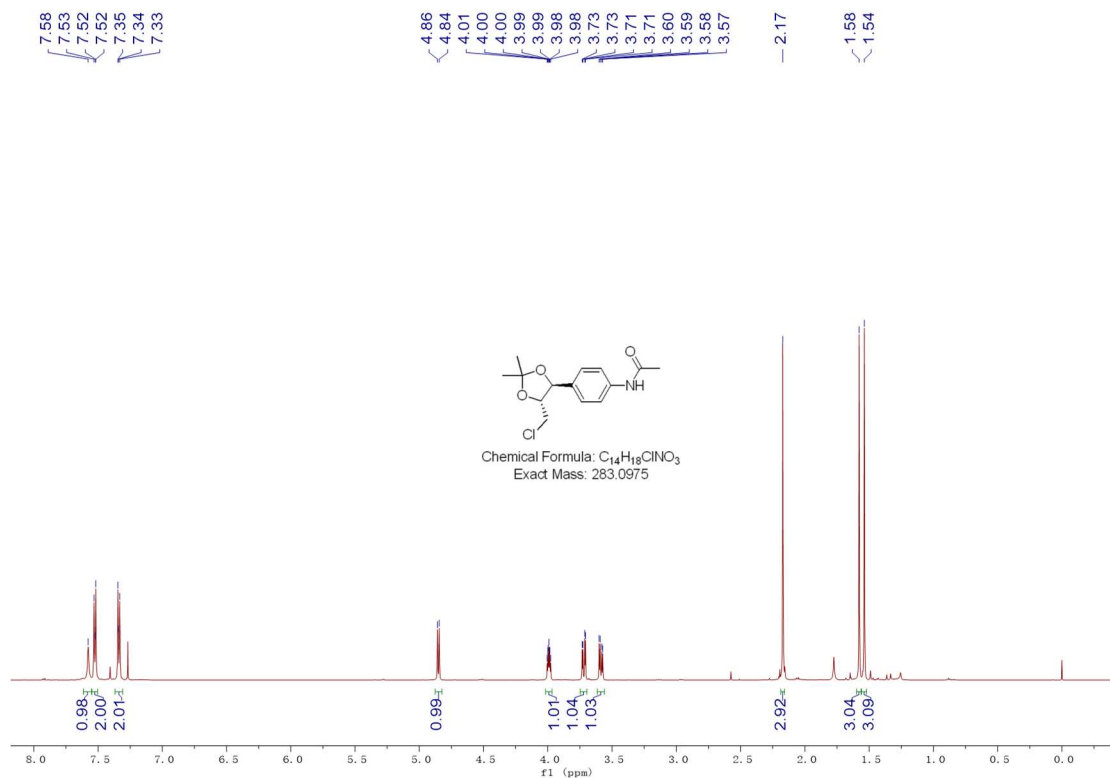

**$^1H$  NMR (600 MHz,  $CDCl_3$ ) Spectrum of 9g**

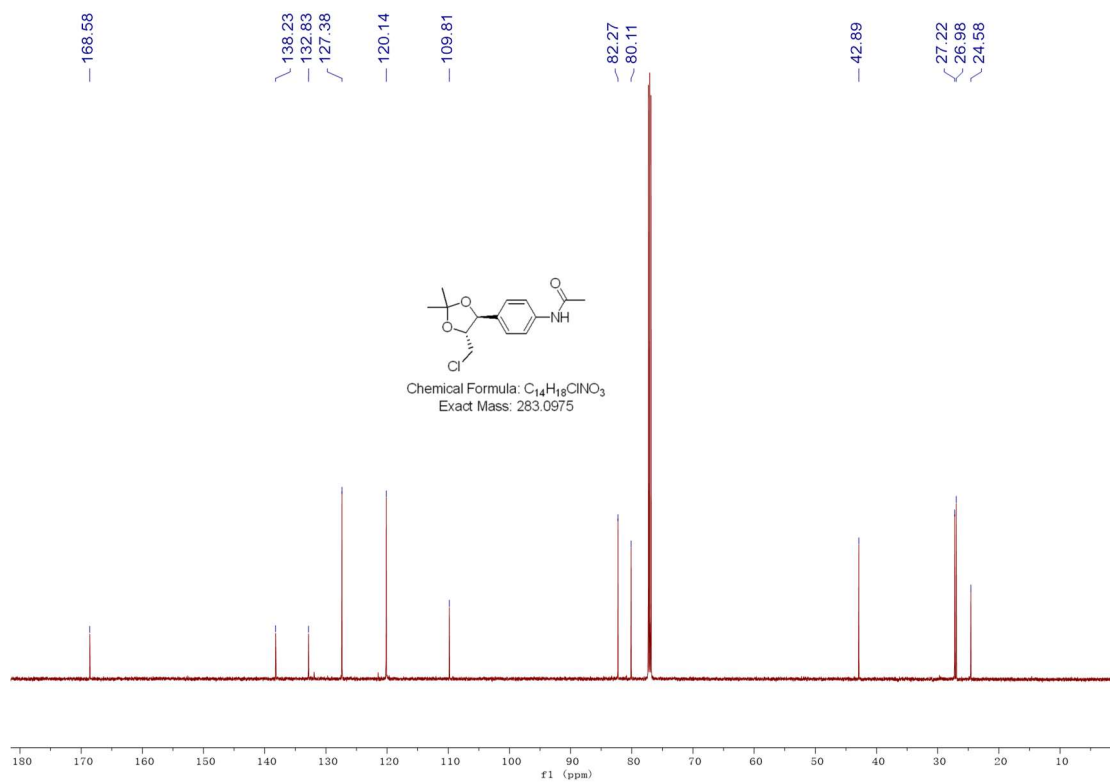

**$^{13}C$  NMR (151 MHz,  $CDCl_3$ ) Spectrum of 9g**

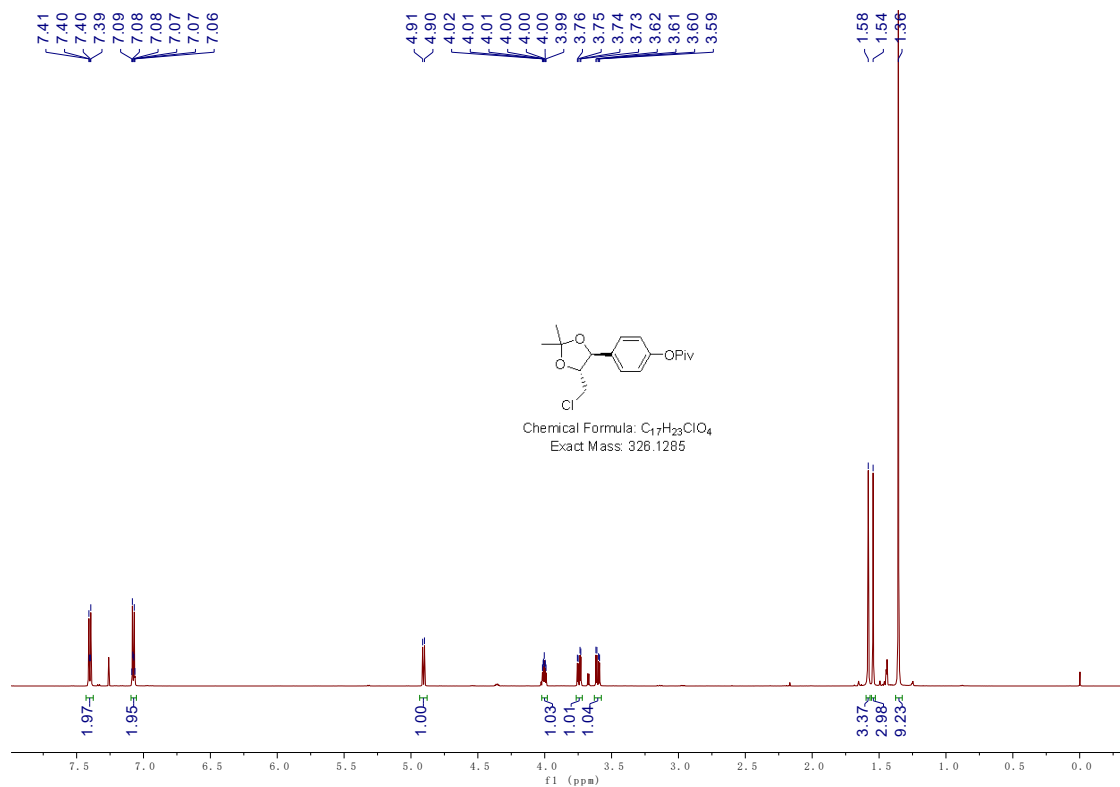

**$^1H$  NMR (600 MHz,  $CDCl_3$ ) Spectrum of 9h**

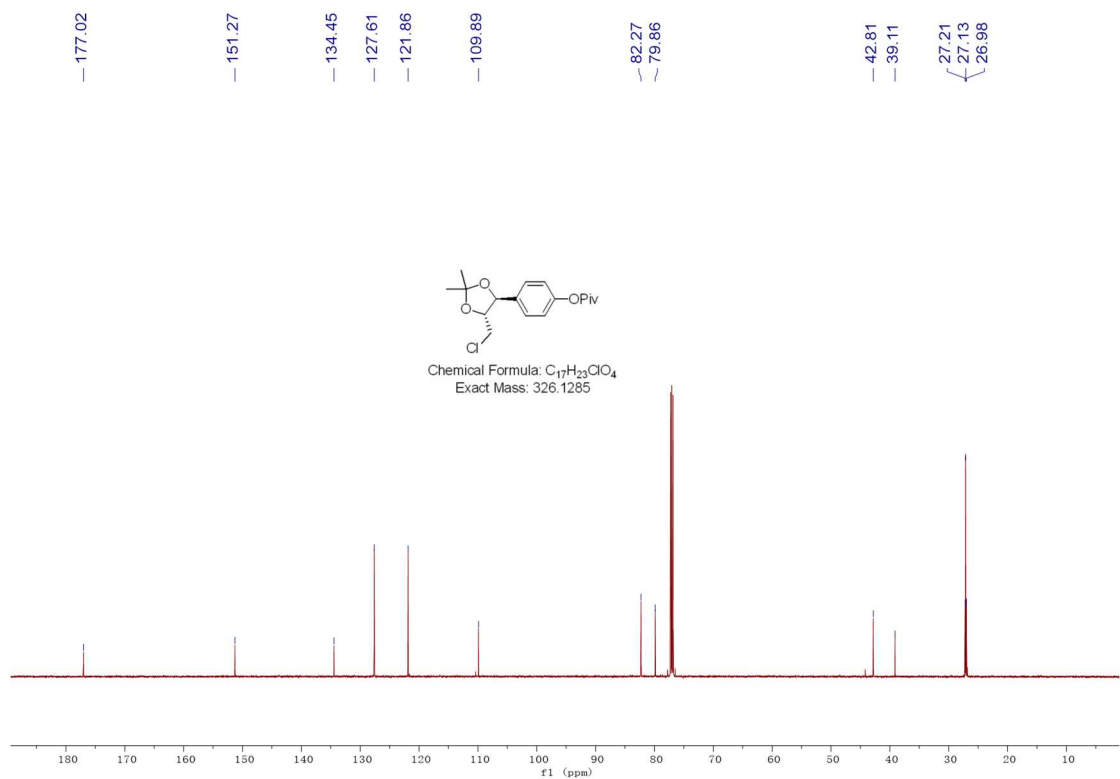

**$^{13}C$  NMR (151 MHz,  $CDCl_3$ ) Spectrum of 9h**

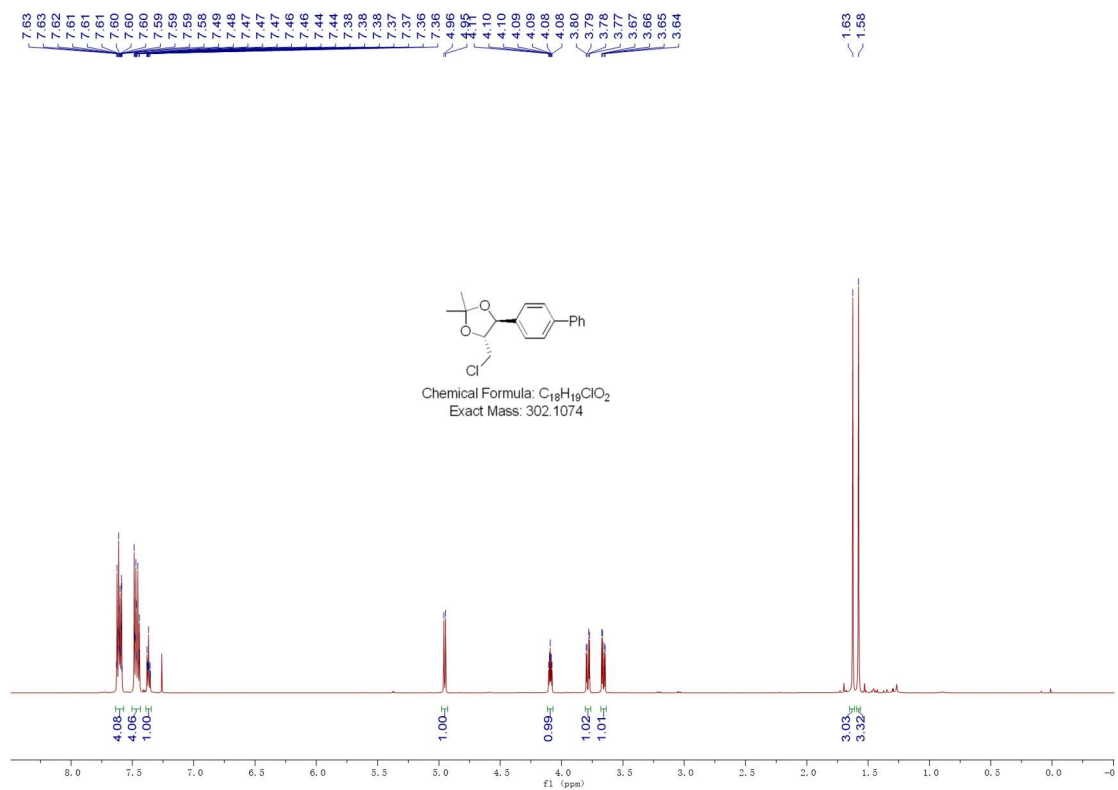

**<sup>1</sup>H NMR (600 MHz, CDCl<sub>3</sub>) Spectrum of 9i**

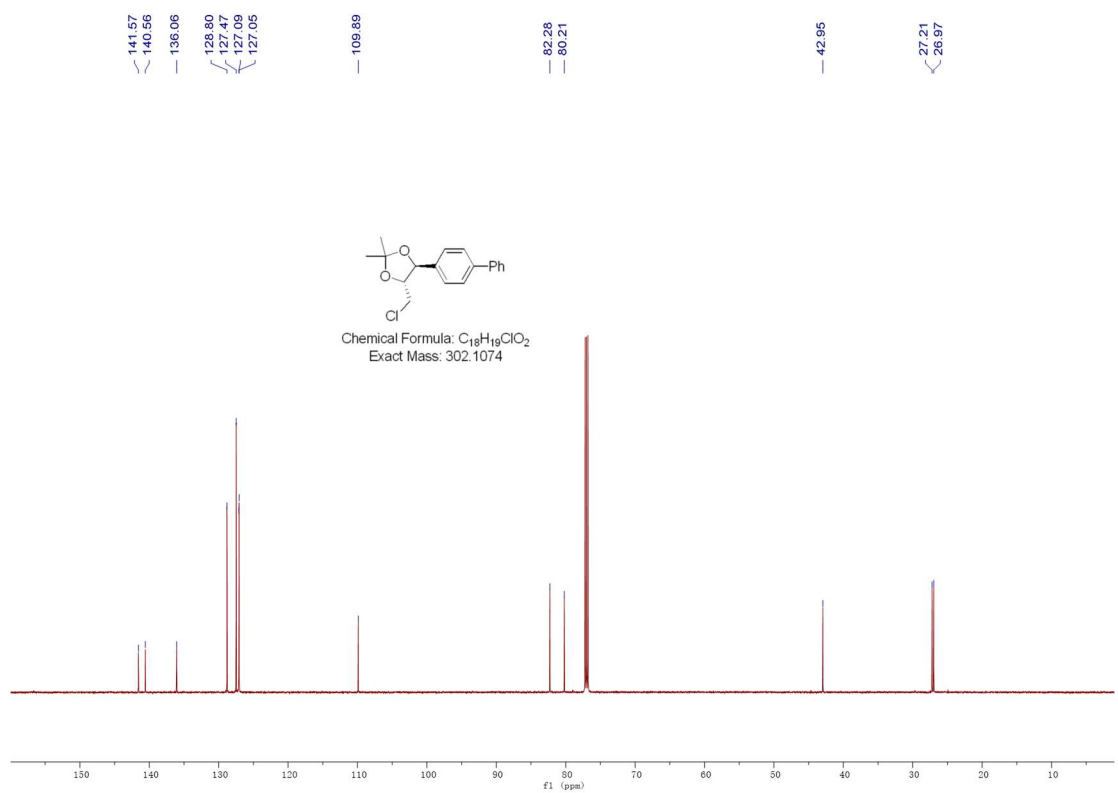

**<sup>13</sup>C NMR (151 MHz, CDCl<sub>3</sub>) Spectrum of 9i**

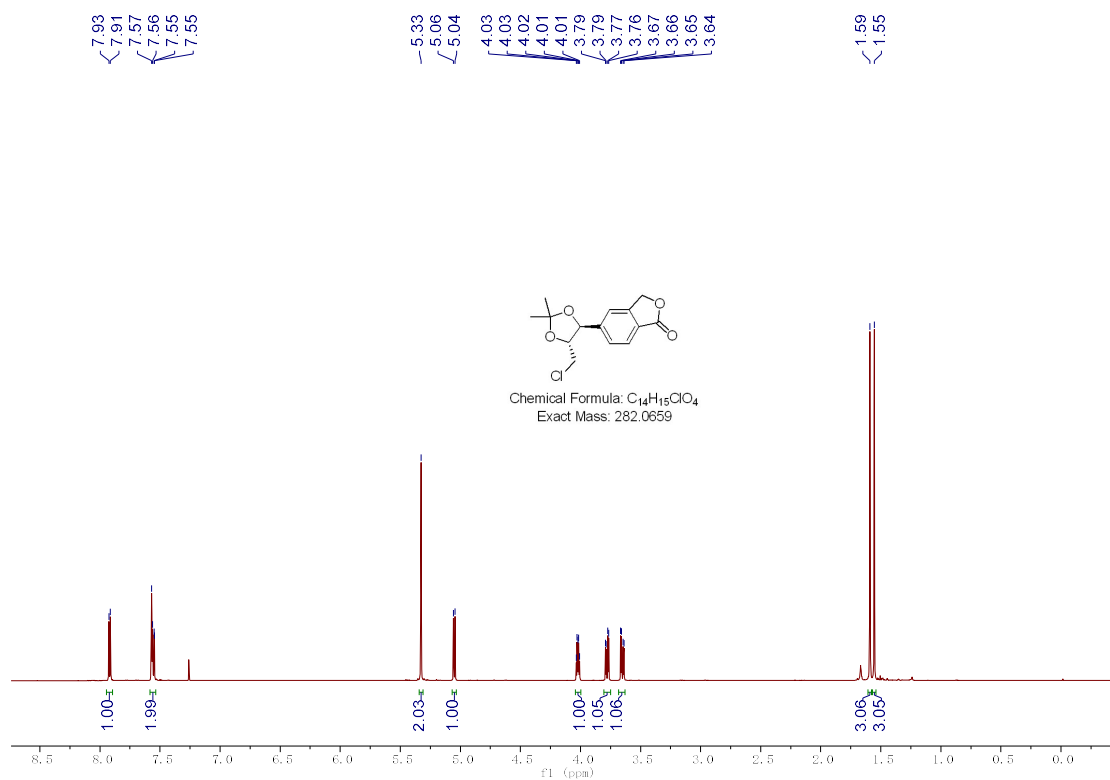

**<sup>1</sup>H NMR (600 MHz, CDCl<sub>3</sub>) Spectrum of 9j**

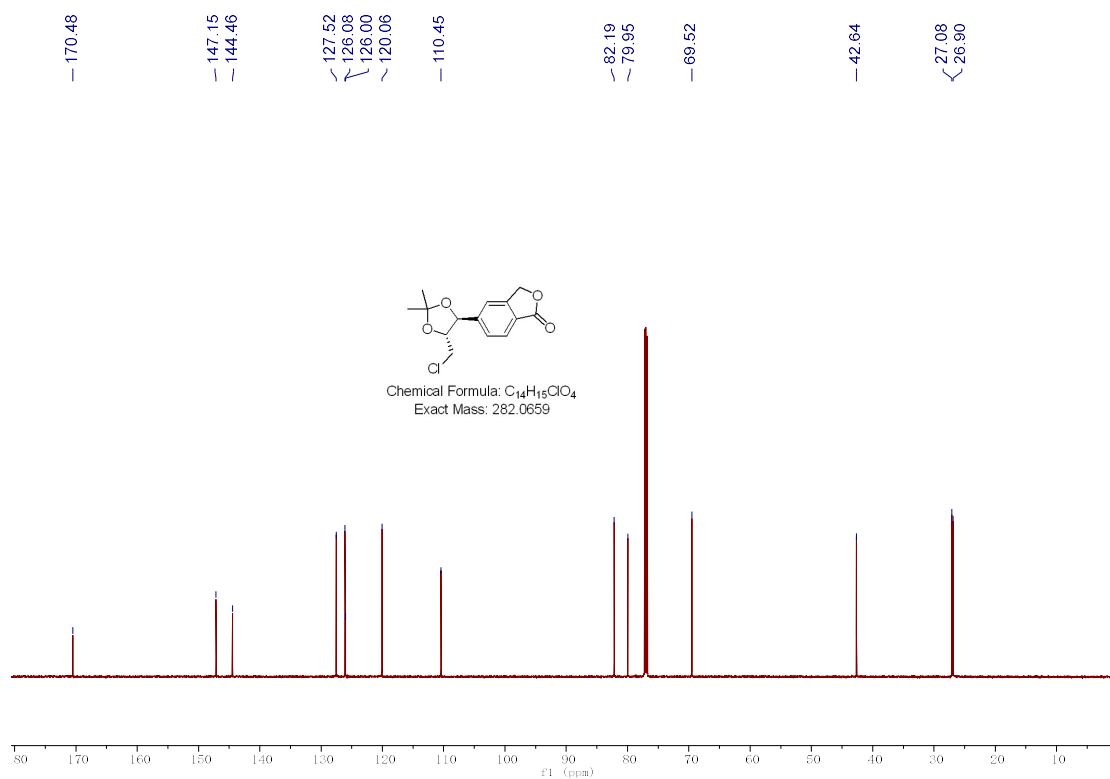

**<sup>13</sup>C NMR (151 MHz, CDCl<sub>3</sub>) Spectrum of 9j**

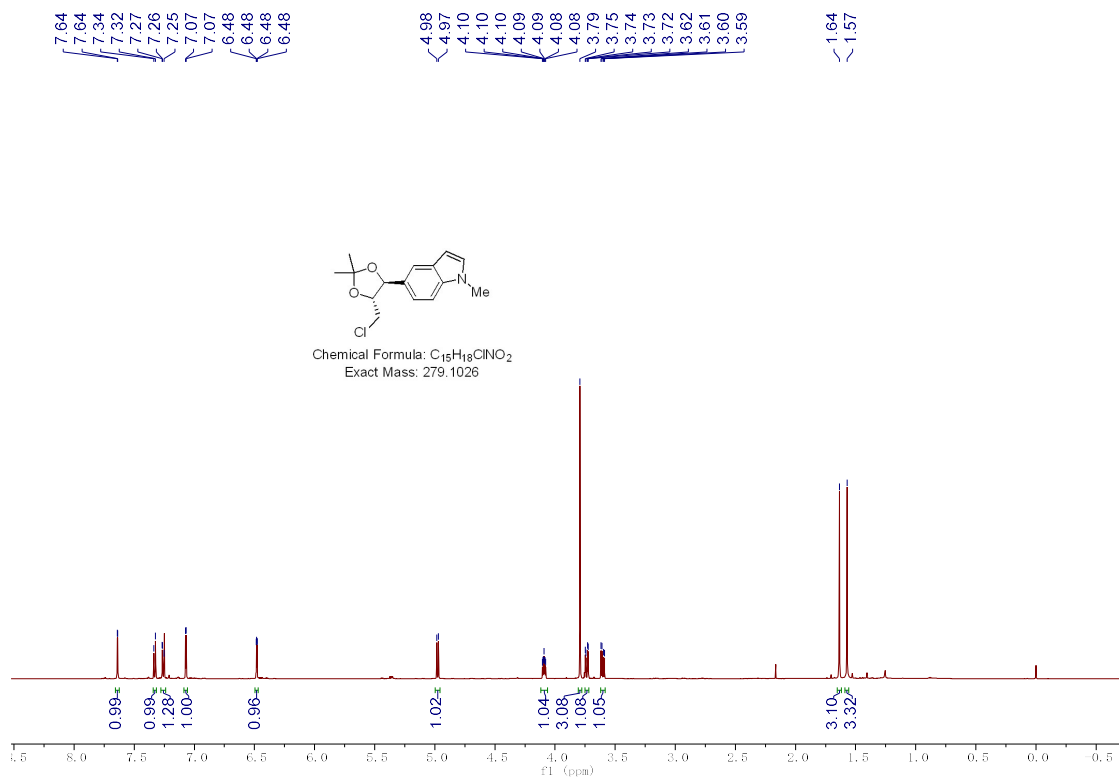

**$^1H$  NMR (600 MHz,  $CDCl_3$ ) Spectrum of 9k**

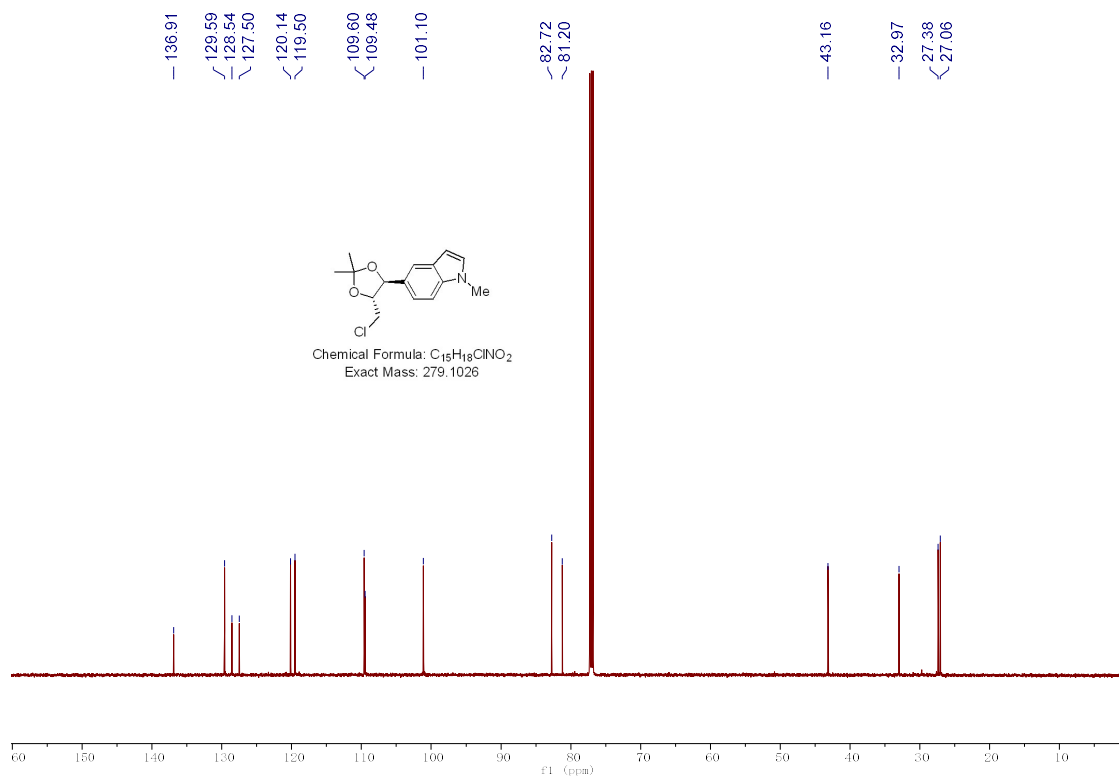

**$^{13}C$  NMR (151 MHz,  $CDCl_3$ ) Spectrum of 9k**

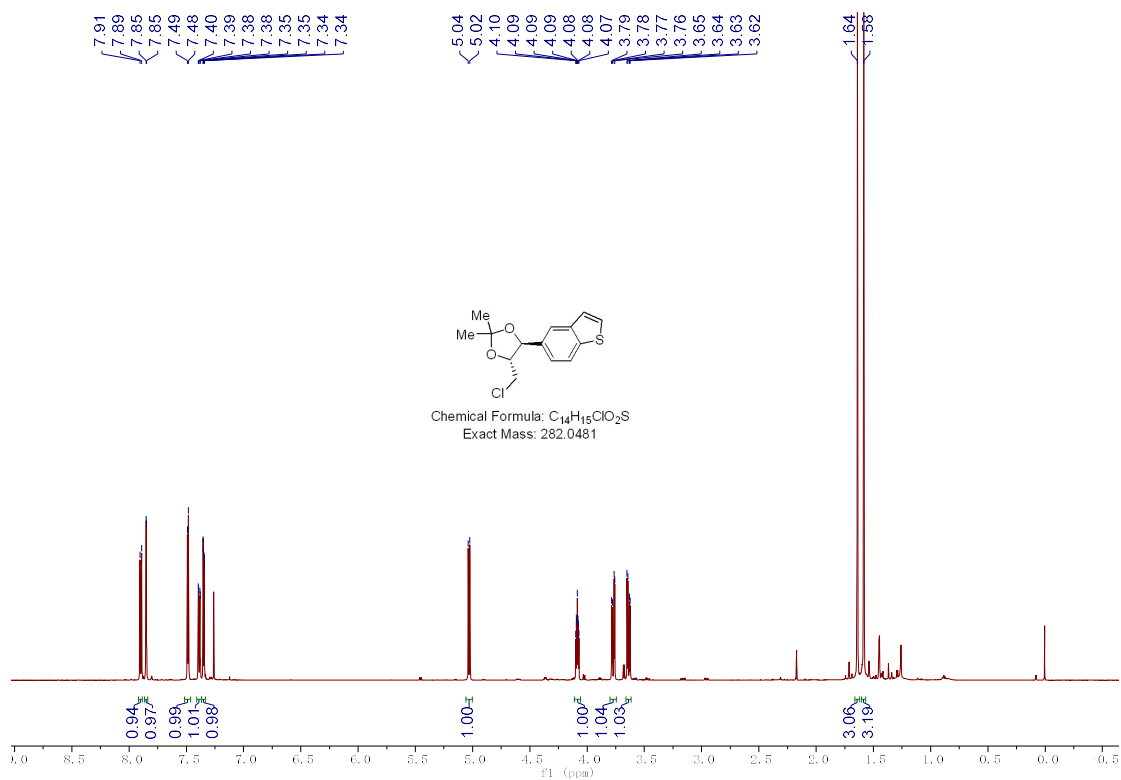

**<sup>1</sup>H NMR (600 MHz, CDCl<sub>3</sub>) Spectrum of 9l**

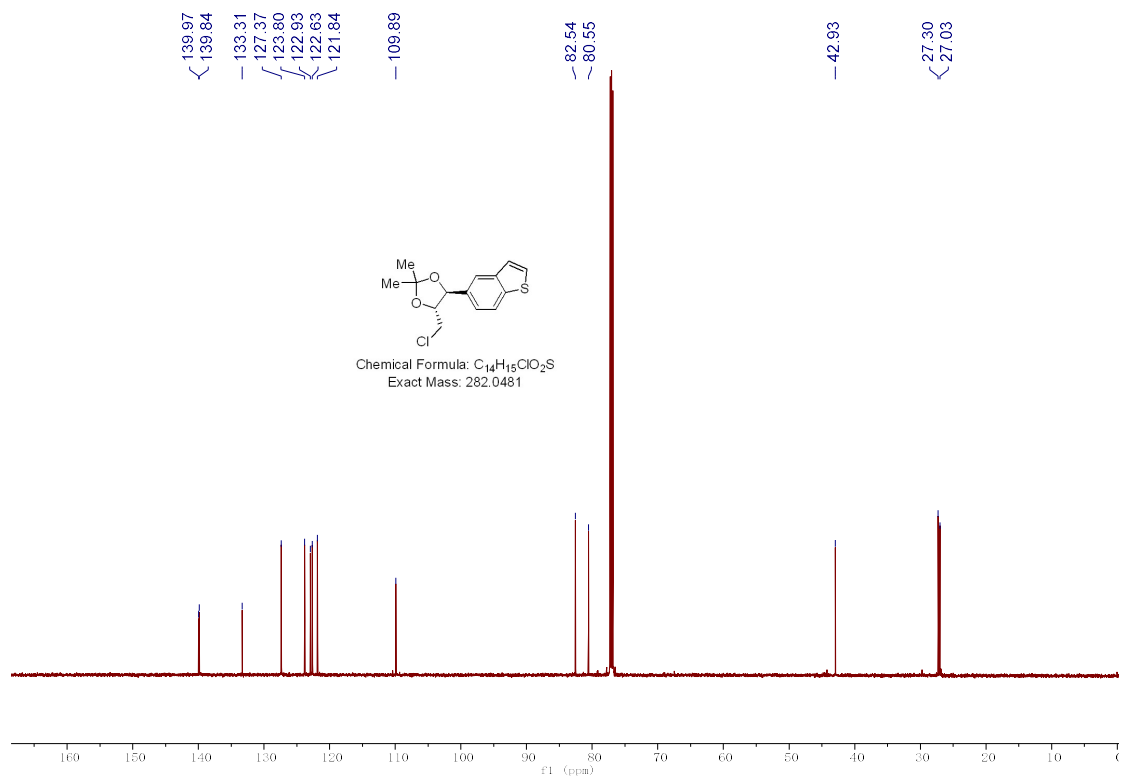

**<sup>13</sup>C NMR (151 MHz, CDCl<sub>3</sub>) Spectrum of 9l**

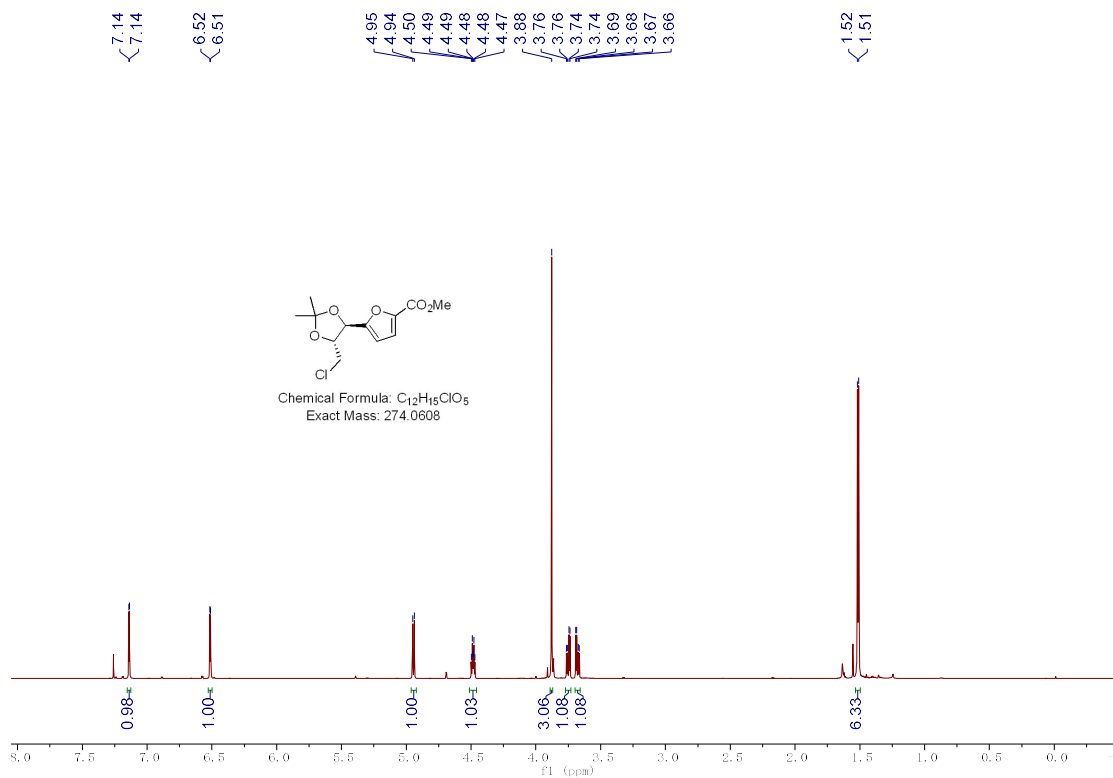

**<sup>1</sup>H NMR (600 MHz, CDCl<sub>3</sub>) Spectrum of 9m**

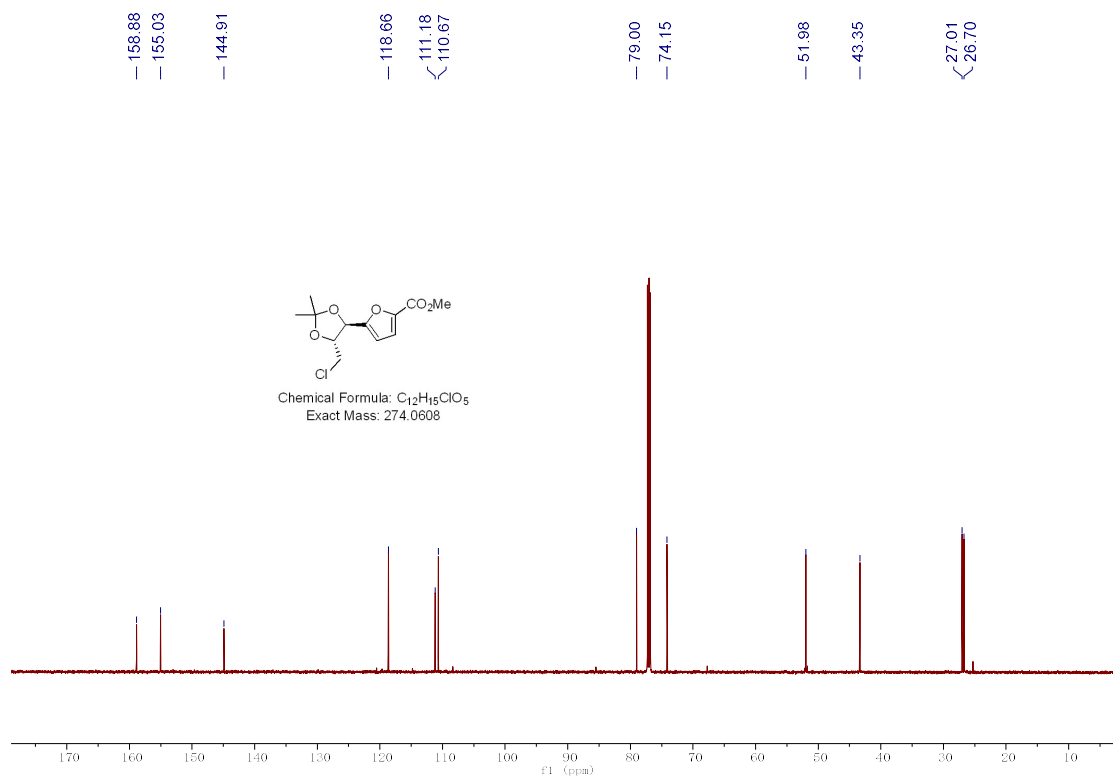

**<sup>13</sup>C NMR (151 MHz, CDCl<sub>3</sub>) Spectrum of 9m**

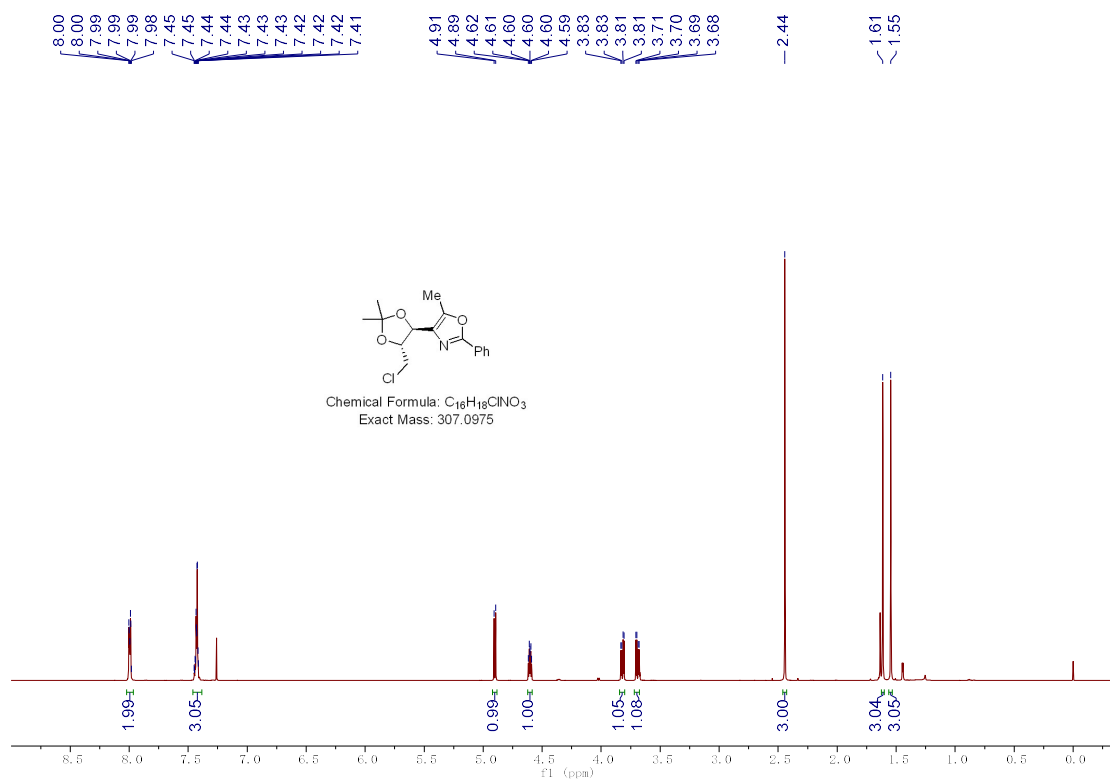

**<sup>1</sup>H NMR (600 MHz, CDCl<sub>3</sub>) Spectrum of 9n**

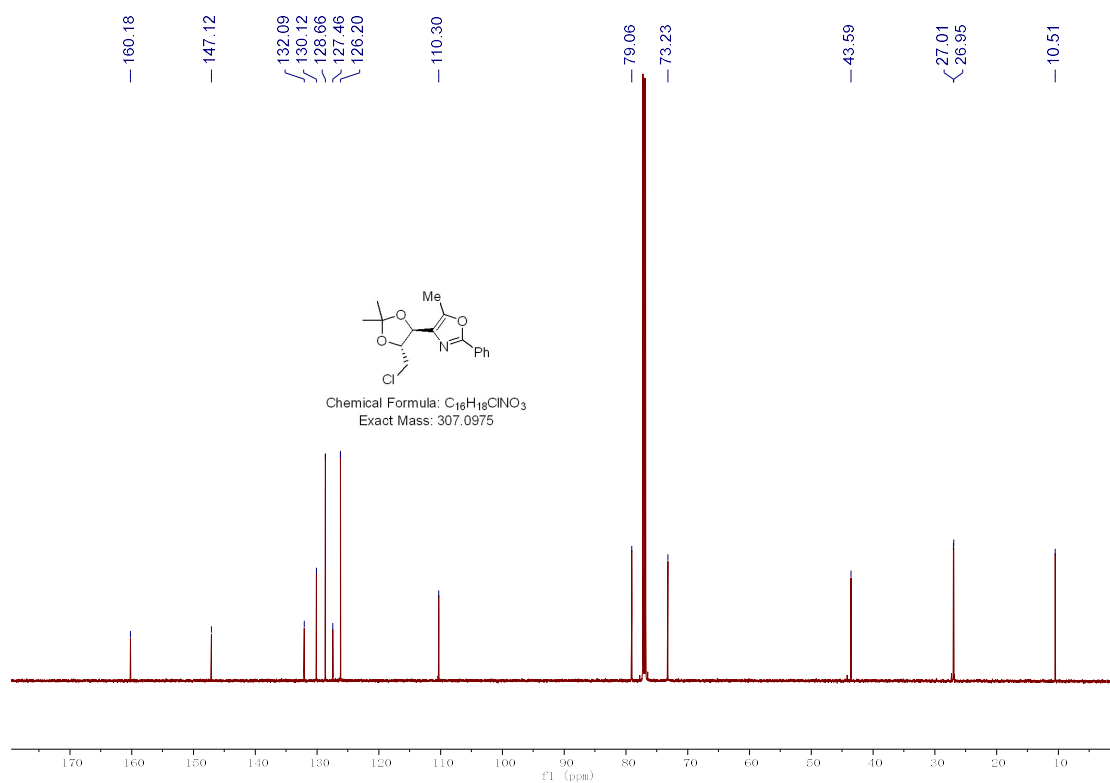

**<sup>13</sup>C NMR (151 MHz, CDCl<sub>3</sub>) Spectrum of 9n**



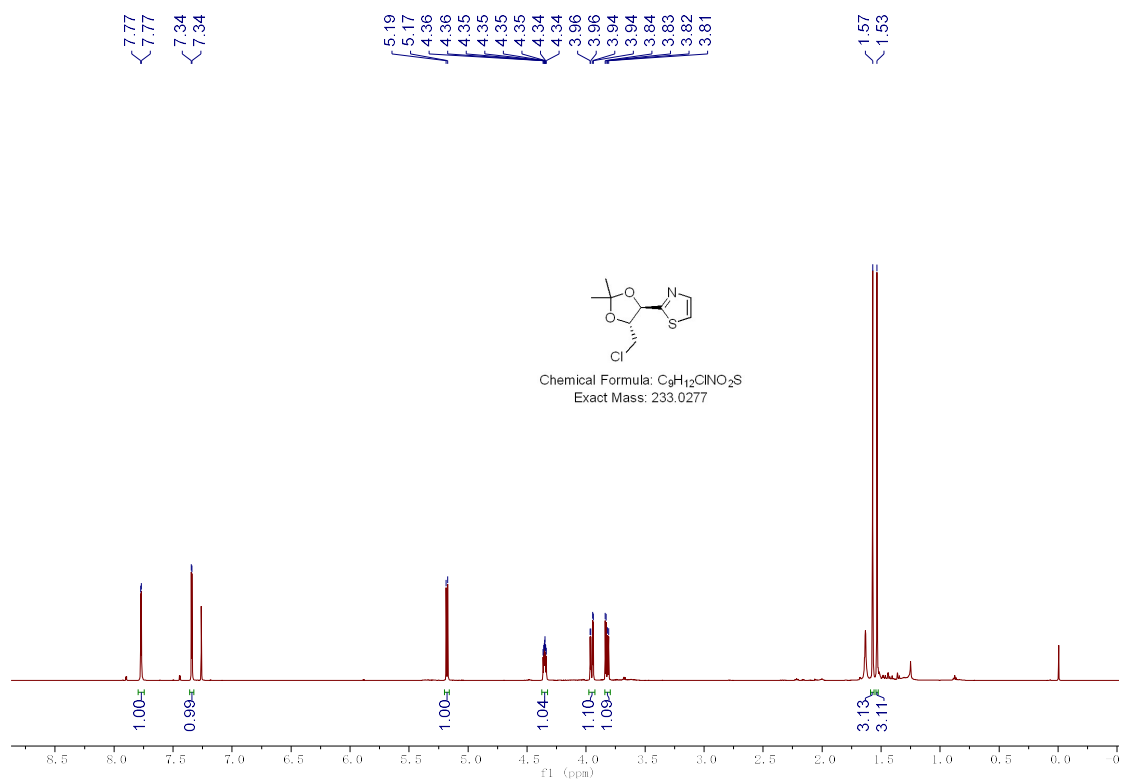

**<sup>1</sup>H NMR (600 MHz, CDCl<sub>3</sub>) Spectrum of 9o**

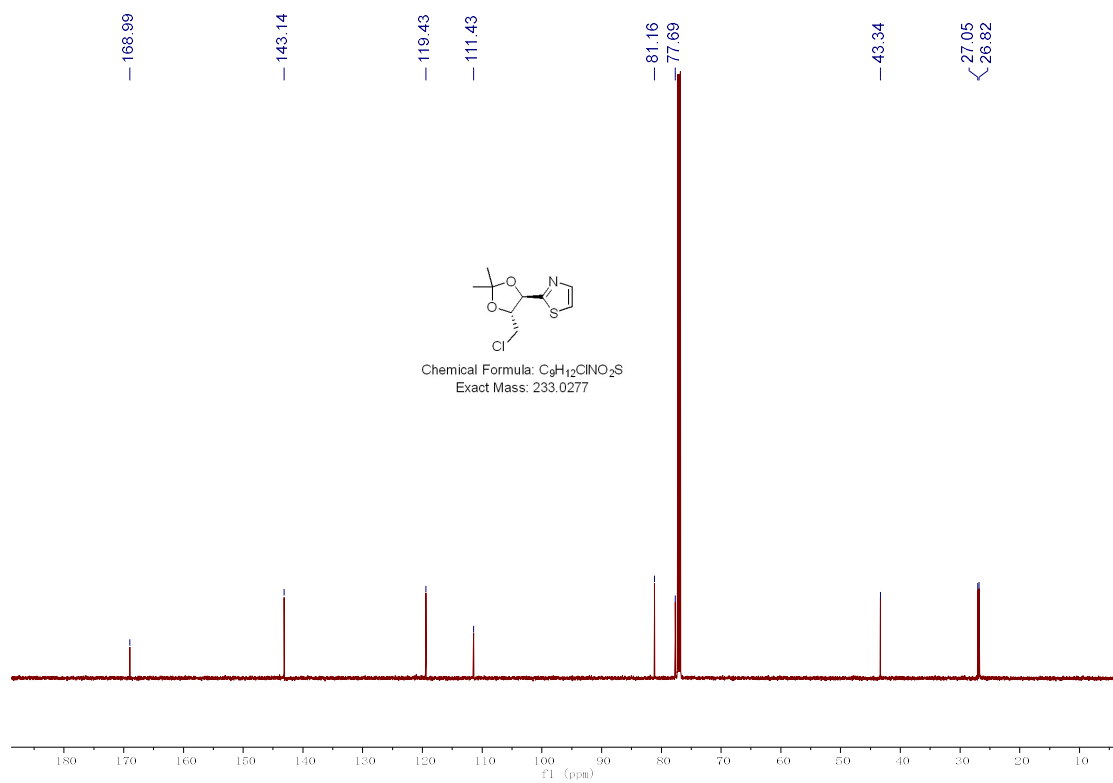

**<sup>13</sup>C NMR (151 MHz, CDCl<sub>3</sub>) Spectrum of 9o**

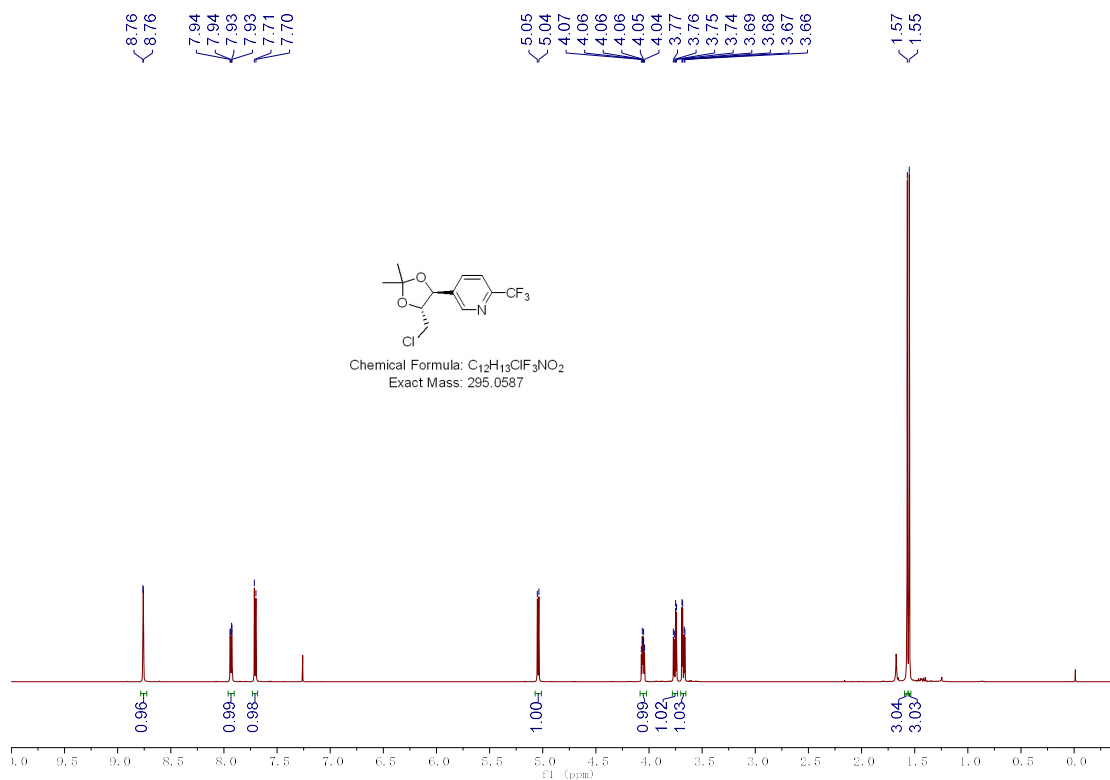

**<sup>1</sup>H NMR (600 MHz, CDCl<sub>3</sub>) Spectrum of 9p**

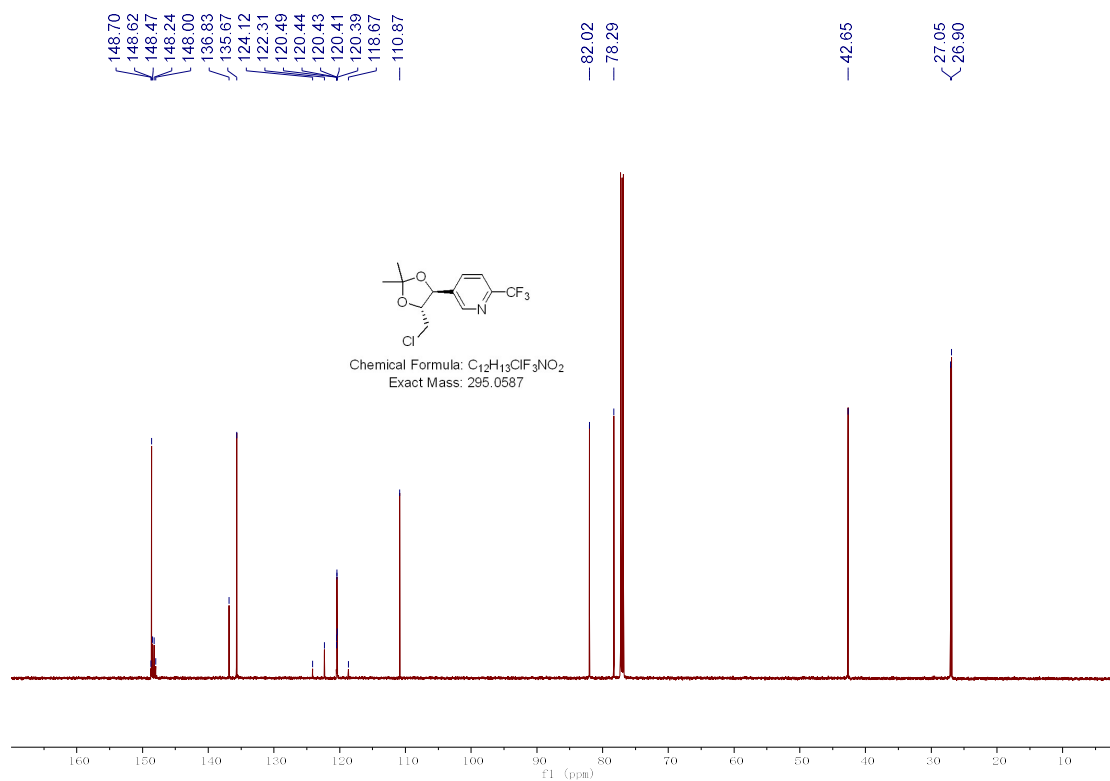

**<sup>13</sup>C NMR (151 MHz, CDCl<sub>3</sub>) Spectrum of 9p**

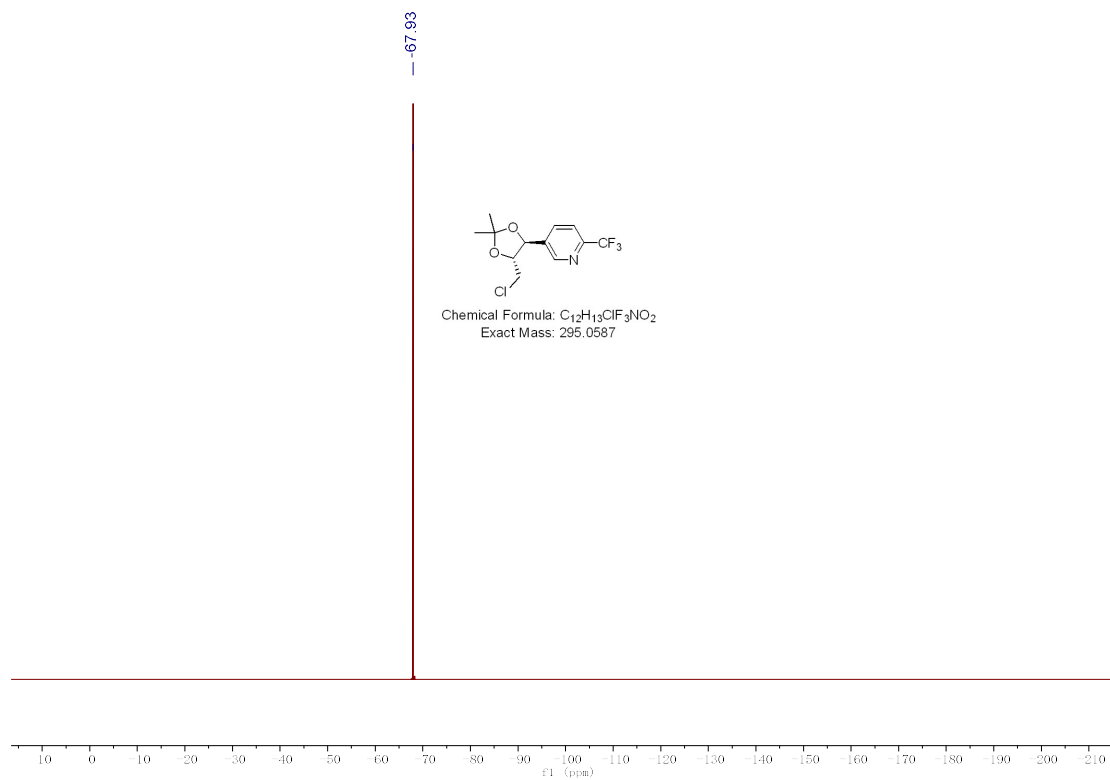

**$^{19}\text{F}$  NMR (565 MHz,  $\text{CDCl}_3$ ) Spectrum of 9p**

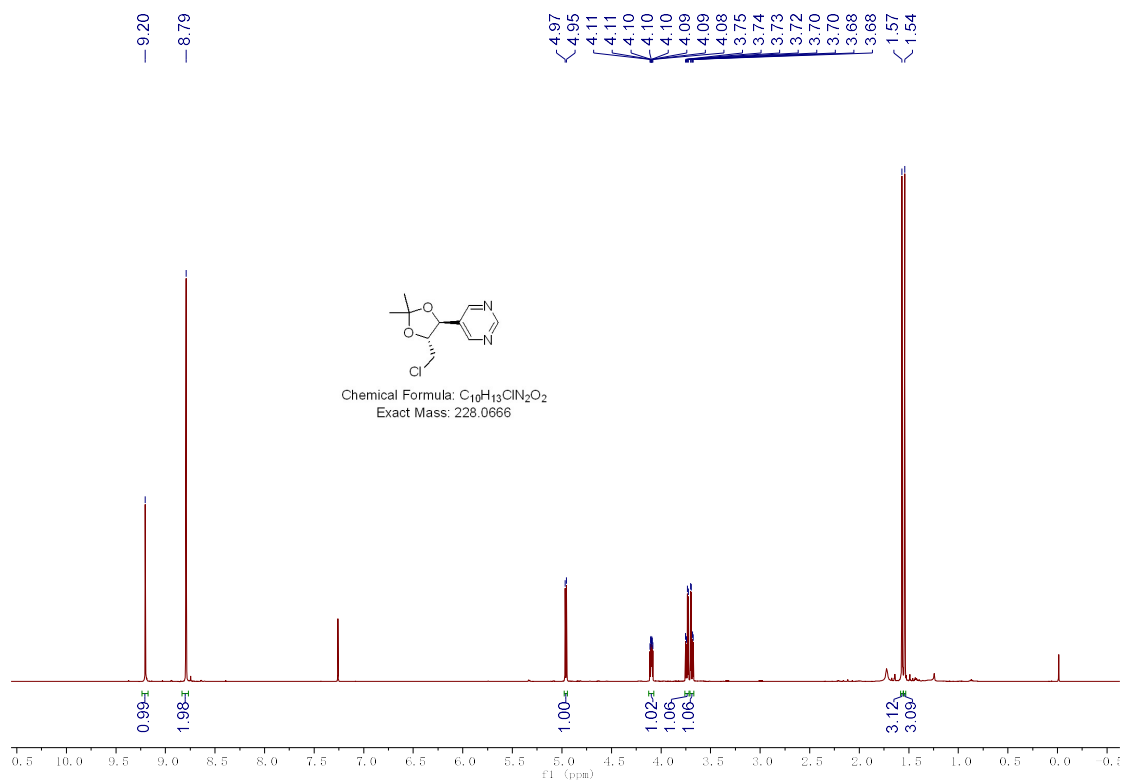

**<sup>1</sup>H NMR (600 MHz, CDCl<sub>3</sub>) Spectrum of 9q**

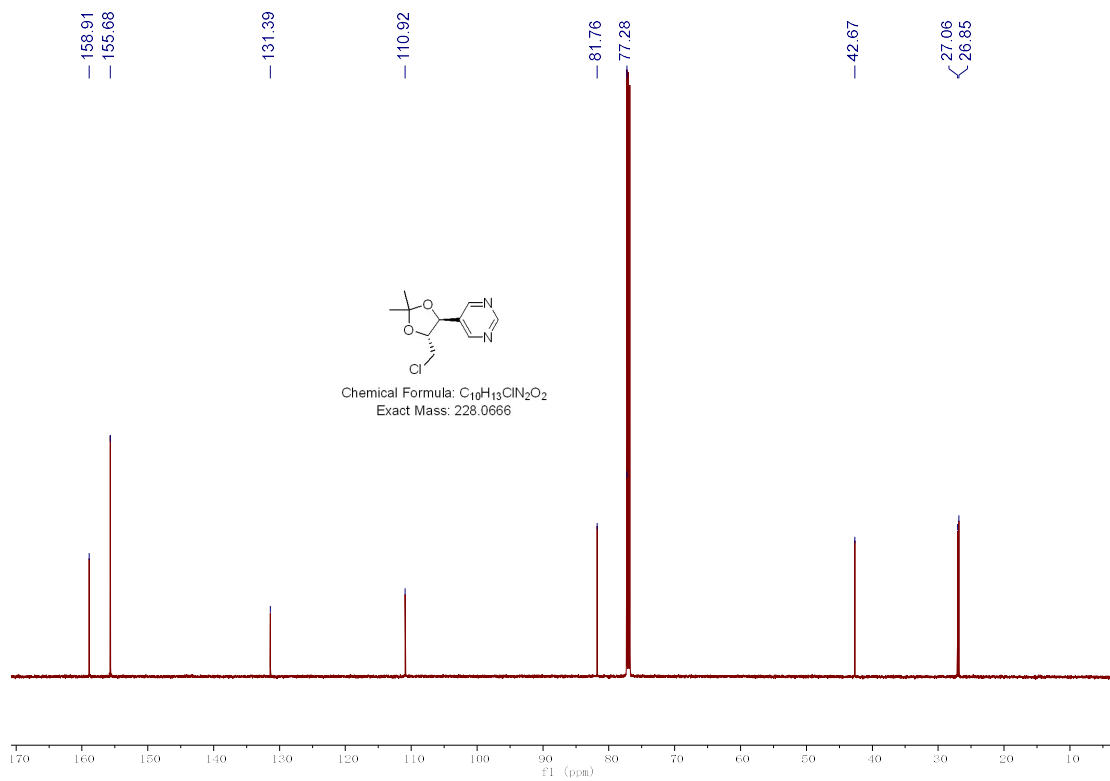

**<sup>13</sup>C NMR (565 MHz, CDCl<sub>3</sub>) Spectrum of 9q**

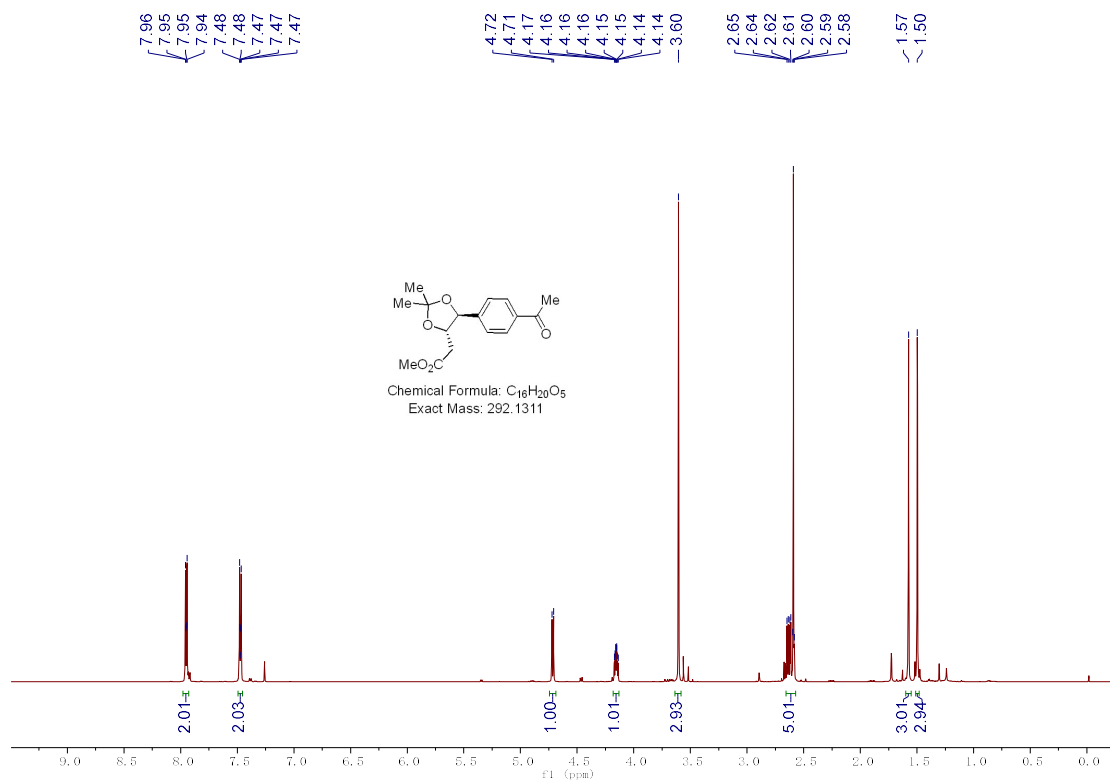

**<sup>1</sup>H NMR (600 MHz, CDCl<sub>3</sub>) Spectrum of 9r**

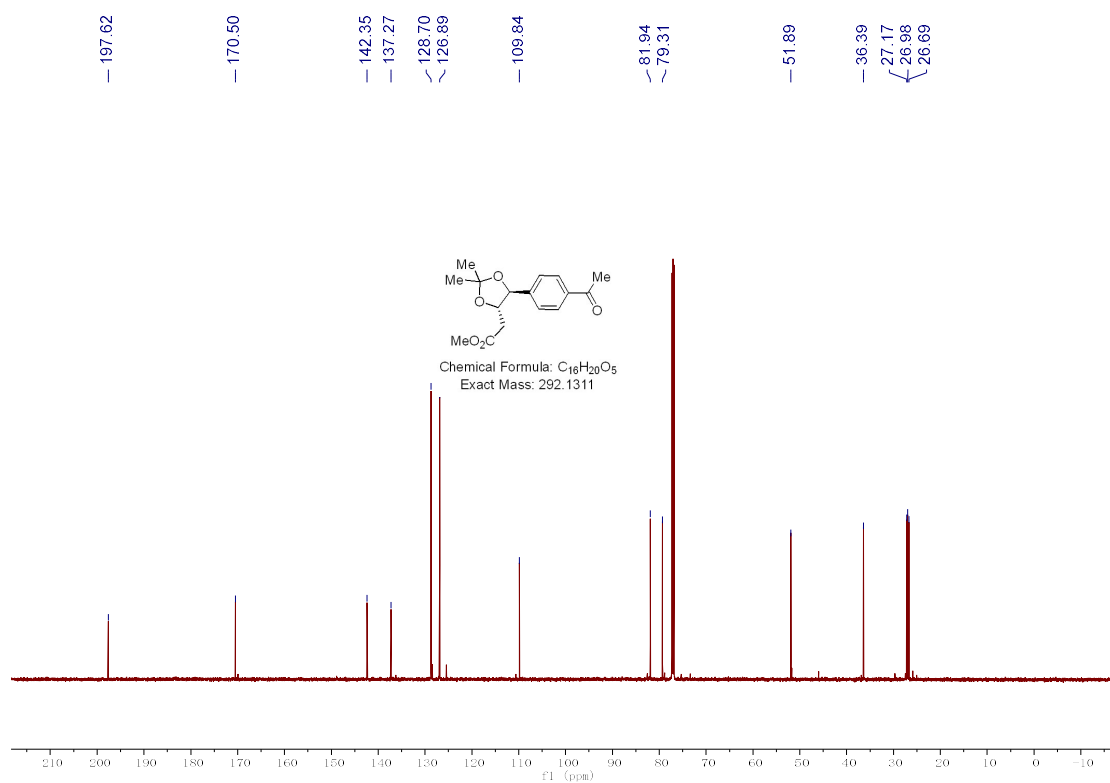

**<sup>13</sup>C NMR (151 MHz, CDCl<sub>3</sub>) Spectrum of 9r**

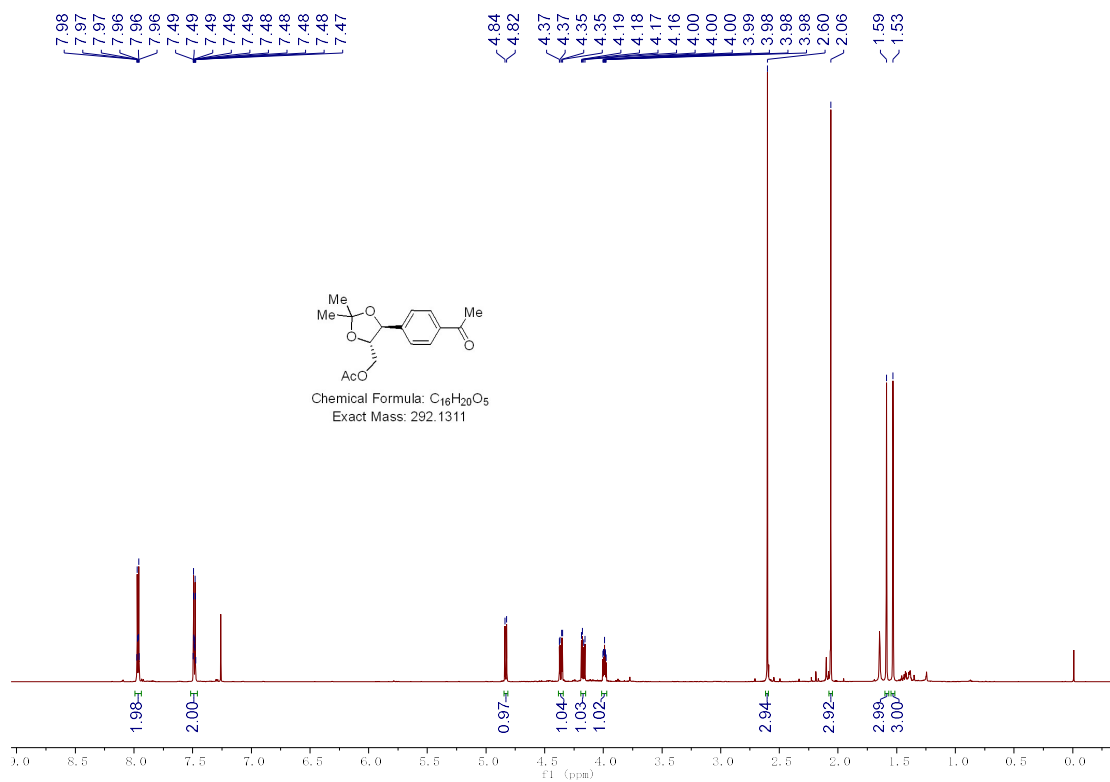

**<sup>1</sup>H NMR (600 MHz, CDCl<sub>3</sub>) Spectrum of 9s**

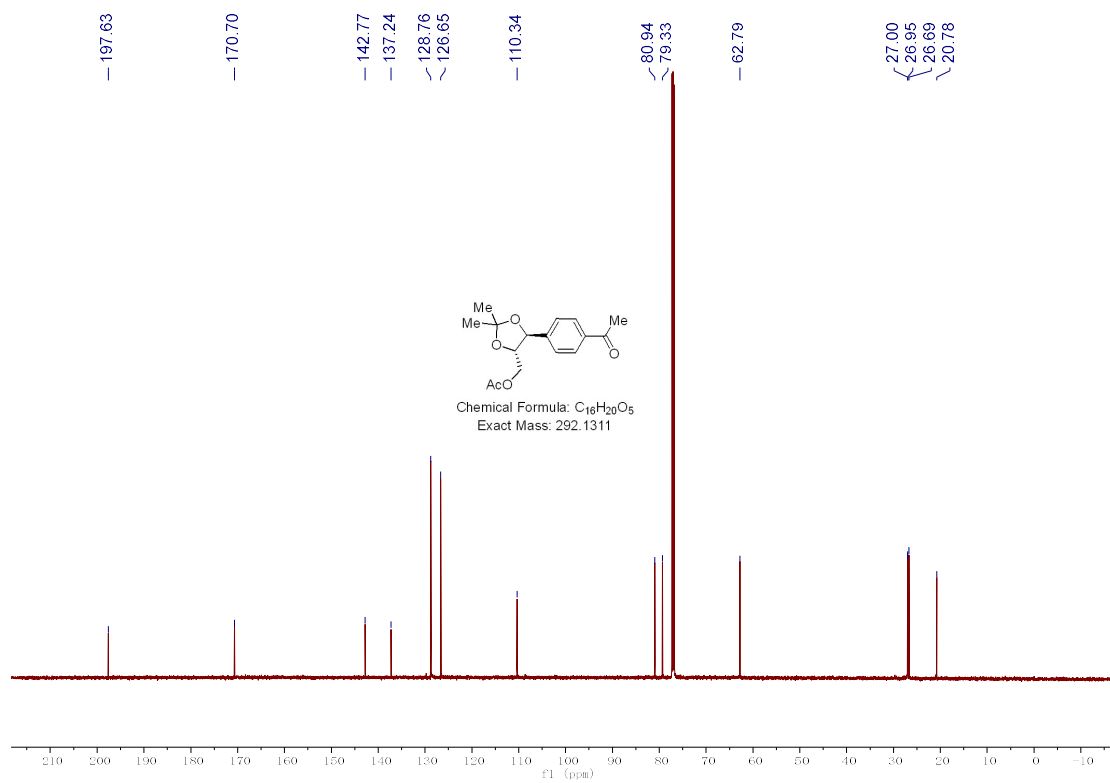

**<sup>13</sup>C NMR (151 MHz, CDCl<sub>3</sub>) Spectrum of 9s**

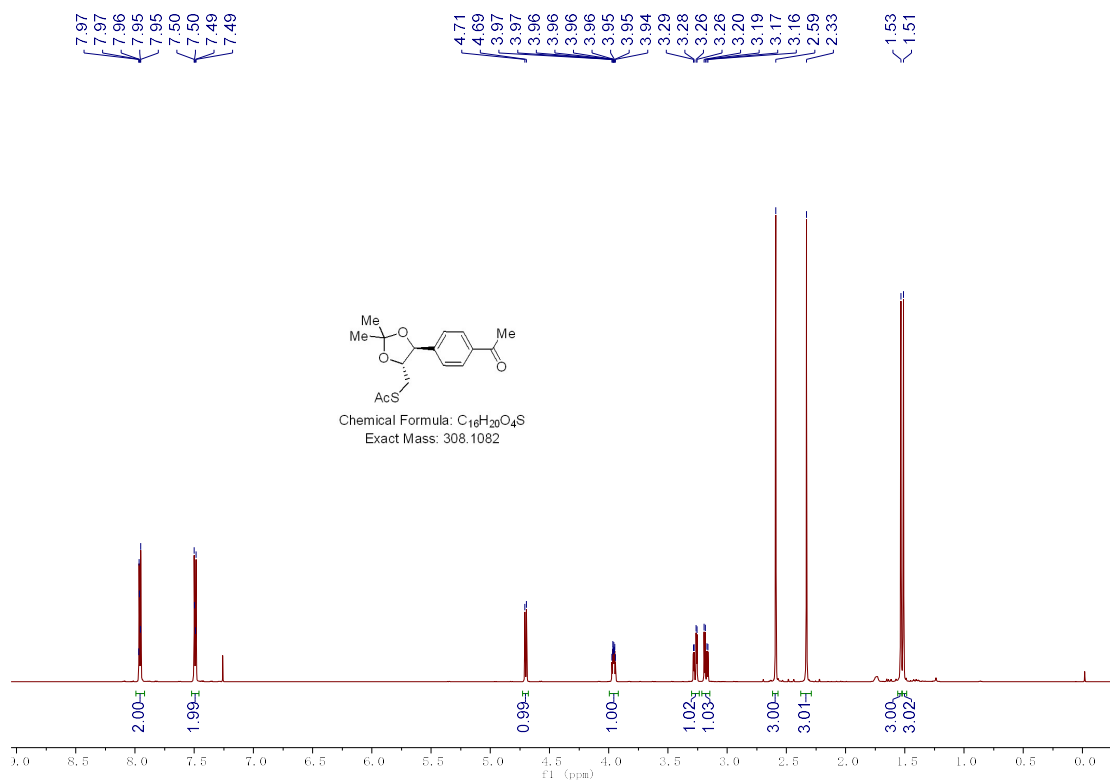

**<sup>1</sup>H NMR (600 MHz, CDCl<sub>3</sub>) Spectrum of 9t**

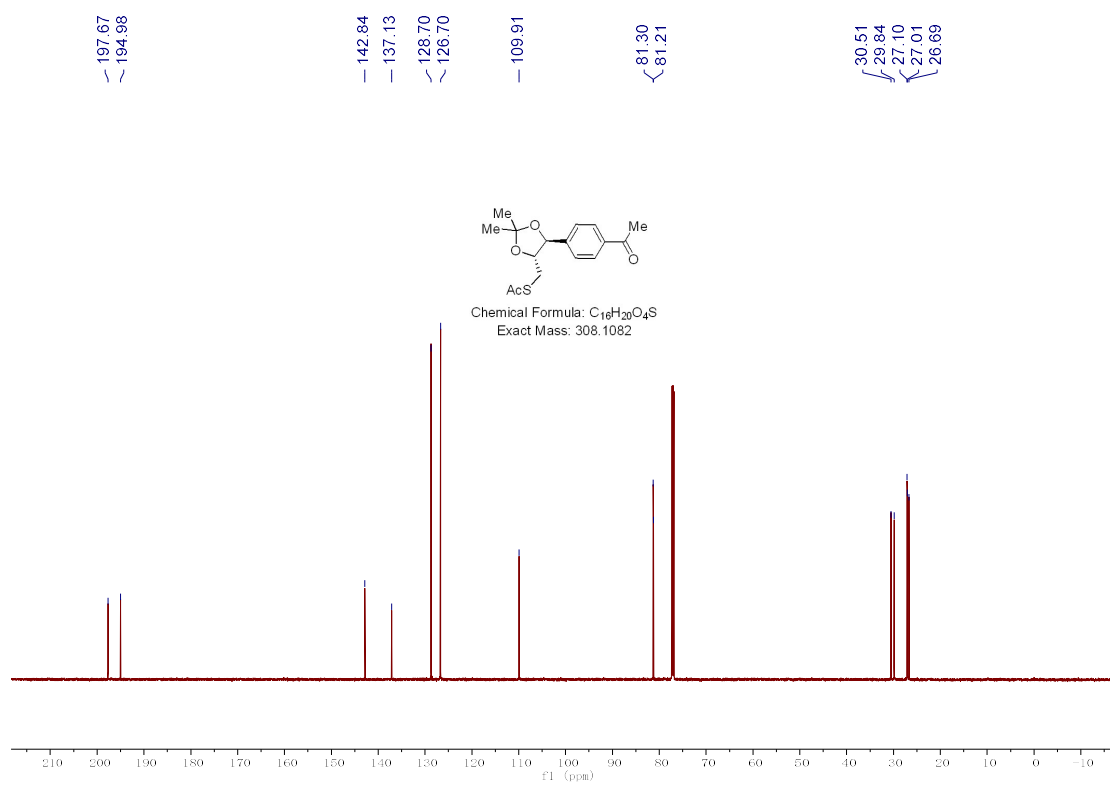

**<sup>13</sup>C NMR (151 MHz, CDCl<sub>3</sub>) Spectrum of 9t**

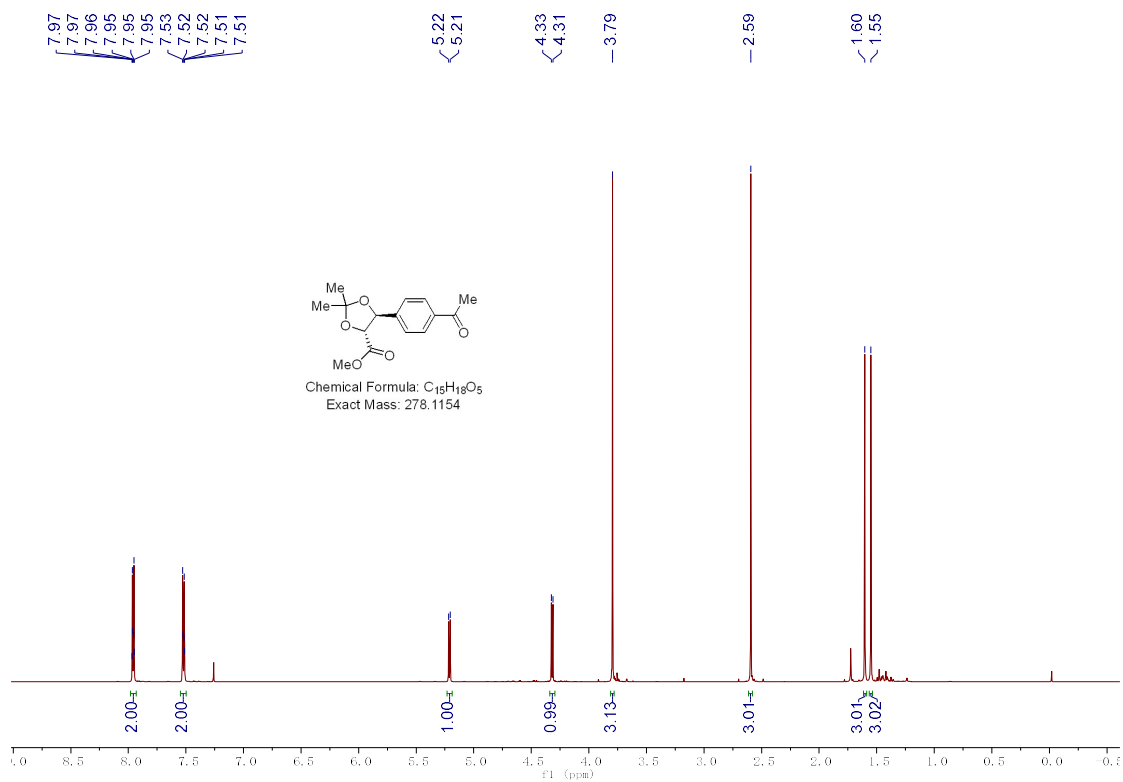

**<sup>1</sup>H NMR (600 MHz, CDCl<sub>3</sub>) Spectrum of 9u**

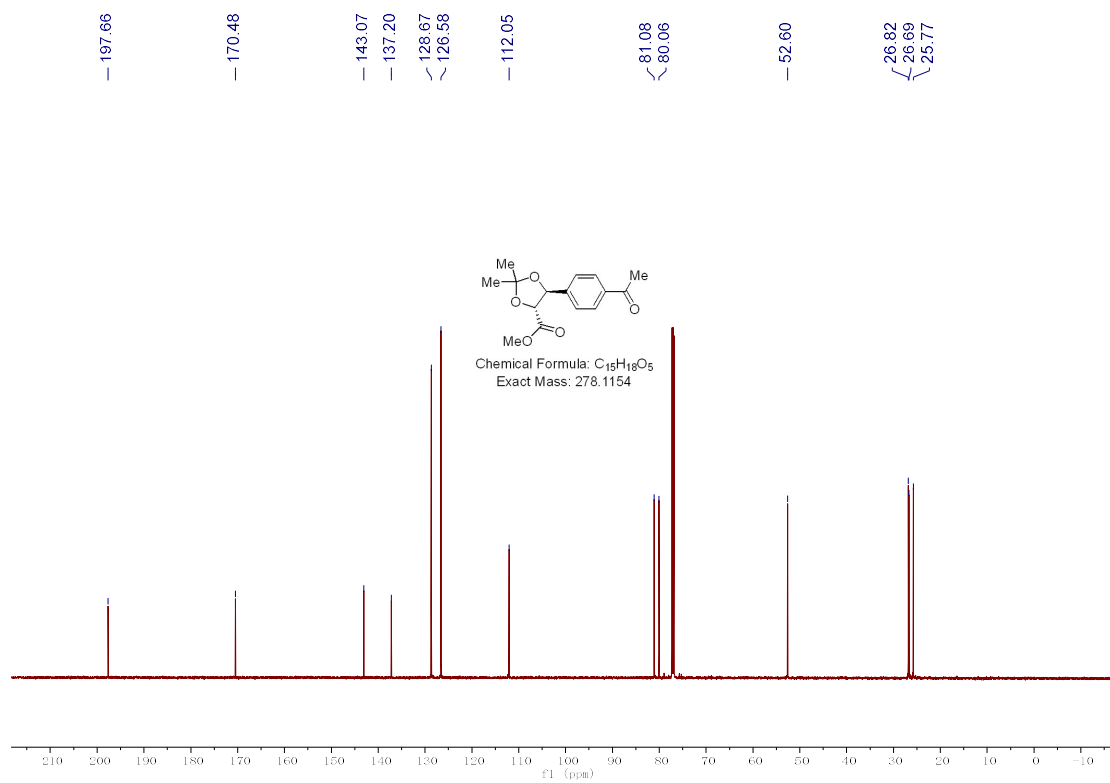

**<sup>13</sup>C NMR (151 MHz, CDCl<sub>3</sub>) Spectrum of 9u**



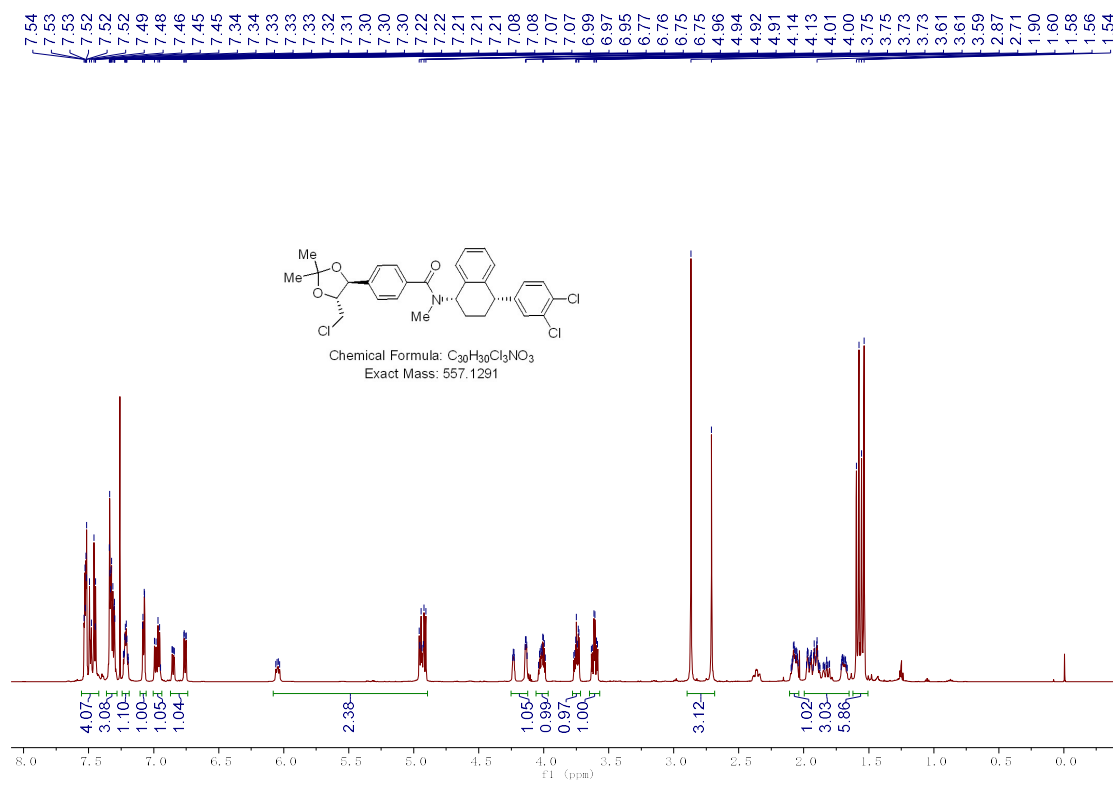

**$^1H$  NMR (600 MHz,  $CDCl_3$ ) Spectrum of 9v**

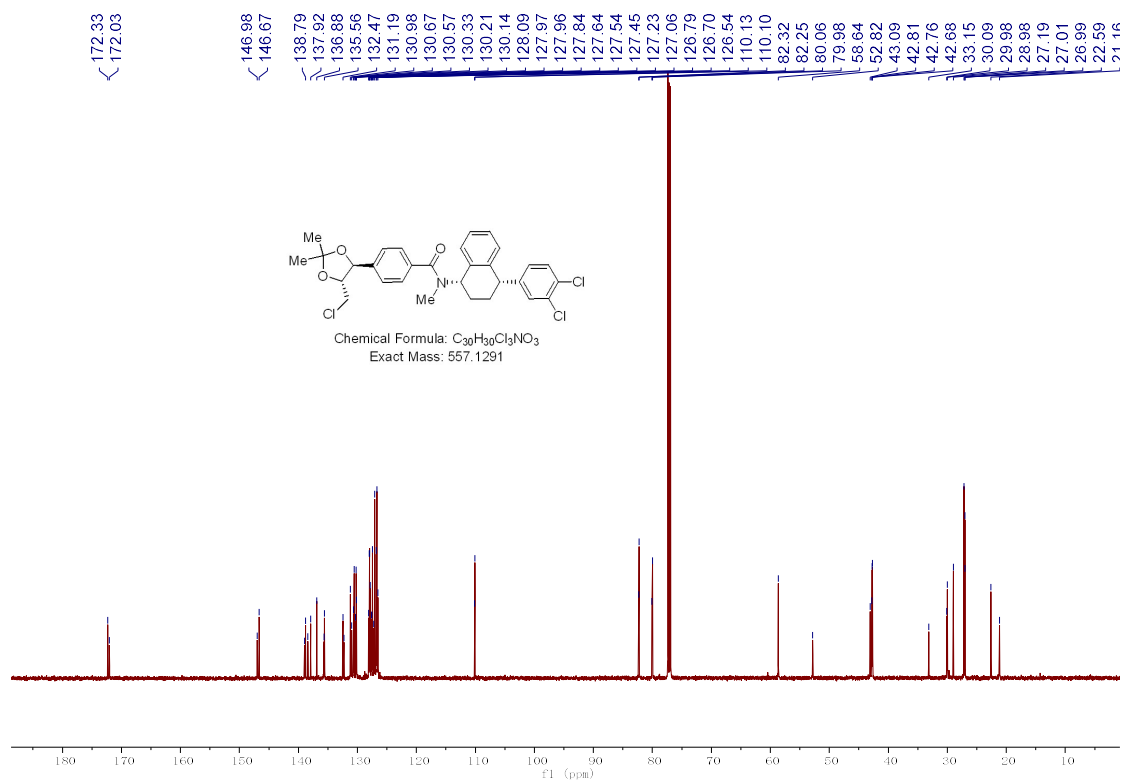

**$^{13}C$  NMR (151 MHz,  $CDCl_3$ ) Spectrum of 9v**

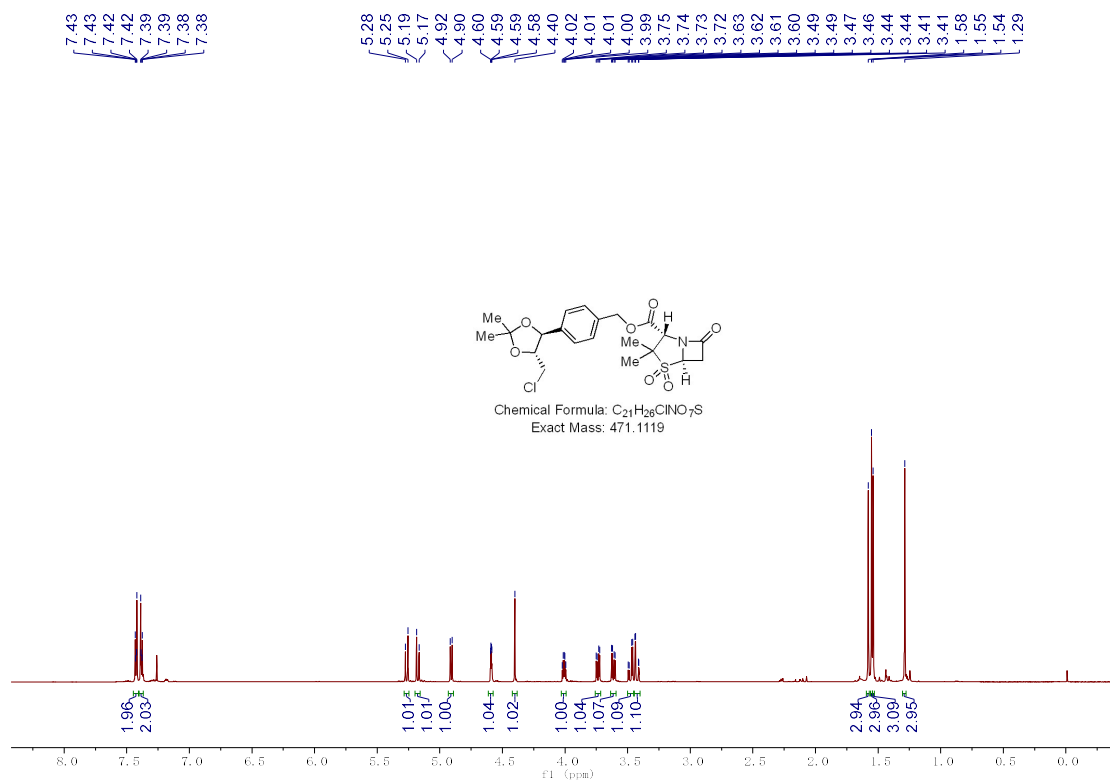

**<sup>1</sup>H NMR (600 MHz, CDCl<sub>3</sub>) Spectrum of 9w**

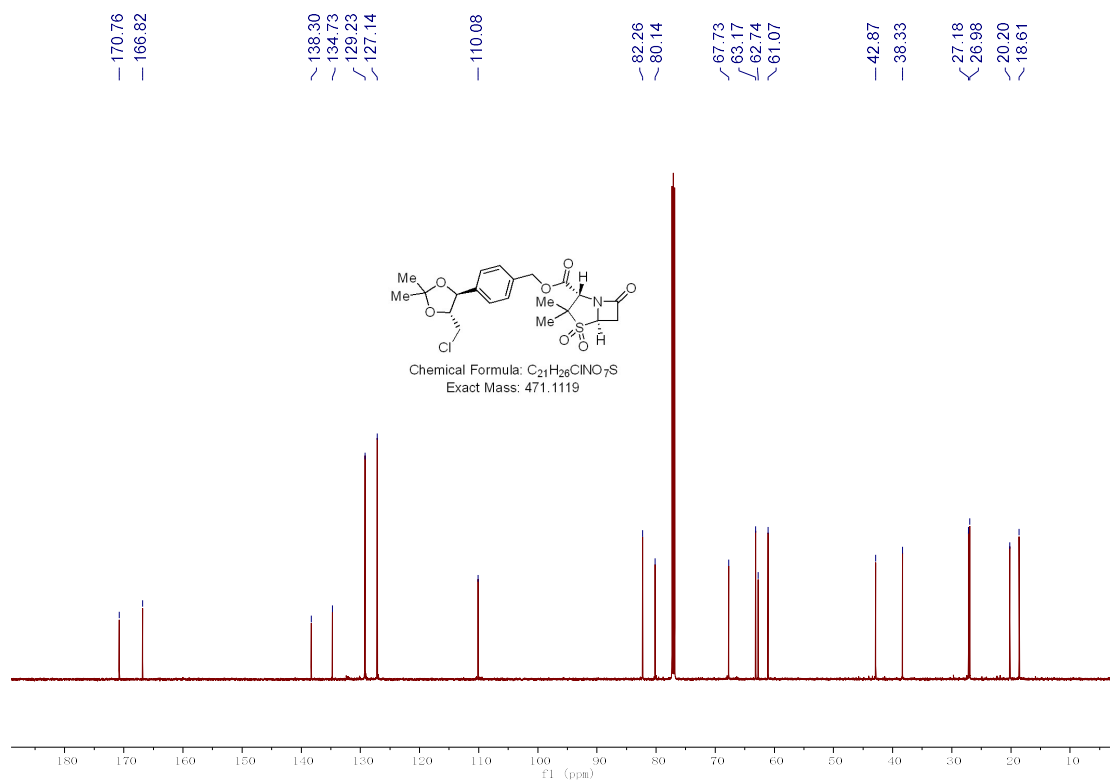

**<sup>13</sup>C NMR (151 MHz, CDCl<sub>3</sub>) Spectrum of 9w**

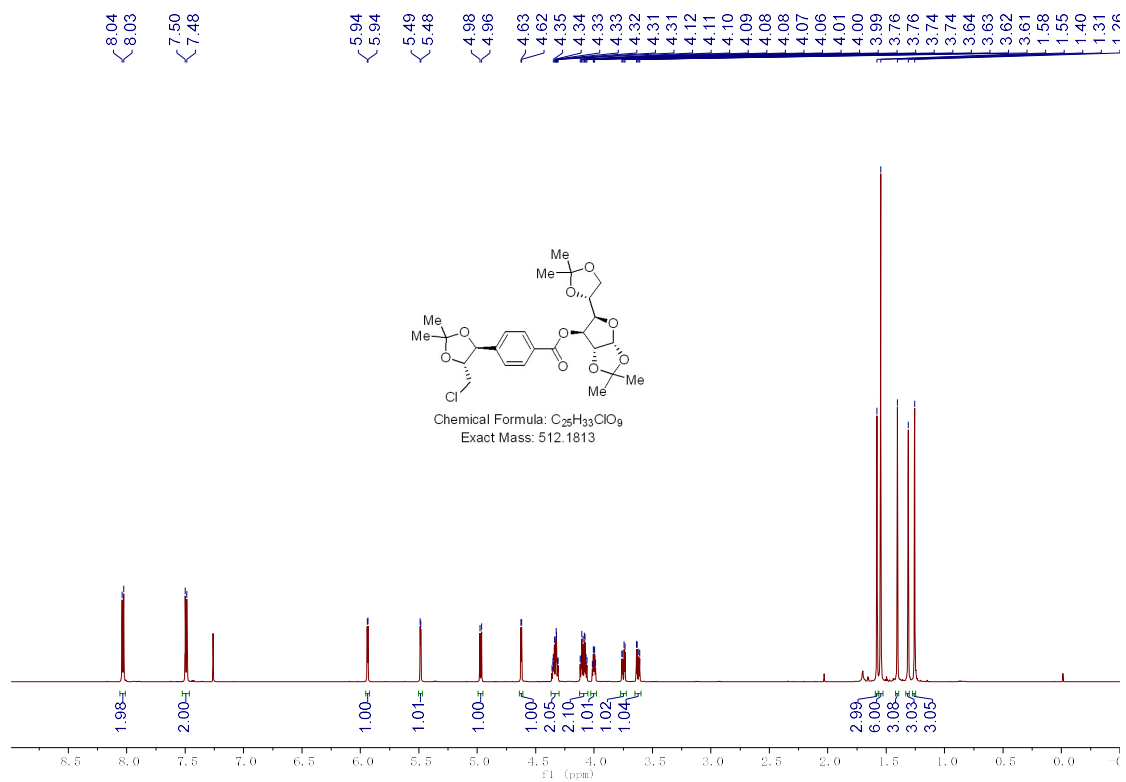

**<sup>1</sup>H NMR (600 MHz, CDCl<sub>3</sub>) Spectrum of 9x**

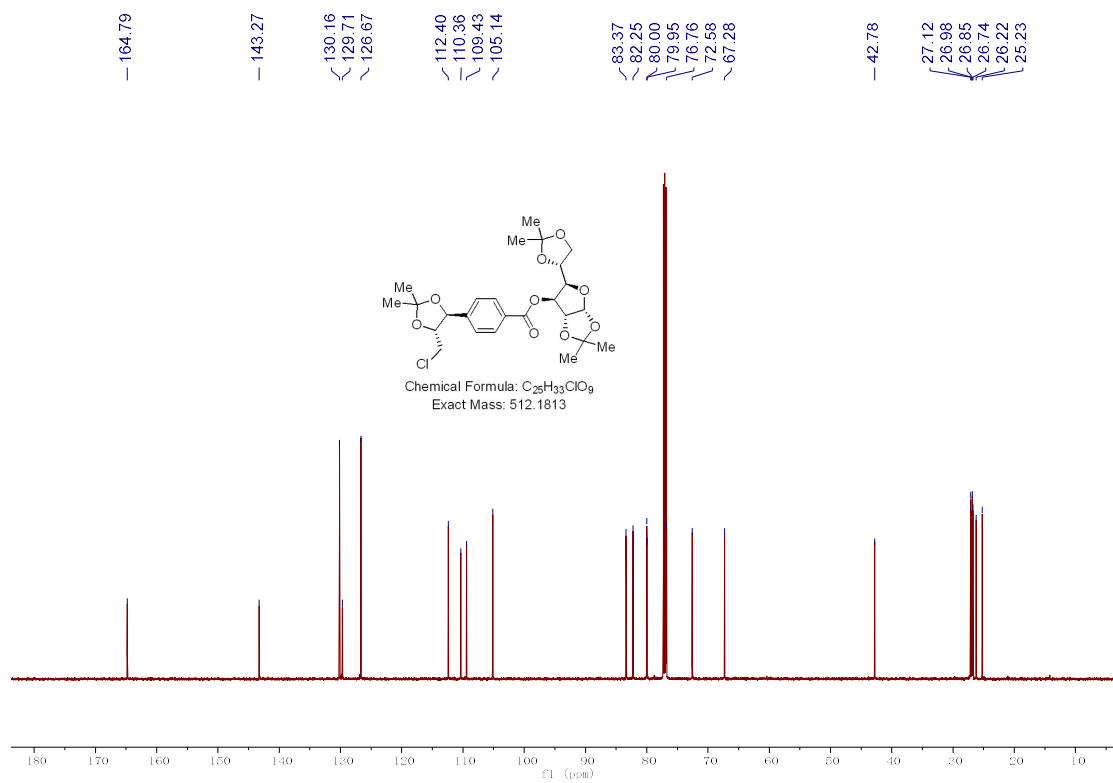

**<sup>13</sup>C NMR (151 MHz, CDCl<sub>3</sub>) Spectrum of 9x**

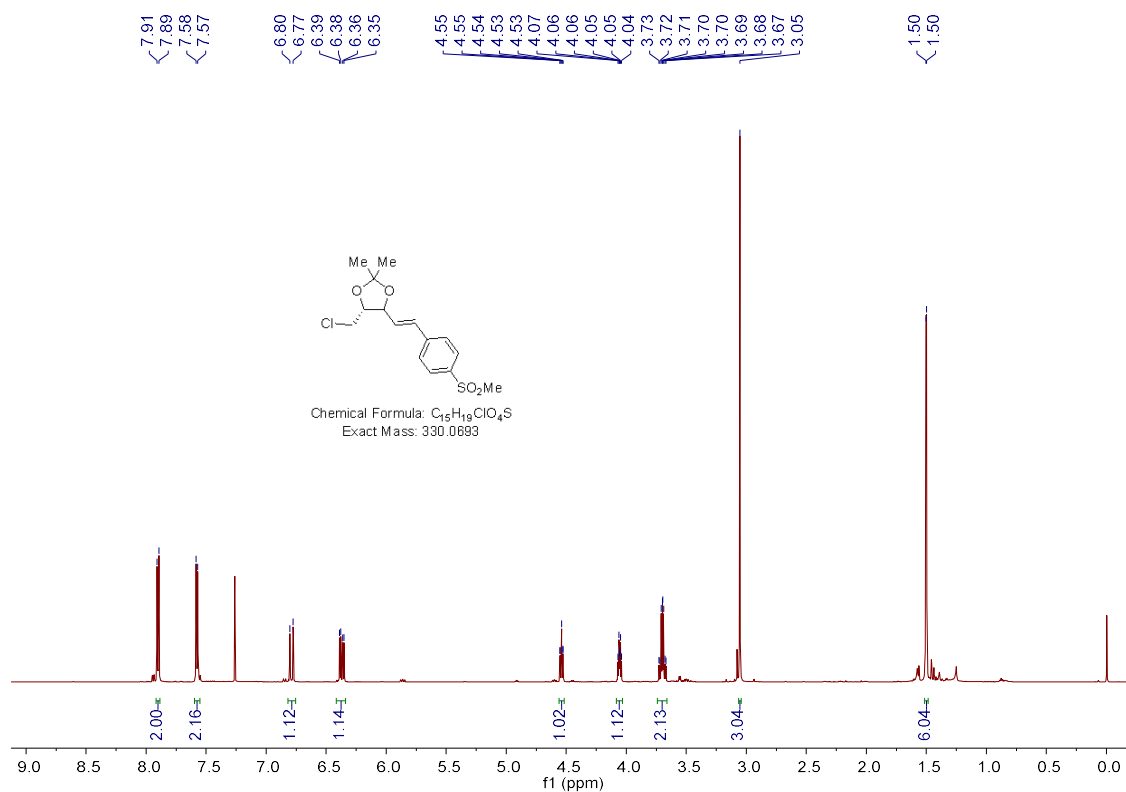

<sup>1</sup>H NMR (600 MHz, CDCl<sub>3</sub>) Spectrum of 9y

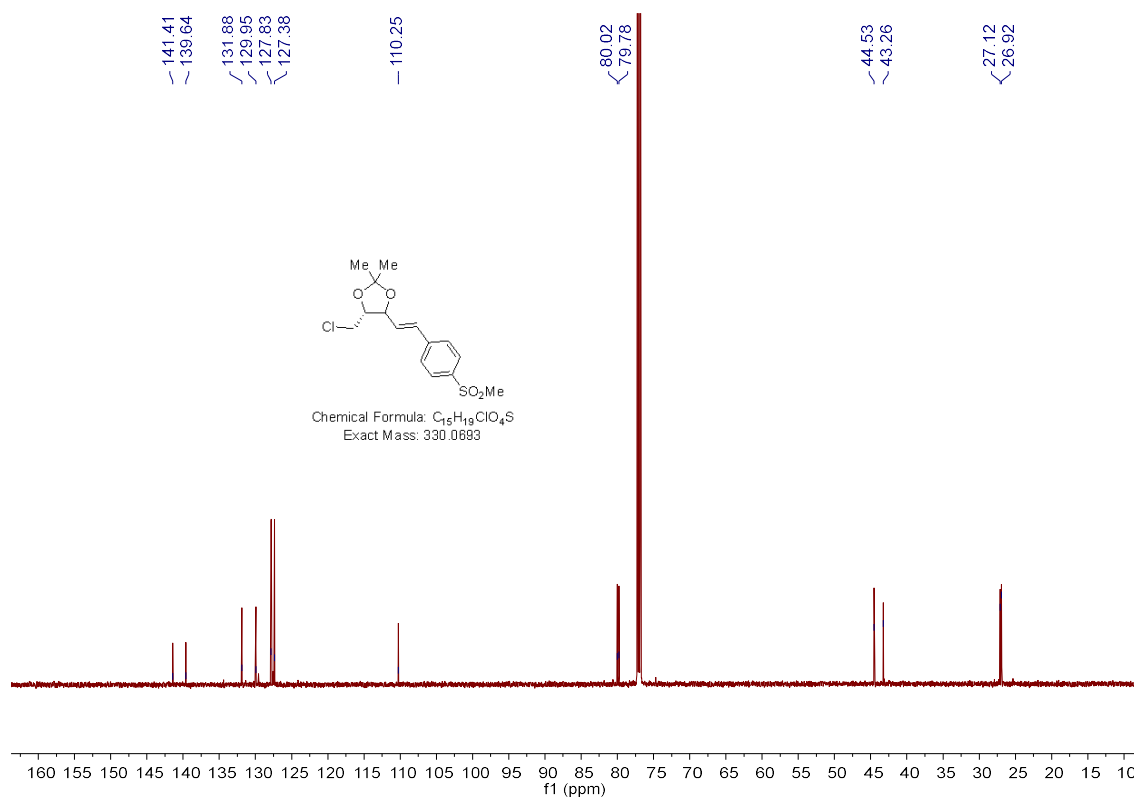

<sup>13</sup>C NMR (151 MHz, CDCl<sub>3</sub>) Spectrum of 9y

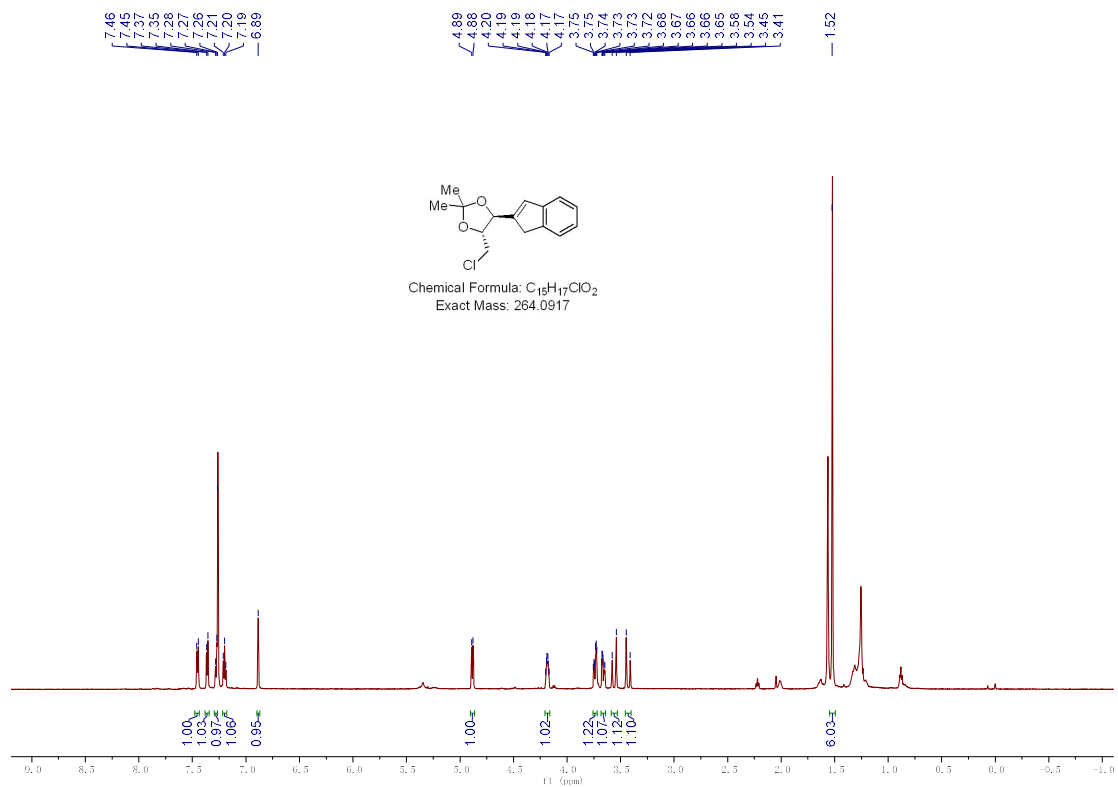

**<sup>1</sup>H NMR (600 MHz, CDCl<sub>3</sub>) Spectrum of 9z**

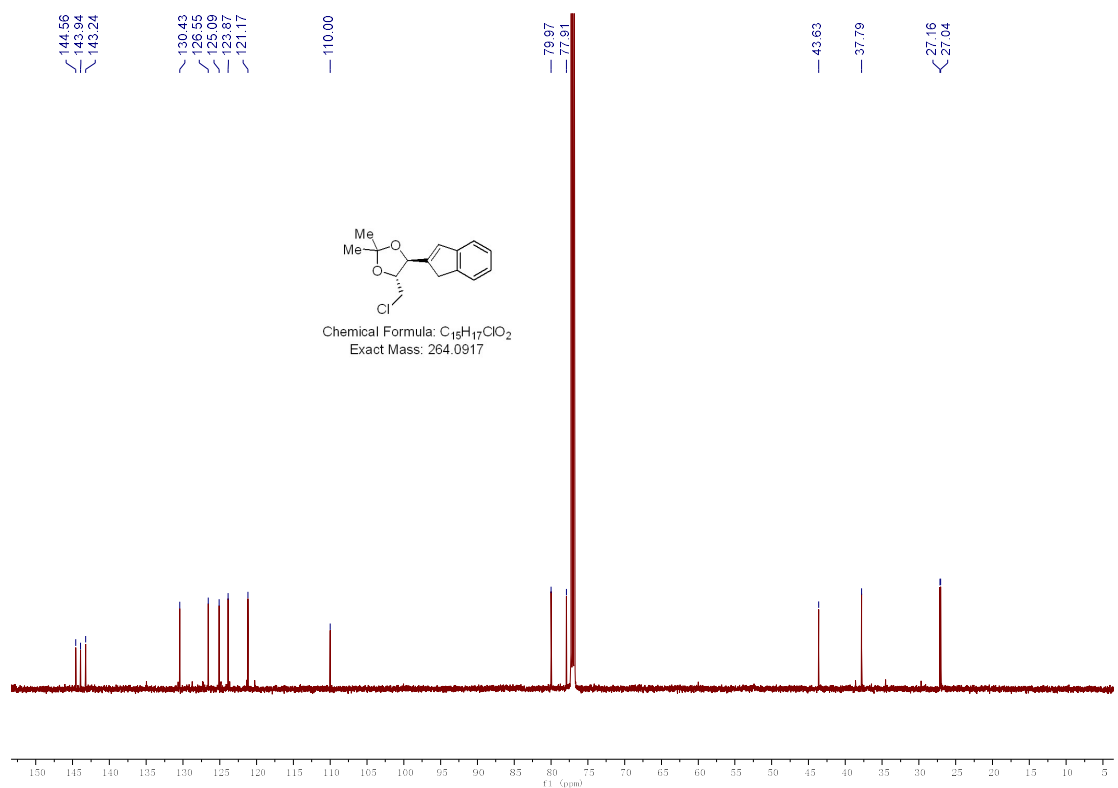

**<sup>13</sup>C NMR (151 MHz, CDCl<sub>3</sub>) Spectrum of 9z**

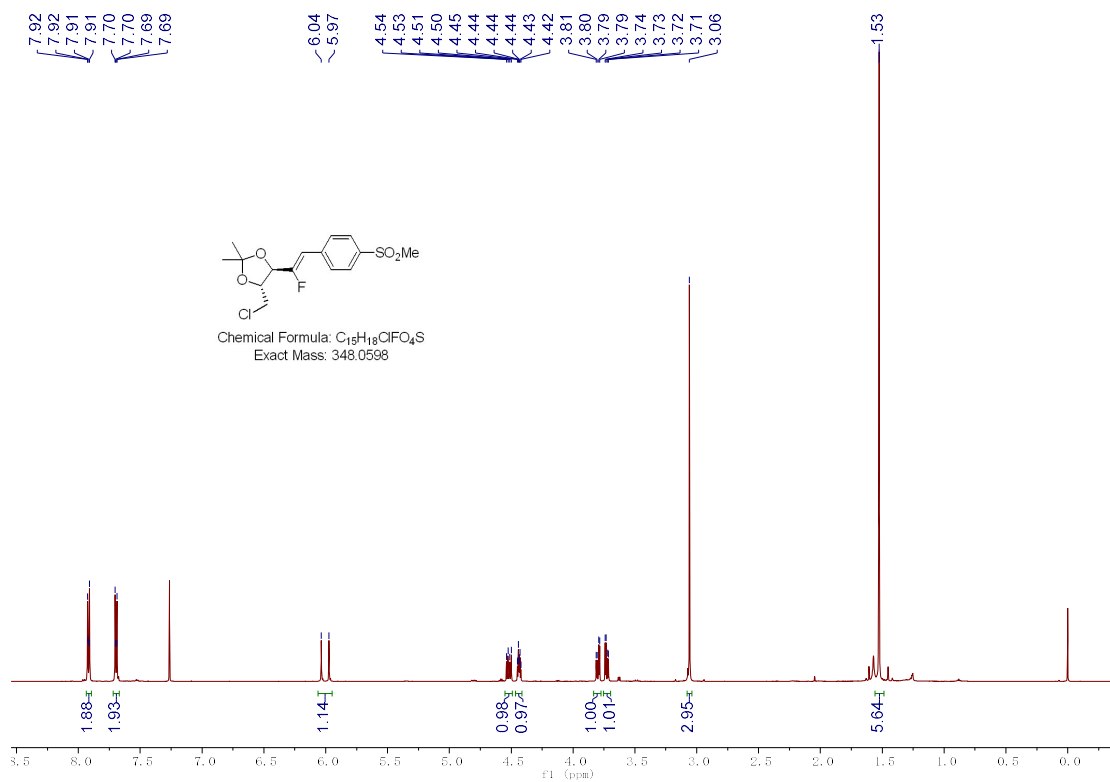

**$^1H$  NMR (600 MHz,  $CDCl_3$ ) Spectrum of 9aa**

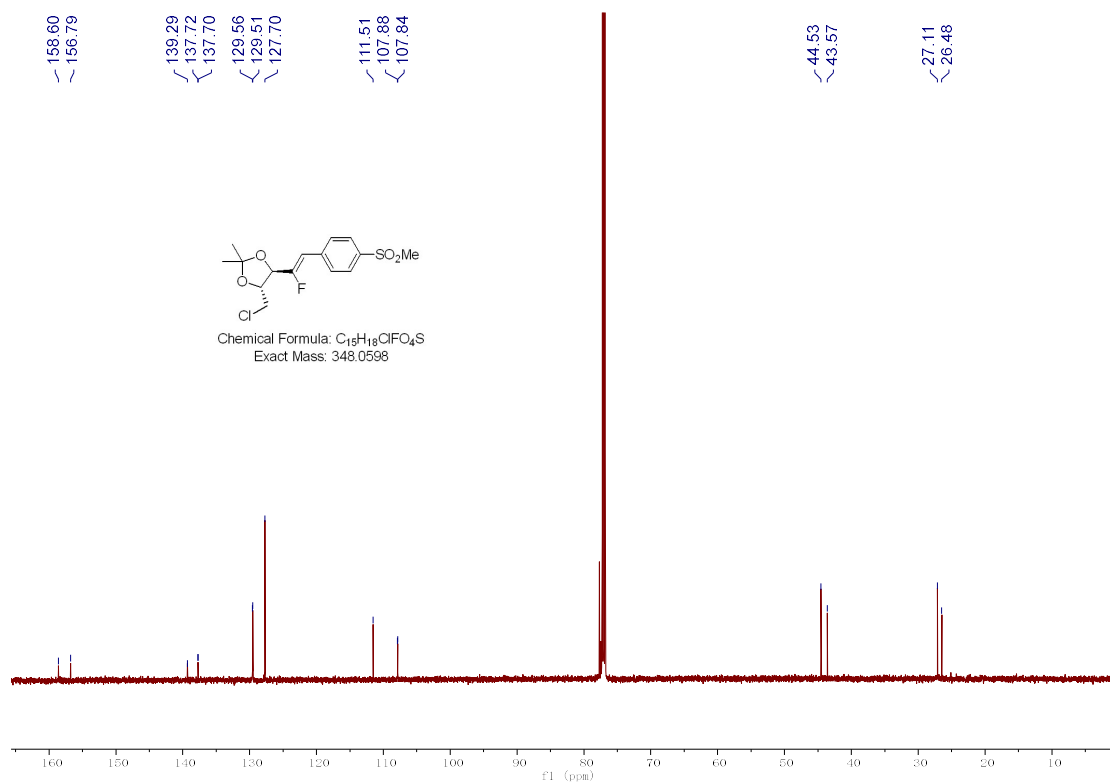

**$^{13}C$  NMR (151 MHz,  $CDCl_3$ ) Spectrum of 9aa**

-113.83  
-113.86  
-113.90  
-113.92

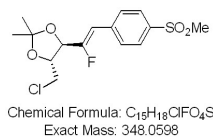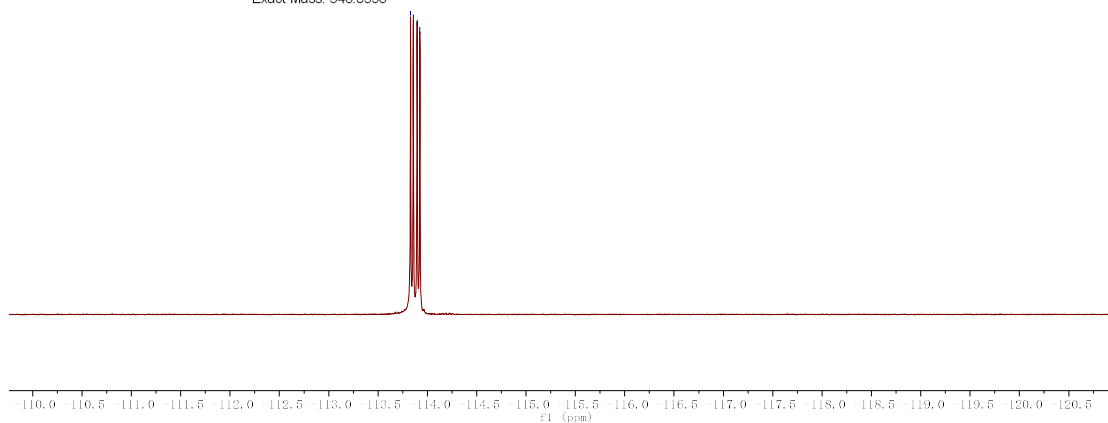

**<sup>19</sup>F NMR (565 MHz, CDCl<sub>3</sub>) Spectrum of 9aa**

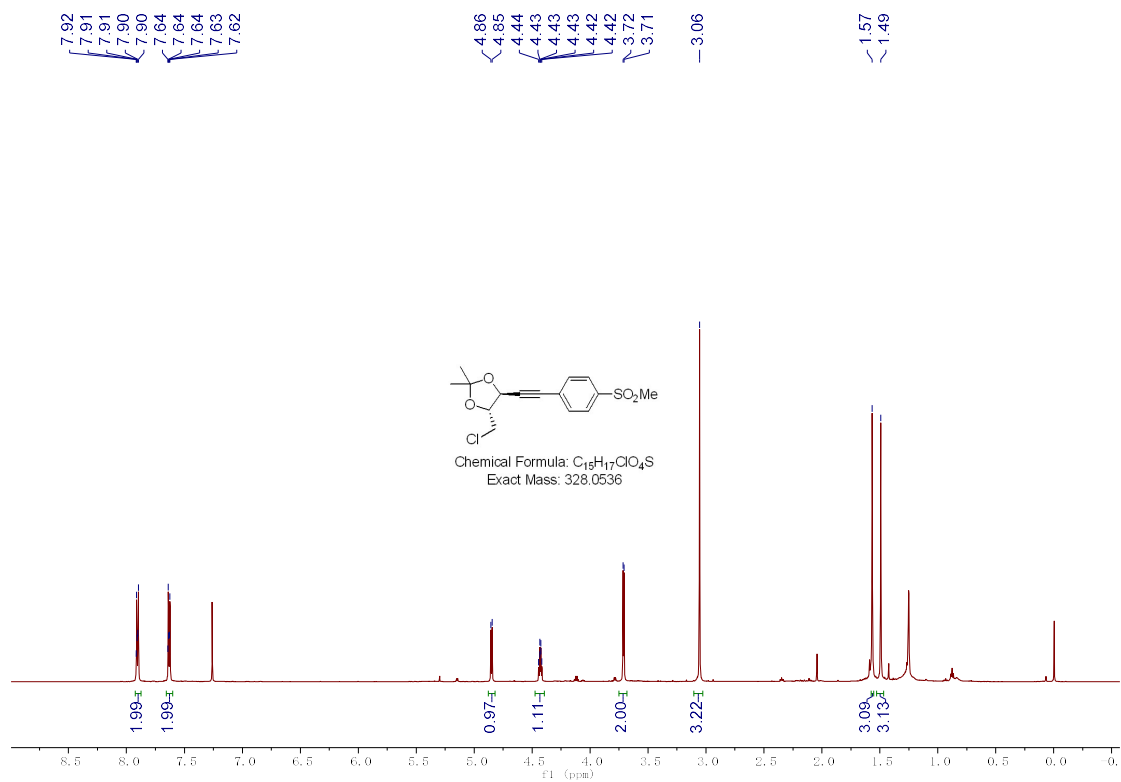

**$^1H$  NMR (600 MHz,  $CDCl_3$ ) Spectrum of 9ab**

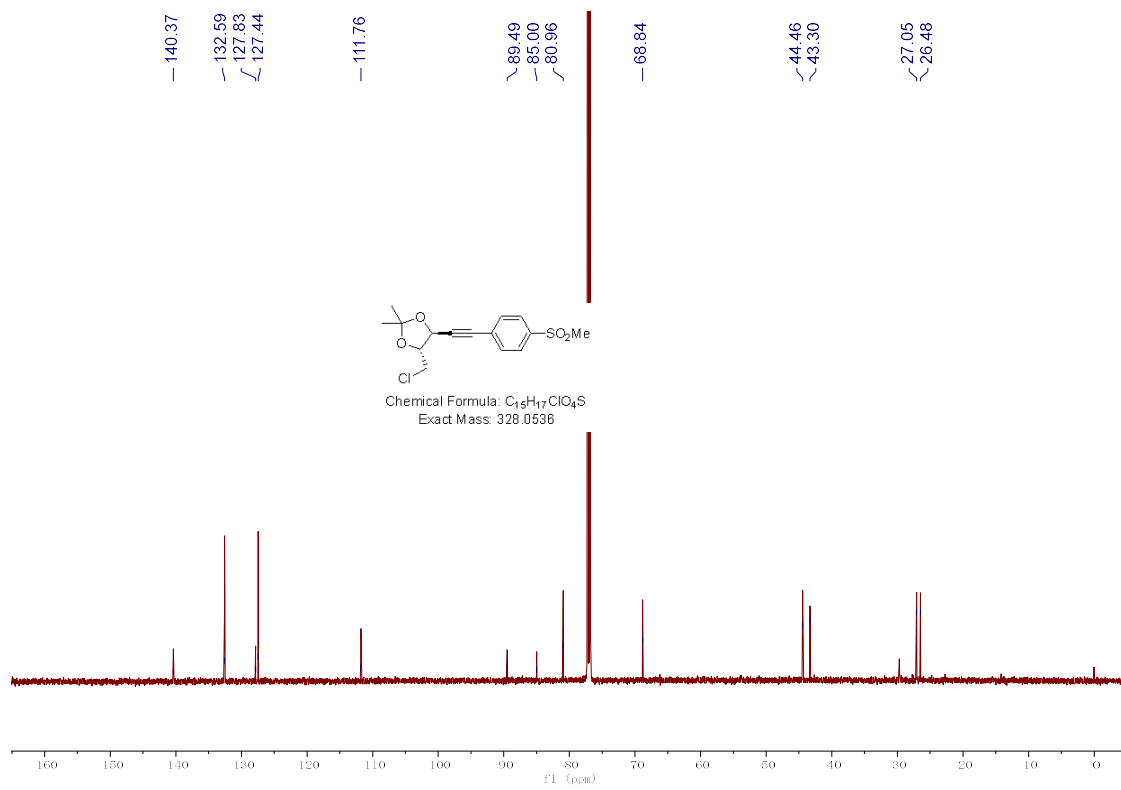

**$^{13}C$  NMR (151 MHz,  $CDCl_3$ ) Spectrum of 9ab**



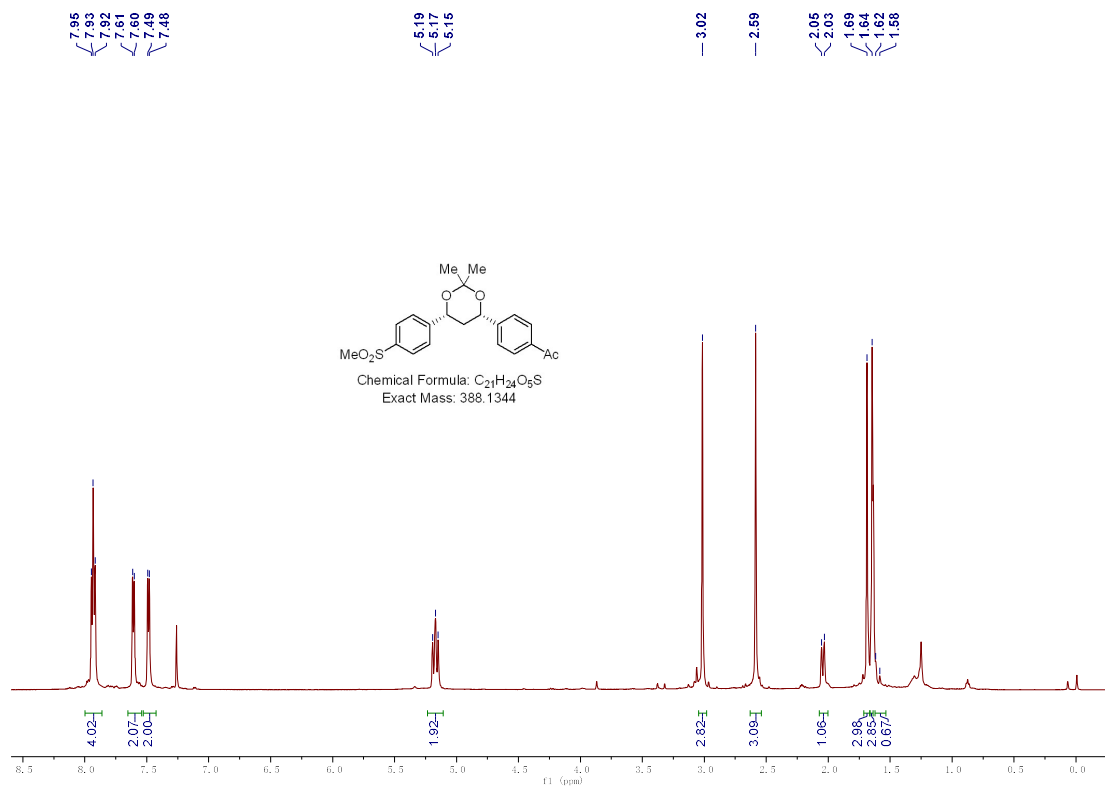

**<sup>1</sup>H NMR (600 MHz, CDCl<sub>3</sub>) Spectrum of 10a**

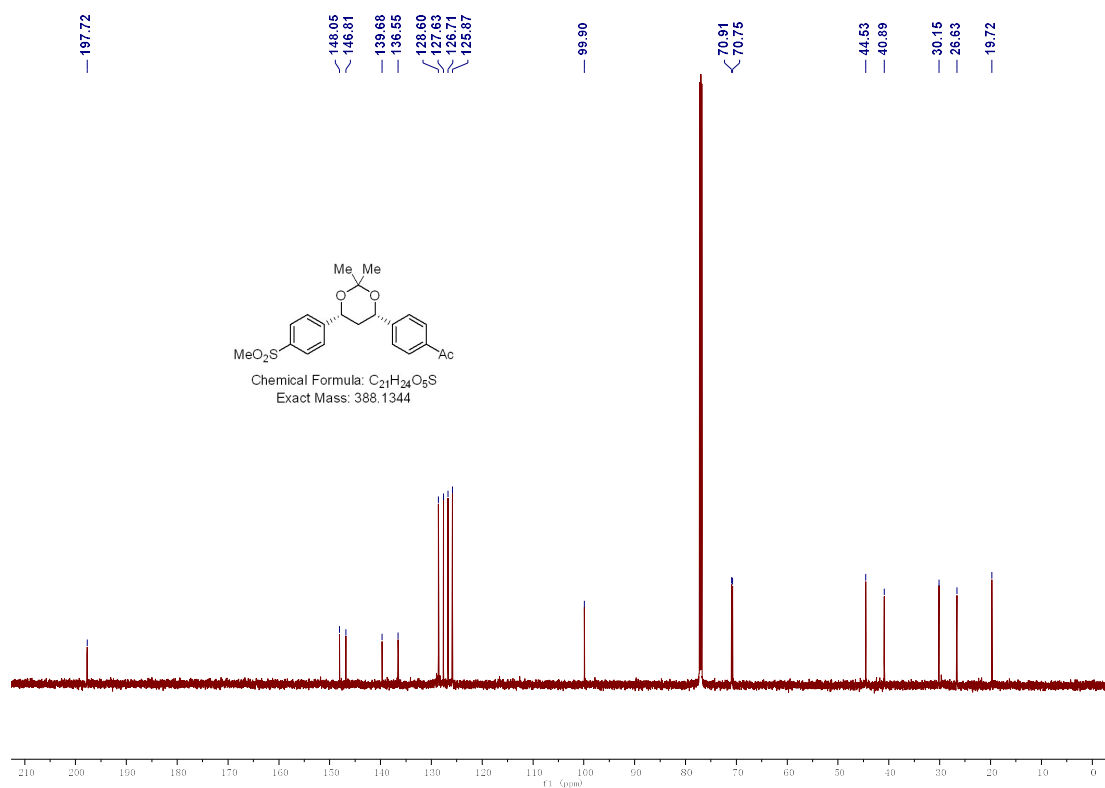

**<sup>13</sup>C NMR (151 MHz, CDCl<sub>3</sub>) Spectrum of 10a**

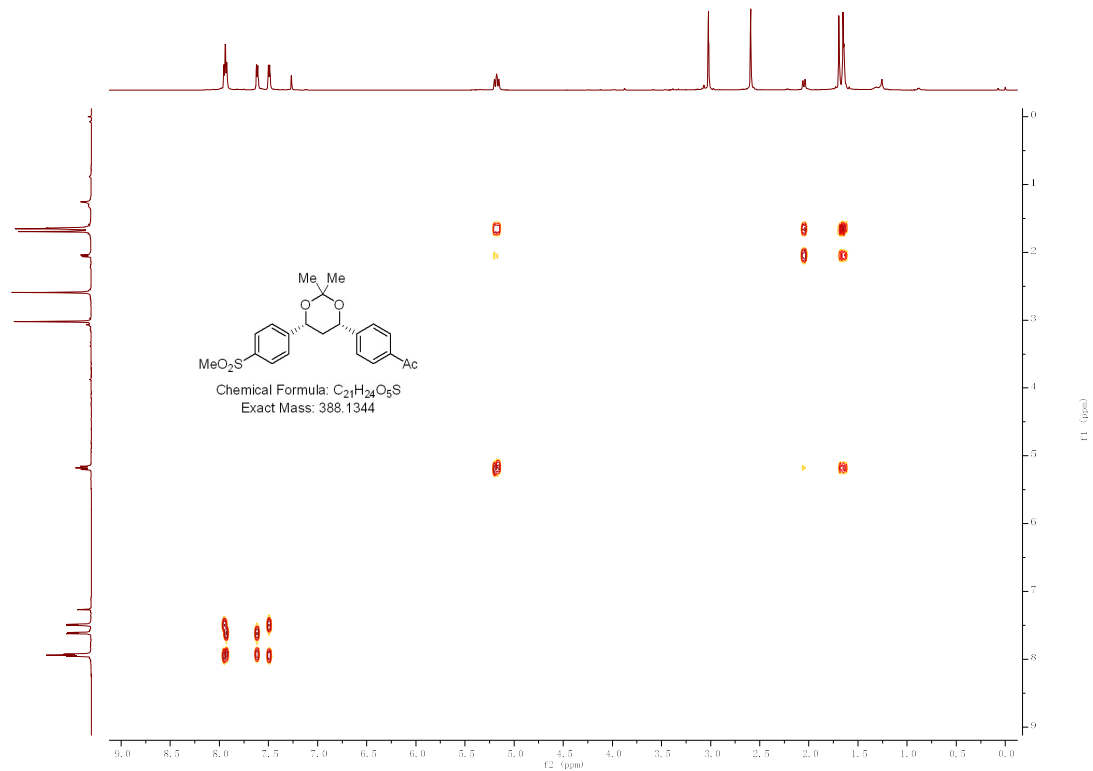

**COSY Spectrum of 10a**

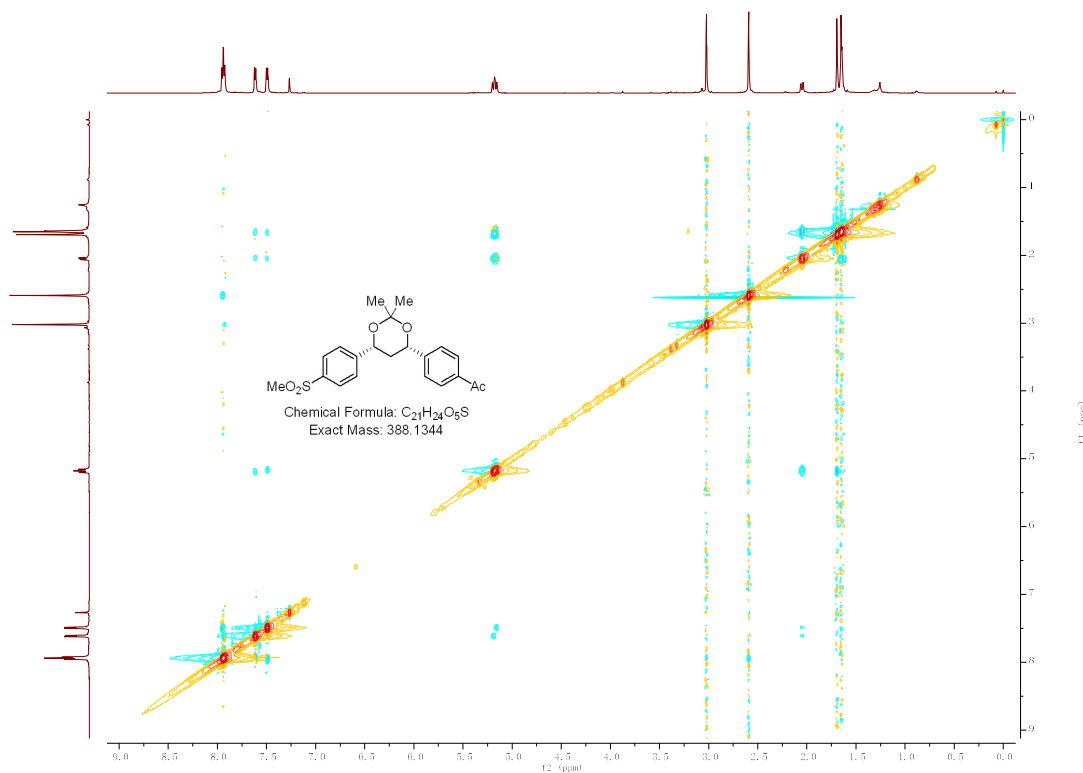

**NOE Spectrum of 10a**

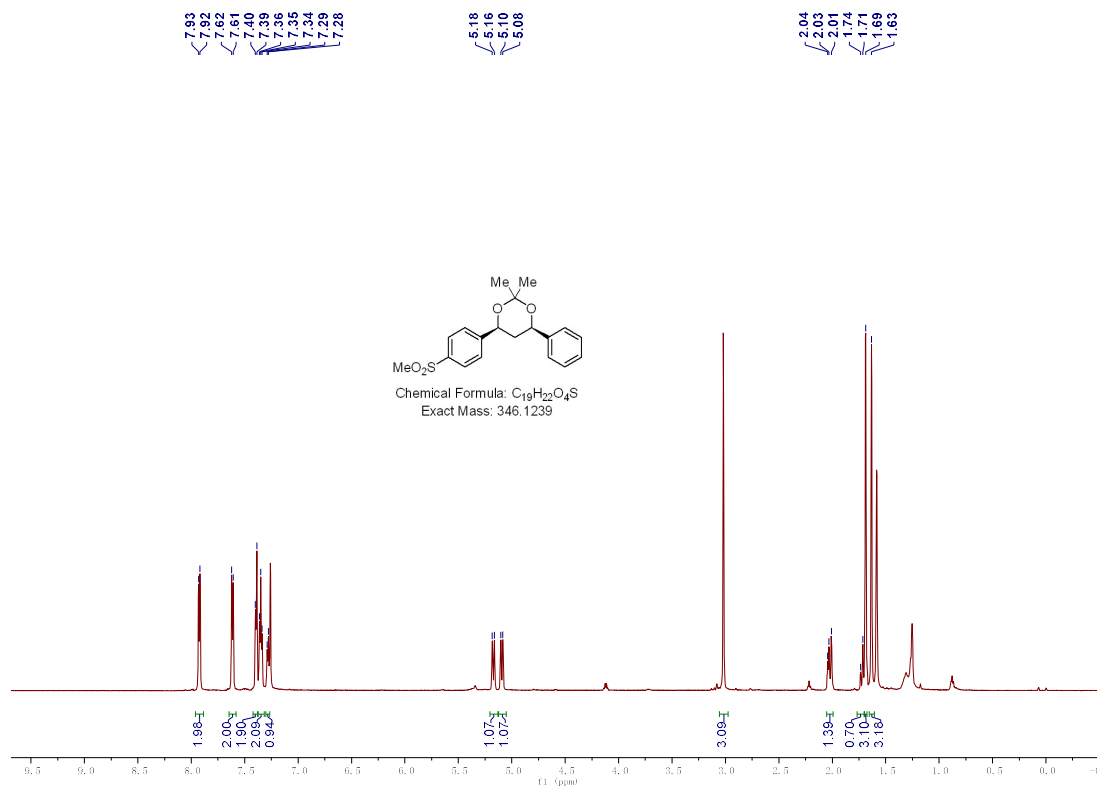

**$^1H$  NMR (600 MHz,  $CDCl_3$ ) Spectrum of 10b**

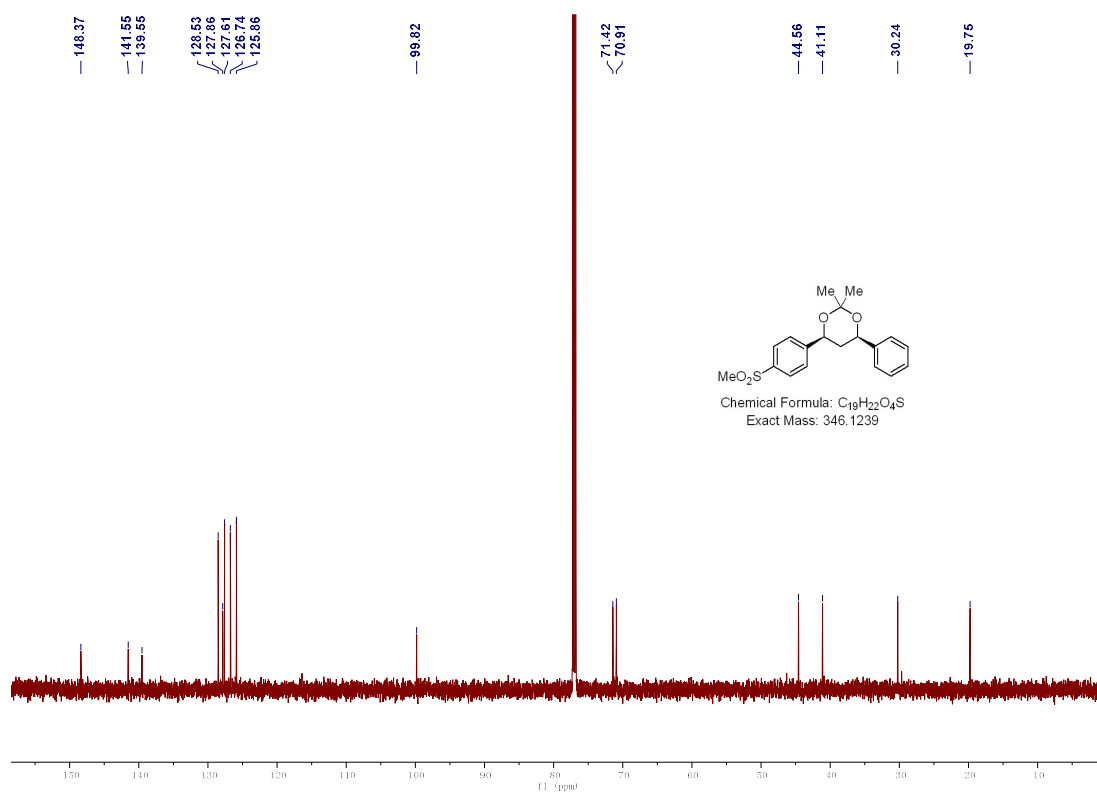

**$^{13}C$  NMR (151 MHz,  $CDCl_3$ ) Spectrum of 10b**

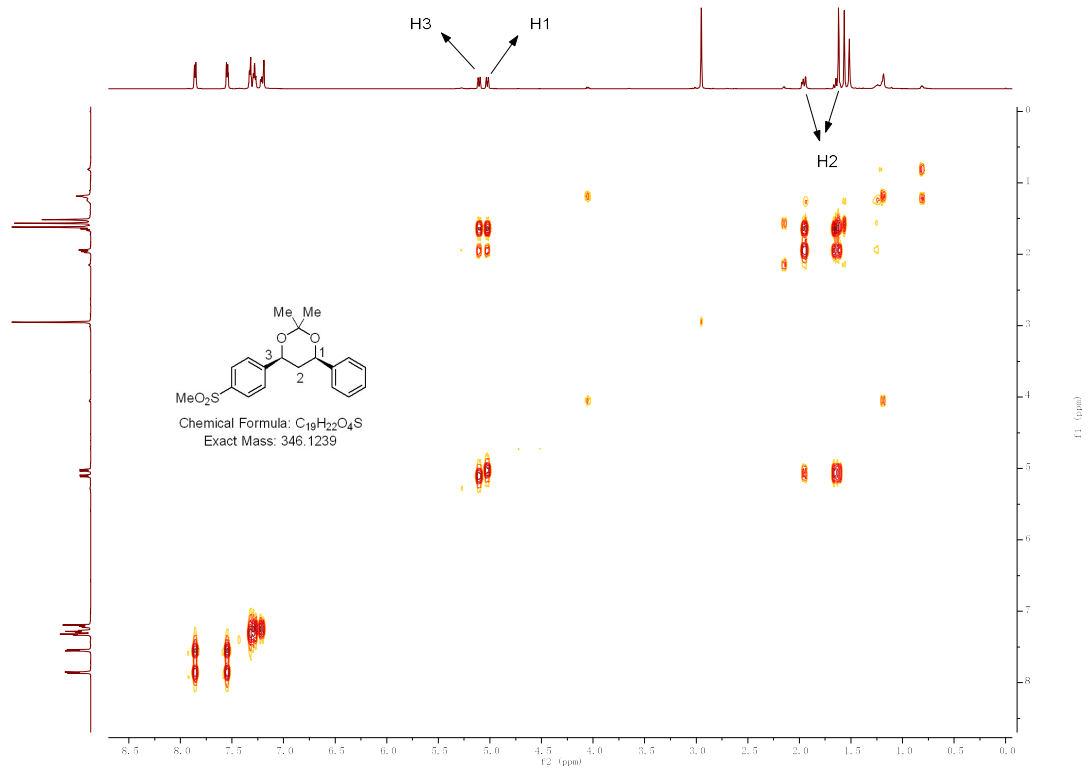

COSY Spectrum of 10b

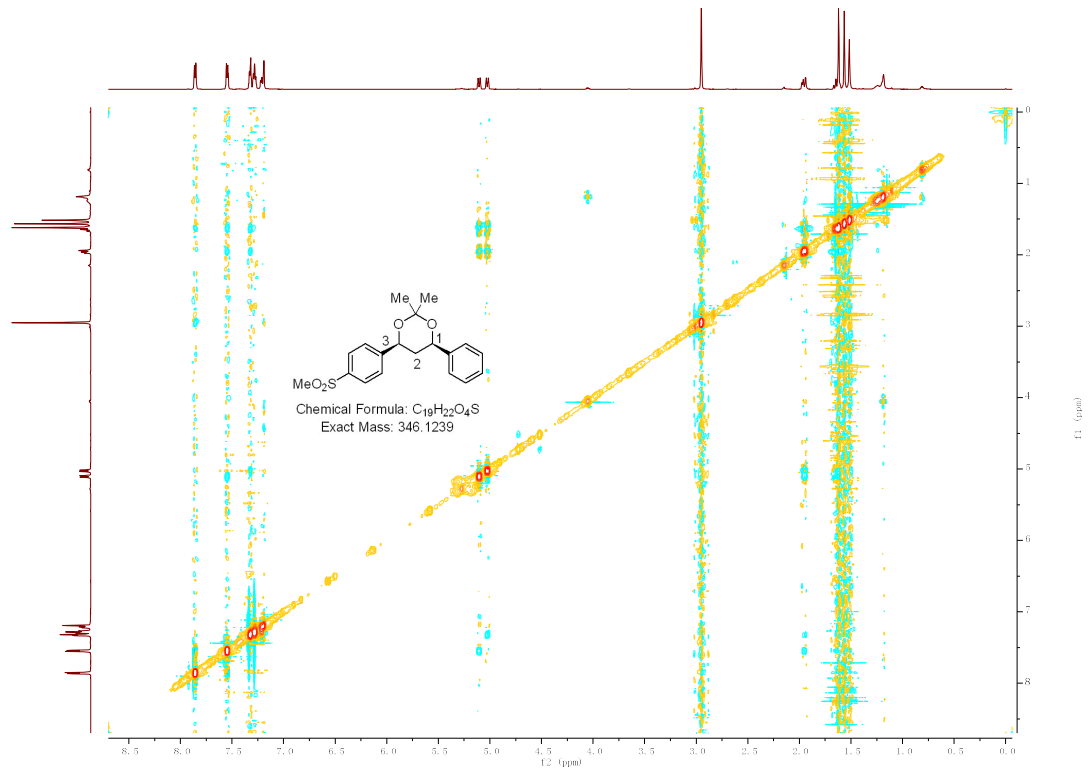

NOE Spectrum of 10b

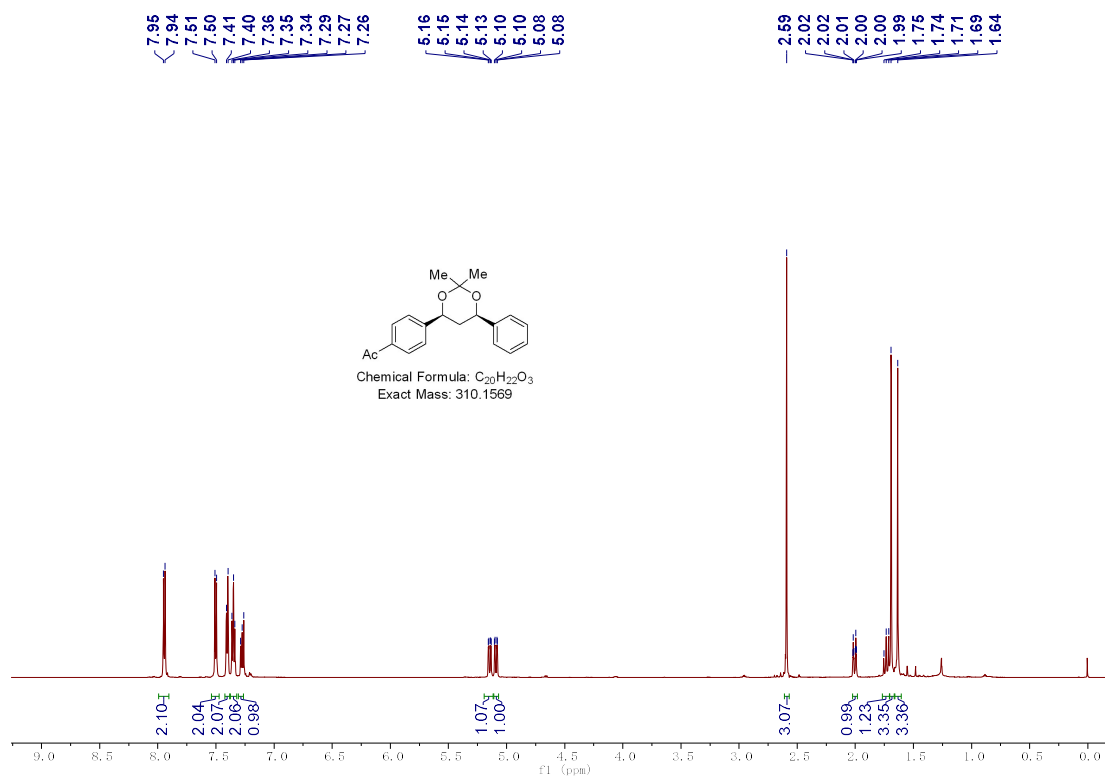

<sup>1</sup>H NMR (600 MHz, CDCl<sub>3</sub>) Spectrum of 10c

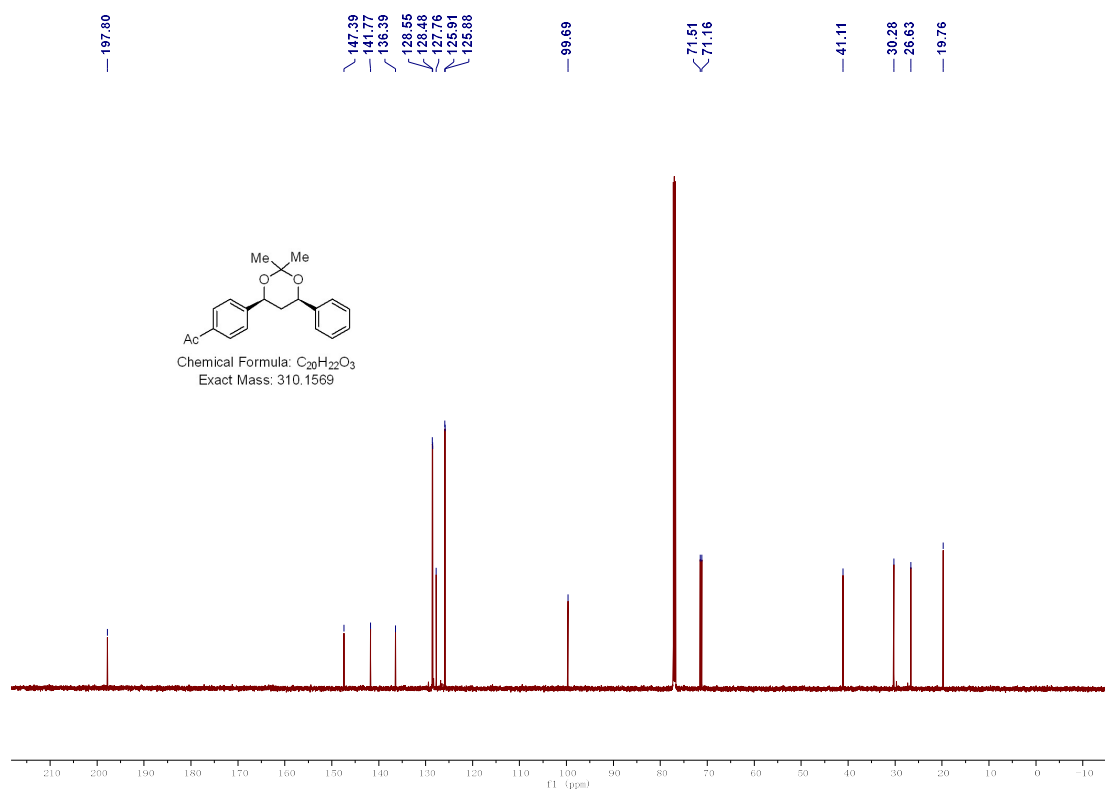

<sup>13</sup>C NMR (151 MHz, CDCl<sub>3</sub>) Spectrum of 10c

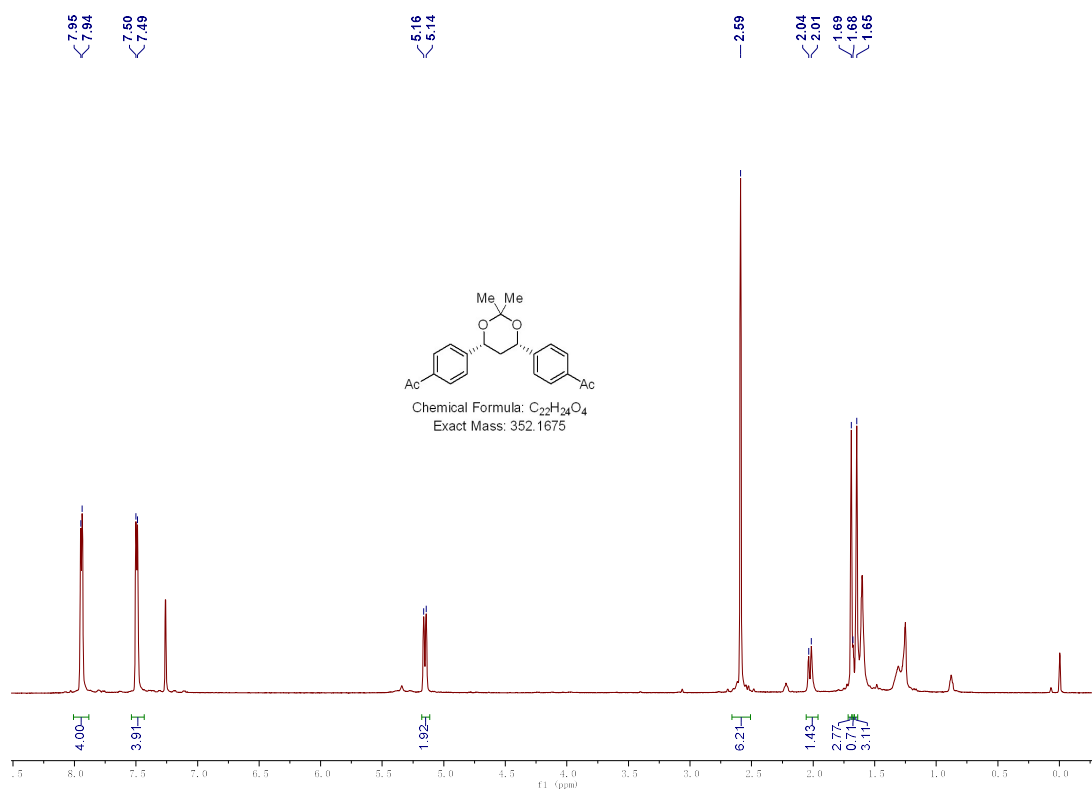

**<sup>1</sup>H NMR (600 MHz, CDCl<sub>3</sub>) Spectrum of 10d**

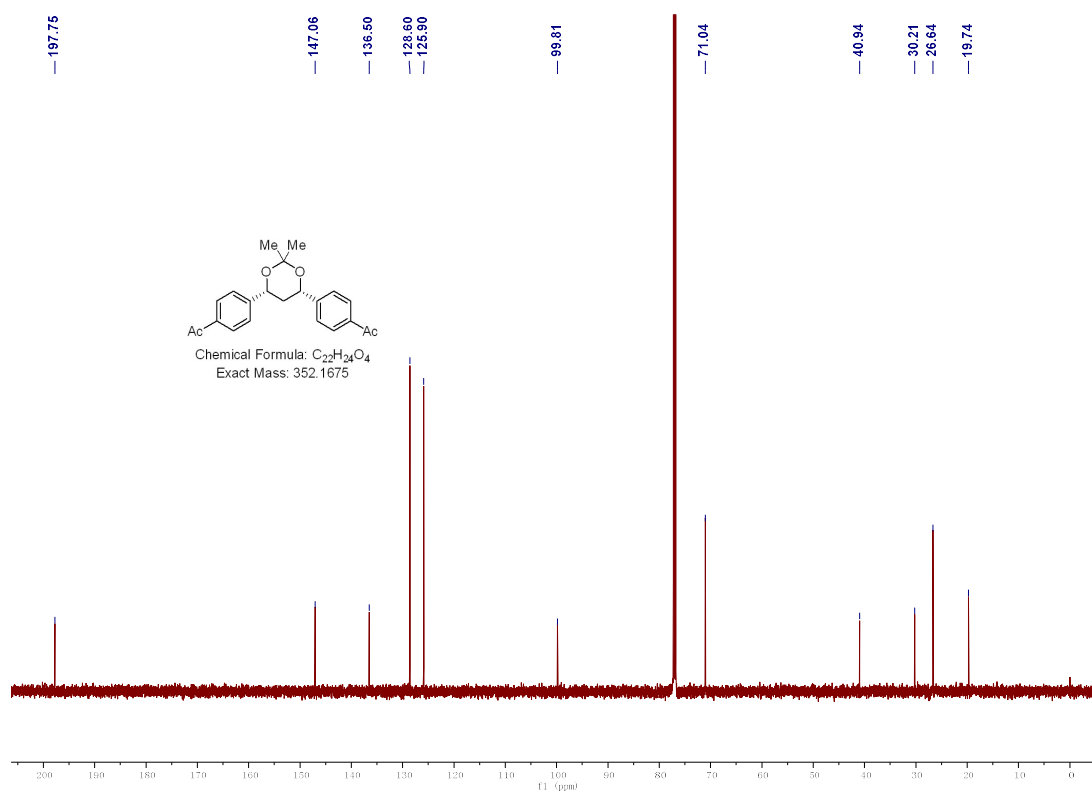

**<sup>13</sup>C NMR (151 MHz, CDCl<sub>3</sub>) Spectrum of 10d**

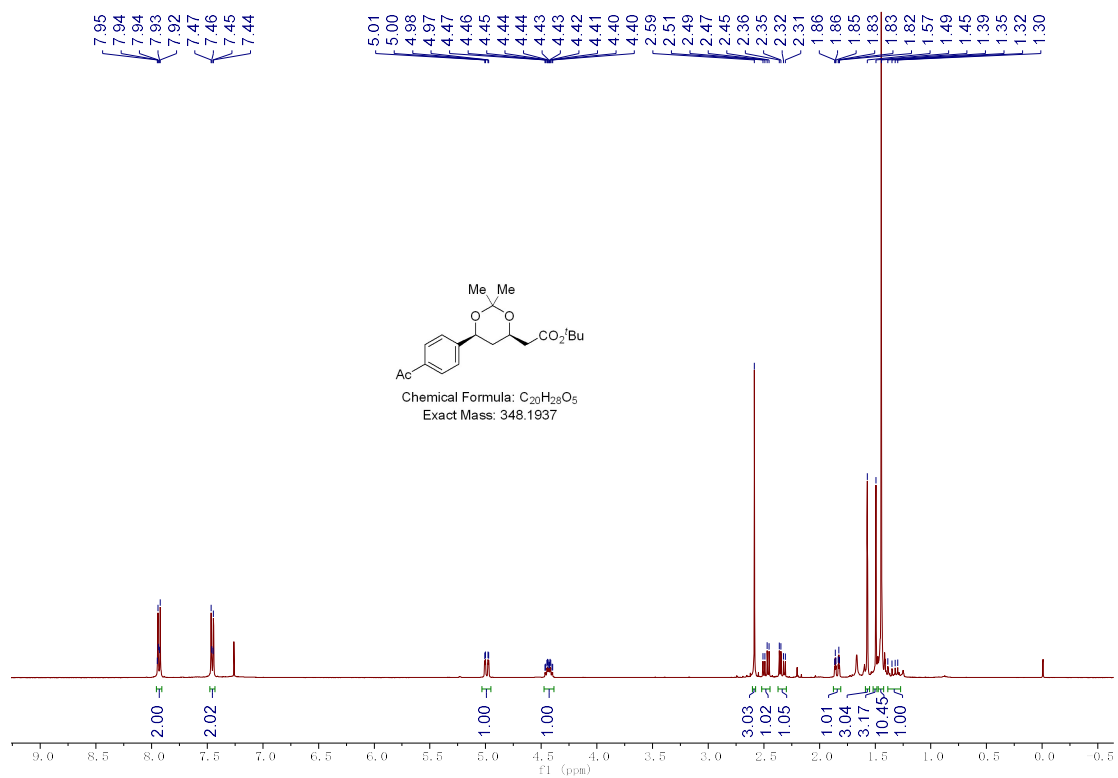

**<sup>1</sup>H NMR (400 MHz, CDCl<sub>3</sub>) Spectrum of 10e**

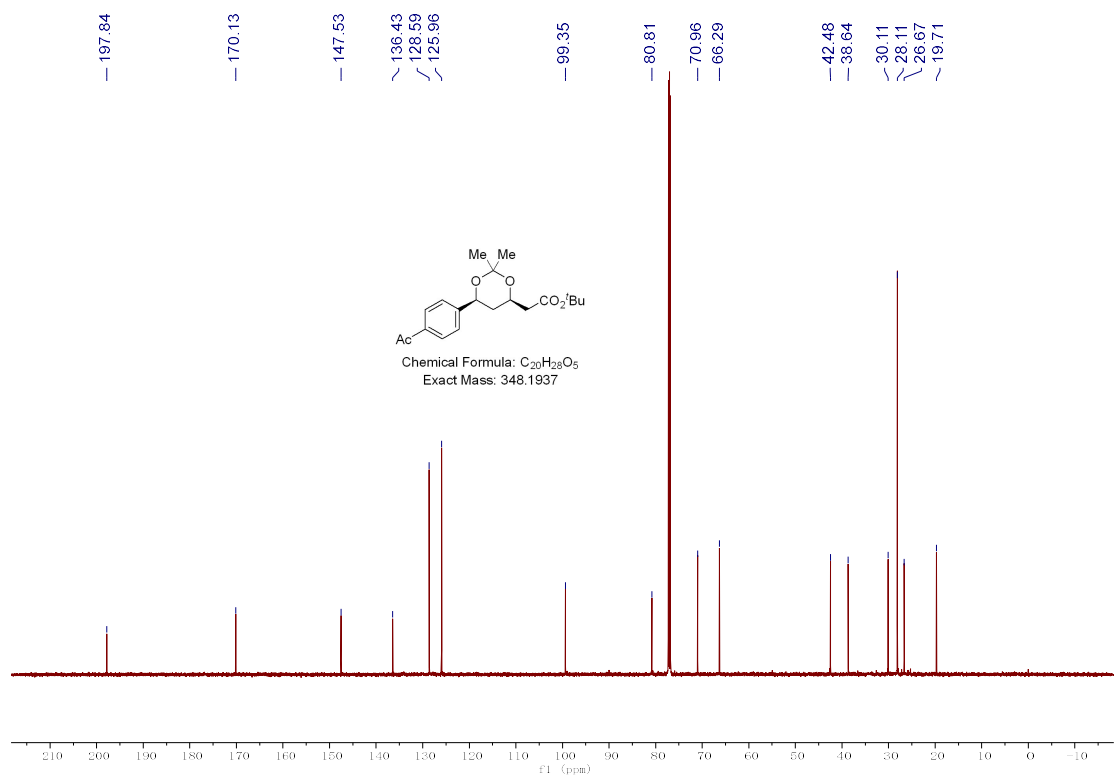

**<sup>13</sup>C NMR (151 MHz, CDCl<sub>3</sub>) Spectrum of 10e**

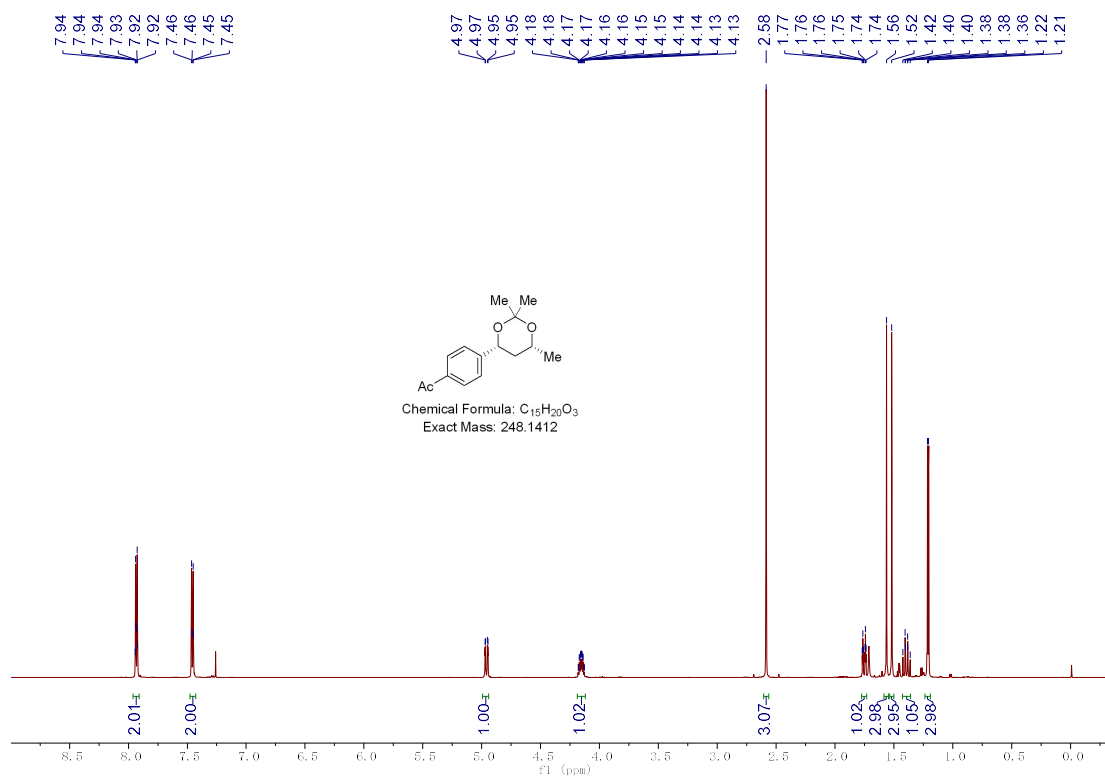

**<sup>1</sup>H NMR (600 MHz, CDCl<sub>3</sub>) Spectrum of 10f**

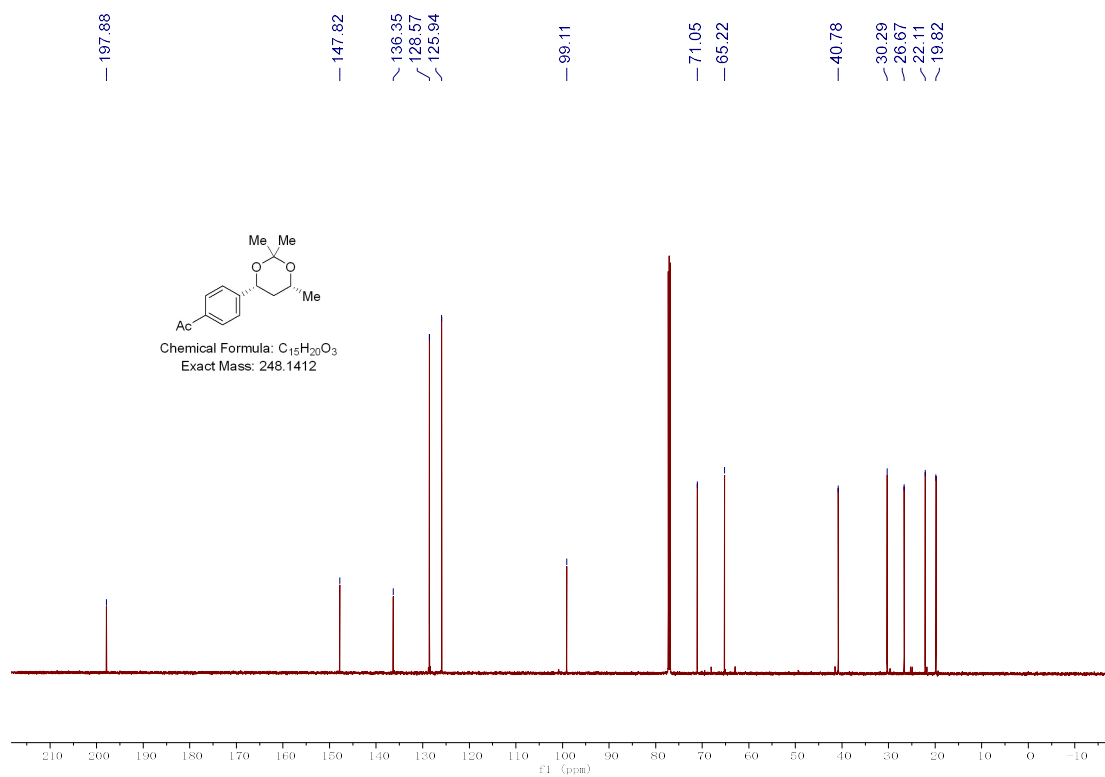

**<sup>13</sup>C NMR (151 MHz, CDCl<sub>3</sub>) Spectrum of 10f**



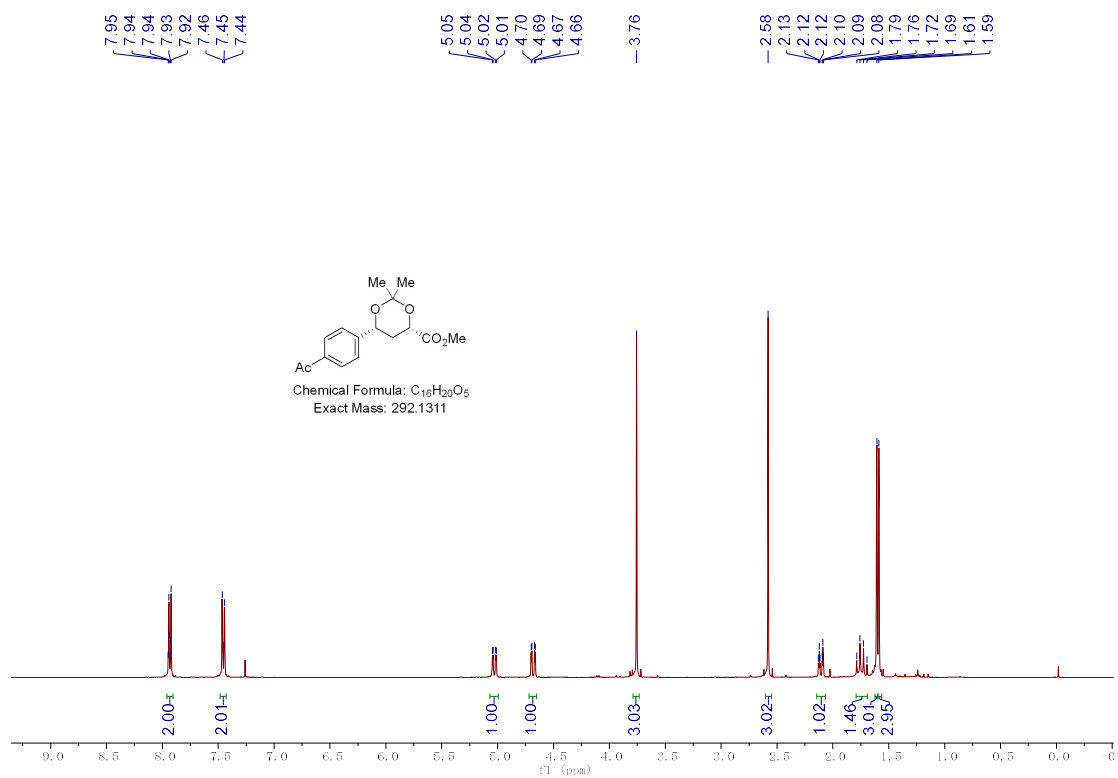

<sup>1</sup>H NMR (400 MHz, CDCl<sub>3</sub>) Spectrum of 10g

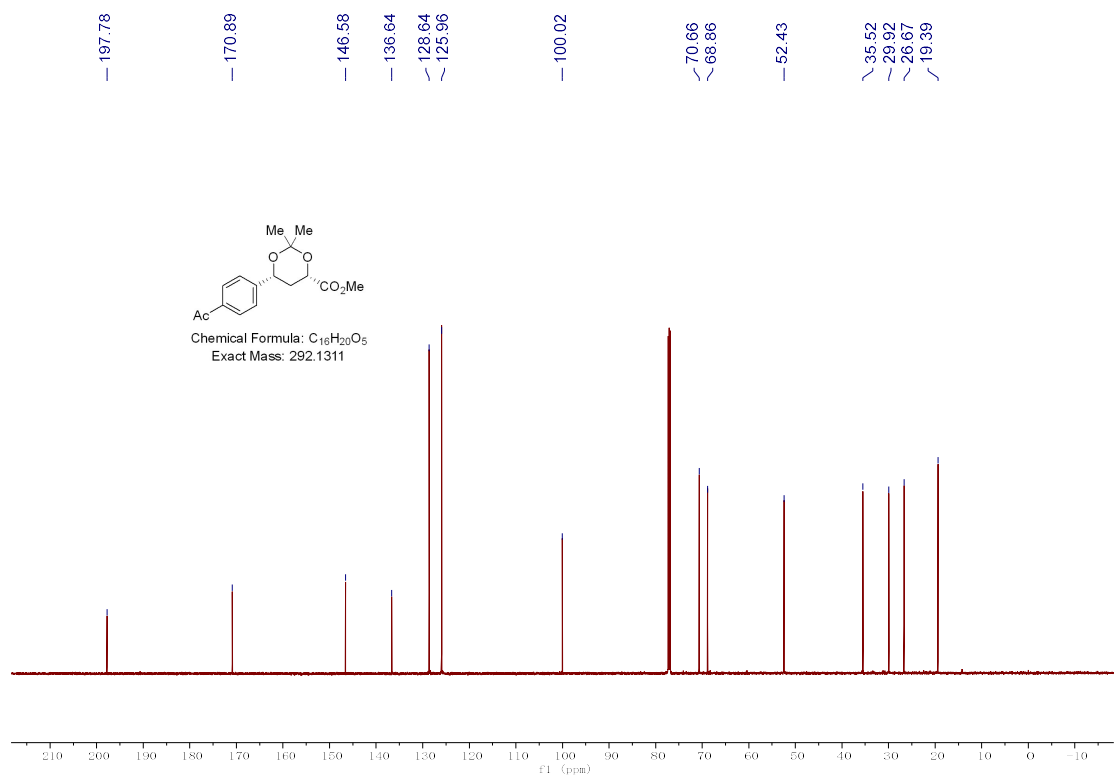

<sup>13</sup>C NMR (151 MHz, CDCl<sub>3</sub>) Spectrum of 10g

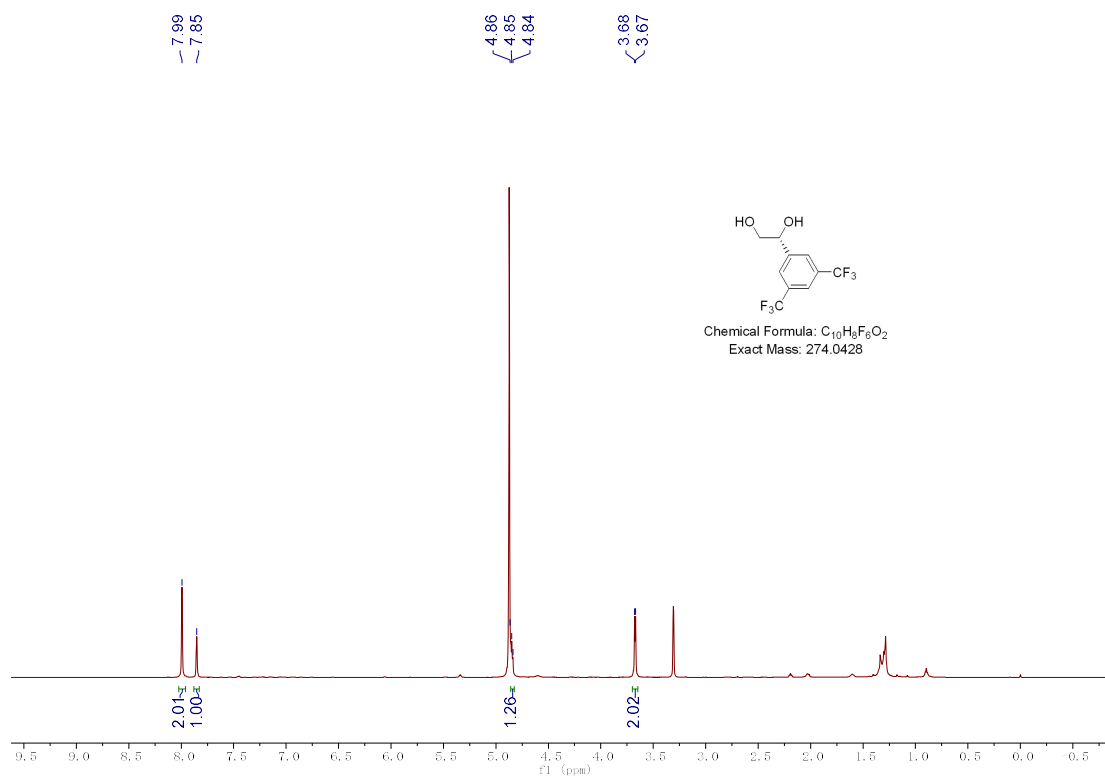

**$^1H$  NMR (600 MHz,  $CD_3OD$ ) Spectrum of 14**

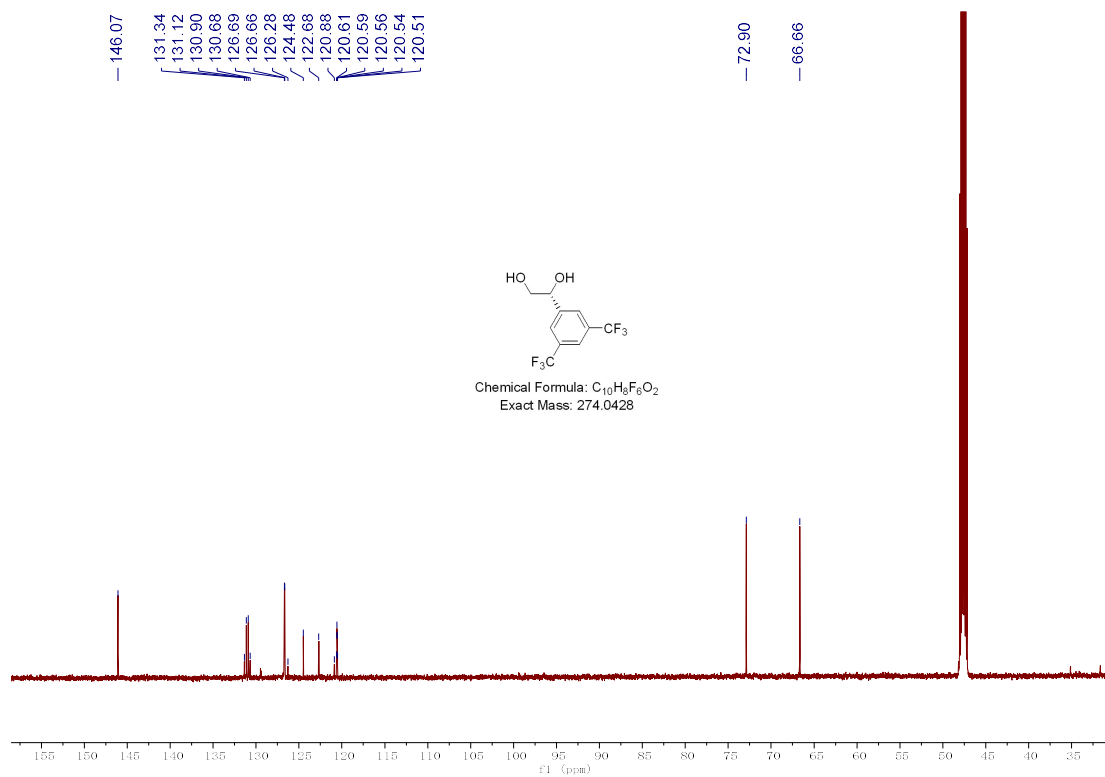

**$^{13}C$  NMR (151 MHz,  $CD_3OD$ ) Spectrum of 14**

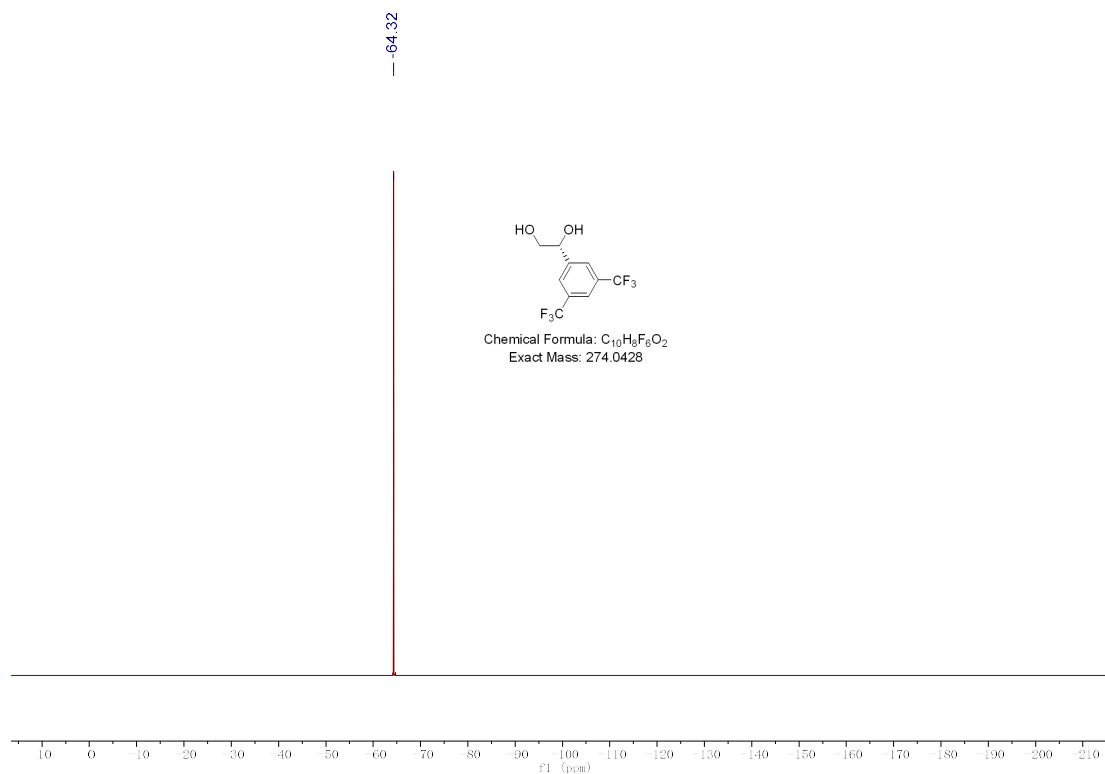

**$^{19}\text{F}$  NMR (565 MHz,  $\text{CD}_3\text{OD}$ ) Spectrum of 14**

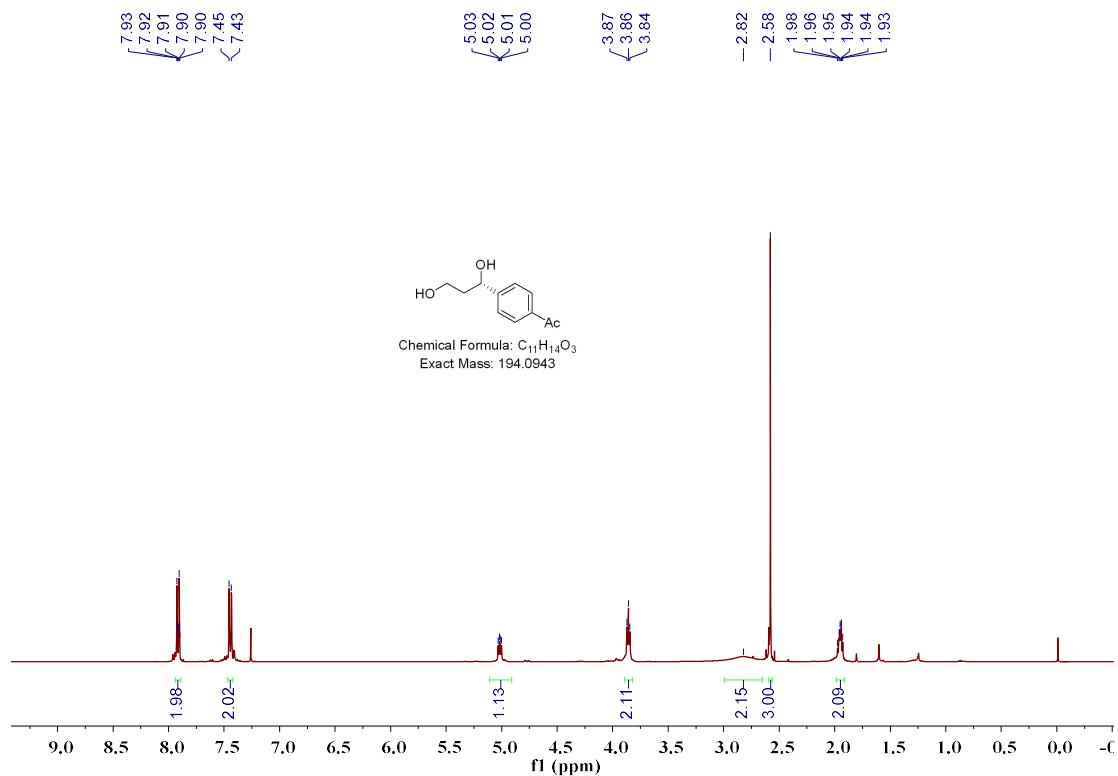

**<sup>1</sup>H NMR (400 MHz, CDCl<sub>3</sub>) Spectrum of 15**

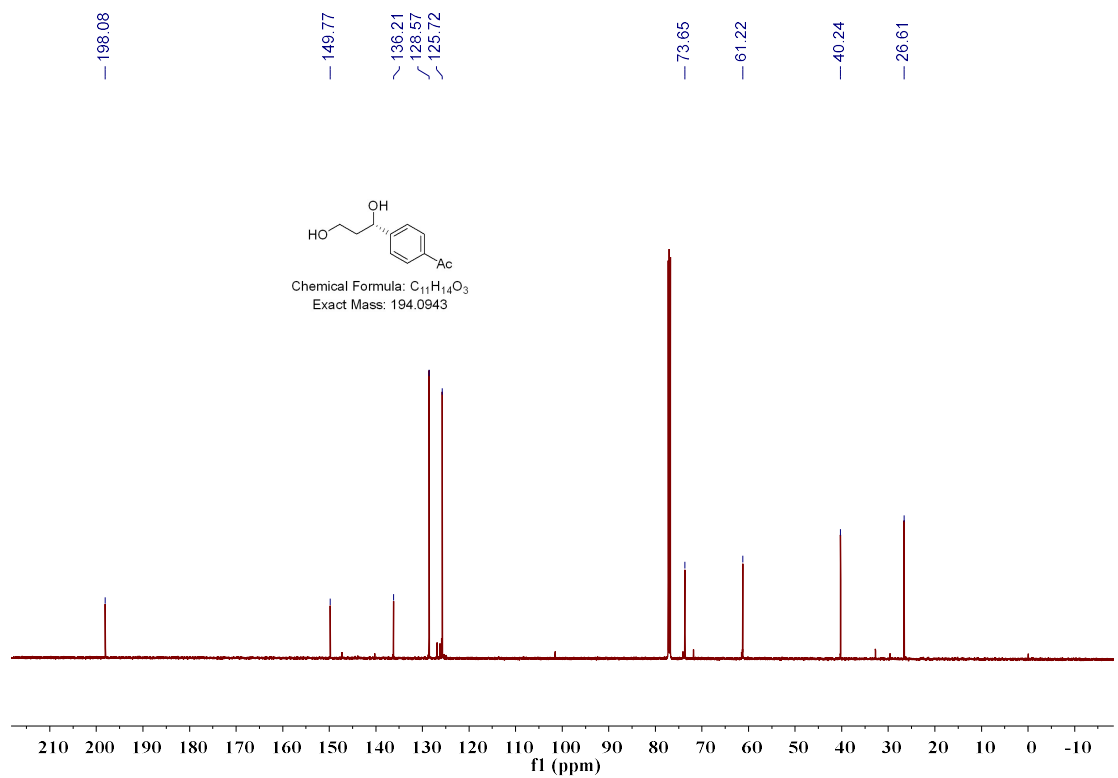

**<sup>13</sup>C NMR (151 MHz, CDCl<sub>3</sub>) Spectrum of 15**

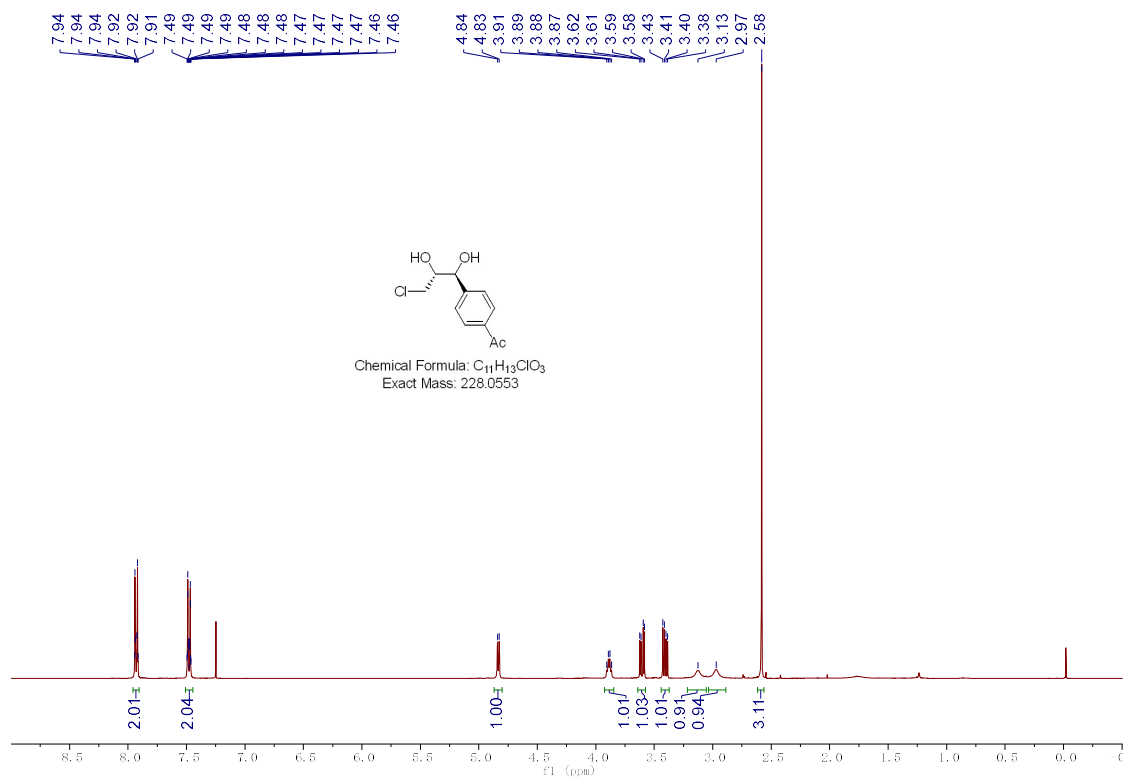

**<sup>1</sup>H NMR (400 MHz, CDCl<sub>3</sub>) Spectrum of 16**

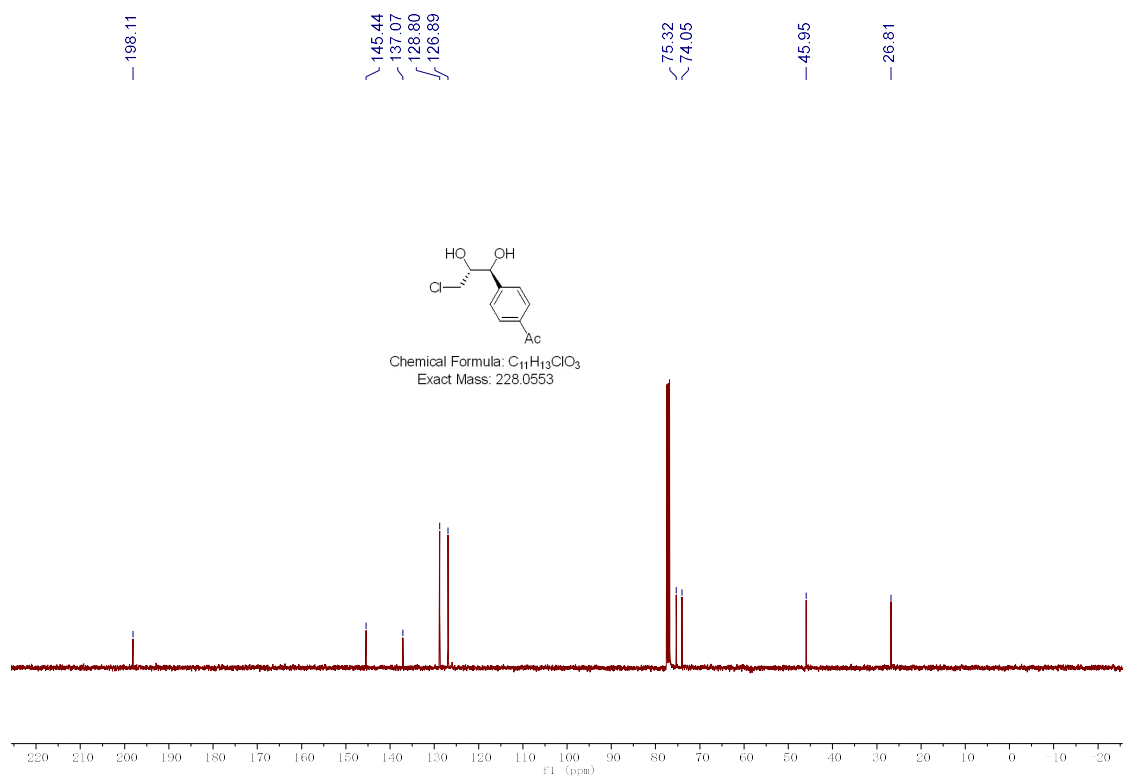

**<sup>13</sup>C NMR (101 MHz, CDCl<sub>3</sub>) Spectrum of 16**

### (*R*)-Carisbamate

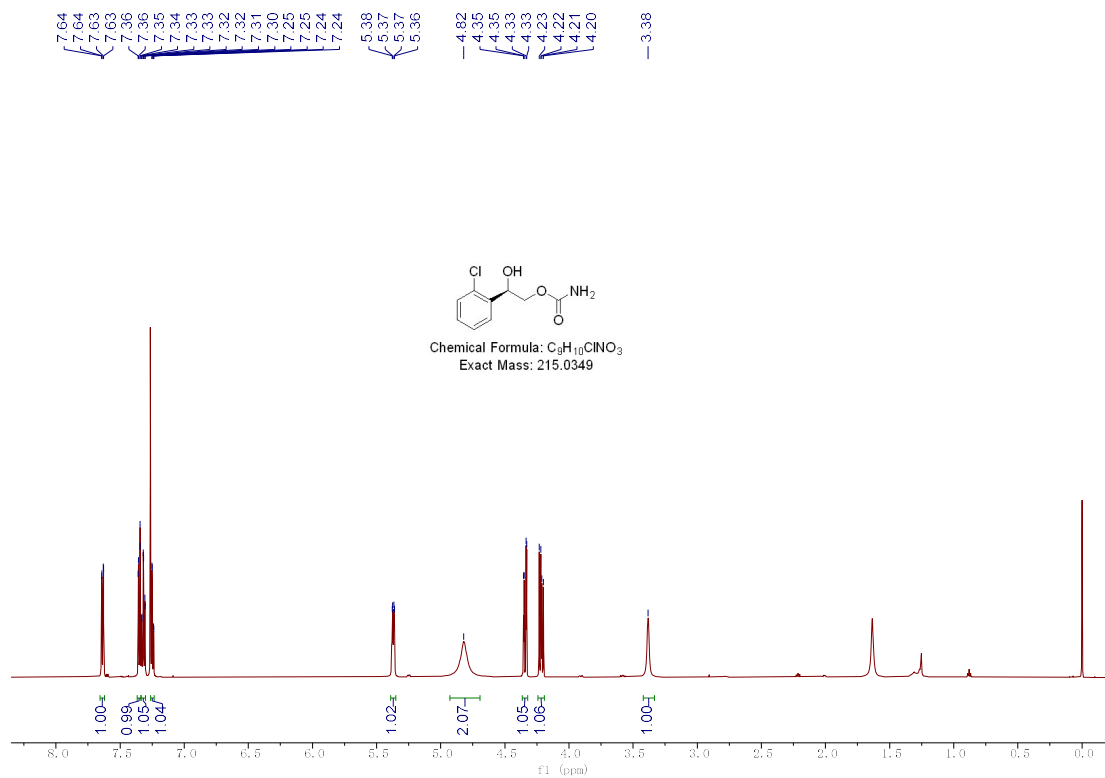

<sup>1</sup>H NMR (600 MHz, CDCl<sub>3</sub>) Spectrum of (*R*)-Carisbamate

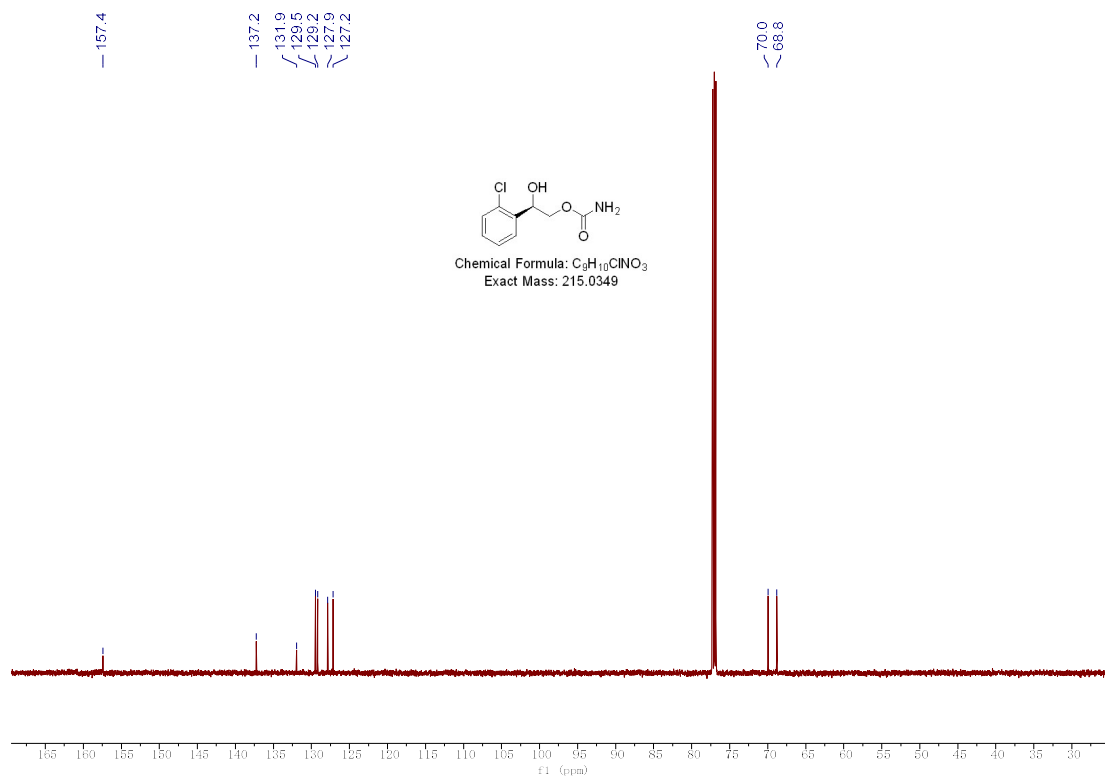

<sup>13</sup>C NMR (151 MHz, CDCl<sub>3</sub>) Spectrum of (*R*)-Carisbamate

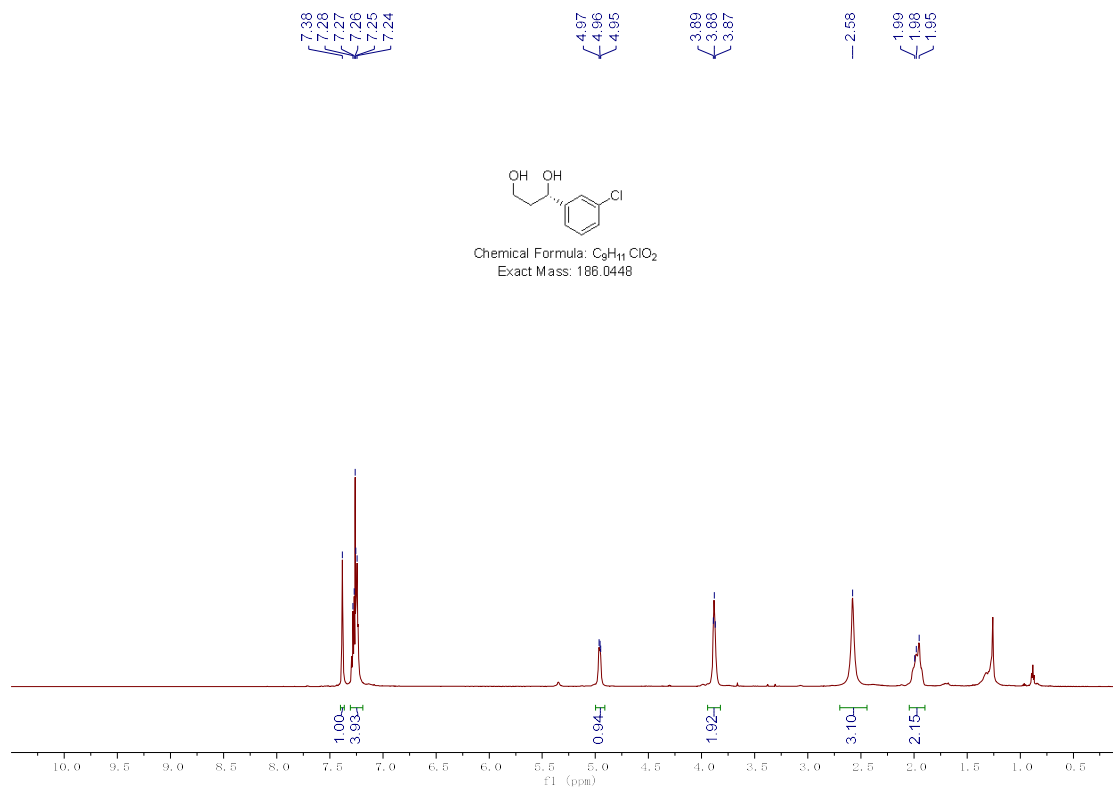

**<sup>1</sup>H NMR (600 MHz, CDCl<sub>3</sub>) Spectrum of 17**

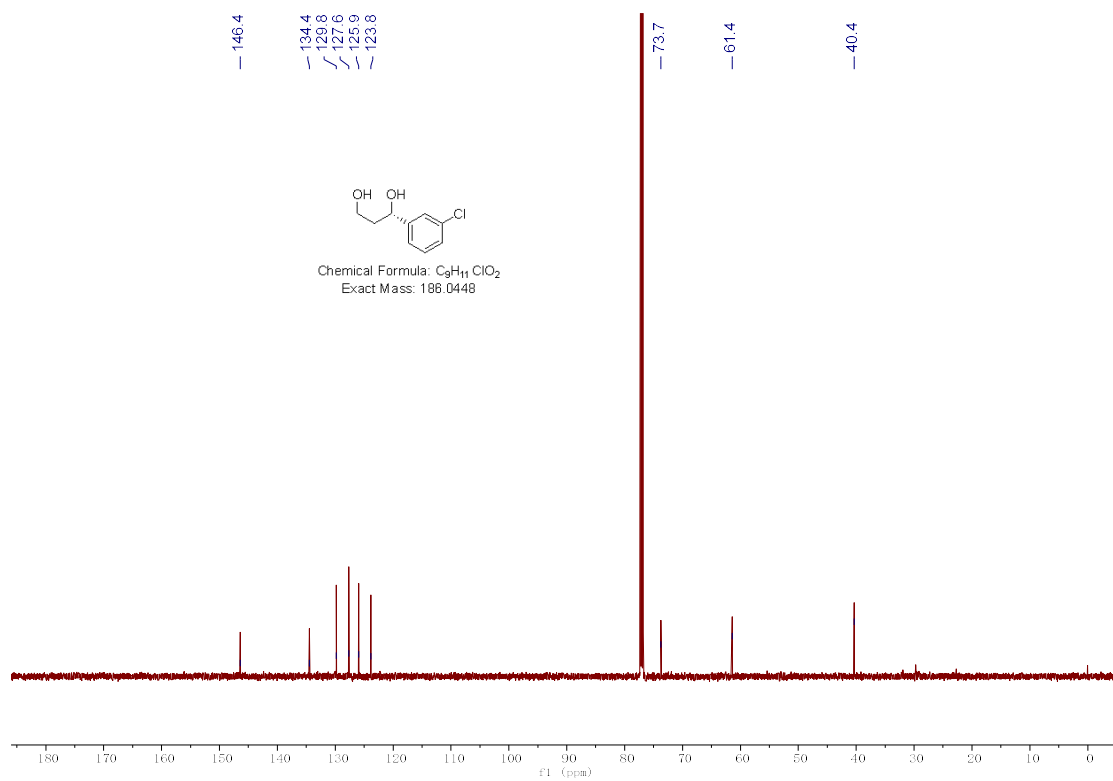

**<sup>13</sup>C NMR (151 MHz, CDCl<sub>3</sub>) Spectrum of 17**

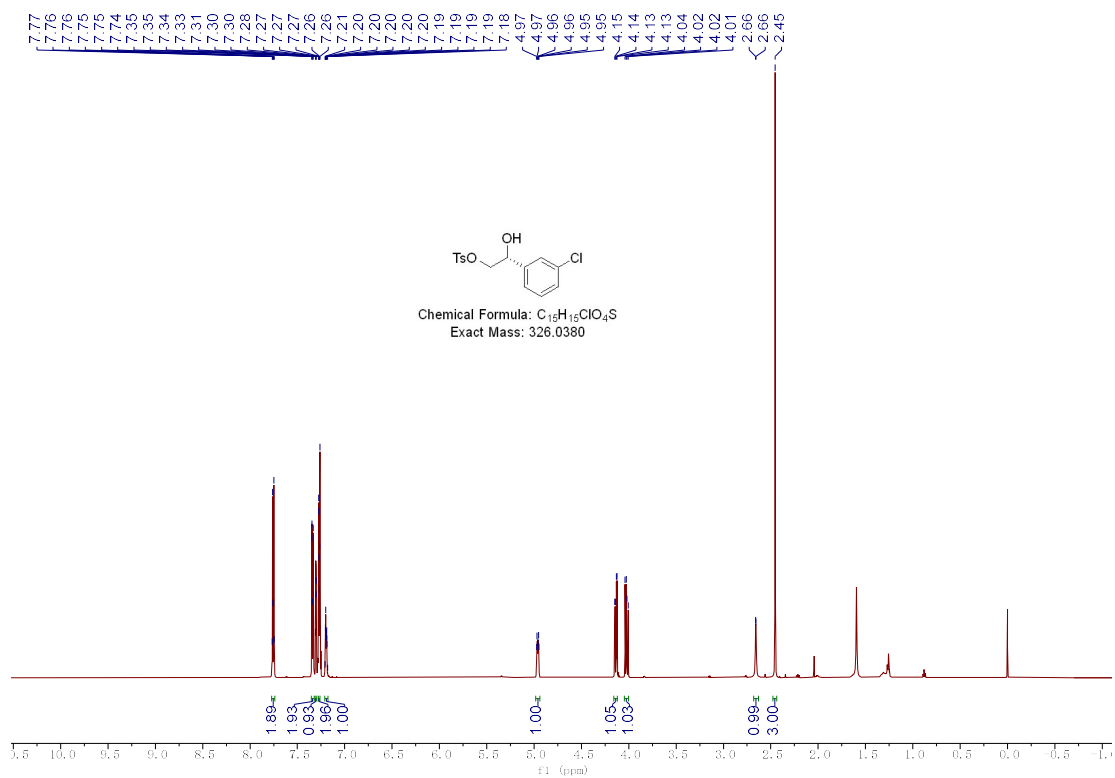

**<sup>1</sup>H NMR (600 MHz, CDCl<sub>3</sub>) Spectrum of 18**

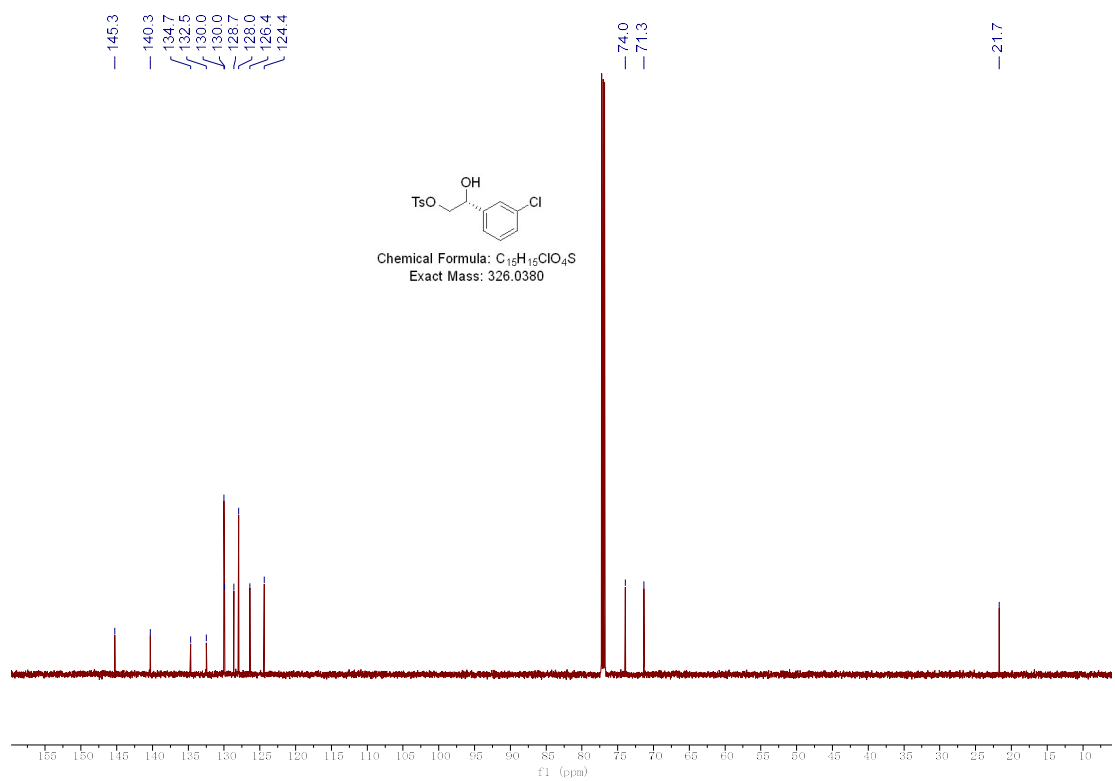

**<sup>13</sup>C NMR (151 MHz, CDCl<sub>3</sub>) Spectrum of 18**



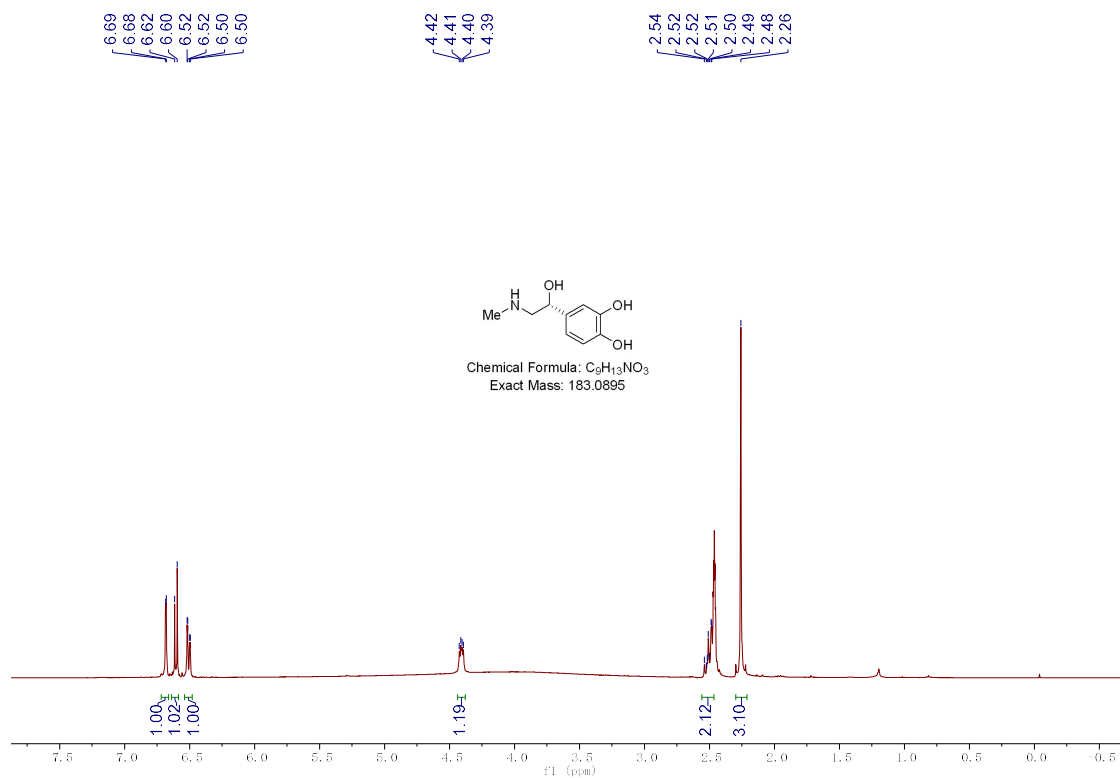

**$^1\text{H}$  NMR (400 MHz,  $\text{DMSO-}d_6$ ) Spectrum of (-)-Epinephrine**

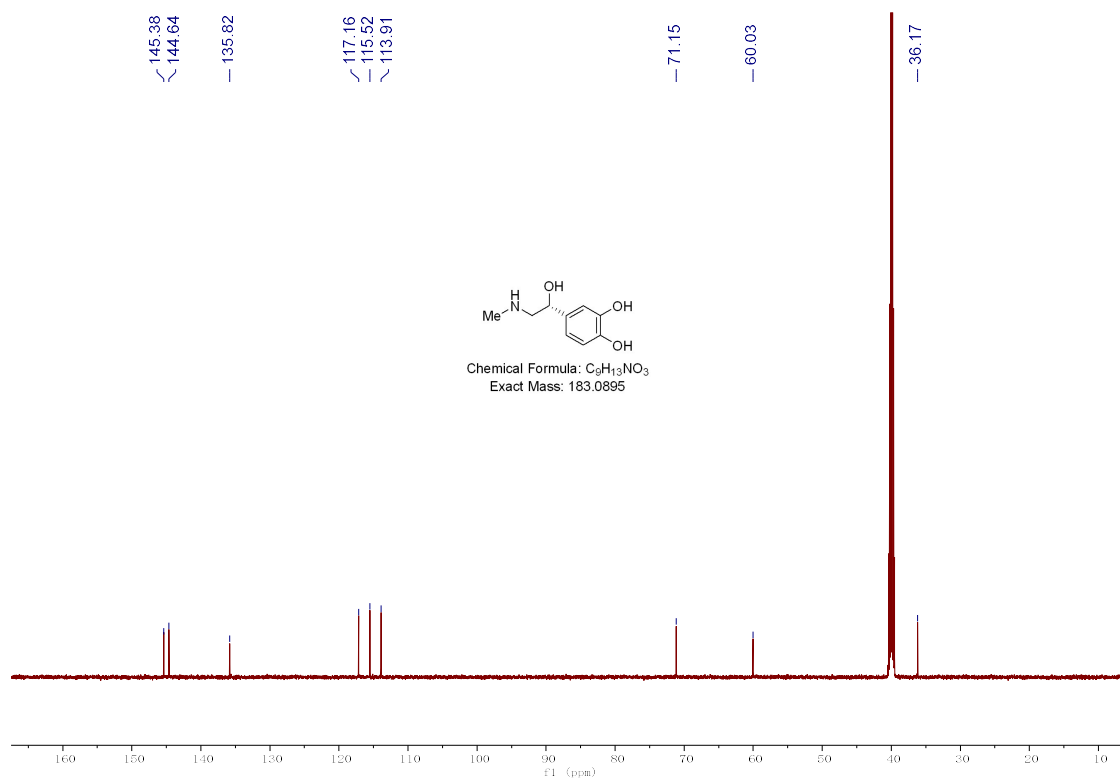

**$^{13}\text{C}$  NMR (151 MHz,  $\text{DMSO-}d_6$ ) Spectrum of (-)-Epinephrine**

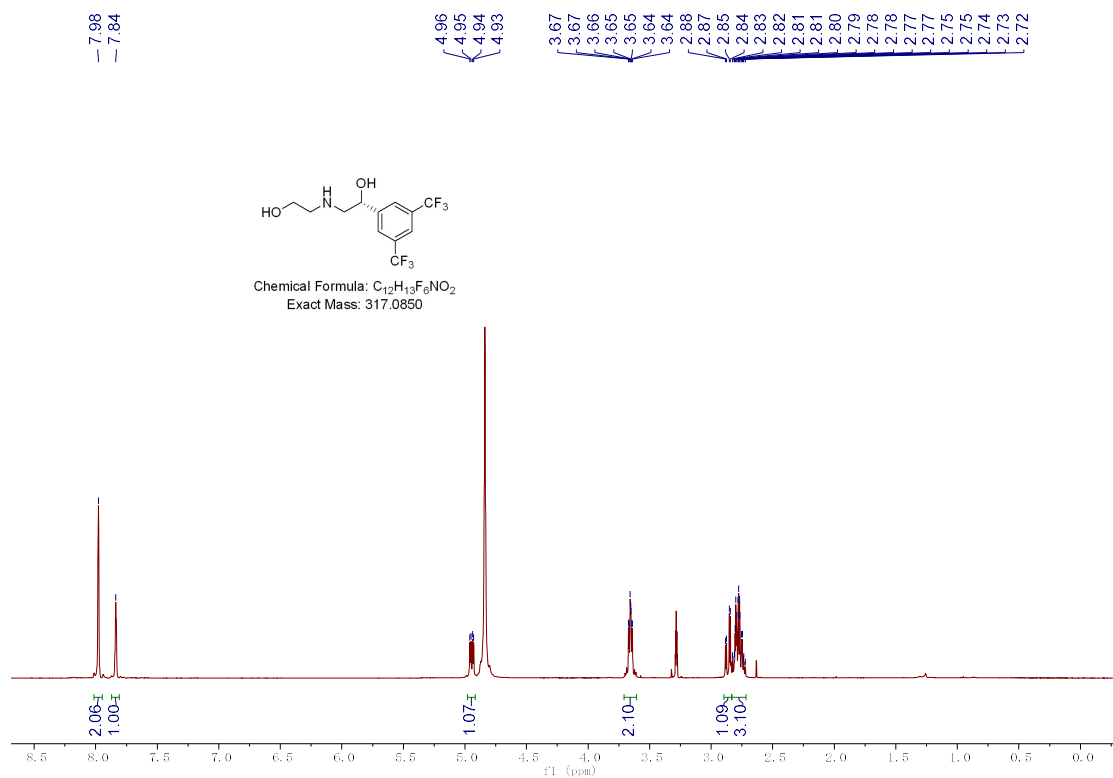

**$^1H$  NMR (400 MHz, Methanol- $d_4$ ) Spectrum of 20**

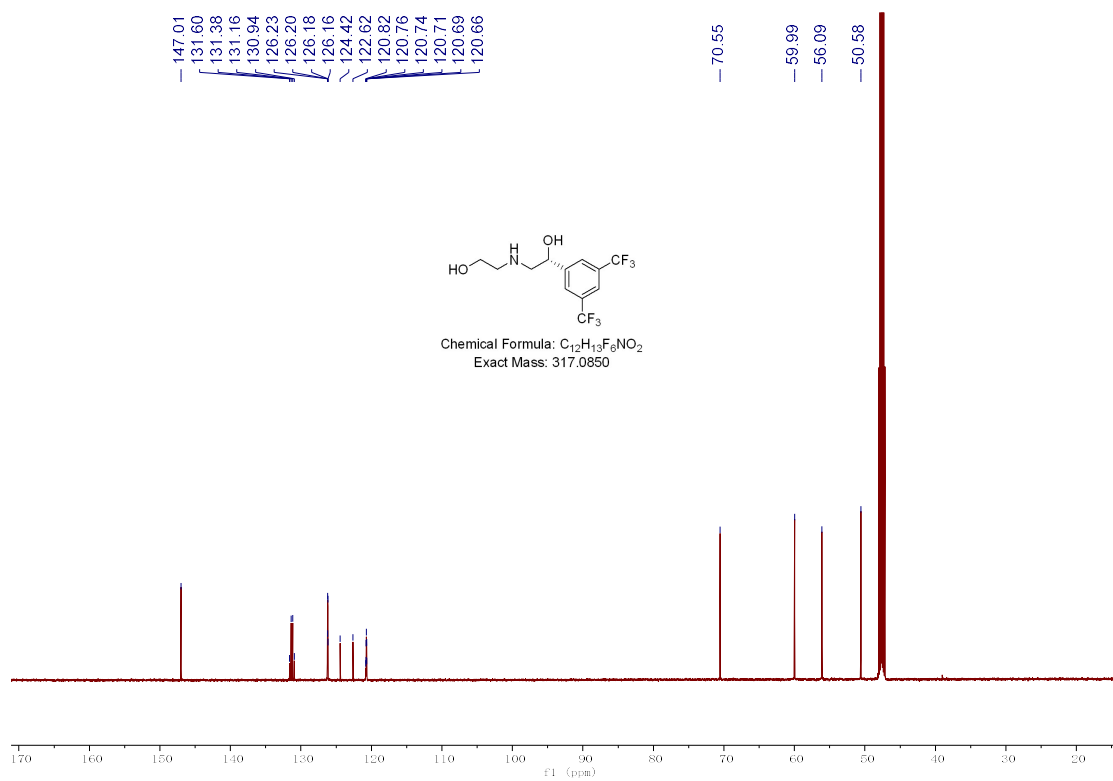

**$^{13}C$  NMR (151 MHz, Methanol- $d_4$ ) Spectrum of 20**

-64.33

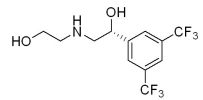

Chemical Formula: C<sub>12</sub>H<sub>13</sub>F<sub>6</sub>NO<sub>2</sub>  
Exact Mass: 317.0850

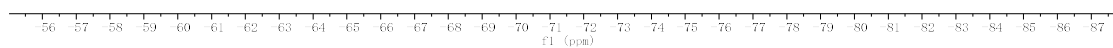

**<sup>19</sup>F NMR (565 MHz, Methanol-*d*<sub>4</sub>) Spectrum of 20**

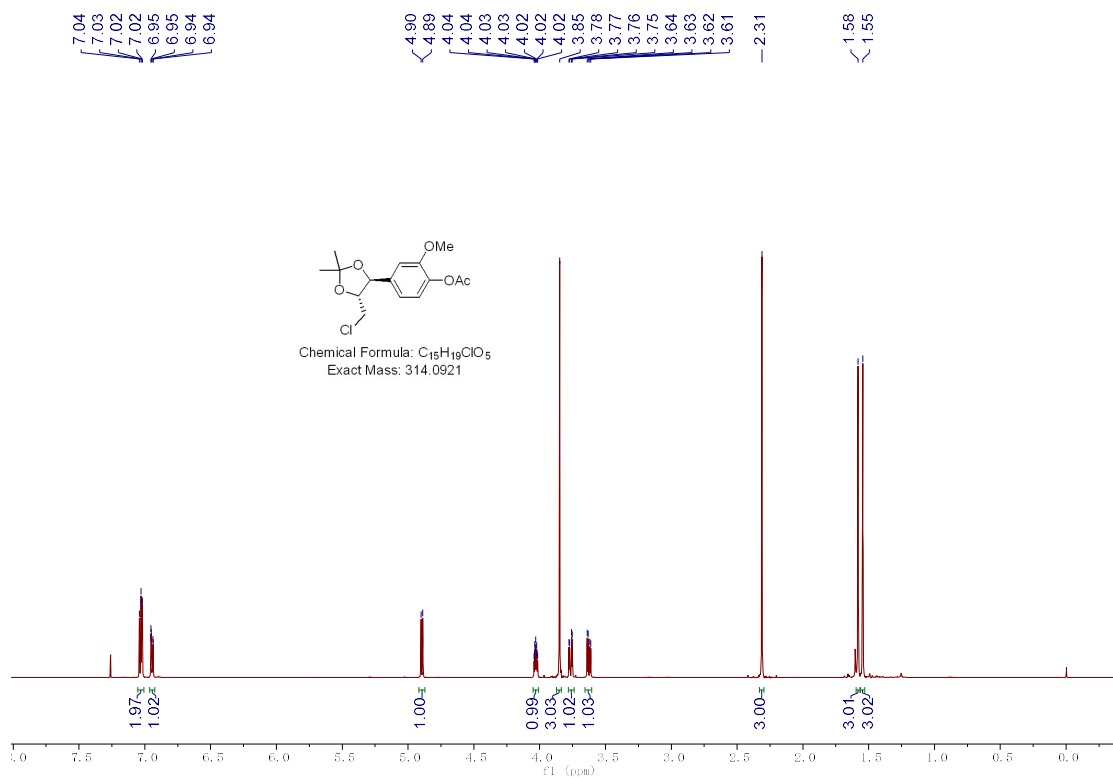

**<sup>1</sup>H NMR (600 MHz, CDCl<sub>3</sub>) Spectrum of 21**

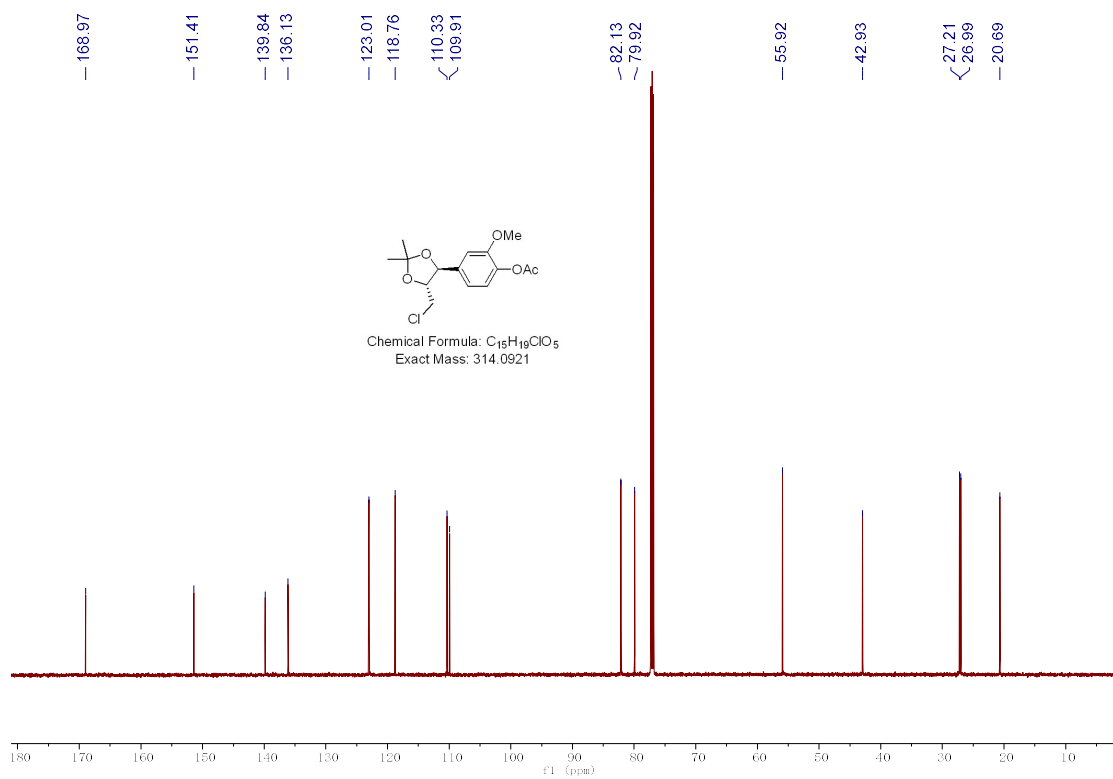

**<sup>13</sup>C NMR (151 MHz, CDCl<sub>3</sub>) Spectrum of 21**

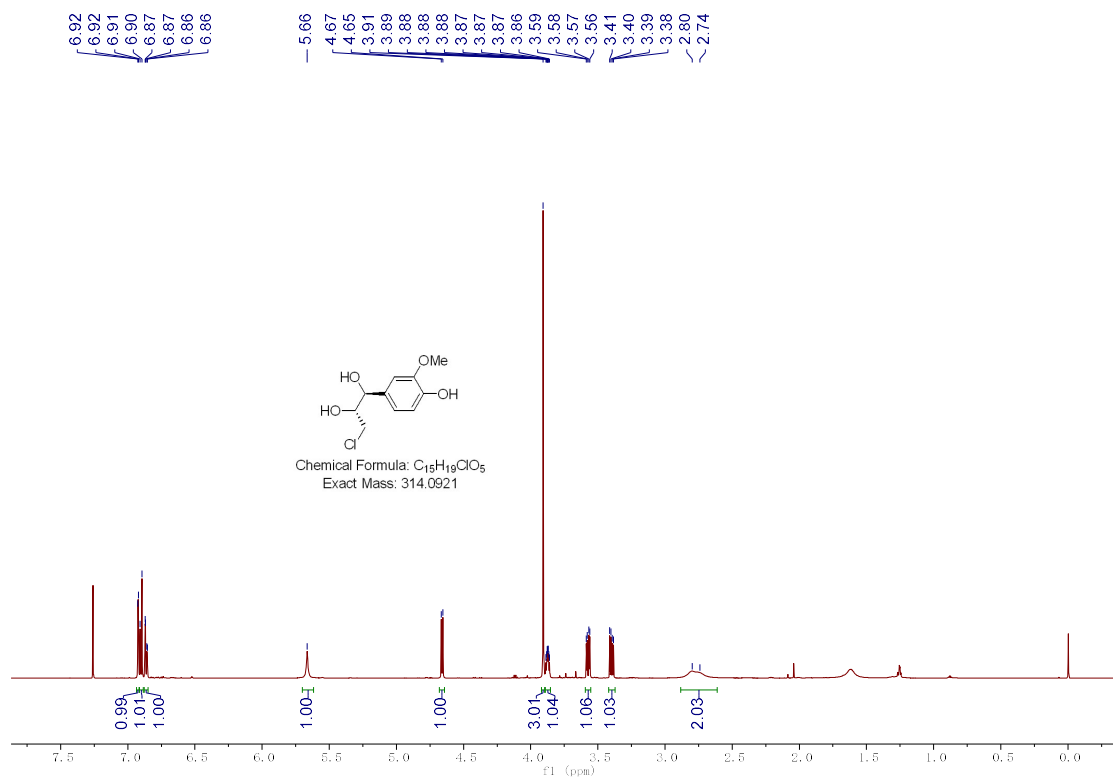

**<sup>1</sup>H NMR (600 MHz, CDCl<sub>3</sub>) Spectrum of 22**

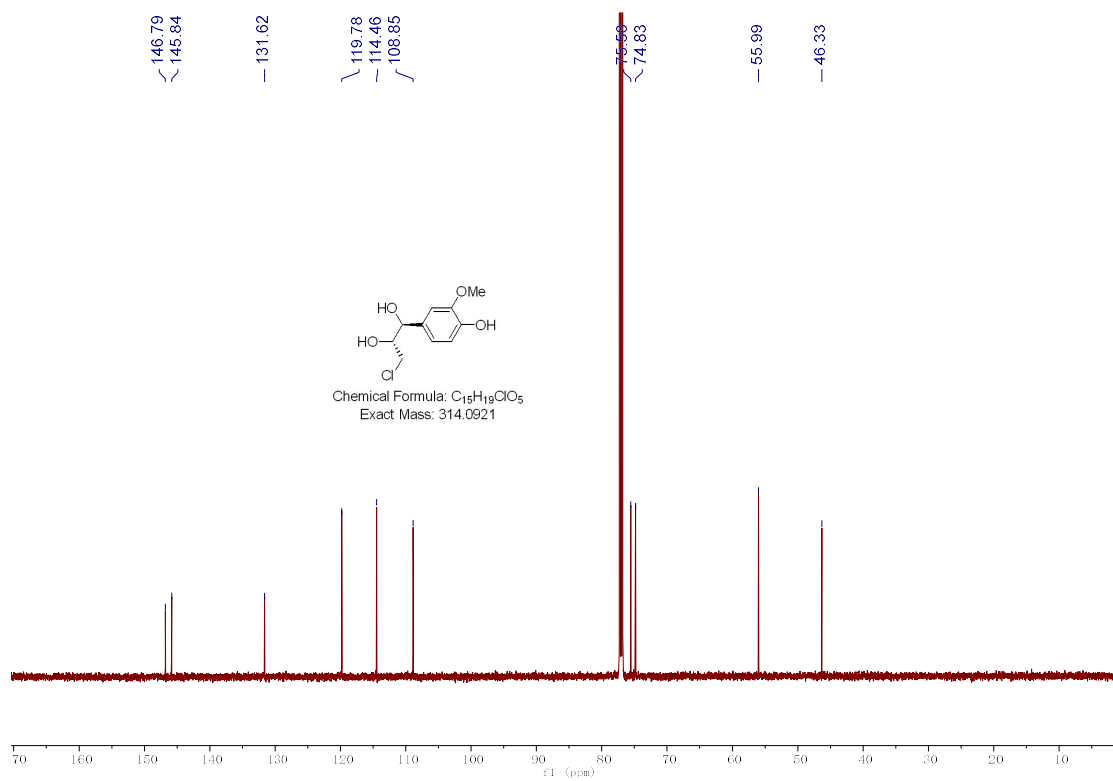

**<sup>13</sup>C NMR (151 MHz, CDCl<sub>3</sub>) Spectrum of 22**

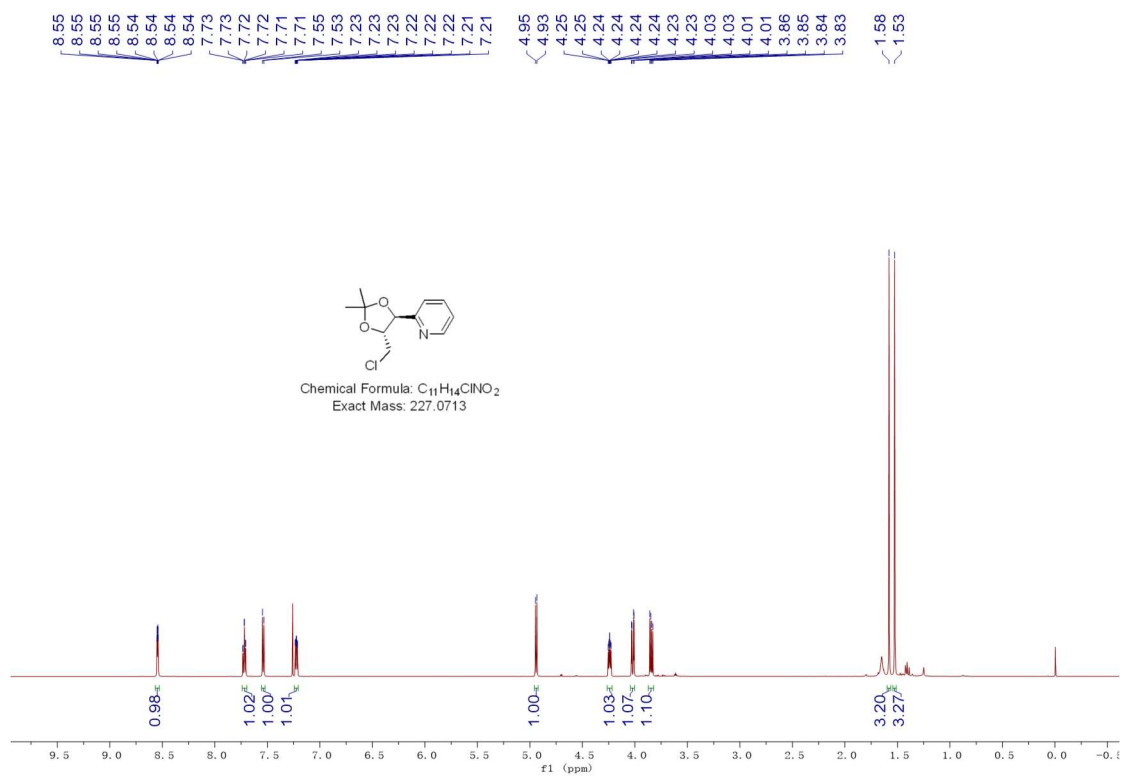

**<sup>1</sup>H NMR (600 MHz, CDCl<sub>3</sub>) Spectrum of 23**

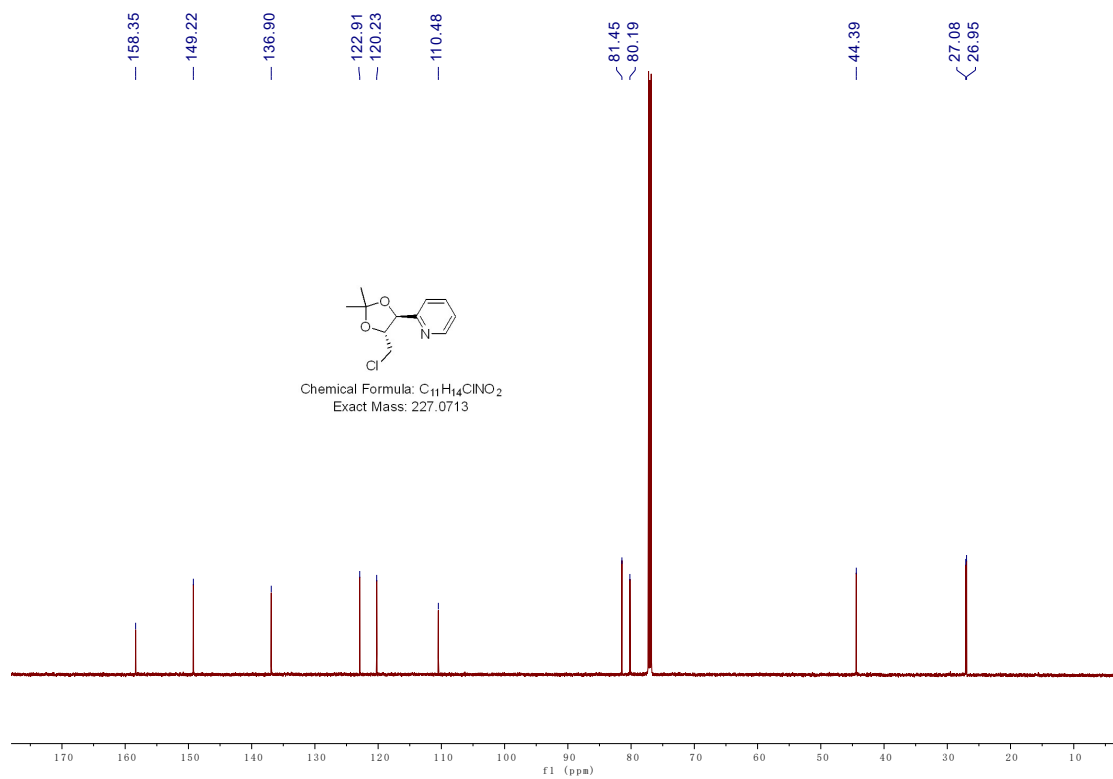

**<sup>13</sup>C NMR (151 MHz, CDCl<sub>3</sub>) Spectrum of 23**

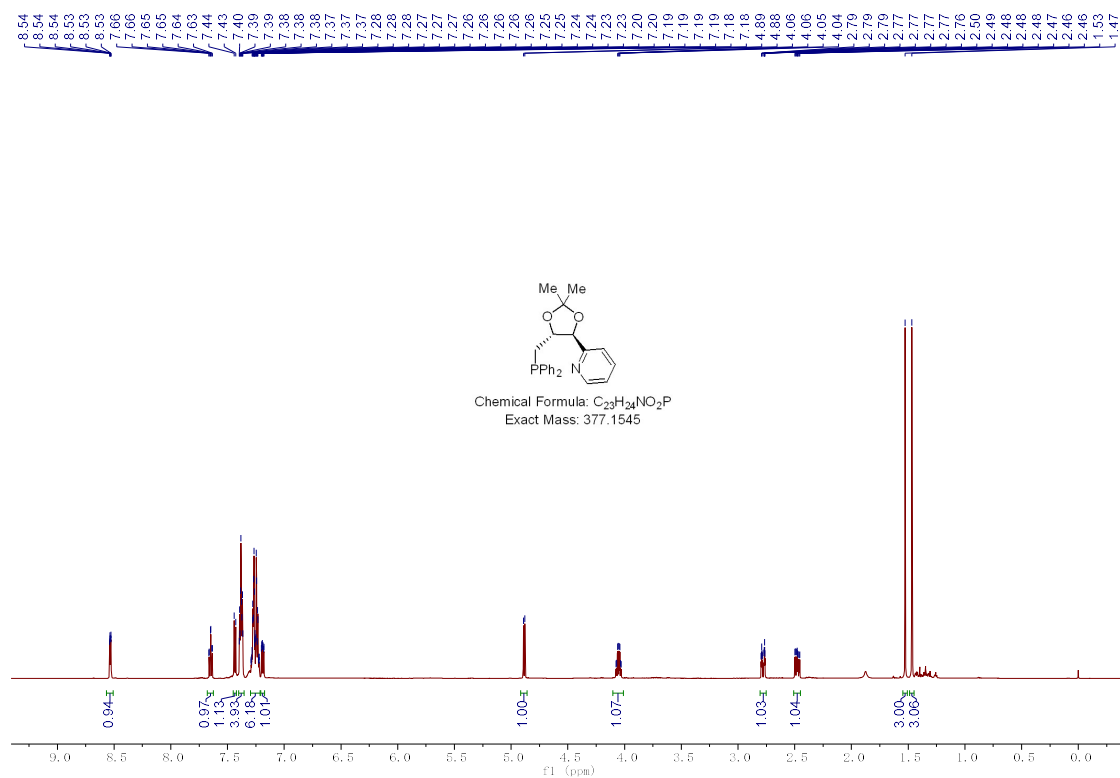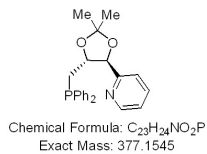

**$^1H$  NMR (600 MHz,  $CDCl_3$ ) Spectrum of 24**

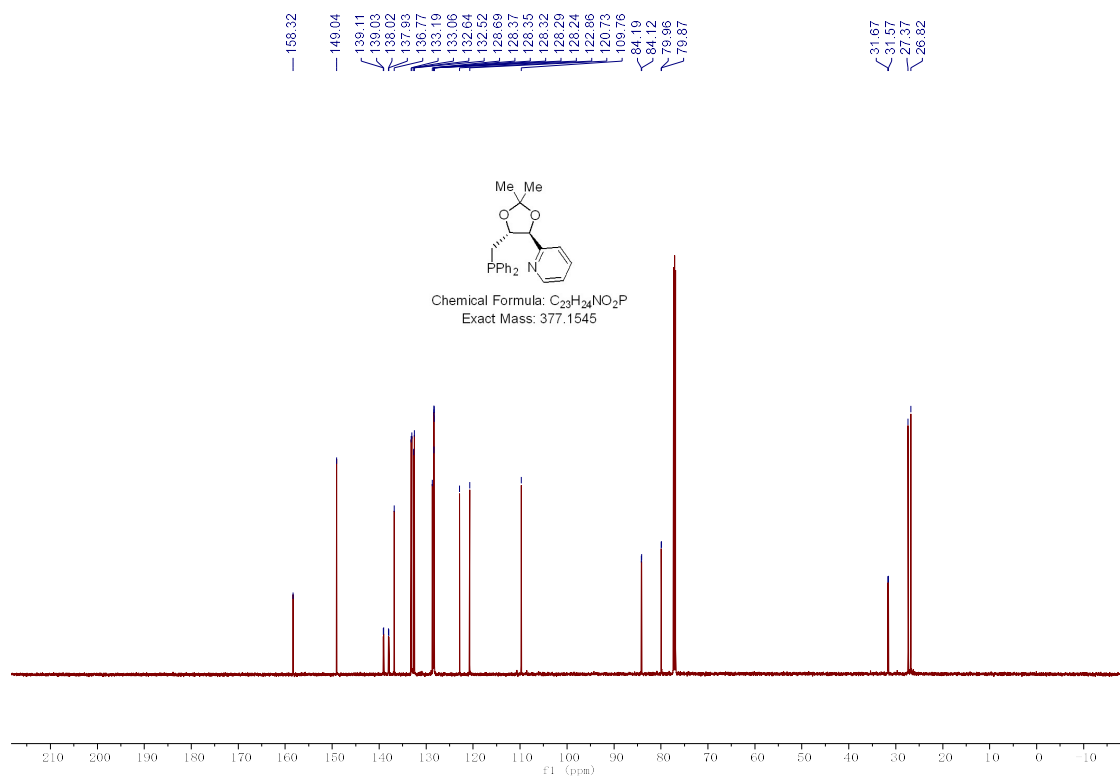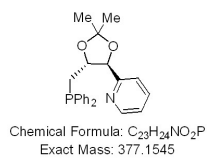

**$^{13}C$  NMR (151 MHz,  $CDCl_3$ ) Spectrum of 24**

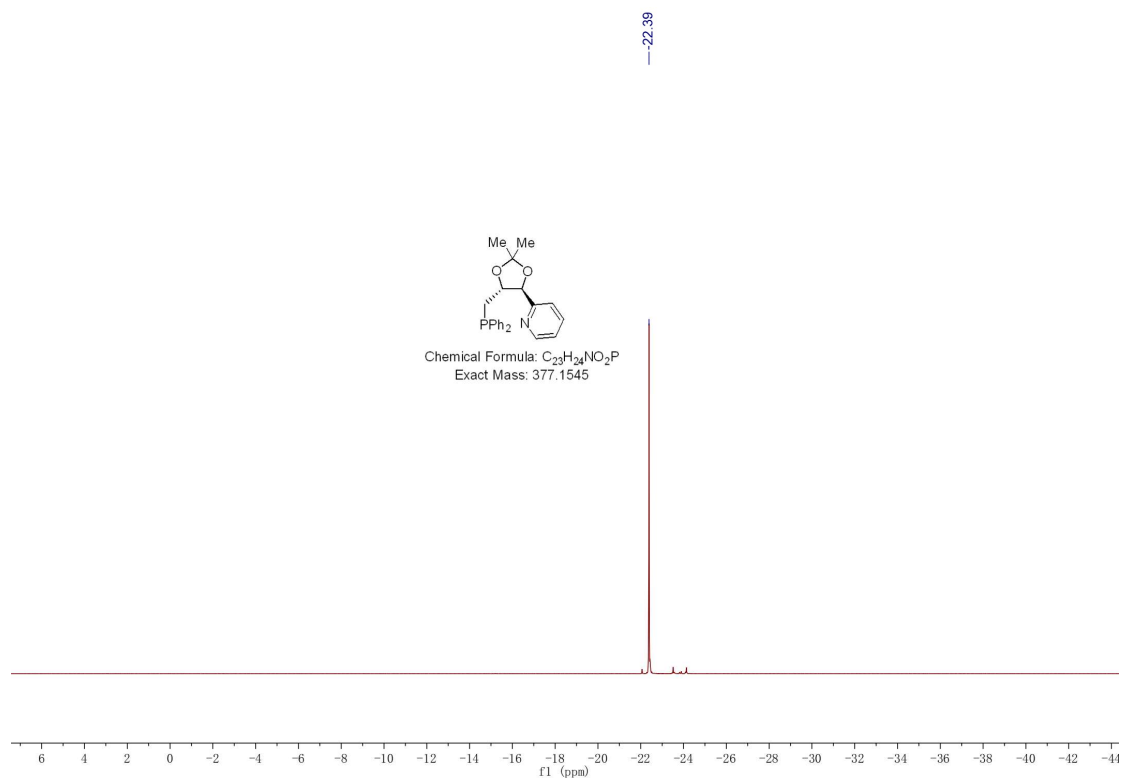

**<sup>13</sup>P NMR (243 MHz, CDCl<sub>3</sub>) Spectrum of 20**



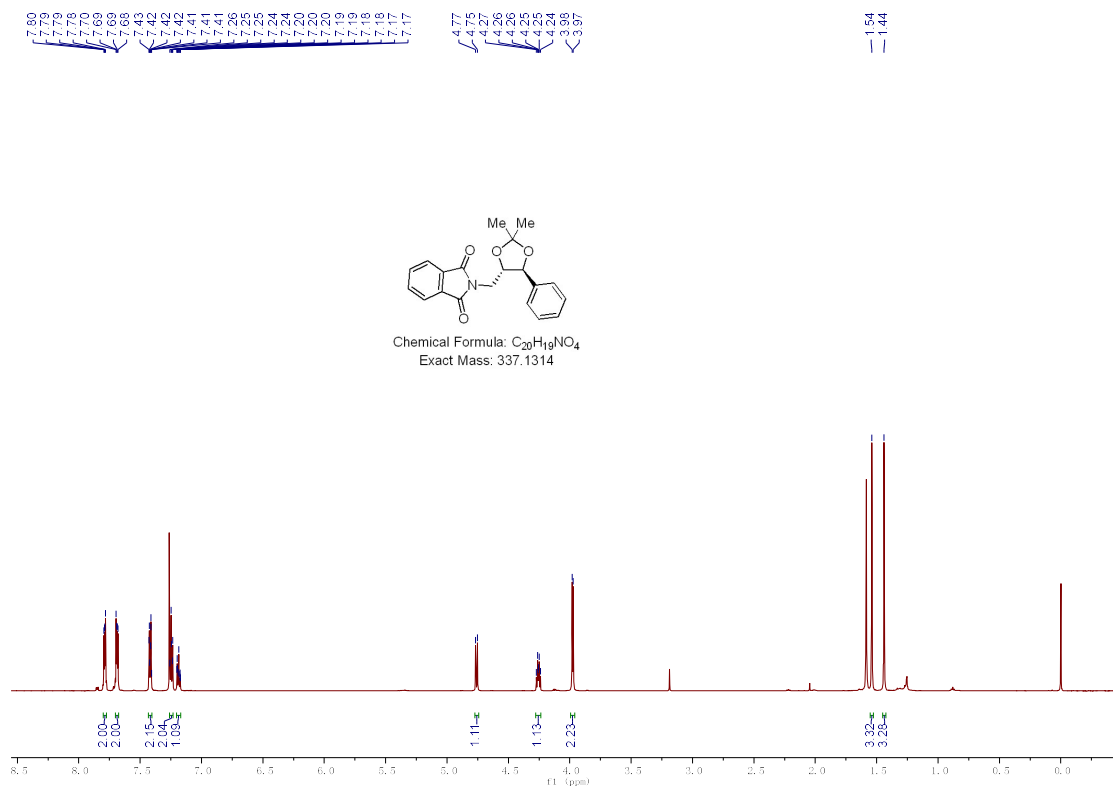

**<sup>1</sup>H NMR (600 MHz, Methanol-*d*<sub>4</sub>) Spectrum of 25**

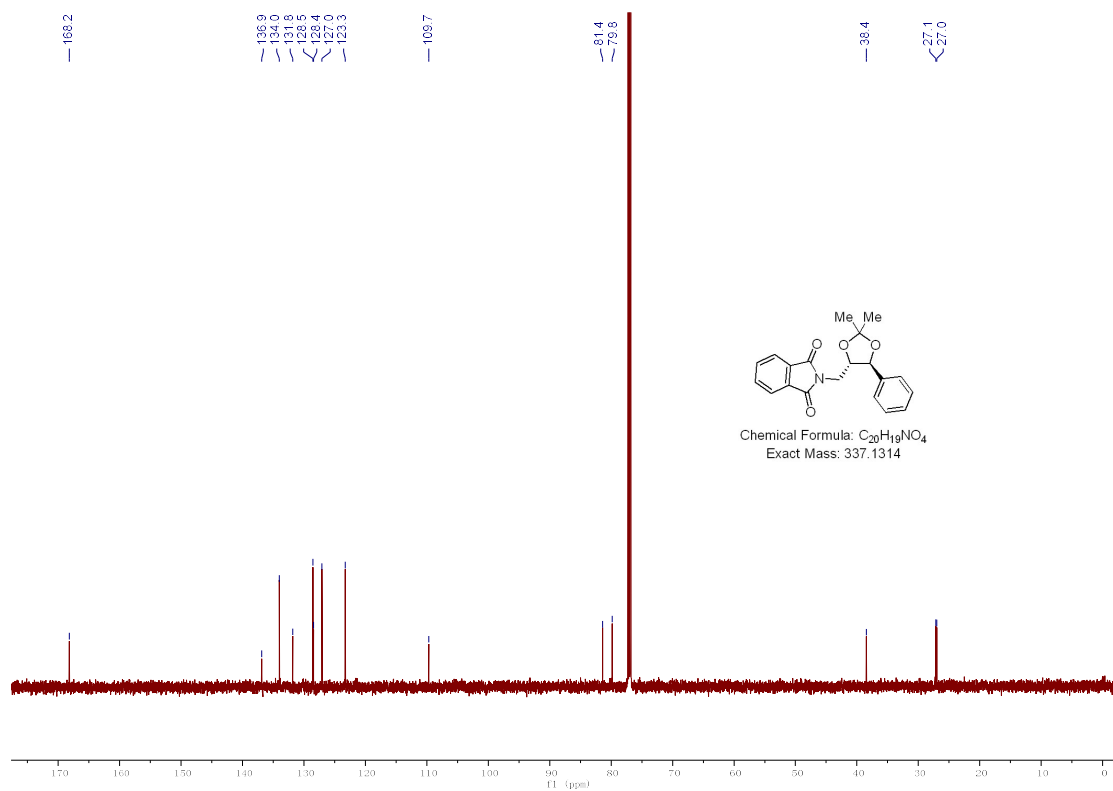

**<sup>13</sup>C NMR (151 MHz, Methanol-*d*<sub>4</sub>) Spectrum of 25**

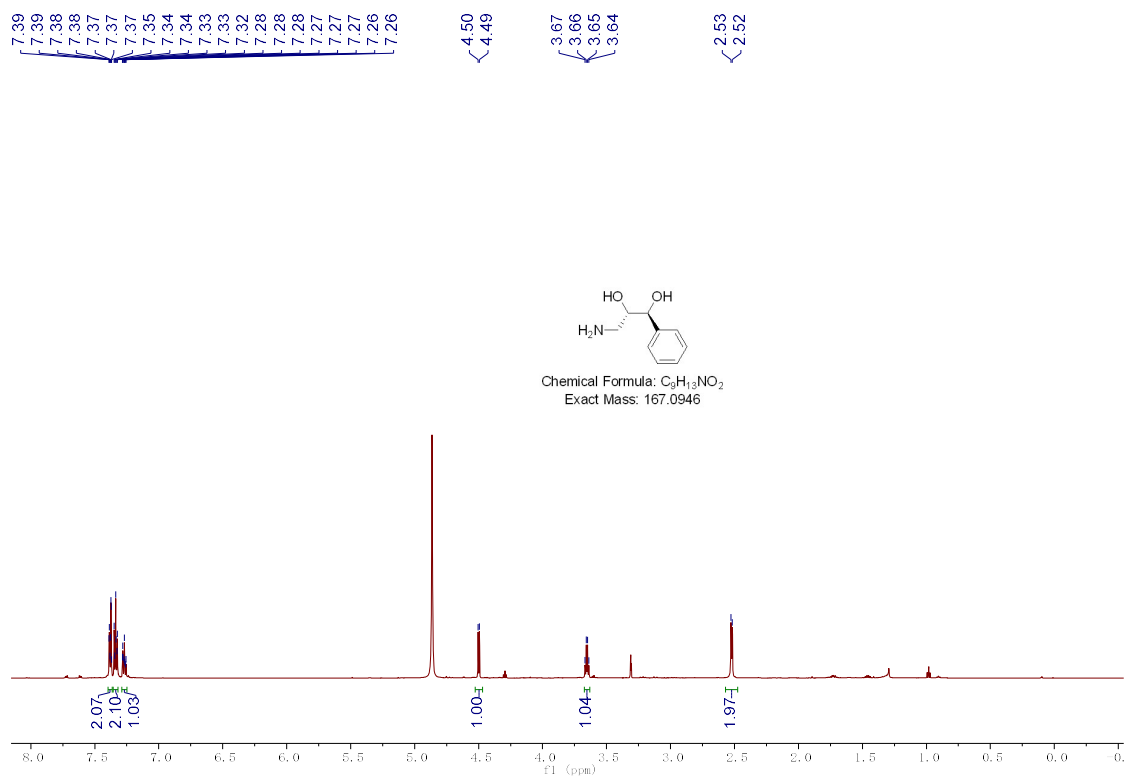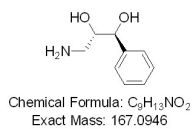

**$^1H$  NMR (600 MHz,  $CDCl_3$ ) Spectrum of 26**

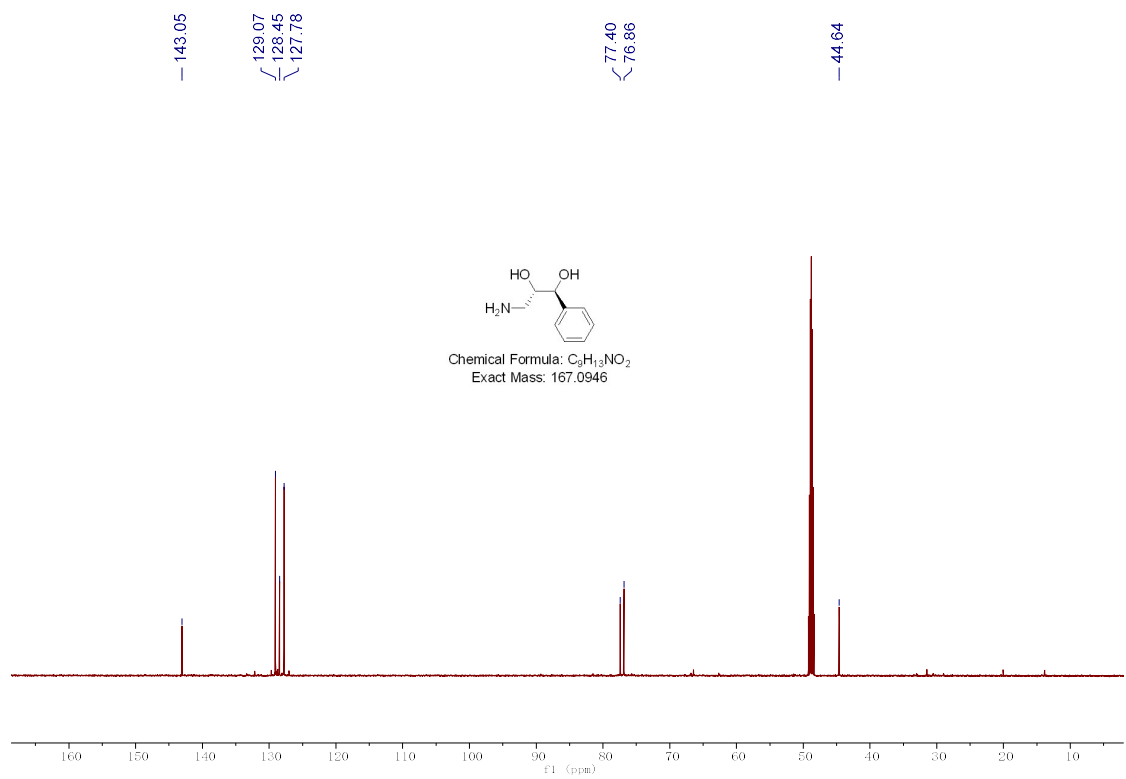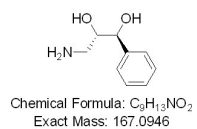

**$^{13}C$  NMR (151MHz,  $CDCl_3$ ) Spectrum of 26**

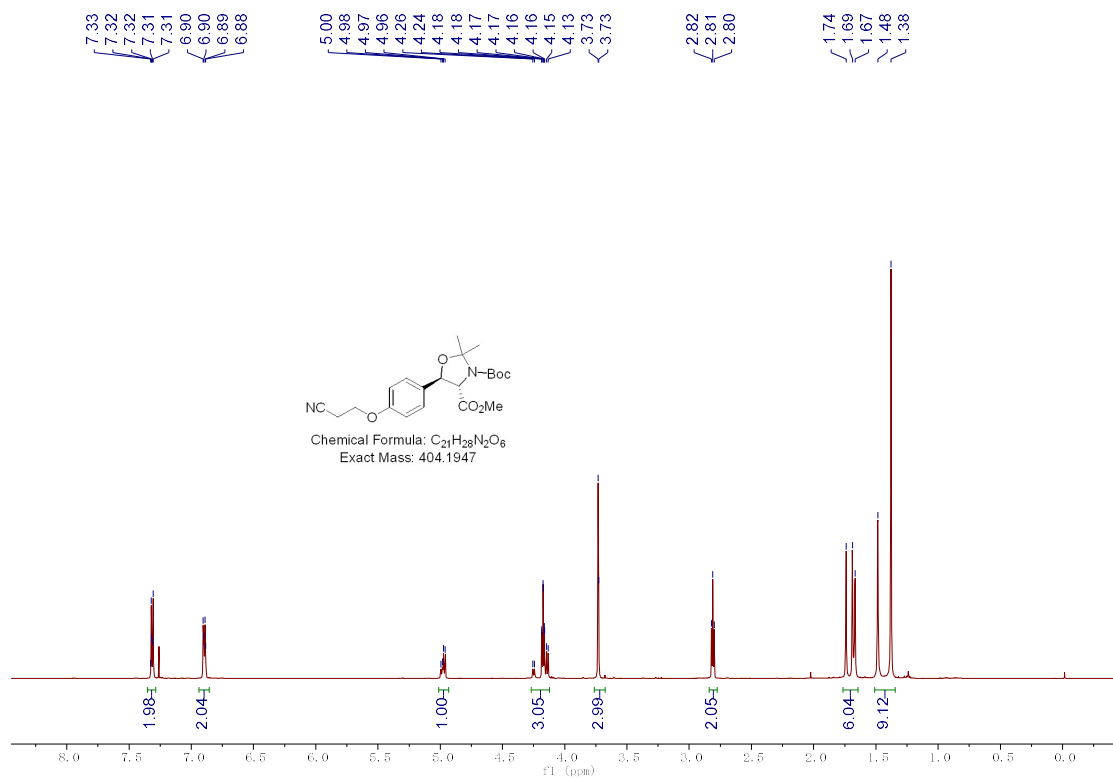

<sup>1</sup>H NMR (600 MHz, CDCl<sub>3</sub>) Spectrum of 28

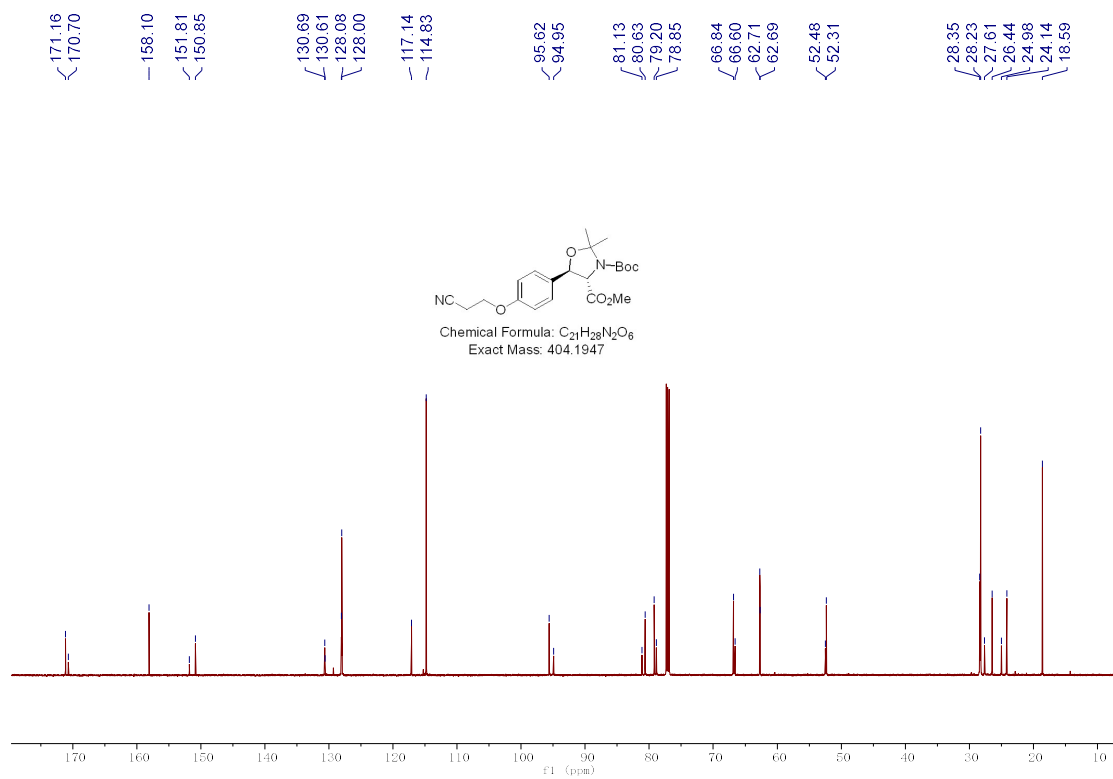

<sup>13</sup>C NMR (151 MHz, CDCl<sub>3</sub>) Spectrum of 28

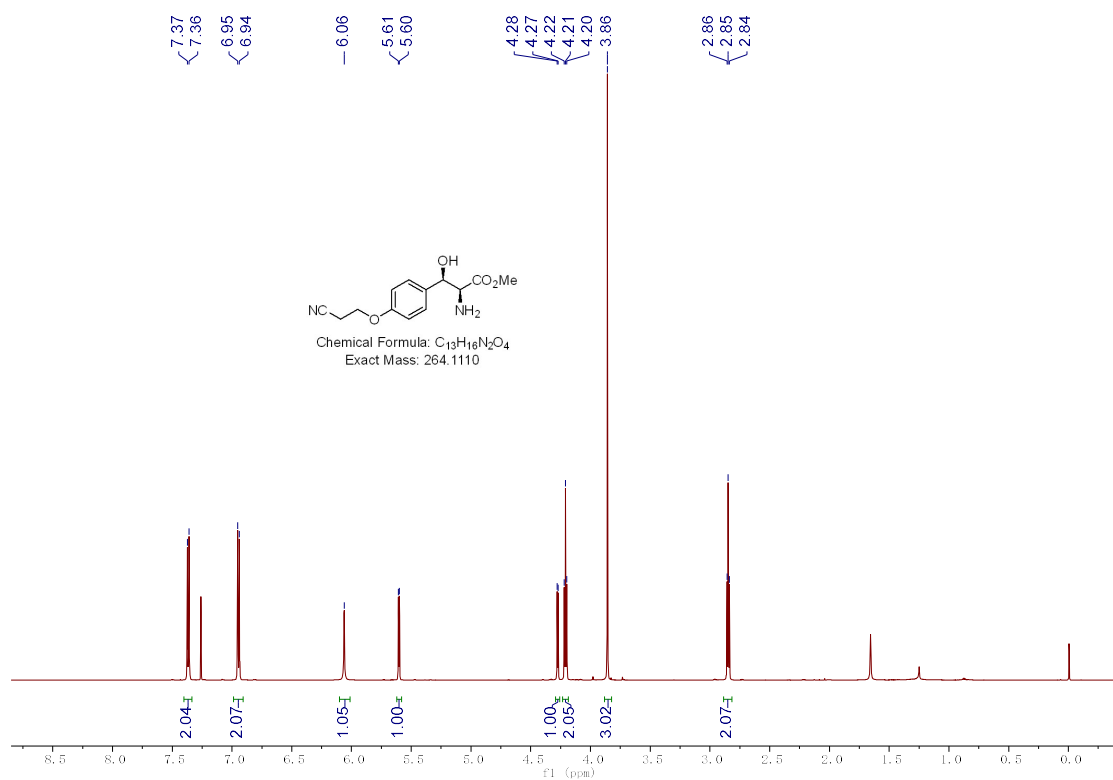

**<sup>1</sup>H NMR (600 MHz, CDCl<sub>3</sub>) Spectrum of 29**

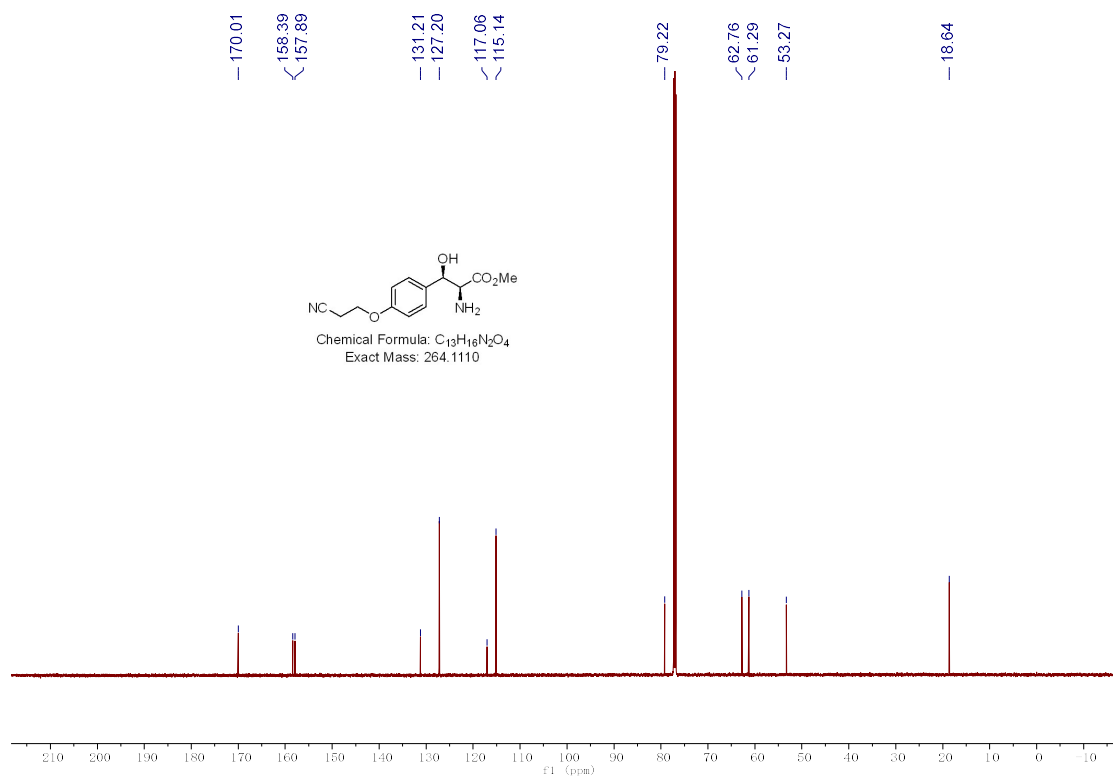

**<sup>13</sup>C NMR (151 MHz, CDCl<sub>3</sub>) Spectrum of 29**

## 9. Supplementary References

---

1. Buzzetti, L., Prieto, A., Roy, S. & Melchiorre, P. Radical-Based C-C Bond-Forming Processes Enabled by the Photoexcitation of 4-Alkyl-1,4-dihydropyridines. *Angew. Chem. Int. Ed.* **56**, 15039-15043 (2017).
2. Lin Q., Spielvogel E. & Diao T. Carbon-centered radical capture at nickel(II) complexes: Spectroscopic evidence, rates, and selectivity. *Chem* **9**, 1295-1308 (2023).
3. Benjamin, M., Rossbach, K. & Ralf W. Self-Assembled Nanoreactors as Highly Active Catalysts in the Hydrolytic Kinetic Resolution (HKR) of Epoxides in Water. *Angew. Chem. Int. Ed.* **45**, 1309-1312 (2006).
4. Teng, M., Nammalwar, B., Li, X., Perez, C. & Puerta, D. T. Preparation of heterocyclic compounds as antibacterial compounds. WO2022173758 A1 2022-08-18.
5. Schaus, S. E., Brandes, B. D., Larrow, J. F., Tokunaga, M.; Hansen, K. B., Gould, A. E., Furrow, M. E., Jacobsen, E. N. Highly Selective Hydrolytic Kinetic Resolution of Terminal Epoxides Catalyzed by Chiral (salen)Co(III) Complexes. Practical Synthesis of Enantioenriched Terminal Epoxides and 1,2-Diols. *J. Am. Chem. Soc.* **124**, 1307-1315 (2002).
6. Choi, Y. M. Sulfamate derivative compound for use in preventing or treating epilepsy. CN106507667A·2017-03-15.
7. Nagata, T., Takai, T., Yamada, T., Imagawa, K. & Mukaiyama, T. Direct and stereoselective preparation of optically active 1, 3-dioxolanes from the corresponding chiral styrene oxides. *Bull. Chem. Soc. Jpn.* **67**, 2614-2616 (1994).
8. Gao, L., Zhou, C., Wang, R., Lan, F., An, B., Huang, X. & Zhang, X. Unveiling inverse vulcanized polymers as metal-free, visible-light-driven photocatalysts for cross-coupling reactions. *Chin. Chem. Lett.* **35**, 108832 (2024).
9. Rajput, V. K. & Mukhopadhyay, B. Sulfuric acid immobilized on silica: an efficient reusable catalyst for the synthesis of o-isopropylidene sugar derivatives. *Tetrahedron Lett.* **47**, 5939-5941 (2006).
10. Pye, P. J., Rossen, K., Weissman, S. A., Maliakal, A., Reamer, R. A., Ball, R., Tsou, N., Volante, R. P. & Reider, P. J. Crystallization - Induced Diastereoselection: Asymmetric

---

Synthesis of Substance P Inhibitors. *Chem. Eur. J.* **8**, 1372-1376 (2002).

11. Cai, J., Wen, Y., Sheng, W., Huang, X., Zheng, Y., Song, C. & Li, J. Electrochemical ring-opening 1,3-dihydroxylation of arylcyclopropanes with H<sub>2</sub>O. *Green Chem.* **25**, 6618-6622 (2023).

12. Mei, Y., Zhang, Q.-W., Gu, Q., Liu, Z., He, X. & Tian, Y. Pillar[5]arene-Based Fluorescent Sensor Array for Biosensing of Intracellular Multi-neurotransmitters through Host-Guest Recognitions *J. Am. Chem. Soc.* **144**, 2351-2359 (2022).

13. Borowiecki, P.; Wawro, A.; Winska, P.; Wielechowska, M.; Bretner, M. Synthesis of novel chiral TBBt derivatives with hydroxyl moiety. Studies on inhibition of human protein kinase CK2 $\alpha$  and cytotoxicity properties. *Eur. J. Med. Chem.* **84**, 364-374 (2014).

14. Cho, B., Yang, W. & Choi, O. Convenient synthesis of optically active 1,2-diol monosulfonates and terminal epoxides *via* oxazaborolidine-catalyzed asymmetric borane reduction of  $\alpha$ -sulfonyloxy ketones. *J. Chem. Soc., Perkin Trans. 1*, **2001**, 1204-1211 (2001).

15. Wang, Q., He, K., Li, Y., Li, D., Li, Y. & Hou, Z. Enantioselective Synthesis and Absolute Configuration of the Natural Threo-3-Chloro-1-(4-Hydroxy-3-Methoxyphenyl)Propane-1,2-Diol. *J. Chem. Res.* **2004**, 504-505 (2004).

16. Chelucci, G., Cabras, M. A., Botteghi, C. & Marchetti, M. (-)-(4*S*,5*R*)-4-(2-Pyridyl)-5-(Diphenylphosphino)methyl-2,2-Dimethyl-1,3-Dioxolane A New Chiral Ligand for Enantioselective Catalysis. *Tetrahedron: Asymmetry* **5**, 299-302 (1994).

17. Liu, C., Lin, Z.W., Zhou, Z.-H. & Chen, H.-B. Stereodivergent synthesis of all the four stereoisomers of antidepressant reboxetine. *Org. Biomol. Chem.* **15**, 5395-5401 (2017).
